# Supplementary material for: Efficient enantioselective synthesis of CF2H-containing dispiro[benzo[b]thiophene-oxindole-pyrrolidine]s via organocatalytic cycloaddition
Source: Royal Society of Chemistry journal article supplement (doi:10.1039/d1qo01392k), 2021-11-24

## Supporting Information

### Efficient Enantioselective Synthesis of CF<sub>2</sub>H-Containing Dispiro [benzo [b] thiophene – oxindole - pyrrolidine]s via Organocatalytic Cycloaddition

Yabo Deng,<sup>a</sup> Yongzhen Li,<sup>a</sup> Yalan Wang,<sup>a</sup> Shuo Sun,<sup>a</sup> Pengfei Jia,<sup>a</sup> Sichao Ma,<sup>a</sup> Wenguang Li,<sup>a\*</sup> Kairong Wang,<sup>a\*</sup> and Wenjin Yan<sup>a\*</sup>

*The Institute of Pharmacology, School of Basic Medical Sciences, Lanzhou University, Lanzhou  
730000, China*

E-mail: \*liwg@lzu.edu.cn; \*wangkr@lzu.edu.cn; \*yanwj@lzu.edu.cn

## Table of Contents

|                                                                                                     |     |
|-----------------------------------------------------------------------------------------------------|-----|
| 1. General Information .....                                                                        | S2  |
| 2. Reference .....                                                                                  | S2  |
| 3. General procedures for substrates difluoromethyl imines.....                                     | S2  |
| 4. Physical and chemical data of the substrate difluoromethyl imines.....                           | S3  |
| 5. General Procedure for the Synthesis of 3aa–3ka .....                                             | S5  |
| 6. General Procedure for the Synthesis of 5aa–5ak .....                                             | S6  |
| 7. Analytical Data and HPLC Chromatogram of the Products .....                                      | S6  |
| 8. Gram-scale asymmetric cycloaddition for the synthesis of 3aa .....                               | S52 |
| 9. Gram-scale asymmetric cycloaddition for the synthesis of 3ag.....                                | S52 |
| 10. Synthetic transformation of 3aa .....                                                           | S53 |
| 11. X-ray Structures of Compounds 3aa and 3ag.....                                                  | S55 |
| 12. Copies of <sup>1</sup> H, <sup>19</sup> F and <sup>13</sup> C{ <sup>1</sup> H} NMR Spectra..... | S55 |

## 1. General Information

Reactions were monitored by thin layer chromatography (TLC), and compounds were visualized with a UV light at 254 nm and 365 nm. Column chromatography purifications were carried out using silica gel.  $^1\text{H}$ ,  $^{13}\text{C}\{^1\text{H}\}$  and  $^{19}\text{F}$  NMR spectra were recorded on a Bruker (300 MHz or 400 MHz) spectrometer in  $\text{CDCl}_3$  using tetramethylsilane (TMS) as internal standard. Data are presented as follows: chemical shift, integration, multiplicity (br = broad, s = singlet, d = doublet, t = triplet, q = quartet, m = multiplet) and coupling constant in Hertz (Hz). Mass peaks are identified by the corresponding  $m/z$  values. The ee values determination was carried out using chiral high-performance liquid chromatography (HPLC) with Daicel Chiralpak (IA, IB, IA-3) and Daicel Chiralcel OD-H column. (Note: The mobile phase of all I series chiral columns is added with 5% DCM to help dissolve) Optical rotations were measured on a digital polarimeter and are reported as follows:  $[\alpha]_D^{25}$  (1 g/100 mL,  $\text{CHCl}_3$ ).

All solvents were obtained from commercial sources and were purified according to standard procedures. The starting material methyleneindolinone<sup>[1]</sup> and difluoromethyl imine<sup>[2]</sup> was synthesized by literature method. The derivative 7a was synthesized by literature method<sup>[3]</sup>.

## 2. Reference

[1] Cao, S.-H.; Zhang, X.-C.; Wei, Y.; Shi, M. Chemoselective Reduction of Isatin-Derived Electron-Deficient Alkenes Using Alkylphosphanes as Reduction Reagents, *Eur. J. Org. Chem.* **2011**, *14*, 2668-2672.

[2] Gao, F.-Y.; Guo, Y.-F.; Sun, M.-M.; Wang, Y.-L.; Yang, C.-Y.; Wang, Y.-Q.; Wang K.-R.; and Yan, W.-J. Catalytic Asymmetric Construction of Tertiary Carbon Centers Featuring an  $\alpha$ -Difluoromethyl Group with  $\text{CF}_2\text{H}-\text{CH}_2-\text{NH}_2$  as the “Building Block”, *Org. Lett.* **2021**, *23*, 2584-2589.

[3] Nandakumar, M.; Karunakaran, J.; Mohanakrishnan, A. K. Diels–Alder Reaction of 1,3-Diarylbenzo[*c*]furans with Thiophene *S,S*-Dioxide/Indenone Derivatives: A Facile Preparation of Substituted Dibenzothiophene *S,S*-Dioxides and Fluorenones, *Org. Lett.* **2014**, *16*, 3068-3071.

## 3. General procedures for substrates difluoromethyl imines

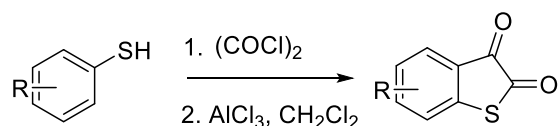

Oxalyl chloride (1.1 equiv., 10.7 mmol) was added dropwise to a solution of thiophenol with different substituents (1 equiv., 9.7 mmol) in anhydrous  $\text{Et}_2\text{O}$  (30 mL) at  $0\text{ }^\circ\text{C}$  under a  $\text{N}_2$  atmosphere, and the reaction stirred for 1.5 hours, warming to room temperature. The reaction mixture was concentrated in vacuo and the residue dissolved

in anhydrous  $\text{CH}_2\text{Cl}_2$  (40 mL). Aluminium chloride (3.6 equiv., 35 mmol) was added portionwise at 0 °C and the reaction mixture then stirred for 16 hours, slowly warming to room temperature. Upon completion, an ice/1M HCl mixture was added dropwise until the reaction turned clear and was then stirred for a further hour. The phases were separated and the aqueous layer extracted with  $\text{CH}_2\text{Cl}_2$  (3 x 25 mL). The organic phases were combined, dried ( $\text{Na}_2\text{SO}_4$ ), filtered and concentrated in vacuo to give the crude product, which was recrystallized from ethyl acetate to give benzo[*b*]thiophene-2,3-dione with different substituents. (yield: 50-83%).

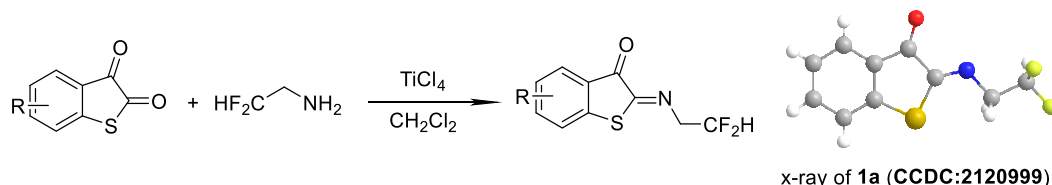

In a 100 mL round-bottom flask, 2,2-difluoroethan-1-amine (9.0 mmol, 1.5equiv.) and Benzo[*b*]thiophene-2,3-dione with different substituents (6.0 mmol, 1.0 equiv.) were dissolved with 60 mL DCM was added to the solution. Then the mixture was cooled to 0 °C, and then titanium tetrachloride (7.2 mmol, 1.2 equiv.) was added dropwise to the solution and the reaction mixture was stirred at room temperature until TLC revealed complete conversion of benzo[*b*]thiophene-2,3-dione with different substituents. After the reaction completed, the mixture was quenched by 10% NaOH solution and filtered. The organic layer was washed with saturated  $\text{NaHCO}_3$ , saturated NaCl, and dried over  $\text{Na}_2\text{SO}_4$ . Organic layer was concentrated under reduced pressure, the crude mixture was purified by silica-gel column chromatography to obtain the target product (yield: 45-70%).

#### 4. Physical and chemical data of the substrate difluoromethyl imines

##### (*Z*)-2-((2,2-difluoroethyl)imino)benzo[*b*]thiophen-3(2H)-one

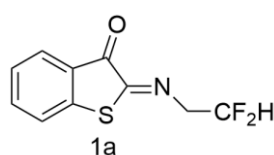

Brown yellow solid, Mp. = 65-66 °C.  $^1\text{H}$  NMR (300 MHz,  $\text{CDCl}_3$ )  $\delta$  7.95 – 7.87 (m, 1H), 7.72 – 7.60 (m, 1H), 7.44 (s, 1H), 7.36 (td,  $J$  = 7.6, 0.9 Hz, 1H), 6.34 (tt,  $J$  = 55.6, 4.5 Hz, 1H), 3.94 (td,  $J$  = 14.3, 4.5 Hz, 2H).  $^{13}\text{C}$  { $^1\text{H}$ } NMR (75 MHz,  $\text{CDCl}_3$ )  $\delta$  184.6, 161.3, 142.4, 137.4, 128.0, 127.9, 127.1, 125.1, 114.5 (t,  $J_{\text{C-F}}$  = 180.0 Hz), 60.5 (t,  $J_{\text{C-F}}$  = 20.6 Hz).  $^{19}\text{F}$  NMR (282 MHz,  $\text{CDCl}_3$ )  $\delta$  -120.50. HRMS (ESI)  $m/z$  calcd for  $\text{C}_{10}\text{H}_7\text{F}_2\text{NOSNa}$  [ $\text{M}+\text{Na}$ ] $^+$ : 250.0109, found 250.0096.

##### (*Z*)-5-bromo-2-((2,2-difluoroethyl)imino)benzo[*b*]thiophen-3(2H)-one

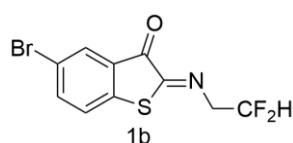

Brown solid, Mp. = 78-79 °C.  $^1\text{H}$  NMR (400 MHz,  $\text{CDCl}_3$ )  $\delta$  8.04 (d,  $J$  = 1.8 Hz, 1H), 7.77 (dd,  $J$  = 8.3, 1.9 Hz, 1H), 7.35 (d,  $J$  = 8.3 Hz, 1H), 6.33 (tt,  $J$  = 55.5, 4.4 Hz, 1H), 3.94 (td,  $J$  = 14.2, 4.4 Hz, 2H).  $^{13}\text{C}$  { $^1\text{H}$ } NMR (101 MHz,  $\text{CDCl}_3$ )  $\delta$  183.4, 160.5, 141.1, 140.0, 130.6, 129.3, 129.2, 126.4, 121.0, 114.4 (t,  $J_{\text{C-F}}$  = 242.4 Hz), 60.5 (t,  $J_{\text{C-F}}$  = 27.7 Hz).  $^{19}\text{F}$  NMR (376 MHz,  $\text{CDCl}_3$ )  $\delta$  -120.5. HRMS (ESI)  $m/z$  calcd for  $\text{C}_{10}\text{H}_7\text{BrF}_2\text{NOS}$  [ $\text{M}+\text{H}$ ] $^+$ : 327.9214, found 327.9199.

##### (*Z*)-5-(tert-butyl)-2-((2,2-difluoroethyl)imino)benzo[*b*]thiophen-3(2H)-one

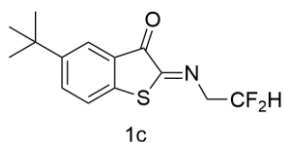

Red solid, Mp. = 50-51 °C.  $^1\text{H}$  NMR (400 MHz,  $\text{CDCl}_3$ )  $\delta$  7.94 (d,  $J$  = 2.0 Hz, 1H), 7.71 (dd,  $J$  = 8.3, 2.1 Hz, 1H), 7.37 (d,  $J$  = 8.3 Hz, 1H), 6.34 (tt,  $J$  = 55.6, 4.5 Hz, 1H), 3.93 (td,  $J$  = 14.3, 4.5 Hz, 2H), 1.35 (s, 9H).  $^{13}\text{C}\{^1\text{H}\}$  NMR (101 MHz,  $\text{CDCl}_3$ )  $\delta$  184.9, 162.1, 151.0, 139.4, 135.2, 127.8, 124.7, 124.6, 114.6 (t,  $J_{\text{C-F}}$  = 241.9 Hz), 60.4 (t,  $J_{\text{C-F}}$  = 25.3 Hz), 34.9, 31.1.  $^{19}\text{F}$  NMR (376 MHz,  $\text{CDCl}_3$ )  $\delta$  -120.5. HRMS (ESI)  $m/z$  calcd for  $\text{C}_{14}\text{H}_{15}\text{F}_2\text{NOSNa}$   $[\text{M}+\text{Na}]^+$ : 306.0735, found 306.0735.

**(Z)-2-((2,2-difluoroethyl)imino)-6-fluorobenzo[b]thiophen-3(2H)-one**

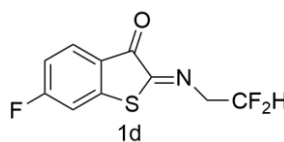

Yellow solid, Mp. = 70-71 °C.  $^1\text{H}$  NMR (400 MHz,  $\text{CDCl}_3$ )  $\delta$  7.96 (dd,  $J$  = 8.5, 5.4 Hz, 1H), 7.17 (dd,  $J$  = 7.9, 2.2 Hz, 1H), 7.06 (td,  $J$  = 8.5, 2.2 Hz, 1H), 6.33 (tt,  $J$  = 55.5, 4.5 Hz, 1H), 3.95 (td,  $J$  = 14.2, 4.5 Hz, 2H).  $^{13}\text{C}\{^1\text{H}\}$  NMR (101 MHz,  $\text{CDCl}_3$ )  $\delta$  182.6, 169.3, 166.6, 160.5, 145.4, 145.3, 130.3, 130.2, 124.6, 124.6, 112.0, 115.2, 115.0, 114.4 (t,  $J_{\text{C-F}}$  = 242.4 Hz), 112.7, 112.4, 60.4 (t,  $J_{\text{C-F}}$  = 27.7 Hz).  $^{19}\text{F}$  NMR (376 MHz,  $\text{CDCl}_3$ )  $\delta$  -95.7, -120.5. HRMS (ESI)  $m/z$  calcd for  $\text{C}_{10}\text{H}_6\text{F}_3\text{NOSNa}$   $[\text{M}+\text{Na}]^+$ : 268.0014, found 268.0003.

**(Z)-6-chloro-2-((2,2-difluoroethyl)imino)benzo[b]thiophen-3(2H)-one**

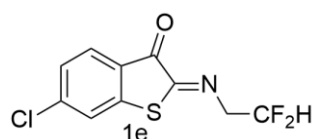

Yellow solid, Mp. = 132-133 °C.  $^1\text{H}$  NMR (400 MHz,  $\text{CDCl}_3$ )  $\delta$  7.55 (t,  $J$  = 7.9 Hz, 1H), 7.38 – 7.24 (m, 2H), 6.33 (tt,  $J$  = 55.6, 4.4 Hz, 1H), 3.93 (td,  $J$  = 14.3, 4.4 Hz, 2H).  $^{13}\text{C}\{^1\text{H}\}$  NMR (101 MHz,  $\text{CDCl}_3$ )  $\delta$  181.5, 160.3, 144.7, 136.9, 136.8, 129.4, 124.0, 123.5, 114.5 (t,  $J_{\text{C-F}}$  = 325.0 Hz), 60.4 (t,  $J_{\text{C-F}}$  = 37.0 Hz).  $^{19}\text{F}$  NMR (376 MHz,  $\text{CDCl}_3$ )  $\delta$  -120.5. HRMS (ESI)  $m/z$  calcd for  $\text{C}_{10}\text{H}_6\text{ClF}_2\text{NOSNa}$   $[\text{M}+\text{Na}]^+$ : 283.9719, found 283.9720.

**(Z)-6-bromo-2-((2,2-difluoroethyl)imino)benzo[b]thiophen-3(2H)-one**

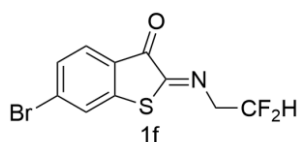

Pink solid, Mp. = 81-82 °C.  $^1\text{H}$  NMR (400 MHz,  $\text{CDCl}_3$ )  $\delta$  7.55 (dd,  $J$  = 7.7, 1.1 Hz, 1H), 7.47 – 7.39 (m, 2H), 6.33 (tt,  $J$  = 55.6, 4.5 Hz, 1H), 3.94 (td,  $J$  = 14.2, 4.5 Hz, 2H).  $^{13}\text{C}\{^1\text{H}\}$  NMR (101 MHz,  $\text{CDCl}_3$ )  $\delta$  181.8, 160.4, 145.3, 136.9, 132.7, 125.2, 124.6, 124.1, 114.5 (t,  $J_{\text{C-F}}$  = 241.9 Hz), 60.3 (t,  $J_{\text{C-F}}$  = 27.7 Hz).  $^{19}\text{F}$  NMR (376 MHz,  $\text{CDCl}_3$ )  $\delta$  -120.5. HRMS (ESI)  $m/z$  calcd for  $\text{C}_{10}\text{H}_6\text{BrF}_2\text{NOSNa}$   $[\text{M}+\text{Na}]^+$ : 327.9219, found 327.9213.

**(Z)-2-((2,2-difluoroethyl)imino)-6-methoxybenzo[b]thiophen-3(2H)-one**

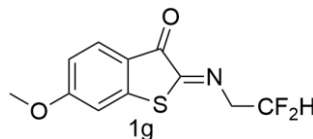

Red solid, Mp. = 123-124 °C.  $^1\text{H}$  NMR (400 MHz,  $\text{CDCl}_3$ )  $\delta$  7.83 (dd,  $J$  = 24.7, 8.6 Hz, 1H), 6.89 (d,  $J$  = 2.2 Hz, 1H), 6.83 (dd,  $J$  = 8.6, 2.2 Hz, 1H), 6.33 (tt,  $J$  = 55.6, 4.5 Hz, 1H), 4.03 – 3.90 (m, 4H), 3.89 (d,  $J$  = 4.5 Hz, 1H).  $^{13}\text{C}\{^1\text{H}\}$  NMR (101 MHz,  $\text{CDCl}_3$ )  $\delta$  182.7, 167.0, 161.9, 145.4, 129.9, 121.8, 117.0, 114.6, 113.8, 112.2 (t,  $J_{\text{C-F}}$  = 186.8 Hz), 109.6, 60.4 (t,  $J_{\text{C-F}}$  = 37.0 Hz), 56.2.  $^{19}\text{F}$  NMR (376 MHz,  $\text{CDCl}_3$ )  $\delta$  -120.5. HRMS (ESI)  $m/z$  calcd for  $\text{C}_{11}\text{H}_9\text{BrF}_2\text{NO}_2\text{SNa}$   $[\text{M}+\text{Na}]^+$ : 280.0214, found 280.0216.

**(Z)-2-((2,2-difluoroethyl)imino)-7-methylbenzo[b]thiophen-3(2H)-one**



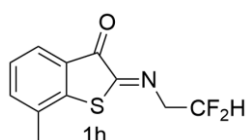

Orange solid, Mp. = 49-50°C.  $^1\text{H}$  NMR (400 MHz,  $\text{CDCl}_3$ )  $\delta$  7.77 (d,  $J = 7.6$  Hz, 1H), 7.49 (d,  $J = 7.5$  Hz, 1H), 7.29 (d,  $J = 7.6$  Hz, 1H), 6.34 (tt,  $J = 55.6, 4.5$  Hz, 1H), 3.98 (td,  $J = 14.3, 4.5$  Hz, 2H), 2.36 (s, 3H).  $^{13}\text{C}\{^1\text{H}\}$  NMR (101 MHz,  $\text{CDCl}_3$ )  $\delta$  185.2, 161.7, 142.2, 138.0, 133.9, 128.0, 126.9, 125.2, 114.6 (t,  $J_{\text{C-F}} = 241.9$  Hz), 60.5 (t,  $J_{\text{C-F}} = 27.3$  Hz), 18.8.  $^{19}\text{F}$  NMR (376 MHz,  $\text{CDCl}_3$ )  $\delta$  -120.5. HRMS (ESI)  $m/z$  calcd for  $\text{C}_{11}\text{H}_9\text{F}_2\text{NOSNa}$   $[\text{M}+\text{Na}]^+$ : 264.0265, found 264.0257.

**(Z)-2-((2,2-difluoroethyl)imino)naphtho[2,1-b]thiophen-1(2H)-one**

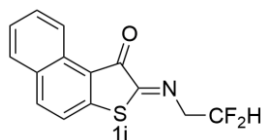

Red solid, Mp. = 70-71 °C.  $^1\text{H}$  NMR (400 MHz,  $\text{CDCl}_3$ )  $\delta$  9.16 (d,  $J = 8.5$  Hz, 1H), 8.10 (d,  $J = 8.5$  Hz, 1H), 7.86 (d,  $J = 8.2$  Hz, 1H), 7.77 – 7.70 (m, 1H), 7.56 (t,  $J = 4.1$  Hz, 1H), 7.47 (d,  $J = 8.5$  Hz, 1H), 6.37 (tt,  $J = 55.6, 4.5$  Hz, 1H), 4.00 (td,  $J = 14.3, 4.5$  Hz, 2H).  $^{13}\text{C}\{^1\text{H}\}$  NMR (101 MHz,  $\text{CDCl}_3$ )  $\delta$  184.6, 161.2, 146.9, 139.7, 138.6, 132.3, 131.6, 131.0, 130.9, 129.3, 128.9, 127.5, 127.2, 123.3, 123.0, 122.8, 122.2, 121.6, 114.6 (t,  $J_{\text{C-F}} = 325.0$  Hz), 60.5 (t,  $J_{\text{C-F}} = 37.0$  Hz).  $^{19}\text{F}$  NMR (376 MHz,  $\text{CDCl}_3$ )  $\delta$  -120.4. HRMS (ESI)  $m/z$  calcd for  $\text{C}_{14}\text{H}_9\text{F}_2\text{NOSNa}$   $[\text{M}+\text{Na}]^+$ : 300.0265, found 300.0266.

**(Z)-2-((2,2-difluoroethyl)imino)-5,7-dimethylbenzo[b]thiophen-3(2H)-one**

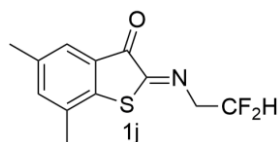

Red solid, Mp. = 93-94 °C.  $^1\text{H}$  NMR (400 MHz,  $\text{CDCl}_3$ )  $\delta$  7.52 (d,  $J = 35.0$  Hz, 1H), 7.32 (d,  $J = 11.8$  Hz, 1H), 6.34 (tt,  $J = 55.6, 4.5$  Hz, 1H), 3.95 (td,  $J = 14.3, 4.5$  Hz, 2H), 2.36 (s, 3H), 2.31 (s, 3H), 2.29 – 2.16 (m, 1H).  $^{13}\text{C}\{^1\text{H}\}$  NMR (101 MHz,  $\text{CDCl}_3$ )  $\delta$  185.3, 162.2, 140.3, 139.2, 139.1, 137.1, 133.6, 128.0, 126.1, 125.5, 114.6 (t,  $J_{\text{C-F}} = 324.8$  Hz), 60.4 (t,  $J_{\text{C-F}} = 37.0$  Hz), 20.7, 18.7.  $^{19}\text{F}$  NMR (376 MHz,  $\text{CDCl}_3$ )  $\delta$  -120.5. HRMS (ESI)  $m/z$  calcd for  $\text{C}_{12}\text{H}_{11}\text{F}_2\text{NOSNa}$   $[\text{M}+\text{Na}]^+$ : 278.0422, found 278.0422.

**(Z)-2-((2,2-difluoroethyl)imino)-4,7-dimethylbenzo[b]thiophen-3(2H)-one**

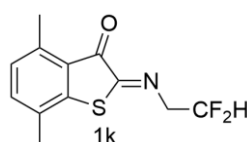

Orange solid, Mp. = 95-96 °C.  $^1\text{H}$  NMR (400 MHz,  $\text{CDCl}_3$ )  $\delta$  7.32 (d,  $J = 7.7$  Hz, 1H), 7.03 (d,  $J = 7.7$  Hz, 1H), 6.33 (tt,  $J = 55.7, 4.5$  Hz, 1H), 3.95 (td,  $J = 14.4, 4.5$  Hz, 2H), 2.65 (s, 3H), 2.31 (s, 3H).  $^{13}\text{C}\{^1\text{H}\}$  NMR (101 MHz,  $\text{CDCl}_3$ )  $\delta$  185.8, 161.6, 142.6, 140.5, 137.0, 131.0, 129.4, 125.5, 114.7 (t,  $J_{\text{C-F}} = 324.7$  Hz), 60.3 (t,  $J_{\text{C-F}} = 37.0$  Hz), 18.7, 18.5.  $^{19}\text{F}$  NMR (376 MHz,  $\text{CDCl}_3$ )  $\delta$  -120.5. HRMS (ESI)  $m/z$  calcd for  $\text{C}_{12}\text{H}_{11}\text{F}_2\text{NOSNa}$   $[\text{M}+\text{Na}]^+$ : 278.0422, found 278.0422.

## 5. General Procedure for the Synthesis of 3aa–3ka

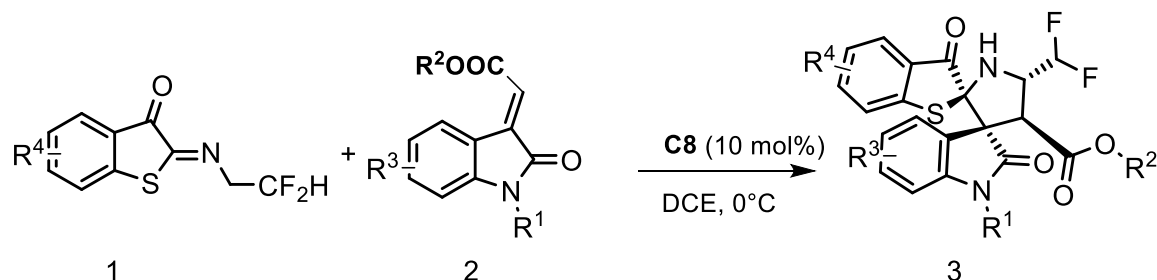

(Z)-2-((2,2-difluoroethyl)imino)benzo[b]thiophen-3(2H)-one **1a** (0.1 mmol) was added to a solution of catalyst **C8** (0.01 mmol, 10 mol%) and methyleneindolinone **2** (0.12 mmol) in anhydrous DCE (1.0 mL) at 0 °C. After completion (monitored by TLC), the

reaction mixture was directly purified by flash column chromatography on silica gel (EA:PE = 1:7(v/v)) to obtain the title compounds **3aa-3ka**.

Racemates were prepared following the general procedure with 10 mol% DABCO or a combination of equivalent cinchonidine-derived squaramide and cinchonine-derived squaramide.

## 6. General Procedure for the Synthesis of **5aa-5ak**

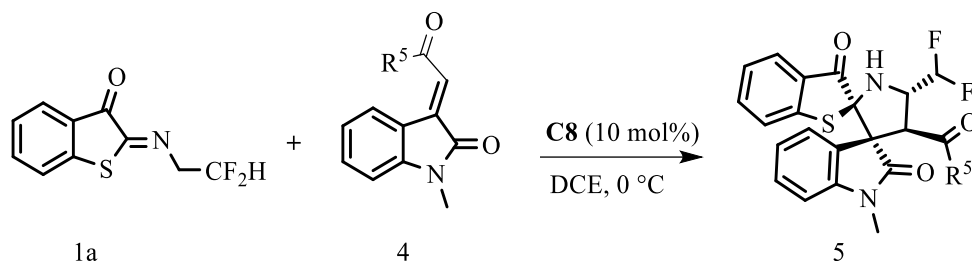

(*Z*)-2-((2,2-difluoroethyl)imino)benzo[*b*]thiophen-3(2H)-one **1a** (0.1 mmol) was added to a solution of catalyst **C8** (0.01 mmol, 10 mol% ) and methyleneindolinone **4** (0.12 mmol) in anhydrous DCE (1.0 mL) at 0 °C. After completion (monitored by TLC), the reaction mixture was directly purified by flash column chromatography on silica gel (EA:PE = 1:10(v/v)) to obtain the title compounds **5aa-5ak**.

Racemates were prepared following the general procedure with 10 mol% DABCO.

## 7. Analytical Data and HPLC Chromatogram of the Products

### Ethyl-(2*S*,3'*S*,4'*S*,5'*S*)-5'-(difluoromethyl)-1''-methyl-2'',3-dioxo-3H-dispiro[benzo[*b*]thiophene-2,2'-pyrrolidine-3',3''-indoline]-4'-carboxylate

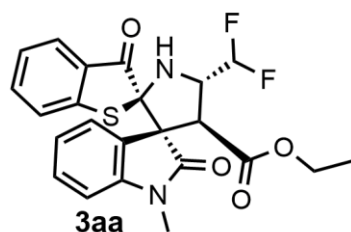

From 22.7 mg (0.1 mmol) of (*Z*)-2-((2,2-difluoroethyl)imino)benzo[*b*]thiophen-3(2H)-one **1a** and 27.7 mg (0.12 mmol, 1.2 equiv) of methyleneindolinone **2a**, 43.5 mg (95% yield) of compound **3aa** was obtained as a white solid,  $[\alpha]_D^{24} = -372$  ( $c = 1.0$ , CHCl<sub>3</sub>), Mp. = 184-185 °C. Dr (> 20:1) was determined by HPLC analysis. 98% ee was determined by HPLC analysis (Daicel Chiralpak IA column, 230 nm, hexane/2-propanol 50:50, 1.0 mL/min). Retention time:  $t_{\text{major}} = 9.6$  min,  $t_{\text{minor}} = 7.7$  min. <sup>1</sup>H NMR (400 MHz, CDCl<sub>3</sub>) δ 7.73 (dd,  $J = 7.7, 0.7$  Hz, 1H), 7.49 – 7.32 (m, 3H), 7.22 – 7.08 (m, 2H), 7.01 (d,  $J = 7.9$  Hz, 1H), 6.85 (d,  $J = 7.8$  Hz, 1H), 6.59 (ddd,  $J = 58.2, 56.7, 7.1$  Hz, 1H), 4.75 – 4.42 (m, 1H), 4.30 (d,  $J = 8.1$  Hz, 1H), 3.80 (dq,  $J = 10.8, 7.1$  Hz, 1H), 3.69 (dq,  $J = 10.8, 7.1$  Hz, 1H), 3.10 (s, 3H), 2.75 (s, 1H), 0.74 (t,  $J = 7.1$  Hz, 3H). <sup>13</sup>C{<sup>1</sup>H} NMR (101 MHz, CDCl<sub>3</sub>) δ 202.4, 171.5, 167.6, 147.8, 144.1, 136.4, 129.9, 128.8, 128.4, 127.3, 125.6, 124.2, 123.2, 123.2, 117.5 (dd,  $J_{\text{C-F}} = 330.9, 323.6$  Hz), 108.1, 86.6, 62.5, 61.0, 59.6 (dd,  $J_{\text{C-F}} = 38.2, 32.5$  Hz), 49.8, 49.7, 26.7, 13.6. <sup>19</sup>F NMR (376 MHz, CDCl<sub>3</sub>) δ -119.3 (d,  $J = 296.3$  Hz, 1F), -123.0 (d,  $J = 295.9$  Hz, 1F). HRMS (ESI)  $m/z$  calcd for C<sub>23</sub>H<sub>20</sub>F<sub>2</sub>N<sub>2</sub>NaO<sub>4</sub>S [M+Na]<sup>+</sup>: 481.1004, found 481.1004.

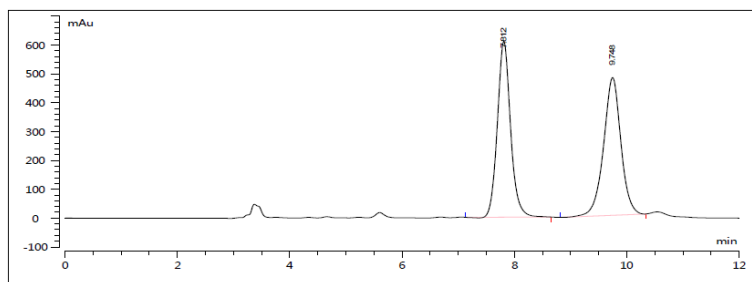

| No | Retention Time | Area      | % Area | Int Type |
|----|----------------|-----------|--------|----------|
| 1  | 7.812          | 9940.090  | 49.301 | BB       |
| 2  | 9.748          | 10221.984 | 50.699 | BB       |

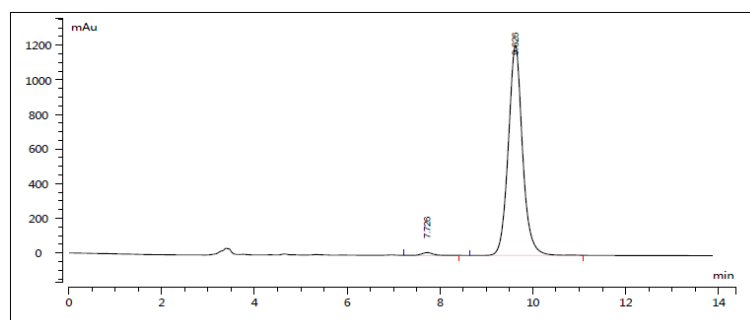

| No | Retention Time | Area      | % Area | Int Type |
|----|----------------|-----------|--------|----------|
| 1  | 7.726          | 256.961   | 0.987  | BB       |
| 2  | 9.626          | 25769.543 | 99.013 | BB       |

### Ethyl-(2*S*,3'*S*,4'*S*,5'*S*)-5'-(difluoromethyl)-2'',3-dioxo-3*H*-dispiro[benzo[*b*]thiophene-2,2'-pyrrolidine-3',3''-indoline]-4'-carboxylate

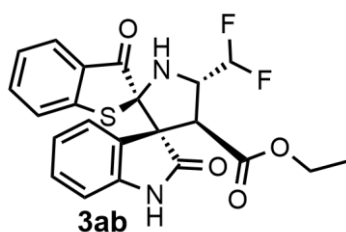

From 22.7 mg (0.1 mmol) of (*Z*)-2-((2,2-difluoroethyl)imino)benzo[*b*]thiophen-3(2*H*)-one **1a** and 26.0 mg (0.12 mmol, 1.2 equiv) of methyleneindolinone **2b**, 35.5 mg (80% yield) of compound **3ab** was obtained as a red solid,  $[\alpha]_D^{24} = -372$  ( $c = 1.0$ ,  $\text{CHCl}_3$ ), Mp. = 148–149 °C. Dr (> 20:1) was determined by HPLC analysis. 64% ee was determined by HPLC analysis (Daicel

Chiralpak IA column, 230 nm, hexane/2-propanol 50:50, 1.0 mL/min). Retention time:  $t_{\text{major}} = 9.1$  min,  $t_{\text{minor}} = 7.3$  min.  $^1\text{H}$  NMR (400 MHz, DMSO)  $\delta$  10.70 (s, 1H), 7.63 (d,  $J = 7.7$  Hz, 1H), 7.61 – 7.51 (m, 1H), 7.39 (d,  $J = 7.5$  Hz, 1H), 7.27 (ddd,  $J = 15.7, 11.0, 4.2$  Hz, 3H), 7.07 – 6.99 (m, 1H), 6.84 (d,  $J = 7.6$  Hz, 1H), 6.42 (td,  $J = 57.6, 7.0$  Hz, 1H), 5.00 (d,  $J = 5.3$  Hz, 1H), 4.39 (d,  $J = 7.3$  Hz, 1H), 4.08 (d,  $J = 8.3$  Hz, 1H), 3.77 (dq,  $J = 10.9, 7.1$  Hz, 1H), 3.65 (dq,  $J = 10.9, 7.1$  Hz, 1H), 0.64 (t,  $J = 7.1$  Hz, 3H).  $^{13}\text{C}\{^1\text{H}\}$  NMR (101 MHz, DMSO)  $\delta$  201.6, 172.7, 167.5, 147.6, 142.5, 136.5, 129.6, 128.6, 128.6, 126.5, 125.4, 124.2, 123.5, 121.8, 117.80 (t,  $J_{\text{C-F}} = 325.9$  Hz), 109.6, 85.7, 79.1, 62.9, 60.6, 59.9, 59.6, 59.4, 49.7, 49.6, 13.1.  $^{19}\text{F}$  NMR (376 MHz, DMSO)  $\delta$  -117.0 (d,  $J = 287.2$  Hz, 1F), -122.0 (d,  $J = 287.2$  Hz, 1F). HRMS (ESI)  $m/z$  calcd for  $\text{C}_{22}\text{H}_{18}\text{F}_2\text{N}_2\text{NaO}_4\text{S} [\text{M}+\text{Na}]^+$ : 467.0848, found 467.0848.

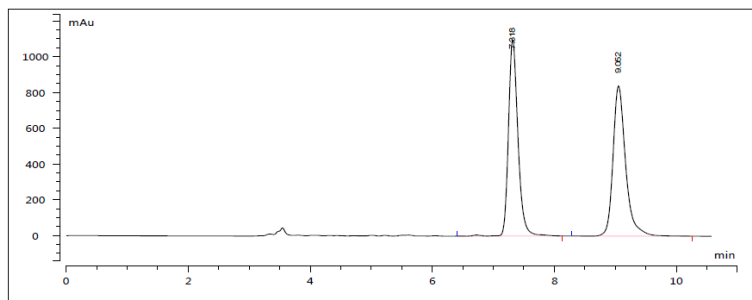

| No | Retention Time | Area      | % Area | Int Type |
|----|----------------|-----------|--------|----------|
| 1  | 7.318          | 11834.406 | 49.528 | BB       |
| 2  | 9.052          | 12060.157 | 50.472 | BB       |

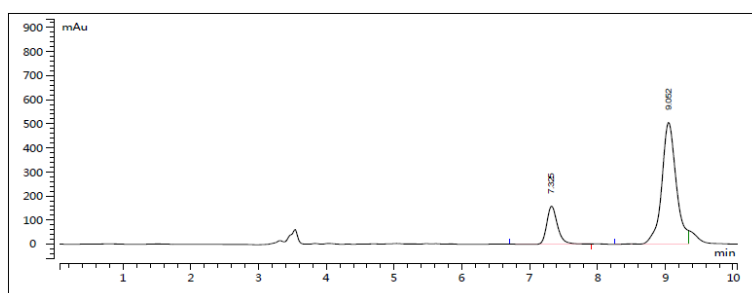

| No | Retention Time | Area     | % Area | Int Type |
|----|----------------|----------|--------|----------|
| 1  | 7.325          | 1665.017 | 18.132 | BB       |
| 2  | 9.052          | 7517.907 | 81.868 | BB       |

### Ethyl-(2*S*,3'*S*,4'*S*,5'*S*)-1''-benzyl-5'-(difluoromethyl)-2'',3-dioxo-3*H*-dispiro[benzo[*b*]thiophene-2,2'-pyrrolidine-3',3''-indoline]-4'-carboxylate

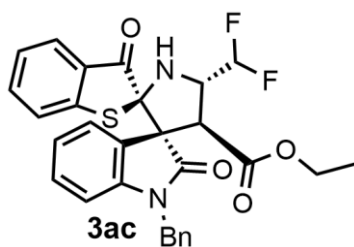

From 22.7 mg (0.1 mmol) of (*Z*)-2-((2,2-difluoroethyl)imino)benzo[*b*]thiophen-3(2*H*)-one **1a** and 27.7 mg (0.12 mmol, 1.2 equiv) of methyleneindolinone **2c**, 44.3 mg (83% yield) of compound **3ac** was obtained as a yellow solid,  $[\alpha]_D^{25} = -456$  ( $c = 1.0$ ,  $\text{CHCl}_3$ ), Mp. = 189-190 °C. Dr (> 20:1) was determined by HPLC analysis. 98% ee was determined by HPLC analysis

(Daicel Chiralpak IA column, 230 nm, hexane/2-propanol 60:40, 1.0 mL/min). Retention time:  $t_{\text{major}} = 19.8$  min,  $t_{\text{minor}} = 18.3$  min.  $^1\text{H}$  NMR (400 MHz,  $\text{CDCl}_3$ )  $\delta$  7.75 (d,  $J = 7.7$  Hz, 1H), 7.54 – 7.44 (m, 1H), 7.39 (d,  $J = 7.4$  Hz, 1H), 7.30 – 7.22 (m, 1H), 7.20 – 7.04 (m, 5H), 7.01 (dd,  $J = 6.9, 4.8$  Hz, 3H), 6.82 – 6.45 (m, 2H), 5.03 (d,  $J = 15.5$  Hz, 1H), 4.66 – 4.52 (m, 1H), 4.38 (dd,  $J = 71.2, 11.8$  Hz, 1H), 3.78 (dq,  $J = 10.8, 7.1$  Hz, 1H), 3.60 (dq,  $J = 10.8, 7.1$  Hz, 1H), 2.76 (s, 1H), 0.59 (t,  $J = 7.1$  Hz, 3H).  $^{13}\text{C}\{^1\text{H}\}$  NMR (101 MHz,  $\text{CDCl}_3$ )  $\delta$  202.6, 171.7, 167.6, 147.6, 143.3, 136.3, 135.3, 129.8, 129.0, 128.6, 128.6, 127.6, 127.4, 127.3, 125.7, 124.2, 123.2, 123.1, 117.61 (dd,  $J_{\text{C-F}} = 331.0, 323.6$  Hz), 109.0, 87.4, 62.5, 61.1, 59.72 (dd,  $J_{\text{C-F}} = 38.1, 32.5$  Hz), 49.5, 49.5, 44.1, 13.4.  $^{19}\text{F}$  NMR (376 MHz,  $\text{CDCl}_3$ )  $\delta$  -119.4 (d,  $J = 295.9$  Hz, 1F), -123.1 (d,

$J = 295.9$  Hz, 1F). HRMS (ESI)  $m/z$  calcd for  $C_{29}H_{24}F_2N_2NaO_4S$   $[M+Na]^+$ : 557.1317, found 557.1317.

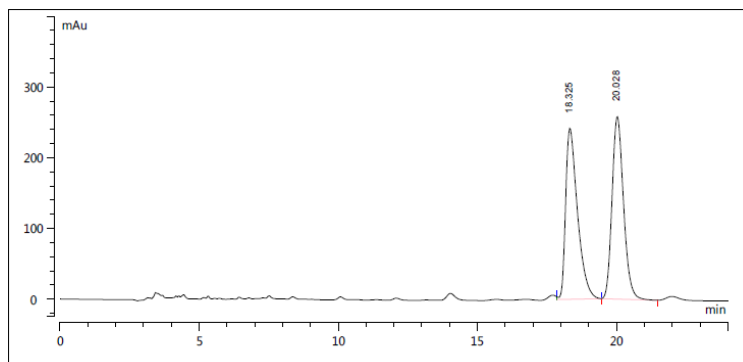

| No | Retention Time | Area     | % Area | Int Type |
|----|----------------|----------|--------|----------|
| 1  | 18.325         | 7152.158 | 49.157 | BB       |
| 2  | 20.028         | 7397.369 | 50.843 | BB       |

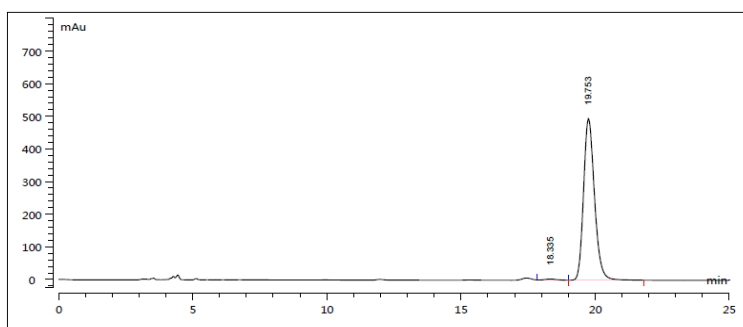

| No | Retention Time | Area      | % Area | Int Type |
|----|----------------|-----------|--------|----------|
| 1  | 18.335         | 85.225    | 0.606  | BB       |
| 2  | 19.753         | 13983.541 | 99.394 | BB       |

**1''-(tert-butyl) 4'-ethyl (2*S*,3'*S*,4'*S*,5'*S*)-5'-(difluoromethyl)-2'',3-dioxo-3H-dispiro[benzo[*b*]thiophene-2,2'-pyrrolidine-3',3''-indoline]-1'',4'-dicarboxylate**

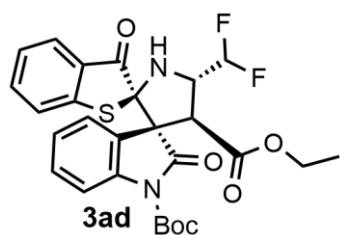

From 22.7 mg (0.1 mmol) of (*Z*)-2-((2,2-difluoroethyl)imino)benzo[*b*]thiophen-3(2*H*)-one **1a** and 38.0 mg (0.12 mmol, 1.2 equiv) of methyleneindolinone **2d**, 45.7 mg (84% yield) of compound **3ad** was obtained as a yellow solid,  $[\alpha]_D^{25} = -221$  ( $c = 1.0$ ,  $CHCl_3$ ),  $Mp. = 65-66$  °C.  $Dr (> 20:1)$  was determined by HPLC analysis.

92% ee was determined by HPLC analysis (Daicel Chiralpak IA column, 230 nm, hexane/2-propanol 10:90, 1.0 mL/min). Retention time:  $t_{major} = 12.8$  min,  $t_{minor} = 9.7$  min.  $^1H$  NMR (400 MHz,  $CDCl_3$ )  $\delta$  7.85 (d,  $J = 8.1$  Hz, 1H), 7.72 (d,  $J = 7.6$  Hz, 1H), 7.50 – 7.39 (m, 3H), 7.29 – 7.15 (m, 2H), 7.03 (d,  $J = 7.9$  Hz, 1H), 6.60 (td,  $J = 57.9$ , 7.0 Hz, 1H), 4.57 – 4.45 (m, 1H), 4.30 (d,  $J = 8.1$  Hz, 1H), 3.84 – 3.76 (m, 1H), 3.72 (ddd,  $J = 14.3$ , 10.7, 7.1 Hz, 1H), 2.75 (s, 1H), 1.49 (s, 9H), 0.77 (t,  $J = 7.1$  Hz, 3H).  $^{13}C\{^1H\}$  NMR (101 MHz,  $CDCl_3$ )  $\delta$  202.1, 170.3, 167.3, 148.6, 147.9, 140.3, 136.4,

130.1, 128.7, 127.5, 127.2, 125.6, 125.0, 123.9, 123.3, 117.3 (dd,  $J_{C-F} = 331.3, 323.7$  Hz), 114.9, 87.3, 84.6, 62.9, 61.3, 59.4 (dd,  $J_{C-F} = 38.4, 32.9$  Hz), 50.6, 50.5, 27.9, 13.3.  $^{19}\text{F}$  NMR (376 MHz,  $\text{CDCl}_3$ )  $\delta$  -119.3 (d,  $J = 296.7$  Hz, 1F), -123.0 (d,  $J = 296.7$  Hz, 1F). HRMS (ESI)  $m/z$  calcd for  $\text{C}_{27}\text{H}_{26}\text{F}_2\text{N}_2\text{NaO}_6\text{S}$   $[\text{M}+\text{Na}]^+$ : 567.1372, found 567.1372.

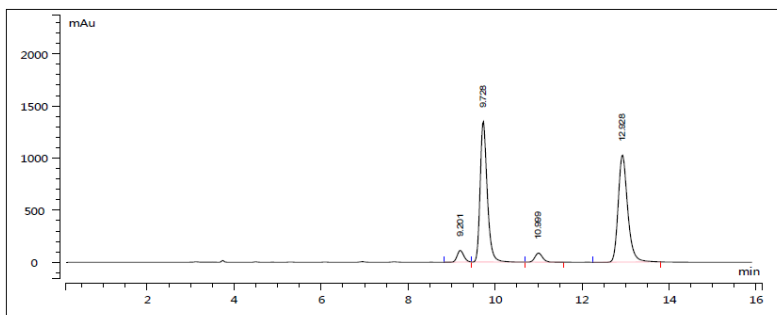

| No | Retention Time | Area      | % Area | Int Type |
|----|----------------|-----------|--------|----------|
| 1  | 9.201          | 1180.207  | 3.582  | BB       |
| 2  | 9.728          | 15242.273 | 46.266 | BB       |
| 3  | 10.999         | 1056.738  | 3.208  | BB       |
| 4  | 12.928         | 15465.998 | 46.945 | BB       |

| No | Retention Time | Area      | % Area | Int Type |
|----|----------------|-----------|--------|----------|
| 1  | 9.728          | 15242.273 | 49.636 | BB       |
| 2  | 12.928         | 15465.998 | 50.364 | BB       |

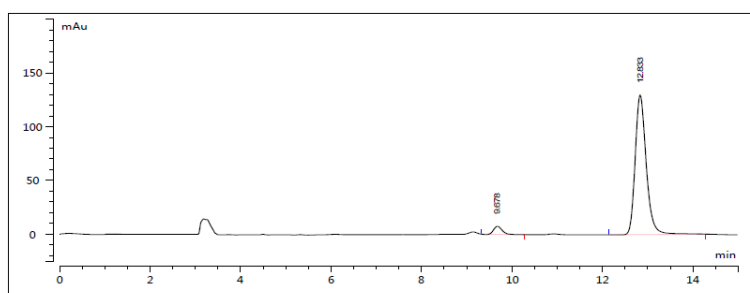

| No | Retention Time | Area     | % Area | Int Type |
|----|----------------|----------|--------|----------|
| 1  | 9.678          | 91.502   | 3.985  | BB       |
| 2  | 12.833         | 2204.886 | 96.015 | BB       |

**Methyl-(2*S*,3'*S*,4'*S*,5'*S*)-5'-(difluoromethyl)-1''-methyl-2'',3-dioxo-3*H*-dispiro[benzo[*b*]thiophene-2,2'-pyrrolidine-3',3''-indoline]-4'-carboxylate**

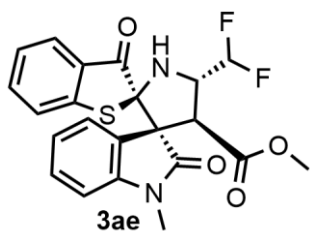

From 22.7 mg (0.1 mmol) of (*Z*)-2-((2,2-difluoroethyl)imino)benzo[*b*]thiophen-3(2*H*)-one **1a** and 26.0 mg (0.12 mmol, 1.2 equiv) of methyleneindolinone **2e**, 37.3 mg (84% yield) of compound **3ae** was obtained as a white solid,  $[\alpha]_D^{25} = -181$  ( $c = 1.0, \text{CHCl}_3$ ),  $\text{Mp.} = 181\text{-}182$  °C. Dr ( $> 20:1$ ) was determined by HPLC analysis. 96% ee was determined by HPLC analysis (Daicel Chiralpak IA column, 230 nm, hexane/2-propanol 60:40, 1.0

mL/min). Retention time:  $t_{\text{major}} = 11.9$  min,  $t_{\text{minor}} = 10.6$  min.  $^1\text{H NMR}$  (400 MHz,  $\text{CDCl}_3$ )  $\delta$  7.73 (d,  $J = 7.7$  Hz, 1H), 7.42 (qd,  $J = 7.7, 1.1$  Hz, 3H), 7.23 – 7.07 (m, 2H), 7.01 (d,  $J = 7.9$  Hz, 1H), 6.86 (d,  $J = 7.8$  Hz, 1H), 6.58 (ddd,  $J = 58.1, 56.7, 7.1$  Hz, 1H), 4.68 – 4.39 (m, 1H), 4.30 (d,  $J = 8.1$  Hz, 1H), 3.25 (s, 3H), 3.11 (s, 3H), 2.76 (s, 1H).  $^{13}\text{C}\{^1\text{H}\}$  NMR (101 MHz,  $\text{CDCl}_3$ )  $\delta$  202.4, 171.4, 168.2, 147.8, 143.9, 136.4, 130.0, 128.8, 128.3, 127.3, 125.6, 124.2, 123.2, 123.2, 117.4 (dd,  $J_{\text{C-F}} = 330.7, 323.9$  Hz), 108.1, 86.4, 62.6, 59.6 (dd,  $J_{\text{C-F}} = 38.4, 32.5$  Hz), 52.2, 50.0, 49.9, 26.7.  $^{19}\text{F NMR}$  (376 MHz,  $\text{CDCl}_3$ )  $\delta$  -119.3 (d,  $J = 296.3$  Hz, 1F), -123.0 (d,  $J = 295.9$  Hz, 1F). HRMS (ESI)  $m/z$  calcd for  $\text{C}_{22}\text{H}_{18}\text{F}_2\text{N}_2\text{NaO}_4\text{S}$   $[\text{M}+\text{Na}]^+$ : 467.0848, found 467.0848.

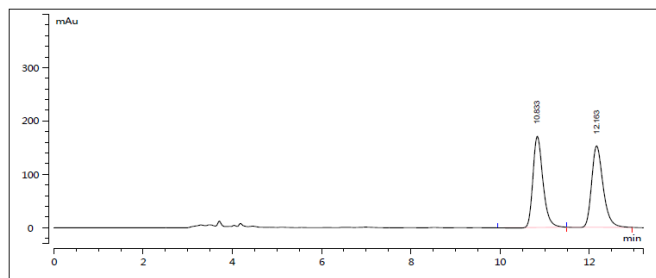

| No | Retention Time | Area     | % Area | Int Type |
|----|----------------|----------|--------|----------|
| 1  | 10.833         | 2652.156 | 49.459 | BB       |
| 2  | 12.163         | 2710.222 | 50.541 | BB       |

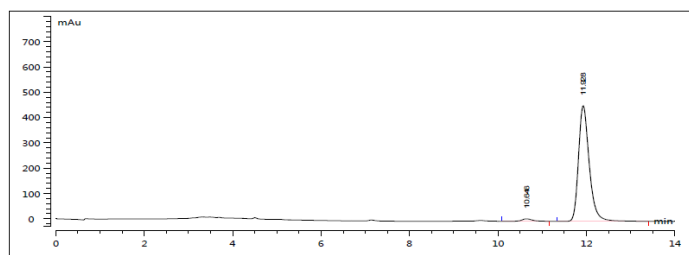

| No | Retention Time | Area     | % Area | Int Type |
|----|----------------|----------|--------|----------|
| 1  | 10.646         | 148.374  | 1.893  | BB       |
| 2  | 11.928         | 7688.807 | 98.107 | BB       |

***Iso*-propyl-(2*S*,3'*S*,4'*S*,5'*S*)-5'-(difluoromethyl)-1''-methyl-2'',3-dioxo-3*H*-dispiro[benzo[*b*]thiophene-2,2'-pyrrolidine-3',3''-indoline]-4'-carboxylate**

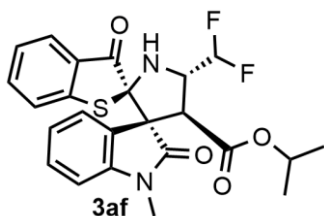

From 22.7 mg (0.1 mmol) of (*Z*)-2-((2,2-difluoroethyl)imino)benzo[*b*]thiophen-3(2*H*)-one **1a** and 29.4 mg (0.12 mmol, 1.2 equiv) of methyleneindolinone **2f**, 40.6 mg (86% yield) of compound **3af** was obtained as a white solid,  $[\alpha]_{\text{D}}^{24} = -366$  ( $c = 1.0$ ,  $\text{CHCl}_3$ ), Mp. = 86-87 °C. Dr ( $> 20:1$ ) was determined by HPLC analysis. 96% ee was determined by HPLC analysis (Daicel Chiralpak IA column, 230 nm, hexane/2-propanol 60:40, 1.0 mL/min). Retention time:  $t_{\text{major}} = 11.8$  min,  $t_{\text{minor}} = 9.0$  min.  $^1\text{H NMR}$  (400 MHz,  $\text{CDCl}_3$ )  $\delta$  7.73 (dd,  $J = 7.7, 0.7$  Hz, 1H), 7.55 – 7.31 (m, 3H), 7.15 (ddd,  $J = 15.1, 7.7, 0.8$  Hz, 2H), 7.00 (d,  $J = 7.9$  Hz, 1H), 6.84 (d,  $J = 7.8$  Hz, 1H), 6.59 (ddd,  $J = 58.2, 56.7, 7.1$  Hz, 1H), 4.61 (dt,  $J = 12.5, 6.3$  Hz, 1H), 4.53 (dt,  $J = 16.3, 6.0$  Hz, 1H), 4.28 (d,  $J = 8.1$  Hz,

1H), 3.10 (s, 3H), 2.74 (s, 1H), 0.97 (d,  $J = 6.3$  Hz, 3H), 0.56 (d,  $J = 6.2$  Hz, 3H).  $^{13}\text{C}\{^1\text{H}\}$  NMR (101 MHz,  $\text{CDCl}_3$ )  $\delta$  202.4, 171.5, 167.0, 147.8, 144.3, 136.3, 129.9, 128.9, 128.5, 127.3, 125.6, 124.2, 123.2, 123.1, 117.5 (dd,  $J_{\text{C-F}} = 331.3, 323.5$  Hz), 115.1, 108.1, 86.6, 68.7, 62.4, 59.6 (dd,  $J_{\text{C-F}} = 38.2, 32.3$  Hz), 49.8, 49.7, 26.6, 21.5, 20.8.  $^{19}\text{F}$  NMR (376 MHz,  $\text{CDCl}_3$ )  $\delta$  -119.3 (d,  $J = 295.9$  Hz, 1F), -123.0 (d,  $J = 295.6$  Hz, 1F). HRMS (ESI)  $m/z$  calcd for  $\text{C}_{24}\text{H}_{22}\text{F}_2\text{N}_2\text{NaO}_4\text{S}$   $[\text{M}+\text{Na}]^+$ : 495.1161, found 495.1161.

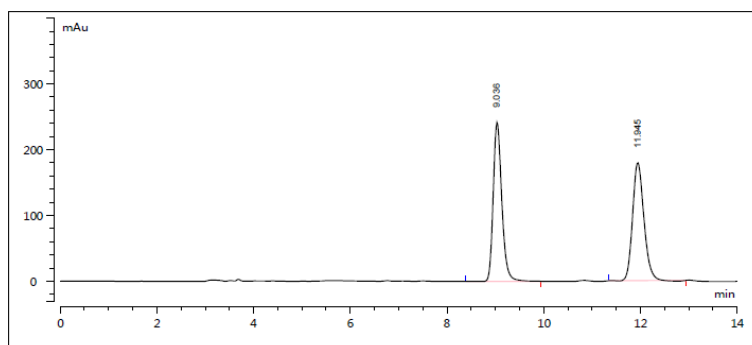

| No | Retention Time | Area     | % Area | Int Type |
|----|----------------|----------|--------|----------|
| 1  | 9.036          | 2981.291 | 50.749 | BB       |
| 2  | 11.945         | 2893.305 | 49.251 | BB       |

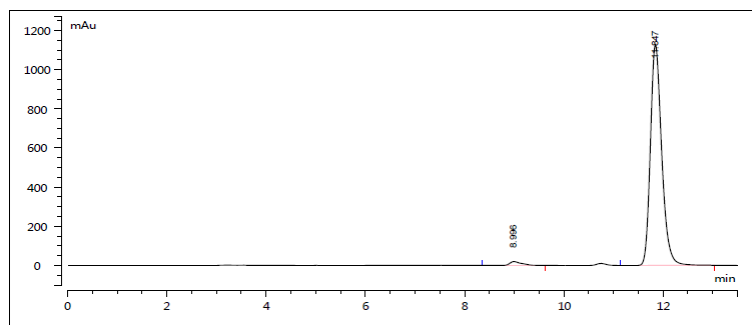

| No | Retention Time | Area      | % Area | Int Type |
|----|----------------|-----------|--------|----------|
| 1  | 8.996          | 319.077   | 1.760  | BB       |
| 2  | 11.847         | 17810.752 | 98.240 | BB       |

***Tert*-buty-(2*S*,3'*S*,4'*S*,5'*S*)-5'-(difluoromethyl)-1''-methyl-2'',3-dioxo-3H-dispiro[benzo[*b*]thiophene-2,2'-pyrrolidine-3',3''-indoline]-4'-carboxylate**

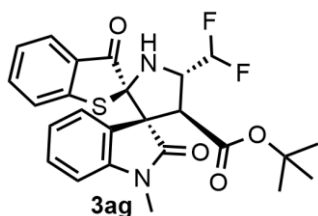

From 22.7 mg (0.1 mmol) of (*Z*)-2-((2,2-difluoroethyl)imino)benzo[*b*]thiophen-3(2H)-one **1a** and 31.0 mg (0.12 mmol, 1.2 equiv) of methyleneindolinone **2g**, 41.3 mg (85% yield) of compound **3ag** was obtained as a yellow solid,  $[\alpha]_{\text{D}}^{24} = -338$  ( $c = 1.0$ ,  $\text{CHCl}_3$ ), Mp. = 207-208 °C. Dr (> 20:1) was determined by HPLC analysis. 96% ee was determined by HPLC analysis (Daicel Chiralpak IA column, 230 nm, hexane/2-propanol 60:40, 1.0 mL/min). Retention time:  $t_{\text{major}} = 7.1$  min,  $t_{\text{minor}} = 9.6$  min.  $^1\text{H}$  NMR (400 MHz,  $\text{CDCl}_3$ )  $\delta$  7.72 (dd,  $J = 7.7, 0.6$  Hz, 1H), 7.56 – 7.28 (m, 3H), 7.22 – 7.08 (m, 2H), 7.00 (d,  $J = 7.9$  Hz, 1H), 6.87 (d,  $J = 7.5$  Hz, 1H), 6.59 (ddd,  $J = 58.3, 56.7, 7.1$  Hz, 1H), 4.49 (td,  $J = 12.2, 7.1$  Hz, 1H), 4.24 (d,  $J = 8.1$  Hz, 1H), 3.10 (s, 3H), 2.72



(s, 1H), 0.97 (s, 9H).  $^{13}\text{C}\{^1\text{H}\}$  NMR (101 MHz,  $\text{CDCl}_3$ )  $\delta$  202.4, 171.6, 166.5, 147.8, 144.3, 136.3, 129.8, 128.9, 128.9, 127.3, 125.6, 124.2, 123.2, 123.1, 119.9, 117.5 (dd,  $J_{\text{C-F}} = 331.3, 323.1$  Hz) 107.9, 86.8, 81.7, 62.4, 59.6 (dd,  $J_{\text{C-F}} = 38.2, 32.1$  Hz), 50.2, 50.2, 26.6.  $^{19}\text{F}$  NMR (376 MHz,  $\text{CDCl}_3$ )  $\delta$  -119.3 (d,  $J = 295.2$  Hz, 1F), -123.0 (d,  $J = 295.6$  Hz, 1F). HRMS (ESI)  $m/z$  calcd for  $\text{C}_{25}\text{H}_{24}\text{F}_2\text{N}_2\text{NaO}_4\text{S}$   $[\text{M}+\text{Na}]^+$ : 509.1317, found 509.1317.

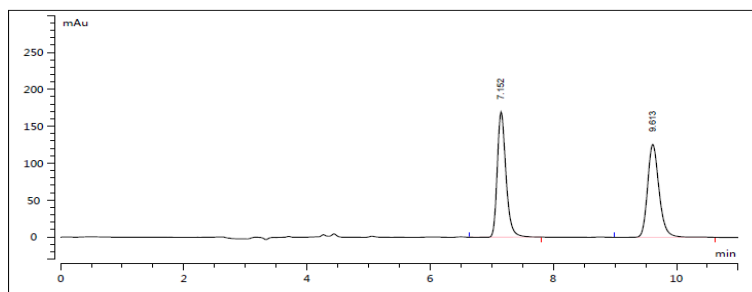

| No | Retention Time | Area     | % Area | Int Type |
|----|----------------|----------|--------|----------|
| 1  | 7.152          | 1658.059 | 50.394 | BB       |
| 2  | 9.613          | 1632.158 | 49.606 | BB       |

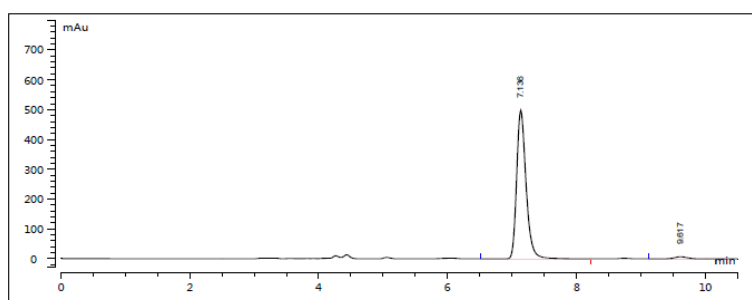

| No | Retention Time | Area     | % Area | Int Type |
|----|----------------|----------|--------|----------|
| 1  | 7.136          | 5059.279 | 98.056 | BB       |
| 2  | 9.617          | 100.277  | 1.944  | BB       |

**Ethyl-(2*S*,3'*S*,4'*S*,5'*S*)-4'-chloro-5'-(difluoromethyl)-1'-methyl-2'',3-dioxo-3H-dispiro[benzo[*b*]thiophene-2,2'-pyrrolidine-3',3''-indoline]-4'-carboxylate**

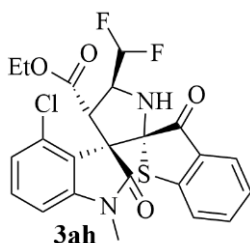

From 22.7 mg (0.1 mmol) of (*Z*)-2-((2,2-difluoroethyl)imino) benzo[*b*]thiophen-3(2H)-one **1a** and 40.1 mg (0.12 mmol, 1.2 equiv) of methyleneindolinone **2h**, 40.3 mg (82% yield) of compound **3ah** was obtained as a white solid,  $[\alpha]_{\text{D}}^{24} = -374$  ( $c = 1.0, \text{CHCl}_3$ ), Mp. = 92-93 °C. Dr (> 20:1) was determined by HPLC analysis. 99% ee was determined by HPLC analysis (Daicel Chiralpak IA column, 230 nm, hexane/2-propanol 50:50, 1.0 mL/min). Retention time:  $t_{\text{major}} = 11.8$  min,  $t_{\text{minor}} = 7.1$  min.  $^1\text{H}$  NMR (400 MHz,  $\text{CDCl}_3$ )  $\delta$  7.72 (d,  $J = 7.6$  Hz, 1H), 7.52 – 7.42 (m, 1H), 7.35 (d,  $J = 8.0$  Hz, 1H), 7.18 (t,  $J = 7.5$  Hz, 1H), 7.11 (dd,  $J = 8.0, 1.7$  Hz, 1H), 7.02 (d,  $J = 7.9$  Hz, 1H), 6.85 (d,  $J = 1.6$  Hz, 1H), 6.76 – 6.39 (m, 1H), 4.59 – 4.42 (m, 1H), 4.28 (d,  $J = 8.1$  Hz, 1H), 3.83

(dq,  $J = 10.9, 7.1$  Hz, 1H), 3.74 (dq,  $J = 10.8, 7.1$  Hz, 1H), 3.08 (s, 3H), 2.74 (s, 1H), 0.81 (t,  $J = 7.1$  Hz, 3H).  $^{13}\text{C}\{^1\text{H}\}$  NMR (101 MHz,  $\text{CDCl}_3$ )  $\delta$  202.2, 171.5, 167.4, 147.6, 145.3, 136.5, 135.9, 128.7, 127.3, 126.7, 125.7, 125.2, 123.3, 123.0, 117.3 (dd,  $J_{\text{C-F}} = 331.3, 323.7$  Hz), 108.9, 86.4, 62.2, 61.2, 59.46 (dd,  $J_{\text{C-F}} = 38.2, 32.6$  Hz), 49.6, 49.6, 26.8, 13.7.  $^{19}\text{F}$  NMR (376 MHz,  $\text{CDCl}_3$ )  $\delta$  -119.3 (d,  $J = 296.7$  Hz, 1F), -122.9 (d,  $J = 297.1$  Hz, 1F). HRMS (ESI)  $m/z$  calcd for  $\text{C}_{23}\text{H}_{19}\text{ClF}_2\text{N}_2\text{NaO}_4\text{S}$   $[\text{M}+\text{Na}]^+$ : 515.0614, found 515.0614.

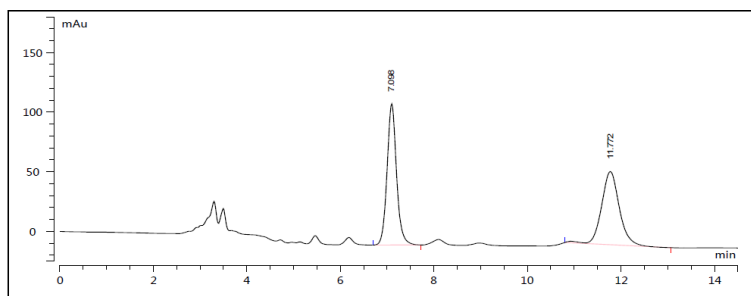

| No | Retention Time | Area     | % Area | Int Type |
|----|----------------|----------|--------|----------|
| 1  | 7.098          | 1670.867 | 50.924 | BB       |
| 2  | 11.772         | 1610.211 | 49.076 | BB       |

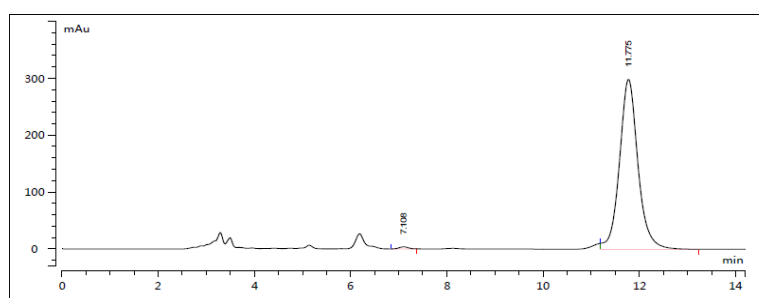

| No | Retention Time | Area     | % Area | Int Type |
|----|----------------|----------|--------|----------|
| 1  | 7.108          | 47.384   | 0.592  | BB       |
| 2  | 11.775         | 7956.463 | 99.408 | BB       |

**Ethyl-(2*S*,3'*S*,4*S*,5'*S*)-5'-(difluoromethyl)-5''-fluoro-1''-methyl-2'',3-dioxo-3*H*-dispiro[benzo[*b*]thiophene-2,2'-pyrrolidine-3',3''-indoline]-4'-carboxylate**

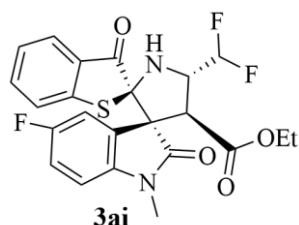

From 22.7 mg (0.1 mmol) of (Z)-2-((2,2-difluoroethyl)imino)benzo[*b*]thiophen-3(2*H*)-one **1a** and 29.9 mg (0.12 mmol, 1.2 equiv) of methyleneindolinone **2i**, 41.8 mg (88% yield) of compound **3ai** was obtained as a white solid,  $[\alpha]_{\text{D}}^{24} = -373$  ( $c = 1.0$ ,  $\text{CHCl}_3$ ), Mp. = 138-139 °C. Dr ( $> 20:1$ ) was determined by HPLC analysis. 99% ee was determined by HPLC analysis (Daicel Chiralpak IA column, 230 nm, hexane/2-propanol 84:16, 1.0 mL/min). Retention time:  $t_{\text{major}} = 23.4$  min,  $t_{\text{minor}} = 16.8$  min.  $^1\text{H}$  NMR (400 MHz,  $\text{CDCl}_3$ )  $\delta$  7.73 (dd,  $J = 7.7, 0.7$  Hz, 1H), 7.45 (td,  $J = 7.9, 1.3$  Hz, 1H), 7.24 – 7.15 (m, 2H), 7.10 (td,  $J = 8.8, 2.6$  Hz, 1H), 7.03 (d,  $J = 7.9$  Hz, 1H), 6.78 (dd,  $J = 8.5, 4.1$  Hz, 1H), 6.60 (ddd,  $J = 58.2, 56.7, 7.1$  Hz, 1H), 4.57 – 4.43 (m, 1H), 4.29 (d,  $J = 8.1$  Hz, 1H), 3.84

(dq,  $J = 10.8, 7.1$  Hz, 1H), 3.74 (dq,  $J = 10.8, 7.1$  Hz, 1H), 3.09 (s, 3H), 2.72 (s, 1H), 0.79 (t,  $J = 7.1$  Hz, 3H).  $^{13}\text{C}\{^1\text{H}\}$  NMR (101 MHz,  $\text{CDCl}_3$ )  $\delta$  202.2, 171.2, 167.4, 160.4, 158.0, 147.6, 140.2, 140.2, 136.5, 129.7, 129.7, 128.8, 127.3, 125.7, 117.3 (dd,  $J_{\text{C-F}} = 331.4, 323.6$  Hz), 116.3, 116.0, 112.9, 112.6, 108.6, 108.5, 86.3, 62.8, 61.1, 59.4 (dd,  $J_{\text{C-F}} = 38.4, 32.7$  Hz), 49.6, 49.5, 26.8, 13.6.  $^{19}\text{F}$  NMR (376 MHz,  $\text{CDCl}_3$ )  $\delta$  -118.8, -119.3 (d,  $J = 297.1$  Hz, 1F), -122.9 (d,  $J = 297.1$  Hz, 1F). HRMS (ESI)  $m/z$  calcd for  $\text{C}_{23}\text{H}_{19}\text{F}_3\text{N}_2\text{NaO}_4\text{S}$   $[\text{M}+\text{Na}]^+$ : 499.0910, found 499.0910.

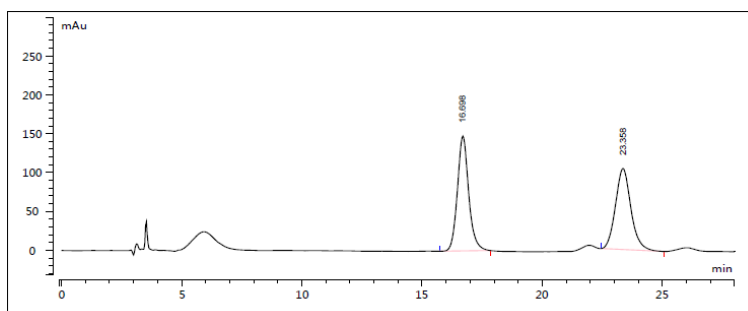

| No | Retention Time | Area     | % Area | Int Type |
|----|----------------|----------|--------|----------|
| 1  | 16.698         | 4805.330 | 50.825 | BB       |
| 2  | 23.358         | 4649.321 | 49.175 | BB       |

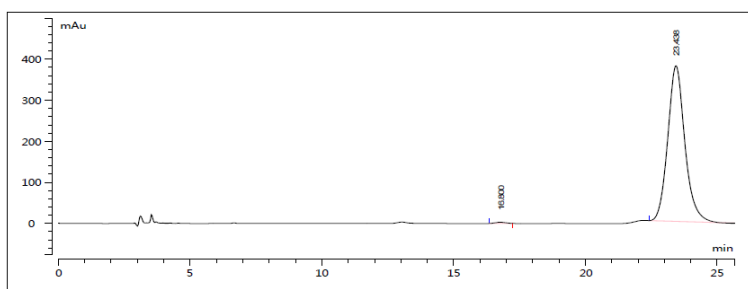

| No | Retention Time | Area      | % Area | Int Type |
|----|----------------|-----------|--------|----------|
| 1  | 16.800         | 79.255    | 0.463  | BB       |
| 2  | 23.438         | 17042.738 | 99.537 | BB       |

**Ethyl-(2*S*,3'*S*,4'*S*,5'*S*)-5''-chloro-5'-(difluoromethyl)-1''-methyl-2'',3-dioxo-3H-dispiro[benzo[*b*]thiophene-2,2'-pyrrolidine-3',3''-indoline]-4'-carboxylate**

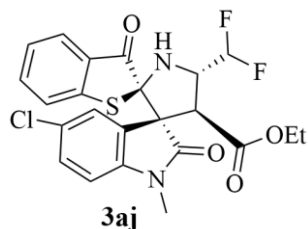

From 22.7 mg (0.1 mmol) of (Z)-2-((2,2-difluoroethyl)imino)benzo[*b*]thiophen-3(2H)-one **1a** and 31.8 mg (0.12 mmol, 1.2 equiv) of methyleneindolinone **2j**, 48.1 mg (98% yield) of compound **3aj** was obtained as a white solid,  $[\alpha]_{\text{D}}^{24} = -455$  ( $c = 1.0$ ,  $\text{CHCl}_3$ ), Mp. = 68-69 °C. Dr ( $> 20:1$ ) was determined by HPLC analysis. 98% ee was determined by HPLC analysis (Daicel Chiralpak IA column, 230 nm, hexane/2-propanol 50:50, 1.0 mL/min). Retention time:  $t_{\text{major}} = 8.7$  min,  $t_{\text{minor}} = 6.5$  min.  $^1\text{H}$  NMR (400 MHz,  $\text{CDCl}_3$ )  $\delta$  7.73 (dd,  $J = 7.7, 0.7$  Hz, 1H), 7.50 – 7.40 (m, 2H), 7.37 (dd,  $J = 8.3, 2.1$  Hz, 1H), 7.22 – 7.13 (m, 1H), 7.03 (d,  $J = 7.9$  Hz, 1H), 6.78 (d,  $J = 8.3$  Hz, 1H), 6.59 (ddd,  $J =$

58.2, 56.6, 7.1 Hz, 1H), 4.55 – 4.45 (m, 1H), 4.28 (d,  $J = 8.1$  Hz, 1H), 3.85 (dq,  $J = 10.8, 7.1$  Hz, 1H), 3.75 (dq,  $J = 10.8, 7.1$  Hz, 1H), 3.09 (s, 3H), 2.73 (s, 1H), 0.79 (t,  $J = 7.1$  Hz, 3H).  $^{13}\text{C}\{^1\text{H}\}$  NMR (101 MHz,  $\text{CDCl}_3$ )  $\delta$  202.1, 171.1, 167.3, 147.6, 142.8, 136.5, 129.9, 129.8, 128.8, 128.5, 127.3, 125.7, 124.6, 123.3, 117.3 (dd,  $J_{\text{C-F}} = 331.4, 323.7$  Hz), 109.0, 86.3, 62.6, 61.2, 59.4 (dd,  $J_{\text{C-F}} = 38.4, 32.7$  Hz), 49.7, 49.6, 26.8, 13.7.  $^{19}\text{F}$  NMR (376 MHz,  $\text{CDCl}_3$ )  $\delta$  -119.3 (d,  $J = 296.7$  Hz, 1F), -122.9 (d,  $J = 297.1$  Hz, 1F). HRMS (ESI)  $m/z$  calcd for  $\text{C}_{23}\text{H}_{19}\text{ClF}_2\text{N}_2\text{NaO}_4\text{S}$   $[\text{M}+\text{Na}]^+$ : 515.0614, found 515.0614.

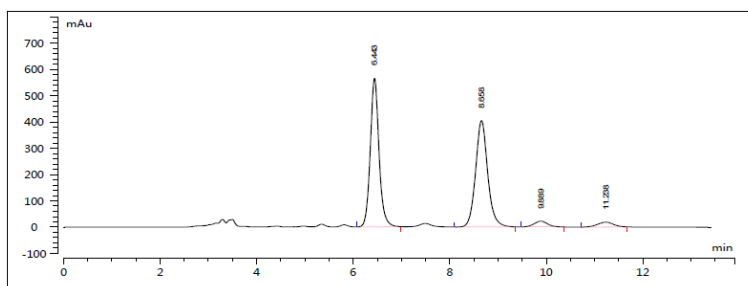

| No | Retention Time | Area     | % Area | Int Type |
|----|----------------|----------|--------|----------|
| 1  | 6.443          | 7124.814 | 47.353 | BB       |
| 2  | 8.658          | 7073.348 | 47.011 | BB       |
| 3  | 9.889          | 430.159  | 2.859  | BB       |
| 4  | 11.238         | 417.970  | 2.778  | BB       |

  

| No | Retention Time | Area     | % Area | Int Type |
|----|----------------|----------|--------|----------|
| 1  | 6.443          | 7124.814 | 50.181 | BB       |
| 2  | 8.658          | 7073.348 | 49.819 | BB       |

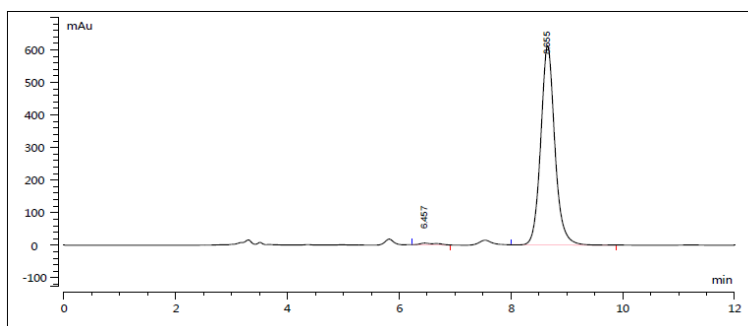

| No | Retention Time | Area      | % Area | Int Type |
|----|----------------|-----------|--------|----------|
| 1  | 6.457          | 104.585   | 0.970  | BB       |
| 2  | 8.655          | 10675.497 | 99.030 | BB       |

**Ethyl-(2*S*,3'*S*,4'*S*,5'*S*)-5''-bromo-5'-(difluoromethyl)-1''-methyl-2'',3-dioxo-3H-dispiro[benzo[*b*]thiophene-2,2'-pyrrolidine-3',3''-indoline]-4'-carboxylate**

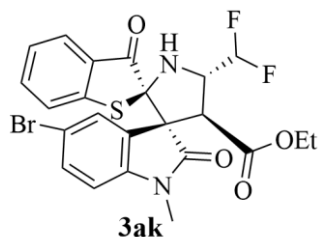

From 22.7 mg (0.1 mmol) of (Z)-2-((2,2-difluoroethyl)imino)benzo[*b*]thiophen-3(2H)-one **1a** and 37.1 mg (0.12 mmol, 1.2 equiv) of methyleneindolinone **2k**, 43.5 mg (83% yield) of compound **3ak** was obtained as a yellow solid,  $[\alpha]_D^{24} = -35$  ( $c = 1.0$ ,  $\text{CHCl}_3$ ), Mp. = 72–73 °C. Dr (> 20:1) was determined by HPLC analysis. 99% ee was determined by HPLC analysis (Daicel Chiralpak IA column, 230 nm, hexane/2-propanol 50:50, 1.0 mL/min). Retention time:  $t_{\text{major}} = 9.2$  min,  $t_{\text{minor}} = 6.5$  min.  $^1\text{H}$  NMR (400 MHz,  $\text{CDCl}_3$ )  $\delta$  7.81 – 7.67 (m, 1H), 7.60 – 7.50 (m, 2H), 7.45 (td,  $J = 7.9, 1.3$  Hz, 1H), 7.22 – 7.12 (m, 1H), 7.03 (d,  $J = 7.9$  Hz, 1H), 6.76 – 6.40 (m, 2H), 4.61 – 4.38 (m, 1H), 4.27 (d,  $J = 8.1$  Hz, 1H), 3.85 (dq,  $J = 10.8, 7.1$  Hz, 1H), 3.75 (dq,  $J = 10.8, 7.1$  Hz, 1H), 3.08 (s, 3H), 2.74 (s, 1H), 0.80 (t,  $J = 7.1$  Hz, 3H).  $^{13}\text{C}\{^1\text{H}\}$  NMR (101 MHz,  $\text{CDCl}_3$ )  $\delta$  202.1, 171.0, 167.3, 147.6, 143.3, 136.5, 132.8, 130.3, 128.7, 127.3, 127.3, 125.7, 123.3, 117.3 (dd,  $J_{\text{C-F}} = 331.3, 323.7$  Hz), 115.7, 109.5, 86.3, 62.5, 61.2, 59.4 (dd,  $J_{\text{C-F}} = 38.4, 32.6$  Hz), 49.7, 49.6, 26.8, 13.7.  $^{19}\text{F}$  NMR (376 MHz,  $\text{CDCl}_3$ )  $\delta$  -119.2 (d,  $J = 297.1$  Hz, 1F), -122.8 (d,  $J = 296.7$  Hz, 1F). HRMS (ESI)  $m/z$  calcd for  $\text{C}_{23}\text{H}_{19}\text{BrF}_2\text{N}_2\text{NaO}_4\text{S} [\text{M}+\text{Na}]^+$ : 559.0109 found 559.0109.

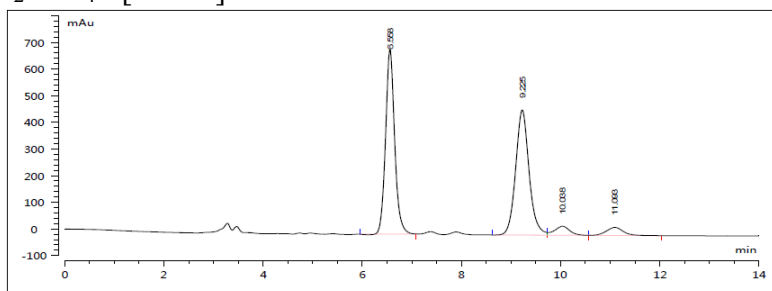

| No | Retention Time | Area     | % Area | Int Type |
|----|----------------|----------|--------|----------|
| 1  | 6.558          | 8807.048 | 46.218 | BB       |
| 2  | 9.225          | 8810.980 | 46.238 | BB       |
| 3  | 10.038         | 719.871  | 3.778  | BB       |
| 4  | 11.093         | 717.695  | 3.766  | BB       |

  

| No | Retention Time | Area     | % Area | Int Type |
|----|----------------|----------|--------|----------|
| 1  | 6.558          | 8807.048 | 49.989 | BB       |
| 2  | 9.225          | 8810.980 | 50.011 | BB       |

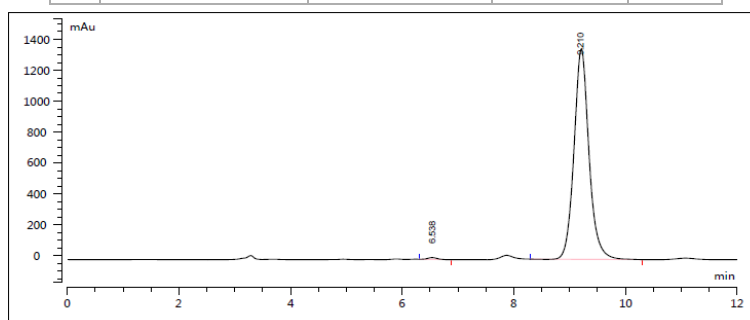

| No | Retention Time | Area     | % Area | Int Type |
|----|----------------|----------|--------|----------|
| 1  | 6.558          | 8807.048 | 49.989 | BB       |
| 2  | 9.210          | 8810.980 | 50.011 | BB       |

|   |       |           |        |    |
|---|-------|-----------|--------|----|
| 1 | 6.538 | 135.886   | 0.530  | BB |
| 2 | 9.210 | 25486.011 | 99.470 | BB |

**Ethyl-(2*S*,3'*S*,4'*S*,5'*S*)-5'-(difluoromethyl)-1'',5''-dimethyl-2'',3-dioxo-3*H*-dispiro[benzo[*b*]thiophene-2,2'-pyrrolidine-3',3''-indoline]-4'-carboxylate**

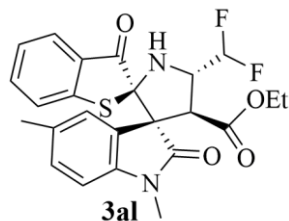

From 22.7 mg (0.1 mmol) of (*Z*)-2-((2,2-difluoroethyl)imino)benzo[*b*]thiophen-3(2*H*)-one **1a** and 29.4 mg (0.12 mmol, 1.2 equiv) of methyleneindolinone **2l**, 43.5 mg (89% yield) of compound **3al** was obtained as a white solid,  $[\alpha]_D^{24} = -429$  ( $c = 1.0$ ,  $\text{CHCl}_3$ ), Mp. = 106-107 °C. Dr (> 20:1) was determined by HPLC analysis. 98% ee was determined by HPLC analysis (Daicel Chiralpak IA column, 230 nm, hexane/2-propanol 50:50, 1.0 mL/min). Retention time:  $t_{\text{major}} = 8.5$  min,  $t_{\text{minor}} = 6.1$  min.  $^1\text{H NMR}$  (400 MHz,  $\text{CDCl}_3$ )  $\delta$  7.73 (dd,  $J = 7.7, 0.6$  Hz, 1H), 7.43 (td,  $J = 7.9, 1.3$  Hz, 1H), 7.25 – 7.09 (m, 3H), 7.01 (d,  $J = 7.9$  Hz, 1H), 6.78 – 6.36 (m, 2H), 4.54 (ddd,  $J = 11.8, 7.3, 3.4$  Hz, 1H), 4.28 (d,  $J = 8.1$  Hz, 1H), 3.81 (dq,  $J = 10.8, 7.1$  Hz, 1H), 3.71 (dq,  $J = 10.8, 7.1$  Hz, 1H), 3.08 (s, 3H), 2.72 (s, 1H), 2.39 (s, 3H), 0.75 (t,  $J = 7.1$  Hz, 3H).  $^{13}\text{C}\{^1\text{H}\}$  NMR (101 MHz,  $\text{CDCl}_3$ )  $\delta$  202.5, 171.4, 167.6, 147.8, 141.8, 136.3, 132.8, 130.2, 128.9, 128.4, 127.3, 125.6, 124.9, 123.2, 117.5 (dd,  $J_{\text{C-F}} = 330.9, 323.6$  Hz), 107.8, 86.6, 62.6, 60.9, 59.6 (dd,  $J_{\text{C-F}} = 38.2, 32.3$  Hz), 49.8, 49.7, 26.7, 21.3, 13.6.  $^{19}\text{F NMR}$  (376 MHz,  $\text{CDCl}_3$ )  $\delta$  -119.3 (d,  $J = 295.9$  Hz, 1F), -123.0 (d,  $J = 295.9$  Hz, 1F). HRMS (ESI)  $m/z$  calcd for  $\text{C}_{24}\text{H}_{22}\text{F}_2\text{N}_2\text{NaO}_4\text{S}$   $[\text{M}+\text{Na}]^+$ : 495.1161, found 495.1161.

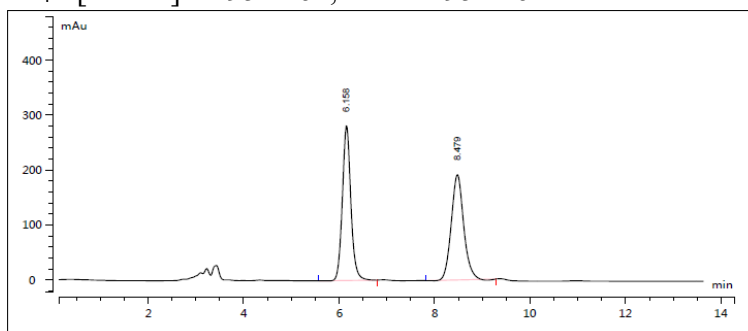

| No | Retention Time | Area     | % Area | Int Type |
|----|----------------|----------|--------|----------|
| 1  | 6.158          | 3495.106 | 50.331 | BB       |
| 2  | 8.479          | 3449.153 | 49.669 | BB       |

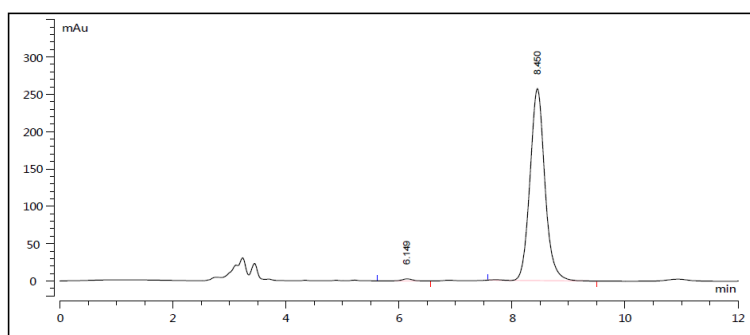

| No | Retention Time | Area     | % Area | Int Type |
|----|----------------|----------|--------|----------|
| 1  | 6.149          | 33.249   | 0.702  | BB       |
| 2  | 8.450          | 4703.165 | 99.298 | BB       |

**Ethyl-(2*S*,3'*S*,4'*S*,5'*S*)-5'-(difluoromethyl)-5''-methoxy-1''-methyl-2'',3-dioxo-3*H*-dispiro[benzo[*b*]thiophene-2,2'-pyrrolidine-3',3''-indoline]-4'-carboxylate**

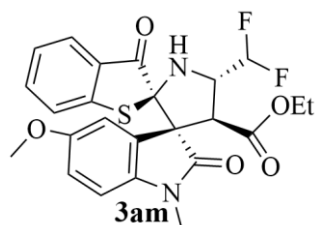

From 22.7 mg (0.1 mmol) of (*Z*)-2-((2,2-difluoroethyl)imino)benzo[*b*]thiophen-3(2*H*)-one **1a** and 31.3 mg (0.12 mmol, 1.2 equiv) of methyleneindolinone **2m**, 43.5 mg (99% yield) of compound **3am** was obtained as a white solid,  $[\alpha]_D^{24} = -400$  ( $c = 1.0$ ,  $\text{CHCl}_3$ ), Mp. = 83-84 °C. Dr ( $> 20:1$ ) was determined by HPLC analysis. 99% ee was determined by

HPLC analysis (Daicel Chiralpak IA column, 230 nm, hexane/2-propanol 50:50, 1.0 mL/min). Retention time:  $t_{\text{major}} = 11.3$  min,  $t_{\text{minor}} = 9.5$  min.  $^1\text{H}$  NMR (400 MHz,  $\text{CDCl}_3$ )  $\delta$  7.73 (d,  $J = 7.2$  Hz, 1H), 7.53 – 7.36 (m, 1H), 7.17 (dd,  $J = 11.1, 3.9$  Hz, 1H), 7.03 (dd,  $J = 16.1, 5.2$  Hz, 2H), 6.90 (dd,  $J = 8.5, 2.5$  Hz, 1H), 6.78 – 6.41 (m, 2H), 4.52 (td,  $J = 12.1, 5.2$  Hz, 1H), 4.28 (d,  $J = 8.1$  Hz, 1H), 3.95 – 3.77 (m, 4H), 3.75 – 3.67 (m, 1H), 3.07 (s, 3H), 2.72 (s, 1H), 0.77 (t,  $J = 7.1$  Hz, 3H).  $^{13}\text{C}\{^1\text{H}\}$  NMR (101 MHz,  $\text{CDCl}_3$ )  $\delta$  202.5, 171.1, 167.5, 156.2, 147.8, 137.6, 136.3, 129.5, 128.9, 127.3, 125.6, 123.2, 117.5 (dd,  $J_{\text{C-F}} = 331.0, 323.6$  Hz), 113.9, 111.8, 108.4, 86.5, 62.9, 61.0, 59.5 (dd,  $J_{\text{C-F}} = 38.2, 32.5$  Hz), 55.9, 49.7, 49.6, 26.7, 13.6.  $^{19}\text{F}$  NMR (376 MHz,  $\text{CDCl}_3$ )  $\delta$  -119.3 (d,  $J = 295.9$  Hz, 1F), -123.0 (d,  $J = 296.3$  Hz, 1F). HRMS (ESI)  $m/z$  calcd for  $\text{C}_{24}\text{H}_{22}\text{F}_2\text{N}_2\text{NaO}_5\text{S}$   $[\text{M}+\text{Na}]^+$ : 511.1110, found 511.1110.

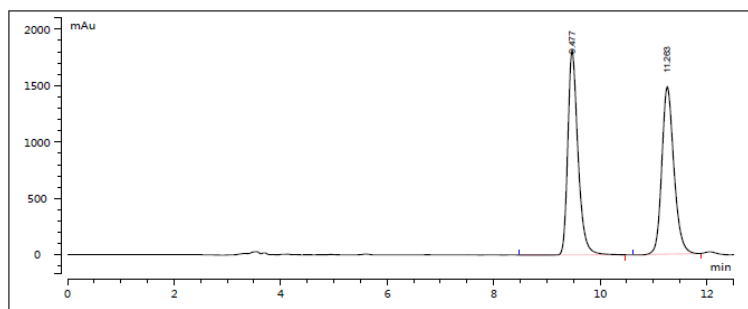

| No | Retention Time | Area      | % Area | Int Type |
|----|----------------|-----------|--------|----------|
| 1  | 9.477          | 23985.411 | 50.555 | BB       |
| 2  | 11.263         | 23458.680 | 49.445 | BB       |

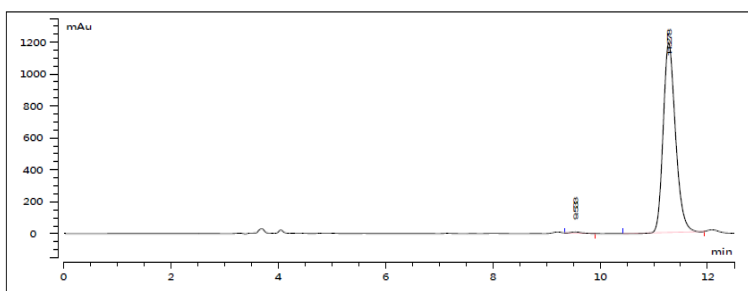

| No | Retention Time | Area      | % Area | Int Type |
|----|----------------|-----------|--------|----------|
| 1  | 9.533          | 88.763    | 0.468  | BB       |
| 2  | 11.278         | 18871.331 | 99.532 | BB       |

**Ethyl-(2*S*,3'*S*,4*S*,5'*S*)-5'-(difluoromethyl)-1''-methyl-2'',3-dioxo-5''-(trifluoromethoxy)-3*H*-dispiro[benzo[*b*]thiophene-2,2'-pyrrolidine-3',3''-indoline]-4'-carboxylate**

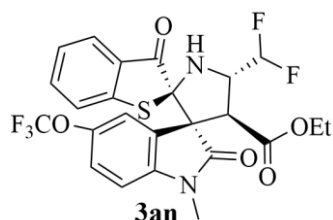

From 22.7 mg (0.1 mmol) of (*Z*)-2-((2,2-difluoroethyl)imino)benzo[*b*]thiophen-3(2*H*)-one **1a** and 37.8 mg (0.12 mmol, 1.2 equiv) of methyleneindolinone **2n**, 47.9 mg (89% yield) of compound **3an** was obtained as a white solid,  $[\alpha]_D^{24} = -356$  ( $c = 1.0$ ,  $\text{CHCl}_3$ ),  $\text{Mp.} = 86\text{--}87$  °C.  $\text{Dr} (> 20:1)$  was determined by HPLC analysis. 98% ee was determined by HPLC analysis (Daicel Chiralpak IA column, 230 nm, hexane/2-propanol 50:50, 1.0 mL/min). Retention time:  $t_{\text{major}} = 6.8$  min,  $t_{\text{minor}} = 5.3$  min.  $^1\text{H NMR}$  (400 MHz,  $\text{CDCl}_3$ )  $\delta$  7.84 – 7.60 (m, 1H), 7.46 (td,  $J = 7.9, 1.3$  Hz, 1H), 7.34 (d,  $J = 1.6$  Hz, 1H), 7.28 (dd,  $J = 6.5, 5.1$  Hz, 1H), 7.18 (dd,  $J = 11.1, 4.0$  Hz, 1H), 7.03 (d,  $J = 7.9$  Hz, 1H), 6.84 (d,  $J = 8.5$  Hz, 1H), 6.60 (ddd,  $J = 58.1, 56.7, 7.0$  Hz, 1H), 4.58 – 4.43 (m, 1H), 4.28 (d,  $J = 8.0$  Hz, 1H), 3.85 (dq,  $J = 10.8, 7.1$  Hz, 1H), 3.78 – 3.64 (m, 1H), 3.11 (s, 3H), 2.73 (s, 1H), 0.78 (t,  $J = 7.1$  Hz, 3H).  $^{13}\text{C}\{^1\text{H}\}$  NMR (101 MHz,  $\text{CDCl}_3$ )  $\delta$  202.1, 171.3, 167.3, 147.6, 144.8, 144.8, 142.9, 136.5, 129.7, 128.7, 127.3, 125.7, 123.3, 123.0, 121.8, 119.3, 118.6, 117.3 (dd,  $J_{\text{C-F}} = 331.4, 323.6$  Hz), 108.5, 86.3, 62.6, 61.2, 59.3 (dd,  $J_{\text{C-F}} = 38.4, 32.7$  Hz), 49.7, 49.6, 26.8, 13.5.  $^{19}\text{F NMR}$  (376 MHz,  $\text{CDCl}_3$ )  $\delta$  -58.4, -119.3 (d,  $J = 297.1$  Hz, 1F), -123.0 (d,  $J = 297.5$  Hz, 1F). HRMS (ESI)  $m/z$  calcd for  $\text{C}_{24}\text{H}_{19}\text{F}_5\text{N}_2\text{NaO}_5\text{S} [\text{M}+\text{Na}]^+$ : 565.0827, found 565.0827.

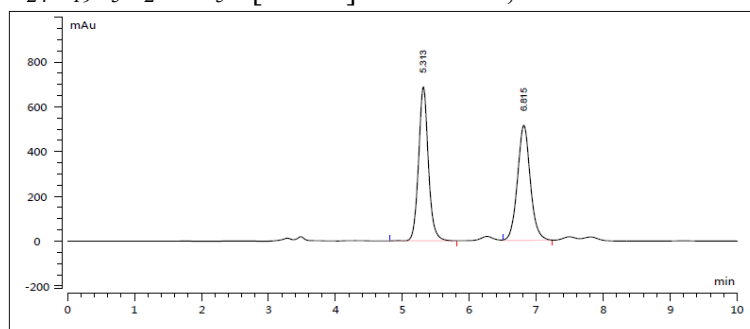

| No | Retention Time | Area     | % Area | Int Type |
|----|----------------|----------|--------|----------|
| 1  | 5.313          | 6982.515 | 50.493 | BB       |
| 2  | 6.815          | 6846.061 | 49.507 | BB       |



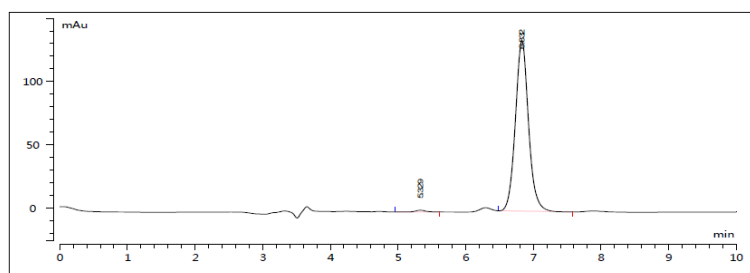

| No | Retention Time | Area     | % Area | Int Type |
|----|----------------|----------|--------|----------|
| 1  | 5.329          | 12.265   | 0.671  | BB       |
| 2  | 6.832          | 1816.784 | 99.329 | BB       |

**Ethyl-(2*S*,3'*S*,4'*S*,5'*S*)-6'-chloro-5'-(difluoromethyl)-1'-methyl-2'',3-dioxo-3*H*-dispiro[benzo[*b*]thiophene-2,2'-pyrrolidine-3',3''-indoline]-4'-carboxylate**

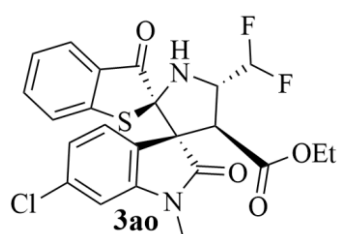

From 22.7 mg (0.1 mmol) of (Z)-2-((2,2-difluoroethyl)imino)benzo[*b*]thiophen-3(2*H*)-one **1a** and 31.8 mg (0.12 mmol, 1.2 equiv) of methyleneindolinone **2o**, 47.0 mg (96% yield) of compound **3ao** was obtained as a white solid,  $[\alpha]_D^{25} = -393$  ( $c = 1.0$ ,  $\text{CHCl}_3$ ), Mp. = 175-176 °C. Dr (> 20:1) was determined by HPLC analysis. 99%

ee was determined by HPLC analysis (Daicel Chiralpak IA column, 230 nm, hexane/2-propanol 50:50, 1.0 mL/min). Retention time:  $t_{\text{major}} = 11.3$  min,  $t_{\text{minor}} = 6.9$  min.  $^1\text{H}$  NMR (400 MHz,  $\text{CDCl}_3$ )  $\delta$  7.72 (d,  $J = 7.7$  Hz, 1H), 7.52 – 7.41 (m, 1H), 7.35 (d,  $J = 8.0$  Hz, 1H), 7.17 (dd,  $J = 11.1, 3.9$  Hz, 1H), 7.11 (dd,  $J = 8.0, 1.8$  Hz, 1H), 7.02 (d,  $J = 7.9$  Hz, 1H), 6.85 (d,  $J = 1.7$  Hz, 1H), 6.75 – 6.41 (m, 1H), 4.57 – 4.40 (m, 1H), 4.28 (d,  $J = 8.1$  Hz, 1H), 3.83 (dq,  $J = 10.9, 7.1$  Hz, 1H), 3.74 (dq,  $J = 10.8, 7.1$  Hz, 1H), 3.08 (s, 3H), 2.74 (s, 1H), 0.81 (t,  $J = 7.1$  Hz, 3H).  $^{13}\text{C}\{^1\text{H}\}$  NMR (101 MHz,  $\text{CDCl}_3$ )  $\delta$  202.1, 171.5, 167.4, 147.6, 145.3, 136.5, 135.9, 128.8, 127.3, 126.7, 125.7, 125.2, 123.3, 123.0, 117.3 (dd,  $J_{\text{C-F}} = 331.1, 323.7$  Hz), 108.9, 86.4, 62.2, 61.2, 59.5 (dd,  $J_{\text{C-F}} = 38.4, 32.6$  Hz), 49.7, 49.6, 26.8, 13.7.  $^{19}\text{F}$  NMR (376 MHz,  $\text{CDCl}_3$ )  $\delta$  -119.3 (d,  $J = 297.1$  Hz, 1F), -122.9 (d,  $J = 296.7$  Hz, 1F). HRMS (ESI)  $m/z$  calcd for  $\text{C}_{23}\text{H}_{19}\text{ClF}_2\text{N}_2\text{NaO}_4\text{S}$   $[\text{M}+\text{Na}]^+$ : 515.0614, found 515.0614.

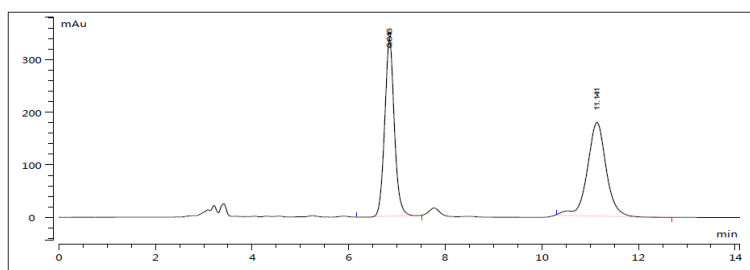

| No | Retention Time | Area     | % Area | Int Type |
|----|----------------|----------|--------|----------|
| 1  | 6.846          | 4662.004 | 49.157 | BB       |
| 2  | 11.141         | 4821.956 | 50.843 | BB       |

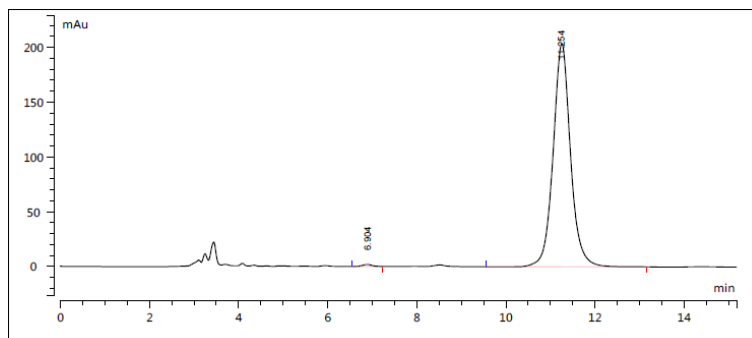

| No | Retention Time | Area     | % Area | Int Type |
|----|----------------|----------|--------|----------|
| 1  | 6.904          | 28.535   | 0.513  | BB       |
| 2  | 11.254         | 5530.655 | 99.487 | BB       |

**Ethyl-(2*S*,3'*S*,4'*S*,5'*S*)-5'-(difluoromethyl)-6'-methoxy-1'-methyl-2'',3-dioxo-3*H*-dispiro[benzo[*b*]thiophene-2,2'-pyrrolidine-3',3''-indoline]-4'-carboxylate**

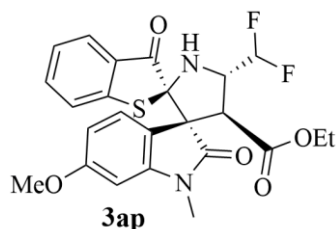

From 22.7 mg (0.1 mmol) of (*Z*)-2-((2,2-difluoroethyl)imino)benzo[*b*]thiophen-3(2*H*)-one **1a** and 31.3 mg (0.12 mmol, 1.2 equiv) of methyleneindolinone **2p**, 36.0 mg (74% yield) of compound **3ap** was obtained as a pink solid,  $[\alpha]_D^{25} = -360$  ( $c = 1.0$ ,  $\text{CHCl}_3$ ), Mp. = 179–180 °C. Dr (> 20:1) was determined by HPLC analysis. 96%

ee was determined by HPLC analysis (Daicel Chiralpak IA column, 230 nm, hexane/2-propanol 50:50, 1.0 mL/min). Retention time:  $t_{\text{major}} = 12.6$  min,  $t_{\text{minor}} = 8.8$  min.  $^1\text{H}$  NMR (400 MHz,  $\text{CDCl}_3$ )  $\delta$  7.72 (d,  $J = 7.7$  Hz, 1H), 7.51 – 7.38 (m, 1H), 7.32 (d,  $J = 8.3$  Hz, 1H), 7.16 (dd,  $J = 11.1, 3.9$  Hz, 1H), 7.02 (d,  $J = 7.9$  Hz, 1H), 6.80 – 6.23 (m, 3H), 4.51 (dt,  $J = 11.8, 5.8$  Hz, 1H), 4.27 (d,  $J = 8.1$  Hz, 1H), 3.97 – 3.77 (m, 4H), 3.77 – 3.60 (m, 1H), 3.07 (s, 3H), 2.71 (s, 1H), 0.80 (t,  $J = 7.1$  Hz, 3H).  $^{13}\text{C}\{^1\text{H}\}$  NMR (101 MHz,  $\text{CDCl}_3$ )  $\delta$  202.4, 172.0, 167.7, 161.4, 147.9, 145.5, 136.3, 128.9, 127.3, 125.6, 125.1, 123.2, 120.4, 117.5 (dd,  $J_{\text{C-F}} = 331.3, 323.7$  Hz), 106.2, 96.4, 87.0, 62.2, 61.0, 59.6 (dd,  $J_{\text{C-F}} = 38.2, 32.3$  Hz), 55.5, 49.8, 49.7, 26.7, 13.7.  $^{19}\text{F}$  NMR (376 MHz,  $\text{CDCl}_3$ )  $\delta$  -119.4 (d,  $J = 295.9$  Hz, 1F), -123.0 (d,  $J = 295.9$  Hz, 1F). HRMS (ESI)  $m/z$  calcd for  $\text{C}_{24}\text{H}_{22}\text{F}_2\text{N}_2\text{NaO}_5\text{S} [\text{M}+\text{Na}]^+$ : 511.1110, found 511.1110.

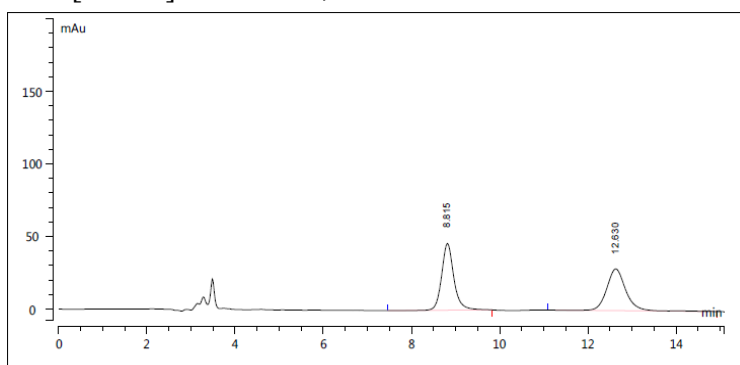

| No | Retention Time | Area | % Area | Int Type |
|----|----------------|------|--------|----------|
| 1  | 8.815          |      |        |          |
| 2  | 12.610         |      |        |          |

|   |        |         |        |    |
|---|--------|---------|--------|----|
| 1 | 8.815  | 880.012 | 50.886 | BB |
| 2 | 12.630 | 849.368 | 49.114 | BB |

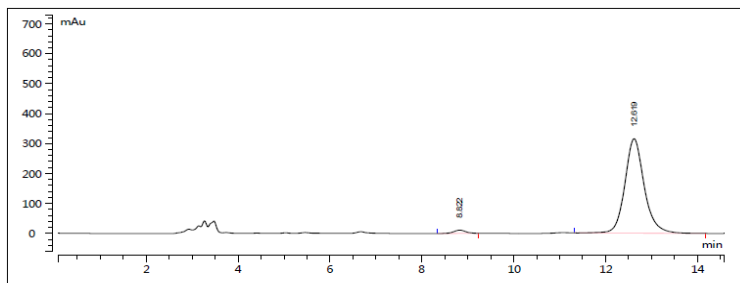

| No | Retention Time | Area     | % Area | Int Type |
|----|----------------|----------|--------|----------|
| 1  | 8.822          | 191.958  | 2.033  | BB       |
| 2  | 12.619         | 9251.770 | 97.967 | BB       |

**Ethyl-(2*S*,3'*S*,4'*S*,5'*S*)-5'-(difluoromethyl)-7'-fluoro-1'-methyl-2'',3-dioxo-3*H*-dispiro[benzo[*b*]thiophene-2,2'-pyrrolidine-3',3'-indoline]-4'-carboxylate**

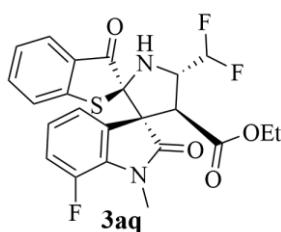

From 22.7 mg (0.1 mmol) of (*Z*)-2-((2,2-difluoroethyl)imino) benzo[*b*]thiophen-3(2*H*)-one **1a** and 29.9 mg (0.12 mmol, 1.2 equiv) of methyleneindolinone **2q**, 45.0 mg (89% yield) of compound **3aq** was obtained as a white solid,  $[\alpha]_D^{24} = -393$  ( $c = 1.0$ ,  $\text{CHCl}_3$ ), Mp. = 165-166 °C. Dr (> 20:1) was determined by HPLC analysis. 98% ee was determined by

HPLC analysis (Daicel Chiralpak IA column, 230 nm, hexane/2-propanol 50:50, 1.0 mL/min). Retention time:  $t_{\text{major}} = 8.4$  min,  $t_{\text{minor}} = 7.0$  min.  $^1\text{H}$  NMR (400 MHz,  $\text{CDCl}_3$ )  $\delta$  7.73 (dd,  $J = 7.7, 0.7$  Hz, 1H), 7.46 (td,  $J = 7.9, 1.3$  Hz, 1H), 7.31 – 6.99 (m, 5H), 6.59 (ddd,  $J = 58.2, 56.6, 7.1$  Hz, 1H), 4.62 – 4.38 (m, 1H), 4.27 (d,  $J = 8.1$  Hz, 1H), 3.88 (dq,  $J = 10.8, 7.1$  Hz, 1H), 3.74 (dq,  $J = 10.8, 7.1$  Hz, 1H), 3.30 (d,  $J = 2.7$  Hz, 3H), 2.74 (s, 1H), 0.82 (t,  $J = 7.1$  Hz, 3H).  $^{13}\text{C}\{^1\text{H}\}$  NMR (101 MHz,  $\text{CDCl}_3$ )  $\delta$  202.2, 171.2, 167.4, 148.7, 147.6, 146.3, 136.5, 131.1, 131.1, 130.9, 130.8, 128.7, 127.3, 125.7, 123.8, 123.7, 123.3, 120.1, 120.1, 119.8, 118.0, 117.4 (dd,  $J_{\text{C-F}} = 331.3, 323.7$  Hz) 86.5, 62.7, 61.1, 59.5 (dd,  $J_{\text{C-F}} = 38.4, 32.6$  Hz) 49.9, 49.8, 29.2, 29.2, 13.6.  $^{19}\text{F}$  NMR (376 MHz,  $\text{CDCl}_3$ )  $\delta$  -119.3 (d,  $J = 296.3$  Hz, 1F), -123.0 (d,  $J = 296.7$  Hz, 1F), -136.2. HRMS (ESI)  $m/z$  calcd for  $\text{C}_{23}\text{H}_{19}\text{F}_3\text{N}_2\text{NaO}_4\text{S}$   $[\text{M}+\text{Na}]^+$ : 499.0910, found 499.0910.

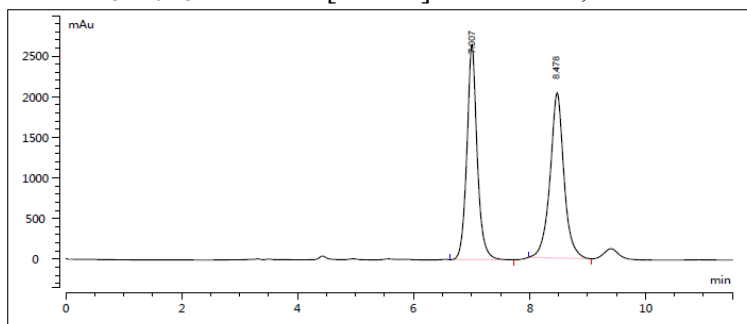

| No | Retention Time | Area      | % Area | Int Type |
|----|----------------|-----------|--------|----------|
| 1  | 7.007          | 32735.616 | 49.059 | BB       |
| 2  | 8.478          | 33991.362 | 50.941 | BB       |

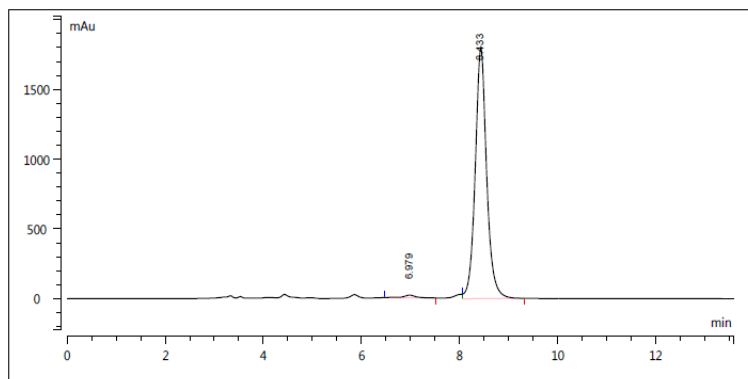

| No | Retention Time | Area      | % Area | Int Type |
|----|----------------|-----------|--------|----------|
| 1  | 6.979          | 302.800   | 1.027  | BB       |
| 2  | 8.433          | 29176.251 | 98.973 | BB       |

**Ethyl-(2*S*,3'*S*,4'*S*,5'*S*)-7''-chloro-5'-(difluoromethyl)-1''-methyl-2'',3-dioxo-3*H*-dispiro[benzo[*b*]thiophene-2,2'-pyrrolidine-3',3''-indoline]-4'-carboxylate**

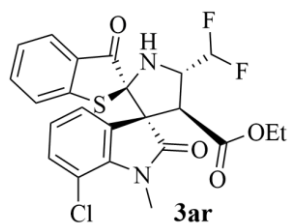

From 22.7 mg (0.1 mmol) of (*Z*)-2-((2,2-difluoroethyl)imino)benzo[*b*]thiophen-3(2*H*)-one **1a** and 31.8 mg (0.12 mmol, 1.2 equiv) of methyleneindolinone **2r**, 47.0 mg (96% yield) of compound **3ar** was obtained as a white solid,  $[\alpha]_D^{24} = -376$  ( $c = 1.0$ ,  $\text{CHCl}_3$ ), Mp. = 75-76 °C. Dr (> 20:1) was determined by HPLC analysis. 99% ee was determined by HPLC analysis

(Daicel Chiralpak IA column, 230 nm, hexane/2-propanol 80:20, 1.0 mL/min). Retention time:  $t_{\text{major}} = 18.1$  min,  $t_{\text{minor}} = 16.2$  min.  $^1\text{H}$  NMR (400 MHz,  $\text{CDCl}_3$ )  $\delta$  7.73 (d,  $J = 7.3$  Hz, 1H), 7.55 – 7.40 (m, 1H), 7.39 – 7.29 (m, 2H), 7.18 (t,  $J = 7.4$  Hz, 1H), 7.05 (t,  $J = 7.7$  Hz, 2H), 6.60 (ddd,  $J = 58.1, 56.8, 7.1$  Hz, 1H), 4.62 – 4.39 (m, 1H), 4.26 (d,  $J = 8.1$  Hz, 1H), 3.90 (dq,  $J = 10.8, 7.1$  Hz, 1H), 3.72 (dq,  $J = 10.8, 7.1$  Hz, 1H), 3.45 (s, 3H), 2.72 (s, 1H), 0.82 (t,  $J = 7.1$  Hz, 3H).  $^{13}\text{C}\{^1\text{H}\}$  NMR (101 MHz,  $\text{CDCl}_3$ )  $\delta$  202.2, 171.9, 167.4, 147.6, 140.1, 136.5, 132.2, 131.1, 128.7, 127.3, 125.7, 123.9, 123.3, 122.8, 117.4 (dd,  $J_{\text{C-F}} = 331.4, 323.5$  Hz), 86.6, 62.1, 61.2, 59.5 (dd,  $J_{\text{C-F}} = 38.4, 32.7$  Hz), 50.0, 50.0, 30.2, 13.6.  $^{19}\text{F}$  NMR (376 MHz,  $\text{CDCl}_3$ )  $\delta$  -119.2 (d,  $J = 297.1$  Hz, 1F), -123.0 (d,  $J = 297.1$  Hz, 1F). HRMS (ESI)  $m/z$  calcd for  $\text{C}_{23}\text{H}_{19}\text{ClF}_2\text{N}_2\text{NaO}_4\text{S} [\text{M}+\text{Na}]^+$ : 515.0614, found 515.0614.

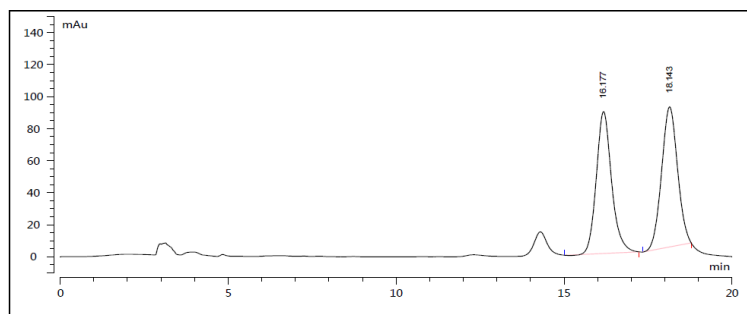

| No | Retention Time | Area     | % Area | Int Type |
|----|----------------|----------|--------|----------|
| 1  | 16.177         | 2802.172 | 49.292 | BB       |
| 2  | 18.143         | 2882.641 | 50.708 | BB       |

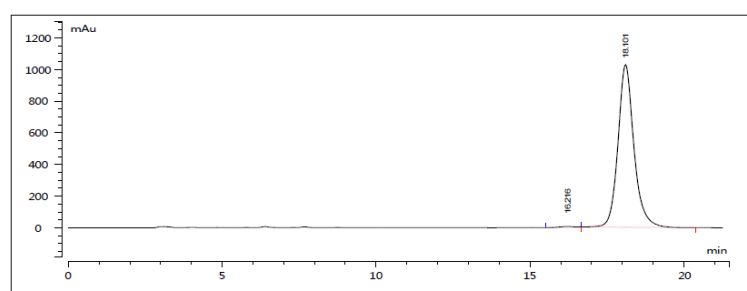

| No | Retention Time | Area      | % Area | Int Type |
|----|----------------|-----------|--------|----------|
| 1  | 16.216         | 130.951   | 0.352  | BB       |
| 2  | 18.101         | 37068.727 | 99.648 | BB       |

**Ethyl-(2*S*,3'*S*,4*S*,5'*S*)-7''-bromo-5'-(difluoromethyl)-1''-methyl-2'',3-dioxo-3*H*-dispiro[benzo[*b*]thiophene-2,2'-pyrrolidine-3',3''-indoline]-4'-carboxylate**

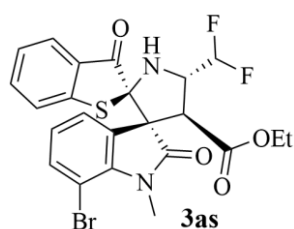

From 22.7 mg (0.1 mmol) of (*Z*)-2-((2,2-difluoroethyl)imino)benzo[*b*]thiophen-3(2*H*)-one **1a** and 37.1 mg (0.12 mmol, 1.2 equiv) of methyleneindolinone **2s**, 50.0 mg (93% yield) of compound **3as** was obtained as a yellow solid,  $[\alpha]_D^{24} = -363$  ( $c = 1.0$ ,  $\text{CHCl}_3$ ),  $\text{Mp.} = 76\text{--}77^\circ\text{C}$ .  $\text{Dr} (> 20:1)$  was determined by HPLC analysis. 99% ee was determined by HPLC analysis (Daicel Chiralpak IA column, 230 nm, hexane/2-propanol 80:20, 1.0 mL/min). Retention time:  $t_{\text{major}} = 10.6$  min,  $t_{\text{minor}} = 8.2$  min.  $^1\text{H NMR}$  (400 MHz,  $\text{CDCl}_3$ )  $\delta$  7.73 (d,  $J = 7.4$  Hz, 1H), 7.48 (ddd,  $J = 18.4, 11.7, 4.8$  Hz, 2H), 7.39 (dd,  $J = 7.4, 0.9$  Hz, 1H), 7.18 (t,  $J = 7.5$  Hz, 1H), 7.04 (d,  $J = 7.9$  Hz, 1H), 7.01 – 6.93 (m, 1H), 6.61 (ddd,  $J = 58.1, 56.7, 7.1$  Hz, 1H), 4.58 – 4.42 (m, 1H), 4.25 (d,  $J = 8.0$  Hz, 1H), 3.90 (dq,  $J = 10.8, 7.1$  Hz, 1H), 3.72 (dq,  $J = 10.8, 7.1$  Hz, 1H), 3.47 (s, 3H), 2.72 (s, 1H), 0.82 (t,  $J = 7.1$  Hz, 3H).  $^{13}\text{C}\{^1\text{H}\}$  NMR (101 MHz,  $\text{CDCl}_3$ )  $\delta$  202.2, 172.1, 167.3, 147.6, 141.5, 136.5, 135.5, 131.4, 128.7, 127.3, 125.7, 124.3, 123.3, 123.3, 117.4 (dd,  $J_{\text{C-F}} = 331.4, 323.6$  Hz), 102.5, 86.6, 62.1, 61.2, 59.5 (dd,  $J_{\text{C-F}} = 38.4, 32.6$  Hz), 50.1, 50.0, 30.4, 13.6.  $^{19}\text{F NMR}$  (376 MHz,  $\text{CDCl}_3$ )  $\delta$  -119.2 (d,  $J = 296.7$  Hz, 1F), -123.0 (d,  $J = 297.5$  Hz, 1F). HRMS (ESI)  $m/z$  calcd for  $\text{C}_{23}\text{H}_{19}\text{BrF}_2\text{N}_2\text{NaO}_4\text{S}$   $[\text{M}+\text{Na}]^+$ : 559.0109, found

559.0109.

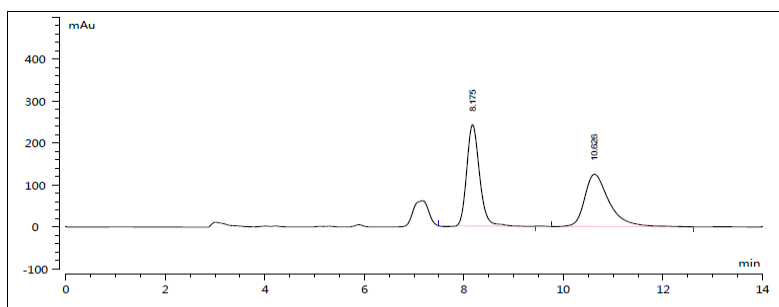

| No | Retention Time | Area     | % Area | Int Type |
|----|----------------|----------|--------|----------|
| 1  | 8.175          | 4279.940 | 49.986 | BB       |
| 2  | 10.626         | 4282.407 | 50.014 | BB       |

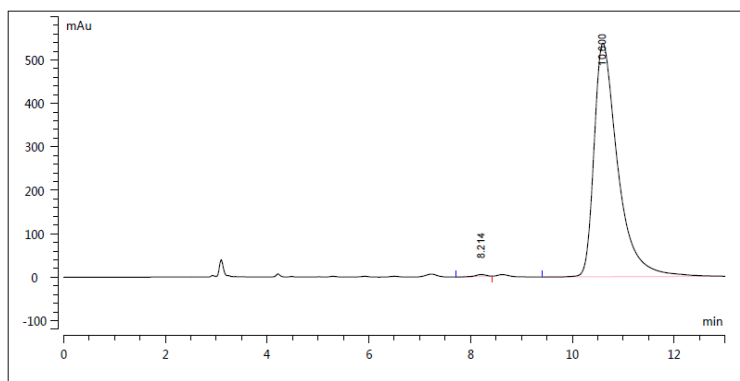

| No | Retention Time | Area      | % Area | Int Type |
|----|----------------|-----------|--------|----------|
| 1  | 8.214          | 61.312    | 0.351  | BB       |
| 2  | 10.600         | 17393.858 | 99.649 | BB       |

**Ethyl-(2*S*,3'*S*,4'*S*,5'*S*)-5'-(difluoromethyl)-1'',7''-dimethyl-2'',3-dioxo-3H-dispiro[benzo[*b*]thiophene-2,2'-pyrrolidine-3',3''-indoline]-4'-carboxylate**

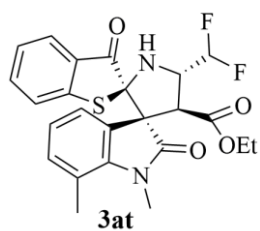

From 22.7 mg (0.1 mmol) of (*Z*)-2-((2,2-difluoroethyl)imino)benzo[*b*]thiophen-3(2*H*)-one **1a** and 29.4 mg (0.12 mmol, 1.2 equiv) of methyleneindolinone **2t**, 43.0 mg (91% yield) of compound **3at** was obtained as a white solid,  $[\alpha]_D^{24} = -404$  ( $c = 1.0$ ,  $\text{CHCl}_3$ ), Mp. = 71-72 °C. Dr (> 20:1) was determined by HPLC analysis. 99% ee was determined by HPLC analysis (Daicel Chiralpak IA column, 230 nm, hexane/2-propanol 50:50, 1.0 mL/min). Retention time:  $t_{\text{major}} = 11.7$  min,  $t_{\text{minor}} = 12.9$  min.  $^1\text{H}$  NMR (400 MHz,  $\text{CDCl}_3$ )  $\delta$  7.73 (dd,  $J = 7.7, 0.6$  Hz, 1H), 7.44 (td,  $J = 7.9, 1.3$  Hz, 1H), 7.28 (d,  $J = 8.9$  Hz, 1H), 7.20 – 7.08 (m, 2H), 7.01 (t,  $J = 7.5$  Hz, 2H), 6.59 (ddd,  $J = 58.2, 56.7, 7.1$  Hz, 1H), 4.63 – 4.44 (m, 1H), 4.26 (d,  $J = 8.1$  Hz, 1H), 3.87 (dq,  $J = 10.8, 7.1$  Hz, 1H), 3.70 (dq,  $J = 10.8, 7.1$  Hz, 1H), 3.36 (s, 3H), 2.72 (s, 1H), 2.56 (s, 3H), 0.78 (t,  $J = 7.1$  Hz, 3H).  $^{13}\text{C}\{^1\text{H}\}$  NMR (101 MHz,  $\text{CDCl}_3$ )  $\delta$  202.6, 172.3, 167.6, 147.8, 141.9, 136.3, 133.7,

129.0, 128.9, 127.3, 125.6, 123.2, 123.1, 122.1, 119.6, 117.5 (dd,  $J_{C-F} = 330.9, 323.6$  Hz) 86.8, 61.9, 60.9, 59.6 (dd,  $J_{C-F} = 38.2, 32.3$  Hz), 50.2, 50.1, 30.1, 19.2, 13.6.  $^{19}\text{F}$  NMR (376 MHz,  $\text{CDCl}_3$ )  $\delta$  -119.2 (d,  $J = 295.9$  Hz, 1F), -123.1 (d,  $J = 296.3$  Hz, 1F). HRMS (ESI)  $m/z$  calcd for  $\text{C}_{24}\text{H}_{22}\text{F}_2\text{N}_2\text{NaO}_4\text{S}$   $[\text{M}+\text{Na}]^+$ : 495.1161, found 495.1161.

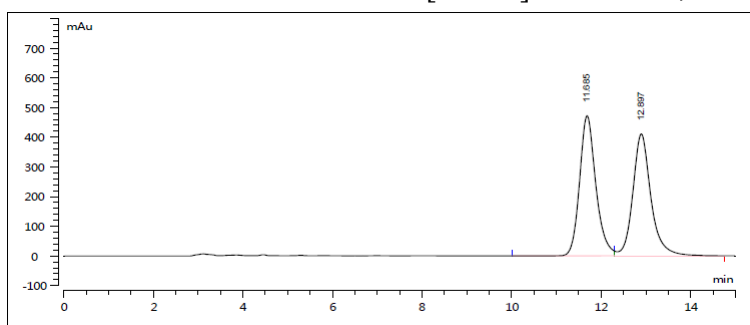

| No | Retention Time | Area      | % Area | Int Type |
|----|----------------|-----------|--------|----------|
| 1  | 11.685         | 11887.717 | 50.702 | BB       |
| 2  | 12.897         | 11558.688 | 49.298 | BB       |

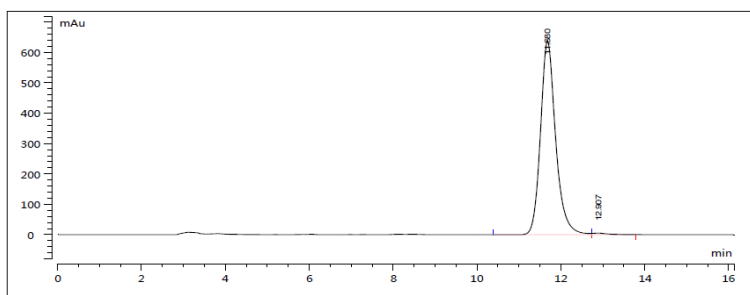

| No | Retention Time | Area      | % Area | Int Type |
|----|----------------|-----------|--------|----------|
| 1  | 11.680         | 16004.794 | 99.312 | BB       |
| 2  | 12.907         | 110.828   | 0.688  | BB       |

### Ethyl-(2*S*,3'*S*,4*S*,5'*S*)-5'-(difluoromethyl)-7'-methoxy-1'-methyl-2'',3-dioxo-3*H*-dispiro[benzo[*b*]thiophene-2,2'-pyrrolidine-3',3'-indoline]-4'-carboxylate

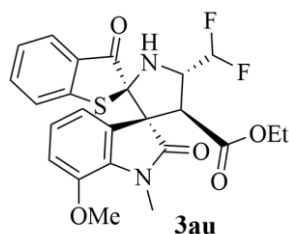

From 22.7 mg (0.1 mmol) of (*Z*)-2-((2,2-difluoroethyl)imino)benzo[*b*]thiophen-3(2*H*)-one **1a** and 31.3 mg (0.12 mmol, 1.2 equiv) of methyleneindolinone **2u**, 45.0 mg (92% yield) of compound **3au** was obtained as a white solid,  $[\alpha]_{\text{D}}^{24} = -470$  ( $c = 1.0, \text{CHCl}_3$ ), Mp. = 178-179 °C. Dr (> 20:1) was determined by HPLC analysis. 99% ee was determined by

HPLC analysis (Daicel Chiralpak IA column, 230 nm, hexane/2-propanol 80:20, 1.0 mL/min). Retention time:  $t_{\text{major}} = 22.9$  min,  $t_{\text{minor}} = 15.8$  min.  $^1\text{H}$  NMR (400 MHz,  $\text{CDCl}_3$ )  $\delta$  7.72 (dd,  $J = 7.7, 0.7$  Hz, 1H), 7.43 (td,  $J = 7.9, 1.3$  Hz, 1H), 7.21 – 7.11 (m, 1H), 7.10 – 6.92 (m, 4H), 6.58 (ddd,  $J = 58.2, 56.7, 7.1$  Hz, 1H), 4.60 – 4.41 (m, 1H), 4.25 (d,  $J = 8.1$  Hz, 1H), 3.92 – 3.80 (m, 4H), 3.72 (tt,  $J = 10.7, 7.0$  Hz, 1H), 3.35 (s, 3H), 2.72 (d,  $J = 1.7$  Hz, 1H), 0.80 (t,  $J = 7.1$  Hz, 3H).  $^{13}\text{C}\{^1\text{H}\}$  NMR (101 MHz,  $\text{CDCl}_3$ )  $\delta$  202.5,

171.6, 167.6, 147.8, 145.2, 136.3, 132.0, 129.8, 128.9, 127.3, 125.6, 123.7, 123.2, 117.5 (dd,  $J_{C-F} = 330.9, 323.6$  Hz) 116.7, 113.6, 86.6, 62.6, 62.6, 60.9, 59.56 (dd,  $J_{C-F} = 38.2, 32.3$  Hz) 55.9, 50.1, 50.0, 30.1, 13.5.  $^{19}F$  NMR (376 MHz,  $CDCl_3$ )  $\delta$  -119.3 (d,  $J = 295.6$  Hz, 1F), -123.1 (d,  $J = 295.9$  Hz, 1F). HRMS (ESI)  $m/z$  calcd for  $C_{24}H_{22}F_2N_2NaO_5S$   $[M+Na]^+$ : 511.1110, found 511.1110.

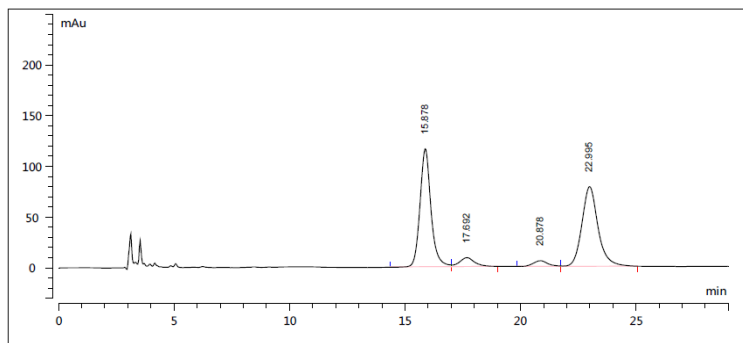

| No | Retention Time | Area     | % Area | Int Type |
|----|----------------|----------|--------|----------|
| 1  | 15.878         | 3799.750 | 46.100 | BB       |
| 2  | 17.692         | 388.967  | 4.719  | BB       |
| 3  | 20.878         | 243.088  | 2.949  | BB       |
| 4  | 22.995         | 3810.651 | 46.232 | BB       |

| No | Retention Time | Area     | % Area | Int Type |
|----|----------------|----------|--------|----------|
| 1  | 15.878         | 3799.750 | 49.980 | BB       |
| 2  | 22.995         | 3810.651 | 50.232 | BB       |

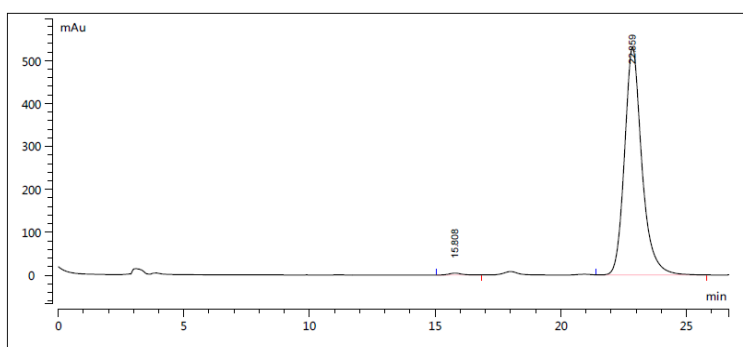

| No | Retention Time | Area      | % Area | Int Type |
|----|----------------|-----------|--------|----------|
| 1  | 15.808         | 138.953   | 0.544  | BB       |
| 2  | 22.859         | 25391.618 | 99.456 | BB       |

**Ethyl-(2*S*,3'*S*,4'*S*,5'*S*)-5'-(difluoromethyl)-5'',6''-difluoro-1''-methyl-2'',3-dioxo-3H-dispiro[benzo[*b*]thiophene-2,2'-pyrrolidine-3',3''-indoline]-4'-carboxylate**



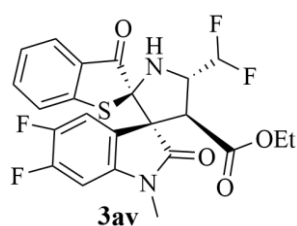

From 22.7 mg (0.1 mmol) of (Z)-2-((2,2-difluoroethyl)imino) benzo[*b*]thiophen-3(2H)-one **1a** and 32.0 mg (0.12 mmol, 1.2 equiv) of methyleneindolinone **2v**, 42.2 mg (86% yield) of compound **3av** was obtained as a white solid,  $[\alpha]_D^{25} = -375$  ( $c = 1.0$ ,  $\text{CHCl}_3$ ), Mp. = 80-81 °C. Dr (> 20:1) was determined by HPLC analysis. 98% ee was determined by HPLC analysis (Daicel Chiralpak IA column, 230 nm, hexane/2-propanol 50:50, 1.0 mL/min). Retention time:  $t_{\text{major}} = 7.5$  min,  $t_{\text{minor}} = 6.0$  min.  $^1\text{H}$  NMR (400 MHz,  $\text{CDCl}_3$ )  $\delta$  7.83 – 7.64 (m, 1H), 7.47 (td,  $J = 7.9, 1.3$  Hz, 1H), 7.34 (dd,  $J = 9.2, 7.7$  Hz, 1H), 7.23 – 7.14 (m, 1H), 7.04 (d,  $J = 7.9$  Hz, 1H), 6.78 – 6.37 (m, 2H), 4.58 – 4.34 (m, 1H), 4.27 (d,  $J = 8.1$  Hz, 1H), 3.87 (dq,  $J = 10.9, 7.1$  Hz, 1H), 3.77 (dq,  $J = 10.8, 7.1$  Hz, 1H), 3.07 (s, 3H), 2.73 (s, 1H), 0.84 (t,  $J = 7.1$  Hz, 3H).  $^{13}\text{C}\{^1\text{H}\}$  NMR (101 MHz,  $\text{CDCl}_3$ )  $\delta$  202.1, 171.3, 167.3, 152.7, 152.6, 150.3, 150.1, 147.8, 147.7, 147.5, 145.4, 145.3, 140.8, 140.7, 140.7, 140.6, 136.6, 128.7, 127.3, 125.8, 123.6, 123.6, 123.6, 123.5, 123.3, 117.2 (dd,  $J_{\text{C-F}} = 331.4, 323.6$  Hz), 114.6, 114.4, 98.6, 98.3, 86.4, 62.4, 61.2, 59.24 (dd,  $J_{\text{C-F}} = 38.4, 32.7$  Hz), 49.5, 49.4, 26.9, 13.7.  $^{19}\text{F}$  NMR (376 MHz,  $\text{CDCl}_3$ )  $\delta$  -119.3 (d,  $J = 297.7$  Hz, 1F), -122.8 (d,  $J = 297.5$  Hz, 1F), -133.6 (d,  $J = 37.6$  Hz, 1F), -144.1 (d,  $J = 37.6$  Hz, 1F). HRMS (ESI)  $m/z$  calcd for  $\text{C}_{23}\text{H}_{18}\text{F}_4\text{N}_2\text{NaO}_4\text{S}$   $[\text{M}+\text{Na}]^+$ : 517.0816, found 517.0816.

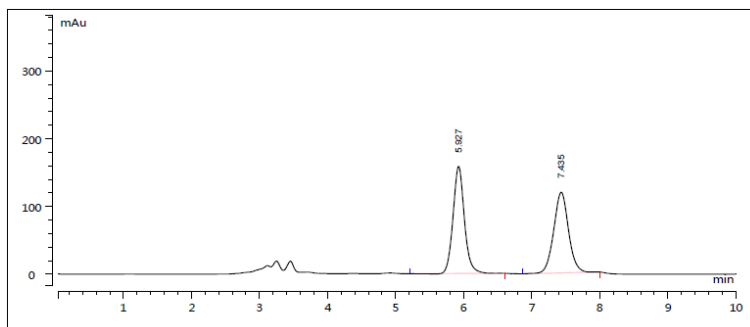

| No | Retention Time | Area     | % Area | Int Type |
|----|----------------|----------|--------|----------|
| 1  | 5.927          | 1835.977 | 50.465 | BB       |
| 2  | 7.435          | 1802.113 | 49.535 | BB       |

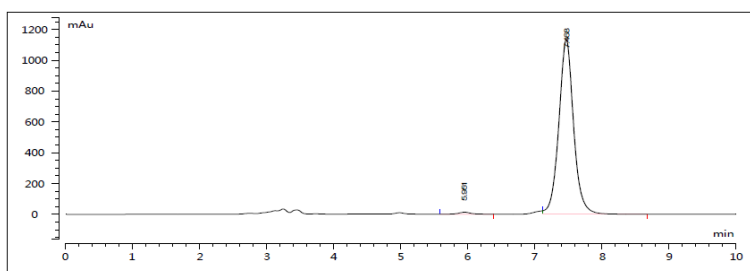

| No | Retention Time | Area      | % Area | Int Type |
|----|----------------|-----------|--------|----------|
| 1  | 5.951          | 161.553   | 0.919  | BB       |
| 2  | 7.468          | 17409.294 | 99.081 | BB       |

**Ethyl-(2*S*,3'*S*,4'*S*,5'*S*)-7'-bromo-5'-(difluoromethyl)-1'',5''-dimethyl-2'',3-dioxo-**

### 3H-dispiro[benzo[*b*]thiophene-2,2'-pyrrolidine-3',3''-indoline]-4'-carboxylate

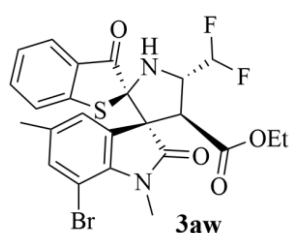

From 22.7 mg (0.1 mmol) of (Z)-2-((2,2-difluoroethyl)imino) benzo[*b*]thiophen-3(2H)-one **1a** and 38.8 mg (0.12 mmol, 1.2 equiv) of methyleneindolinone **2w**, 53.6 mg (97% yield) of compound **3aw** was obtained as a yellow solid,  $[\alpha]_D^{25} = -400$  ( $c = 1.0$ ,  $\text{CHCl}_3$ ), Mp. = 79-80 °C. Dr (> 20:1) was determined by HPLC analysis. 99% ee was determined by HPLC analysis

(Daicel Chiralcel OD-H column, 230 nm, hexane/2-propanol 80:20, 1.0 mL/min). Retention time:  $t_{\text{major}} = 12.1$  min,  $t_{\text{minor}} = 10.1$  min.  $^1\text{H NMR}$  (400 MHz,  $\text{CDCl}_3$ )  $\delta$  7.84 – 7.61 (m, 1H), 7.44 (ddd,  $J = 15.8, 11.2, 1.5$  Hz, 2H), 7.28 (s, 1H), 7.24 – 7.11 (m, 1H), 7.04 (d,  $J = 7.9$  Hz, 1H), 6.59 (ddd,  $J = 58.1, 56.8, 7.1$  Hz, 1H), 4.58 – 4.36 (m, 1H), 4.24 (d,  $J = 8.1$  Hz, 1H), 3.91 (dq,  $J = 10.8, 7.1$  Hz, 1H), 3.77 (dq,  $J = 10.8, 7.1$  Hz, 1H), 3.34 (s, 3H), 2.70 (s, 1H), 2.53 (s, 3H), 0.83 (t,  $J = 7.1$  Hz, 3H).  $^{13}\text{C}\{^1\text{H}\}$  NMR (101 MHz,  $\text{CDCl}_3$ )  $\delta$  202.3, 171.8, 167.3, 147.6, 141.1, 136.4, 136.1, 130.8, 128.8, 127.3, 125.7, 125.0, 123.3, 121.5, 117.4 (dd,  $J_{\text{C-F}} = 331.3, 323.7$  Hz), 115.4, 86.5, 62.0, 61.1, 59.3 (dd,  $J_{\text{C-F}} = 38.4, 32.6$  Hz), 50.0, 49.9, 30.1, 18.9, 13.7.  $^{19}\text{F NMR}$  (376 MHz,  $\text{CDCl}_3$ )  $\delta$  -119.2 (d,  $J = 297.1$  Hz, 1F), -123.0 (d,  $J = 297.1$  Hz, 1F). HRMS (ESI)  $m/z$  calcd for  $\text{C}_{24}\text{H}_{21}\text{BrF}_2\text{N}_2\text{NaO}_4\text{S}$   $[\text{M}+\text{Na}]^+$ : 573.0266, found 573.0266.

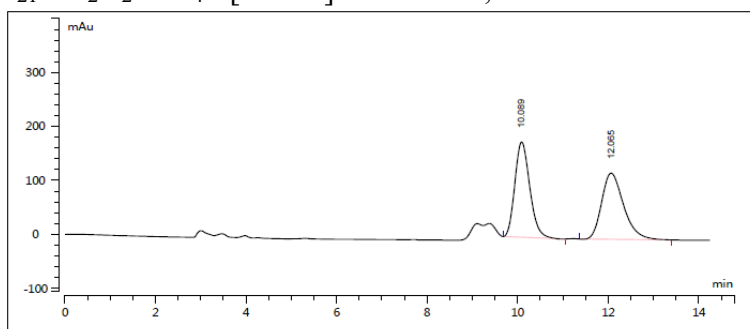

| No | Retention Time | Area     | % Area | Int Type |
|----|----------------|----------|--------|----------|
| 1  | 10.089         | 4041.165 | 49.447 | BB       |
| 2  | 12.065         | 4131.477 | 50.553 | BB       |

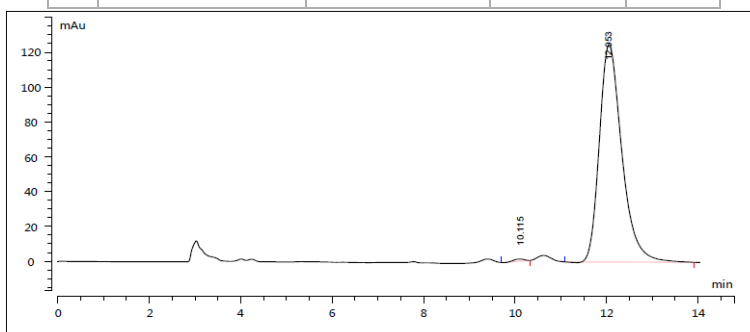

| No | Retention Time | Area     | % Area | Int Type |
|----|----------------|----------|--------|----------|
| 1  | 10.115         | 18.181   | 0.424  | BB       |
| 2  | 12.053         | 4274.499 | 99.576 | BB       |

### Ethyl-(2*S*,3'*S*,4'*S*,5'*S*)-5-bromo-5'-(difluoromethyl)-1''-methyl-2'',3-dioxo-3H-

### dispiro[benzo[*b*]thiophene-2,2'-pyrrolidine-3',3''-indoline]-4'-carboxylate

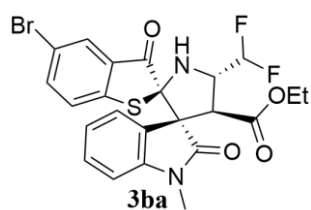

From 30.5 mg (0.1 mmol) of (*Z*)-2-((2,2-difluoroethyl)imino)benzo[*b*]thiophen-3(2*H*)-one **1b** and 27.7 mg (0.12 mmol, 1.2 equiv) of methyleneindolinone **2a**, 42.8 mg (80% yield) of compound **3ba** was obtained as a yellow solid,  $[\alpha]_D^{25} = -409$  ( $c = 1.0$ ,  $\text{CHCl}_3$ ), Mp. = 191-192 °C. Dr (> 20:1) was determined by HPLC analysis. 99% ee was determined by

HPLC analysis (Daicel Chiralpak IB column, 230 nm, hexane/2-propanol 75:25, 1.0 mL/min). Retention time:  $t_{\text{major}} = 14.0$  min,  $t_{\text{minor}} = 12.6$  min.  $^1\text{H NMR}$  (400 MHz,  $\text{CDCl}_3$ )  $\delta$  7.82 (d,  $J = 2.0$  Hz, 1H), 7.52 (dd,  $J = 8.4, 2.1$  Hz, 1H), 7.40 (dd,  $J = 12.1, 4.4$  Hz, 2H), 7.18 – 7.07 (m, 1H), 6.87 (dd,  $J = 14.1, 8.0$  Hz, 2H), 6.55 (ddd,  $J = 58.1, 56.6, 7.1$  Hz, 1H), 4.61 – 4.44 (m, 1H), 4.23 (d,  $J = 8.1$  Hz, 1H), 3.80 (dq,  $J = 10.8, 7.1$  Hz, 1H), 3.69 (dq,  $J = 10.8, 7.1$  Hz, 1H), 3.12 (s, 3H), 2.77 (s, 1H), 0.74 (t,  $J = 7.1$  Hz, 3H).  $^{13}\text{C}\{^1\text{H}\}$  NMR (101 MHz,  $\text{CDCl}_3$ )  $\delta$  201.4, 171.4, 167.4, 146.5, 144.1, 139.0, 130.4, 130.1, 129.9, 128.2, 124.6, 124.2, 123.3, 119.8, 117.3 (dd,  $J_{\text{C-F}} = 331.1, 323.7$  Hz), 108.2, 87.3, 62.6, 61.1, 59.57 (dd,  $J_{\text{C-F}} = 38.4, 32.5$  Hz), 49.7, 49.6, 26.7, 13.6.  $^{19}\text{F NMR}$  (376 MHz,  $\text{CDCl}_3$ )  $\delta$  -119.3 (d,  $J = 296.7$  Hz, 1F), -123.0 (d,  $J = 296.3$  Hz, 1F). HRMS (ESI)  $m/z$  calcd for  $\text{C}_{23}\text{H}_{19}\text{BrF}_2\text{N}_2\text{NaO}_4\text{S}$   $[\text{M}+\text{Na}]^+$ : 559.0109, found 559.0109.

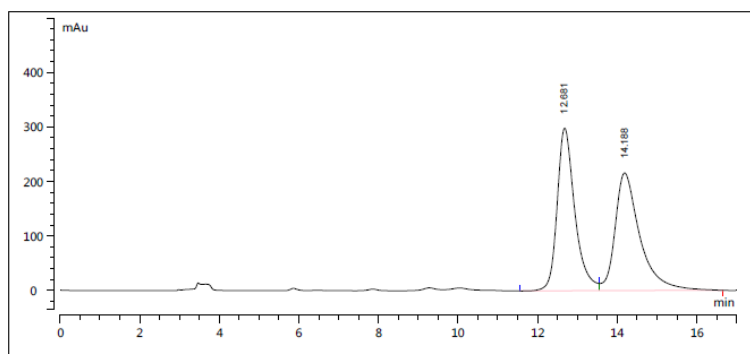

| No | Retention Time | Area     | % Area | Int Type |
|----|----------------|----------|--------|----------|
| 1  | 12.681         | 9226.288 | 49.665 | BB       |
| 2  | 14.188         | 9350.868 | 50.335 | BB       |

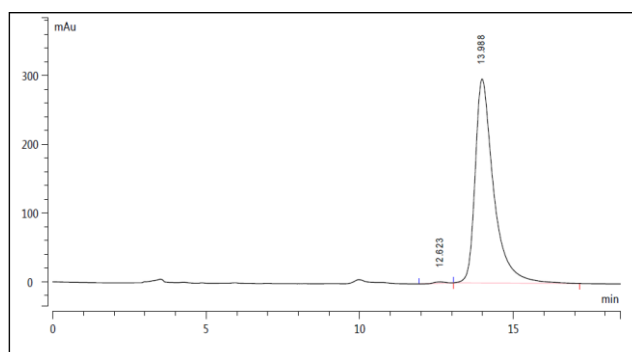

| No | Retention Time | Area      | % Area | Int Type |
|----|----------------|-----------|--------|----------|
| 1  | 12.623         | 45.536    | 0.366  | BB       |
| 2  | 13.988         | 12401.307 | 99.634 | BB       |

**Ethyl-(2*S*,3'*S*,4'*S*,5'*S*)-5-(tert-butyl)-5'-(difluoromethyl)-1''-methyl-2'',3-dioxo-3H-dispiro[benzo[*b*]thiophene-2,2'-pyrrolidine-3',3''-indoline]-4'-carboxylate**

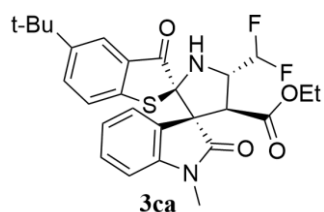

From 28.3 mg (0.1 mmol) of (*Z*)-2-((2,2-difluoroethyl)imino)benzo[*b*]thiophen-3(2*H*)-one **1c** and 27.7 mg (0.12 mmol, 1.2 equiv) of methyleneindolinone **2a**, 49.0 mg (95% yield) of compound **3ca** was obtained as a white solid,  $[\alpha]_D^{25} = -368$  ( $c = 1.0$ ,  $\text{CHCl}_3$ ), Mp. = 214–215 °C. Dr (> 20:1) was determined by HPLC analysis. 99%

ee was determined by HPLC analysis (Daicel Chiralpak IB column, 230 nm, hexane/2-propanol 87:13, 1.0 mL/min). Retention time:  $t_{\text{major}} = 8.1$  min,  $t_{\text{minor}} = 9.9$  min.  $^1\text{H NMR}$  (400 MHz,  $\text{CDCl}_3$ )  $\delta$  7.74 (d,  $J = 2.0$  Hz, 1H), 7.52 (dd,  $J = 8.3, 2.1$  Hz, 1H), 7.47 – 7.35 (m, 2H), 7.20 – 7.05 (m, 1H), 6.95 (d,  $J = 8.3$  Hz, 1H), 6.85 (d,  $J = 7.8$  Hz, 1H), 6.55 (ddd,  $J = 58.2, 56.8, 7.1$  Hz, 1H), 4.65 – 4.47 (m, 1H), 4.37 (d,  $J = 8.0$  Hz, 1H), 3.80 (dq,  $J = 10.8, 7.1$  Hz, 1H), 3.70 (dq,  $J = 10.8, 7.1$  Hz, 1H), 3.13 (s, 3H), 2.76 (s, 1H), 1.30 (s, 9H), 0.74 (t,  $J = 7.1$  Hz, 3H).  $^{13}\text{C}\{^1\text{H}\}$  NMR (101 MHz,  $\text{CDCl}_3$ )  $\delta$  202.3, 171.5, 167.7, 149.1, 145.2, 144.1, 134.5, 129.9, 128.5, 128.5, 124.2, 123.8, 123.1, 122.9, 117.4 (dd,  $J_{\text{C-F}} = 330.6, 323.9$  Hz), 108.0, 86.7, 62.2, 61.0, 59.8 (dd,  $J_{\text{C-F}} = 38.2, 32.3$  Hz), 50.0, 49.9, 34.6, 31.1, 26.7, 13.6.  $^{19}\text{F NMR}$  (376 MHz,  $\text{CDCl}_3$ )  $\delta$  -119.4 (d,  $J = 295.2$  Hz, 1F), -123.0 (d,  $J = 295.2$  Hz, 1F). HRMS (ESI)  $m/z$  calcd for  $\text{C}_{27}\text{H}_{28}\text{F}_2\text{N}_2\text{NaO}_4\text{S}$   $[\text{M}+\text{Na}]^+$ : 537.1630, found 537.1630.

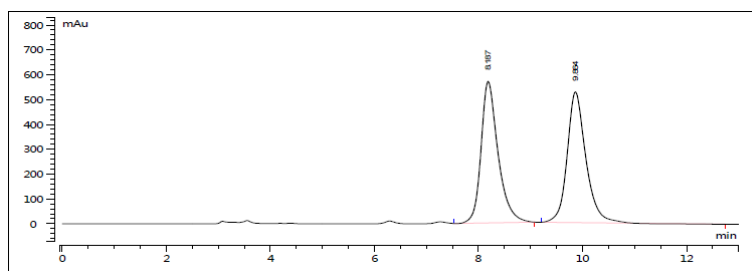

| No | Retention Time | Area      | % Area | Int Type |
|----|----------------|-----------|--------|----------|
| 1  | 8.187          | 12923.523 | 49.731 | BB       |
| 2  | 9.864          | 13063.206 | 50.269 | BB       |

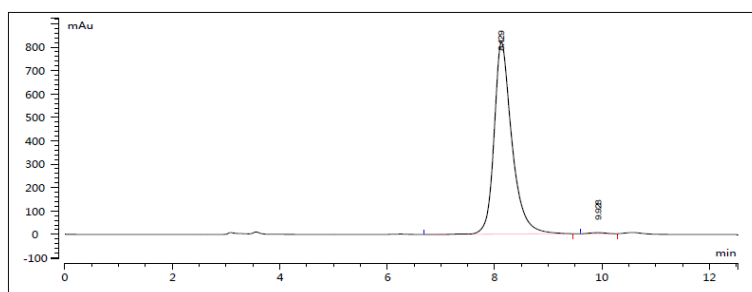

| No | Retention Time | Area      | % Area | Int Type |
|----|----------------|-----------|--------|----------|
| 1  | 8.129          | 18856.281 | 99.532 | BB       |
| 2  | 9.928          | 88.682    | 0.468  | BB       |

**Ethyl-(2*S*,3'*S*,4'*S*,5'*S*)-5'-(difluoromethyl)-6-fluoro-1''-methyl-2'',3-dioxo-3H-**

**dispiro[benzo[*b*]thiophene-2,2'-pyrrolidine-3',3''-indoline]-4'-carboxylate**

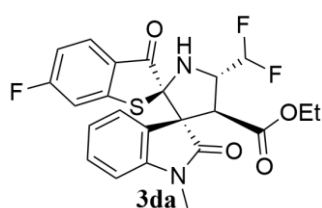

From 24.5 mg (0.1 mmol) of (*Z*)-2-((2,2-difluoroethyl)imino)benzo[*b*]thiophen-3(2*H*)-one **1d** and 27.7 mg (0.12 mmol, 1.2 equiv) of methyleneindolinone **2a**, 43.5 mg (90% yield) of compound **3da** was obtained as a white solid,  $[\alpha]_D^{25} = -381$  ( $c = 1.0$ ,  $\text{CHCl}_3$ ), Mp. = 184–185 °C. Dr (> 20:1) was determined by HPLC analysis. 99%

ee was determined by HPLC analysis (Daicel Chiralpak IA-3 column, 230 nm, hexane/2-propanol 80:20, 1.0 mL/min). Retention time:  $t_{\text{major}} = 24.5$  min,  $t_{\text{minor}} = 19.4$  min.  $^1\text{H}$  NMR (400 MHz,  $\text{CDCl}_3$ )  $\delta$  7.74 (dd,  $J = 8.5, 5.5$  Hz, 1H), 7.41 (ddd,  $J = 8.8, 6.1, 2.2$  Hz, 2H), 7.13 (dd,  $J = 11.1, 4.1$  Hz, 1H), 6.89 – 6.81 (m, 2H), 6.74 – 6.39 (m, 2H), 4.54 (td,  $J = 12.0, 7.0$  Hz, 1H), 4.26 (d,  $J = 8.1$  Hz, 1H), 3.80 (dq,  $J = 10.8, 7.1$  Hz, 1H), 3.69 (dq,  $J = 10.8, 7.1$  Hz, 1H), 3.12 (s, 3H), 2.78 (s, 1H), 0.74 (t,  $J = 7.1$  Hz, 3H).  $^{13}\text{C}\{^1\text{H}\}$  NMR (101 MHz,  $\text{CDCl}_3$ )  $\delta$  200.5, 171.4, 169.2, 167.5, 166.7, 150.7, 150.6, 144.1, 130.1, 129.7, 129.6, 128.2, 125.3, 125.3, 124.2, 123.3, 117.4 (dd,  $J_{\text{C-F}} = 331.0, 323.7$  Hz), 114.0, 113.7, 110.5, 110.2, 108.1, 87.4, 62.5, 61.0, 59.6 (dd,  $J_{\text{C-F}} = 38.4, 32.5$  Hz), 49.7, 49.6, 26.7, 13.6.  $^{19}\text{F}$  NMR (376 MHz,  $\text{CDCl}_3$ )  $\delta$  -99.1, -119.0 (d,  $J = 295.6$  Hz, 1F), -123.0 (d,  $J = 296.3$  Hz, 1F). HRMS (ESI)  $m/z$  calcd for  $\text{C}_{23}\text{H}_{19}\text{F}_3\text{N}_2\text{NaO}_4\text{S}$   $[\text{M}+\text{Na}]^+$ : 499.0910, found 499.0910.

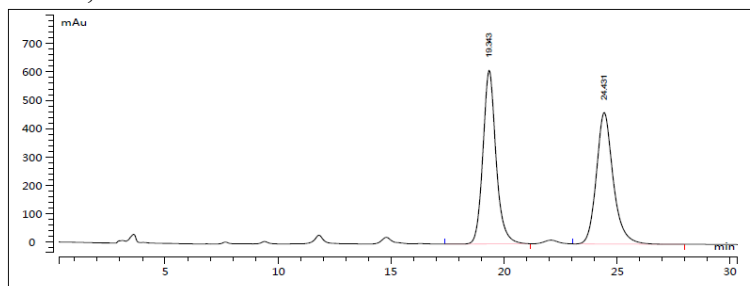

| No | Retention Time | Area      | % Area | Int Type |
|----|----------------|-----------|--------|----------|
| 1  | 19.343         | 24682.401 | 50.724 | BB       |
| 2  | 24.431         | 23977.865 | 49.276 | BB       |

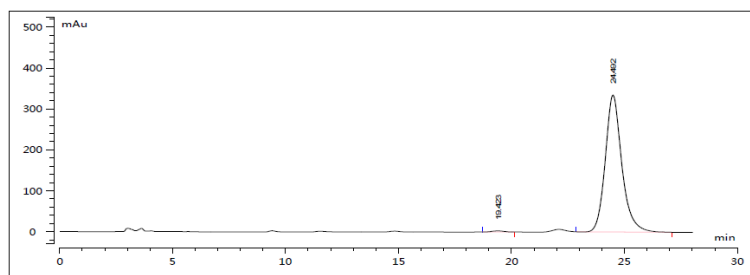

| No | Retention Time | Area      | % Area | Int Type |
|----|----------------|-----------|--------|----------|
| 1  | 19.423         | 98.808    | 0.575  | BB       |
| 2  | 24.492         | 17082.092 | 99.425 | BB       |

**Ethyl-(2*S*,3'*S*,4*S*,5'*S*)-6-chloro-5'-(difluoromethyl)-1''-methyl-2'',3-dioxo-3*H*-dispiro[benzo[*b*]thiophene-2,2'-pyrrolidine-3',3''-indoline]-4'-carboxylate**

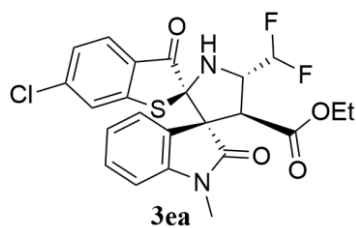

From 26.1 mg (0.1 mmol) of (Z)-2-((2,2-difluoroethyl)imino)benzo[*b*]thiophen-3(2H)-one **1e** and 27.7 mg (0.12 mmol, 1.2 equiv) of methyleneindolinone **2a**, 42.3 mg (86% yield) of compound **3ea** was obtained as a white solid,  $[\alpha]_D^{25} = -510$  ( $c = 1.0$ ,  $\text{CHCl}_3$ ), Mp. = 167-168 °C. Dr (> 20:1) was determined by HPLC

analysis. 97% ee was determined by HPLC analysis (Daicel Chiralpak IA-3 column, 230 nm, hexane/2-propanol 50:50, 1.0 mL/min). Retention time:  $t_{\text{major}} = 7.3$  min,  $t_{\text{minor}} = 5.5$  min.  $^1\text{H}$  NMR (400 MHz,  $\text{CDCl}_3$ )  $\delta$  7.40 (ddd,  $J = 13.0, 6.4, 2.4$  Hz, 2H), 7.32 (t,  $J = 7.9$  Hz, 1H), 7.14 (t,  $J = 7.6$  Hz, 2H), 6.94 – 6.87 (m, 1H), 6.87 – 6.51 (m, 2H), 4.53 (ddd,  $J = 11.9, 9.6, 6.4$  Hz, 1H), 4.21 (d,  $J = 8.2$  Hz, 1H), 3.77 (ddd,  $J = 10.6, 9.0, 5.3$  Hz, 1H), 3.70 (ddd,  $J = 17.9, 8.9, 5.3$  Hz, 1H), 3.09 (s, 3H), 2.69 (s, 1H), 0.75 (t,  $J = 7.1$  Hz, 3H).  $^{13}\text{C}\{^1\text{H}\}$  NMR (101 MHz,  $\text{CDCl}_3$ )  $\delta$  200.7, 171.5, 167.4, 149.5, 144.2, 135.9, 135.0, 130.0, 128.0, 127.6, 124.7, 124.4, 123.3, 121.7, 117.5 (dd,  $J_{\text{C-F}} = 331.3, 323.6$  Hz), 108.1, 87.0, 63.0, 61.0, 59.46 (dd,  $J_{\text{C-F}} = 38.4, 32.5$  Hz), 49.6, 49.5, 26.7, 13.6.  $^{19}\text{F}$  NMR (376 MHz,  $\text{CDCl}_3$ )  $\delta$  -119.1 (d,  $J = 297.5$  Hz, 1F), -122.7 (d,  $J = 298.0$  Hz, 1F). HRMS (ESI)  $m/z$  calcd for  $\text{C}_{23}\text{H}_{19}\text{ClF}_2\text{N}_2\text{NaO}_4\text{S}$   $[\text{M}+\text{Na}]^+$ : 515.0614, found 515.0614.

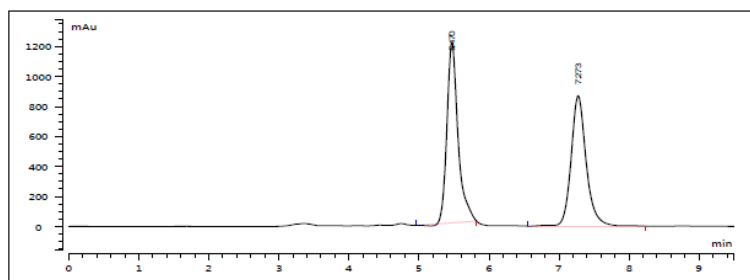

| No | Retention Time | Area      | % Area | Int Type |
|----|----------------|-----------|--------|----------|
| 1  | 5.470          | 13177.002 | 50.291 | BB       |
| 2  | 7.273          | 13024.760 | 49.709 | BB       |

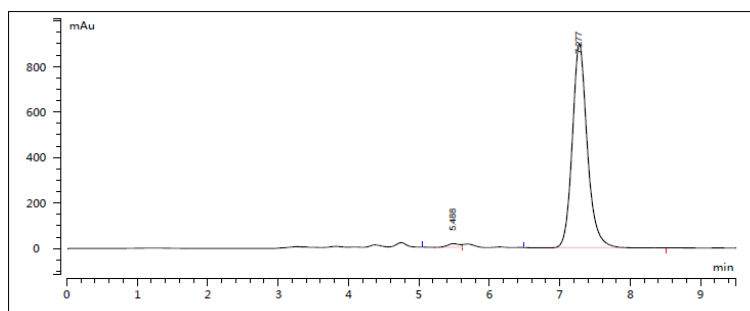

| No | Retention Time | Area      | % Area | Int Type |
|----|----------------|-----------|--------|----------|
| 1  | 5.488          | 172.437   | 1.290  | BB       |
| 2  | 7.277          | 13194.459 | 98.710 | BB       |

**Ethyl-(2*S*,3'*S*,4*S*,5'*S*)-6-bromo-5'-(difluoromethyl)-1'-methyl-2'',3-dioxo-3*H*-dispiro[benzo[*b*]thiophene-2,2'-pyrrolidine-3',3''-indoline]-4'-carboxylate**

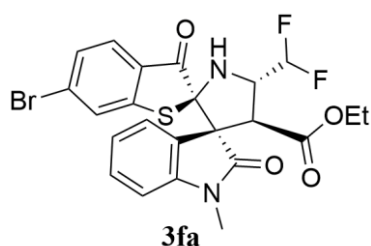

From 30.5 mg (0.1 mmol) of (Z)-2-((2,2-difluoroethyl)imino)benzo[*b*]thiophen-3(2H)-one **1f** and 27.7 mg (0.12 mmol, 1.2 equiv) of methyleneindolinone **2a**, 47.7 mg (89% yield) of compound **3fa** was obtained as a yellow solid,  $[\alpha]_D^{25} = -544$  ( $c = 1.0$ ,  $\text{CHCl}_3$ ), Mp. = 207-208 °C. Dr (> 20:1) was determined by HPLC analysis. 98% ee was

determined by HPLC analysis (Daicel Chiralpak IA-3 column, 230 nm, hexane/2-propanol 80:20, 1.0 mL/min). Retention time:  $t_{\text{major}} = 19.8$  min,  $t_{\text{minor}} = 12.3$  min.  $^1\text{H}$  NMR (400 MHz,  $\text{CDCl}_3$ )  $\delta$  7.46 – 7.31 (m, 3H), 7.24 (dd,  $J = 16.2, 8.4$  Hz, 1H), 7.14 (t,  $J = 7.6$  Hz, 1H), 6.95 (d,  $J = 7.8$  Hz, 1H), 6.89 – 6.49 (m, 2H), 4.59 – 4.46 (m, 1H), 4.21 (d,  $J = 8.2$  Hz, 1H), 3.83 – 3.73 (m, 1H), 3.69 (ddd,  $J = 14.3, 8.5, 4.9$  Hz, 1H), 3.09 (s, 3H), 2.71 (s, 1H), 0.74 (t,  $J = 7.1$  Hz, 3H).  $^{13}\text{C}$   $\{^1\text{H}\}$  NMR (101 MHz,  $\text{CDCl}_3$ )  $\delta$  201.0, 171.5, 167.4, 150.0, 144.2, 136.0, 130.9, 130.0, 128.0, 125.9, 124.4, 123.3, 123.0, 122.3, 117.54 (dd,  $J_{\text{C-F}} = 331.3, 323.6$  Hz), 108.1, 87.1, 68.5, 63.1, 61.0, 59.44 (dd,  $J_{\text{C-F}} = 38.2, 32.5$  Hz), 49.6, 49.5, 26.7, 13.6.  $^{19}\text{F}$  NMR (376 MHz,  $\text{CDCl}_3$ )  $\delta$  -117.1 (d,  $J = 298.0$  Hz, 1F), -122.7 (d,  $J = 298.0$  Hz, 1F). HRMS (ESI)  $m/z$  calcd for  $\text{C}_{23}\text{H}_{19}\text{BrF}_2\text{N}_2\text{NaO}_4\text{S}$   $[\text{M}+\text{Na}]^+$ : 560.0109, found 561.0109.

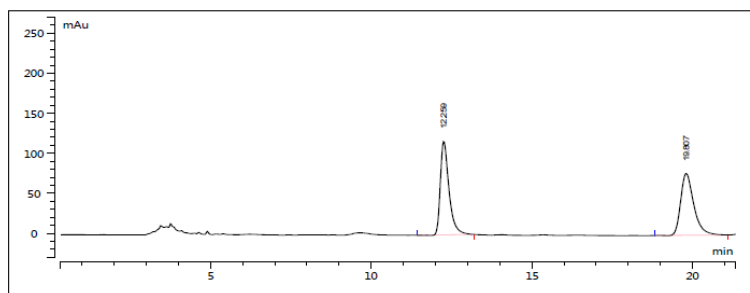

| No | Retention Time | Area     | % Area | Int Type |
|----|----------------|----------|--------|----------|
| 1  | 12.259         | 2188.295 | 50.009 | BB       |
| 2  | 19.807         | 2187.504 | 49.991 | BB       |

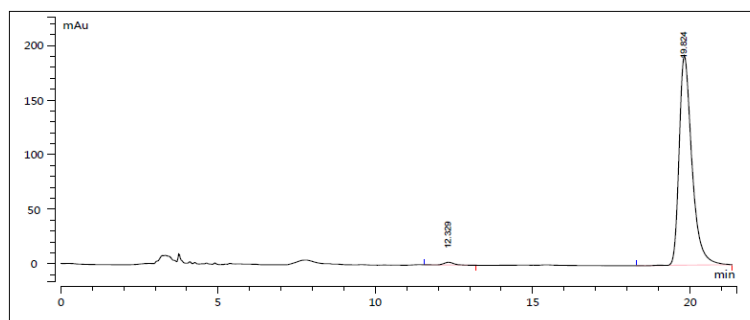

| No | Retention Time | Area     | % Area | Int Type |
|----|----------------|----------|--------|----------|
| 1  | 12.329         | 54.159   | 0.995  | BB       |
| 2  | 19.824         | 5391.182 | 99.005 | BB       |

**Ethyl-(2*S*,3'*S*,4'*S*,5'*S*)-5'-(difluoromethyl)-6-methoxy-1''-methyl-2'',3-dioxo-3H-**

**dispiro[benzo[*b*]thiophene-2,2'-pyrrolidine-3',3''-indoline]-4'-carboxylate**

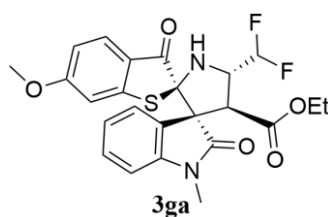

From 25.7 mg (0.1 mmol) of (*Z*)-2-((2,2-difluoroethyl)imino)benzo[*b*]thiophen-3(2H)-one **1g** and 27.7 mg (0.12 mmol, 1.2 equiv) of methyleneindolinone **2a**, 34.2 mg (70% yield) of compound **3ga** was obtained as a white solid,  $[\alpha]_D^{25} = -300$  ( $c = 1.0$ ,  $\text{CHCl}_3$ ), Mp. = 177-178 °C. Dr ( $> 20:1$ ) was determined by HPLC analysis. 90%

ee was determined by HPLC analysis (Daicel Chiralpak IB column, 230 nm, hexane/2-propanol 50:50, 1.0 mL/min). Retention time:  $t_{\text{major}} = 8.4$  min,  $t_{\text{minor}} = 7.5$  min.  $^1\text{H}$  NMR (400 MHz,  $\text{CDCl}_3$ )  $\delta$  7.66 (d,  $J = 8.6$  Hz, 1H), 7.46 – 7.34 (m, 2H), 7.13 (t,  $J = 7.3$  Hz, 1H), 6.84 (d,  $J = 7.7$  Hz, 1H), 6.78 – 6.30 (m, 3H), 4.65 – 4.45 (m, 1H), 4.32 (d,  $J = 8.0$  Hz, 1H), 3.91 – 3.53 (m, 5H), 3.12 (s, 3H), 2.75 (s, 1H), 0.73 (t,  $J = 7.1$  Hz, 3H).  $^{13}\text{C}\{^1\text{H}\}$  NMR (101 MHz,  $\text{CDCl}_3$ )  $\delta$  199.9, 171.4, 167.7, 166.5, 150.8, 144.1, 129.9, 129.0, 128.5, 124.2, 123.1, 121.9, 117.5 (dd,  $J_{\text{C-F}} = 331.0, 323.5$  Hz), 113.3, 108.0, 107.1, 87.3, 62.3, 60.9, 59.6 (dd,  $J_{\text{C-F}} = 38.1, 32.5$  Hz), 55.8, 49.8, 49.7, 26.7, 13.6.  $^{19}\text{F}$  NMR (376 MHz,  $\text{CDCl}_3$ )  $\delta$  -119.4 (d,  $J = 298.0$  Hz, 1F), -123.1 (d,  $J = 298.0$  Hz, 1F). HRMS (ESI)  $m/z$  calcd for  $\text{C}_{24}\text{H}_{22}\text{F}_2\text{N}_2\text{NaO}_5\text{S}$   $[\text{M}+\text{Na}]^+$ : 511.1110, found 511.1110.

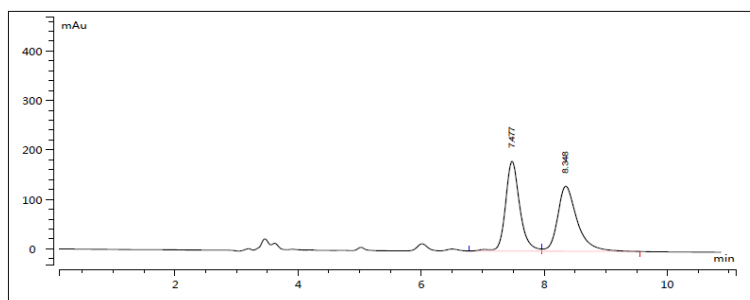

| No | Retention Time | Area     | % Area | Int Type |
|----|----------------|----------|--------|----------|
| 1  | 7.477          | 2929.285 | 50.234 | BB       |
| 2  | 8.348          | 2902.035 | 49.766 | BB       |

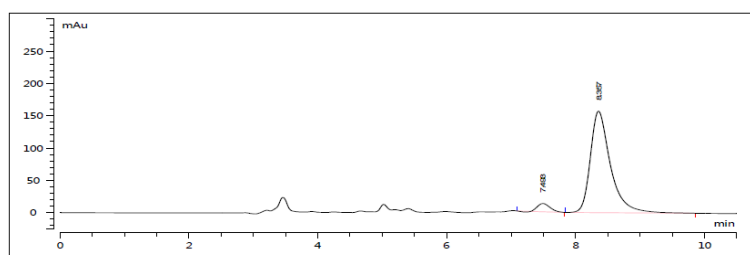

| No | Retention Time | Area     | % Area | Int Type |
|----|----------------|----------|--------|----------|
| 1  | 7.493          | 163.913  | 4.613  | BB       |
| 2  | 8.357          | 3389.025 | 95.387 | BB       |

**Ethyl-(2*S*,3'*S*,4'*S*,5'*S*)-5'-(difluoromethyl)-1'',7-dimethyl-2'',3-dioxo-3H-dispiro[benzo[*b*]thiophene-2,2'-pyrrolidine-3',3''-indoline]-4'-carboxylate**



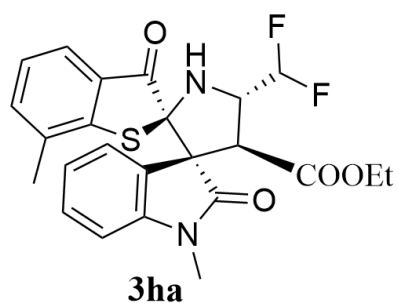

From 24.1 mg (0.1 mmol) of (Z)-2-((2,2-difluoroethyl)imino) benzo[*b*]thiophen-3(2H)-one **1h** and 27.7 mg (0.12 mmol, 1.2 equiv) of methyleneindolinone **2a**, 46.0 mg (97% yield) of compound **3ha** was obtained as a white solid,  $[\alpha]_D^{25} = -402$  ( $c = 1.0$ ,  $\text{CHCl}_3$ ), Mp. = 184-185 °C. Dr (> 20:1) was determined by HPLC analysis. 98% ee was determined by HPLC analysis (Daicel Chiralpak IB

column, 230 nm, hexane/2-propanol 87:13, 1.0 mL/min). Retention time:  $t_{\text{major}} = 16.9$  min,  $t_{\text{minor}} = 9.7$  min.  $^1\text{H}$  NMR (400 MHz,  $\text{CDCl}_3$ )  $\delta$  7.59 (d,  $J = 7.6$  Hz, 1H), 7.48 – 7.36 (m, 2H), 7.30 – 7.24 (m, 1H), 7.12 (dt,  $J = 15.3, 7.5$  Hz, 2H), 6.84 (d,  $J = 7.8$  Hz, 1H), 6.73 – 6.41 (m, 1H), 4.62 – 4.50 (m, 1H), 4.35 (d,  $J = 8.1$  Hz, 1H), 3.79 (dq,  $J = 10.9, 7.1$  Hz, 1H), 3.69 (dq,  $J = 10.8, 7.1$  Hz, 1H), 3.11 (s, 3H), 2.76 (s, 1H), 2.04 (s, 3H), 0.74 (t,  $J = 7.1$  Hz, 3H).  $^{13}\text{C}\{^1\text{H}\}$  NMR (101 MHz,  $\text{CDCl}_3$ )  $\delta$  202.7, 171.5, 167.7, 147.6, 144.1, 136.6, 132.4, 129.9, 128.7, 128.3, 125.7, 124.7, 124.2, 123.1, 117.41 (dd,  $J_{\text{C-F}} = 330.7, 323.7$  Hz), 108.1, 86.4, 62.4, 61.0, 59.68 (dd,  $J_{\text{C-F}} = 38.4, 32.5$  Hz), 50.0, 49.9, 26.7, 18.5, 13.6.  $^{19}\text{F}$  NMR (376 MHz,  $\text{CDCl}_3$ )  $\delta$  -119.4 (d,  $J = 295.6$  Hz, 1F), -123.0 (d,  $J = 295.9$  Hz, 1F). HRMS (ESI)  $m/z$  calcd for  $\text{C}_{24}\text{H}_{22}\text{F}_2\text{N}_2\text{NaO}_4\text{S}$   $[\text{M}+\text{Na}]^+$ : 495.1161, found 495.1161.

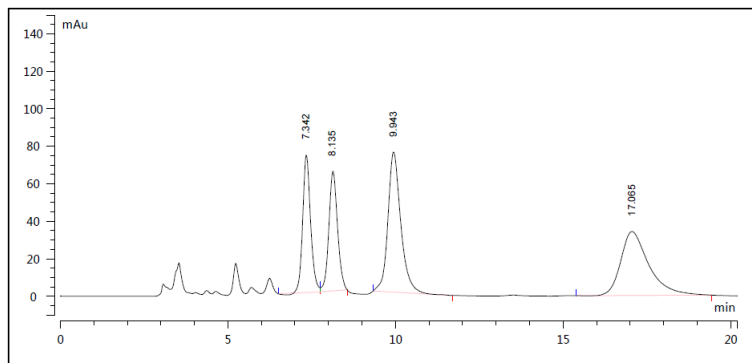

| No | Retention Time | Area     | % Area | Int Type |
|----|----------------|----------|--------|----------|
| 1  | 7.342          | 1191.394 | 18.842 | BB       |
| 2  | 8.135          | 1156.156 | 18.285 | BB       |
| 3  | 9.943          | 1993.866 | 31.533 | BB       |
| 4  | 17.065         | 1981.684 | 31.340 | BB       |

| No | Retention Time | Area     | % Area | Int Type |
|----|----------------|----------|--------|----------|
| 1  | 9.943          | 1993.866 | 50.153 | BB       |
| 2  | 17.065         | 1981.684 | 49.847 | BB       |

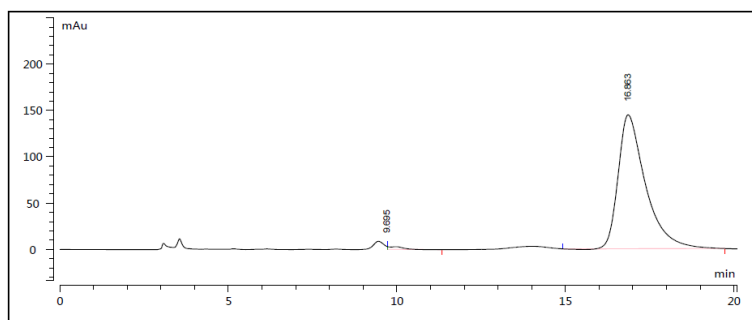

| No | Retention Time | Area     | % Area | Int Type |
|----|----------------|----------|--------|----------|
| 1  | 9.695          | 78.394   | 0.955  | BB       |
| 2  | 16.863         | 8134.695 | 99.045 | BB       |

**Ethyl-(2'S,3S,4'S,5'S)-5'-(difluoromethyl)-1-methyl-1'',2-dioxo-1''H-dispiro[indoline-3,3'-pyrrolidine-2',2''-naphtho[2,1-b]thiophene]-4'-carboxylate**

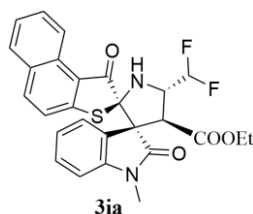

From 27.7 mg (0.1 mmol) of (Z)-2-((2,2-difluoroethyl)imino)benzo[*b*]thiophen-3(2H)-one **1i** and 27.7 mg (0.12 mmol, 1.2 equiv) of methyleneindolinone **2a**, 45.7 mg (90% yield) of compound **3ia** was obtained as a yellow solid,  $[\alpha]_D^{25} = -673$  ( $c = 1.0$ ,  $\text{CHCl}_3$ ), Mp. = 140-141 °C. Dr (> 20:1) was determined by HPLC analysis. 99% ee was determined by HPLC analysis

(Daicel Chiralpak IB column, 230 nm, hexane/2-propanol 87:13, 1.0 mL/min). Retention time:  $t_{\text{major}} = 16.9$  min,  $t_{\text{minor}} = 15.0$  min.  $^1\text{H}$  NMR (400 MHz,  $\text{CDCl}_3$ )  $\delta$  9.13 (d,  $J = 8.4$  Hz, 1H), 7.87 (d,  $J = 8.6$  Hz, 1H), 7.75 (d,  $J = 8.1$  Hz, 1H), 7.73 – 7.60 (m, 1H), 7.54 – 7.44 (m, 2H), 7.40 (td,  $J = 7.8, 1.0$  Hz, 1H), 7.15 (dd,  $J = 11.1, 4.1$  Hz, 1H), 7.06 (d,  $J = 8.6$  Hz, 1H), 6.93 – 6.56 (m, 2H), 4.58 (ddd,  $J = 11.9, 9.5, 6.4$  Hz, 1H), 4.40 (d,  $J = 8.1$  Hz, 1H), 3.85 – 3.65 (m, 2H), 3.04 (s, 3H), 2.74 (s, 1H), 0.75 (t,  $J = 7.1$  Hz, 3H).  $^{13}\text{C}\{^1\text{H}\}$  NMR (101 MHz,  $\text{CDCl}_3$ )  $\delta$  203.3, 171.6, 167.7, 152.7, 144.1, 137.4, 131.5, 130.8, 130.3, 129.9, 128.6, 128.5, 126.4, 124.3, 123.2, 123.1, 121.3, 121.1, 117.7 (dd,  $J_{\text{C-F}} = 331.0, 323.5$  Hz), 108.1, 86.7, 62.6, 61.0, 59.69 (dd,  $J_{\text{C-F}} = 38.2, 32.3$  Hz), 49.7, 49.6, 26.7, 13.6.  $^{19}\text{F}$  NMR (376 MHz,  $\text{CDCl}_3$ )  $\delta$  -119.2 (d,  $J = 296.3$  Hz, 1F), -123.0 (d,  $J = 296.3$  Hz, 1F). HRMS (ESI)  $m/z$  calcd for  $\text{C}_{27}\text{H}_{22}\text{F}_2\text{N}_2\text{NaO}_4\text{S}$   $[\text{M}+\text{Na}]^+$ : 531.1161, found 531.1162.

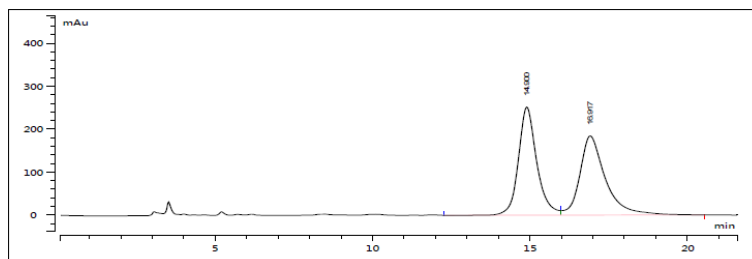

| No | Retention Time | Area      | % Area | Int Type |
|----|----------------|-----------|--------|----------|
| 1  | 14.900         | 10203.736 | 49.504 | BB       |
| 2  | 16.917         | 10408.120 | 50.496 | BB       |

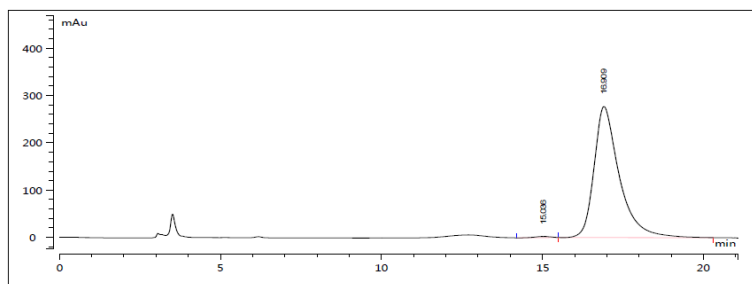

| No | Retention Time | Area      | % Area | Int Type |
|----|----------------|-----------|--------|----------|
| 1  | 15.036         | 77.263    | 0.509  | BB       |
| 2  | 16.909         | 15087.223 | 99.491 | BB       |

**Ethyl-(2*S*,3'*S*,4*S*,5'*S*)-5'-(difluoromethyl)-1'',5,7-trimethyl-2'',3-dioxo-3*H*-dispiro[benzo[*b*]thiophene-2,2'-pyrrolidine-3',3''-indoline]-4'-carboxylate**

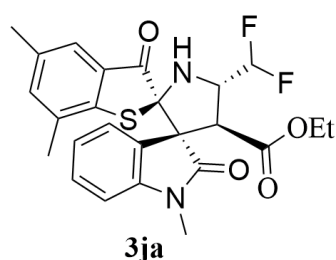

From 25.5 mg (0.1 mmol) of (*Z*)-2-((2,2-difluoroethyl)imino) benzo[*b*]thiophen-3(2*H*)-one **1j** and 27.7 mg (0.12 mmol, 1.2 equiv) of methyleneindolinone **2a**, 37.5 mg (78% yield) of compound **3ja** was obtained as a white solid,  $[\alpha]_D^{25} = -318$  ( $c = 1.0$ ,  $\text{CHCl}_3$ ), Mp. = 184-185 °C. Dr (> 20:1) was determined by HPLC analysis. 88% ee was determined by HPLC analysis (Daicel Chiralpak IB

column, 230 nm, hexane/2-propanol 80:20, 1.0 mL/min). Retention time:  $t_{\text{major}} = 9.4$  min,  $t_{\text{minor}} = 7.6$  min.  $^1\text{H}$  NMR (400 MHz,  $\text{CDCl}_3$ )  $\delta$  7.49 – 7.34 (m, 3H), 7.13 (dd,  $J = 13.6, 5.8$  Hz, 2H), 6.83 (d,  $J = 7.7$  Hz, 1H), 6.58 (ddd,  $J = 58.2, 56.8, 7.1$  Hz, 1H), 4.64 – 4.49 (m, 1H), 4.36 (d,  $J = 8.1$  Hz, 1H), 3.79 (dq,  $J = 10.8, 7.1$  Hz, 1H), 3.70 (dq,  $J = 10.8, 7.1$  Hz, 1H), 3.12 (s, 3H), 2.72 (s, 1H), 2.29 (s, 3H), 2.01 (s, 3H), 0.75 (t,  $J = 7.1$  Hz, 3H).  $^{13}\text{C}\{^1\text{H}\}$  NMR (101 MHz,  $\text{CDCl}_3$ )  $\delta$  202.8, 171.6, 167.7, 144.6, 144.1, 138.1, 135.7, 132.1, 129.9, 128.6, 128.4, 124.8, 124.2, 123.1, 117.4 (dd,  $J_{\text{C-F}} = 329.5, 324.7$  Hz), 108.0, 86.6, 62.4, 60.9, 59.7 (t,  $J_{\text{C-F}} = 38.2, 32.1$  Hz), 50.0, 50.0, 29.7, 26.7, 20.7, 18.4, 13.6.  $^{19}\text{F}$  NMR (376 MHz,  $\text{CDCl}_3$ )  $\delta$  -119.0 (d,  $J = 295.2$  Hz, 1F), -123.0 (d,  $J = 295.6$  Hz, 1F). HRMS (ESI)  $m/z$  calcd for  $\text{C}_{25}\text{H}_{24}\text{F}_2\text{N}_2\text{NaO}_4\text{S}$  [ $\text{M}+\text{Na}$ ] $^+$ : 509.1317, found 509.1317.

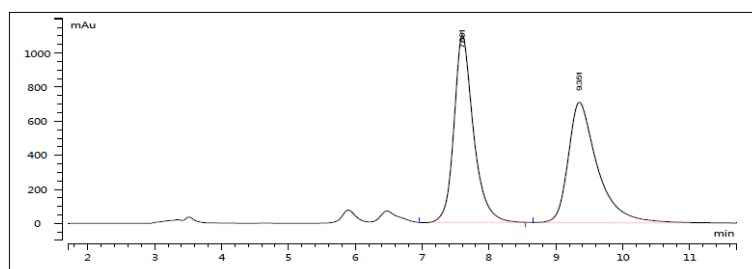

| No | Retention Time | Area      | % Area | Int Type |
|----|----------------|-----------|--------|----------|
| 1  | 7.601          | 22159.113 | 50.790 | BB       |
| 2  | 9.351          | 21469.988 | 49.210 | BB       |

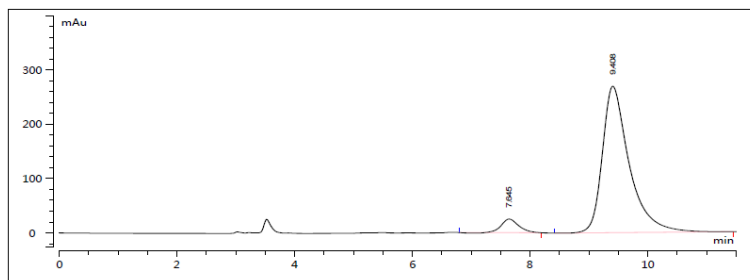

| No | Retention Time | Area     | % Area | Int Type |
|----|----------------|----------|--------|----------|
| 1  | 7.645          | 509.130  | 5.617  | BB       |
| 2  | 9.408          | 8555.285 | 94.383 | BB       |

**Ethyl-(2*S*,3'*S*,4*S*,5'*S*)-5'-(difluoromethyl)-1'',4,7-trimethyl-2'',3-dioxo-3H-dispiro[benzo[*b*]thiophene-2,2'-pyrrolidine-3',3''-indoline]-4'-carboxylate**

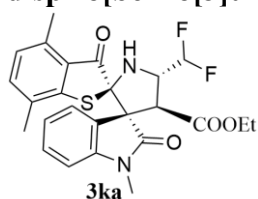

From 25.5 mg (0.1 mmol) of (*Z*)-2-((2,2-difluoroethyl)imino)benzo[*b*]thiophen-3(2*H*)-one **1k** and 27.7 mg (0.12 mmol, 1.2 equiv) of methyleneindolinone **2a**, 45.0 mg (88% yield) of compound **3ka** was obtained as a white solid,  $[\alpha]_D^{25} = -408$  ( $c = 1.0$ ,  $\text{CHCl}_3$ ), Mp. = 218-219 °C. Dr (> 20:1) was determined by HPLC analysis. 98% ee was determined by HPLC analysis (Daicel Chiralpak IB column, 230 nm, hexane/2-propanol 80:20, 1.0 mL/min). Retention time:  $t_{\text{major}} = 7.9$  min,  $t_{\text{minor}} = 5.9$  min.  $^1\text{H NMR}$  (400 MHz,  $\text{CDCl}_3$ )  $\delta$  7.39 (ddd,  $J = 11.9, 8.8, 4.2$  Hz, 2H), 7.18 – 7.06 (m, 2H), 6.88 – 6.47 (m, 3H), 4.62 – 4.48 (m, 1H), 4.30 (d,  $J = 8.2$  Hz, 1H), 3.82 – 3.64 (m, 2H), 3.08 (s, 3H), 2.70 (s, 1H), 2.61 (s, 3H), 1.98 (s, 3H), 0.74 (t,  $J = 7.1$  Hz, 3H).  $^{13}\text{C}\{^1\text{H}\}$  NMR (101 MHz,  $\text{CDCl}_3$ )  $\delta$  203.8, 171.8, 167.7, 147.6, 144.1, 139.4, 135.5, 129.8, 129.5, 128.3, 127.8, 126.0, 124.3, 123.1, 117.6 (dd,  $J_{\text{C-F}} = 330.7, 323.5$  Hz), 108.0, 85.5, 62.7, 60.9, 59.57 (dd,  $J_{\text{C-F}} = 38.1, 32.3$  Hz), 49.9, 49.8, 26.7, 18.8, 18.1, 13.6.  $^{19}\text{F NMR}$  (376 MHz,  $\text{CDCl}_3$ )  $\delta$  -119.3 (d,  $J = 295.9$  Hz, 1F), -123.0 (d,  $J = 295.6$  Hz, 1F). HRMS (ESI)  $m/z$  calcd for  $\text{C}_{25}\text{H}_{24}\text{F}_2\text{N}_2\text{NaO}_4\text{S}$   $[\text{M}+\text{Na}]^+$ : 509.1317, found 509.1317.

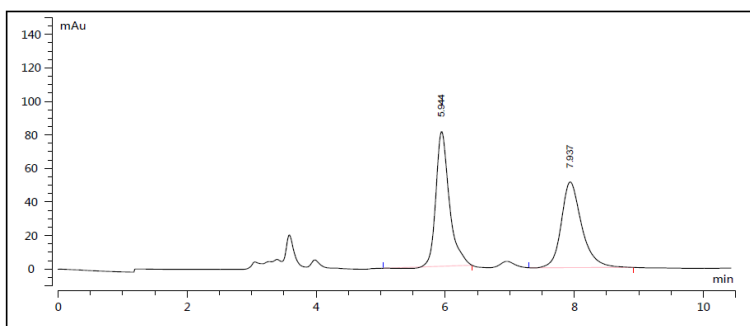

| No | Retention Time | Area     | % Area | Int Type |
|----|----------------|----------|--------|----------|
| 1  | 5.944          | 1155.980 | 50.669 | BB       |
| 2  | 7.937          | 1125.464 | 49.331 | BB       |

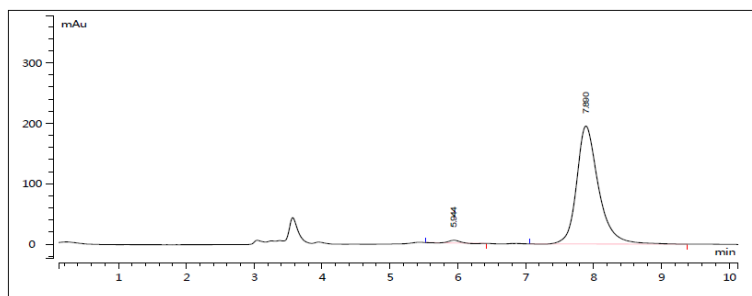

| No | Retention Time | Area     | % Area | Int Type |
|----|----------------|----------|--------|----------|
| 1  | 5.944          | 39.973   | 0.909  | BB       |
| 2  | 7.890          | 4359.383 | 99.091 | BB       |

**(2*S*,3'*S*,4'*S*,5'*S*)-4'-benzoyl-5'-(difluoromethyl)-1''-methyl-3*H*-dispiro [benzo [*b*]thiophene-2,2'-pyrrolidine-3',3''-indoline]-2'',3-dione**

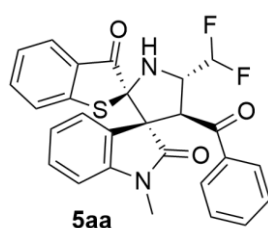

From 22.7 mg (0.1 mmol) of (*Z*)-2-((2,2-difluoroethyl)imino) benzo[*b*]thiophen-3(2*H*)-one **1a** and 31.6 mg (0.12 mmol, 1.2 equiv) of methyleneindolinone **4a**, 43.6 mg (89% yield) of compound **5aa** was obtained as a white solid,  $[\alpha]_D^{24} = -36$  ( $c = 1.0$ ,  $\text{CHCl}_3$ ), Mp. = 98-99 °C. Dr (> 20:1) was determined by HPLC analysis. 95% ee was determined by HPLC analysis (Daicel Chiralpak IA column, 230 nm, hexane/2-propanol 91:9, 1.0 mL/min). Retention time:  $t_{\text{major}} = 25.7$  min,  $t_{\text{minor}} = 23.7$  min.  $^1\text{H}$  NMR (400 MHz,  $\text{CDCl}_3$ )  $\delta$  7.79 (dd,  $J = 7.7, 0.7$  Hz, 1H), 7.46 – 7.39 (m, 3H), 7.39 – 7.34 (m, 2H), 7.31 (td,  $J = 7.8, 1.2$  Hz, 1H), 7.27 – 7.22 (m, 2H), 7.21 – 7.11 (m, 2H), 6.99 (d,  $J = 7.9$  Hz, 1H), 6.68 (ddd,  $J = 58.6, 56.7, 7.2$  Hz, 1H), 6.49 (d,  $J = 7.7$  Hz, 1H), 5.15 (d,  $J = 7.7$  Hz, 1H), 4.95 (dd,  $J = 12.4, 6.8$  Hz, 1H), 2.84 (s, 1H), 2.46 (s, 3H).  $^{13}\text{C}\{^1\text{H}\}$  NMR (101 MHz,  $\text{CDCl}_3$ )  $\delta$  202.8, 194.5, 171.4, 147.7, 143.1, 136.5, 136.4, 133.0, 129.8, 129.1, 128.1, 128.1, 127.4, 127.2, 125.6, 125.3, 123.4, 123.3, 117.7 (dd,  $J_{\text{C-F}} = 329.1, 324.7$  Hz), 108.1, 87.0, 63.8, 59.43 (dd,  $J_{\text{C-F}} = 38.9, 32.5$  Hz), 52.7, 52.7, 26.0.  $^{19}\text{F}$  NMR (376 MHz,  $\text{CDCl}_3$ )  $\delta$  -118.9 (d,  $J = 295.6$  Hz, 1F), -123.4 (d,  $J = 295.9$  Hz, 1F). HRMS (ESI)  $m/z$  calcd for  $\text{C}_{27}\text{H}_{20}\text{F}_2\text{N}_2\text{NaO}_3\text{S}$   $[\text{M}+\text{Na}]^+$ : 513.1055, found 513.1055.

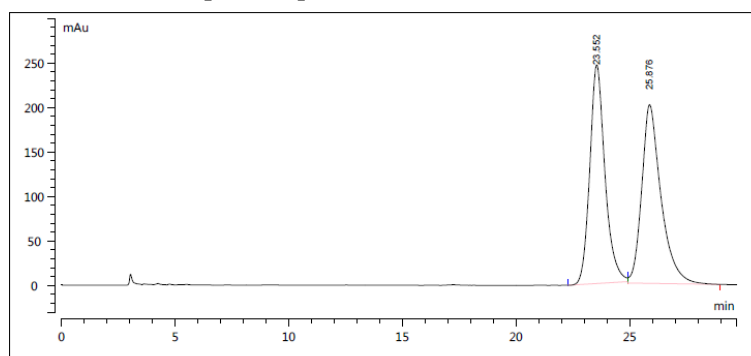

| No | Retention Time | Area      | % Area | Int Type |
|----|----------------|-----------|--------|----------|
| 1  | 23.552         | 11407.605 | 49.083 | BB       |
| 2  | 25.876         | 11834.052 | 50.917 | BB       |

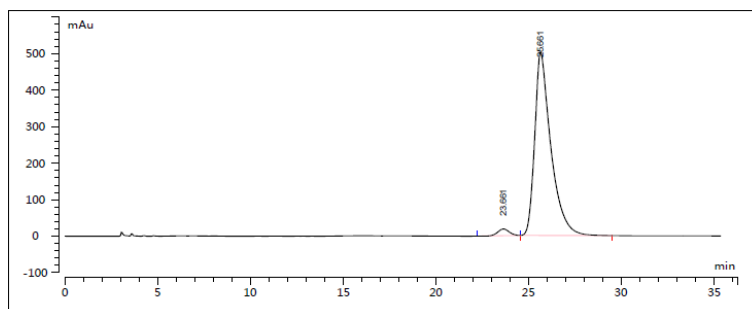

| No | Retention Time | Area      | % Area | Int Type |
|----|----------------|-----------|--------|----------|
| 1  | 23.661         | 776.830   | 2.496  | BB       |
| 2  | 25.661         | 30350.267 | 97.504 | BB       |

**(2*S*,3'*S*,4'*S*,5'*S*)-5'-(difluoromethyl)-4'-(4-fluorobenzoyl)-1''-methyl-3*H*-dispiro[benzo[*b*]thiophene-2,2'-pyrrolidine-3',3''-indoline]-2'',3-dione**

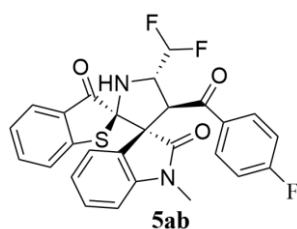

From 22.7 mg (0.1 mmol) of (*Z*)-2-((2,2-difluoroethyl)imino)benzo[*b*]thiophen-3(2*H*)-one **1a** and 33.7 mg (0.12 mmol, 1.2 equiv) of methyleneindolinone **4b**, 43.5 mg (86% yield) of compound **5ab** was obtained as a white solid,  $[\alpha]_D^{25} = -227$  ( $c = 1.0$ ,  $\text{CHCl}_3$ ), Mp. = 88-89 °C. Dr ( $> 20:1$ ) was determined by HPLC analysis. 82% ee was determined by HPLC analysis

(Daicel Chiralpak IA column, 230 nm, hexane/2-propanol 80:20, 1.0 mL/min). Retention time:  $t_{\text{major}} = 15.0$  min,  $t_{\text{minor}} = 13.4$  min.  $^1\text{H}$  NMR (400 MHz,  $\text{CDCl}_3$ )  $\delta$  7.79 (d,  $J = 7.3$  Hz, 1H), 7.53 – 7.39 (m, 4H), 7.32 (td,  $J = 7.8, 1.0$  Hz, 1H), 7.24 – 7.13 (m, 2H), 7.05 – 6.89 (m, 3H), 6.87 – 6.44 (m, 2H), 5.14 (d,  $J = 7.8$  Hz, 1H), 4.94 (td,  $J = 12.1, 7.3$  Hz, 1H), 2.85 (s, 1H), 2.57 (s, 3H).  $^{13}\text{C}$   $\{^1\text{H}\}$  NMR (101 MHz,  $\text{CDCl}_3$ )  $\delta$  202.6, 192.7, 171.4, 166.9, 164.4, 147.7, 143.0, 136.4, 132.7, 132.7, 131.0, 131.0, 129.9, 129.0, 127.3, 127.2, 125.7, 125.4, 123.5, 123.3, 117.6 (dd,  $J_{\text{C-F}} = 329.9, 243.5$  Hz), 115.2, 115.1, 108.1, 87.1, 63.8, 59.6 (dd,  $J_{\text{C-F}} = 38.9, 32.6$  Hz), 52.4, 52.3, 26.1.  $^{19}\text{F}$  NMR (376 MHz,  $\text{CDCl}_3$ )  $\delta$  -104.5, -118.9 (d,  $J = 295.9$  Hz, 1F), -123.4 (d,  $J = 296.3$  Hz, 1F). HRMS (ESI)  $m/z$  calcd for  $\text{C}_{27}\text{H}_{19}\text{F}_3\text{N}_2\text{NaO}_3\text{S}$   $[\text{M}+\text{Na}]^+$ : 531.0961, found 531.0961.

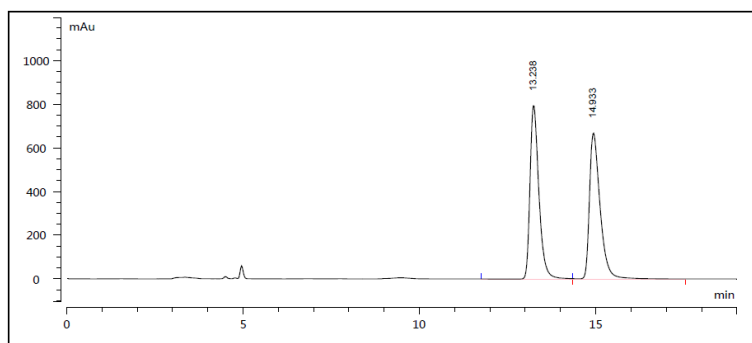

| No | Retention Time | Area      | % Area | Int Type |
|----|----------------|-----------|--------|----------|
| 1  | 13.238         | 13860.165 | 49.754 | BB       |
| 2  | 14.933         | 13996.972 | 50.246 | BB       |

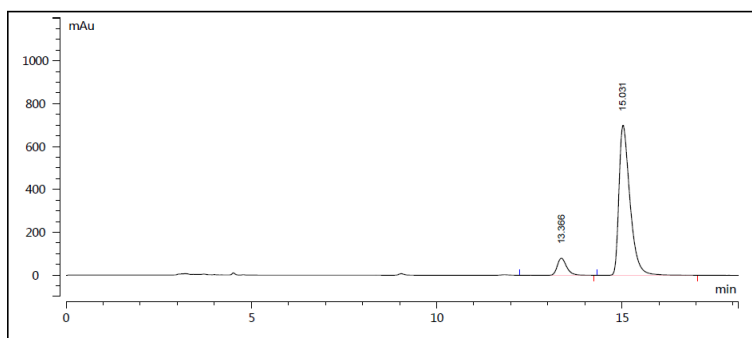

| No | Retention Time | Area      | % Area | Int Type |
|----|----------------|-----------|--------|----------|
| 1  | 13.366         | 1387.920  | 8.778  | BB       |
| 2  | 15.031         | 14424.224 | 91.222 | BB       |

**(2*S*,3'*S*,4'*S*,5'*S*)-4'-(4-bromobenzoyl)-5'-(difluoromethyl)-1''-methyl-3*H*-dispiro[benzo[*b*]thiophene-2,2'-pyrrolidine-3',3''-indoline]-2'',3-dione**

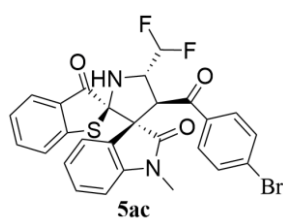

From 22.7 mg (0.1 mmol) of (*Z*)-2-((2,2-difluoroethyl)imino)benzo[*b*]thiophen-3(2*H*)-one **1a** and 40.9 mg (0.12 mmol, 1.2 equiv) of methyleneindolinone **4c**, 48.2 mg (85% yield) of compound **5ac** was obtained as a yellow solid,  $[\alpha]_D^{25} = -347$  ( $c = 1.0$ ,  $\text{CHCl}_3$ ), Mp. = 56-57 °C. Dr (> 20:1) was determined by HPLC analysis. 73% ee was determined by HPLC analysis

(Daicel Chiralpak IA column, 230 nm, hexane/2-propanol 80:20, 1.0 mL/min). Retention time:  $t_{\text{major}} = 15.1$  min,  $t_{\text{minor}} = 12.8$  min.  $^1\text{H}$  NMR (400 MHz,  $\text{CDCl}_3$ )  $\delta$  7.81 – 7.76 (m, 1H), 7.50 – 7.37 (m, 4H), 7.32 (td,  $J = 7.8$ , 1.0 Hz, 1H), 7.26 (t,  $J = 4.3$  Hz, 2H), 7.18 (dt,  $J = 14.9$ , 7.5 Hz, 2H), 7.00 (d,  $J = 7.9$  Hz, 1H), 6.83 – 6.49 (m, 2H), 5.11 (d,  $J = 7.7$  Hz, 1H), 4.92 (dd,  $J = 12.0$ , 4.7 Hz, 1H), 2.84 (s, 1H), 2.56 (s, 3H).  $^{13}\text{C}\{^1\text{H}\}$  NMR (101 MHz,  $\text{CDCl}_3$ )  $\delta$  202.6, 193.5, 171.3, 147.7, 143.0, 136.5, 135.1, 131.4, 129.9, 129.7, 129.0, 128.3, 127.2, 125.7, 125.4, 123.5, 123.3, 117.6 (dd,  $J_{\text{C-F}} = 329.9$ , 242.4 Hz), 108.2, 87.0, 63.7, 59.6 (dd,  $J_{\text{C-F}} = 38.1$ , 32.5 Hz), 52.6, 52.5, 29.7, 26.1.  $^{19}\text{F}$  NMR (376 MHz,  $\text{CDCl}_3$ )  $\delta$  -119.0 (d,  $J = 296.3$  Hz, 1F), -123.4 (d,  $J = 295.9$  Hz, 1F). HRMS (ESI)  $m/z$  calcd for  $\text{C}_{27}\text{H}_{19}\text{BrF}_2\text{N}_2\text{NaO}_3\text{S}$   $[\text{M}+\text{Na}]^+$ : 591.0160, found 591.0160.

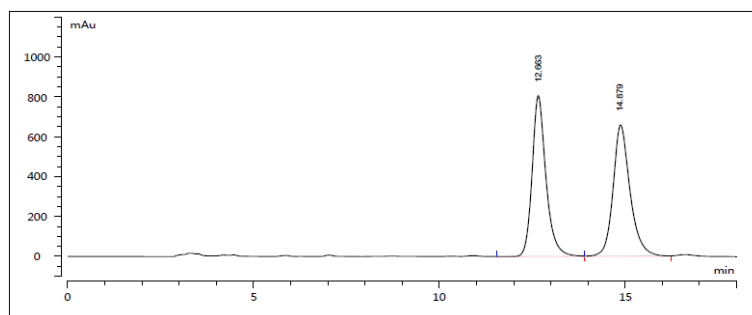

| No | Retention Time | Area      | % Area | Int Type |
|----|----------------|-----------|--------|----------|
| 1  | 12.663         | 20825.106 | 49.984 | BB       |
| 2  | 14.879         | 20838.087 | 50.016 | BB       |

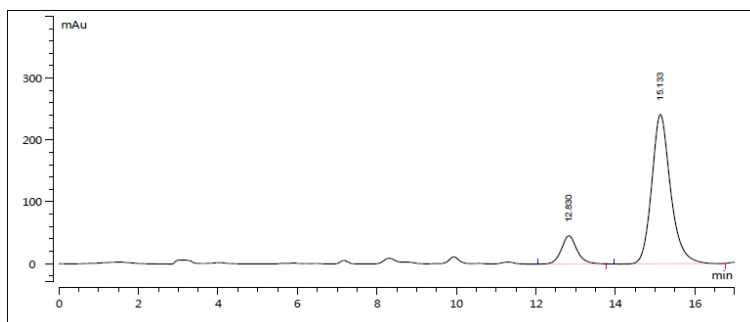

| No | Retention Time | Area     | % Area | Int Type |
|----|----------------|----------|--------|----------|
| 1  | 12.830         | 1245.913 | 13.556 | BB       |
| 2  | 15.133         | 7944.936 | 86.444 | BB       |

**(2*S*,3*S*,4'*S*,5'*S*)-5'-(difluoromethyl)-1''-methyl-4'-(4-methylbenzoyl)-3H-dispiro[benzo[*b*]thiophene-2,2'-pyrrolidine-3',3''-indoline]-2'',3-dione**

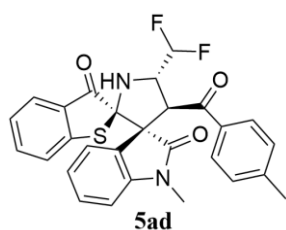

From 22.7 mg (0.1 mmol) of (*Z*)-2-((2,2-difluoroethyl)imino) benzo[*b*]thiophen-3(2*H*)-one **1a** and 33.2 mg (0.12 mmol, 1.2 equiv) of methyleneindolinone **4d**, 43.5 mg (86% yield) of compound **5ad** was obtained as a white solid,  $[\alpha]_D^{25} = -365$  ( $c = 1.0$ ,  $\text{CHCl}_3$ ), Mp. = 148-149 °C. Dr (> 20:1) was determined by HPLC analysis. 88% ee was determined by HPLC analysis (Daicel Chiralpak IA column, 230 nm, hexane/2-propanol 80:20, 1.0 mL/min). Retention time:  $t_{\text{major}} = 15.4$  min,  $t_{\text{minor}} = 12.2$  min.  $^1\text{H NMR}$  (400 MHz,  $\text{CDCl}_3$ )  $\delta$  7.79 (d,  $J = 7.3$  Hz, 1H), 7.43 (dd,  $J = 10.6, 4.4$  Hz, 2H), 7.30 (td,  $J = 8.6, 1.4$  Hz, 3H), 7.22 – 7.11 (m, 2H), 7.05 (d,  $J = 8.0$  Hz, 2H), 6.99 (d,  $J = 7.9$  Hz, 1H), 6.87 – 6.40 (m, 1H), 5.13 (d,  $J = 7.7$  Hz, 1H), 4.94 (d,  $J = 5.4$  Hz, 1H), 2.84 (s, 1H), 2.50 (s, 3H), 2.31 (s, 3H).  $^{13}\text{C}\{^1\text{H}\}$  NMR (101 MHz,  $\text{CDCl}_3$ )  $\delta$  202.8, 193.8, 171.5, 147.7, 143.9, 143.1, 136.3, 133.9, 129.7, 129.1, 128.7, 128.4, 127.5, 127.2, 125.6, 125.4, 123.3, 123.3, 117.7 (dd,  $J_{\text{C-F}} = 329.9, 323.7$  Hz), 108.0, 87.1, 64.0, 59.60 (dd,  $J_{\text{C-F}} = 38.9, 32.2$  Hz), 52.5, 52.4, 26.0, 21.5.  $^{19}\text{F NMR}$  (376 MHz,  $\text{CDCl}_3$ )  $\delta$  -118.9 (d,  $J = 158.5$  Hz, 1F), -123.4 (d,  $J = 164.5$  Hz, 1F). HRMS (ESI)  $m/z$  calcd for  $\text{C}_{28}\text{H}_{22}\text{F}_2\text{N}_2\text{NaO}_3\text{S}$   $[\text{M}+\text{Na}]^+$ : 527.1211, found 527.1211.

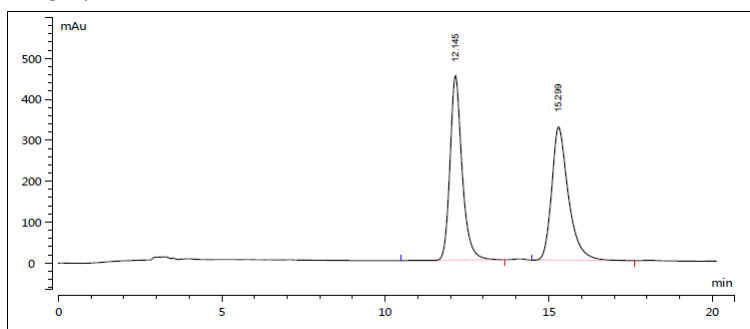

| No | Retention Time | Area      | % Area | Int Type |
|----|----------------|-----------|--------|----------|
| 1  | 12.145         | 11605.150 | 50.026 | BB       |
| 2  | 15.299         | 11593.218 | 49.974 | BB       |



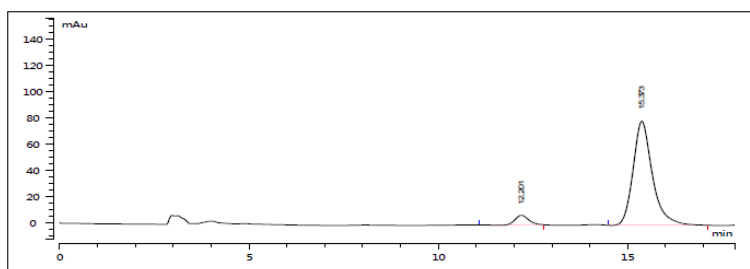

| No | Retention Time | Area     | % Area | Int Type |
|----|----------------|----------|--------|----------|
| 1  | 12.201         | 171.850  | 5.781  | BB       |
| 2  | 15.373         | 2800.862 | 94.219 | BB       |

**(2*S*,3'*S*,4'*S*,5'*S*)-5'-(difluoromethyl)-4'-(4-methoxybenzoyl)-1''-methyl-3*H*-dispiro[benzo[*b*]thiophene-2,2'-pyrrolidine-3',3''-indoline]-2'',3-dione**

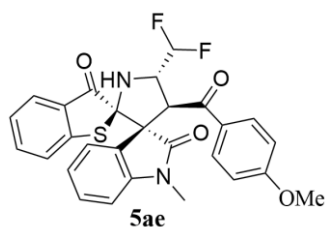

From 22.7 mg (0.1 mmol) of (*Z*)-2-((2,2-difluoroethyl)imino)benzo[*b*]thiophen-3(2*H*)-one **1a** and 35.2 mg (0.12 mmol, 1.2 equiv) of methyleneindolinone **4e**, 42.0 mg (81% yield) of compound **5ae** was obtained as a white solid,  $[\alpha]_D^{25} = -183$  ( $c = 1.0$ ,  $\text{CHCl}_3$ ), Mp. = 75–76 °C. Dr (> 20:1) was determined by HPLC analysis. 90%

ee was determined by HPLC analysis (Daicel Chiralpak IA column, 230 nm, hexane/2-propanol 50:50, 1.0 mL/min). Retention time:  $t_{\text{major}} = 8.2$  min,  $t_{\text{minor}} = 7.2$  min.  $^1\text{H}$  NMR (400 MHz,  $\text{CDCl}_3$ )  $\delta$  7.79 (d,  $J = 7.7$  Hz, 1H), 7.53 – 7.39 (m, 4H), 7.35 – 7.23 (m, 1H), 7.17 (dt,  $J = 12.4, 7.5$  Hz, 2H), 6.99 (d,  $J = 7.9$  Hz, 1H), 6.82 – 6.42 (m, 4H), 5.14 (d,  $J = 7.8$  Hz, 1H), 4.95 (td,  $J = 12.1, 7.2$  Hz, 1H), 3.79 (s, 3H), 2.86 (s, 1H), 2.58 (s, 3H).  $^{13}\text{C}\{^1\text{H}\}$  NMR (101 MHz,  $\text{CDCl}_3$ )  $\delta$  202.7, 192.3, 171.6, 163.6, 147.7, 143.0, 136.3, 130.7, 129.7, 129.2, 129.1, 127.5, 127.1, 125.6, 125.5, 123.3, 123.3, 117.8 (dd,  $J_{\text{C-F}} = 330.6, 323.9$  Hz), 113.3, 108.0, 87.2, 64.2, 59.78 (dd,  $J_{\text{C-F}} = 38.8, 32.2$  Hz), 55.5, 51.9, 51.9, 26.1.  $^{19}\text{F}$  NMR (376 MHz,  $\text{CDCl}_3$ )  $\delta$  -119.0 (d,  $J = 295.6$  Hz, 1F), -123.4 (d,  $J = 295.2$  Hz, 1F). HRMS (ESI)  $m/z$  calcd for  $\text{C}_{28}\text{H}_{22}\text{F}_2\text{N}_2\text{NaO}_4\text{S}$   $[\text{M}+\text{Na}]^+$ : 543.1161, found 543.1161.

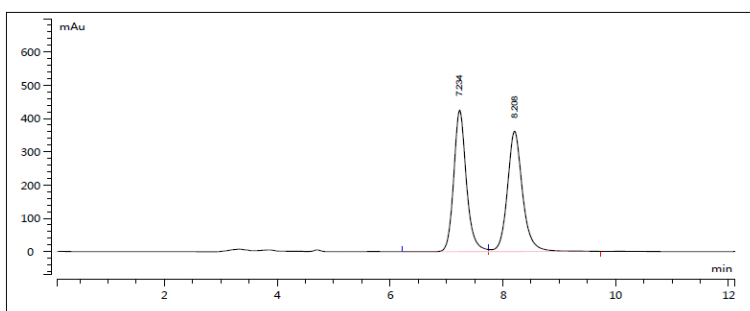

| No | Retention Time | Area     | % Area | Int Type |
|----|----------------|----------|--------|----------|
| 1  | 7.234          | 6621.987 | 49.434 | BB       |
| 2  | 8.208          | 6773.551 | 50.566 | BB       |

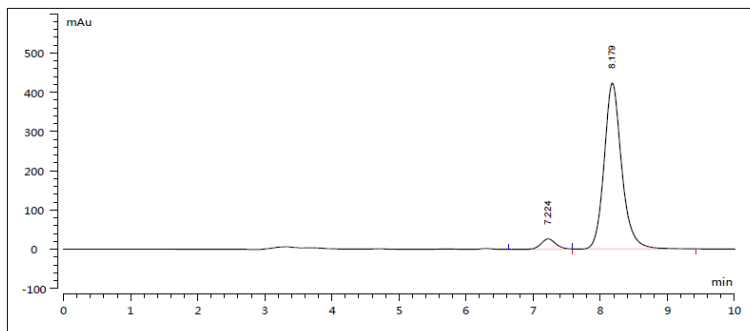

| No | Retention Time | Area     | % Area | Int Type |
|----|----------------|----------|--------|----------|
| 1  | 7.224          | 400.057  | 4.937  | BB       |
| 2  | 8.179          | 7702.609 | 95.063 | BB       |

**(2*S*,3'*S*,4'*S*,5'*S*)-5'-(difluoromethyl)-1''-methyl-4'-(3-methylbenzoyl)-3*H*-dispiro[benzo[*b*]thiophene-2,2'-pyrrolidine-3',3''-indoline]-2'',3-dione**

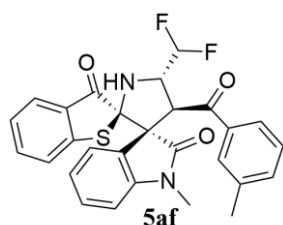

From 22.7 mg (0.1 mmol) of (*Z*)-2-((2,2-difluoroethyl)imino) benzo[*b*]thiophen-3(2*H*)-one **1a** and 33.2 mg (0.12 mmol, 1.2 equiv) of methyleneindolinone **4f**, 43.0 mg (85% yield) of compound **5af** was obtained as a white solid,  $[\alpha]_D^{25} = -326$  ( $c = 1.0$ ,  $\text{CHCl}_3$ ), Mp. = 79-80 °C. Dr ( $> 20:1$ ) was determined by HPLC analysis. 87% ee was determined by HPLC analysis

(Daicel Chiralpak IA column, 230 nm, hexane/2-propanol 50:50, 1.0 mL/min). Retention time:  $t_{\text{major}} = 7.2$  min,  $t_{\text{minor}} = 6.6$  min.  $^1\text{H NMR}$  (400 MHz,  $\text{CDCl}_3$ )  $\delta$  7.82 – 7.73 (m, 1H), 7.53 – 7.35 (m, 2H), 7.30 (td,  $J = 7.8, 1.1$  Hz, 1H), 7.25 – 7.06 (m, 6H), 6.99 (d,  $J = 7.9$  Hz, 1H), 6.69 (ddd,  $J = 58.6, 56.8, 7.2$  Hz, 1H), 6.48 (d,  $J = 7.8$  Hz, 1H), 5.10 (d,  $J = 7.6$  Hz, 1H), 4.95 (td,  $J = 12.2, 7.2$  Hz, 1H), 2.82 (s, 1H), 2.48 (s, 3H), 2.27 (s, 3H).  $^{13}\text{C}\{^1\text{H}\}$  NMR (101 MHz,  $\text{CDCl}_3$ )  $\delta$  202.7, 194.7, 171.5, 147.7, 143.2, 137.9, 136.5, 136.3, 133.7, 129.7, 129.1, 128.6, 128.0, 127.5, 127.2, 125.6, 125.3, 125.3, 123.3, 123.3, 117.7 (dd,  $J_{\text{C-F}} = 329.0, 324.4$  Hz), 107.9, 87.1, 63.8, 59.4 (dd,  $J_{\text{C-F}} = 38.8, 32.3$  Hz), 53.0, 52.9, 25.9, 21.1.  $^{19}\text{F NMR}$  (376 MHz,  $\text{CDCl}_3$ )  $\delta$  -118.9 (d,  $J = 295.6$  Hz, 1F), -123.5 (d,  $J = 295.9$  Hz, 1F). HRMS (ESI)  $m/z$  calcd for  $\text{C}_{28}\text{H}_{22}\text{F}_2\text{N}_2\text{NaO}_3\text{S}$   $[\text{M}+\text{Na}]^+$ : 527.1211, found 527.1211.

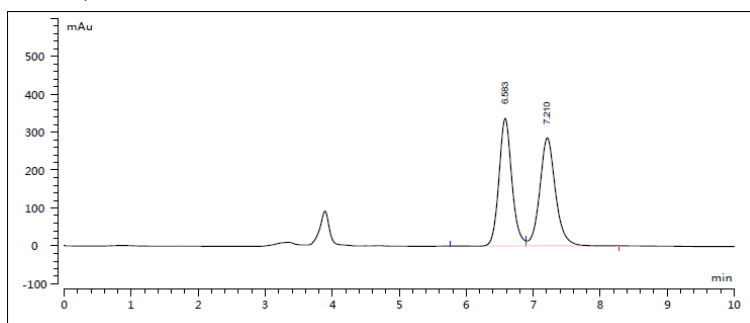

| No | Retention Time | Area     | % Area | Int Type |
|----|----------------|----------|--------|----------|
| 1  | 6.583          | 4489.656 | 49.245 | BB       |

|   |       |          |        |    |
|---|-------|----------|--------|----|
| 2 | 7.210 | 4627.348 | 50.755 | BB |
|---|-------|----------|--------|----|

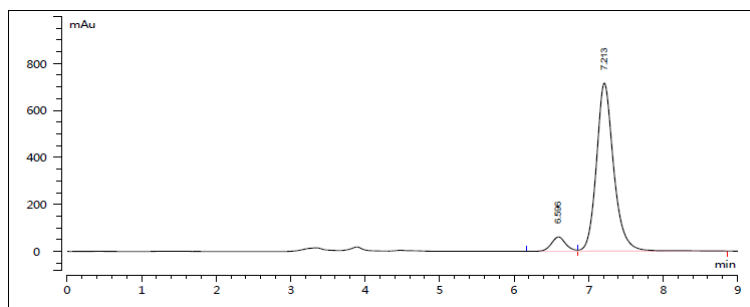

| No | Retention Time | Area      | % Area | Int Type |
|----|----------------|-----------|--------|----------|
| 1  | 6.596          | 808.492   | 6.554  | BB       |
| 2  | 7.213          | 11527.329 | 93.446 | BB       |

**(2*S*,3'*S*,4'*S*,5'*S*)-4'-(3-chlorobenzoyl)-5'-(difluoromethyl)-1''-methyl-3*H*-dispiro[benzo[*b*]thiophene-2,2'-pyrrolidine-3',3''-indoline]-2'',3-dione**

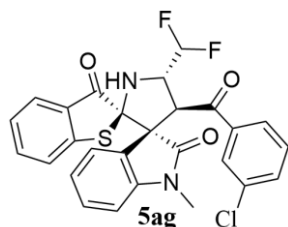

From 22.7 mg (0.1 mmol) of (*Z*)-2-((2,2-difluoroethyl)imino)benzo[*b*]thiophen-3(2*H*)-one **1a** and 35.6 mg (0.12 mmol, 1.2 equiv) of methyleneindolinone **4g**, 45.6 mg (87% yield) of compound **5ag** was obtained as a white solid,  $[\alpha]_D^{25} = -340$  ( $c = 1.0$ ,  $\text{CHCl}_3$ ), Mp. = 65-66 °C. Dr (> 20:1) was determined by HPLC analysis. 93% ee was determined by HPLC analysis

(Daicel Chiralpak IA column, 230 nm, hexane/2-propanol 70:30, 1.0 mL/min). Retention time:  $t_{\text{major}} = 11.2$  min,  $t_{\text{minor}} = 9.9$  min.  $^1\text{H}$  NMR (400 MHz,  $\text{CDCl}_3$ )  $\delta$  7.84 – 7.73 (m, 1H), 7.49 – 7.28 (m, 5H), 7.26 – 7.21 (m, 2H), 7.21 – 7.12 (m, 3H), 6.99 (d,  $J = 7.9$  Hz, 1H), 6.85 – 6.50 (m, 2H), 5.08 (d,  $J = 7.7$  Hz, 1H), 4.93 (td,  $J = 12.0, 7.1$  Hz, 1H), 2.84 (s, 1H), 2.55 (s, 3H).  $^{13}\text{C}\{^1\text{H}\}$  NMR (101 MHz,  $\text{CDCl}_3$ )  $\delta$  202.6, 193.4, 171.4, 147.6, 143.1, 138.0, 136.4, 134.5, 132.9, 130.0, 129.4, 129.0, 129.0, 128.2, 128.0, 127.2, 127.2, 126.3, 125.7, 125.3, 123.5, 123.3, 117.6 (dd,  $J_{\text{C-F}} = 329.9, 323.2$  Hz), 108.1, 87.0, 63.6, 59.47 (dd,  $J_{\text{C-F}} = 38.9, 32.6$  Hz), 53.0, 52.9, 29.7, 26.1.  $^{19}\text{F}$  NMR (376 MHz,  $\text{CDCl}_3$ )  $\delta$  -119.0 (d,  $J = 296.3$  Hz, 1F), -123.4 (d,  $J = 296.3$  Hz, 1F). HRMS (ESI)  $m/z$  calcd for  $\text{C}_{27}\text{H}_{19}\text{ClF}_2\text{N}_2\text{NaO}_3\text{S}$   $[\text{M}+\text{Na}]^+$ : 547.0665, found 547.0665.

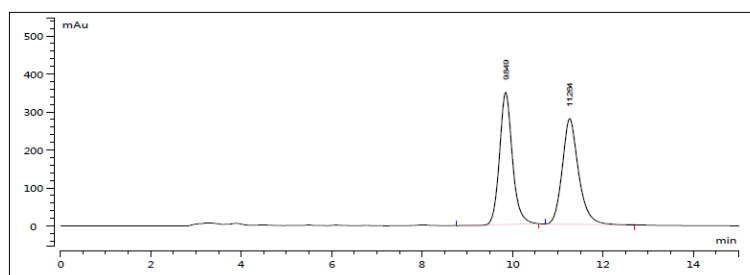

| No | Retention Time | Area     | % Area | Int Type |
|----|----------------|----------|--------|----------|
| 1  | 9.849          | 6860.491 | 49.593 | BB       |
| 2  | 11.264         | 6973.031 | 50.407 | BB       |

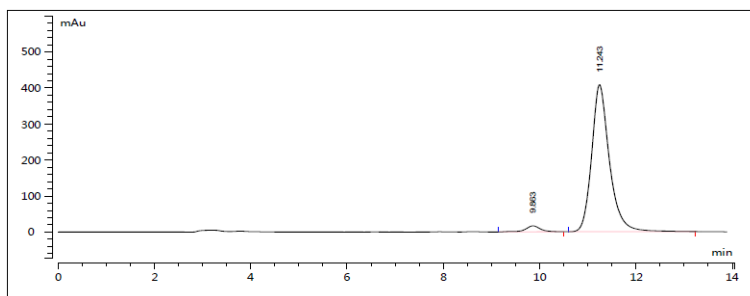

| No | Retention Time | Area      | % Area | Int Type |
|----|----------------|-----------|--------|----------|
| 1  | 9.863          | 359.821   | 3.324  | BB       |
| 2  | 11.243         | 10463.568 | 96.676 | BB       |

**(2*S*,3'*S*,4'*S*,5'*S*)-4'-(2-naphthoyl)-5'-(difluoromethyl)-1'-methyl-3*H*-dispiro[benzo[*b*]thiophene-2,2'-pyrrolidine-3',3''-indoline]-2'',3-dione**

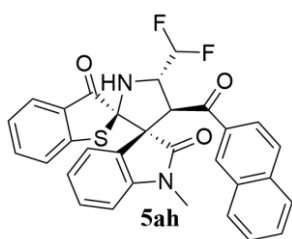

From 22.7 mg (0.1 mmol) of (*Z*)-2-((2,2-difluoroethyl)imino)benzo[*b*]thiophen-3(2*H*)-one **1a** and 37.6 mg (0.12 mmol, 1.2 equiv) of methyleneindolinone **4h**, 48.0 mg (89% yield) of compound **5ah** was obtained as a white solid,  $[\alpha]_D^{25} = -246$  ( $c = 1.0$ ,  $\text{CHCl}_3$ ), Mp. = 116-117 °C. Dr (> 20:1) was determined by HPLC analysis. 95% ee was determined by HPLC analysis (Daicel Chiralpak IA column, 230 nm, hexane/2-propanol 80:20, 1.0 mL/min). Retention time:  $t_{\text{major}} = 15.0$  min,  $t_{\text{minor}} = 12.9$  min.  $^1\text{H}$  NMR (400 MHz,  $\text{CDCl}_3$ )  $\delta$  8.06 (s, 1H), 7.92 (d,  $J = 8.0$  Hz, 1H), 7.81 (d,  $J = 7.2$  Hz, 1H), 7.75 (d,  $J = 8.0$  Hz, 1H), 7.61 (d,  $J = 8.6$  Hz, 1H), 7.58 – 7.52 (m, 1H), 7.49 (dd,  $J = 11.5, 4.5$  Hz, 1H), 7.46 – 7.35 (m, 2H), 7.27 (dt,  $J = 7.6, 3.1$  Hz, 2H), 7.21 – 7.12 (m, 2H), 6.97 (d,  $J = 7.9$  Hz, 1H), 6.75 (ddd,  $J = 58.5, 56.9, 7.2$  Hz, 1H), 6.35 (d,  $J = 7.7$  Hz, 1H), 5.28 (d,  $J = 7.7$  Hz, 1H), 5.04 (d,  $J = 5.5$  Hz, 1H), 2.87 (s, 1H), 2.11 (s, 3H).  $^{13}\text{C}\{^1\text{H}\}$  NMR (101 MHz,  $\text{CDCl}_3$ )  $\delta$  202.8, 194.3, 171.7, 147.7, 143.0, 136.4, 135.3, 133.5, 131.9, 130.0, 129.8, 129.7, 129.1, 128.7, 127.9, 127.5, 127.5, 127.2, 126.8, 125.6, 125.3, 123.8, 123.4, 123.3, 117.7 (dd,  $J_{\text{C-F}} = 329.9, 323.7$  Hz), 108.1, 87.2, 63.8, 59.56 (dd,  $J_{\text{C-F}} = 39.1, 32.5$  Hz), 53.1, 53.0, 25.8.  $^{19}\text{F}$  NMR (376 MHz,  $\text{CDCl}_3$ )  $\delta$  -119.0 (d,  $J = 295.6$  Hz, 1F), -123.4 (d,  $J = 295.6$  Hz, 1F). HRMS (ESI)  $m/z$  calcd for  $\text{C}_{31}\text{H}_{22}\text{F}_2\text{N}_2\text{NaO}_3\text{S}$   $[\text{M}+\text{Na}]^+$ : 563.1211, found 563.1211.

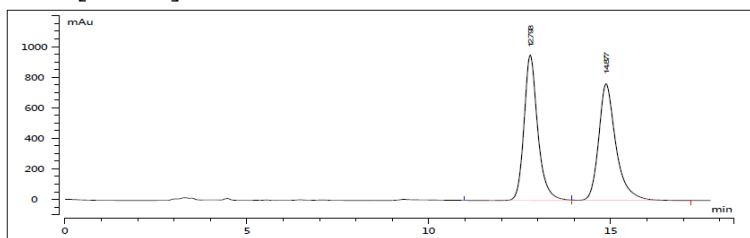

| No | Retention Time | Area      | % Area | Int Type |
|----|----------------|-----------|--------|----------|
| 1  | 12.793         | 24901.451 | 49.666 | BB       |
| 2  | 14.877         | 25236.485 | 50.334 | BB       |

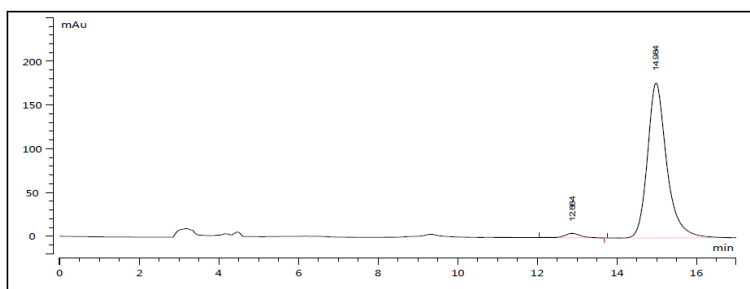

| No | Retention Time | Area     | % Area | Int Type |
|----|----------------|----------|--------|----------|
| 1  | 12.884         | 135.380  | 2.226  | BB       |
| 2  | 14.984         | 5947.134 | 97.774 | BB       |

**(2*S*,3'*S*,4'*S*,5'*S*)-5'-(difluoromethyl)-1''-methyl-4'-(thiophene-2-carbonyl)-3H-dispiro[benzo[*b*]thiophene-2,2'-pyrrolidine-3',3'-indoline]-2'',3-dione**

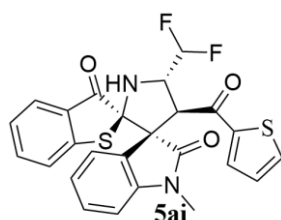

From 22.7 mg (0.1 mmol) of (*Z*)-2-((2,2-difluoroethyl)imino)benzo[*b*]thiophen-3(2*H*)-one **1a** and 32.2 mg (0.12 mmol, 1.2 equiv) of methyleneindolinone **4i**, 43.2 mg (87% yield) of compound **5ai** was obtained as a pink solid,  $[\alpha]_D^{25} = -433$  ( $c = 1.0$ ,  $\text{CHCl}_3$ ), Mp. = 62-63 °C. Dr (> 20:1) was determined by HPLC analysis. 96% ee was determined by HPLC analysis

(Daicel Chiralpak IB column, 230 nm, hexane/2-propanol 87:13, 1.0 mL/min). Retention time:  $t_{\text{major}} = 17.7$  min,  $t_{\text{minor}} = 15.9$  min.  $^1\text{H}$  NMR (400 MHz,  $\text{CDCl}_3$ )  $\delta$  7.79 (dd,  $J = 7.7, 0.6$  Hz, 1H), 7.67 (dd,  $J = 3.9, 0.9$  Hz, 1H), 7.60 – 7.37 (m, 3H), 7.32 (td,  $J = 7.8, 1.1$  Hz, 1H), 7.23 – 7.11 (m, 2H), 7.01 (dd,  $J = 8.2, 3.2$  Hz, 2H), 6.81 – 6.43 (m, 2H), 5.06 (d,  $J = 8.0$  Hz, 1H), 4.97 – 4.82 (m, 1H), 2.88 (s, 1H), 2.73 (s, 3H).  $^{13}\text{C}$  { $^1\text{H}$ } NMR (101 MHz,  $\text{CDCl}_3$ )  $\delta$  202.5, 185.6, 171.7, 147.7, 143.0, 143.0, 136.4, 135.0, 133.3, 129.9, 129.1, 127.9, 127.3, 127.2, 125.7, 125.5, 123.5, 123.3, 117.6 (t,  $J_{\text{C-F}} = 329.9, 242.4$  Hz), 108.2, 87.2, 68.5, 64.6, 59.9 (dd,  $J_{\text{C-F}} = 38.9, 32.3$  Hz), 52.9, 52.8, 27.8, 26.3, 22.2.  $^{19}\text{F}$  NMR (376 MHz,  $\text{CDCl}_3$ )  $\delta$  -119.0 (d,  $J = 295.6$  Hz, 1F), -123.3 (d,  $J = 295.9$  Hz, 1F). HRMS (ESI)  $m/z$  calcd for  $\text{C}_{25}\text{H}_{18}\text{F}_2\text{N}_2\text{NaO}_3\text{S}_2$   $[\text{M}+\text{Na}]^+$ : 519.0619, found 519.0619.

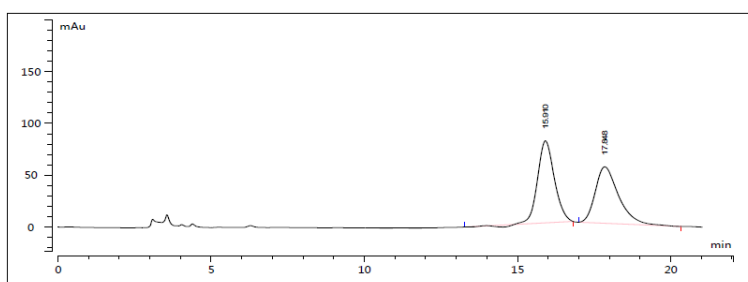

| No | Retention Time | Area     | % Area | Int Type |
|----|----------------|----------|--------|----------|
| 1  | 15.910         | 2981.669 | 50.930 | BB       |
| 2  | 17.848         | 2872.812 | 49.070 | BB       |

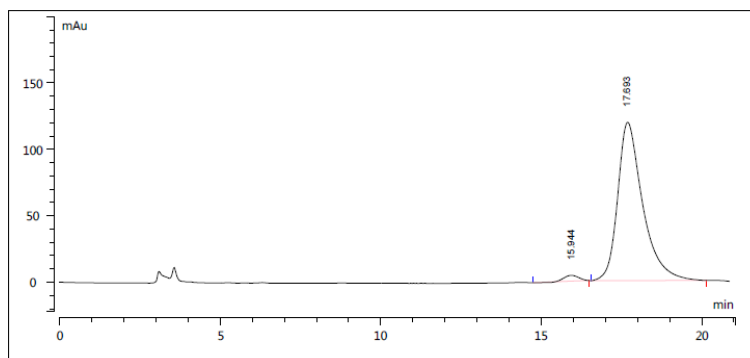

| No | Retention Time | Area     | % Area | Int Type |
|----|----------------|----------|--------|----------|
| 1  | 15.944         | 129.402  | 1.967  | BB       |
| 2  | 17.693         | 6450.332 | 98.033 | BB       |

**(2*S*,3'*S*,4'*S*,5'*S*)-5'-(difluoromethyl)-4'-(furan-2-carbonyl)-1'-methyl-3*H*-dispiro[benzo[*b*]thiophene-2,2'-pyrrolidine-3',3''-indoline]-2'',3-dione**

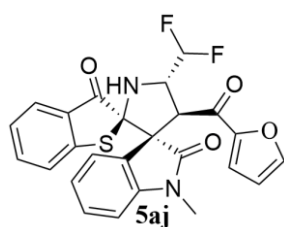

From 22.7 mg (0.1 mmol) of (*Z*)-2-((2,2-difluoroethyl)imino)benzo[*b*]thiophen-3(2*H*)-one **1a** and 30.4 mg (0.12 mmol, 1.2 equiv) of methyleneindolinone **4j**, 42.2 mg (88% yield) of compound **5aj** was obtained as a white solid,  $[\alpha]_D^{25} = -382$  ( $c = 1.0$ ,  $\text{CHCl}_3$ ), Mp. = 76-77 °C. Dr (> 20:1) was determined by HPLC analysis. 93% ee was determined by HPLC analysis

(Daicel Chiralpak IA column, 230 nm, hexane/2-propanol 80:20, 1.0 mL/min). Retention time:  $t_{\text{major}} = 19.1$  min,  $t_{\text{minor}} = 20.3$  min.  $^1\text{H}$  NMR (400 MHz,  $\text{CDCl}_3$ )  $\delta$  7.78 (d,  $J = 7.7$  Hz, 1H), 7.52 – 7.39 (m, 3H), 7.31 (td,  $J = 7.8, 1.1$  Hz, 1H), 7.23 – 7.10 (m, 3H), 7.01 (d,  $J = 7.9$  Hz, 1H), 6.78 – 6.43 (m, 2H), 6.41 (dd,  $J = 3.6, 1.6$  Hz, 1H), 5.02 – 4.80 (m, 2H), 2.87 (d,  $J = 17.8$  Hz, 4H).  $^{13}\text{C}$   $\{^1\text{H}\}$  NMR (101 MHz,  $\text{CDCl}_3$ )  $\delta$  202.4, 180.8, 177.7, 171.6, 151.2, 147.7, 147.5, 143.0, 136.4, 129.9, 129.1, 127.2, 127.2, 125.6, 125.5, 123.5, 123.3, 119.5, 117.6 (t,  $J_{\text{C-F}} = 329.9, 243.9$  Hz), 112.2, 108.2, 87.4, 68.5, 64.3, 59.6 (dd,  $J_{\text{C-F}} = 38.9, 32.3$  Hz), 52.1, 52.0, 27.8, 26.4, 22.2.  $^{19}\text{F}$  NMR (376 MHz,  $\text{CDCl}_3$ )  $\delta$  -118.9 (d,  $J = 295.6$  Hz, 1F), -123.3 (d,  $J = 295.6$  Hz, 1F). HRMS (ESI)  $m/z$  calcd for  $\text{C}_{25}\text{H}_{18}\text{F}_2\text{N}_2\text{NaO}_4\text{S}$   $[\text{M}+\text{Na}]^+$ : 503.0848, found 503.0848.

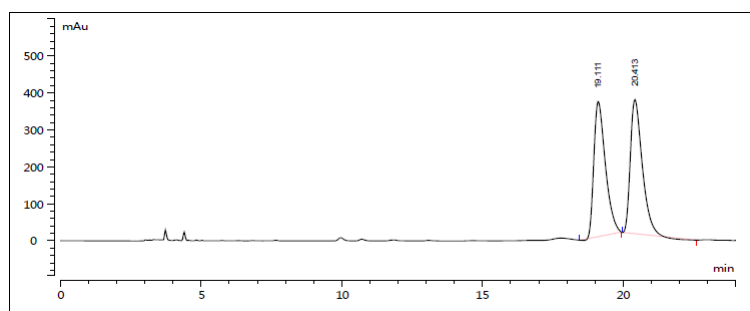

| No | Retention Time | Area      | % Area | Int Type |
|----|----------------|-----------|--------|----------|
| 1  | 19.111         | 10417.963 | 49.552 | BB       |
| 2  | 20.413         | 10606.287 | 50.448 | BB       |

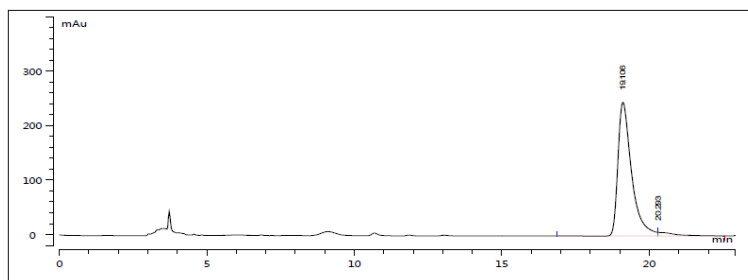

| No | Retention Time | Area     | % Area | Int Type |
|----|----------------|----------|--------|----------|
| 1  | 19.106         | 7846.068 | 96.787 | BB       |
| 2  | 20.293         | 260.471  | 3.213  | BB       |

**(2*S*,3'*S*,4'*S*,5'*S*)-4'-acetyl-5'-(difluoromethyl)-1''-methyl-3*H*-dispiro[benzo[*b*]thiophene-2,2'-pyrrolidine-3',3''-indoline]-2'',3-dione**

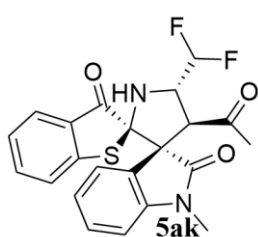

From 22.7 mg (0.1 mmol) of (*Z*)-2-((2,2-difluoroethyl)imino)benzo[*b*]thiophen-3(2*H*)-one **1a** and 24.1 mg (0.12 mmol, 1.2 equiv) of methyleneindolinone **4k**, 34.2 mg (80% yield) of compound **5ak** was obtained as a white solid,  $[\alpha]_D^{25} = -350$  ( $c = 1.0$ ,  $\text{CHCl}_3$ ), Mp. = 89-90 °C. Dr ( $> 20:1$ ) was determined by HPLC analysis. 91% ee was determined by HPLC analysis (Daicel Chiralcel OD-H column, 230 nm, hexane/2-propanol

80:20, 1.0 mL/min). Retention time:  $t_{\text{major}} = 12.9$  min,  $t_{\text{minor}} = 14.3$  min.  $^1\text{H}$  NMR (400 MHz,  $\text{CDCl}_3$ )  $\delta$  7.74 (dd,  $J = 7.7, 0.6$  Hz, 1H), 7.53 – 7.32 (m, 3H), 7.22 – 7.09 (m, 2H), 7.01 (d,  $J = 7.9$  Hz, 1H), 6.88 (d,  $J = 7.8$  Hz, 1H), 6.53 (ddd,  $J = 58.3, 56.7, 7.1$  Hz, 1H), 4.70 – 4.55 (m, 1H), 4.42 (d,  $J = 8.1$  Hz, 1H), 3.13 (s, 3H), 2.78 (s, 1H), 1.75 (s, 3H).  $^{13}\text{C}\{^1\text{H}\}$  NMR (101 MHz,  $\text{CDCl}_3$ )  $\delta$  202.1, 200.5, 171.7, 147.7, 143.4, 136.4, 130.1, 128.8, 127.6, 127.3, 125.7, 124.9, 123.7, 123.2, 117.6 (dd,  $J_{\text{C-F}} = 329.5, 324.7$  Hz), 108.5, 87.4, 62.6, 59.0 (dd,  $J_{\text{C-F}} = 38.2, 32.1$  Hz), 56.9, 56.8, 29.1, 26.8.  $^{19}\text{F}$  NMR (376 MHz,  $\text{CDCl}_3$ )  $\delta$  -119.0 (d,  $J = 295.2$  Hz, 1F), -123.0 (d,  $J = 295.6$  Hz, 1F). HRMS (ESI)  $m/z$  calcd for  $\text{C}_{22}\text{H}_{18}\text{F}_2\text{N}_2\text{NaO}_3\text{S}$   $[\text{M}+\text{Na}]^+$ : 451.1025, found 451.1025.

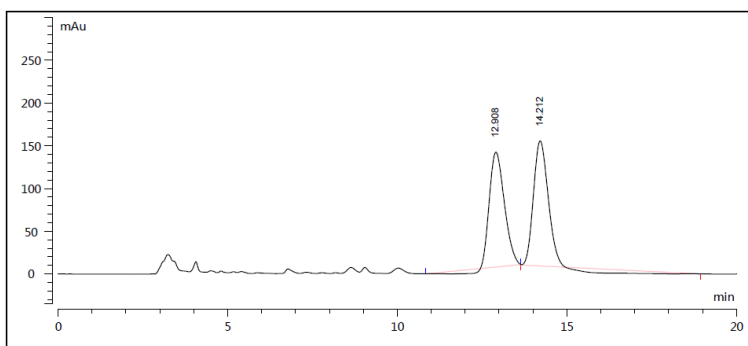

| No | Retention Time | Area     | % Area | Int Type |
|----|----------------|----------|--------|----------|
| 1  | 12.908         | 3916.171 | 50.768 | BB       |
| 2  | 14.212         | 3797.694 | 49.232 | BB       |

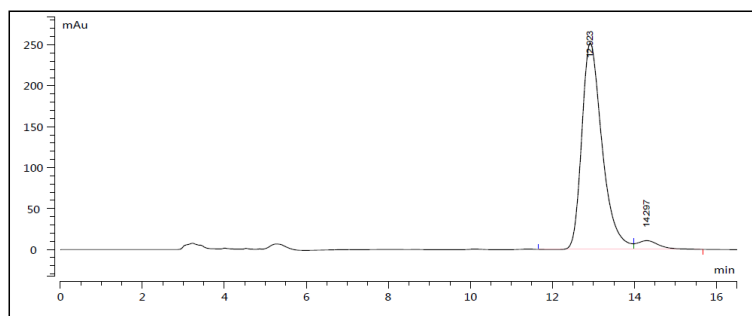

| No | Retention Time | Area     | % Area | Int Type |
|----|----------------|----------|--------|----------|
| 1  | 12.923         | 8676.302 | 95.622 | BB       |
| 2  | 14.297         | 397.282  | 4.378  | BB       |

## 8. Gram-scale asymmetric cycloaddition for the synthesis of **3aa**

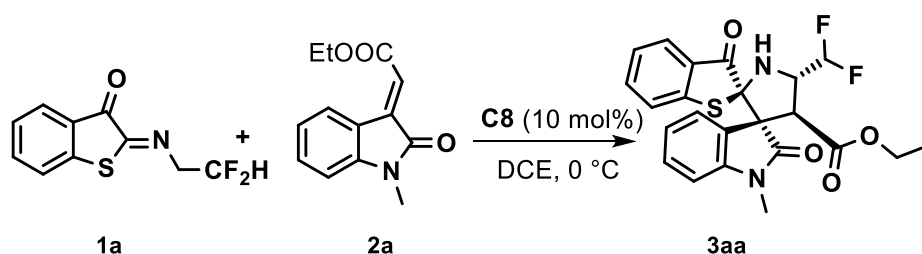

2.5 mmol  
0.567 g

3.0 mmol  
0.693 g

1.05 g, 92% yield  
> 20:1 dr, 96% ee

To a dried 50 mL bottle were added **1a** (2.5 mmol, 0.567 g), **2a** (3.0 mmol, 0.693 g) and catalyst **C8** (157.6 mg, 0.25 mmol, 10 mol %) in 25 mL dry 1,2-dichloroethane (DCE). After stirring at 0°C for 4.5 h, the **1a** was completely consumed as detected by TLC analysis (petroleum ether / EtOAc = 4:1). Product **3aa** was obtained by silica gel column chromatography (petroleum ether / EtOAc = 4:1), as a white solid (1.05 g, 92% yield) with >20:1 dr and 96% ee.

## 9. Gram-scale asymmetric cycloaddition for the synthesis of **3ag**

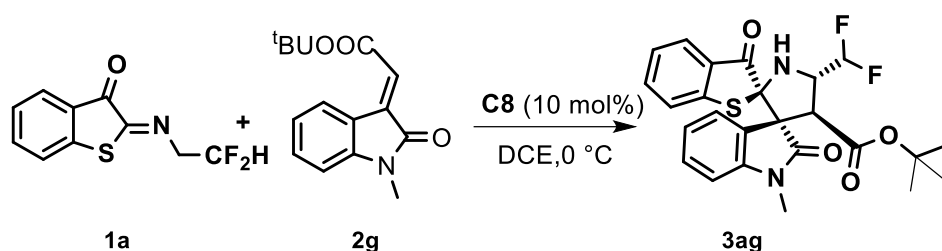

**1a**

**2g**

**3ag**

To a dried 50 mL bottle were added **1a** (2.5 mmol, 0.567 g), **2g** (3.0 mmol, 0.777 g) and catalyst **C8** (157.6 mg, 0.25 mmol, 10 mol %) in 25 mL dry 1,2-dichloroethane (DCE). After stirring at 0°C for 8 h, the **1a** was completely consumed as detected by TLC analysis (petroleum ether / EtOAc = 10:1). Product **3ag** was obtained by silica gel column chromatography (petroleum ether / EtOAc = 10:1), as a white solid (1.21 g, 83% yield) with >20:1 dr and 96% ee.



## 10. Synthetic transformation of 3aa

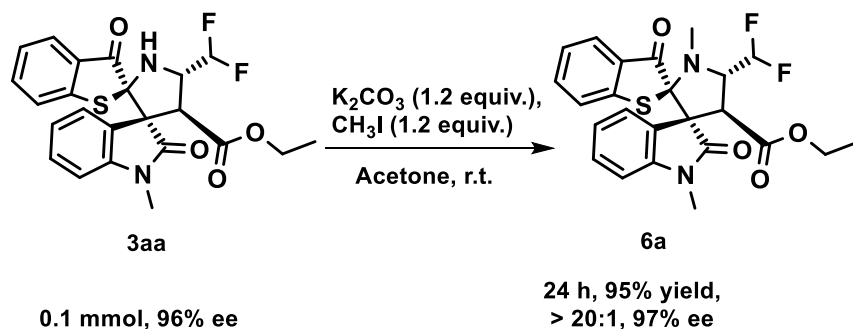

To a dried 5 mL bottle were added **3aa** (0.1 mmol, 45.8 mg) and  $K_2CO_3$  (16.6 mg, 0.12 mmol, 1.2e) in 1 mL dry Acetone. The mixture was stirred at room temperature for 30 min, and Iodomethane ( $CH_3I$ ) (17.0 mg, 0.12 mmol, 1.2e) was then added. After stirring at room temperature for 24 h, the **3aa** was completely consumed as detected by TLC analysis (petroleum ether / EtOAc = 5:1). Product **6a** was obtained by silica gel column chromatography (petroleum ether / EtOAc = 5:1), as a yellow solid (44.8 mg, 95% yield) with >20:1 dr and 97% ee.  $[\alpha]_D^{25} = +19$  ( $c = 1.0$ ,  $CHCl_3$ ), Mp. = 50-51 °C. Dr (> 20:1) was determined by HPLC analysis. 97% ee was determined by HPLC analysis (Daicel Chiralpak IB column, 230 nm, hexane/2-propanol 80:20, 1.0 mL/min). Retention time:  $t_{major} = 8.4$  min,  $t_{minor} = 7.3$  min.  $^1H$  NMR (400 MHz,  $CDCl_3$ )  $\delta$  7.91 (dd,  $J = 7.8, 1.3$  Hz, 1H), 7.64 – 7.37 (m, 1H), 7.36 – 7.23 (m, 2H), 7.23 – 7.14 (m, 1H), 7.04 – 6.94 (m, 2H), 6.88 (d,  $J = 7.8$  Hz, 1H), 6.29 (td,  $J = 55.2, 3.5$  Hz, 1H), 5.41 (dtd,  $J = 15.9, 8.9, 3.5$  Hz, 1H), 4.03 (d,  $J = 8.4$  Hz, 1H), 3.85 – 3.59 (m, 2H), 3.35 (s, 3H), 2.33 (s, 3H), 0.69 (t,  $J = 7.1$  Hz, 3H).  $^{13}C\{^1H\}$  NMR (101 MHz,  $CDCl_3$ )  $\delta$  187.7, 173.9, 171.1, 168.1, 144.5, 142.8, 133.2, 132.8, 130.0, 126.2, 124.6, 123.9, 123.6, 122.6, 114.3 (t,  $J_{C-F} = 329.4$  Hz), 108.7, 76.1, 75.8, 75.6, 66.9, 61.3, 51.4, 27.0, 16.4, 13.4.  $^{19}F$  NMR (376 MHz,  $CDCl_3$ )  $\delta$  -114.0 (d,  $J = 288.8$  Hz, 1F), -127.1 (d,  $J = 301.7$  Hz, 1F). HRMS (ESI)  $m/z$  calcd for  $C_{24}H_{22}F_2N_2NaO_4S$   $[M+Na]^+$ : 495.1147, found 495.1147.

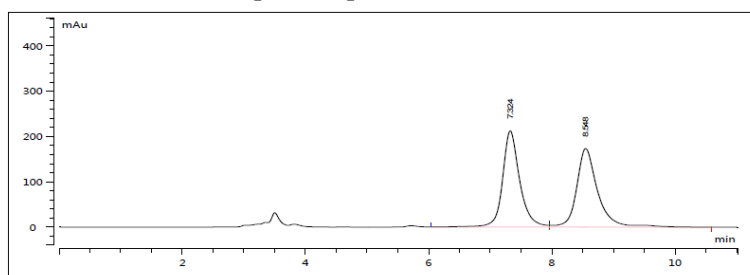

| No | Retention Time | Area     | % Area | Int Type |
|----|----------------|----------|--------|----------|
| 1  | 7.324          | 4098.591 | 49.817 | BB       |
| 2  | 8.548          | 4128.723 | 50.183 | BB       |

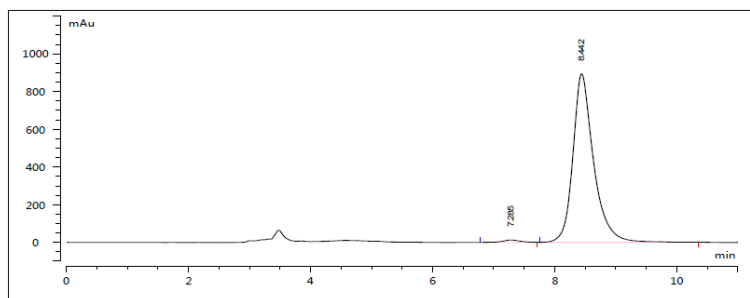

| No | Retention Time | Area      | % Area | Int Type |
|----|----------------|-----------|--------|----------|
| 1  | 7.285          | 240.712   | 1.134  | BB       |
| 2  | 8.442          | 20981.486 | 98.866 | BB       |

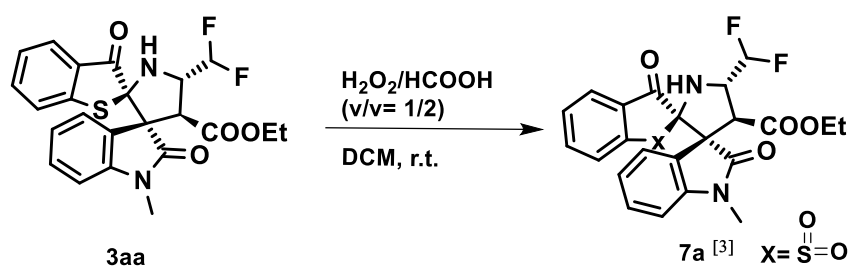

0.2 mmol, 96% ee

3 h, 50% yield  
>20:1 dr, 94% ee

To a solution of **3aa** (0.2 mmol, 91.6 mg) in  $\text{CH}_2\text{Cl}_2$  (1.5 mL), mixture of 33%  $\text{H}_2\text{O}_2$  (0.2 mL) and  $\text{HCO}_2\text{H}$  (0.4 mL) was added at 5–10 °C with vigorous stirring. Then it was stirred at room temperature for 3 h. Then, the reaction mixture was poured into saturated aqueous solution of  $\text{NaHCO}_3$  (3 mL) and extracted with  $\text{CH}_2\text{Cl}_2$  (3 x 3 mL) and dried ( $\text{Na}_2\text{SO}_4$ ). Removal of solvent followed by column chromatographic purification (silica gel; 50% ethyl acetate in hexane) furnished **7a** as a colorless solid (49.1 mg, 50% yield) with >20:1 dr and 94% ee.  $[\alpha]_{\text{D}}^{25} = -305$  ( $c = 1.0$ ,  $\text{CHCl}_3$ ), Mp. = 90–91 °C. Dr (> 20:1) was determined by HPLC analysis. 94% ee was determined by HPLC analysis (Daicel Chiralpak IA column, 230 nm, hexane/2-propanol 50:50, 1.0 mL/min). Retention time:  $t_{\text{major}} = 11.7$  min,  $t_{\text{minor}} = 8.8$  min.  $^1\text{H}$  NMR (400 MHz,  $\text{CDCl}_3$ )  $\delta$  7.73 (d,  $J = 3.9$  Hz, 2H), 7.60 (d,  $J = 7.7$  Hz, 1H), 7.51–7.43 (m, 1H), 7.19 (td,  $J = 7.7, 1.4$  Hz, 1H), 6.85 (d,  $J = 7.8$  Hz, 1H), 6.70–6.32 (m, 3H), 6.04 (s, 1H), 5.09 (dtd,  $J = 13.4, 6.7, 3.3$  Hz, 1H), 3.97 (d,  $J = 6.3$  Hz, 1H), 3.80–3.63 (m, 2H), 3.39 (s, 3H), 0.66 (t,  $J = 7.1$  Hz, 3H).  $^{13}\text{C}\{^1\text{H}\}$  NMR (101 MHz,  $\text{CDCl}_3$ )  $\delta$  189.1, 174.0, 166.9, 146.3, 143.9, 135.3, 132.3, 130.2, 128.5, 127.4, 125.5, 124.1, 122.9, 122.7, 116.6 (t,  $J_{\text{C-F}} = 235.4$  Hz), 108.8, 92.5, 64.7, 64.5, 64.4, 64.2, 61.6, 59.3, 49.1, 49.0, 27.0, 13.4.  $^{19}\text{F}$  NMR (376 MHz,  $\text{CDCl}_3$ )  $\delta$  -115.4 (d,  $J = 297.1$  Hz, 1F), -123.7 (d,  $J = 297.1$  Hz, 1F). HRMS (ESI)  $m/z$  calcd for  $\text{C}_{23}\text{H}_{20}\text{F}_2\text{N}_2\text{NaO}_6\text{S}$   $[\text{M}+\text{Na}]^+$ : 513.0902, found 513.0902.

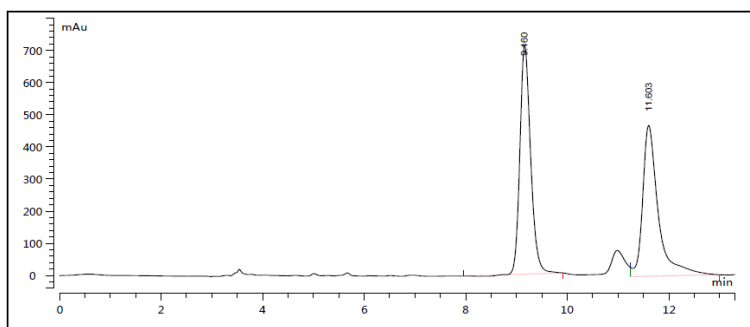

| No | Retention Time | Area      | % Area | Int Type |
|----|----------------|-----------|--------|----------|
| 1  | 9.160          | 10410.138 | 50.888 | BB       |
| 2  | 11.603         | 10046.984 | 49.112 | BB       |

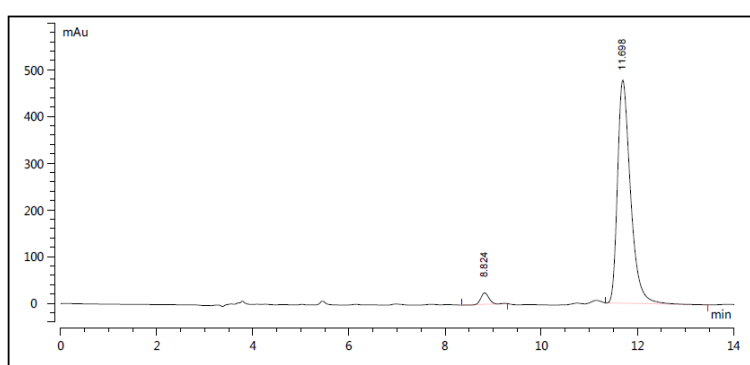

| No | Retention Time | Area     | % Area | Int Type |
|----|----------------|----------|--------|----------|
| 1  | 8.824          | 274.723  | 2.979  | BB       |
| 2  | 11.698         | 8948.205 | 97.021 | BB       |

## 11. X-ray Structures of Compounds 3aa and 3ag

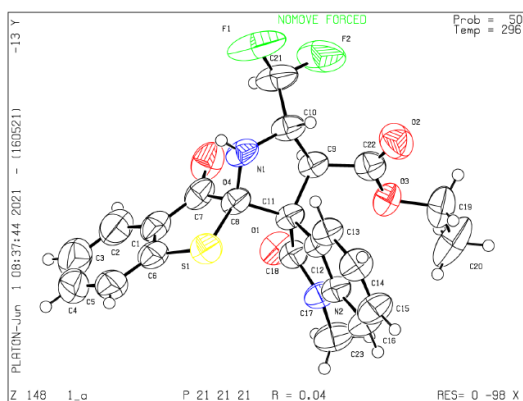

3aa

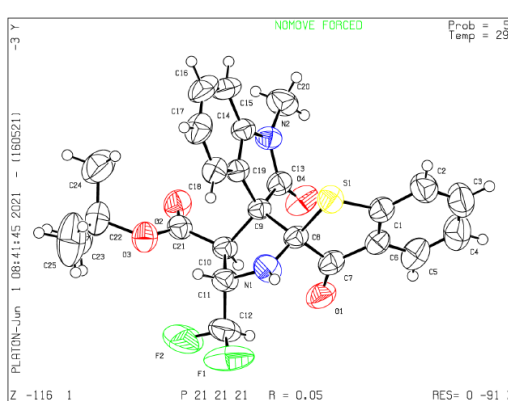

3ag

## 12. Copies of $^1\text{H}$ , $^{19}\text{F}$ and $^{13}\text{C}\{^1\text{H}\}$ NMR Spectra

7.932  
7.930  
7.908  
7.907  
7.904  
7.902  
7.691  
7.686  
7.665  
7.661  
7.640  
7.635  
7.464  
7.438  
7.391  
7.388  
7.366  
7.363  
7.341  
7.338  
6.537  
6.522  
6.507  
6.352  
6.337  
6.322  
6.167  
6.152  
6.137

3.997  
3.982  
3.950  
3.935  
3.902  
3.887

0.000

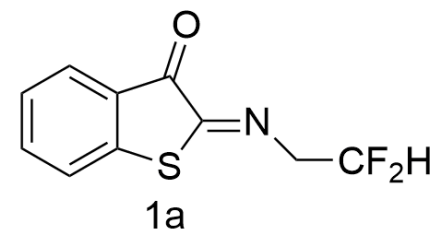

<sup>1</sup>H NMR (300 MHz, CDCl<sub>3</sub>)

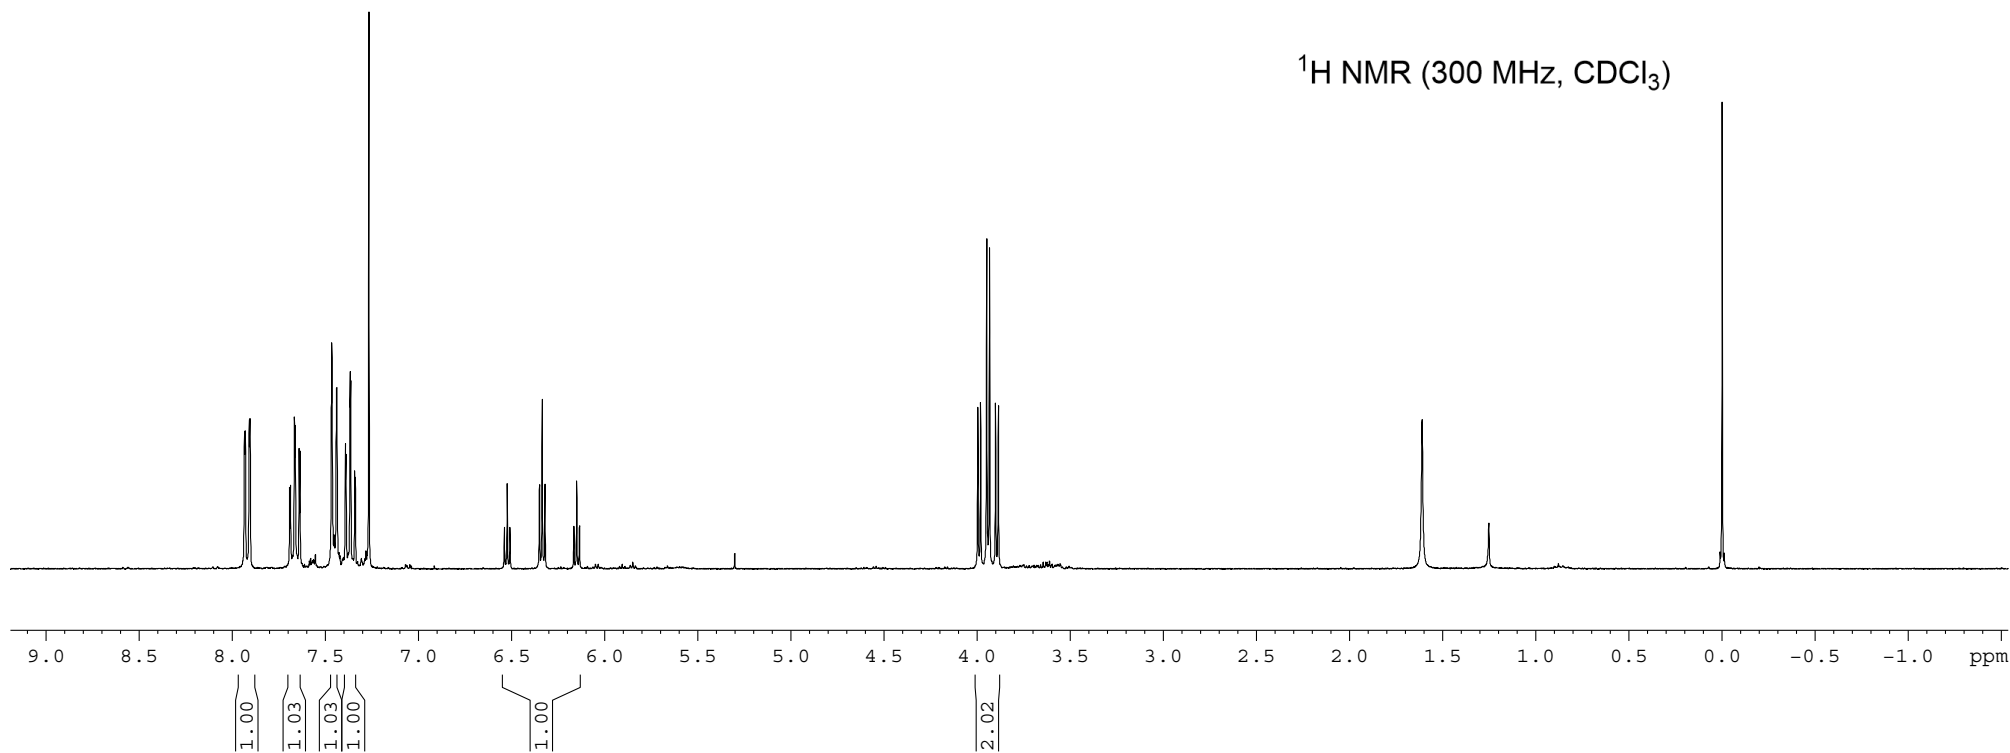

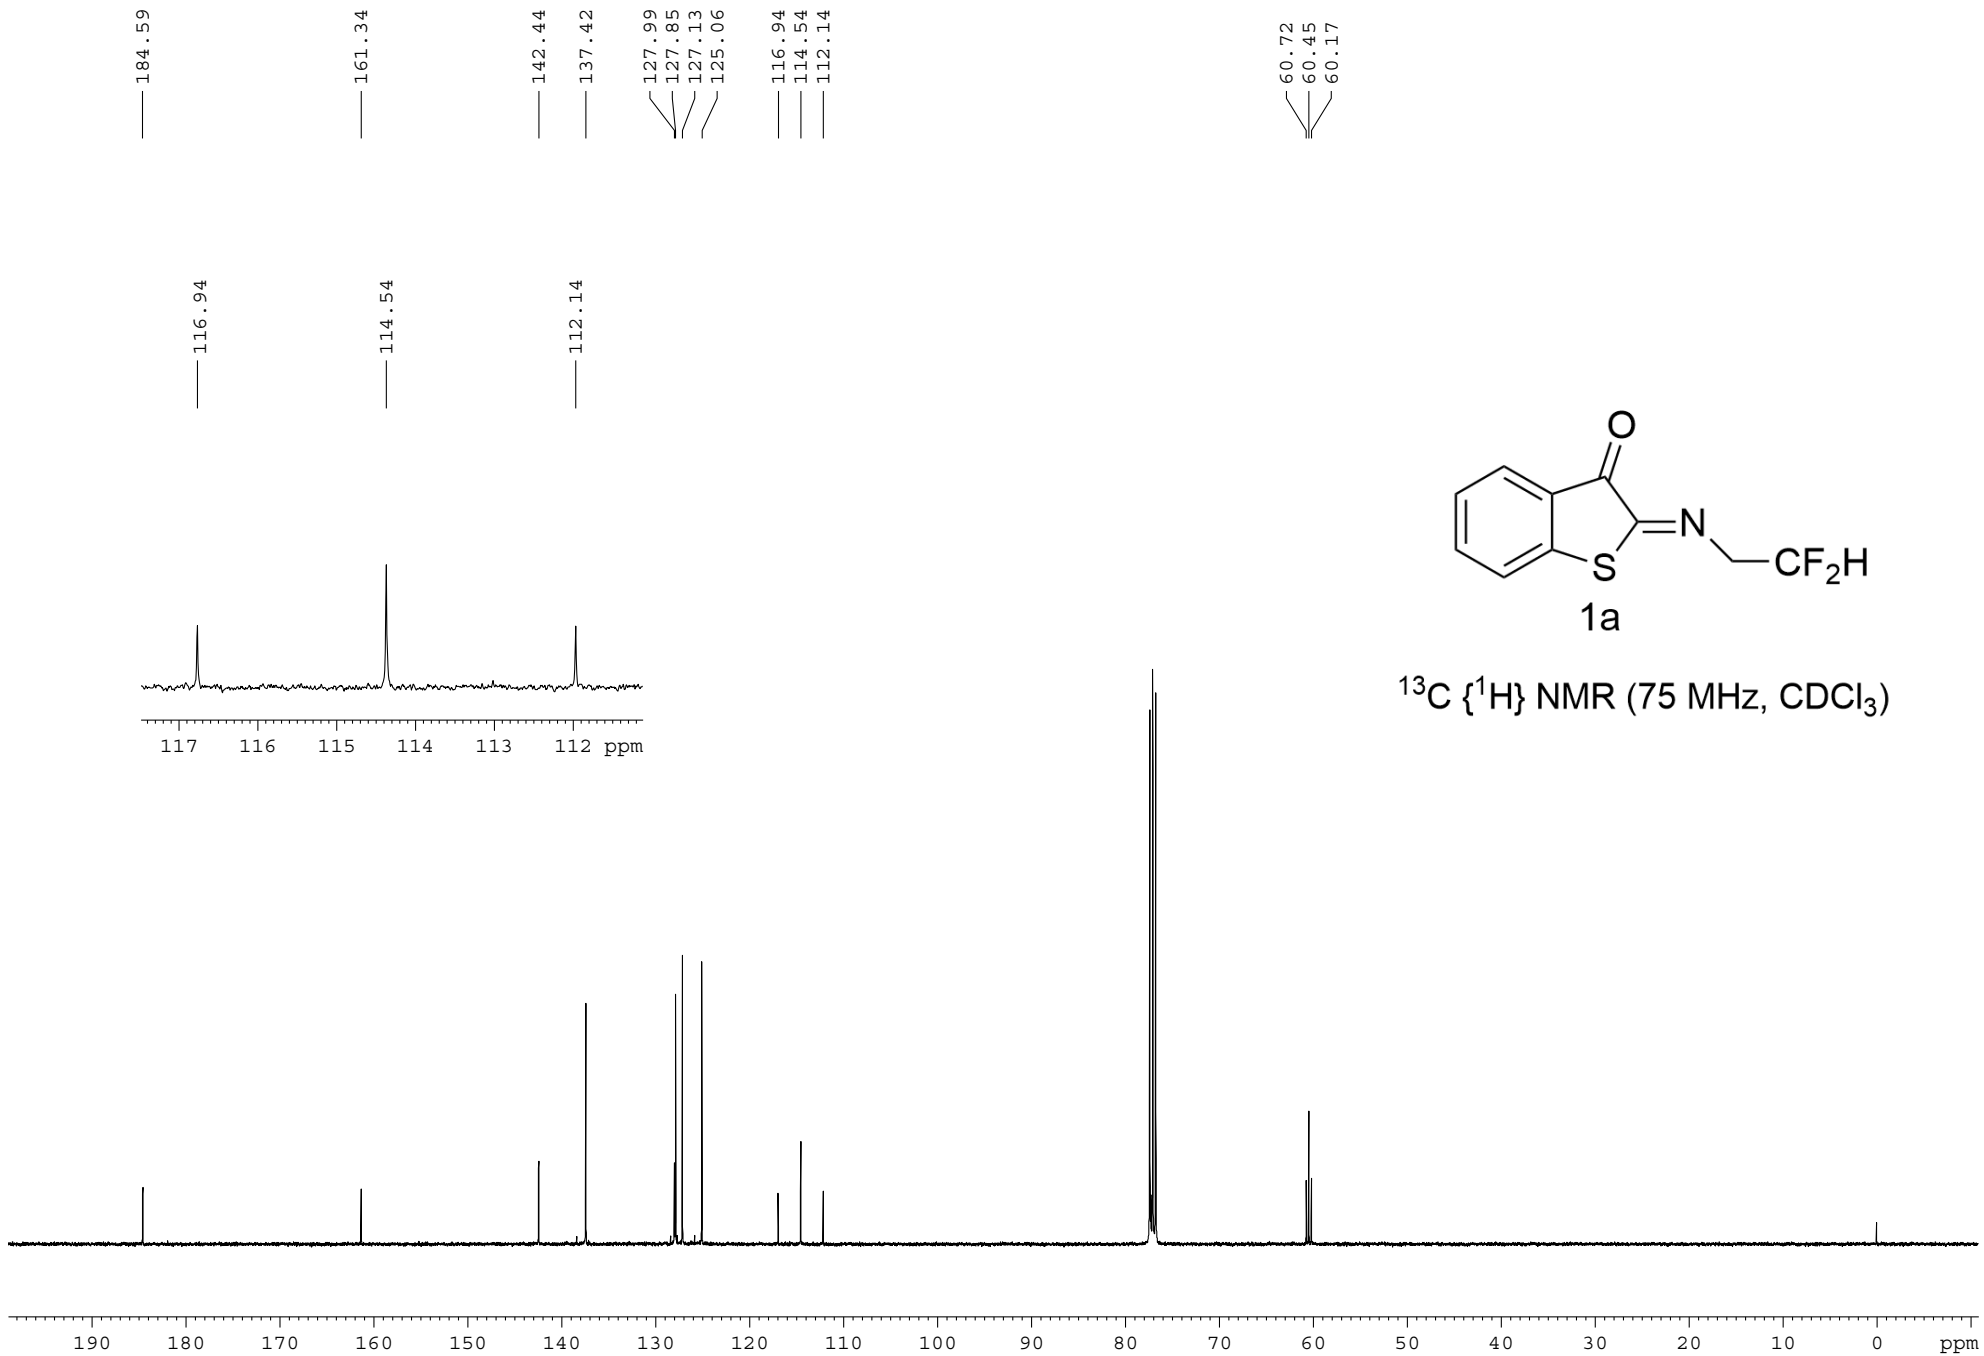

-120.506

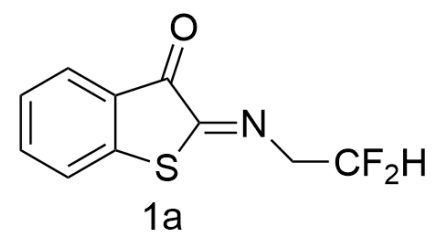

<sup>19</sup>F NMR (282 MHz, CDCl<sub>3</sub>)

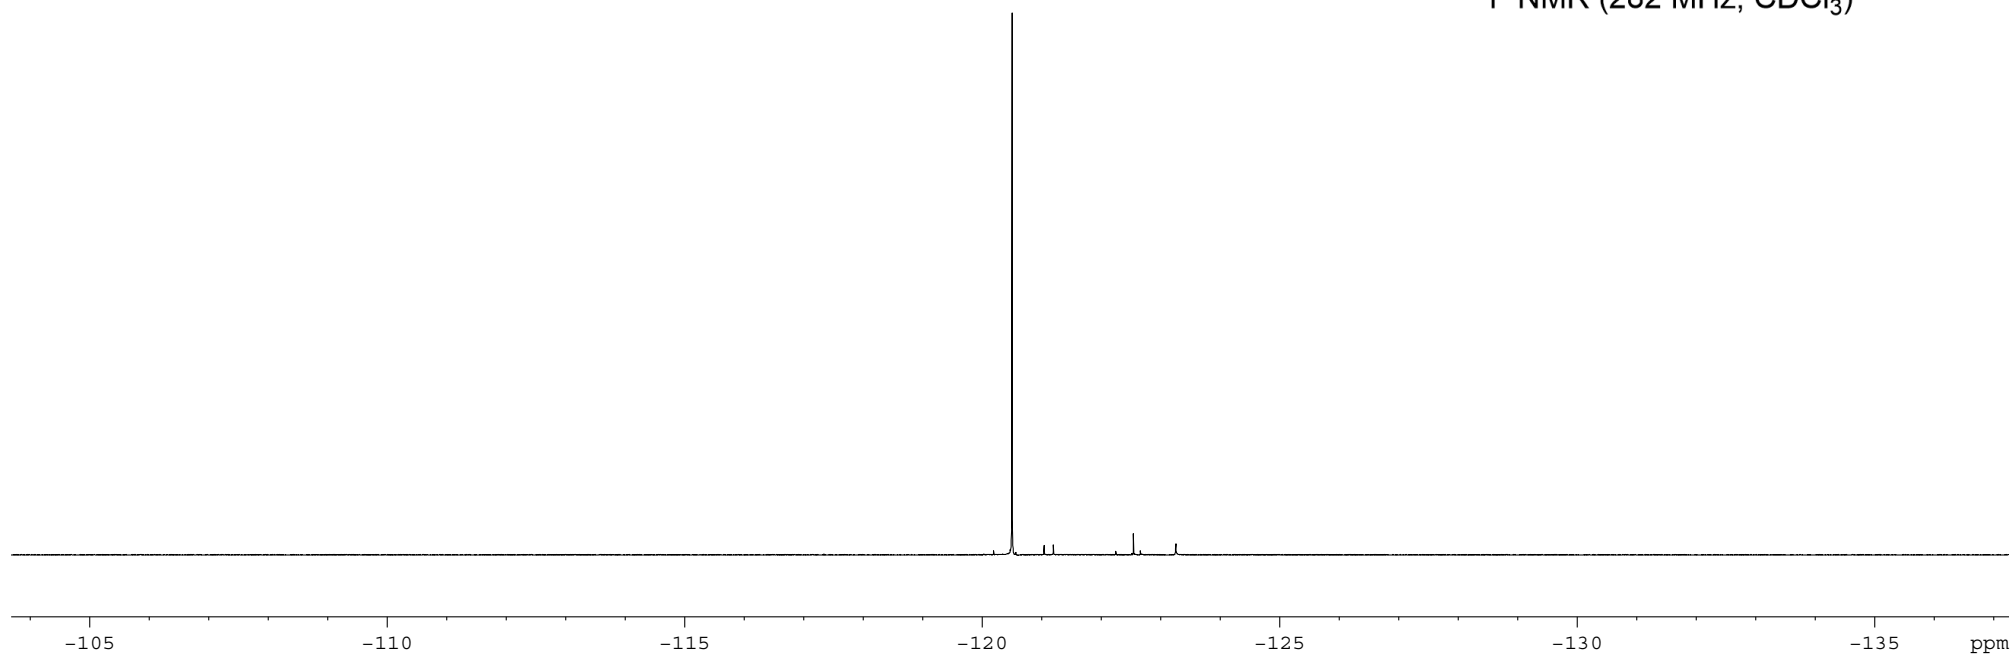

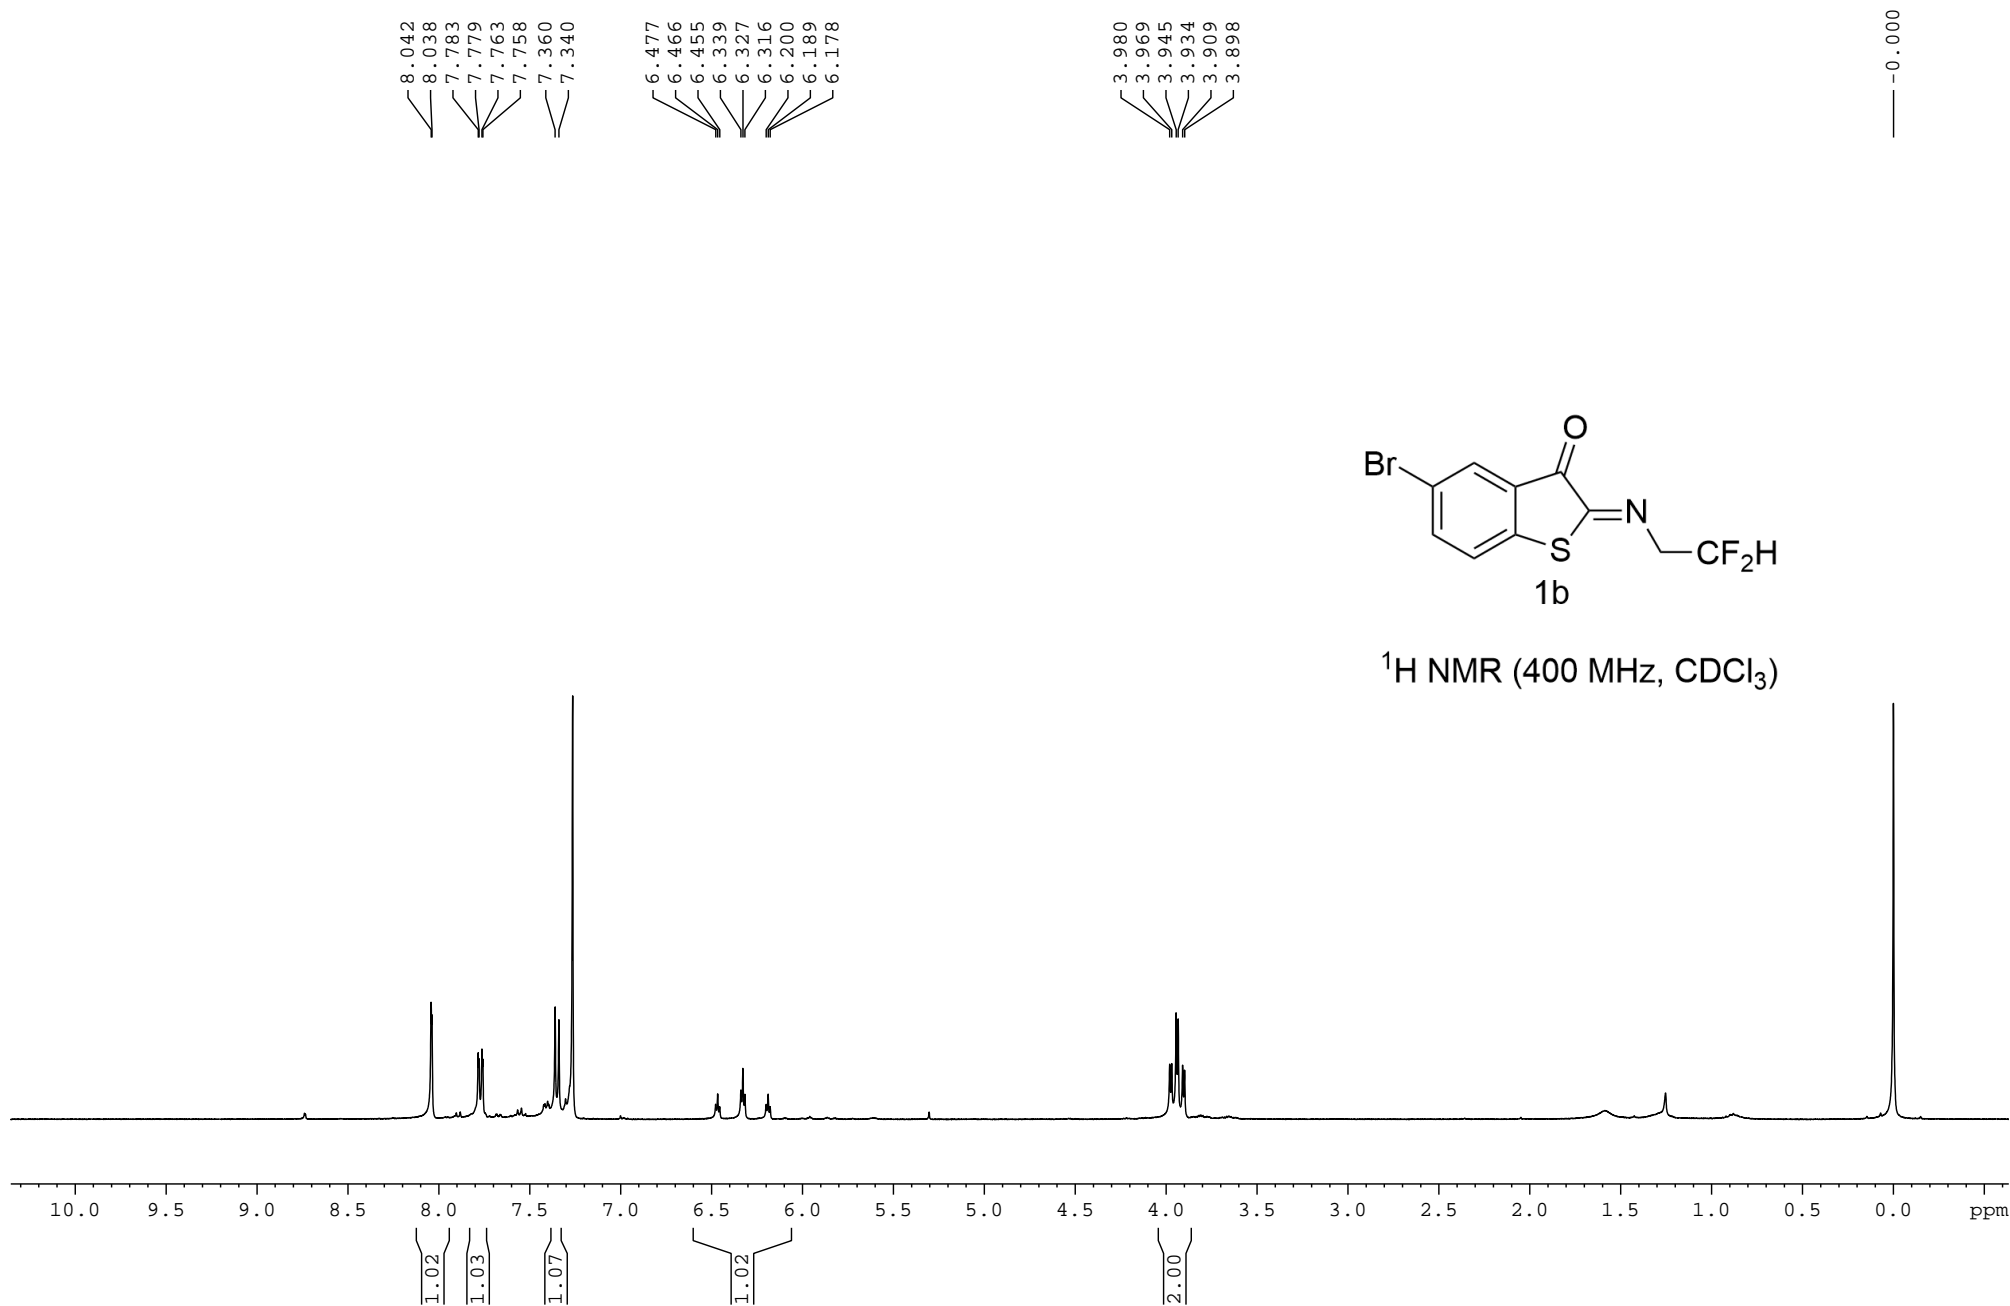

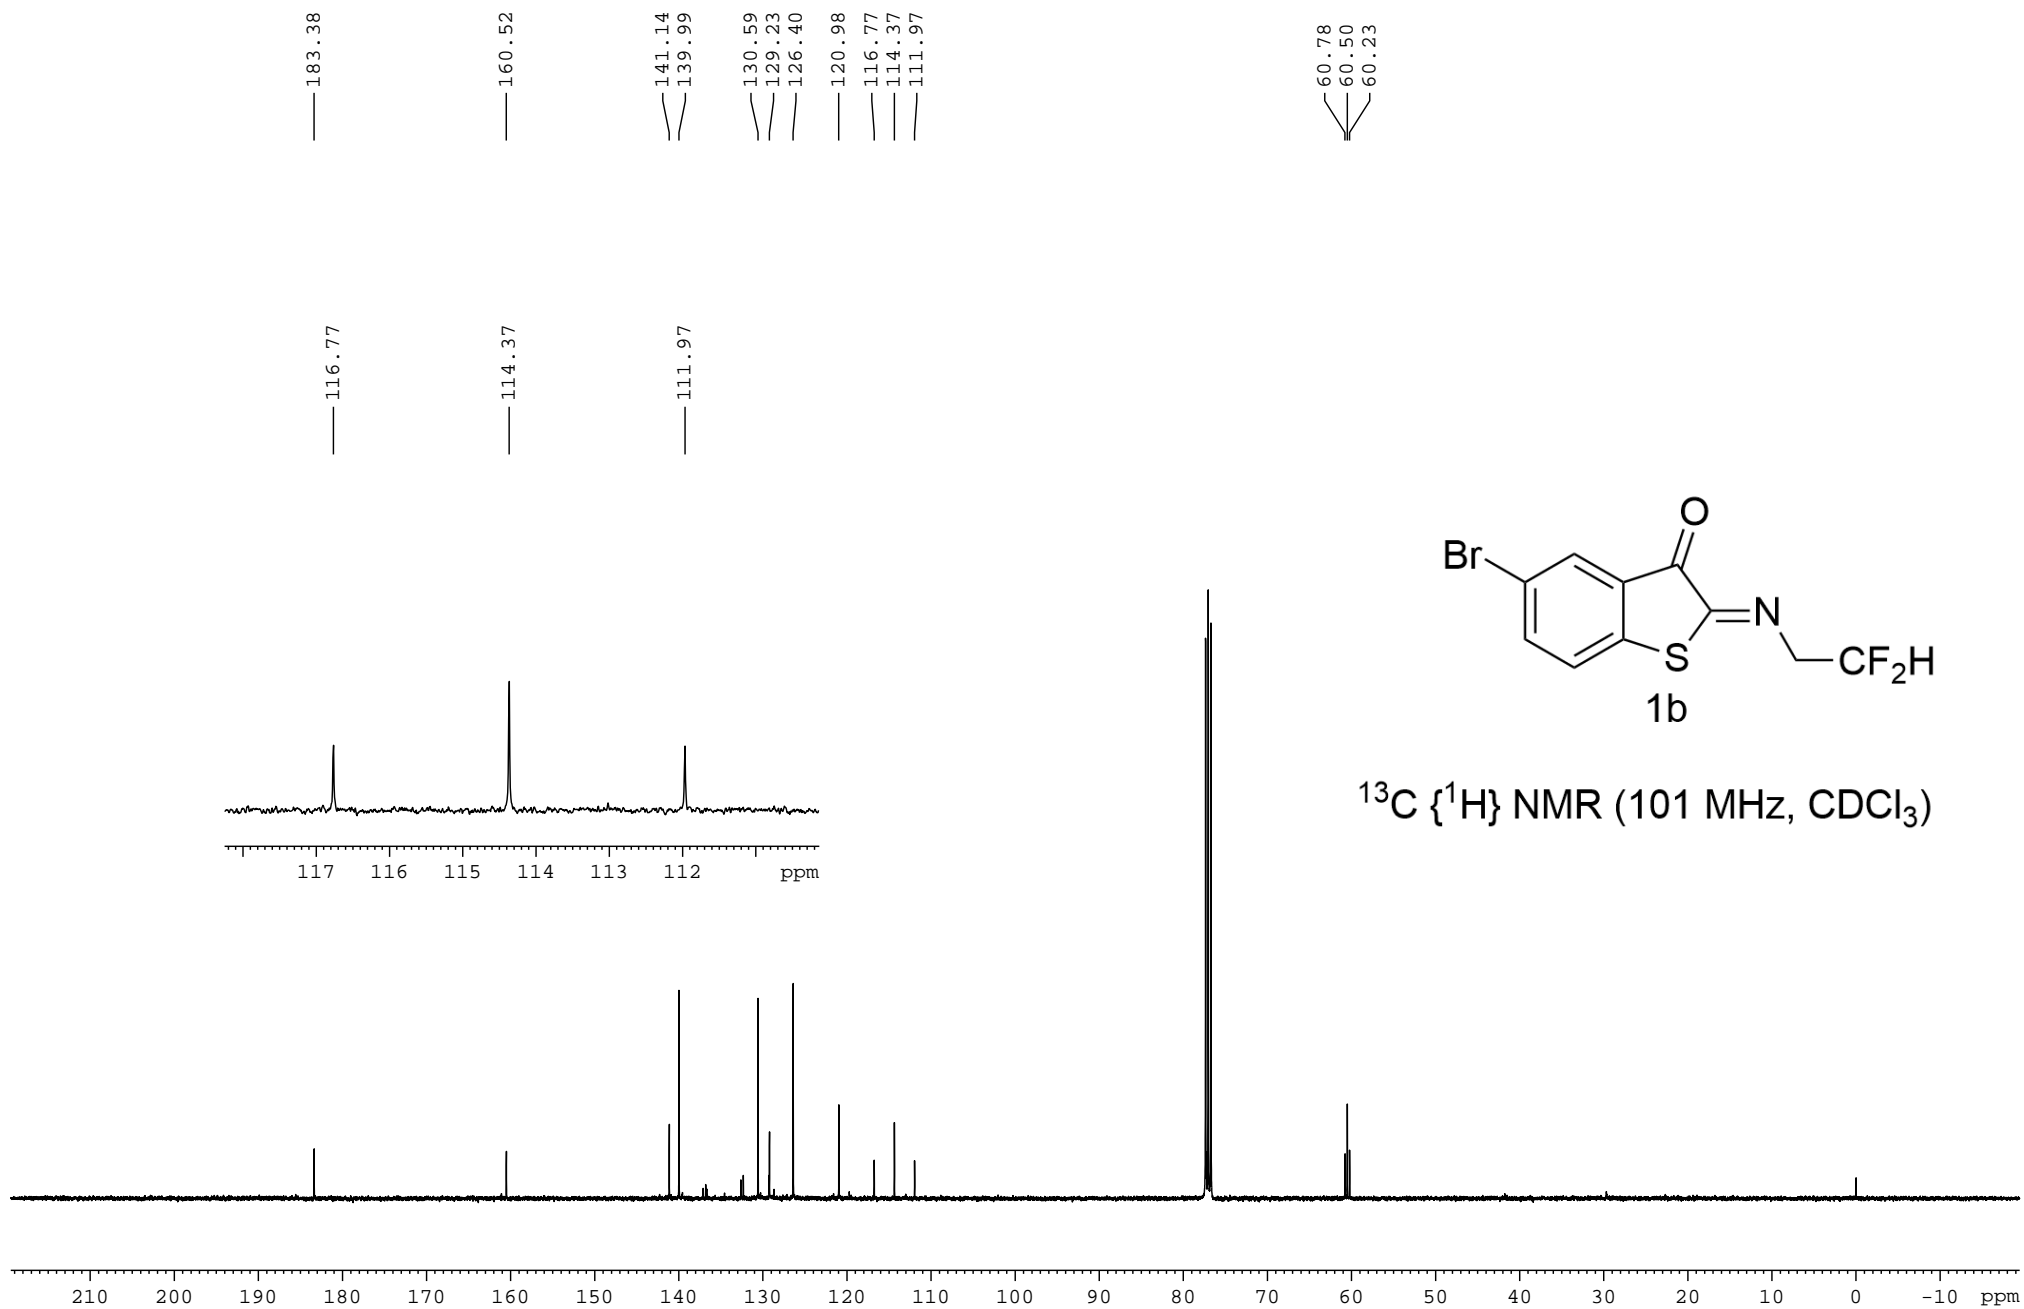



-120.494

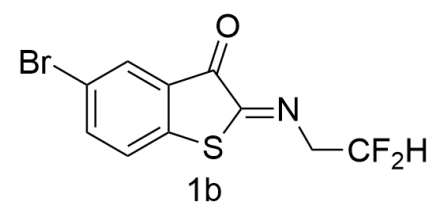

$^{19}\text{F}$  NMR (376 MHz,  $\text{CDCl}_3$ )

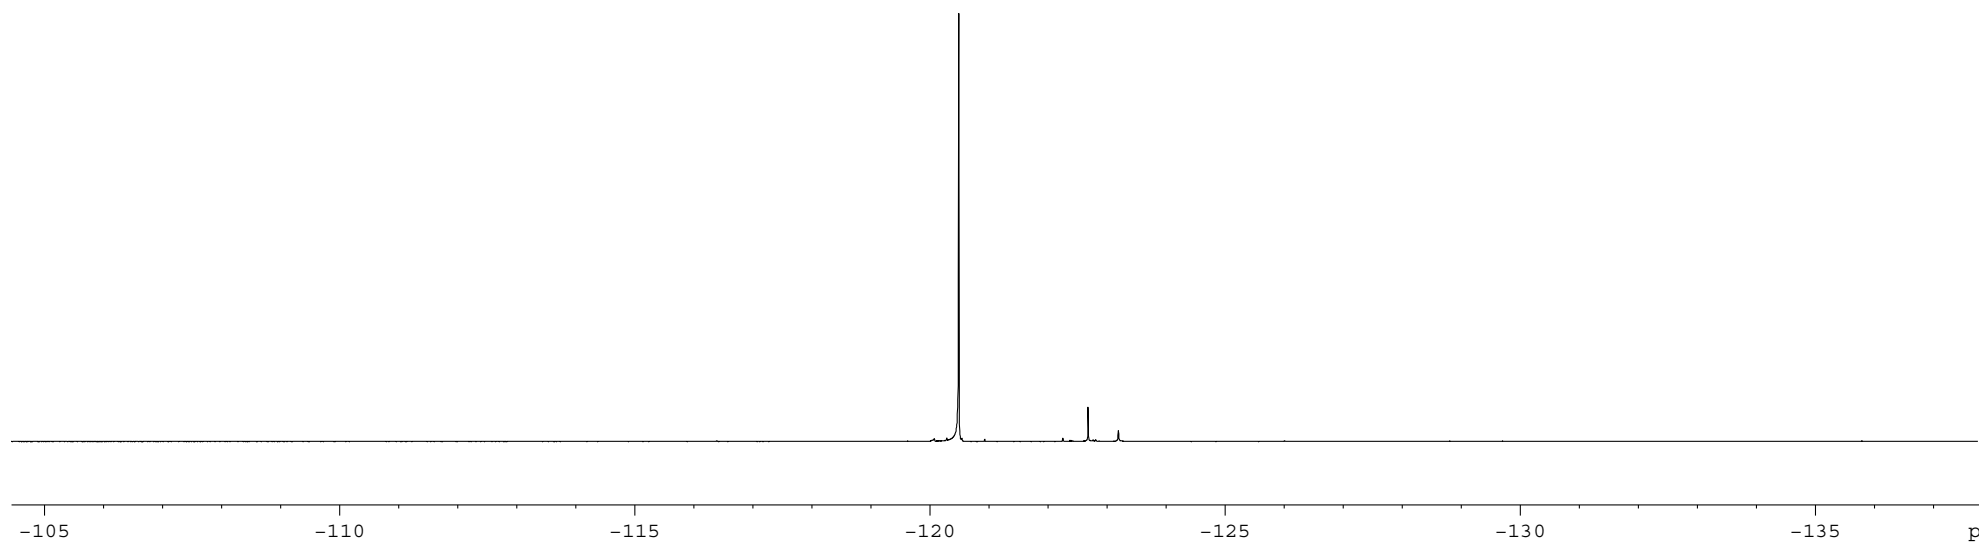

7.944  
7.939  
7.723  
7.718  
7.702  
7.697  
7.385  
7.364

3.973  
3.962  
3.938  
3.926  
3.902  
3.891

1.346

0.000

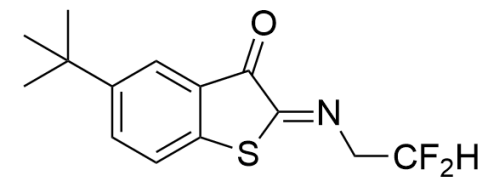

1c

<sup>1</sup>H NMR (400 MHz, CDCl<sub>3</sub>)

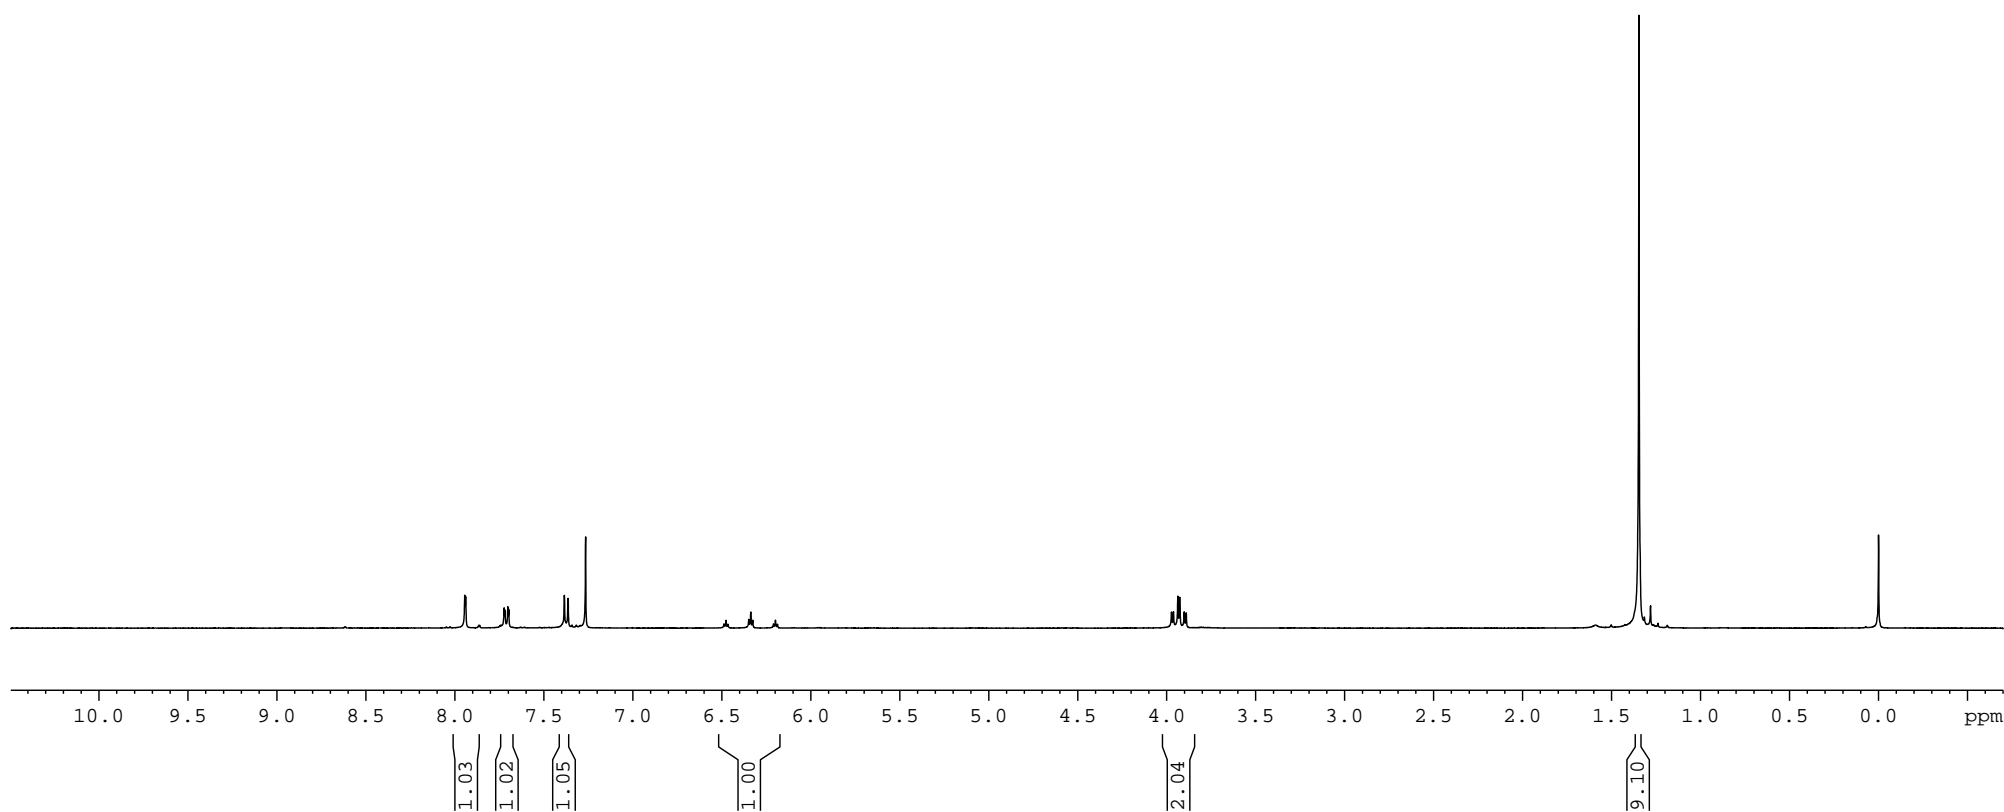

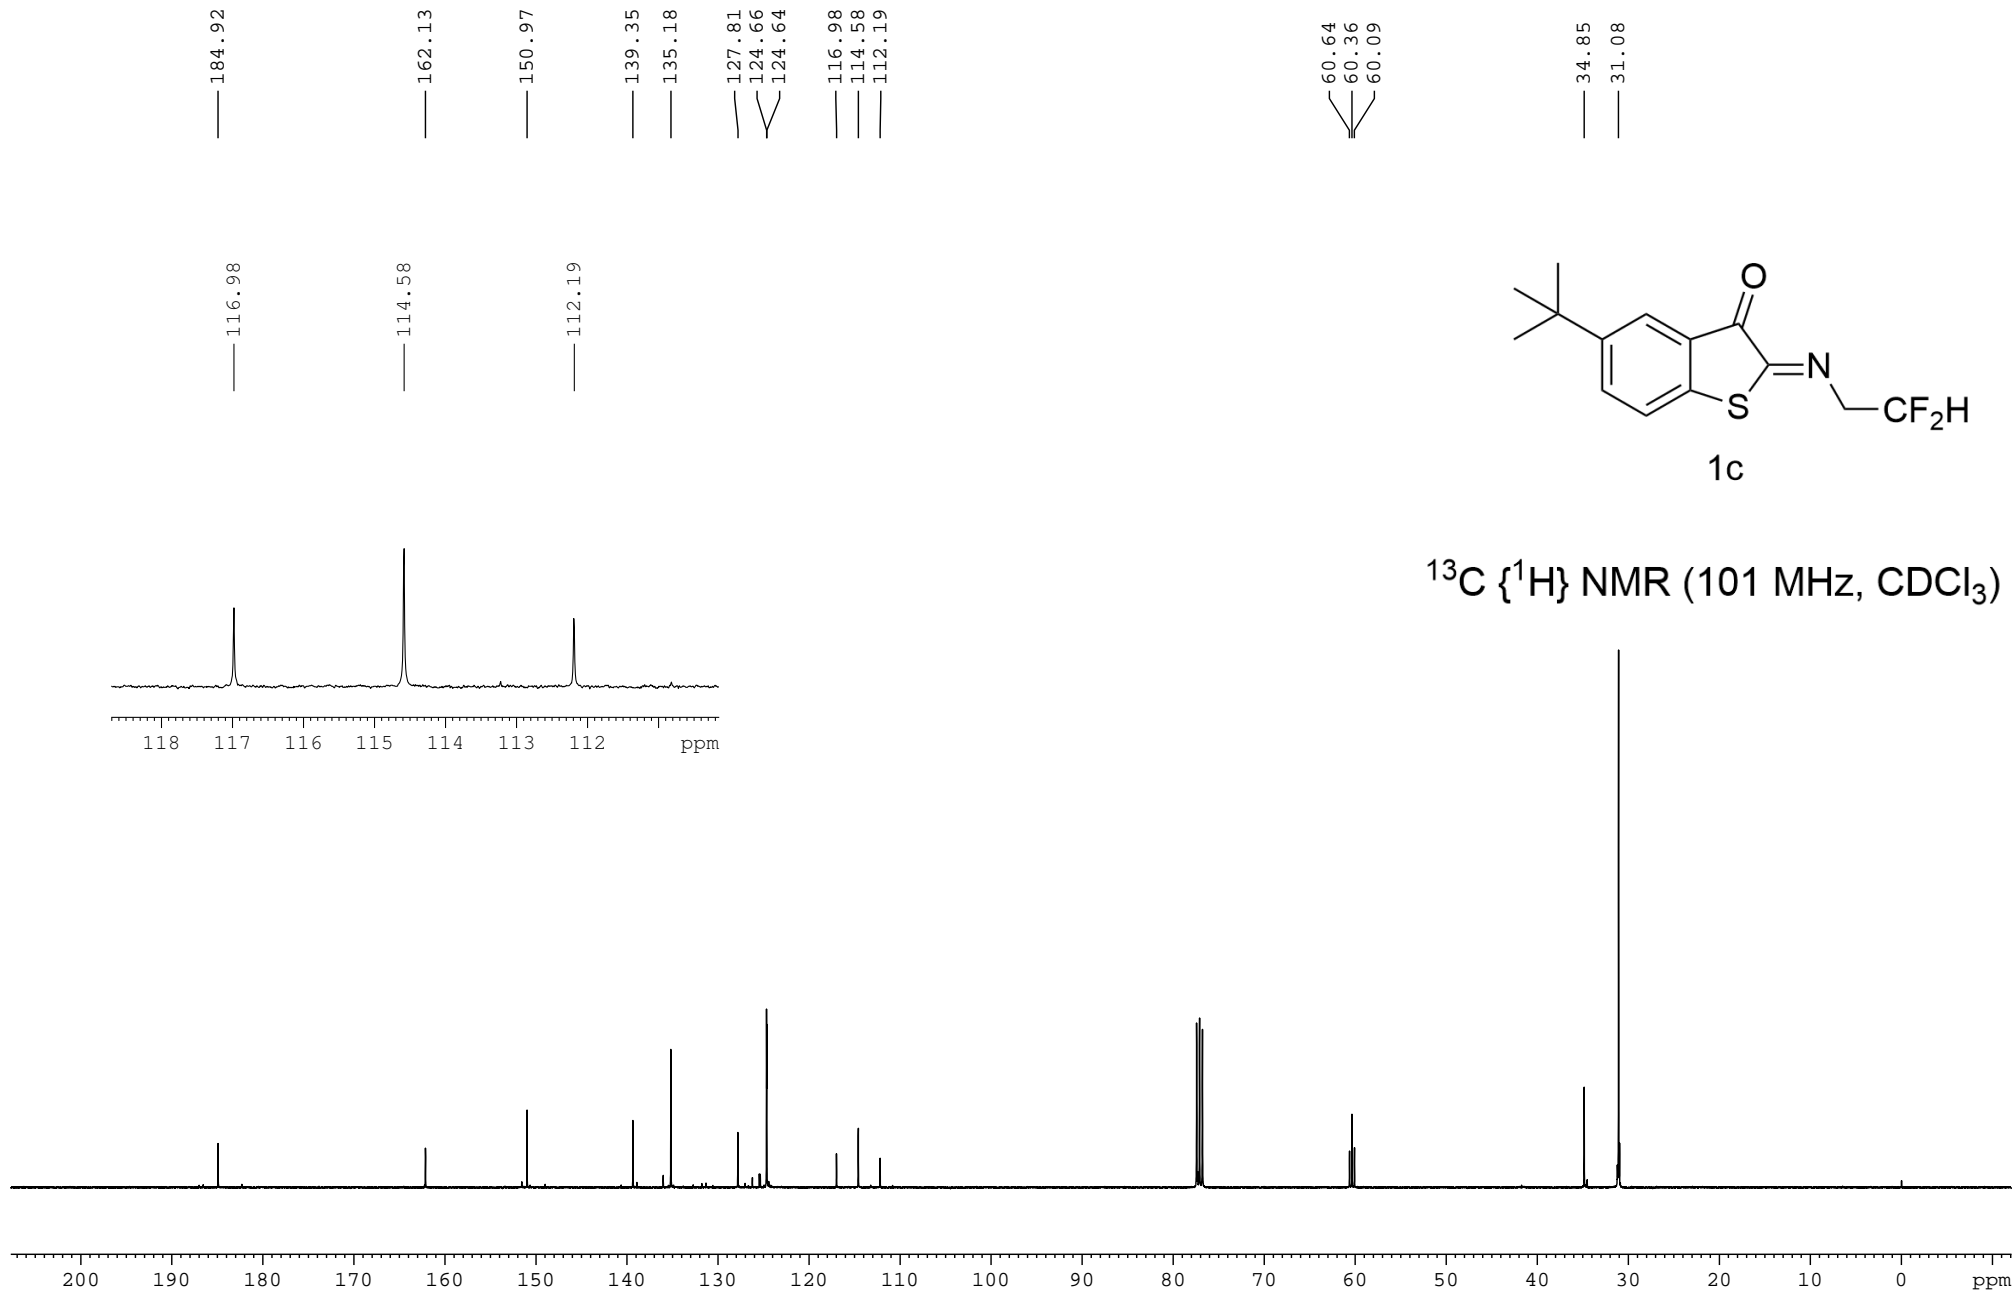

-120.484

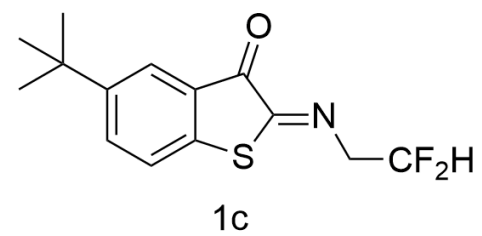

$^{19}\text{F}$  NMR (376 MHz,  $\text{CDCl}_3$ )

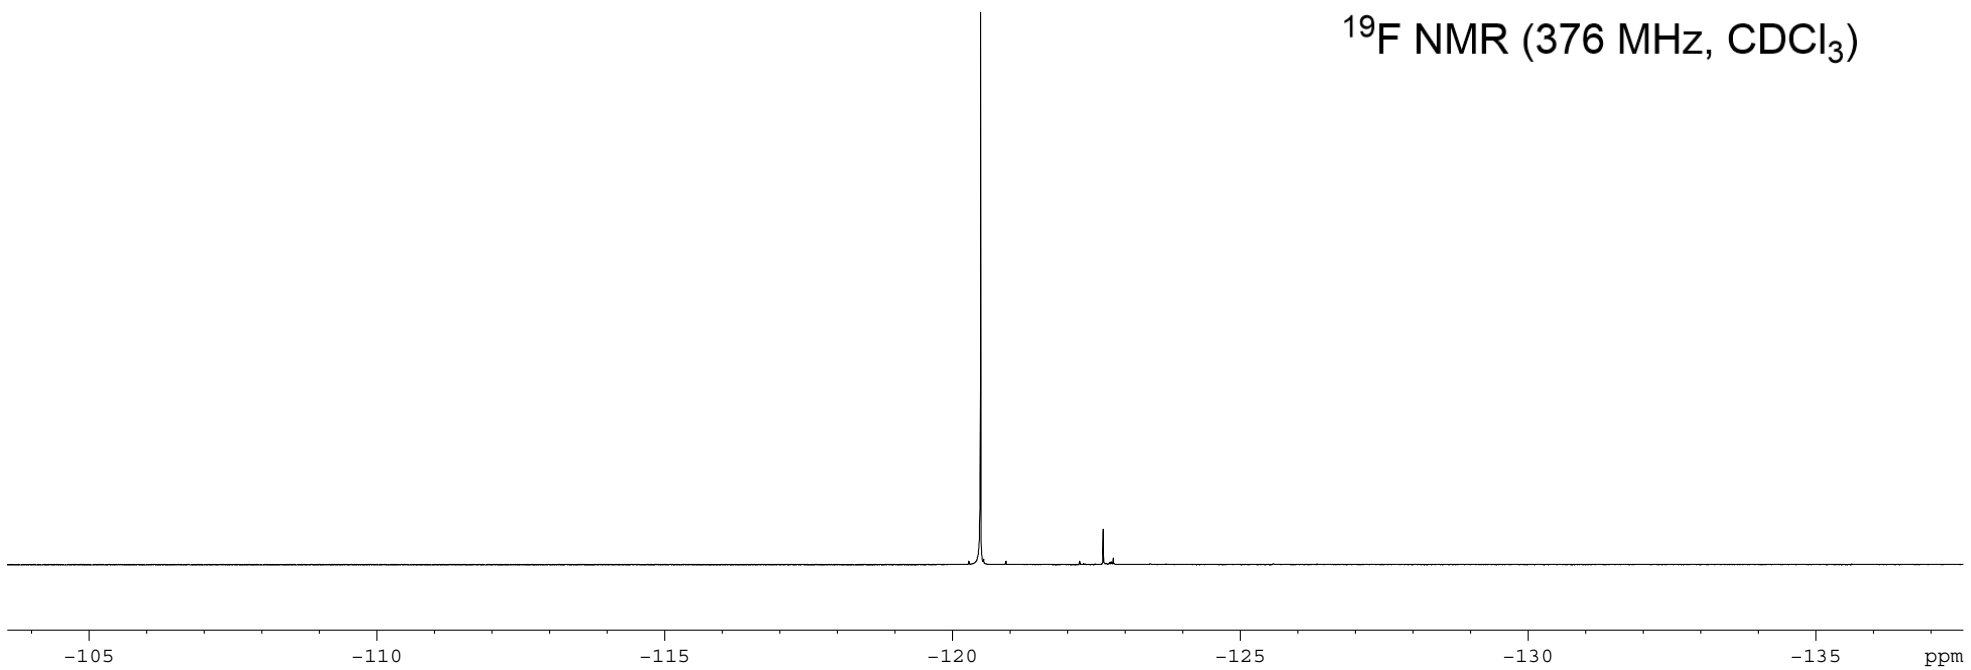

7.973  
7.959  
7.952  
7.938  
7.184  
7.179  
7.164  
7.159  
7.082  
7.077  
7.061  
7.056  
7.040  
7.034  
6.481  
6.470  
6.459  
6.342  
6.331  
6.320  
6.204  
6.192  
6.181

3.987  
3.976  
3.952  
3.941  
3.916  
3.905

0.000

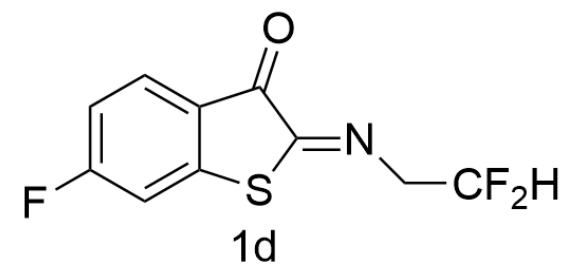

<sup>1</sup>H NMR (400 MHz, CDCl<sub>3</sub>)

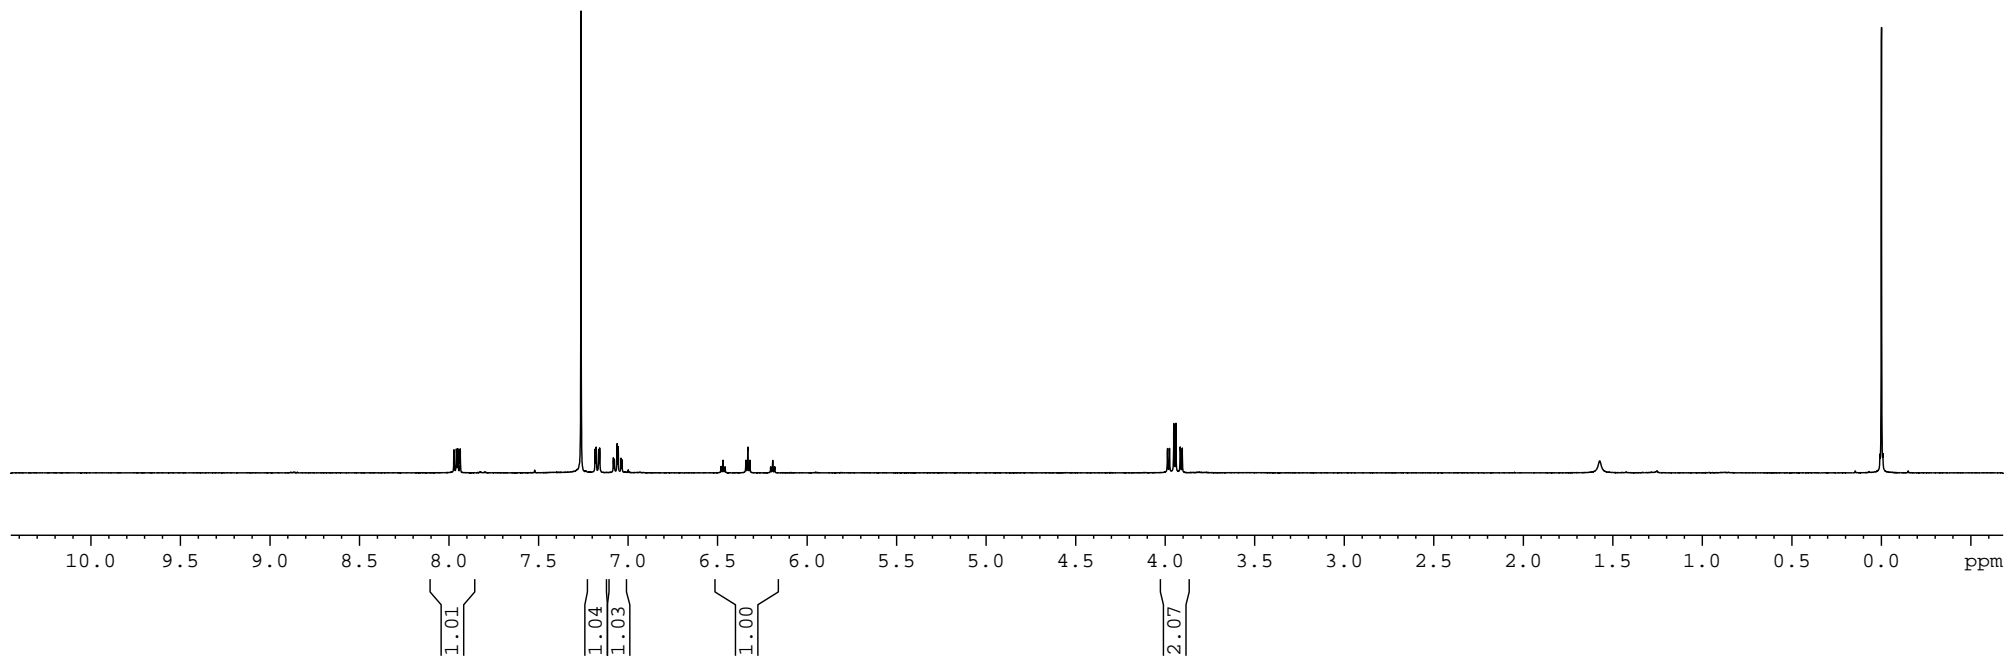

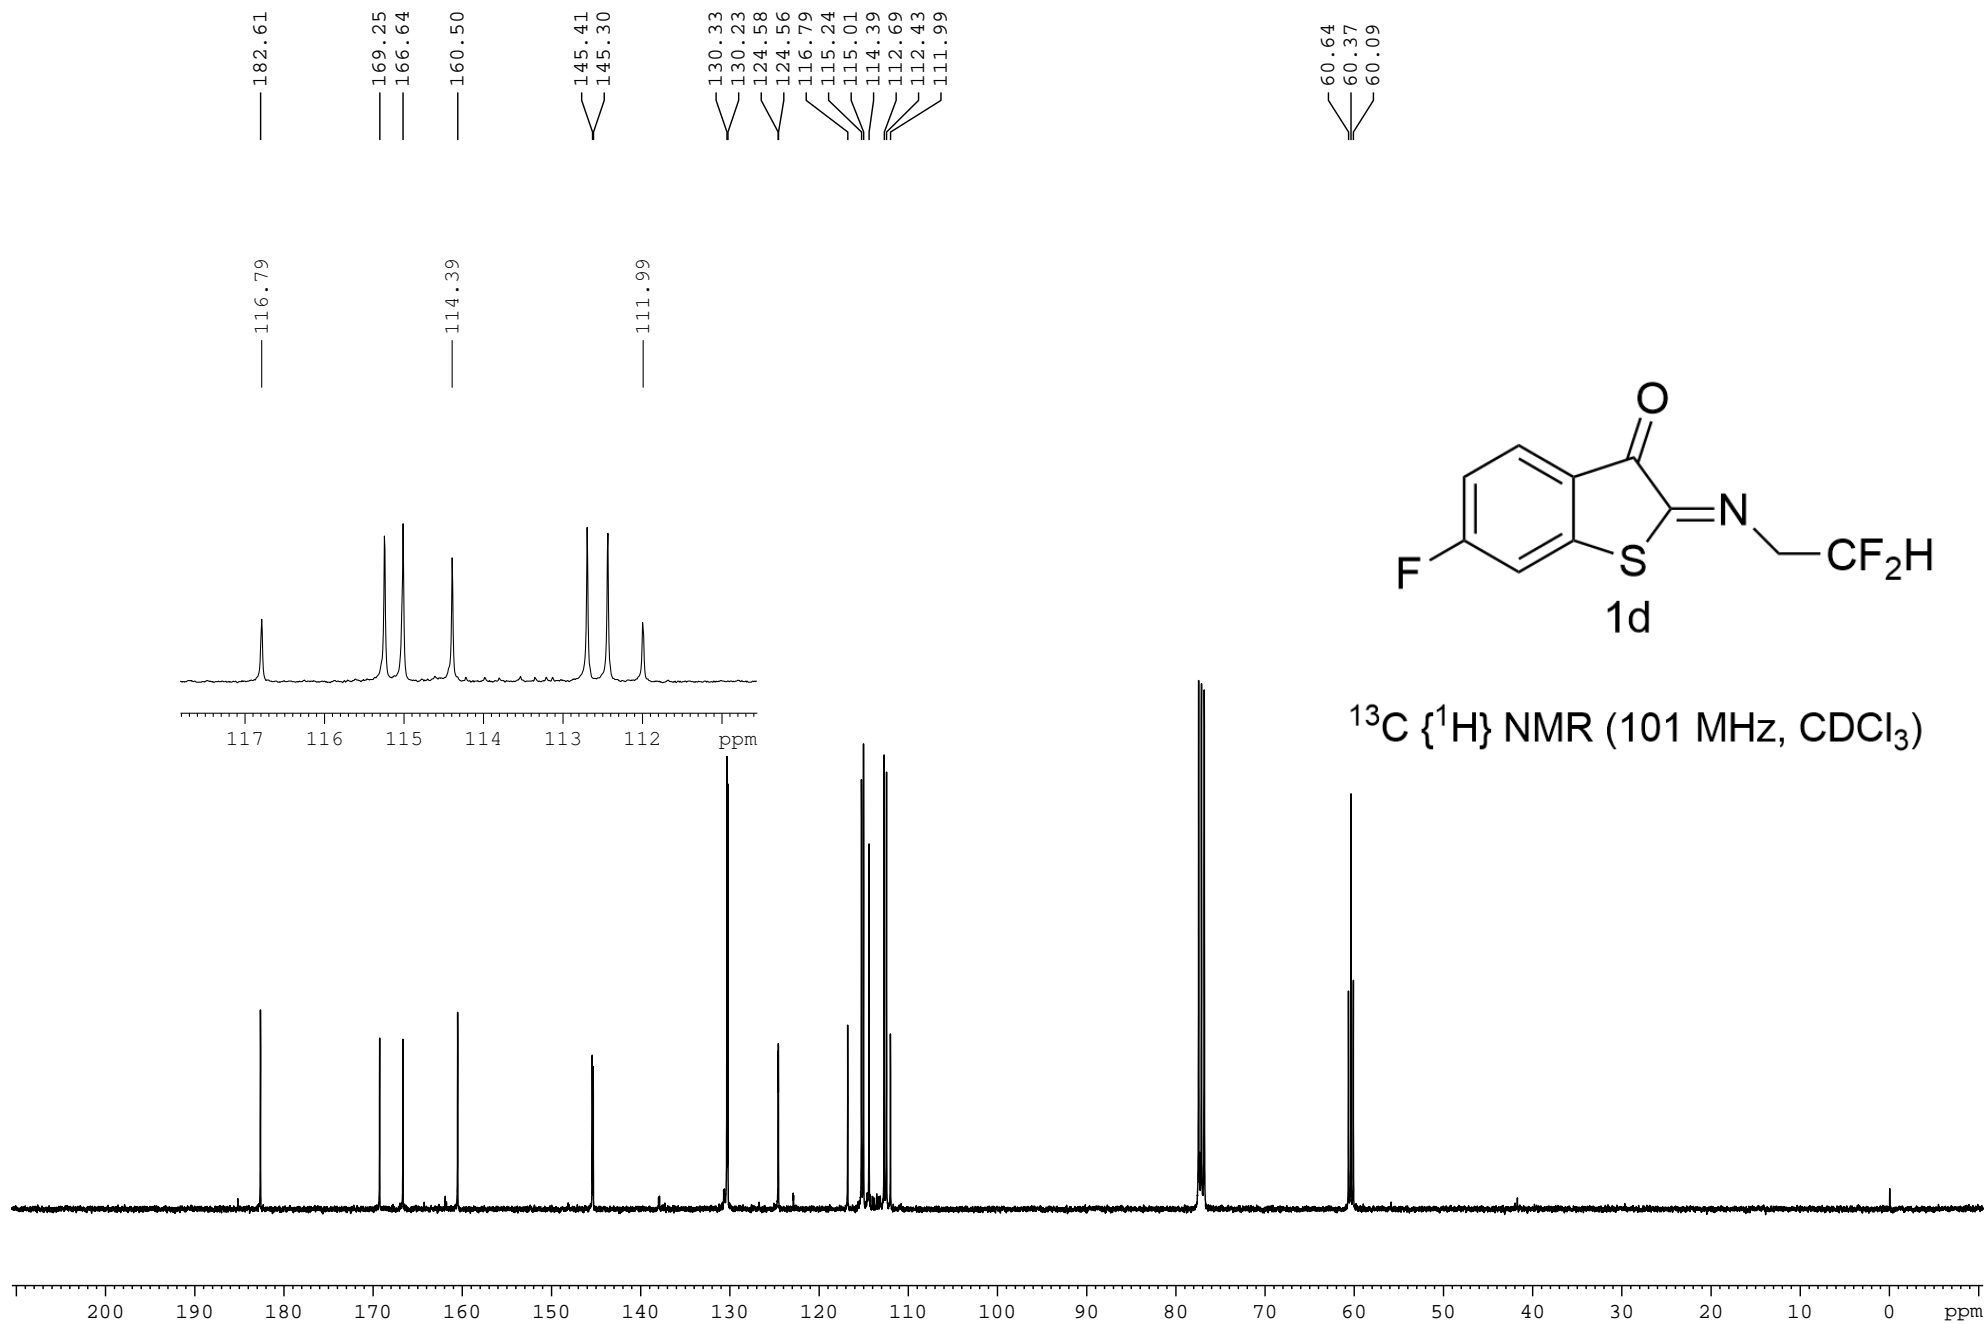

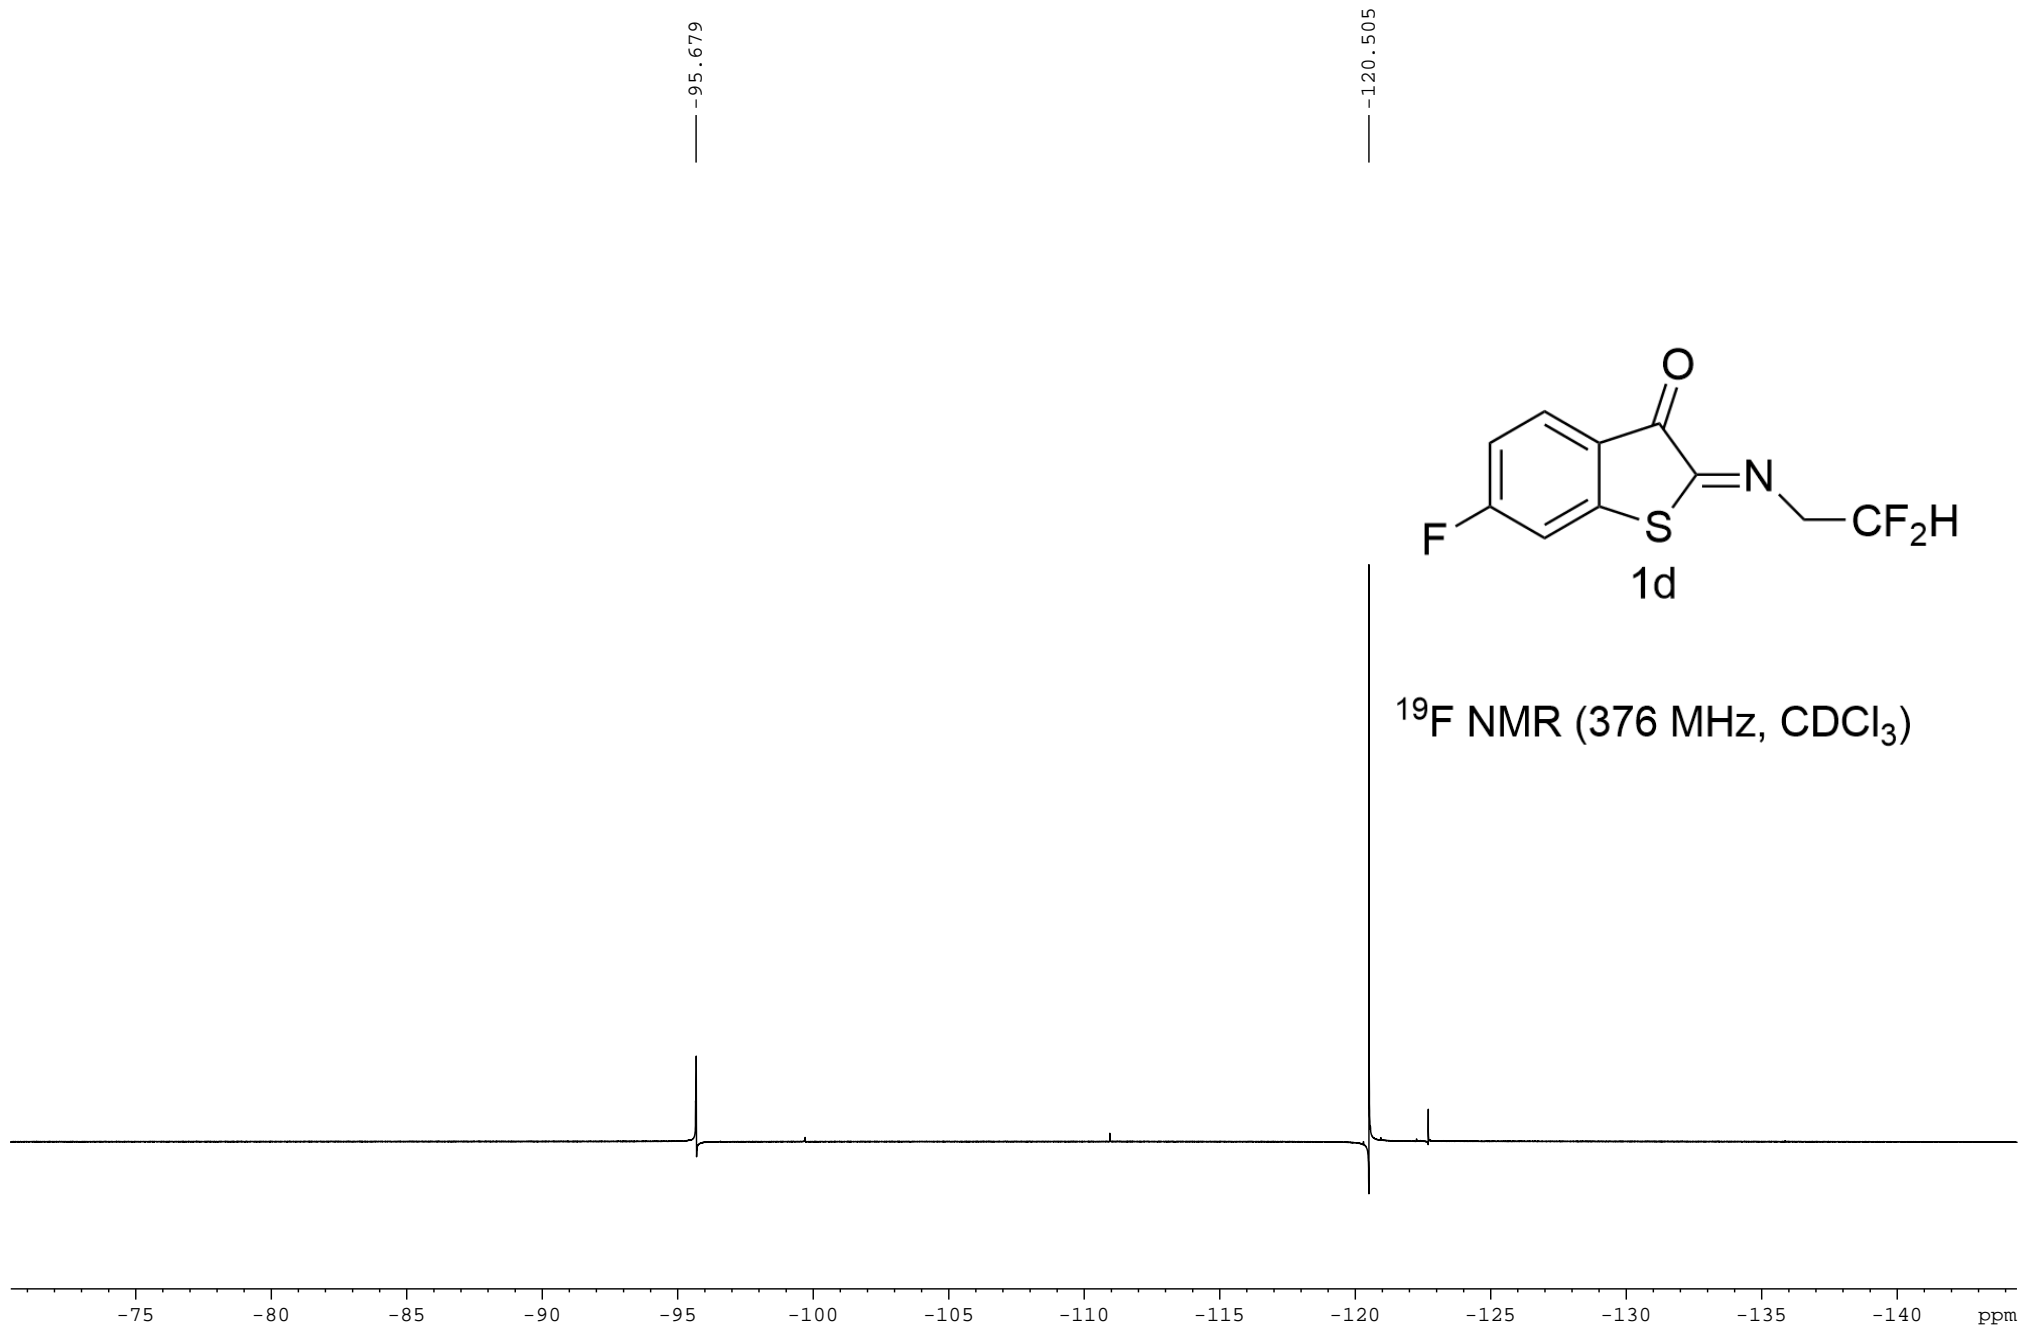

7.568  
7.548  
7.529  
7.367  
7.348  
7.333  
7.313  
7.275  
6.479  
6.468  
6.457  
6.340  
6.329  
6.318  
6.201  
6.190  
6.179

3.975  
3.964  
3.940  
3.929  
3.904  
3.893

— -0.000

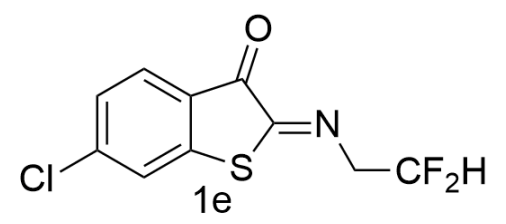

<sup>1</sup>H NMR (400 MHz, CDCl<sub>3</sub>)

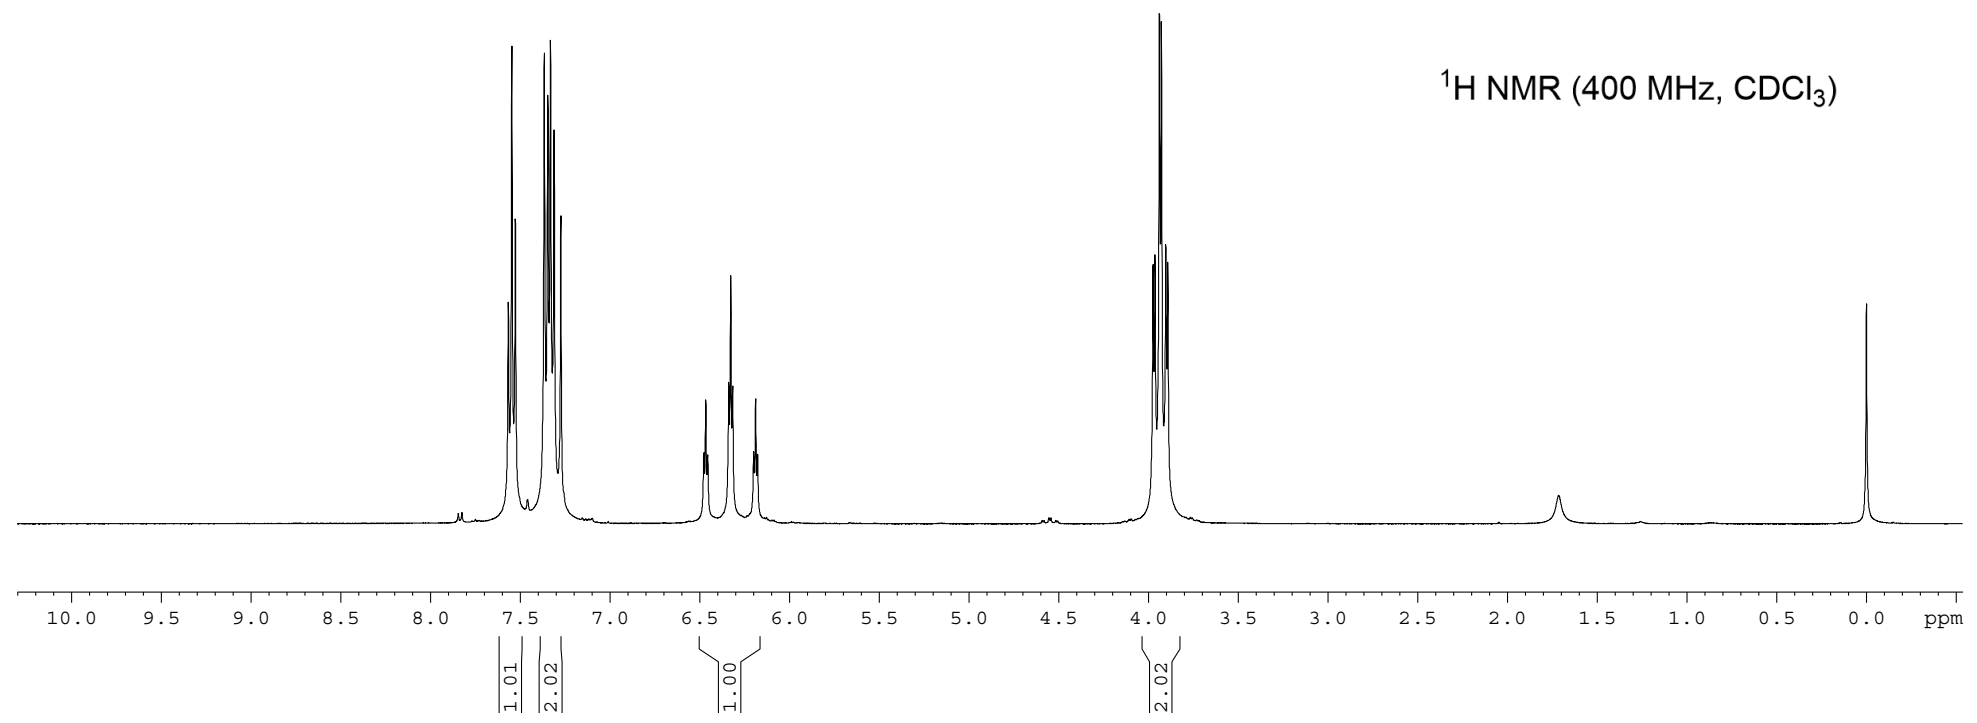



181.47  
160.29  
144.72  
136.93  
136.77  
129.37  
124.04  
123.49  
116.87  
114.47  
112.07

60.66  
60.39  
60.12

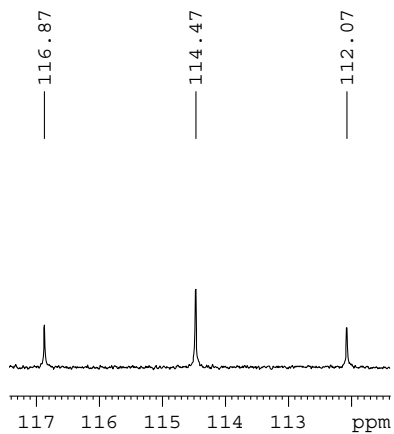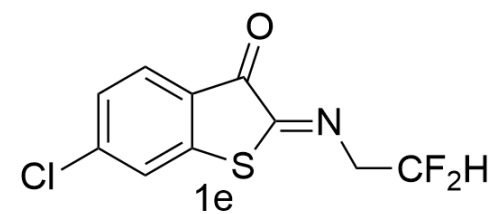

$^{13}\text{C} \{^1\text{H}\}$  NMR (101 MHz,  $\text{CDCl}_3$ )

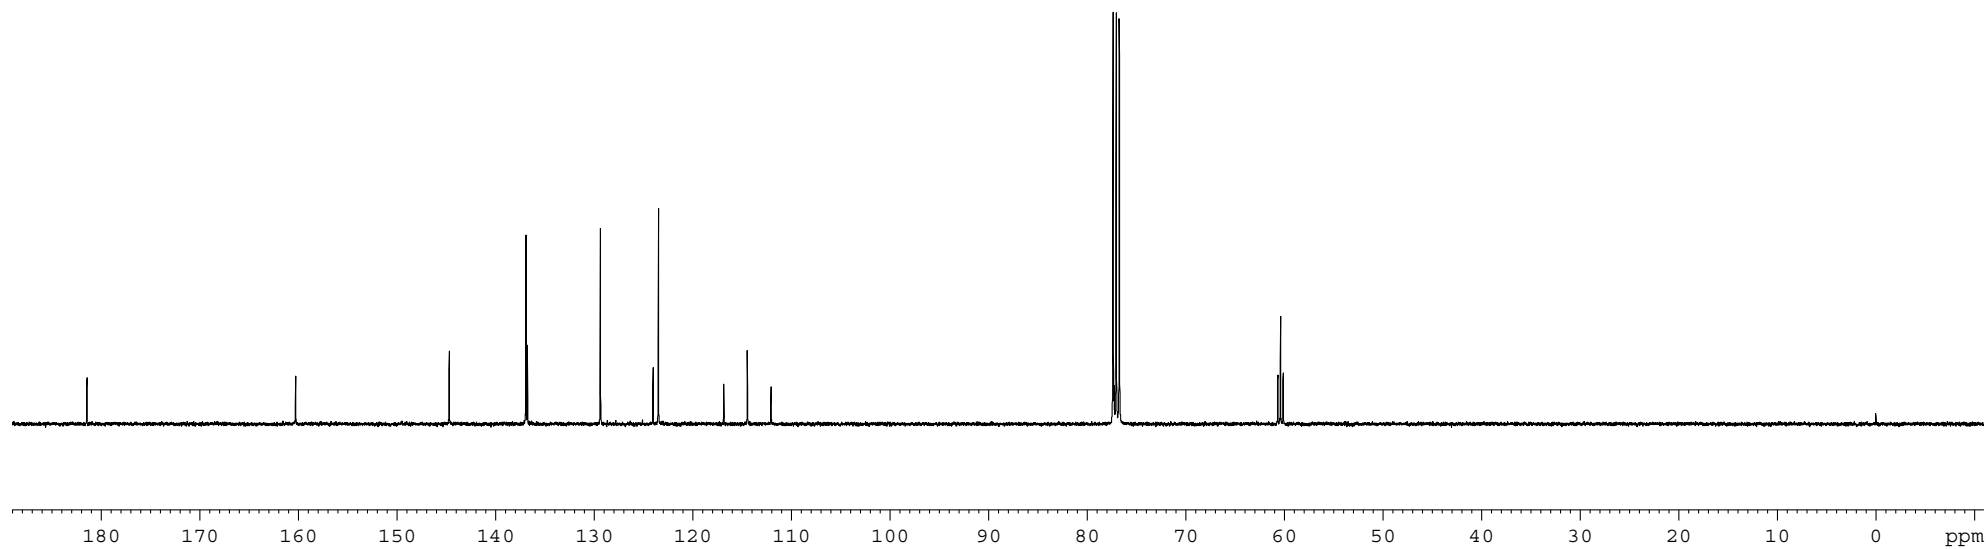

-120.493

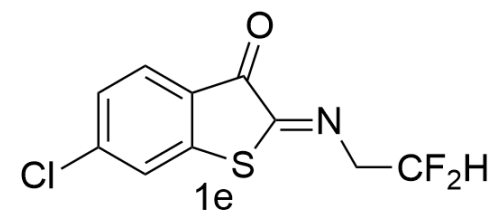

$^{19}\text{F}$  NMR (376 MHz,  $\text{CDCl}_3$ )

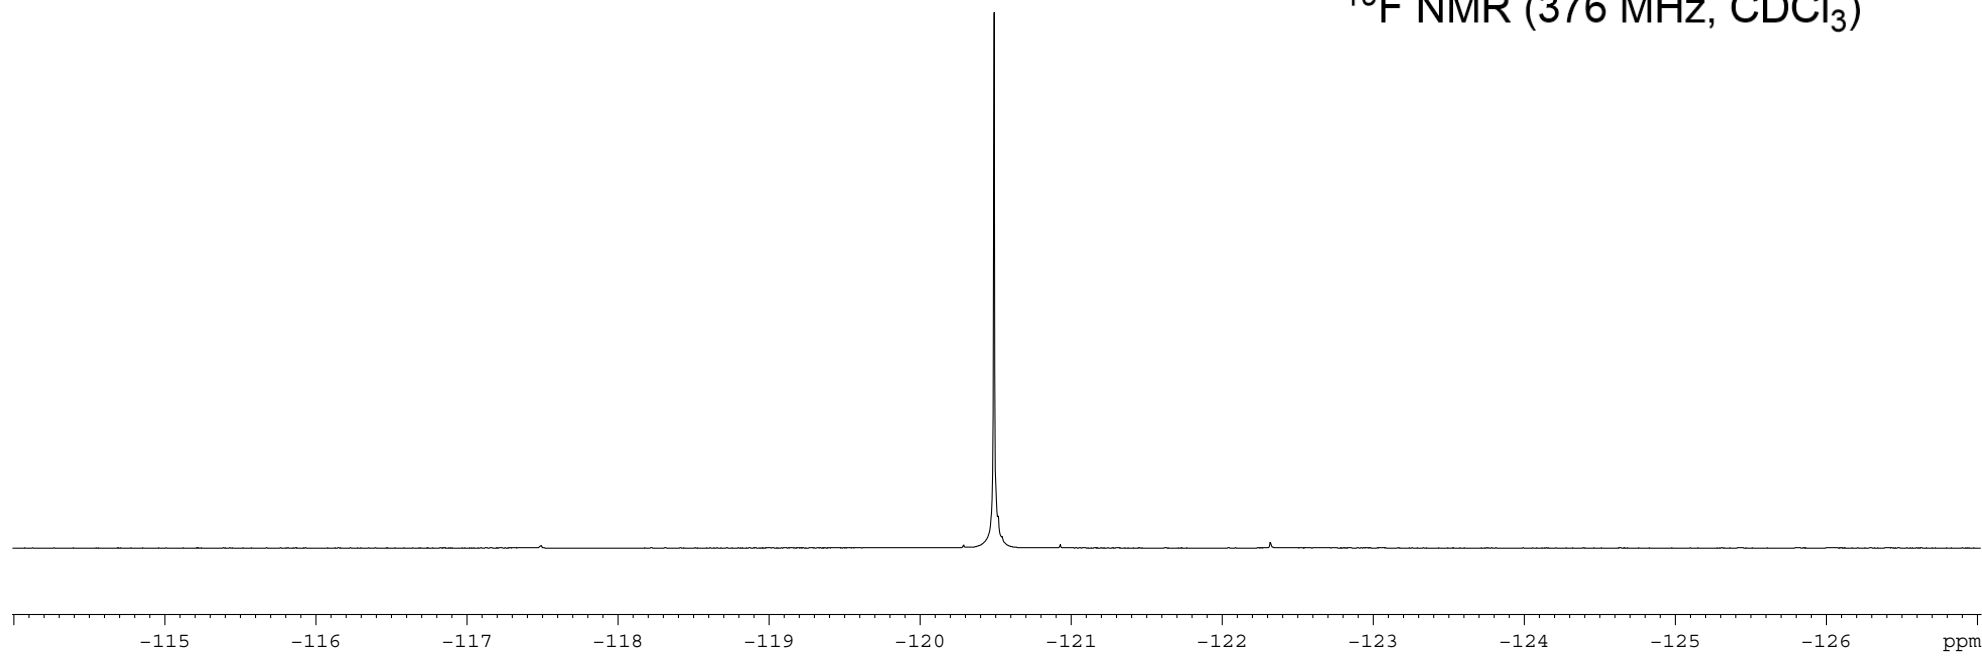

7.554  
7.552  
7.535  
7.533  
7.478  
7.458  
7.439  
7.418  
7.415  
7.399  
7.396

6.478  
6.467  
6.456  
6.339  
6.328  
6.317  
6.200  
6.189  
6.178

3.978  
3.967  
3.943  
3.932  
3.907  
3.896

0.000  
-0.000

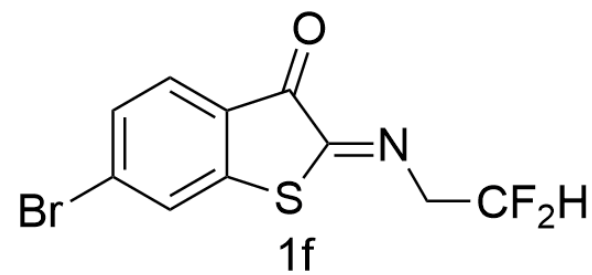

<sup>1</sup>H NMR (400 MHz, CDCl<sub>3</sub>)

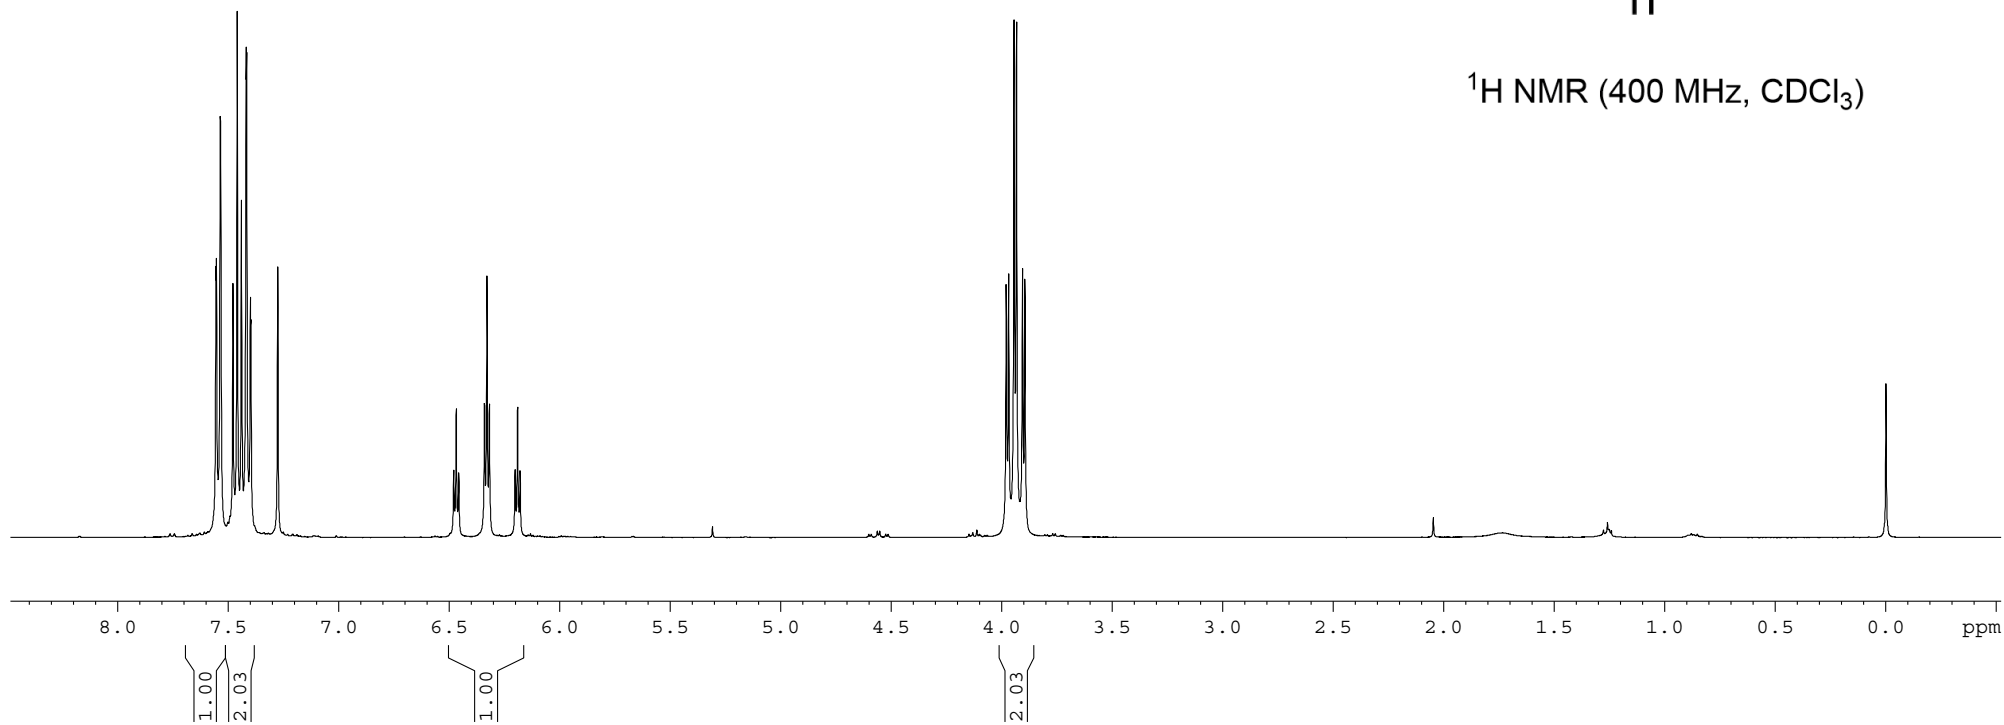

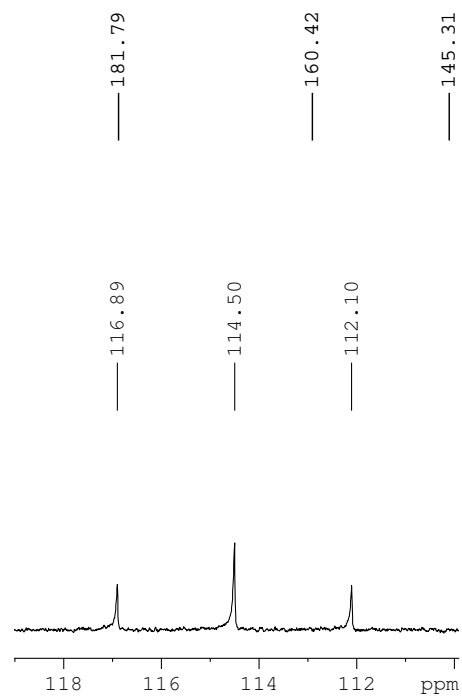

181.79

160.42

145.31

136.94

132.74

125.15

124.63

124.13

116.89

114.50

112.10

60.60  
60.32  
60.05



$^{13}\text{C} \{^1\text{H}\}$  NMR (101 MHz,  $\text{CDCl}_3$ )

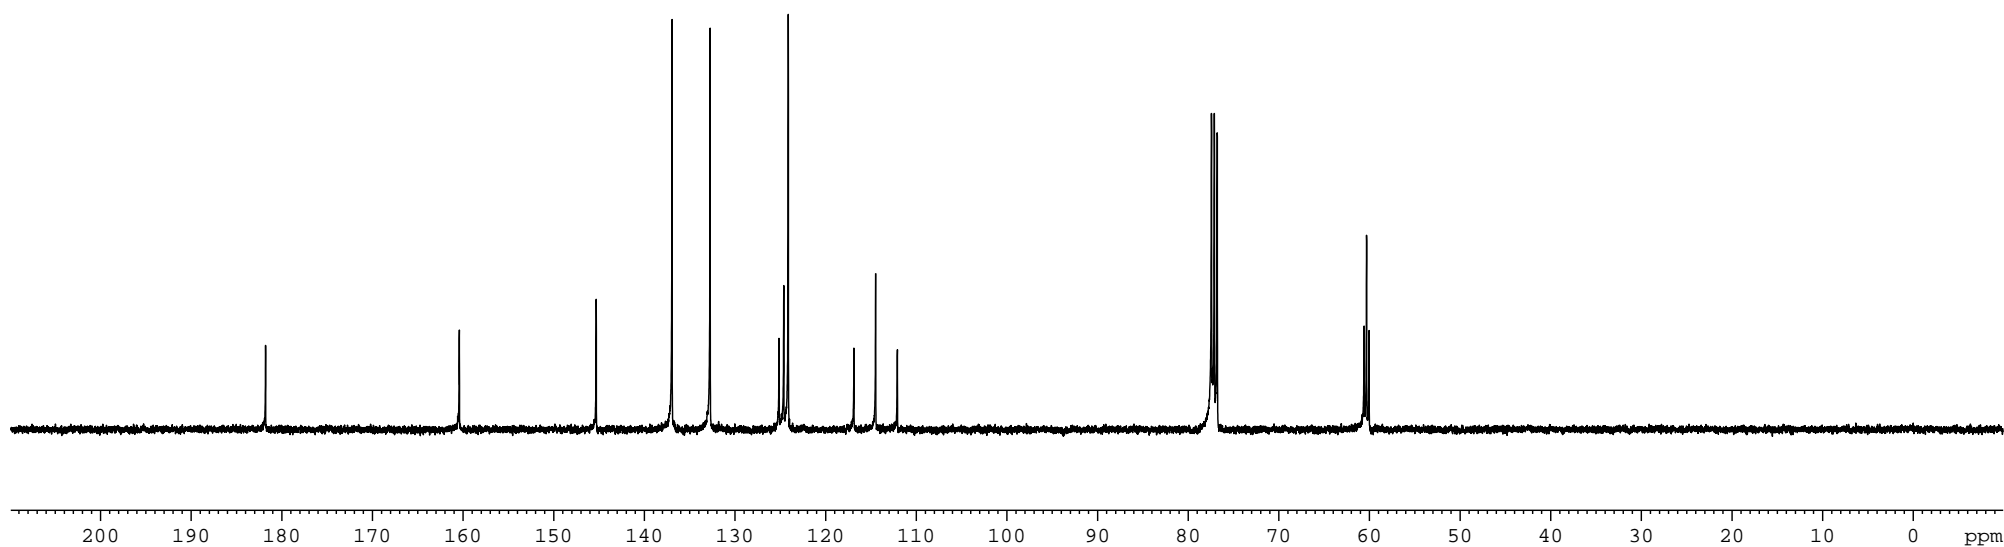

-120.50

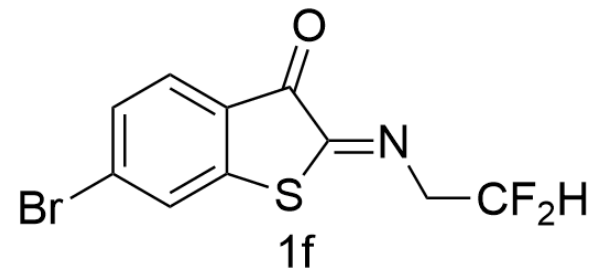

<sup>19</sup>F NMR (376 MHz, CDCl<sub>3</sub>)

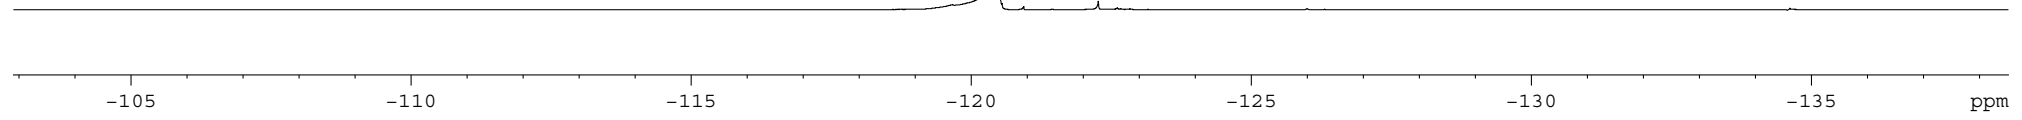

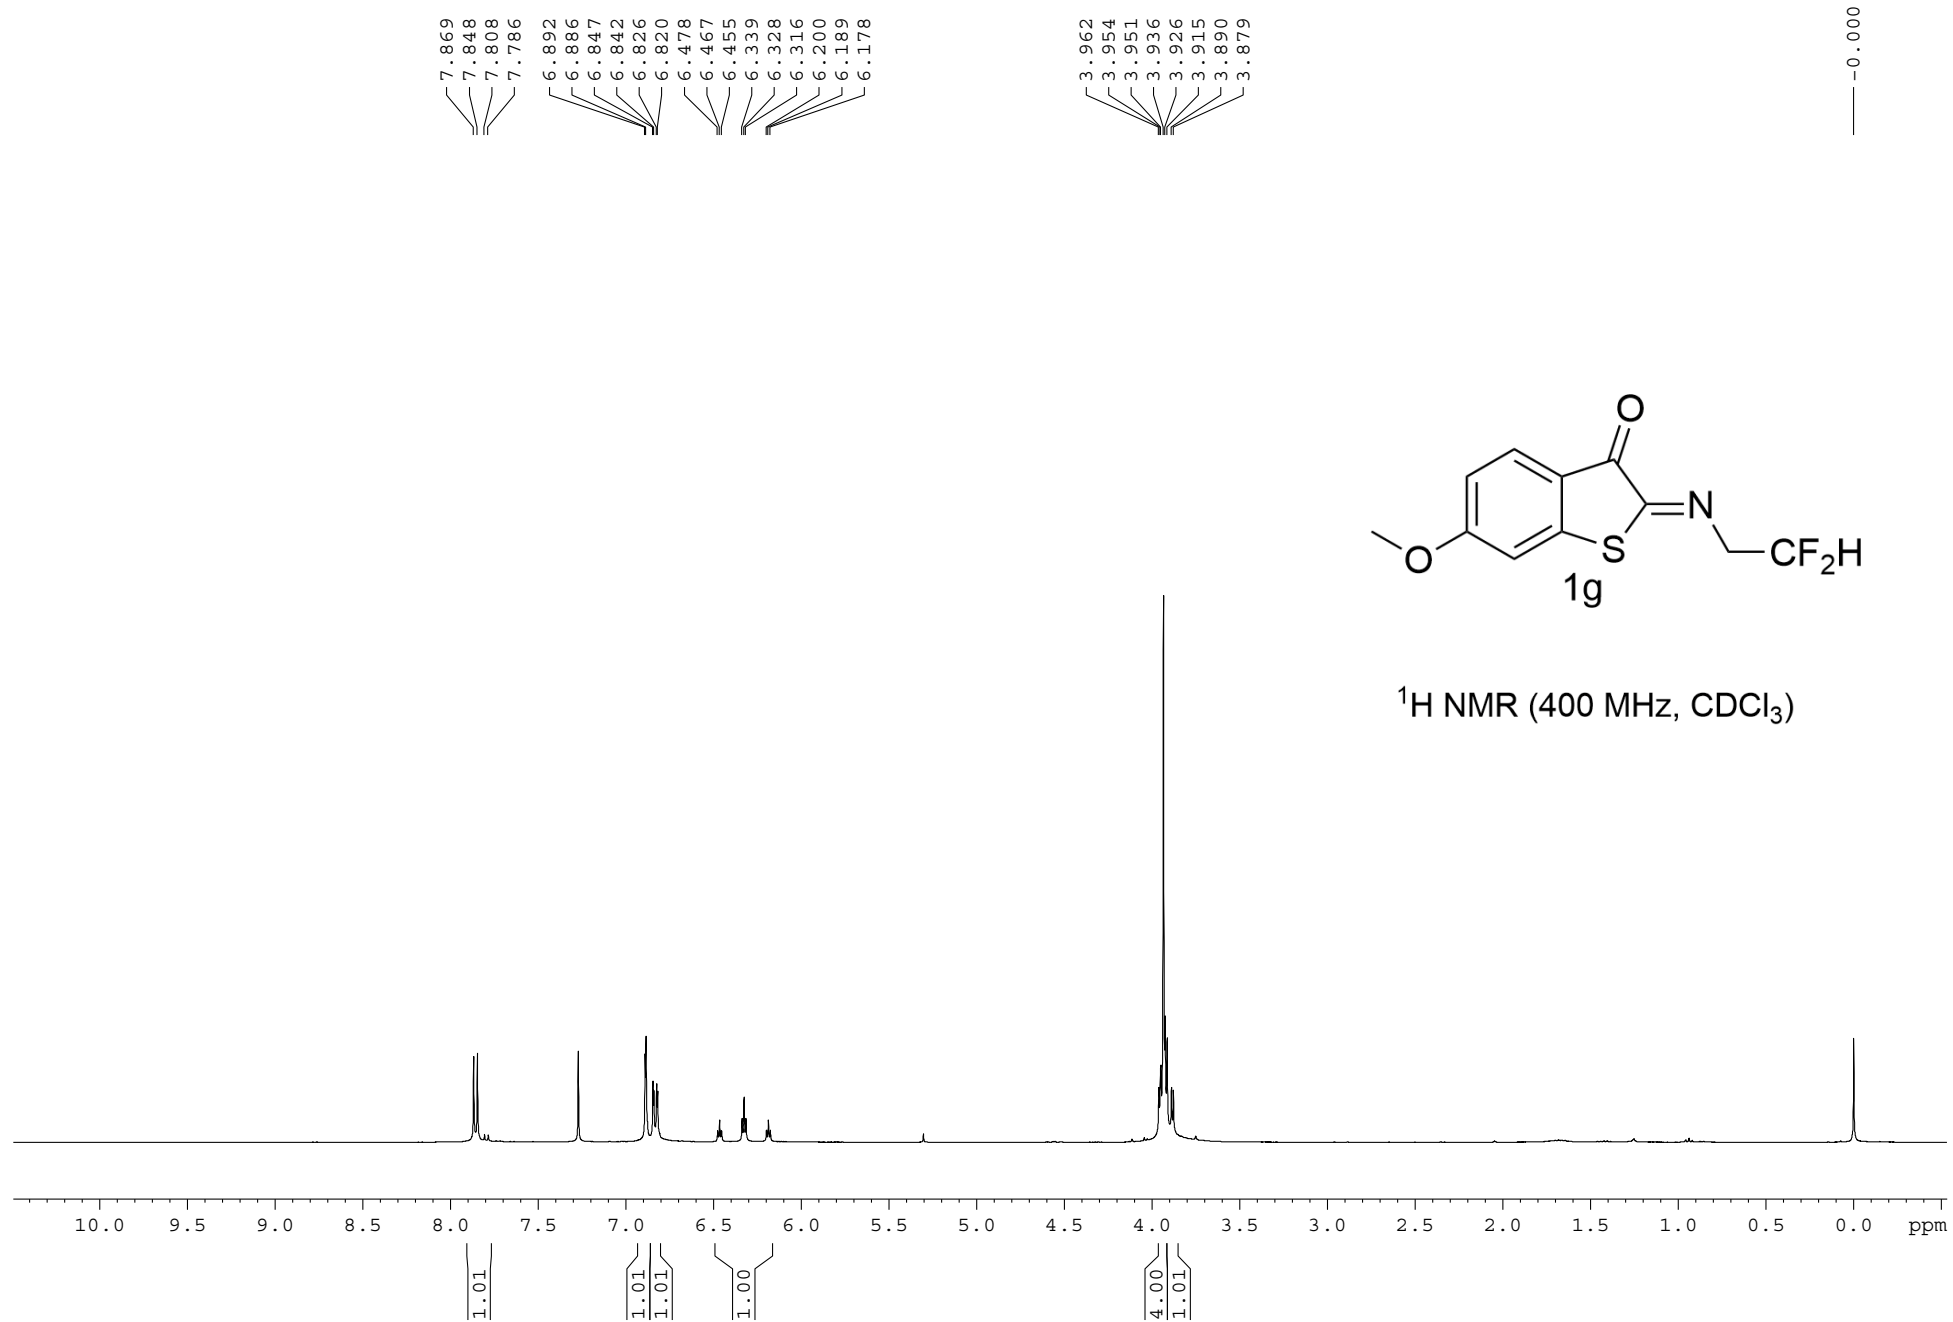

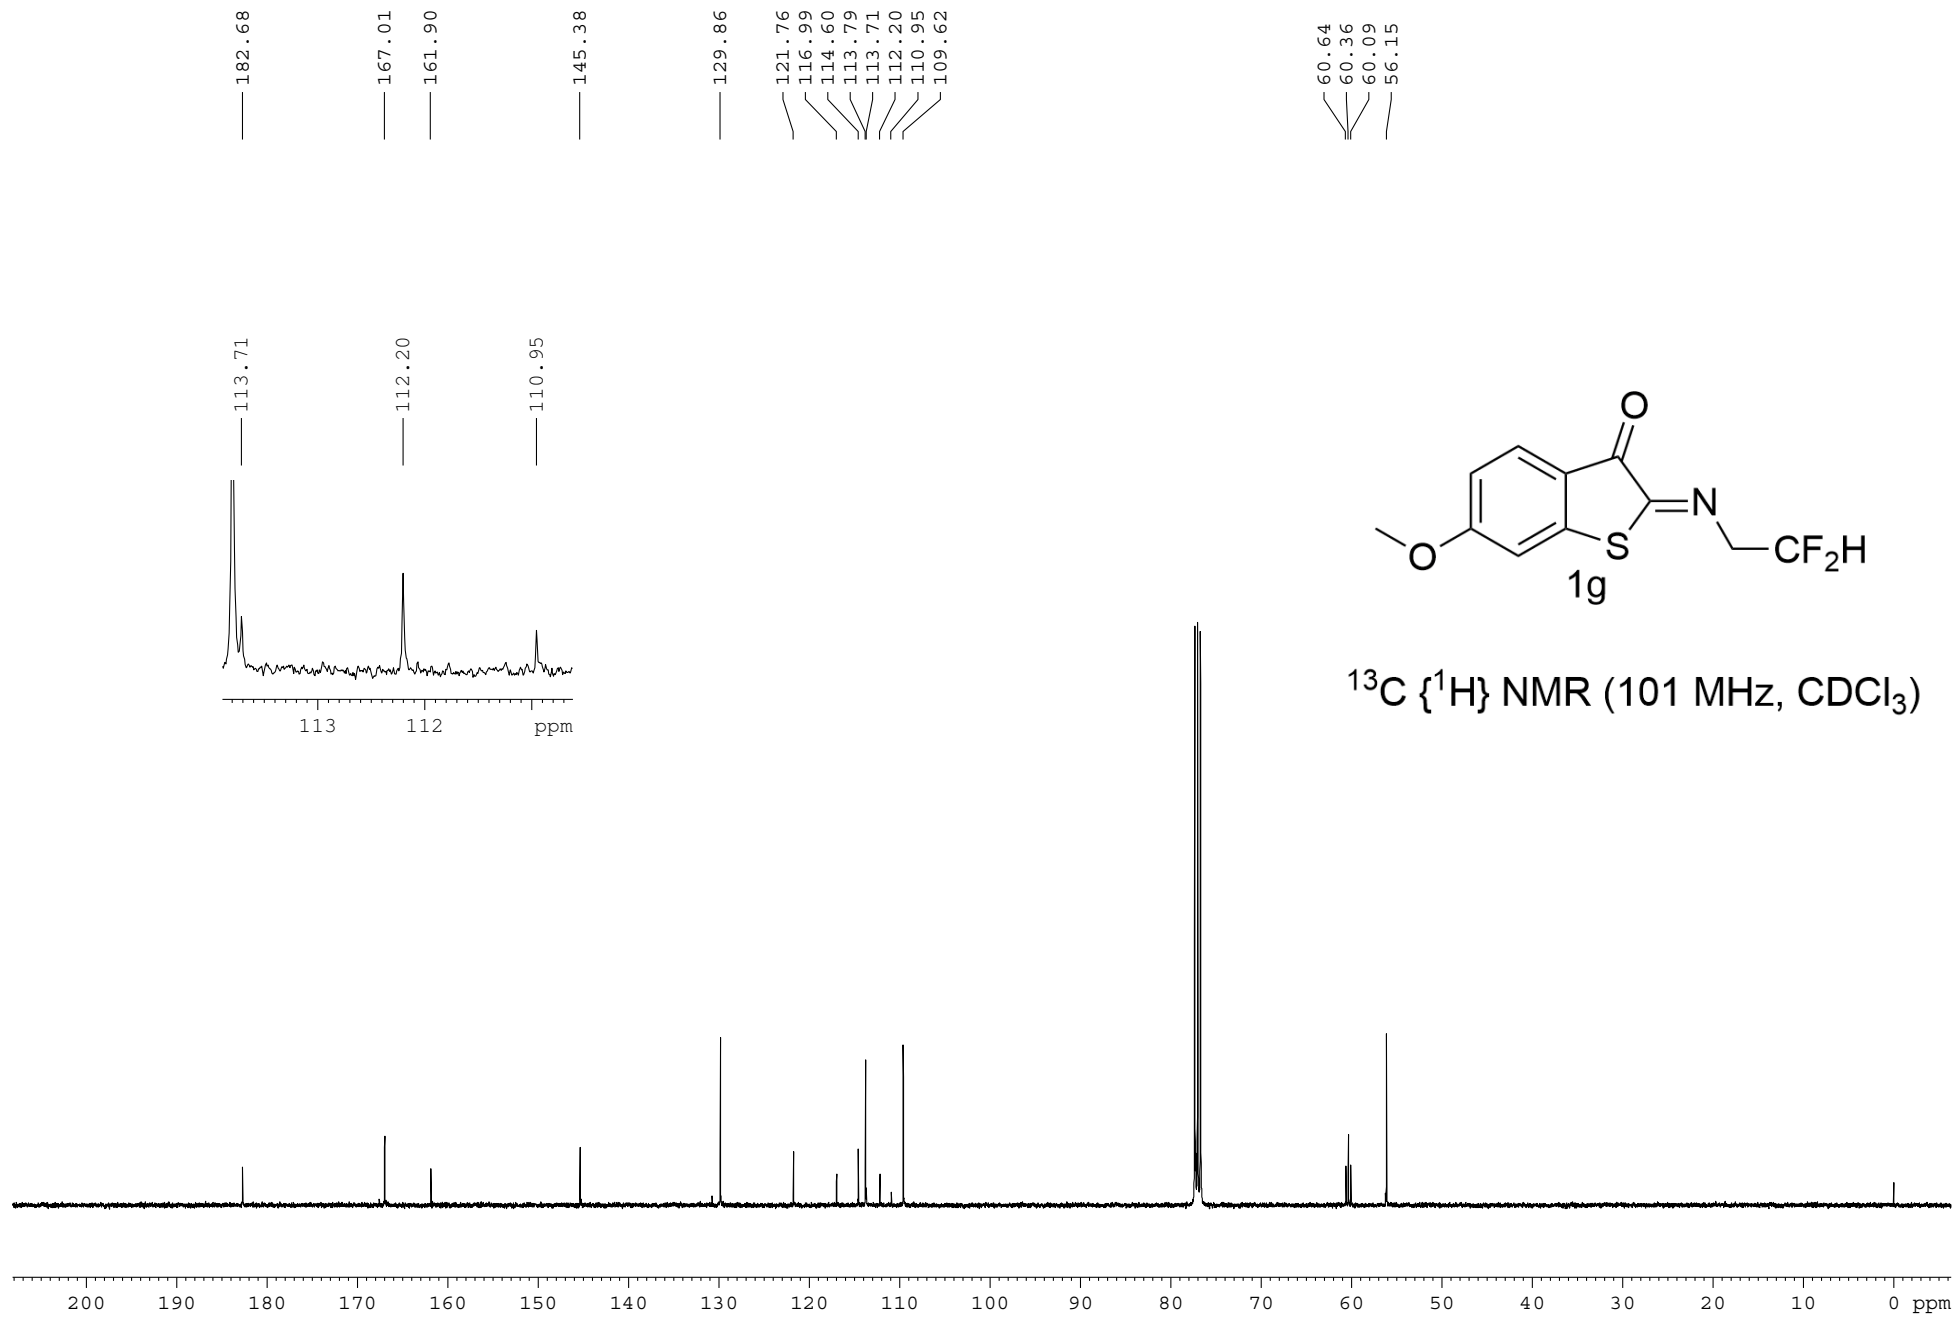

— -120.480

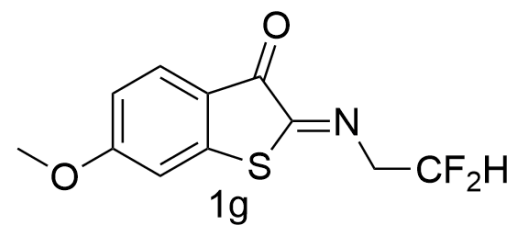

<sup>19</sup>F NMR (376 MHz, CDCl<sub>3</sub>)

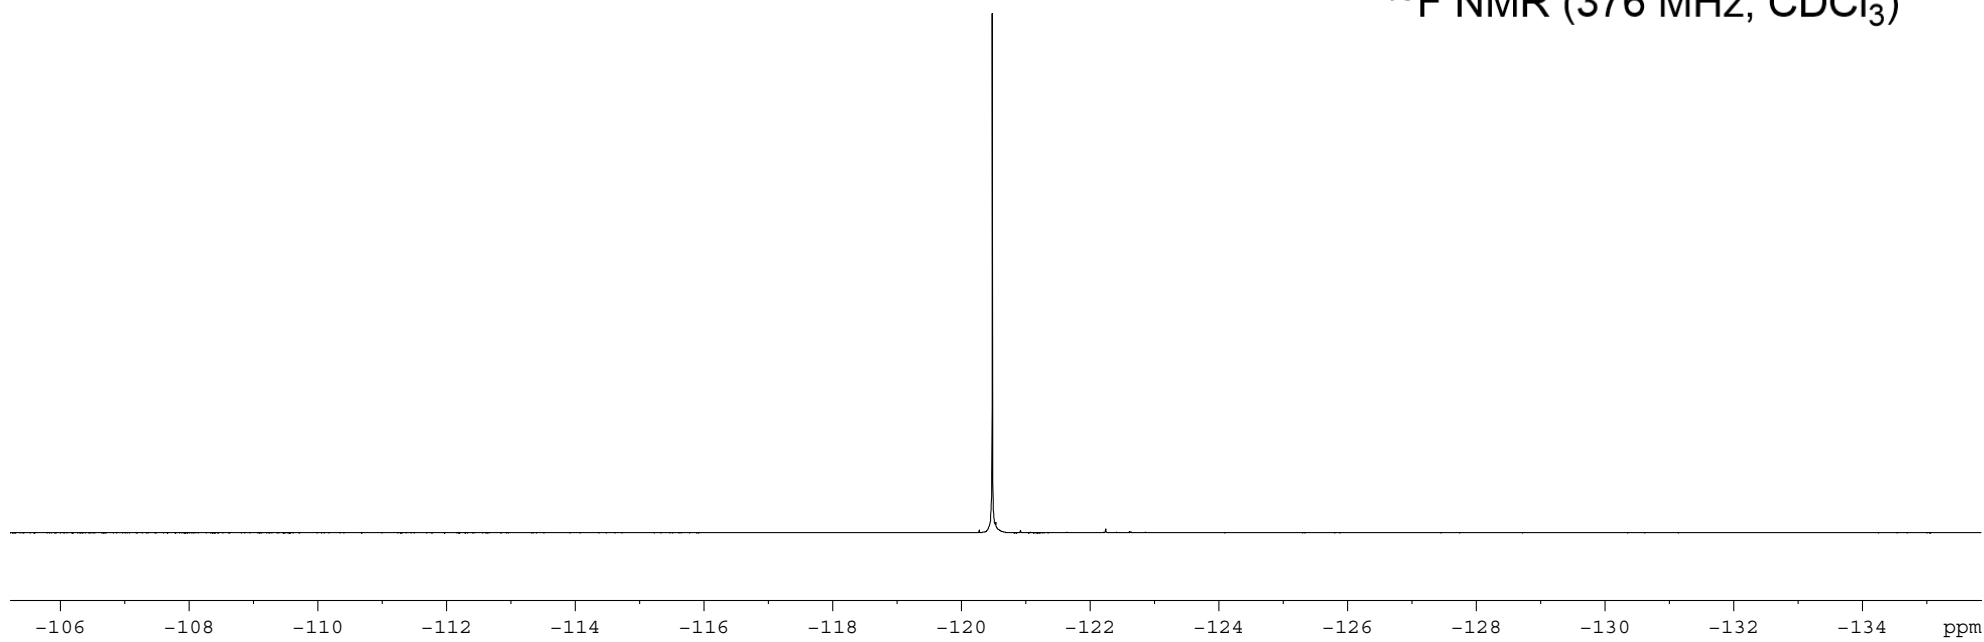



7.776  
7.757  
7.499  
7.480  
7.300  
7.281

6.495  
6.484  
6.472  
6.356  
6.345  
6.333  
6.217  
6.206  
6.194

4.016  
4.005  
3.981  
3.970  
3.945  
3.934

2.359

-0.000

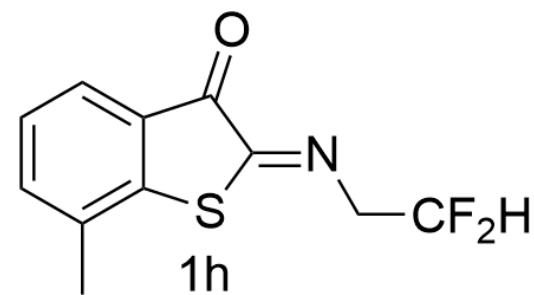

<sup>1</sup>H NMR (400 MHz, CDCl<sub>3</sub>)

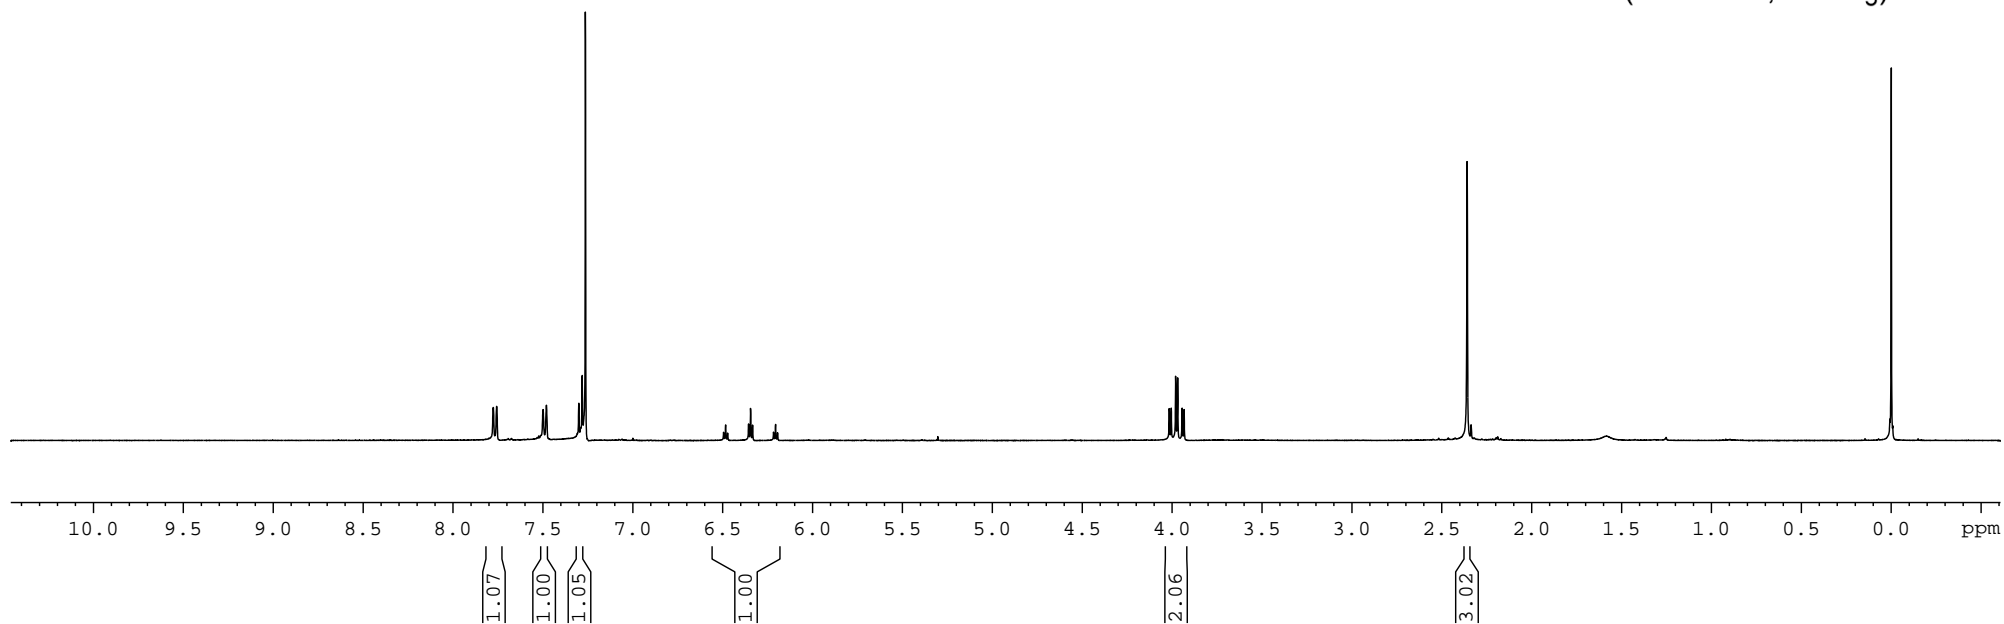

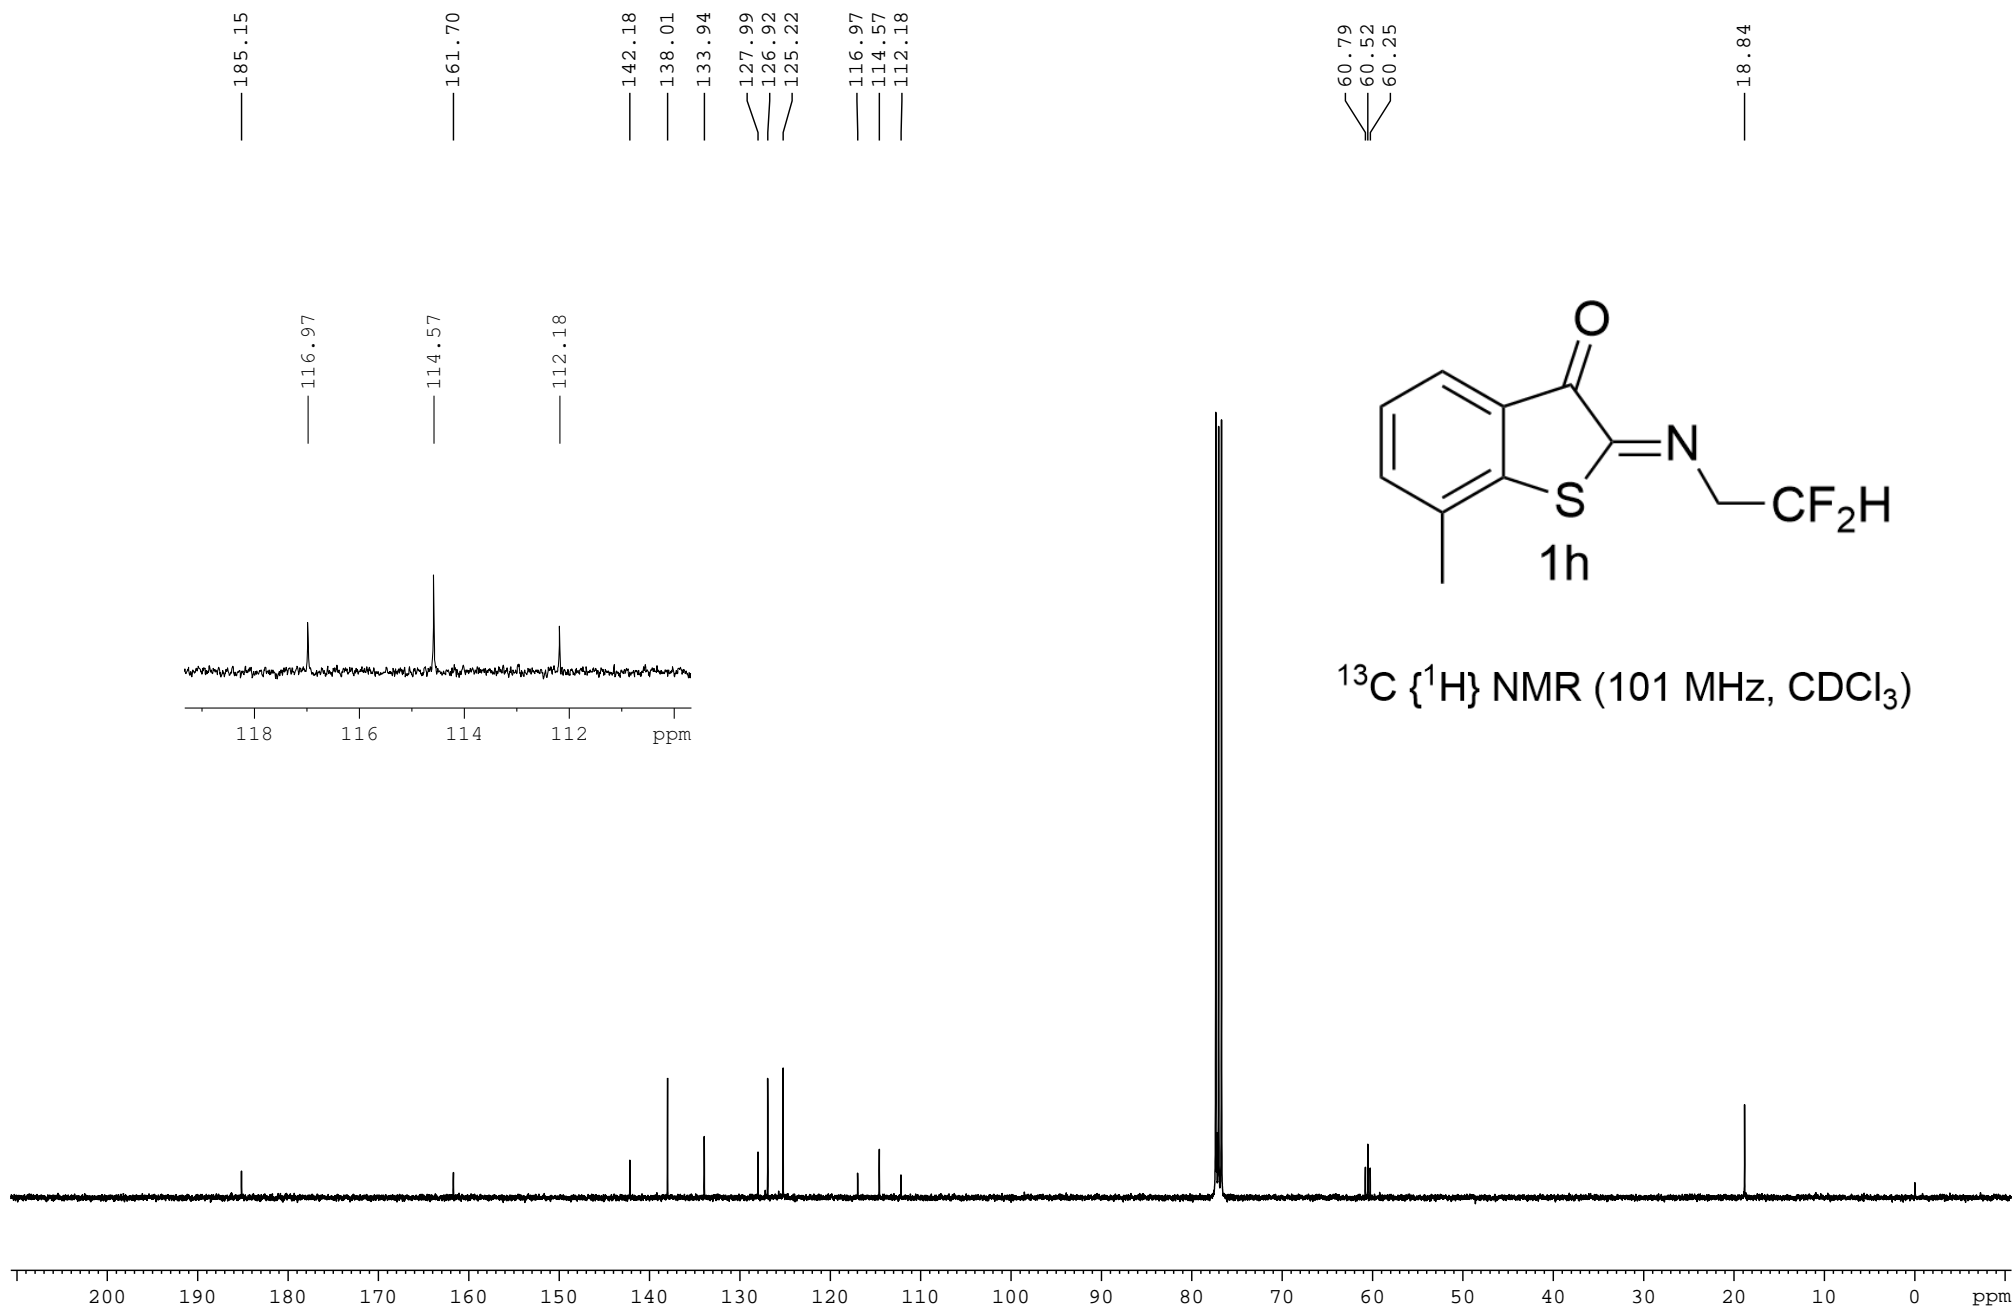

-120.475

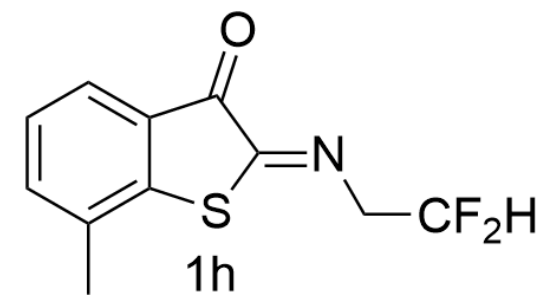

$^{19}\text{F}$  NMR (376 MHz,  $\text{CDCl}_3$ )

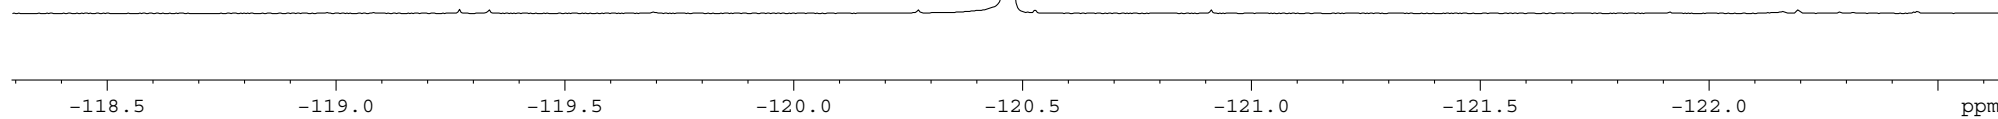

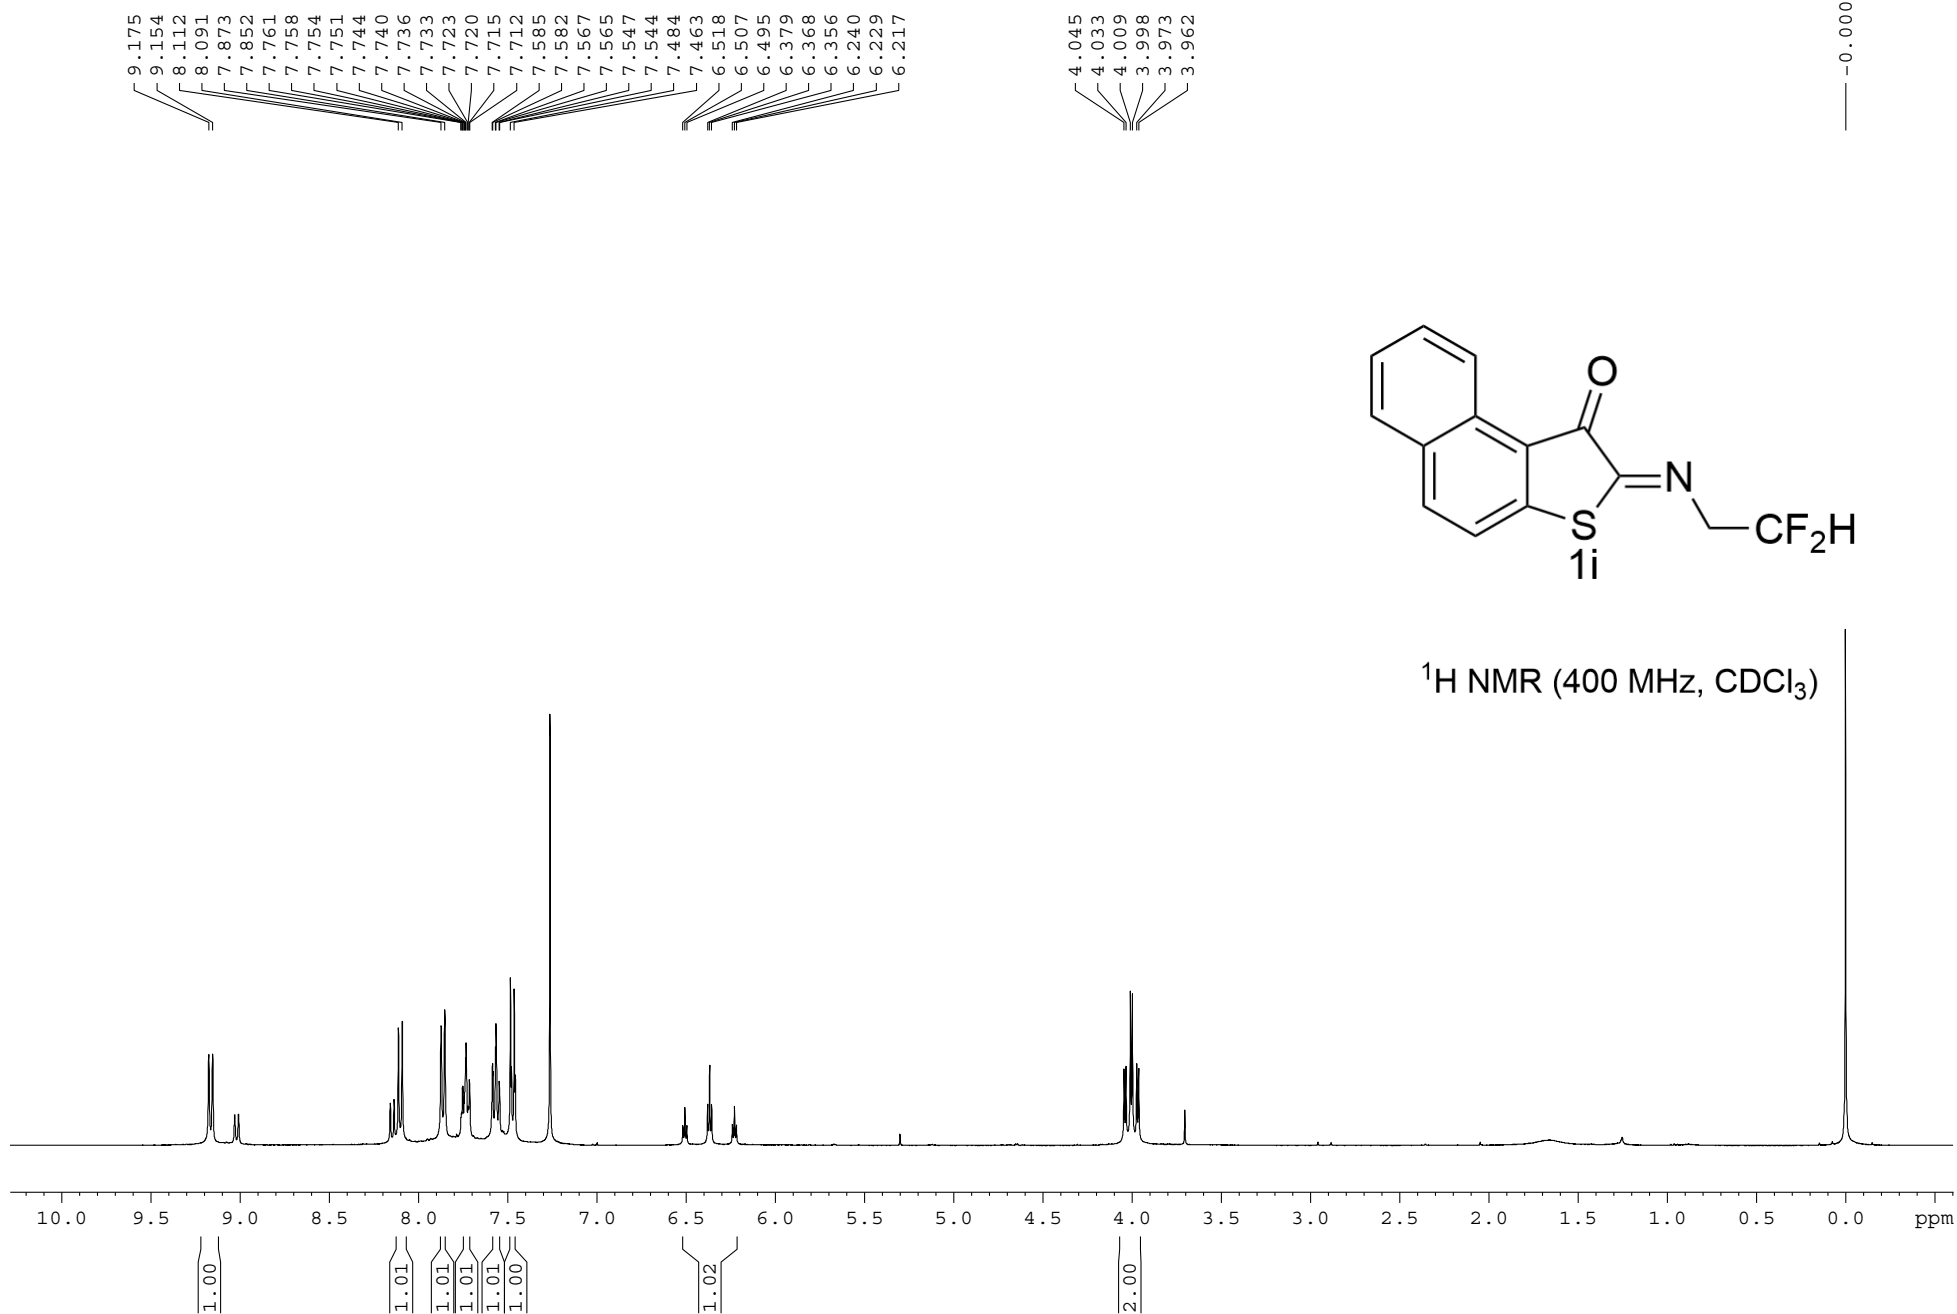

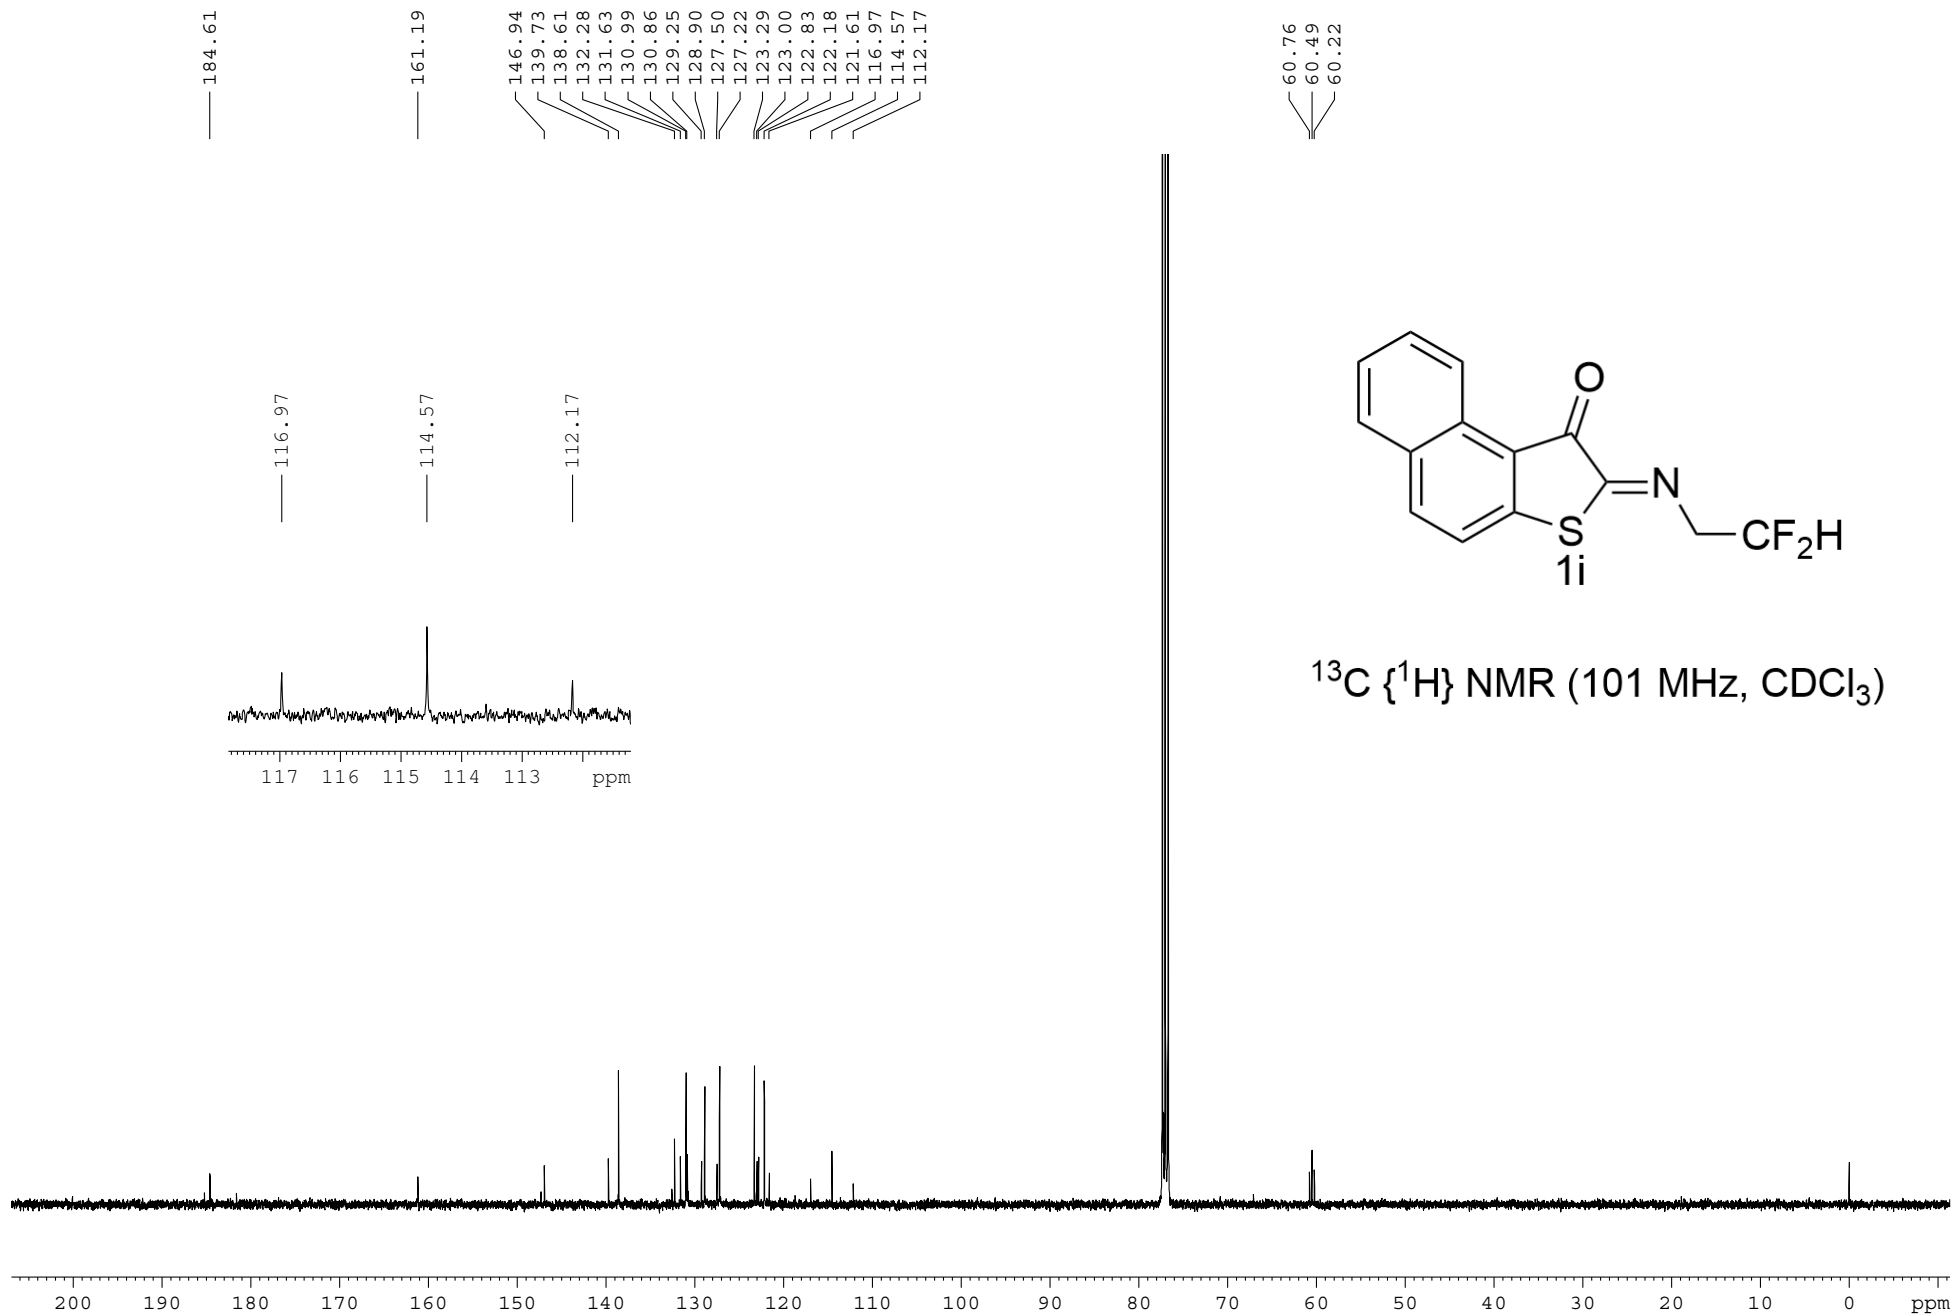

— -120.428

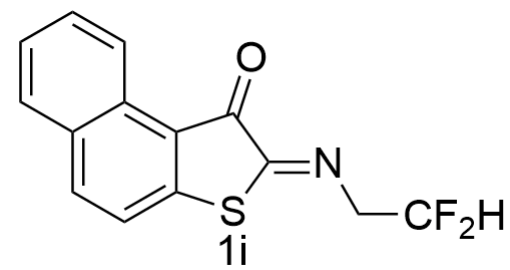

<sup>19</sup>F NMR (376 MHz, CDCl<sub>3</sub>)

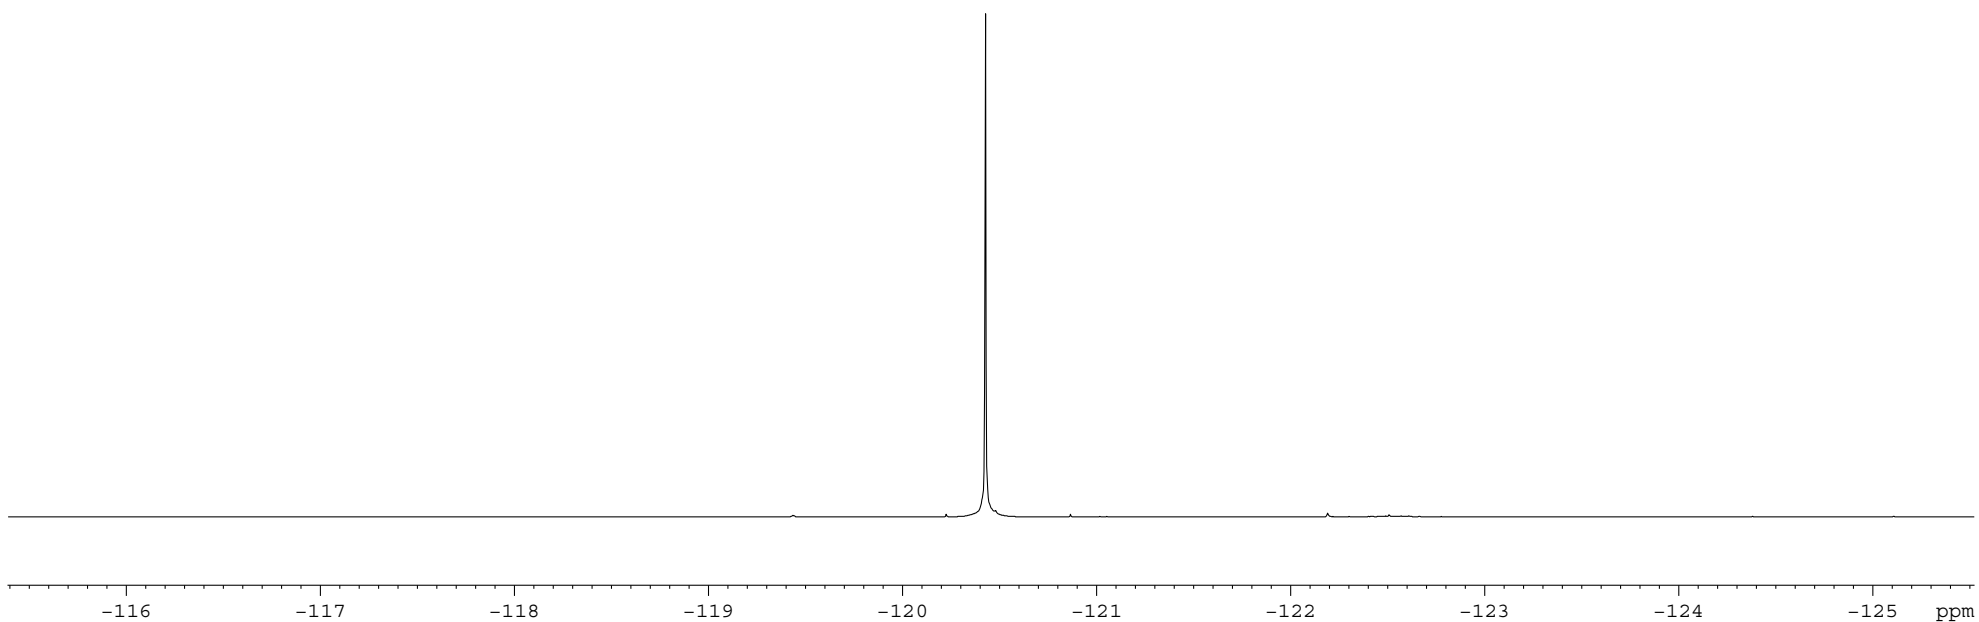

S82

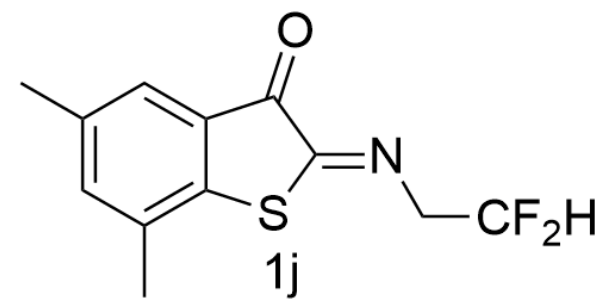

<sup>1</sup>H NMR (400 MHz, CDCl<sub>3</sub>)

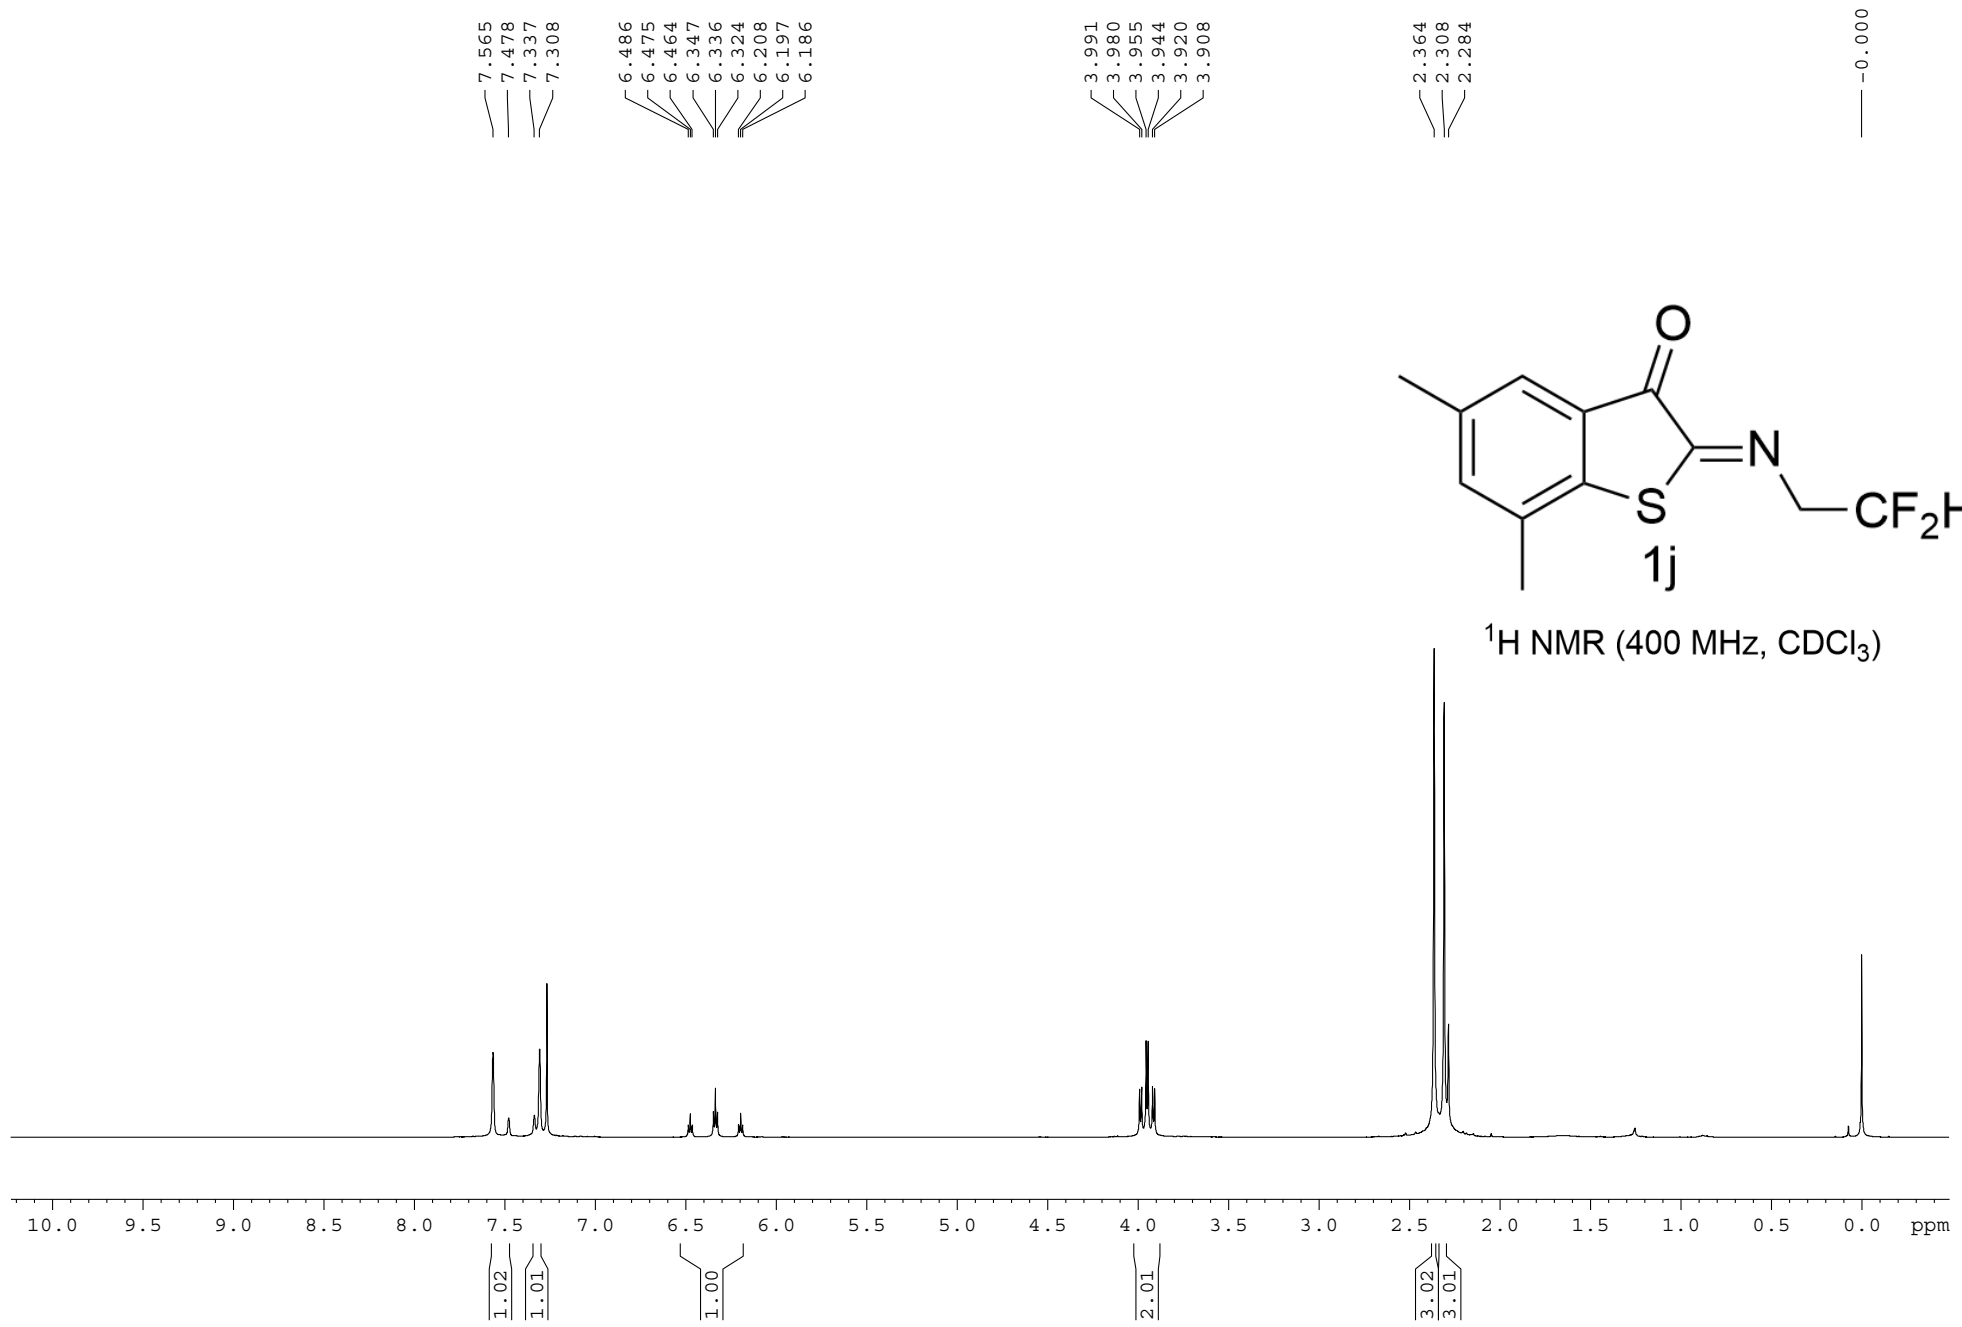

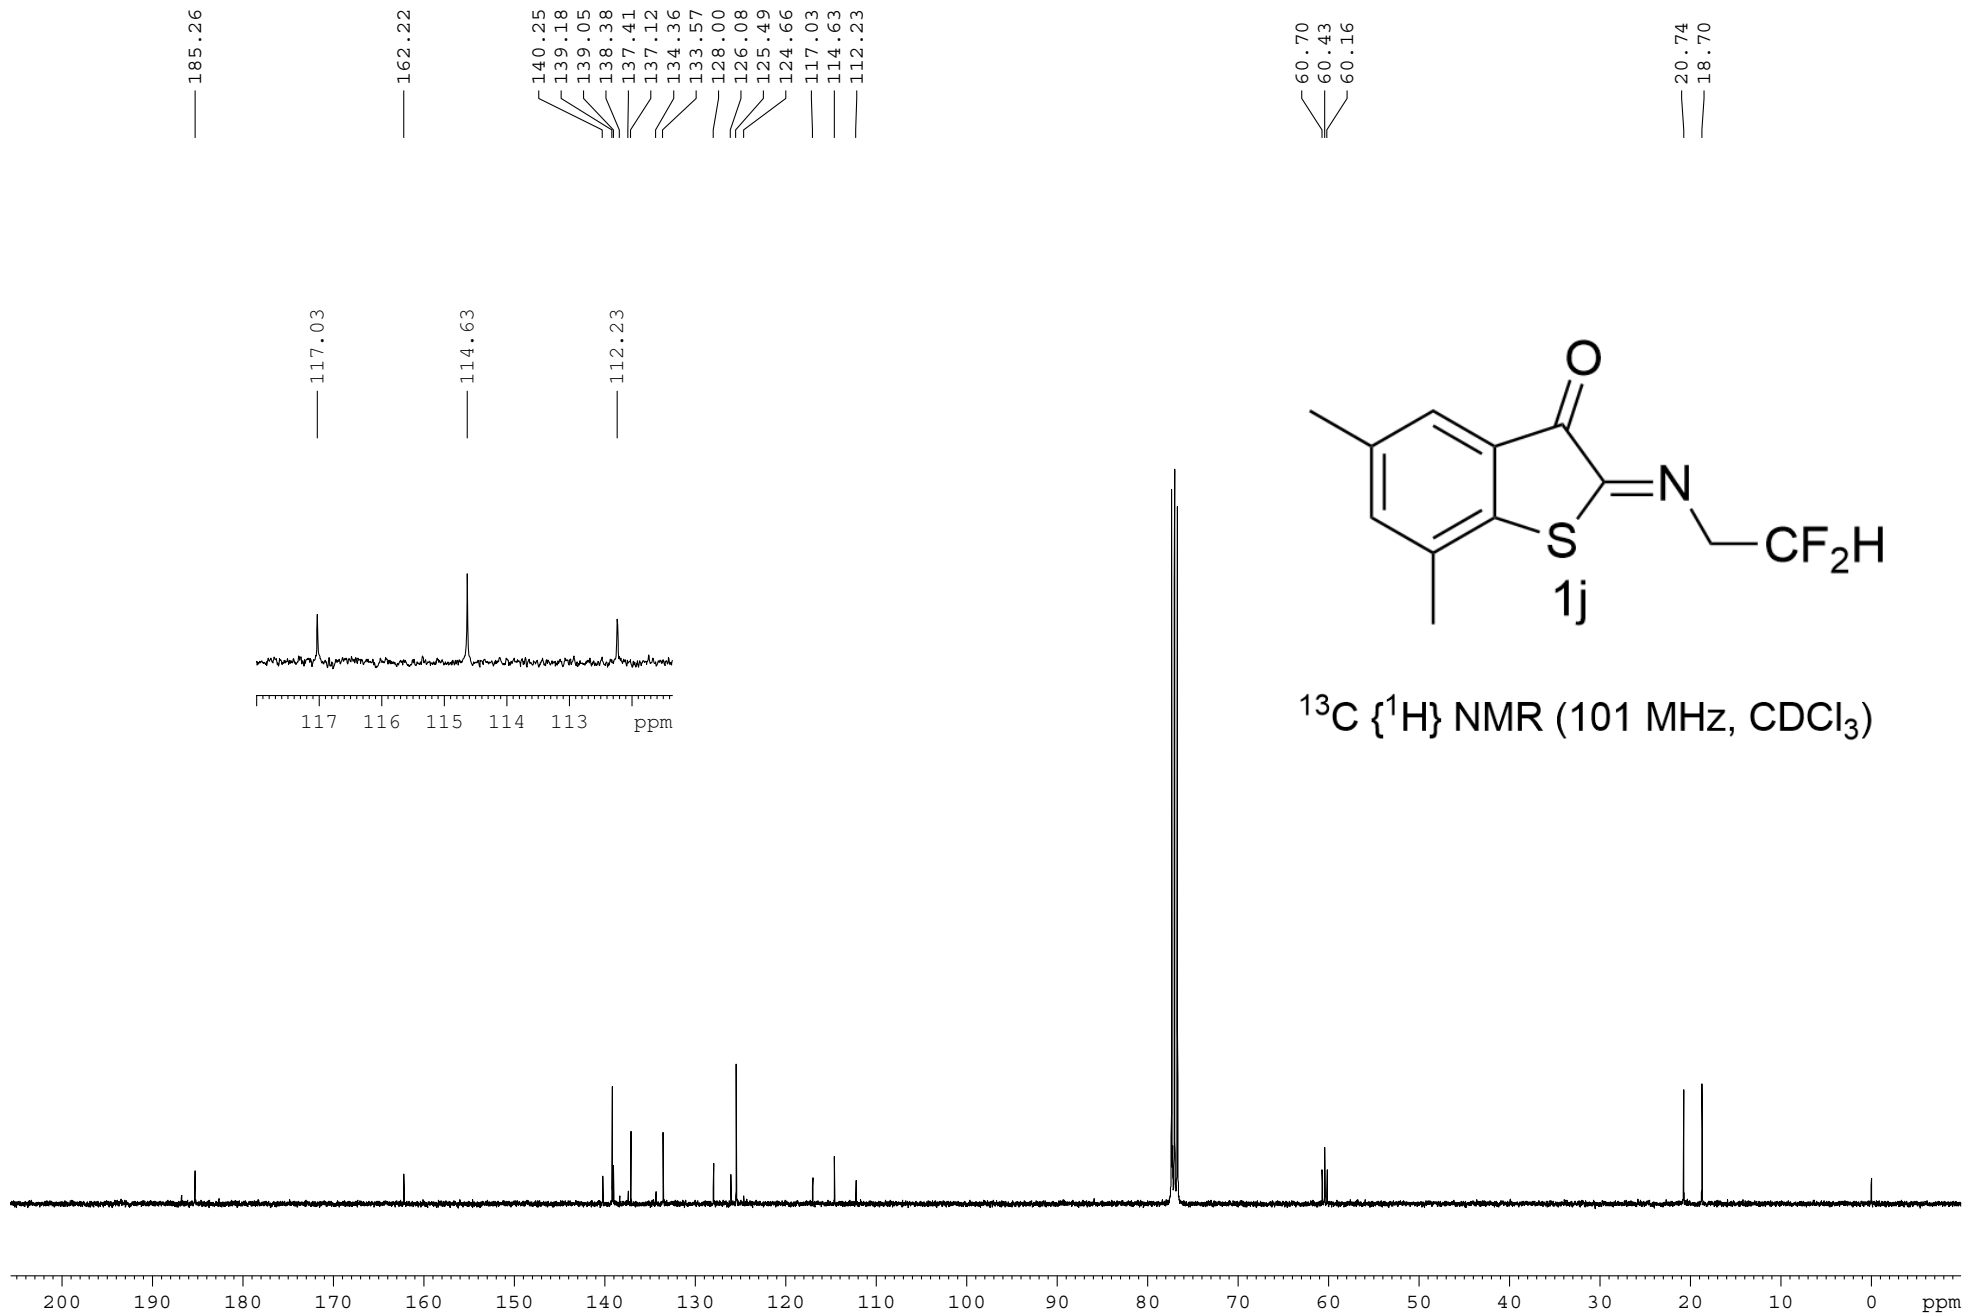



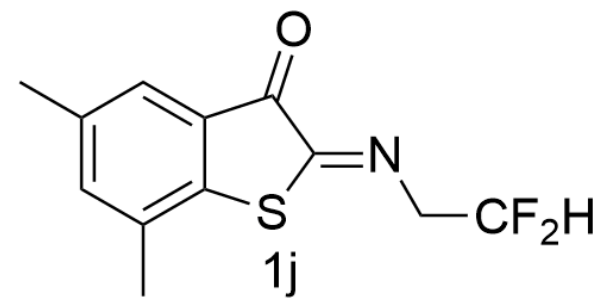

$^{19}\text{F}$  NMR (376 MHz,  $\text{CDCl}_3$ )

— -120.472

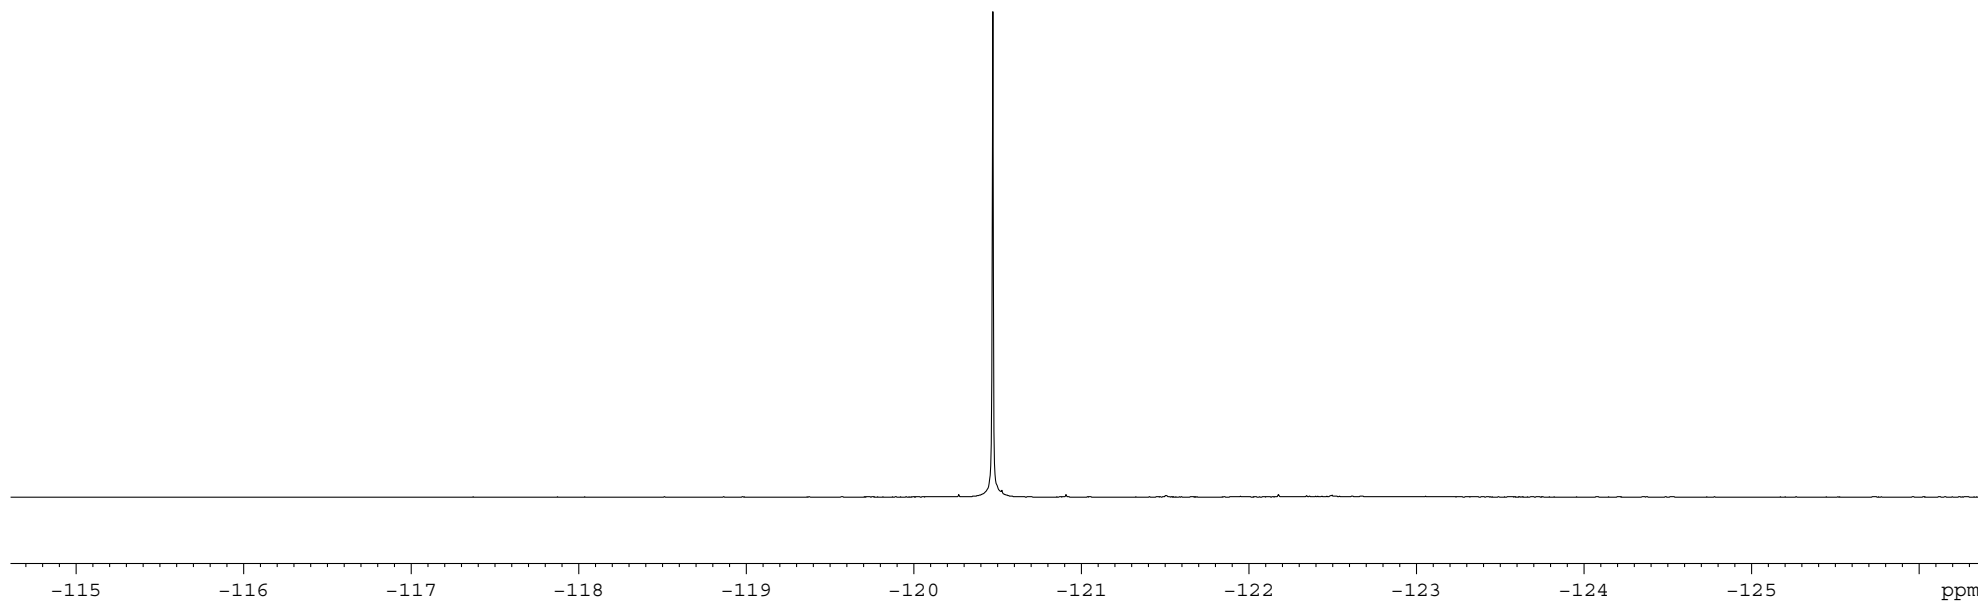

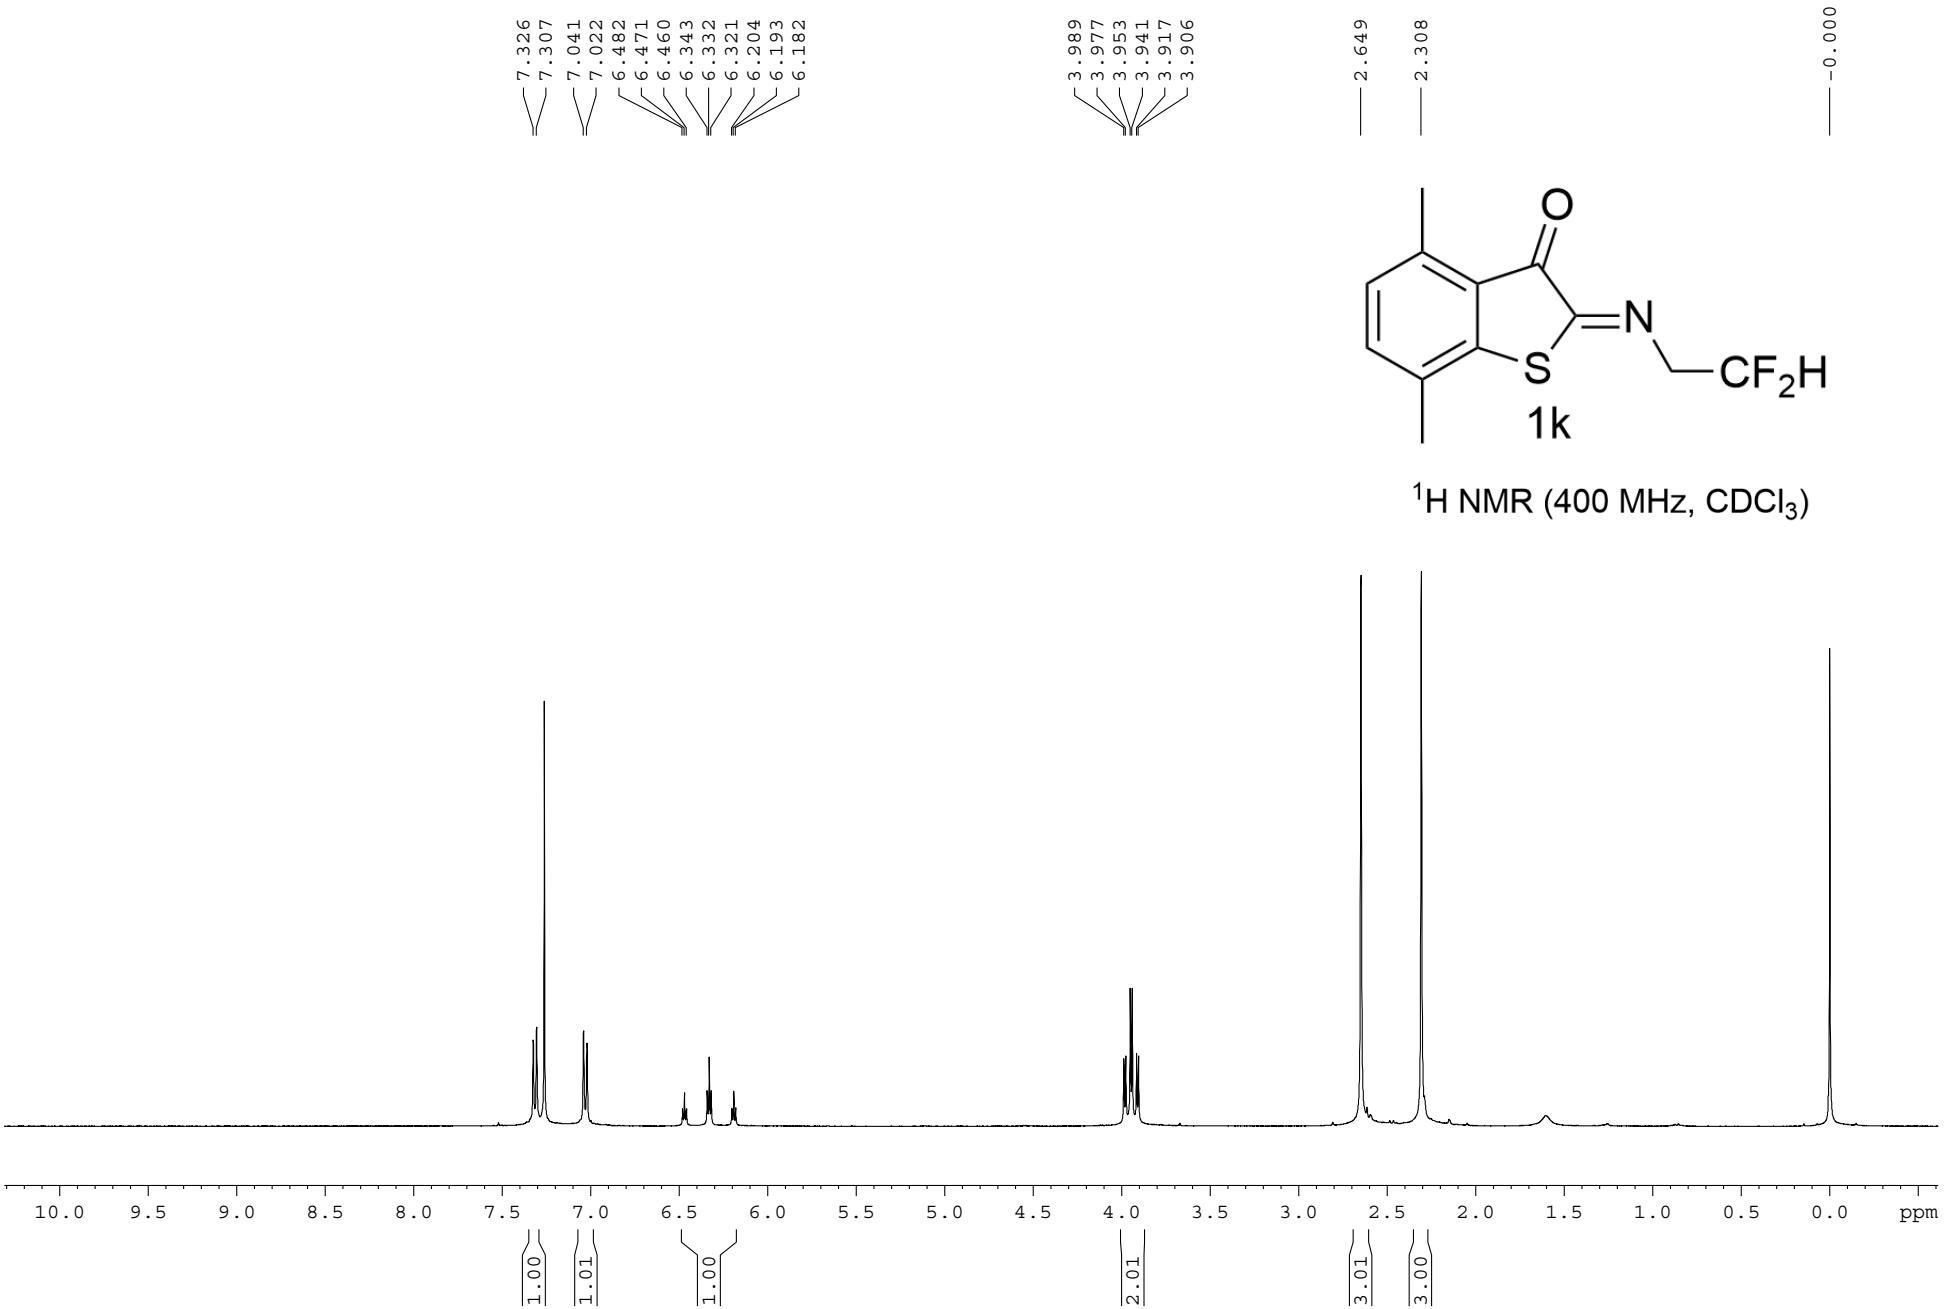

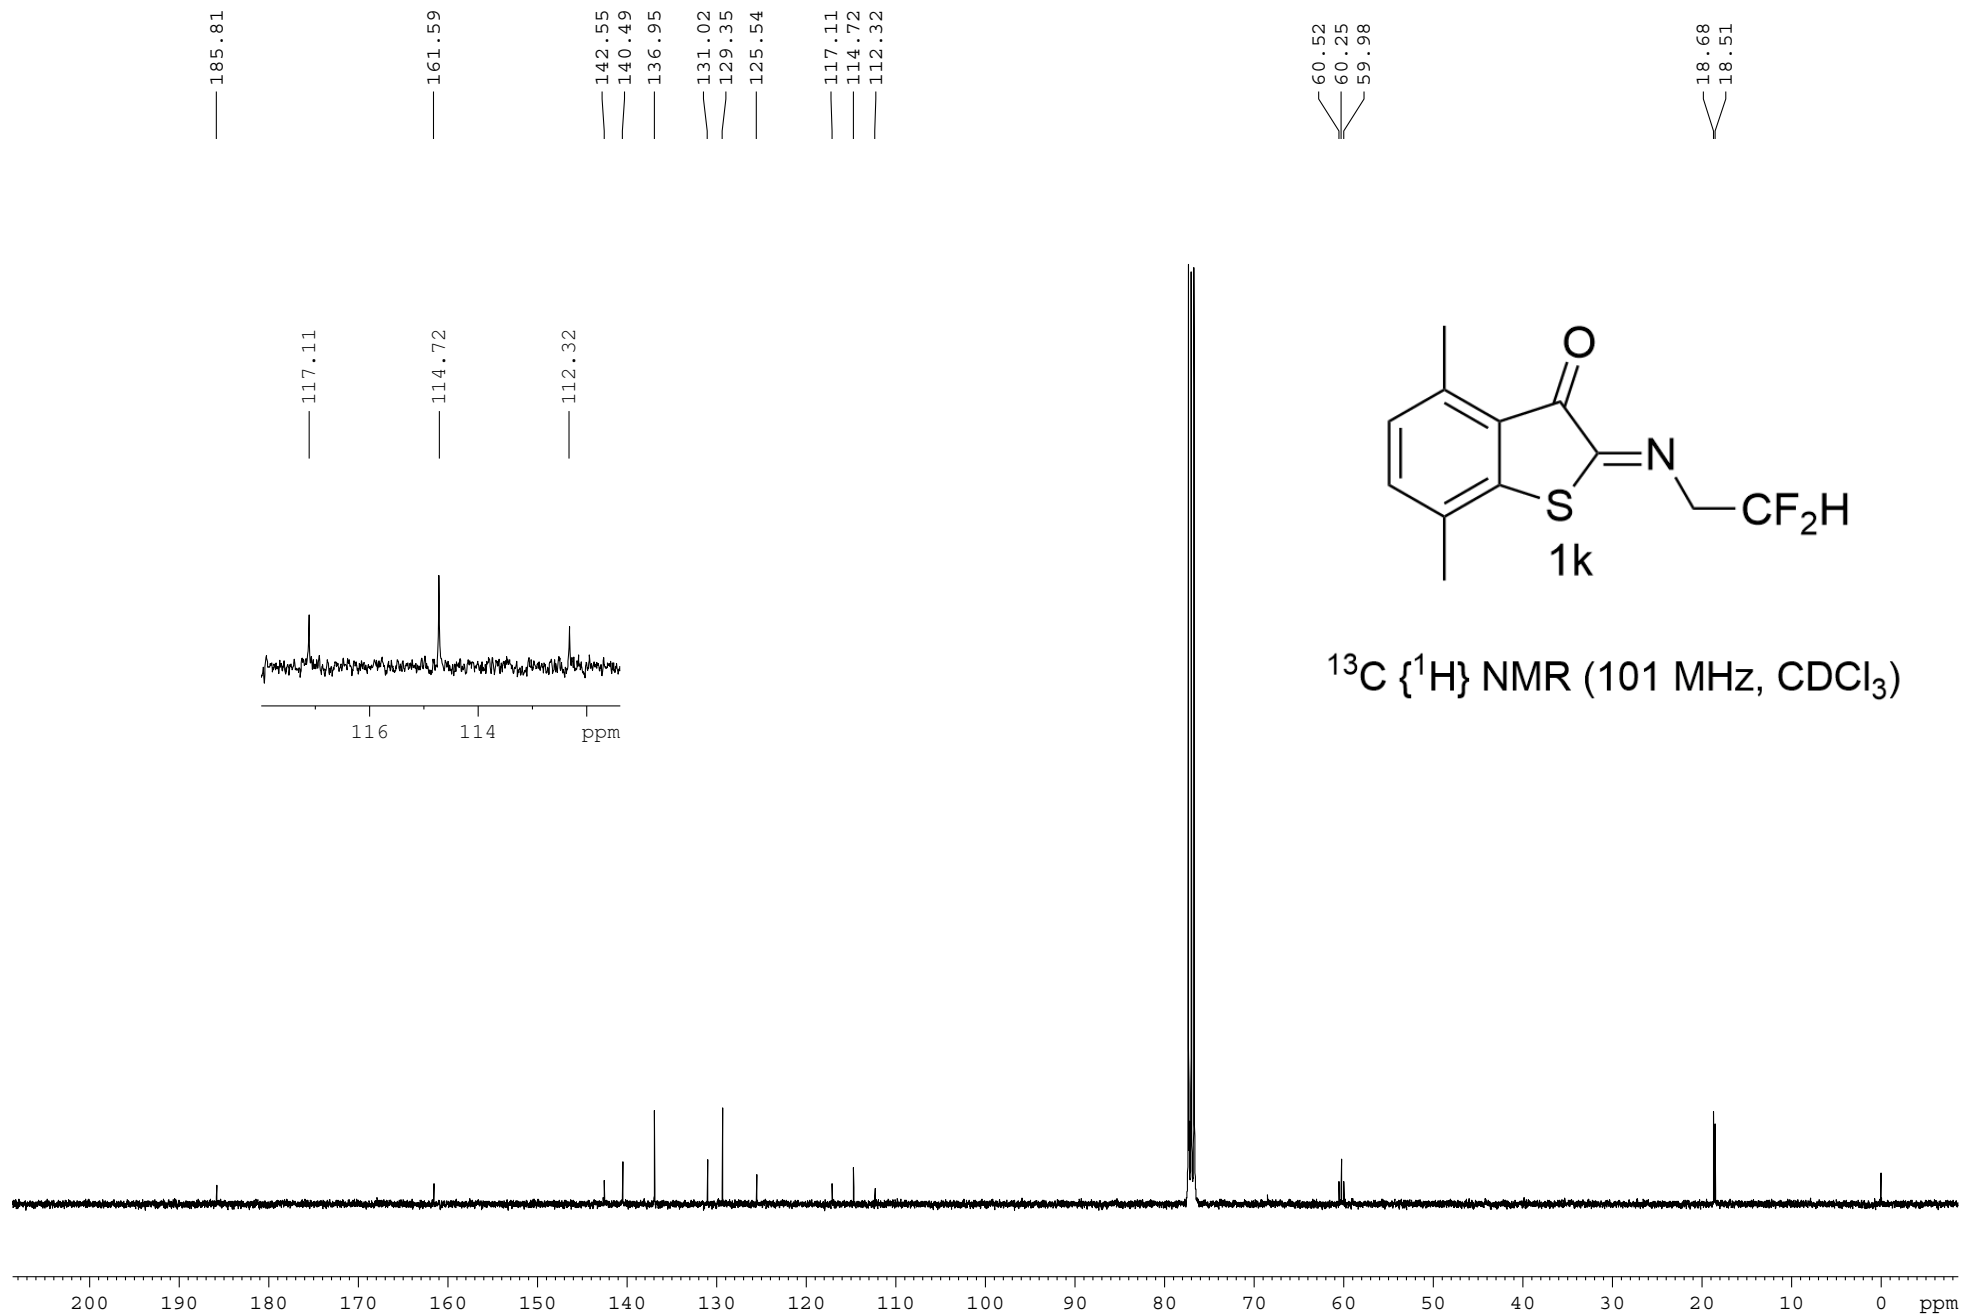

— -120.487

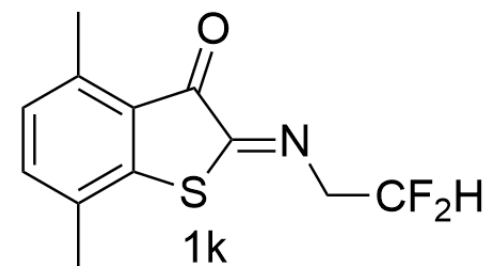

$^{19}\text{F}$  NMR (376 MHz,  $\text{CDCl}_3$ )

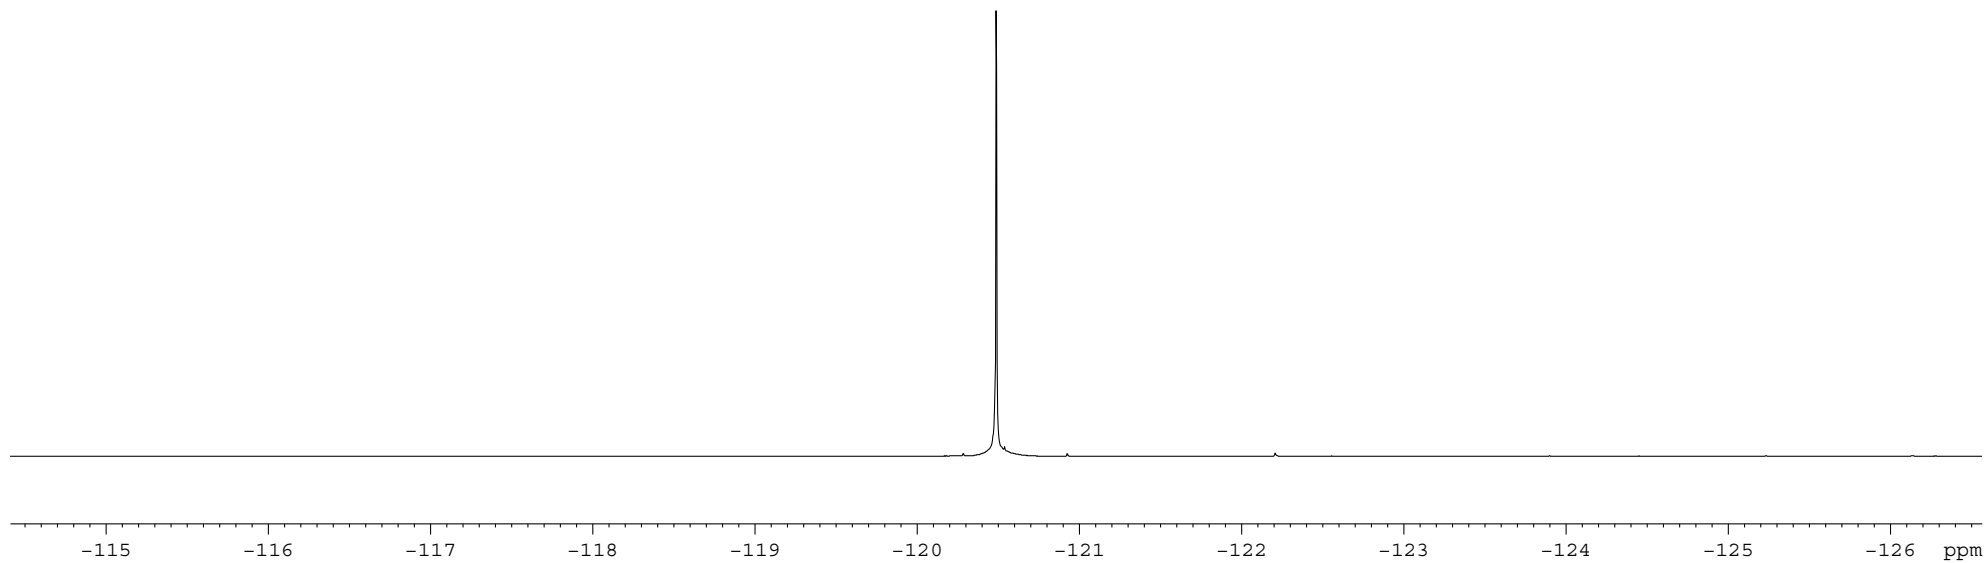

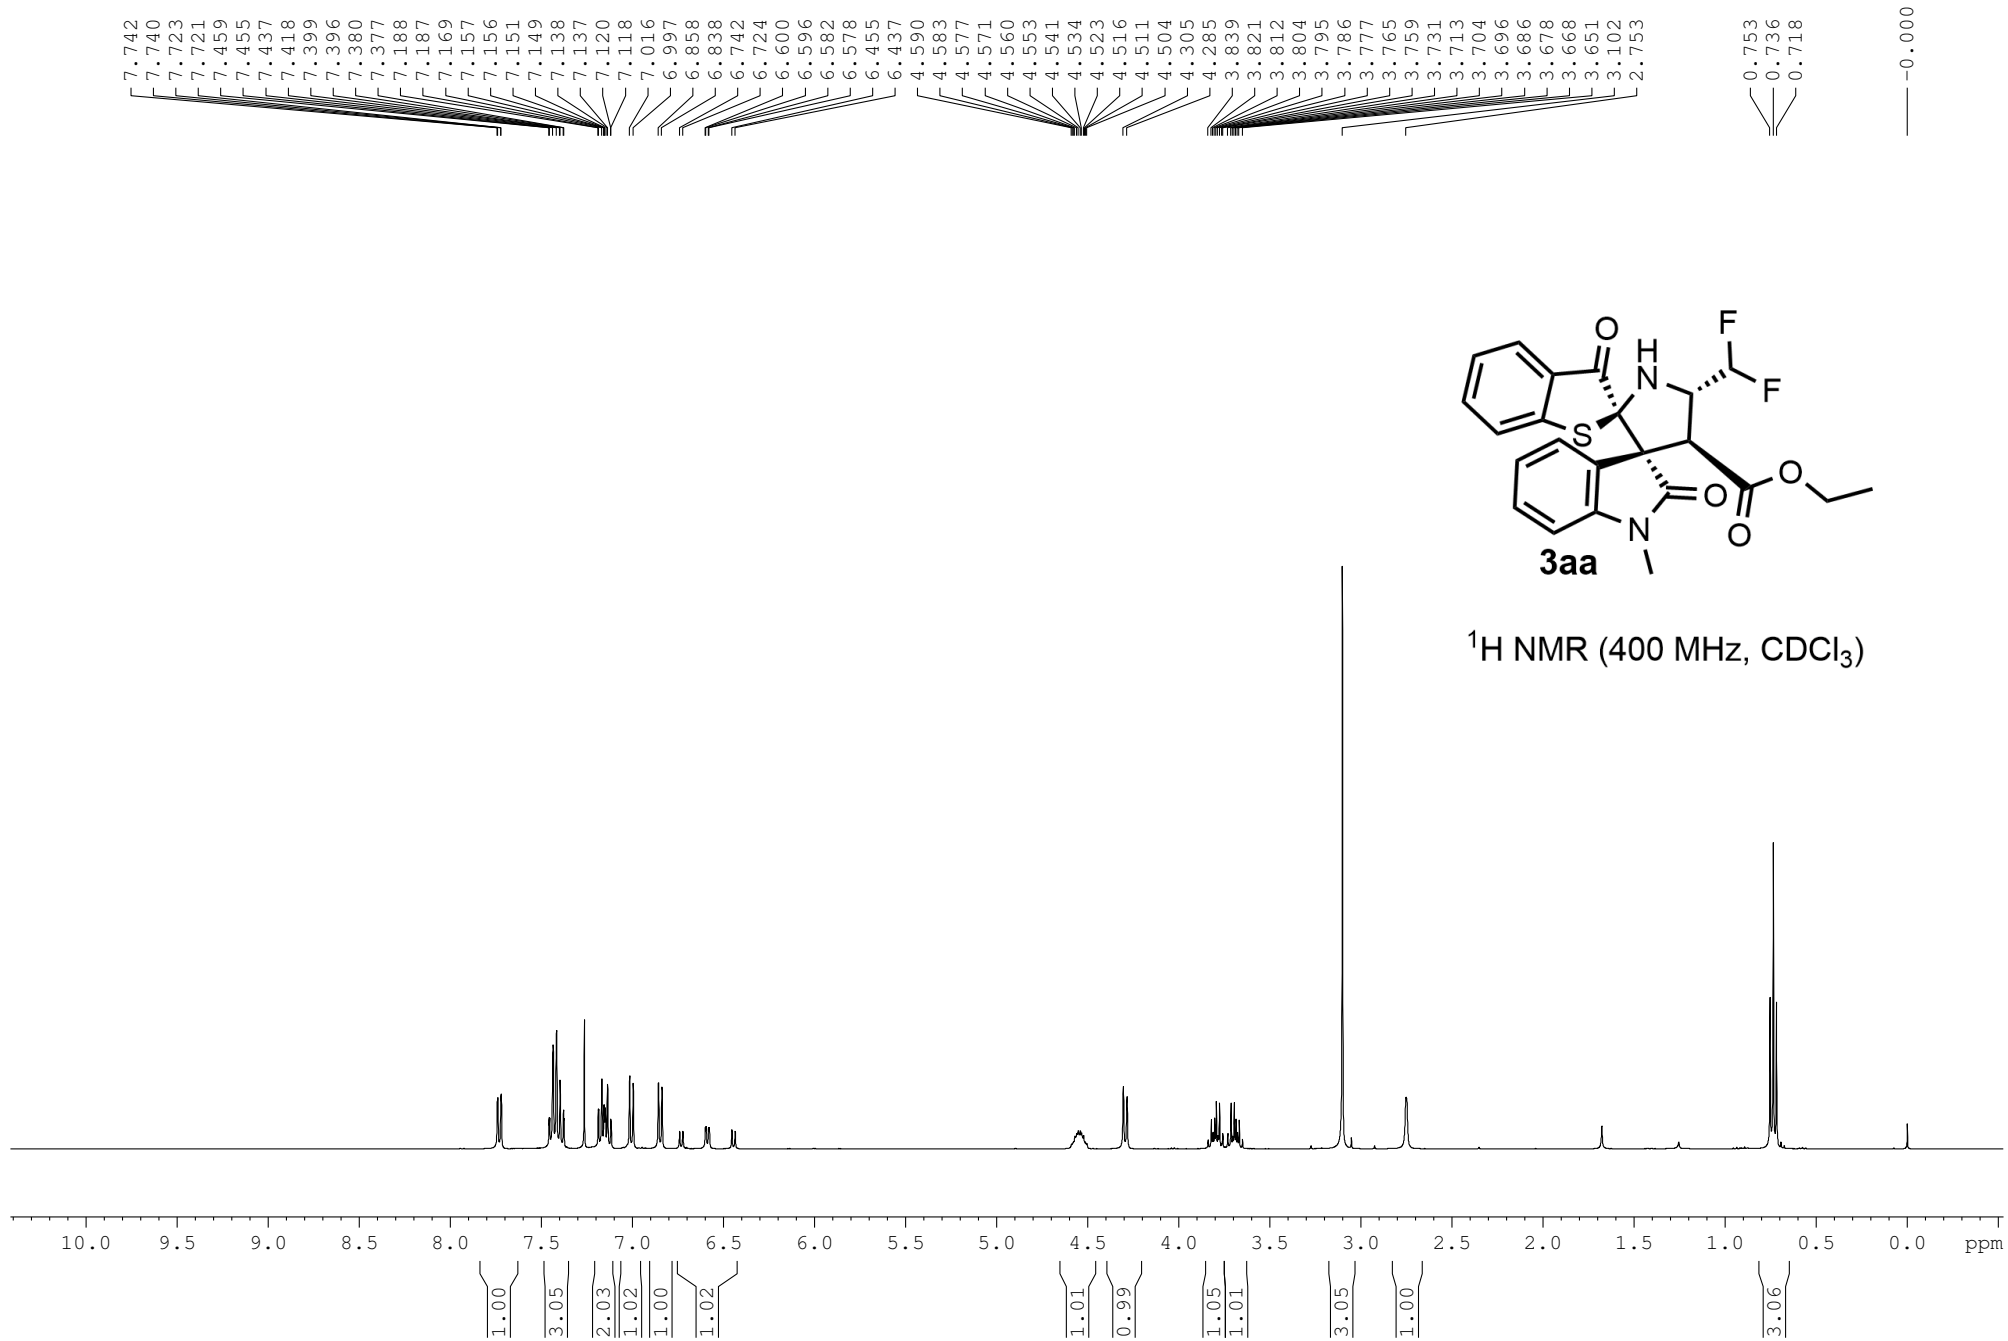

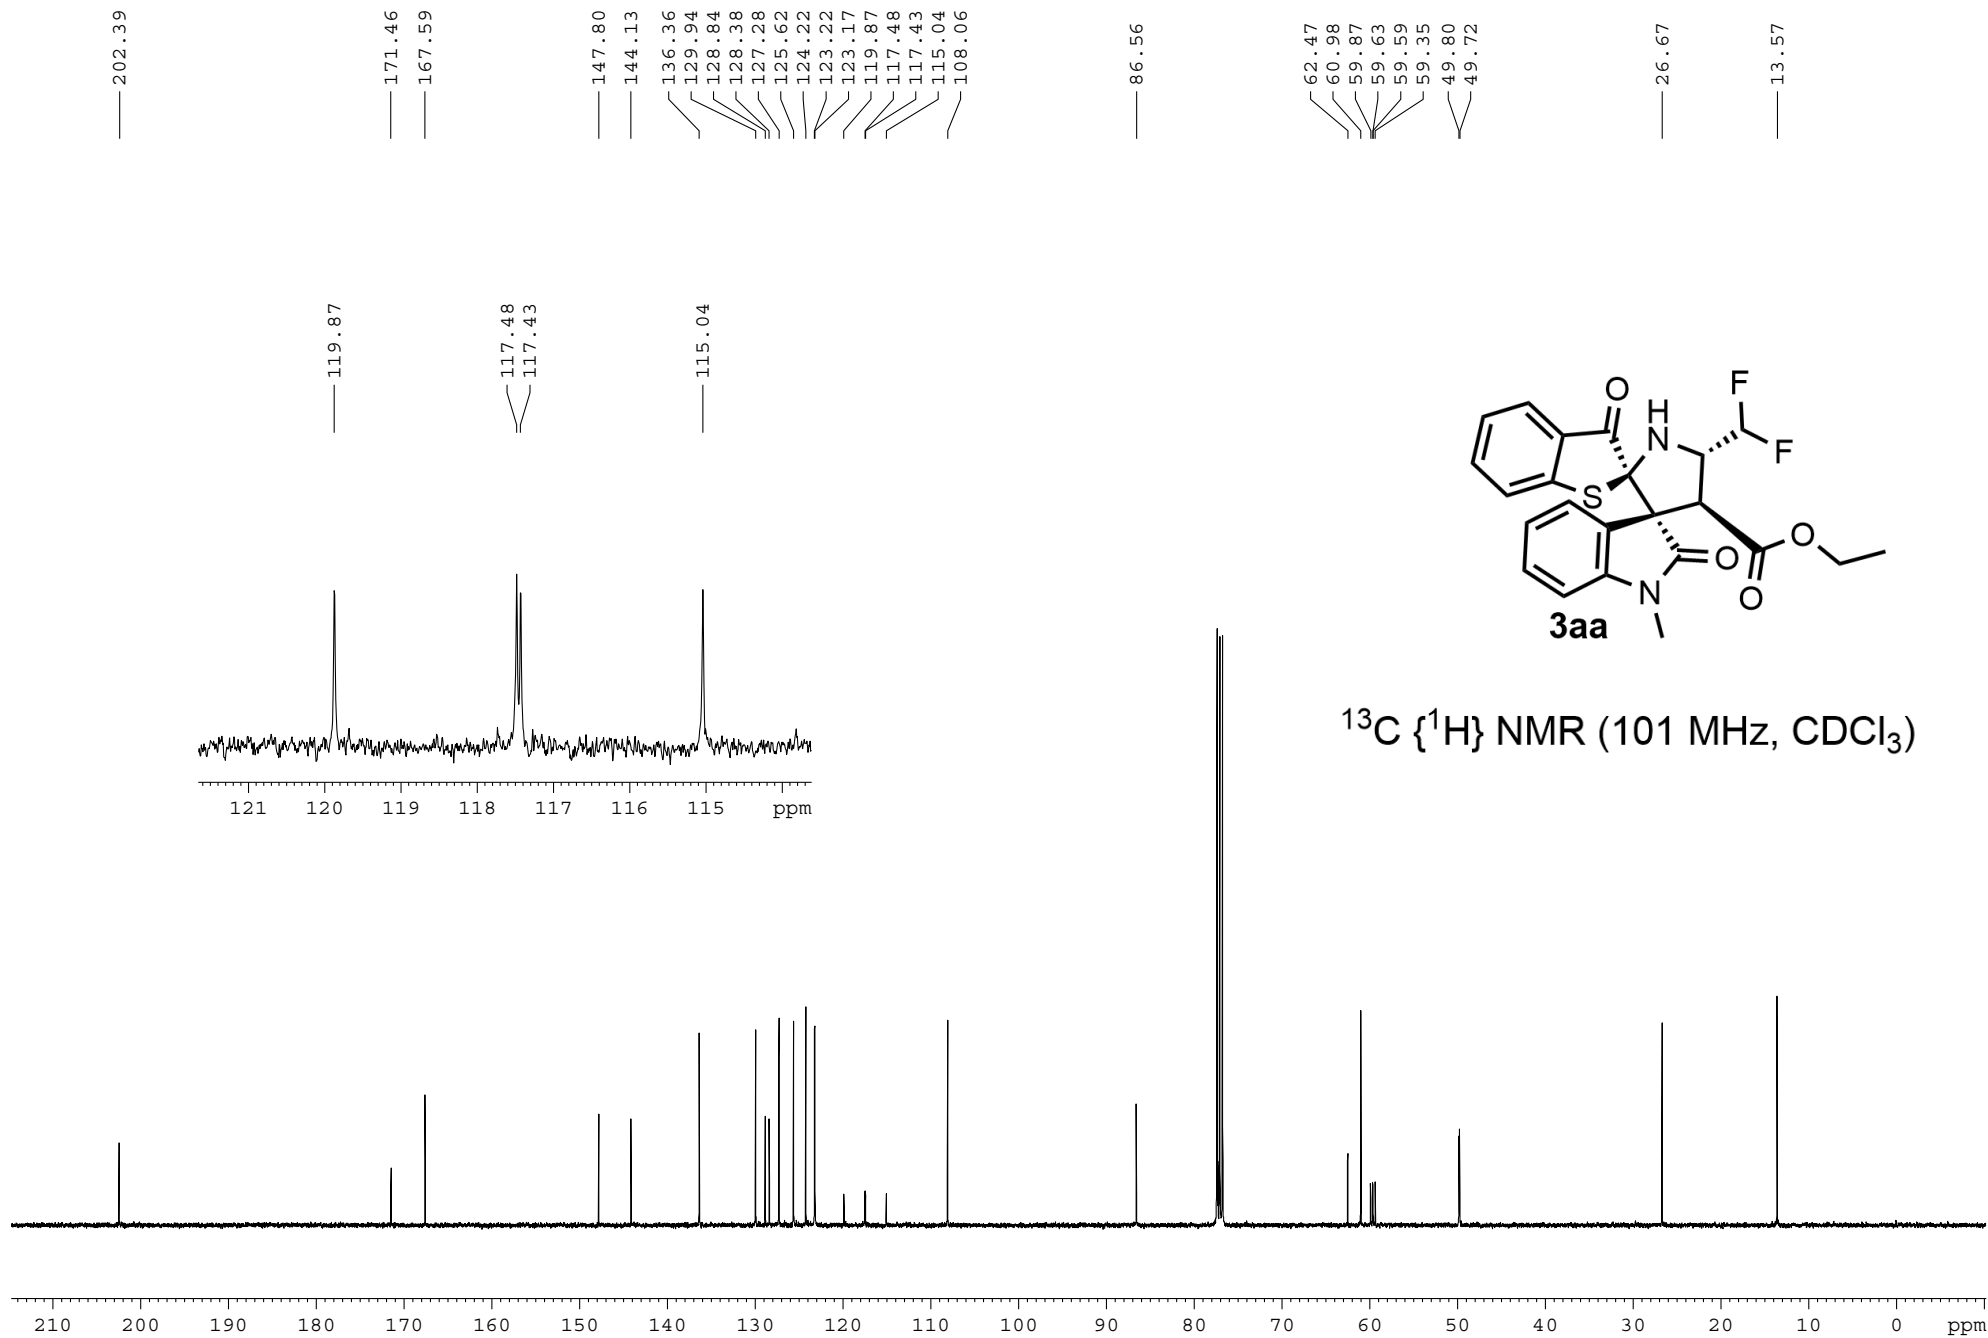

— -118.904

— -119.692

— -122.628

— -123.415

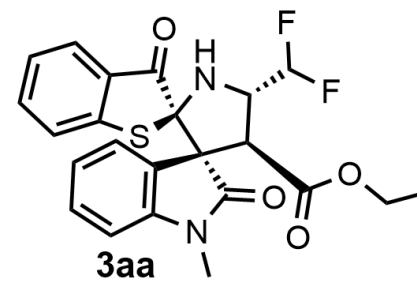

$^{19}\text{F}$  NMR (376 MHz,  $\text{CDCl}_3$ )

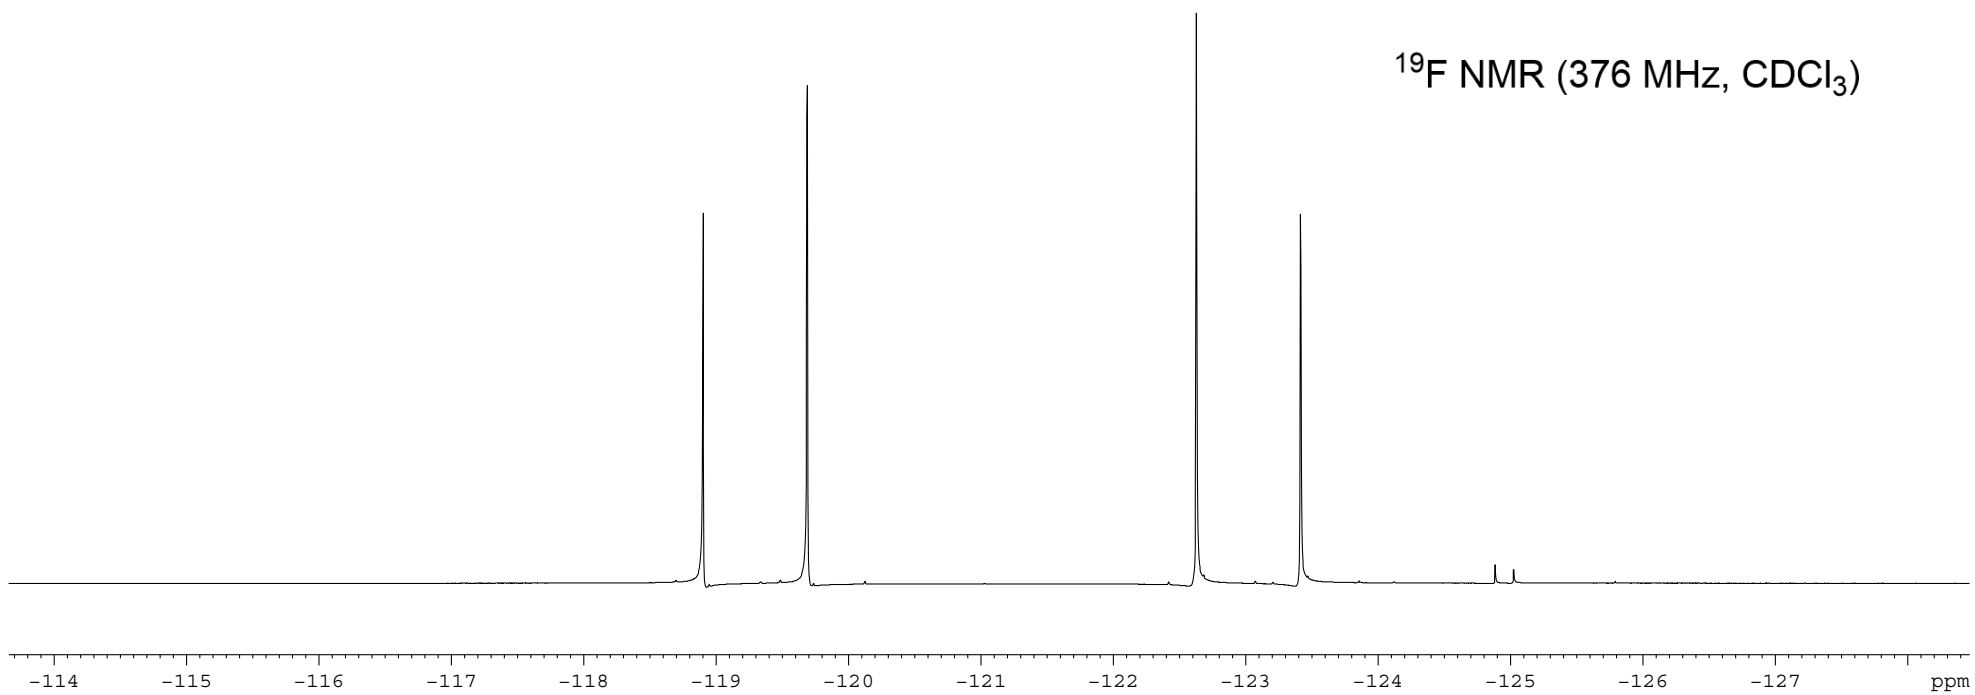

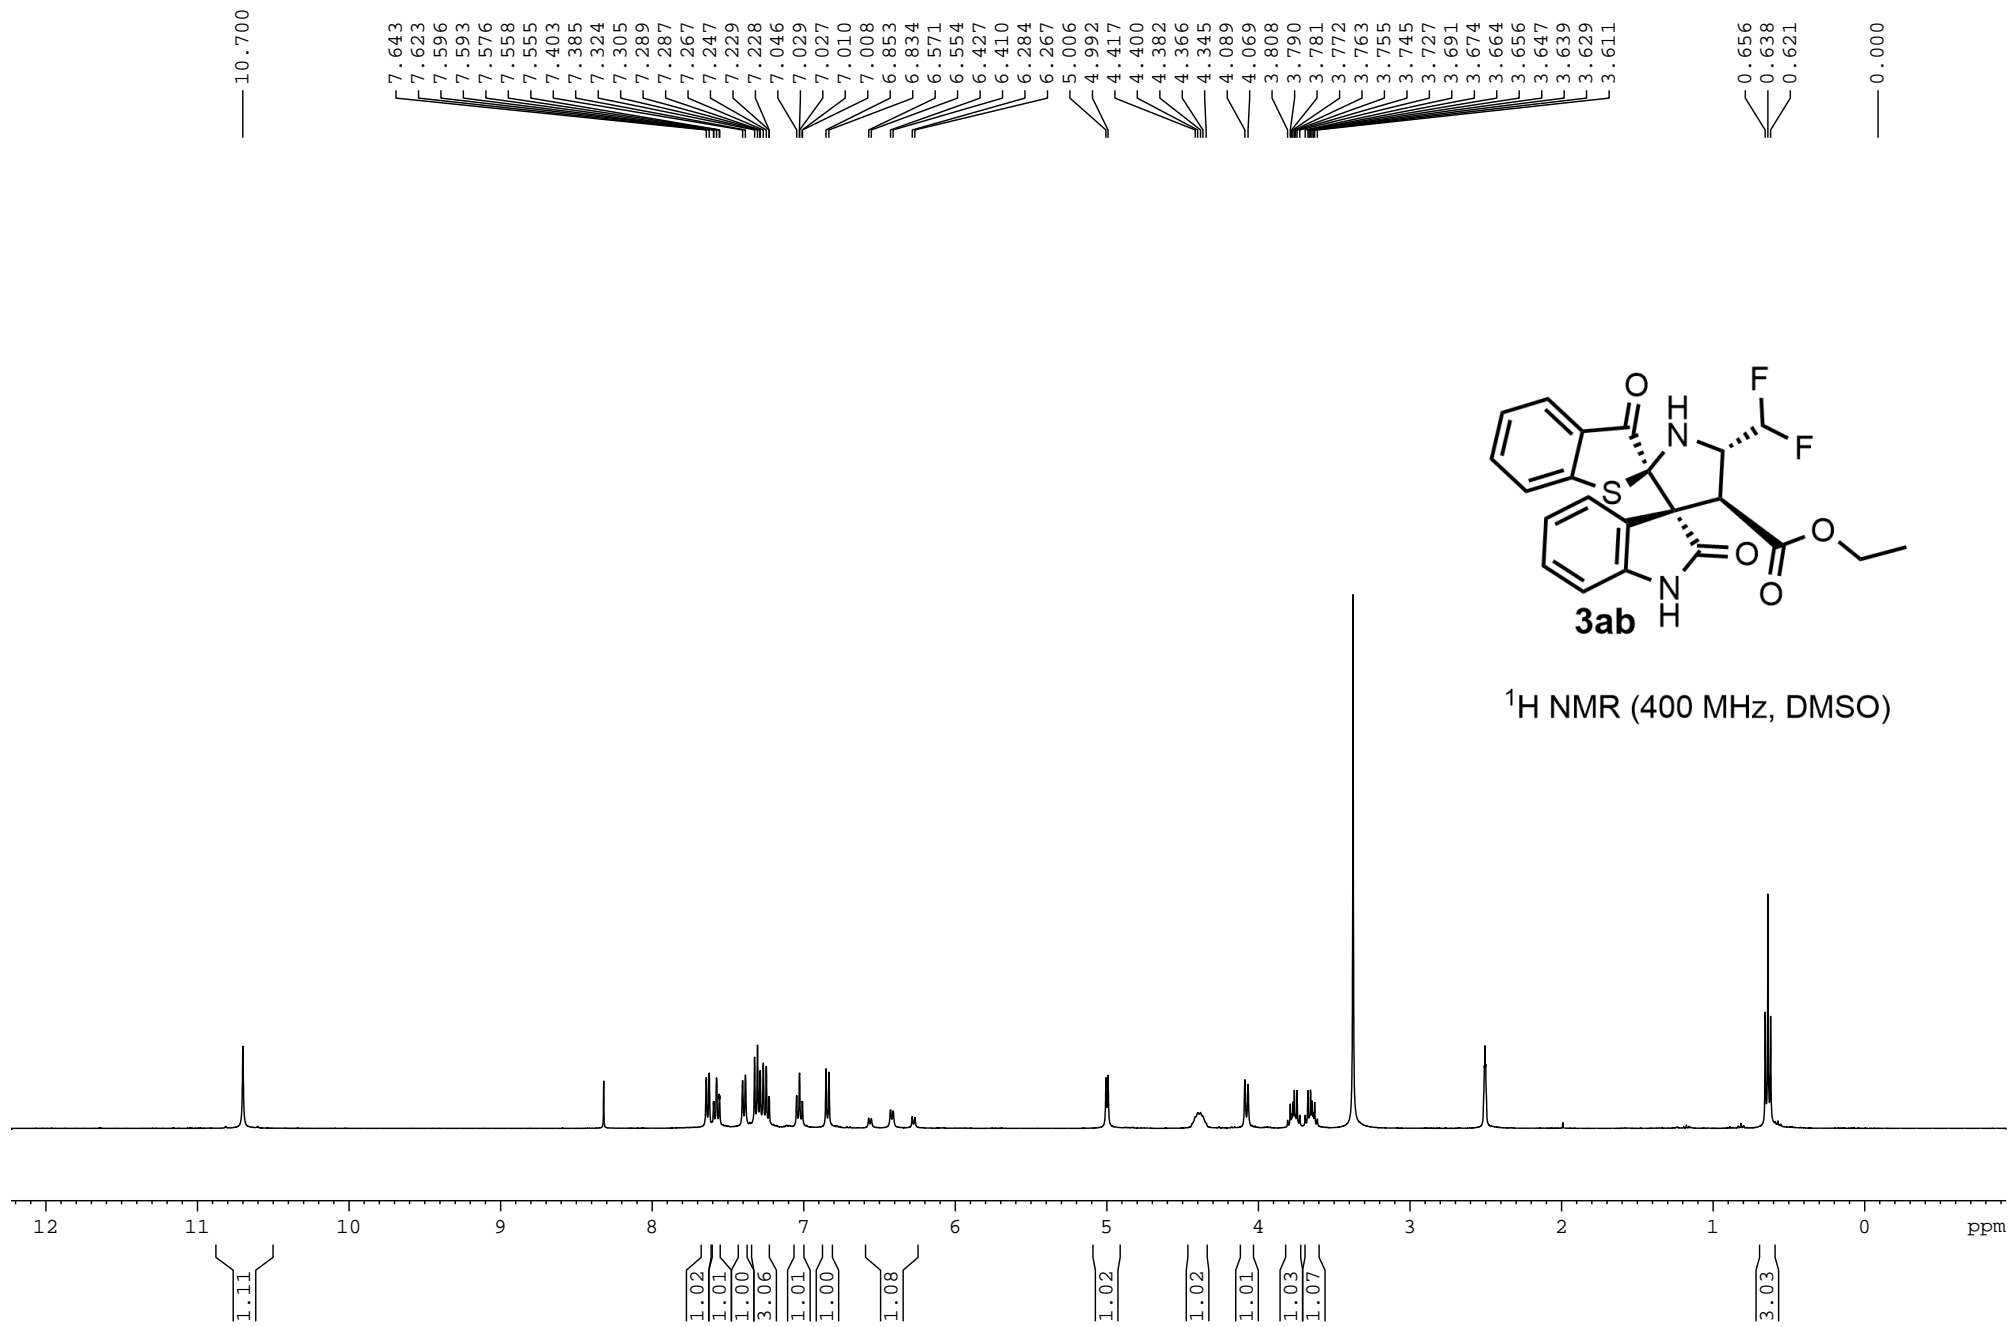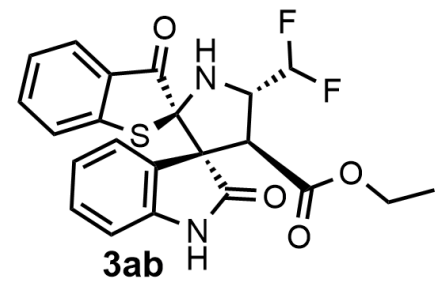

<sup>1</sup>H NMR (400 MHz, DMSO)



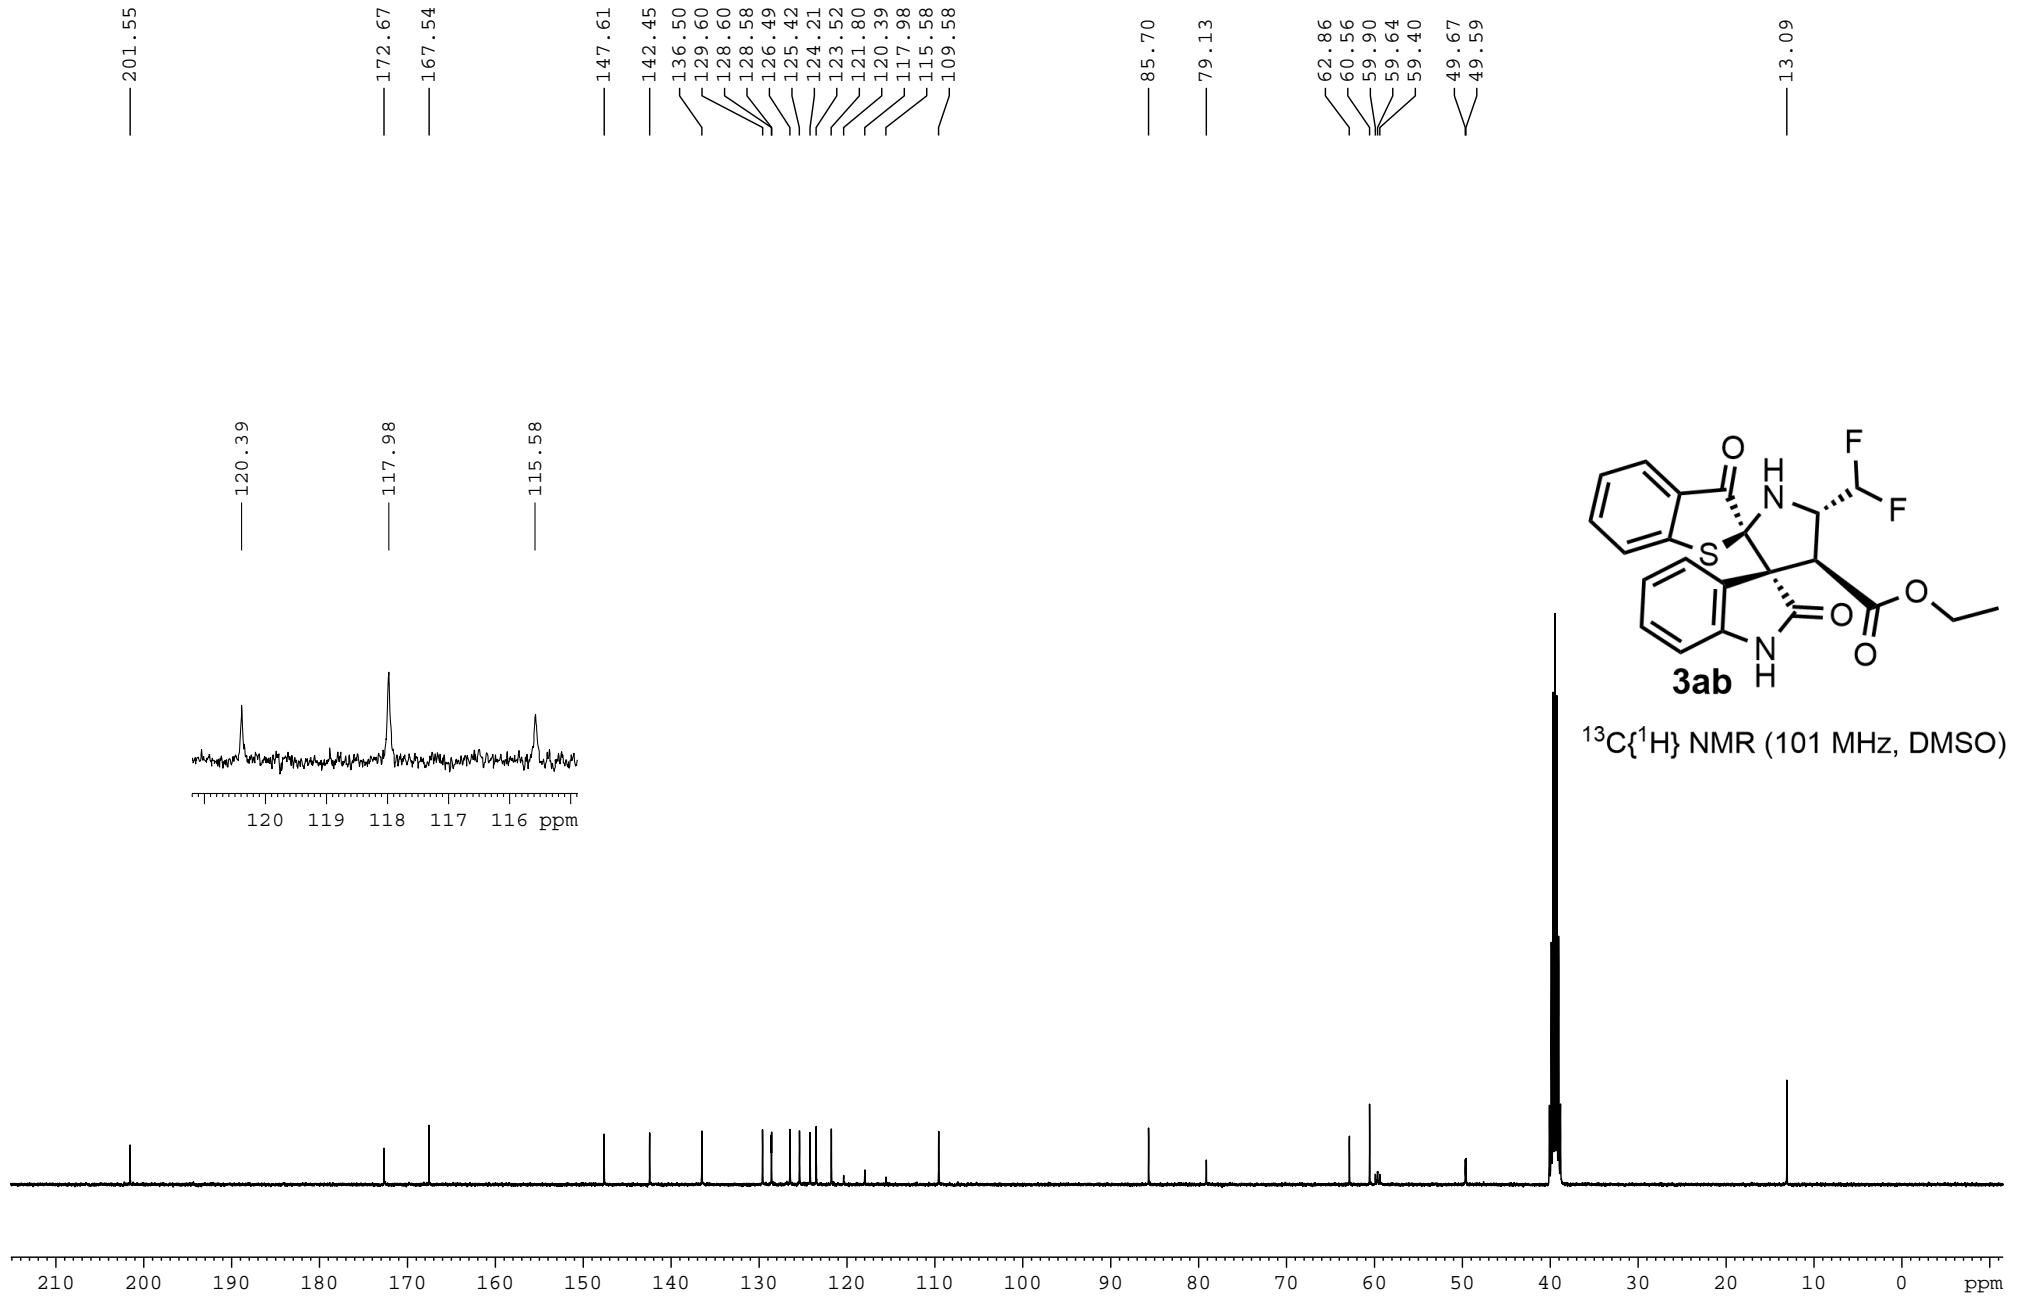

— -116.498

— -117.262

— -121.569

— -122.333

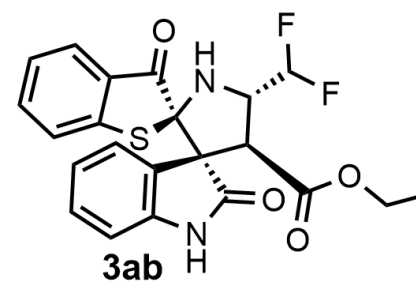

$^{19}\text{F}$  NMR (376 MHz, DMSO)

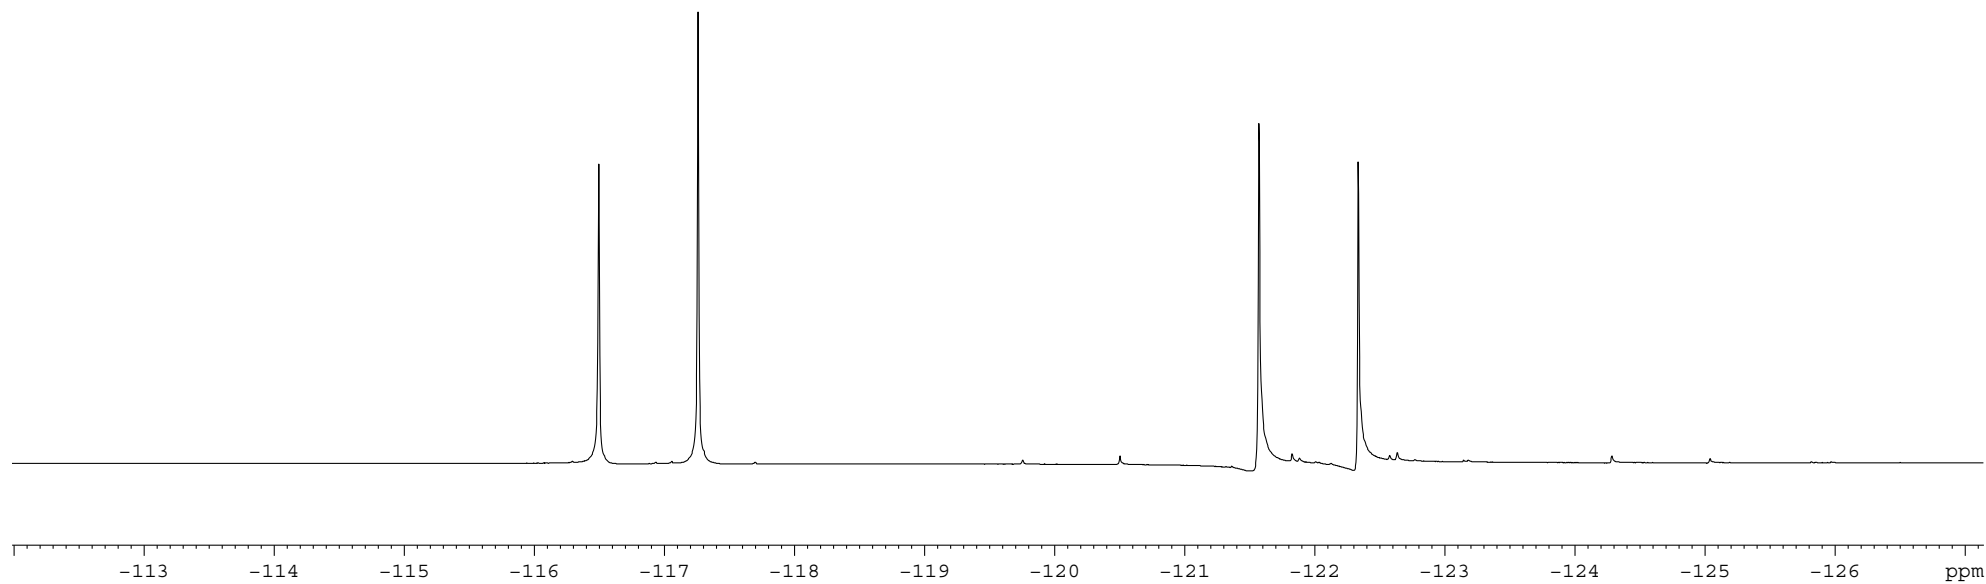

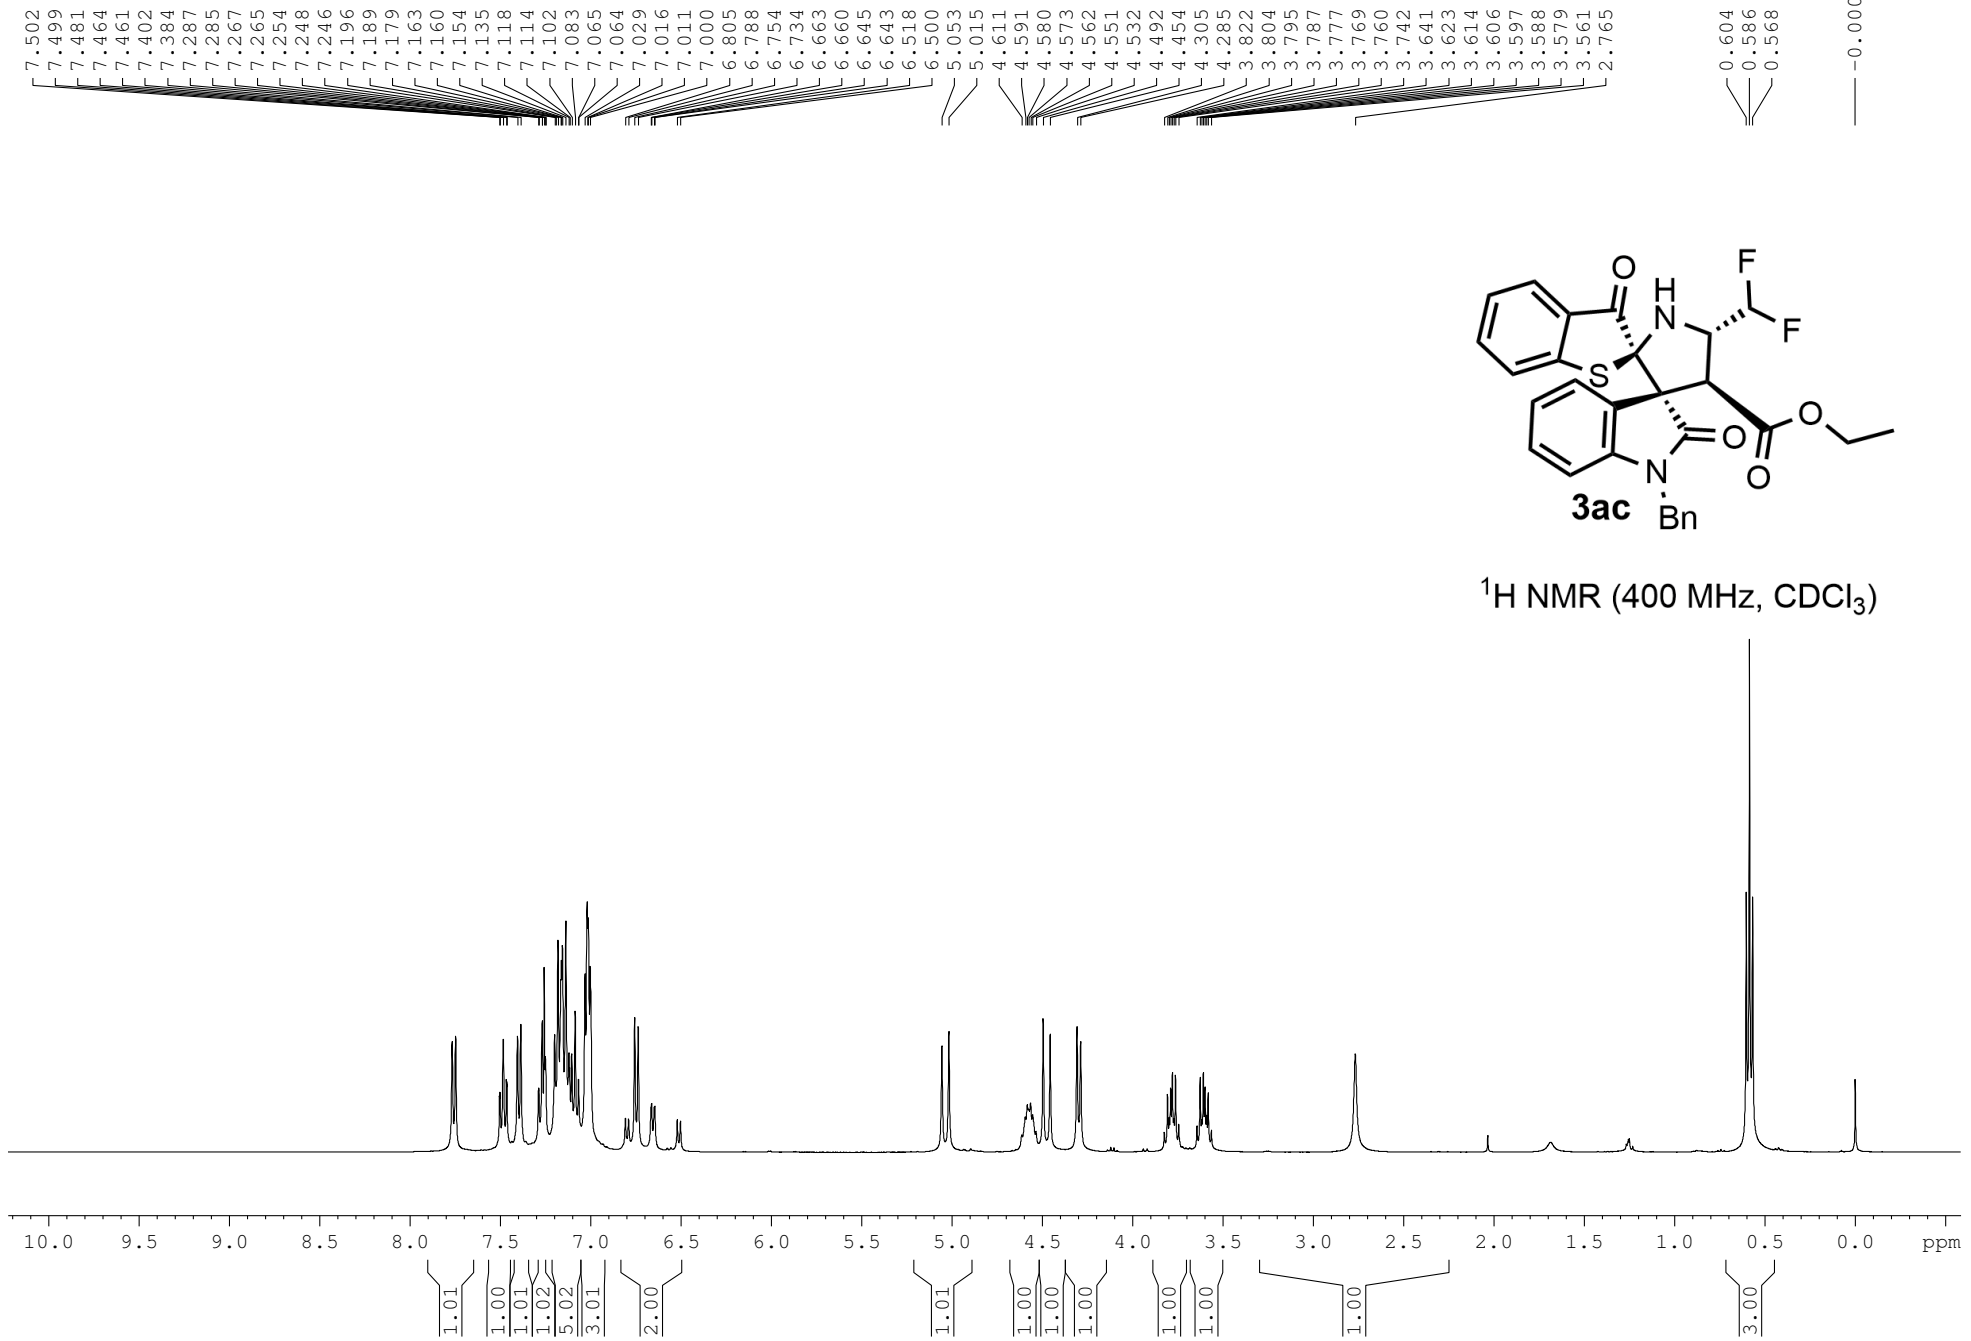

— 202.58

— 171.67

— 167.60

147.64  
143.32  
136.33  
135.28  
129.78  
128.96  
128.62  
128.57  
127.61  
127.37  
127.32  
125.70  
124.21  
123.19  
123.13  
120.02  
117.63  
117.58  
115.19  
108.97

— 87.35

62.48  
61.08  
59.98  
59.74  
59.70  
59.46  
49.53  
49.45  
44.07

— 13.39

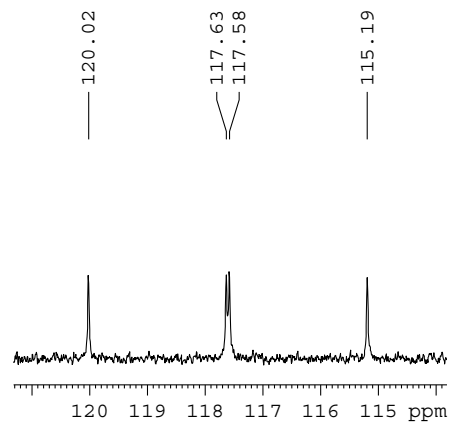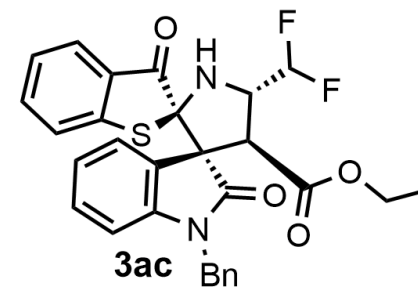

$^{13}\text{C}$   $\{^1\text{H}\}$  NMR (101 MHz,  $\text{CDCl}_3$ )

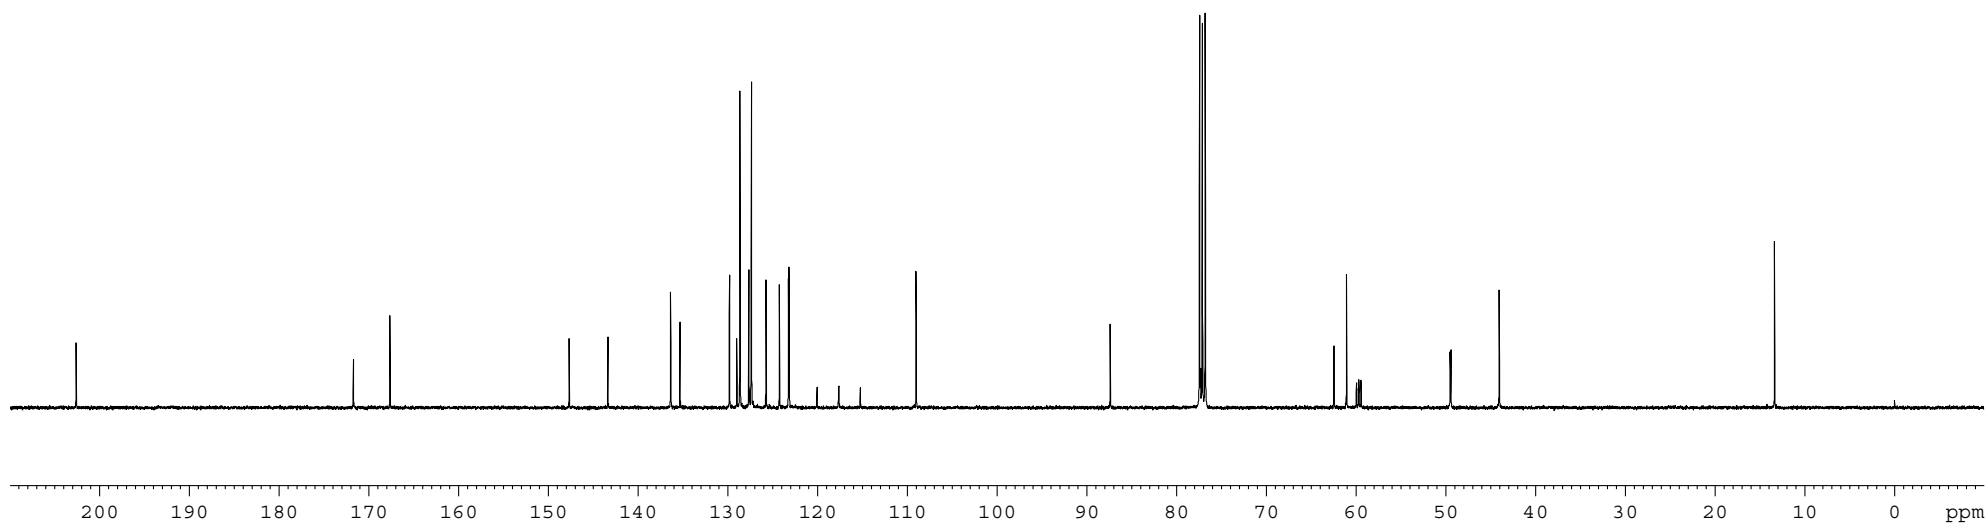

— -118.748

— -119.535

— -122.689

— -123.476

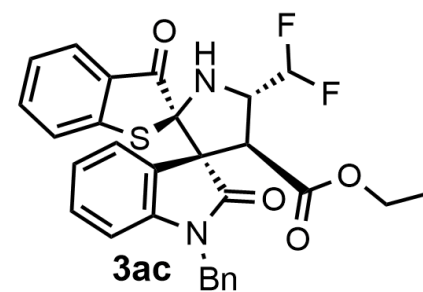

$^{19}\text{F}$  NMR (376 MHz,  $\text{CDCl}_3$ )

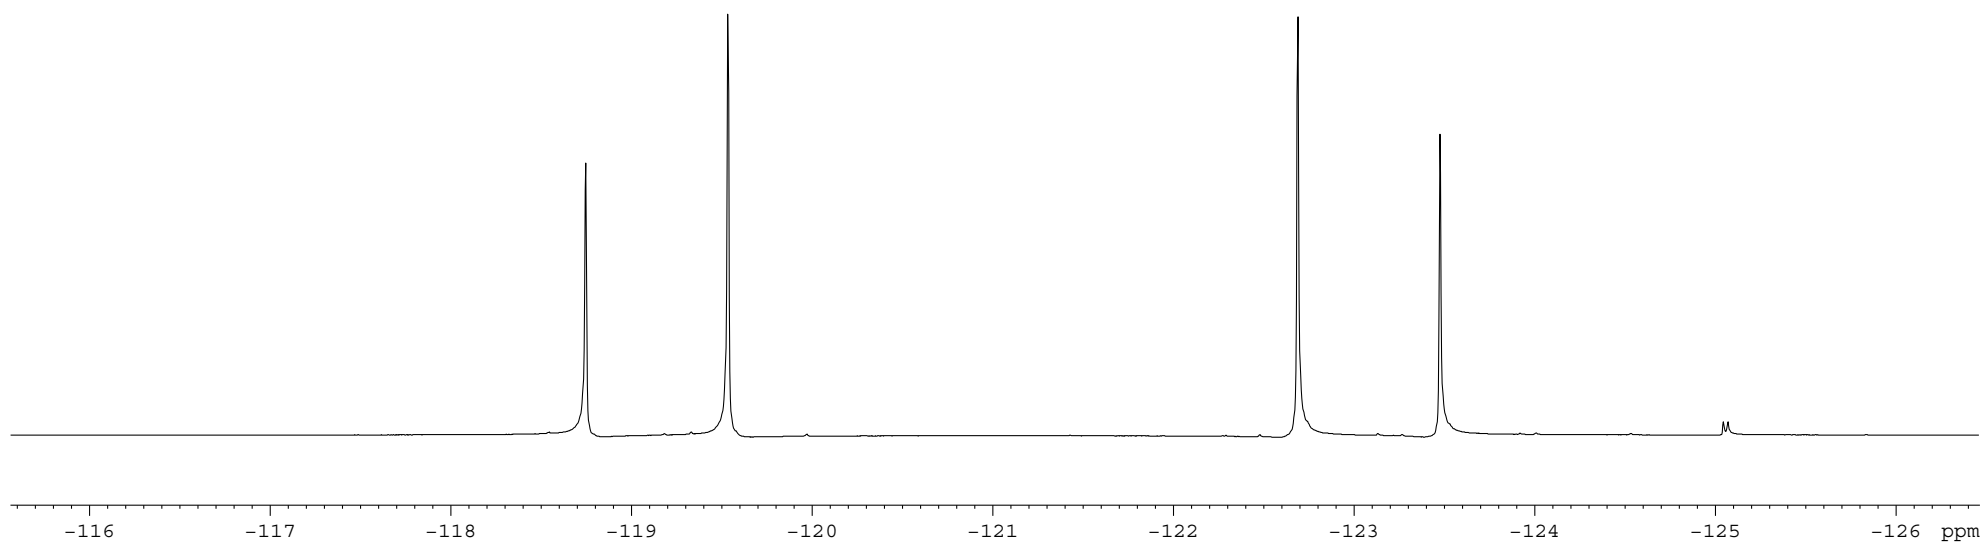

7.859  
7.839  
7.732  
7.713  
7.467  
7.449  
7.440  
7.437  
7.430  
7.433  
7.420  
7.418  
7.400  
7.397  
7.269  
7.253  
7.252  
7.234  
7.233  
7.216  
7.192  
7.173  
7.155  
7.154  
7.038  
7.018  
6.748  
6.730  
6.605  
6.603  
6.588  
6.461  
6.443  
4.556  
4.537  
4.526  
4.518  
4.508  
4.496  
4.478  
4.314  
4.294  
3.836  
3.818  
3.809  
3.800  
3.791  
3.782  
3.773  
3.755  
3.738  
3.729  
3.720  
3.711  
3.702  
3.693  
3.675

1.664  
1.645  
1.488

0.790  
0.772  
0.754

-0.000

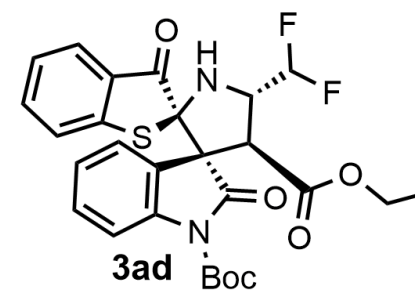

<sup>1</sup>H NMR (400 MHz, CDCl<sub>3</sub>)

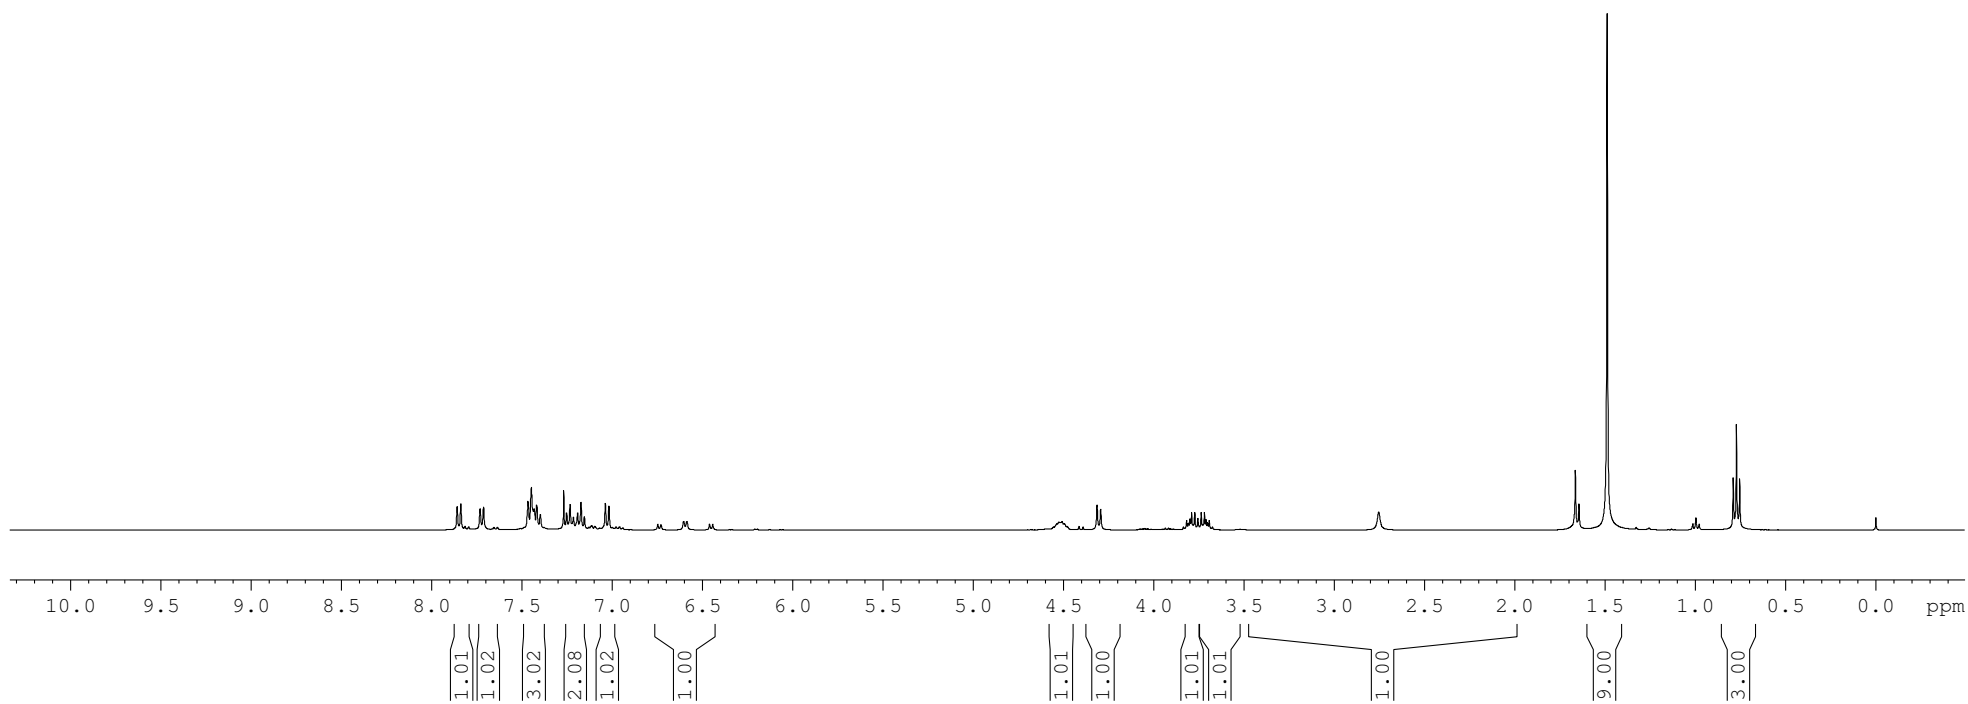

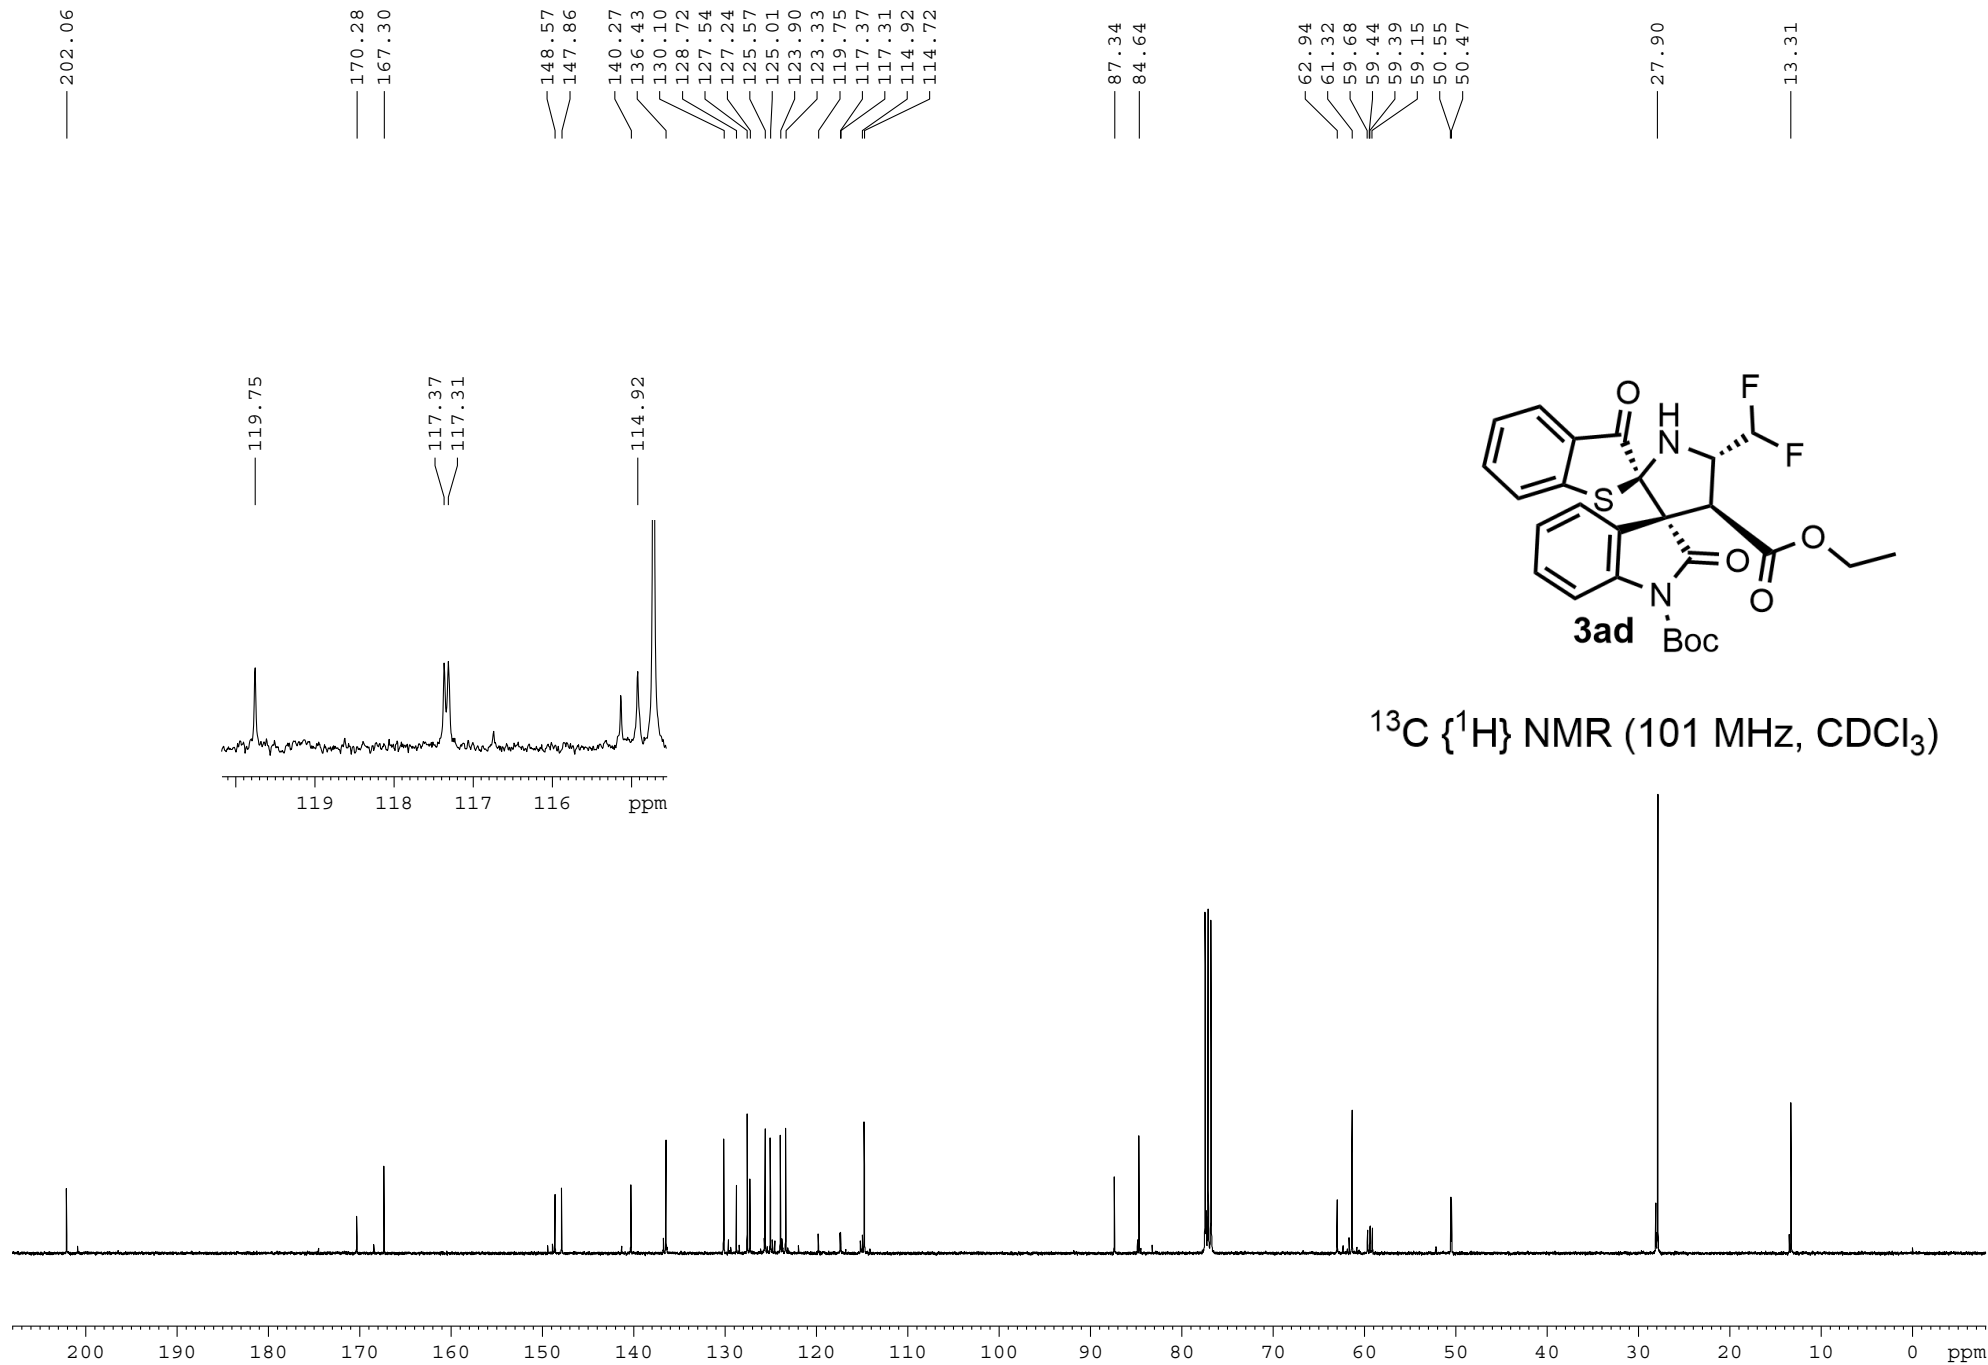

— -118.898

— -119.687

— -122.596

— -123.385

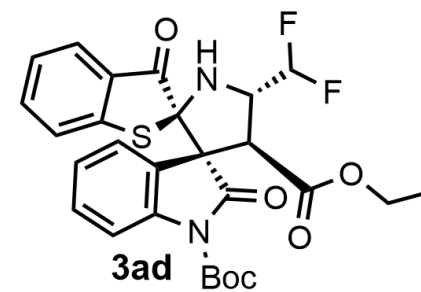

$^{19}\text{F}$  NMR (376 MHz,  $\text{CDCl}_3$ )

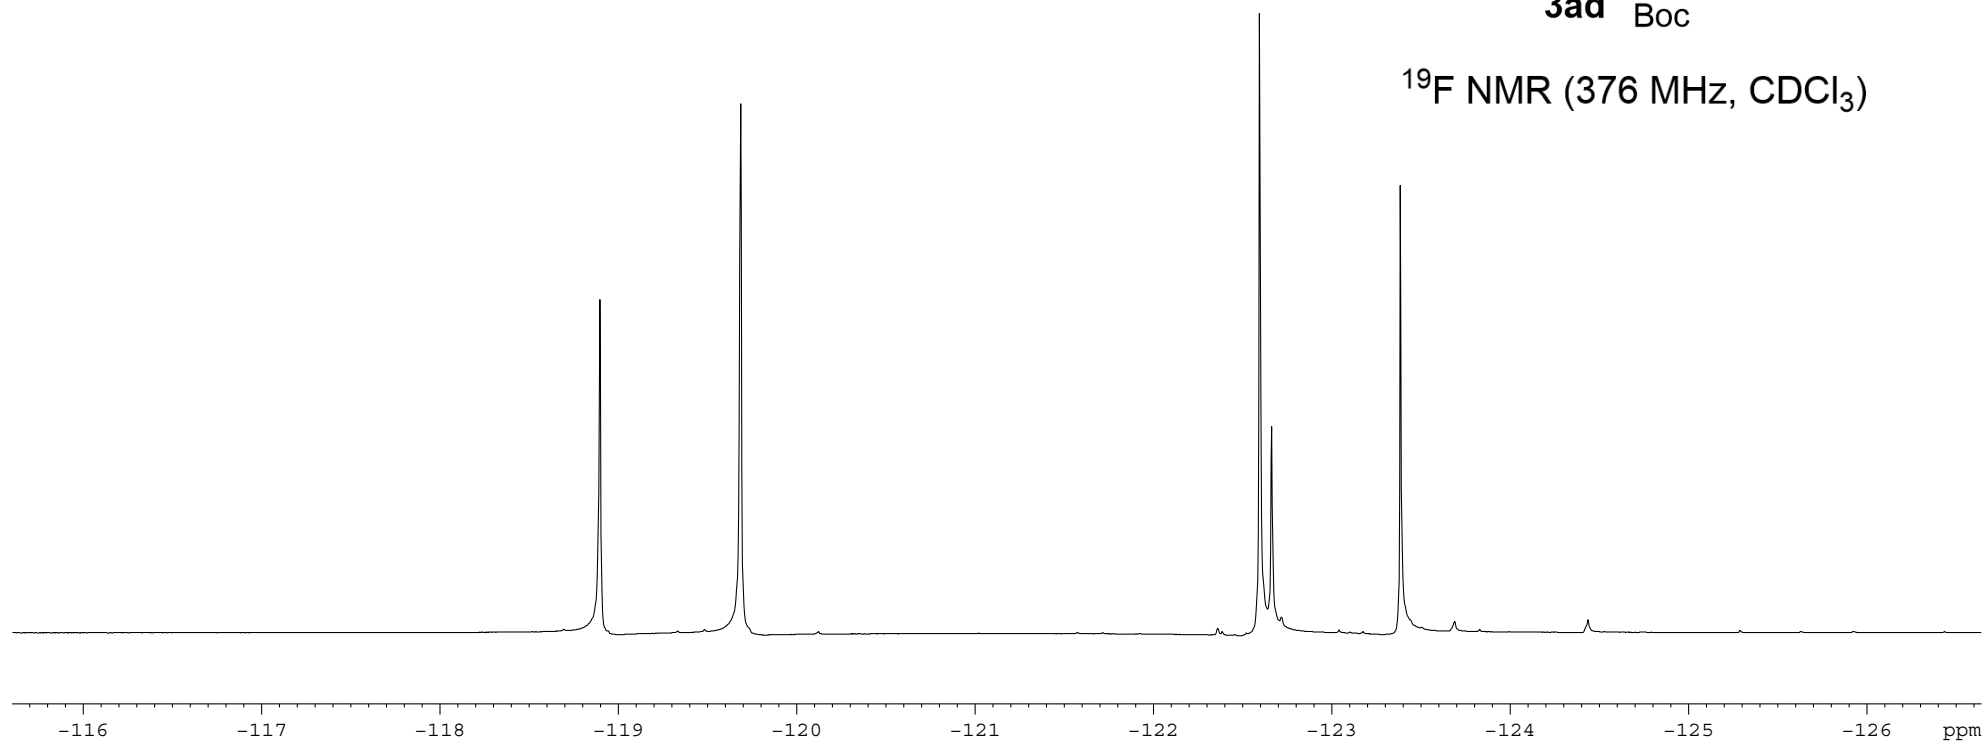



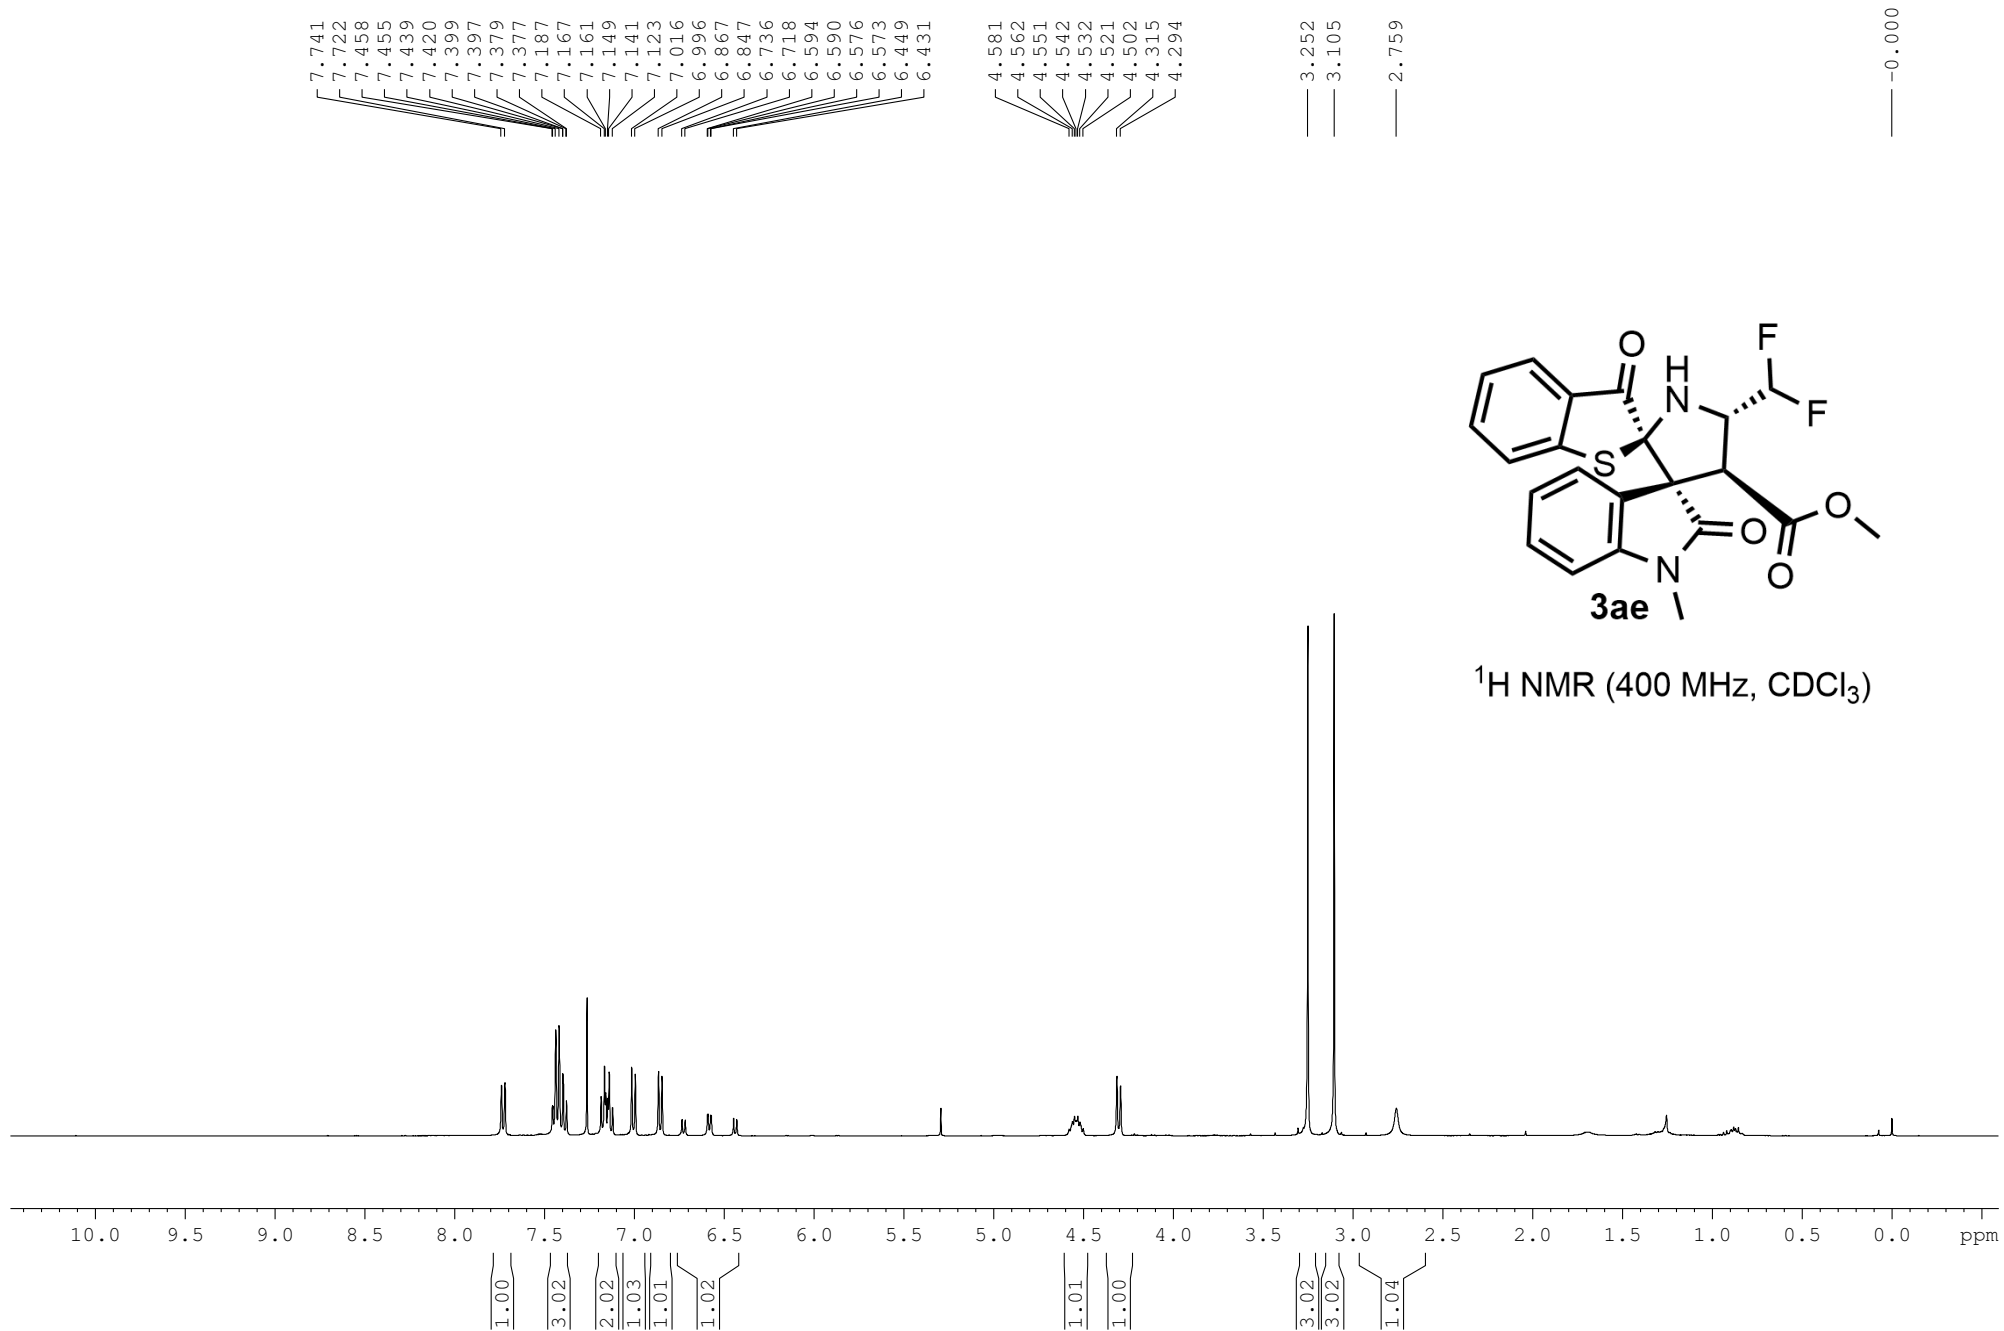

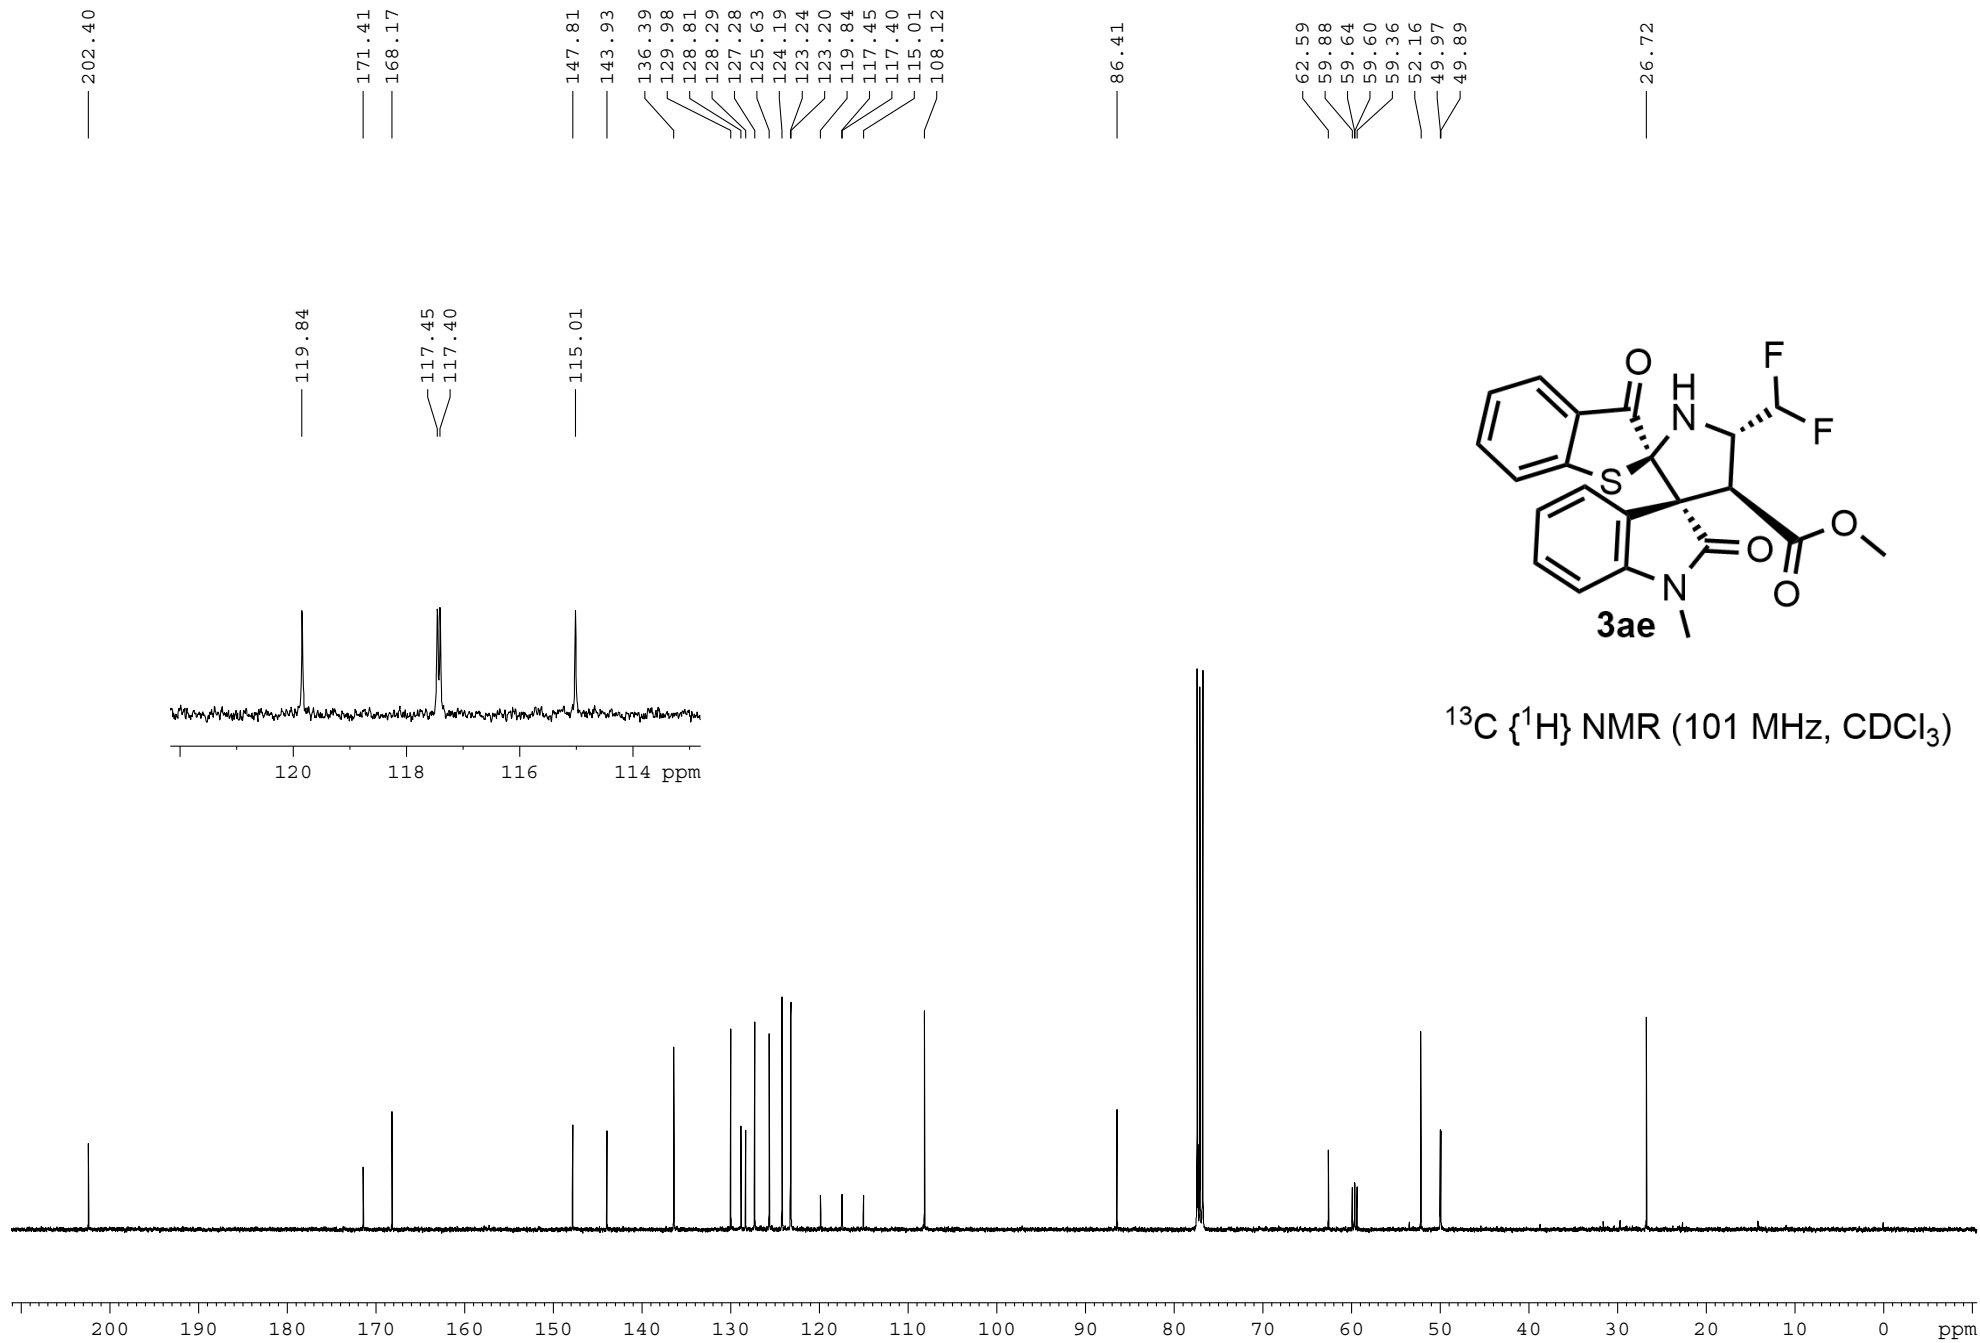

— -118.886

— -119.674

— -122.627

— -123.414

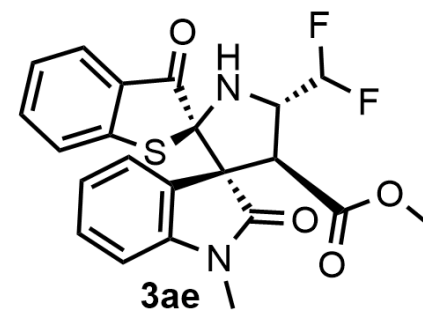

<sup>19</sup>F NMR (376 MHz, CDCl<sub>3</sub>)

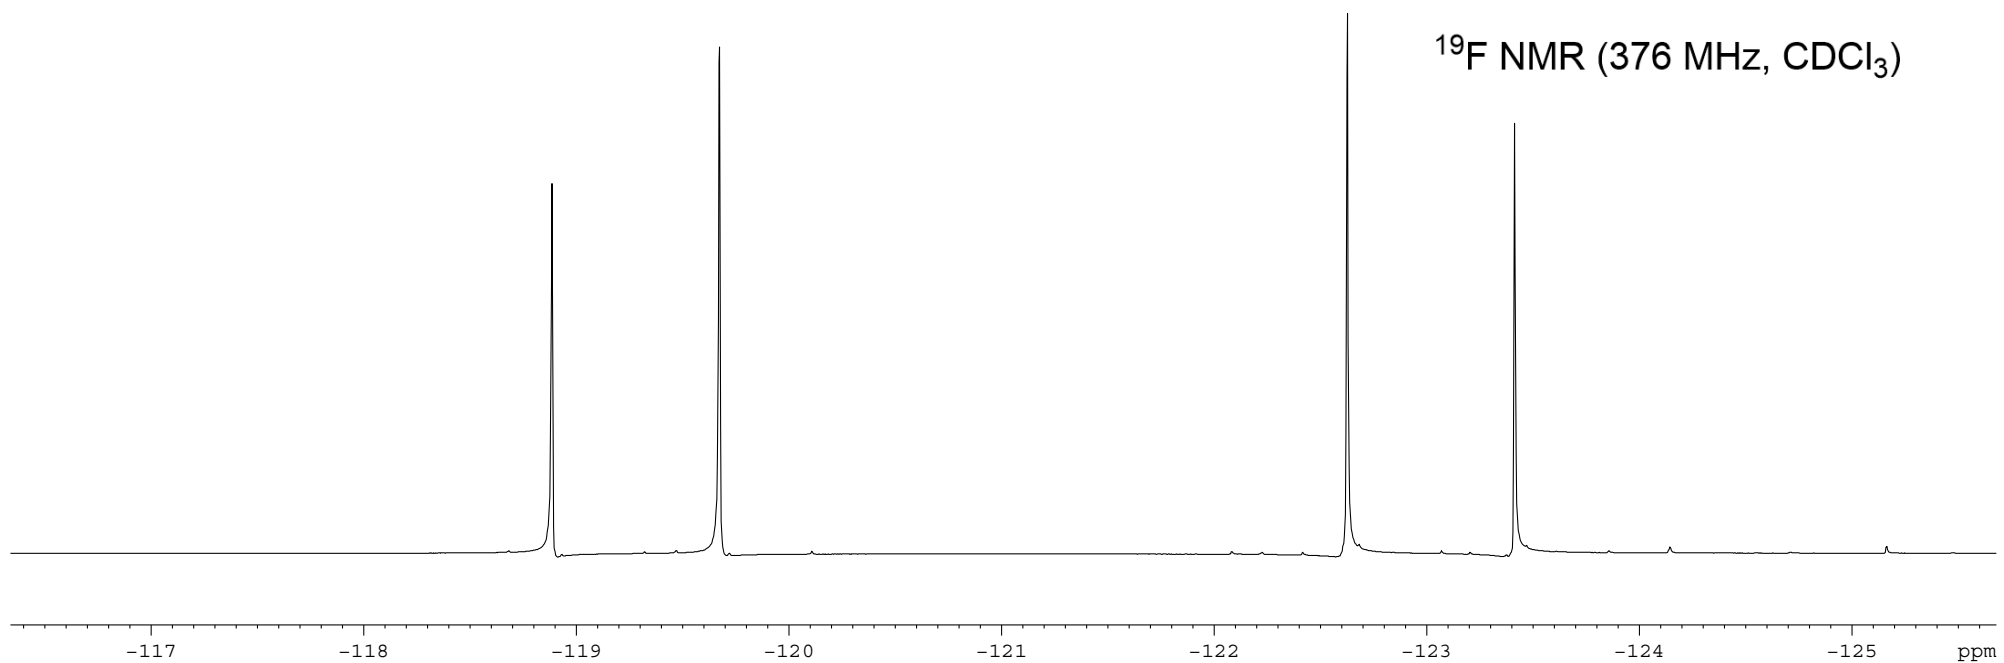

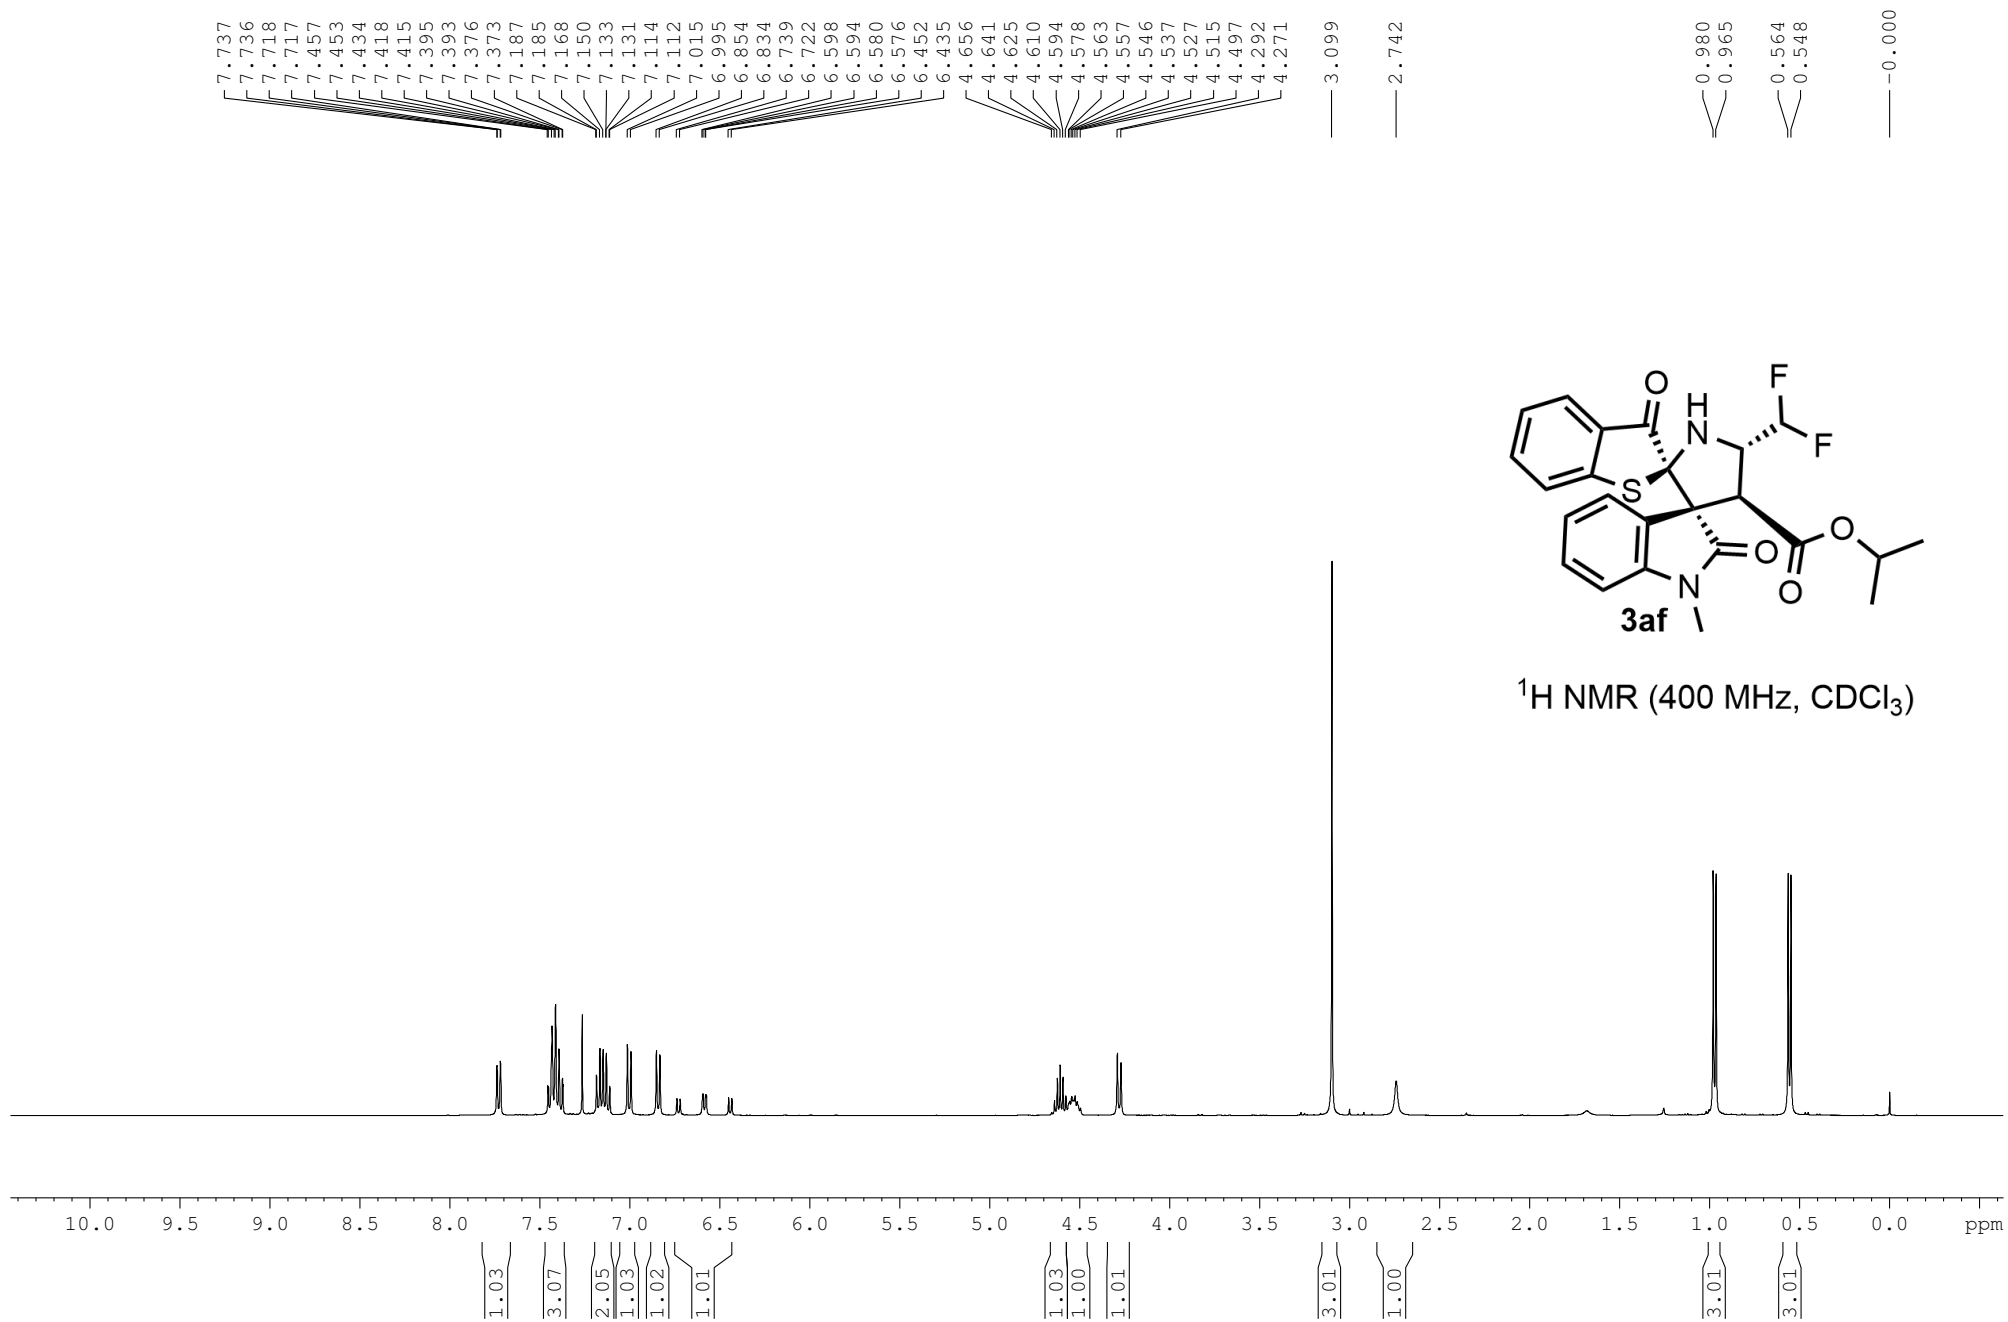

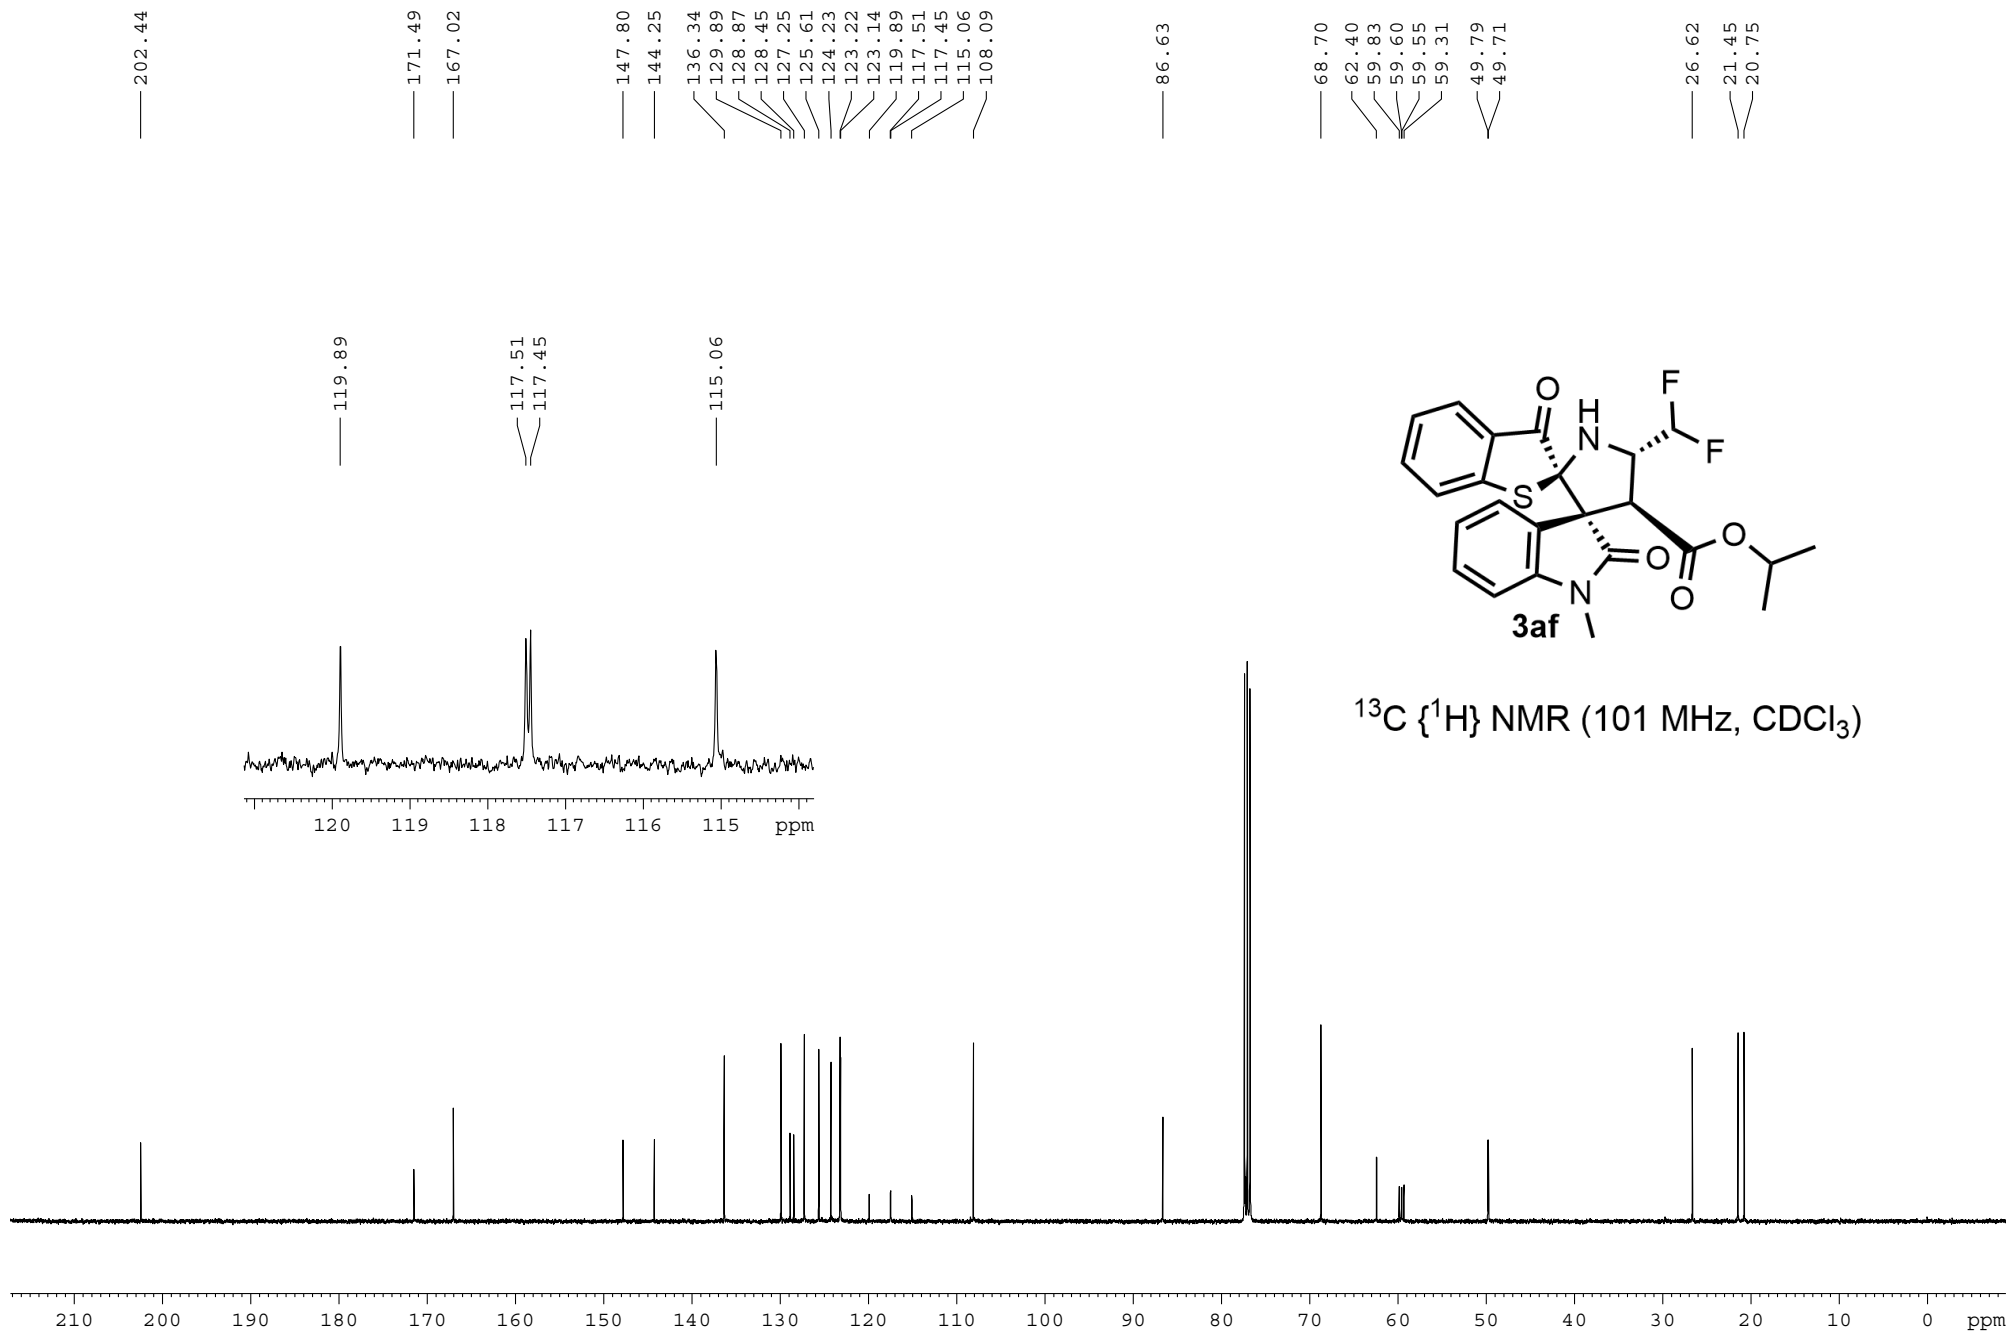

-118.916

-119.703

-122.603

-123.389

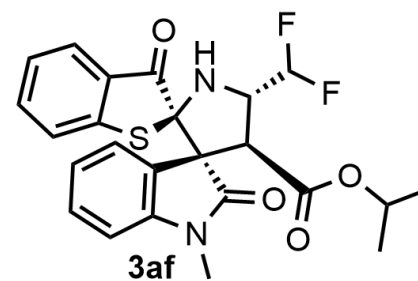

$^{19}\text{F}$  NMR (376 MHz,  $\text{CDCl}_3$ )

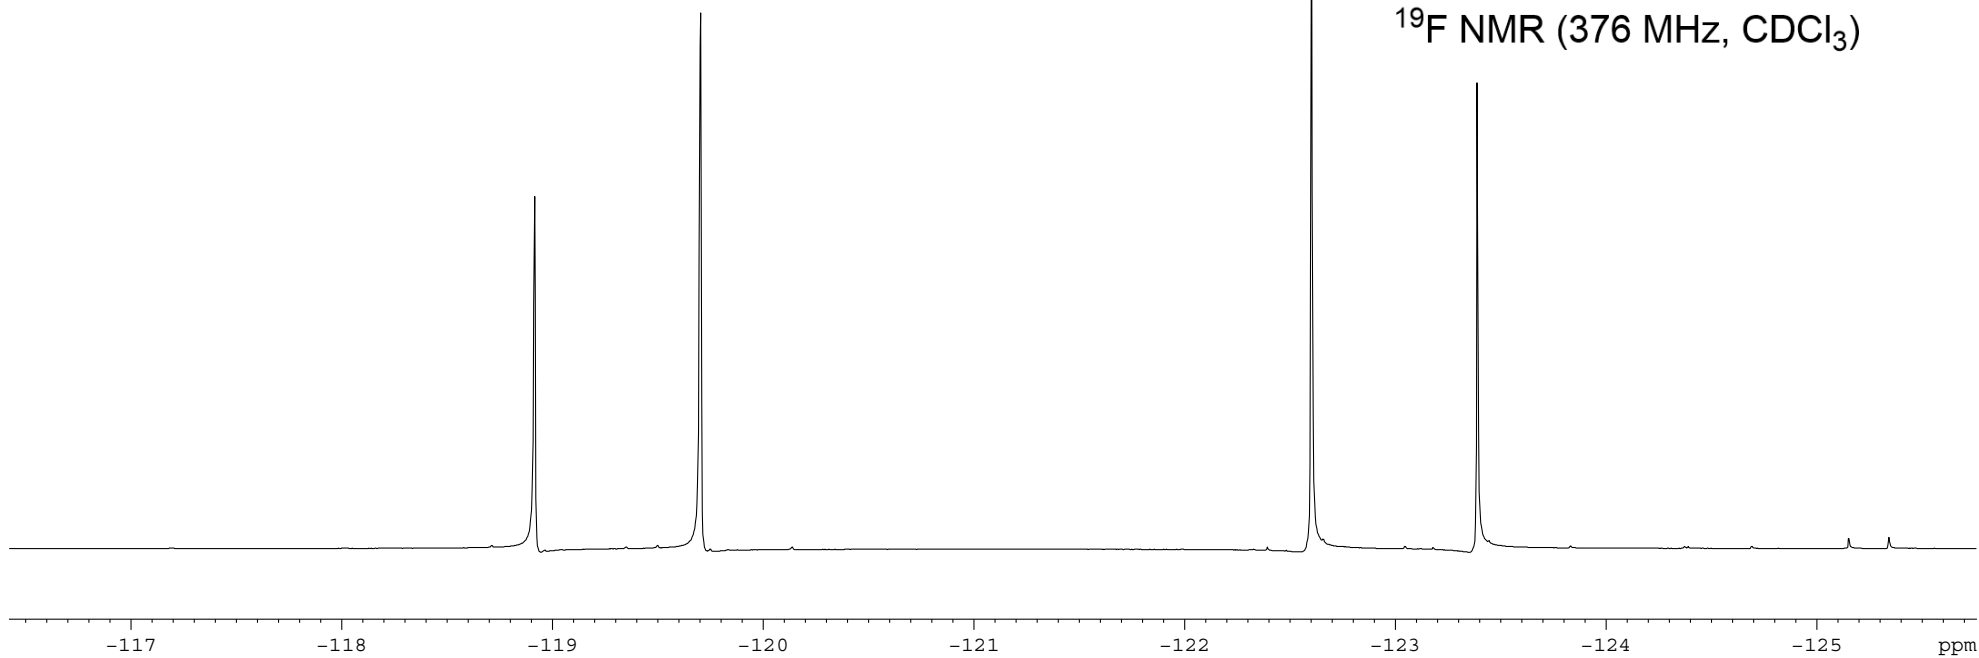

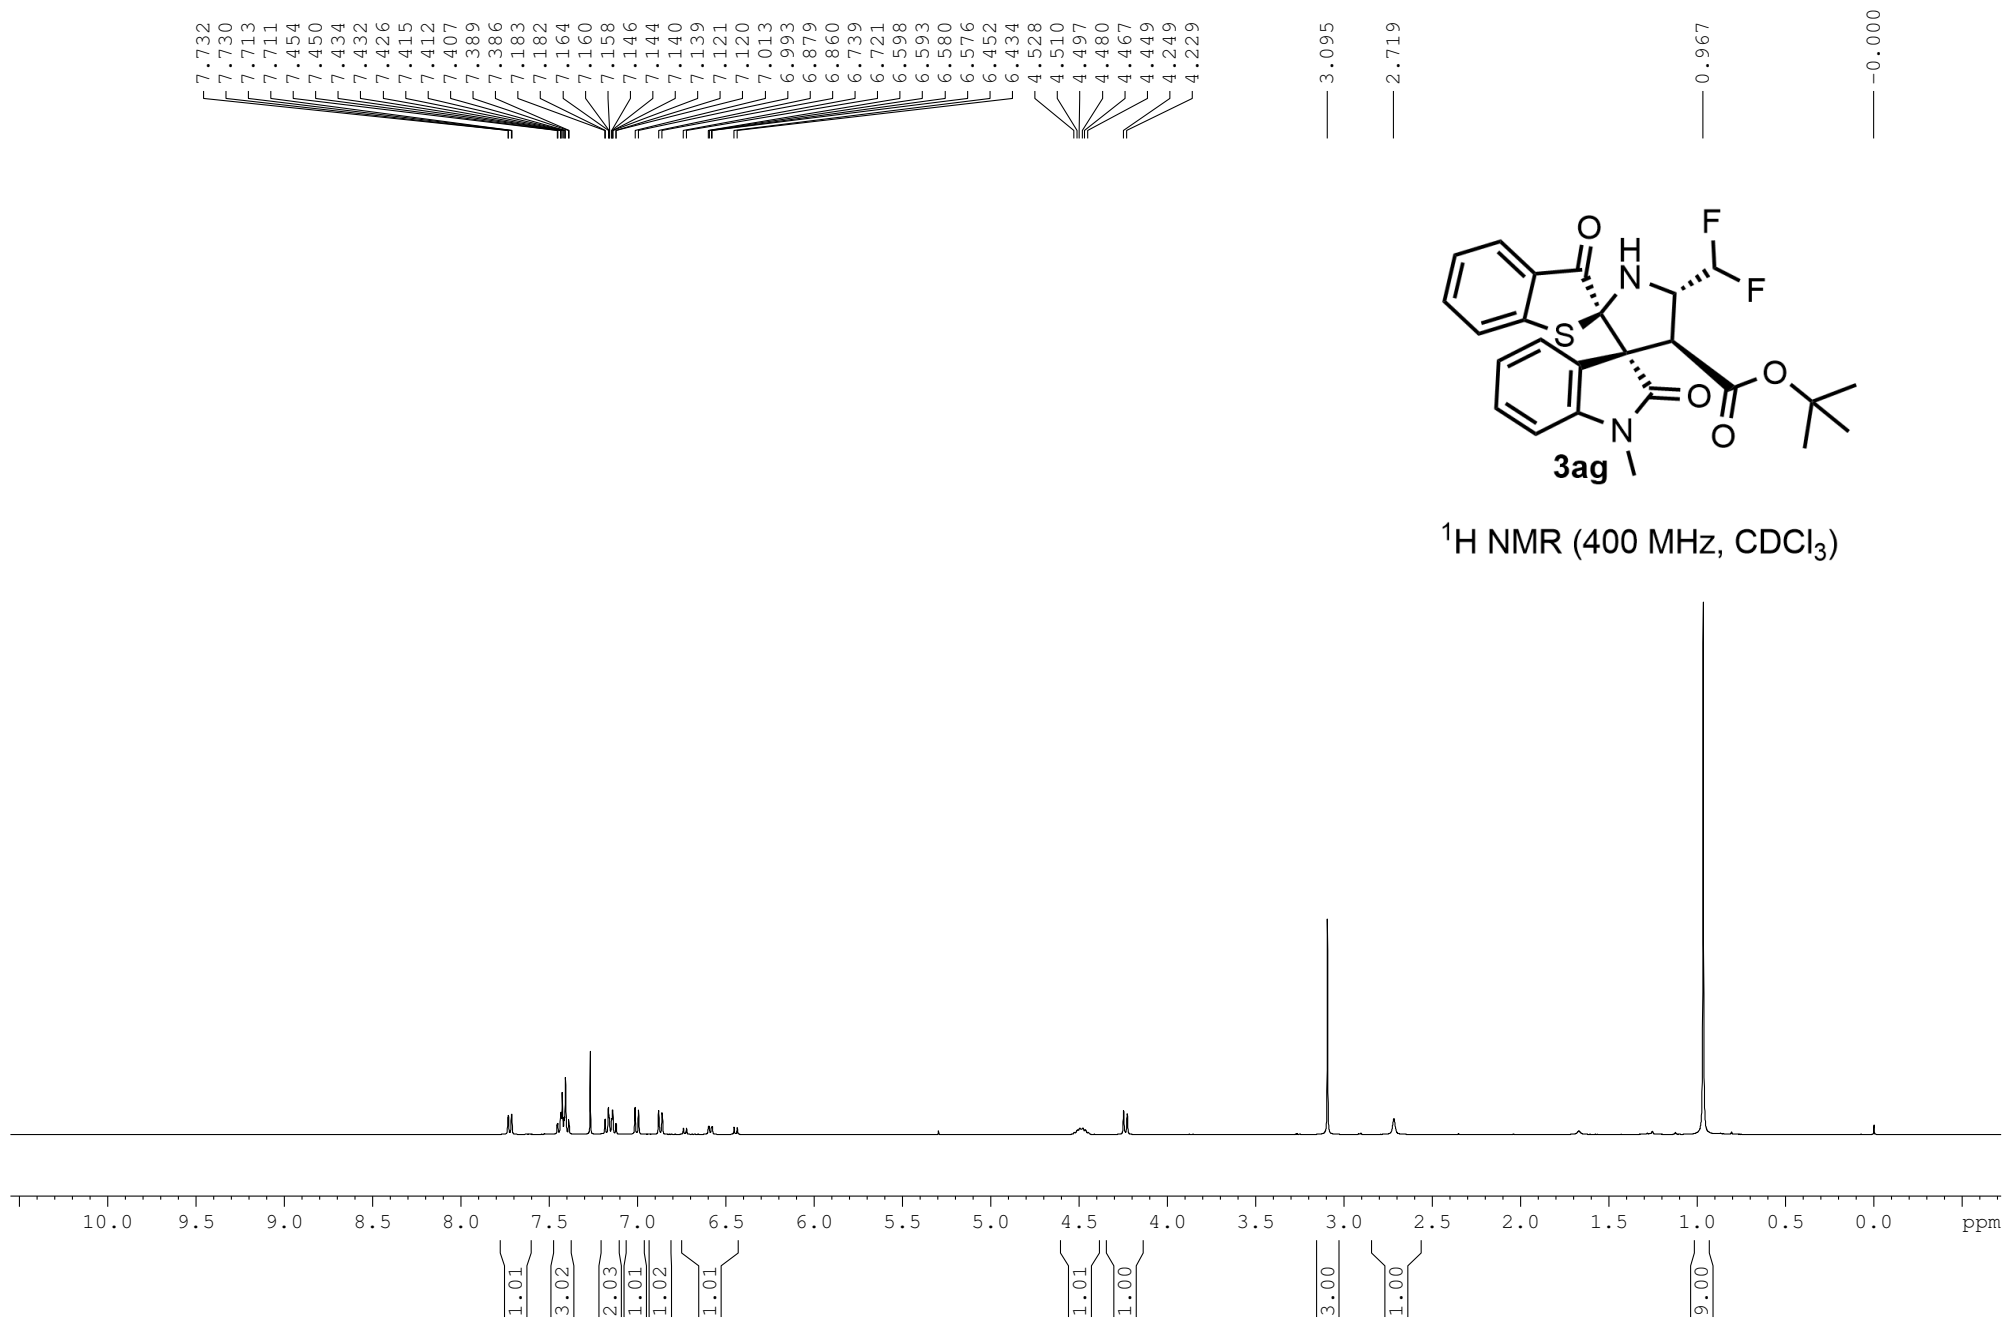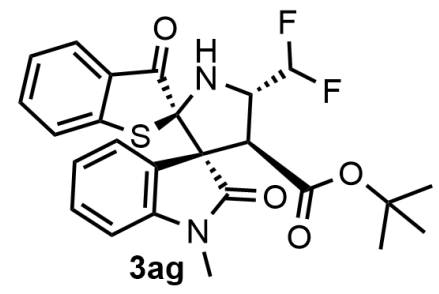

<sup>1</sup>H NMR (400 MHz, CDCl<sub>3</sub>)

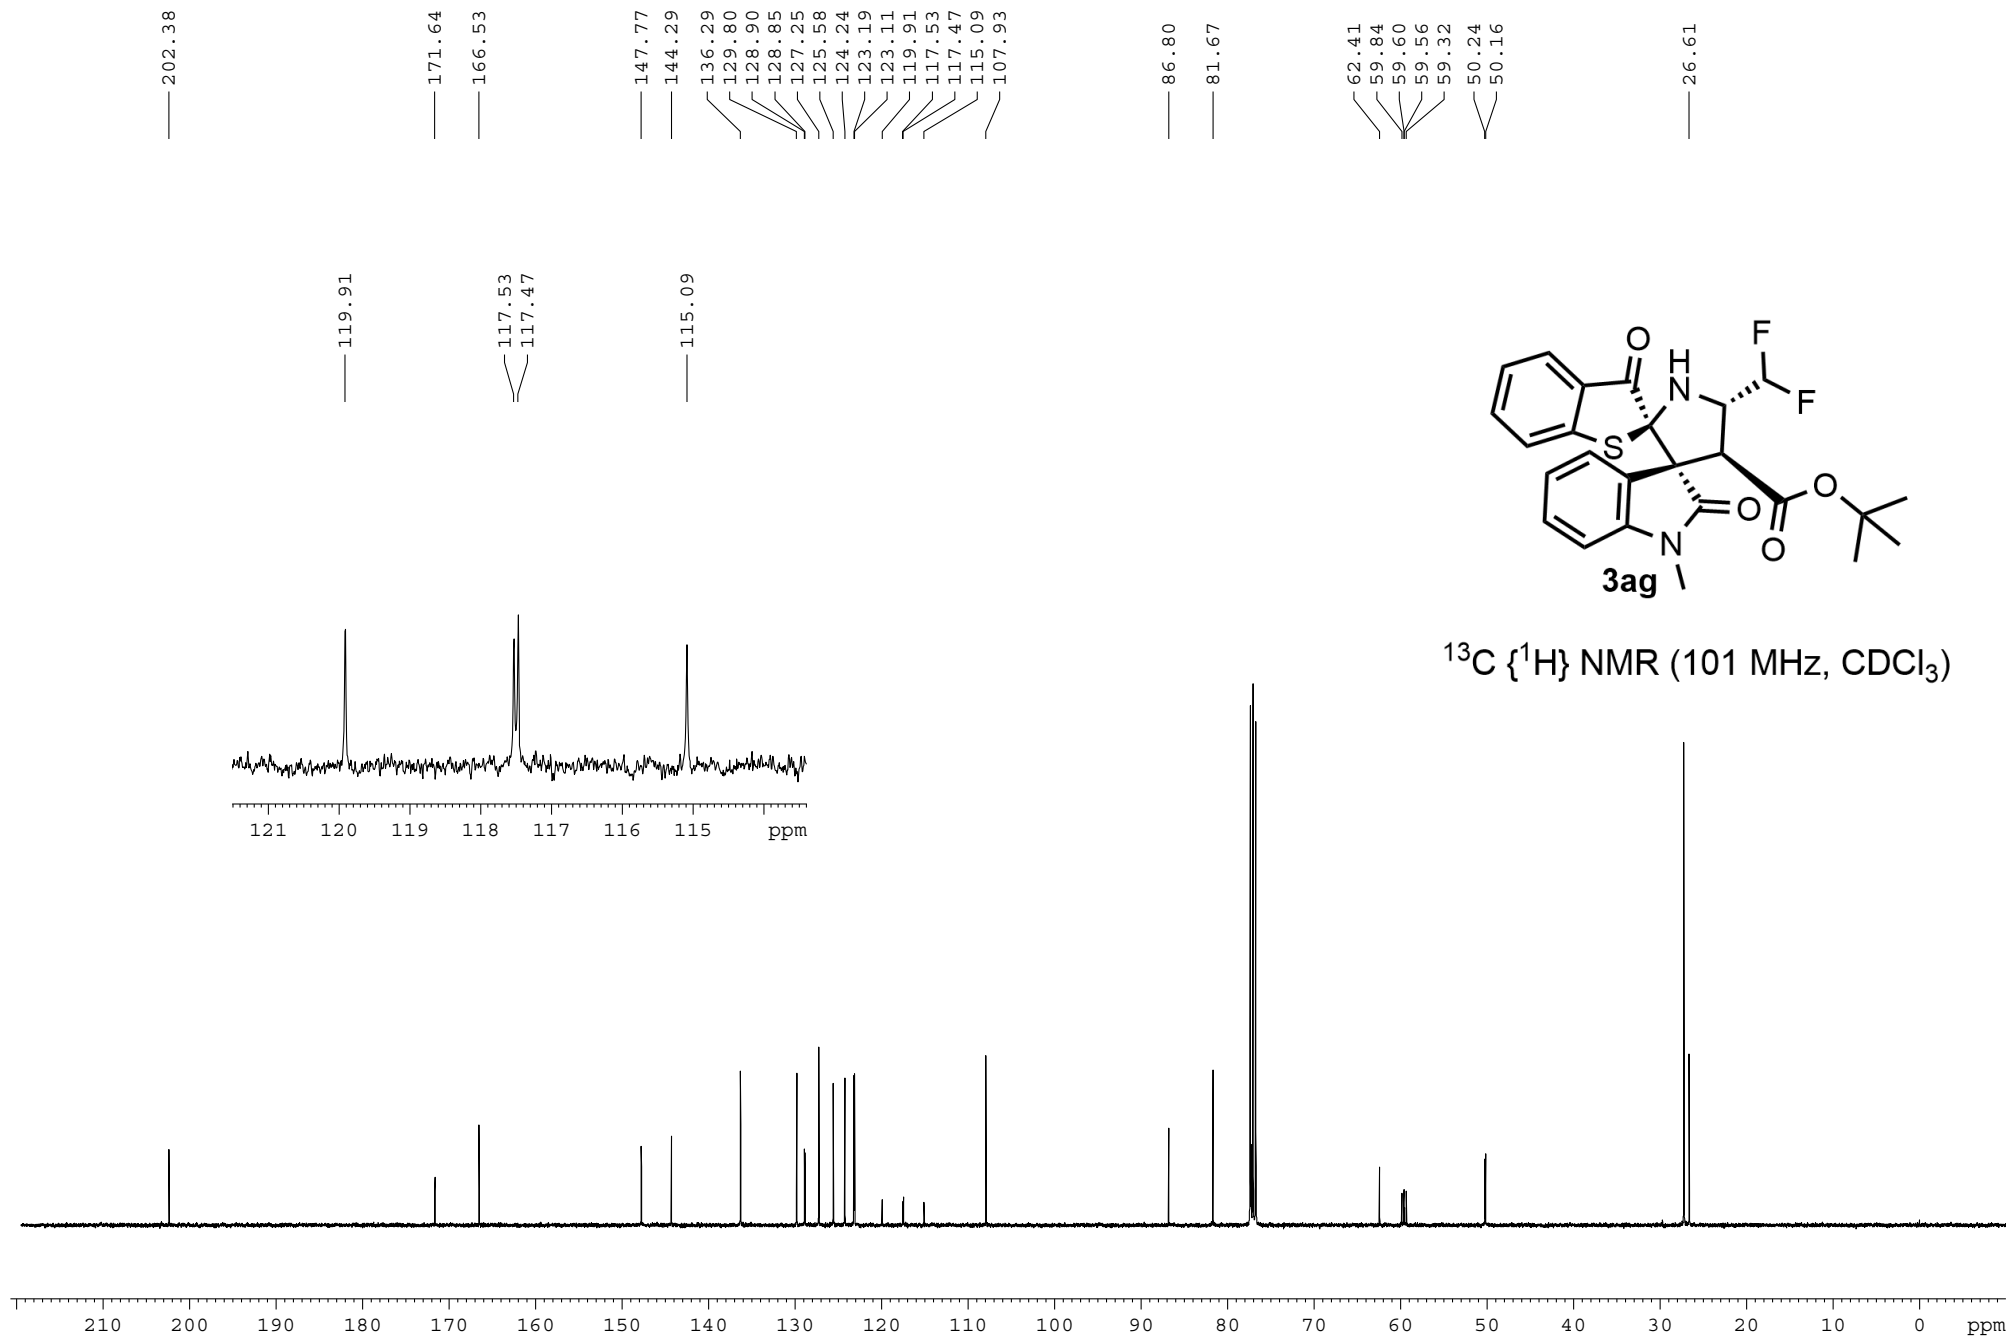



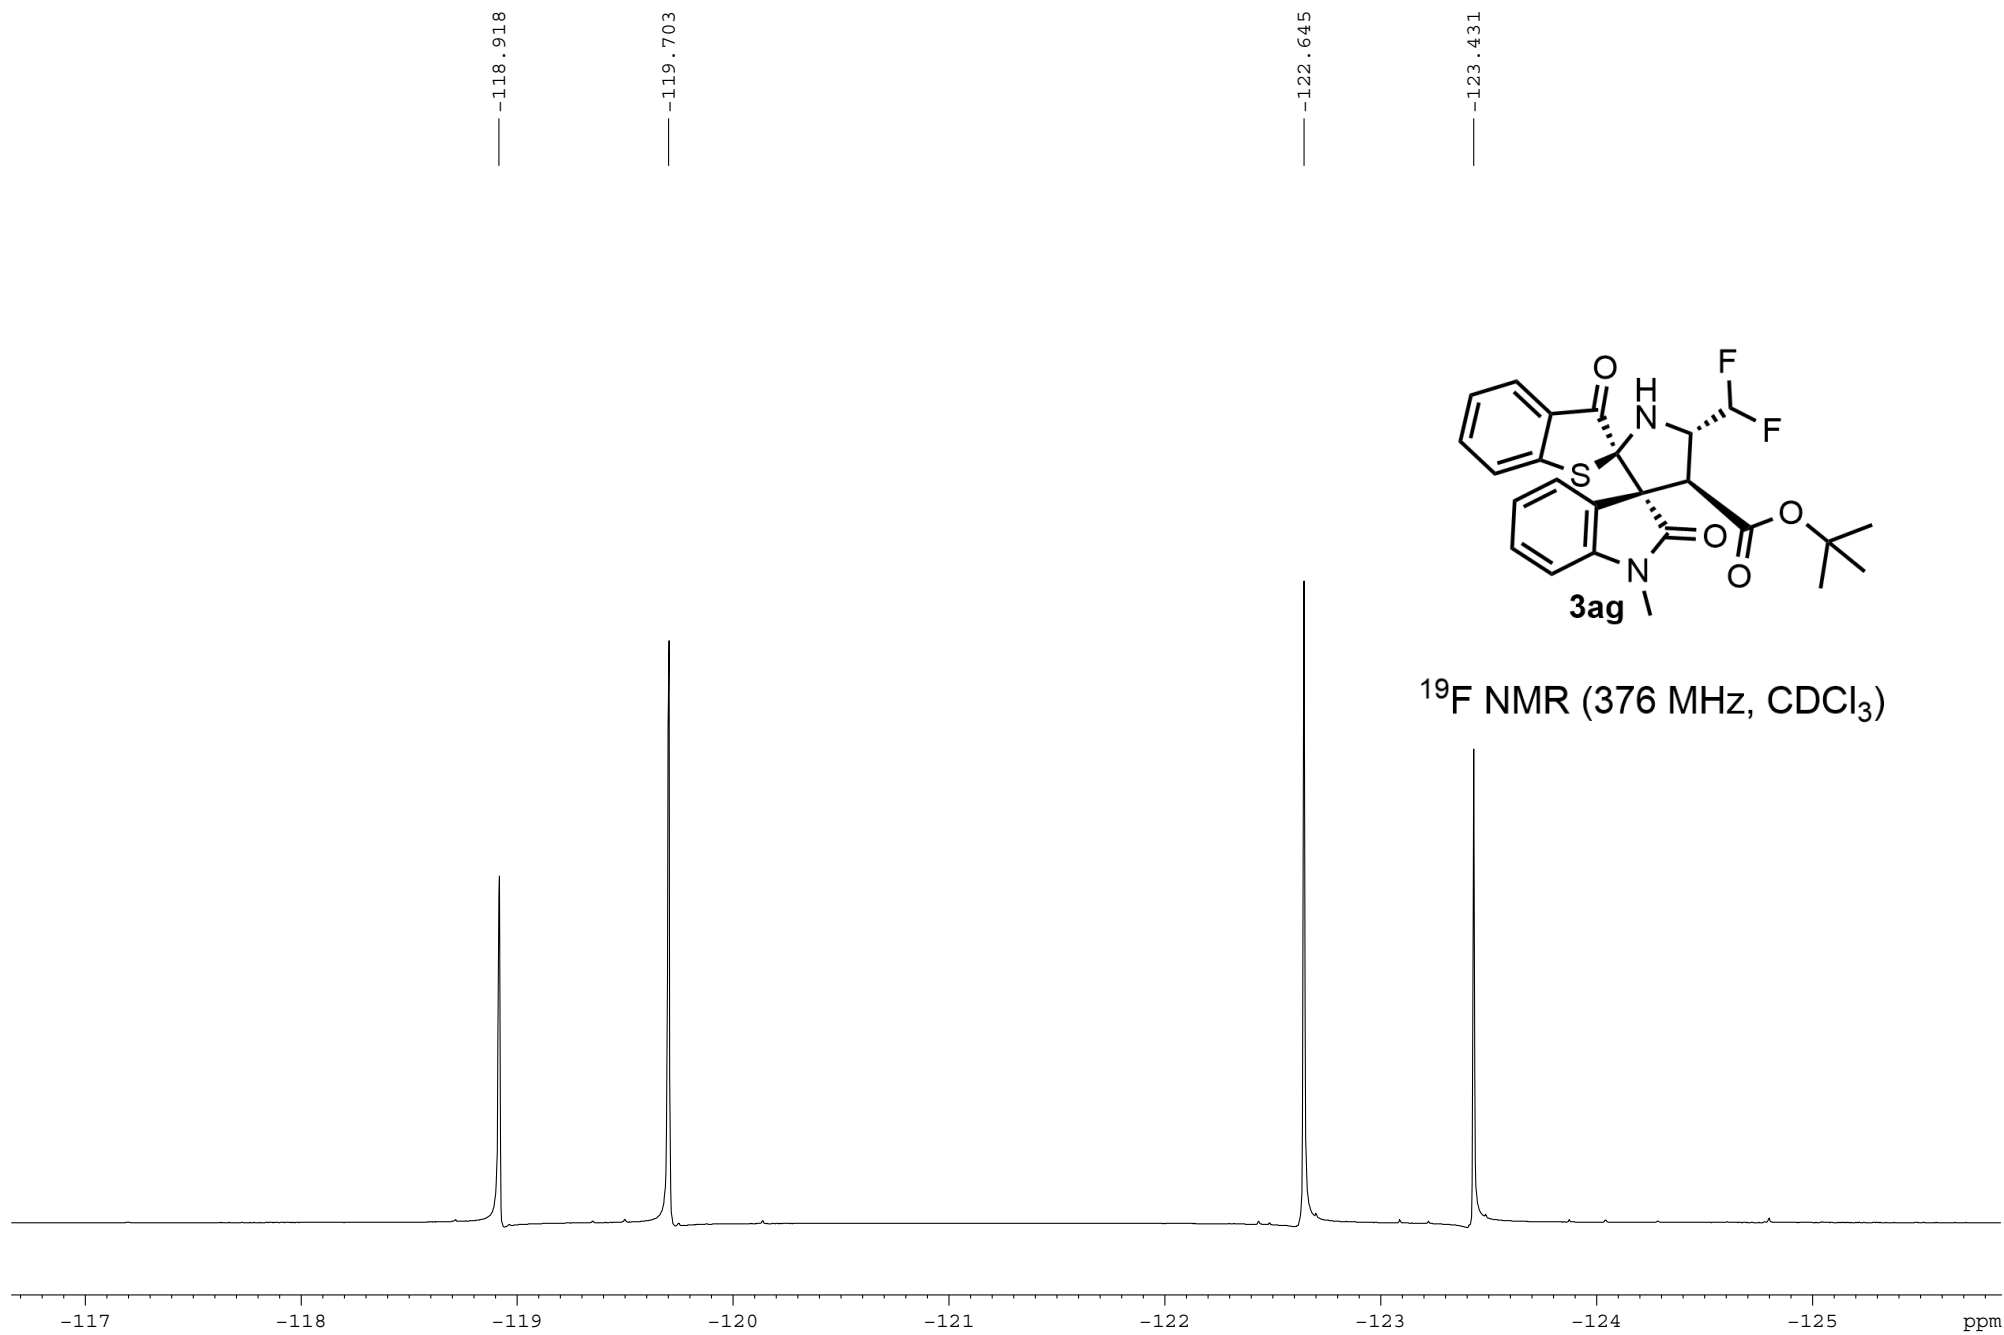

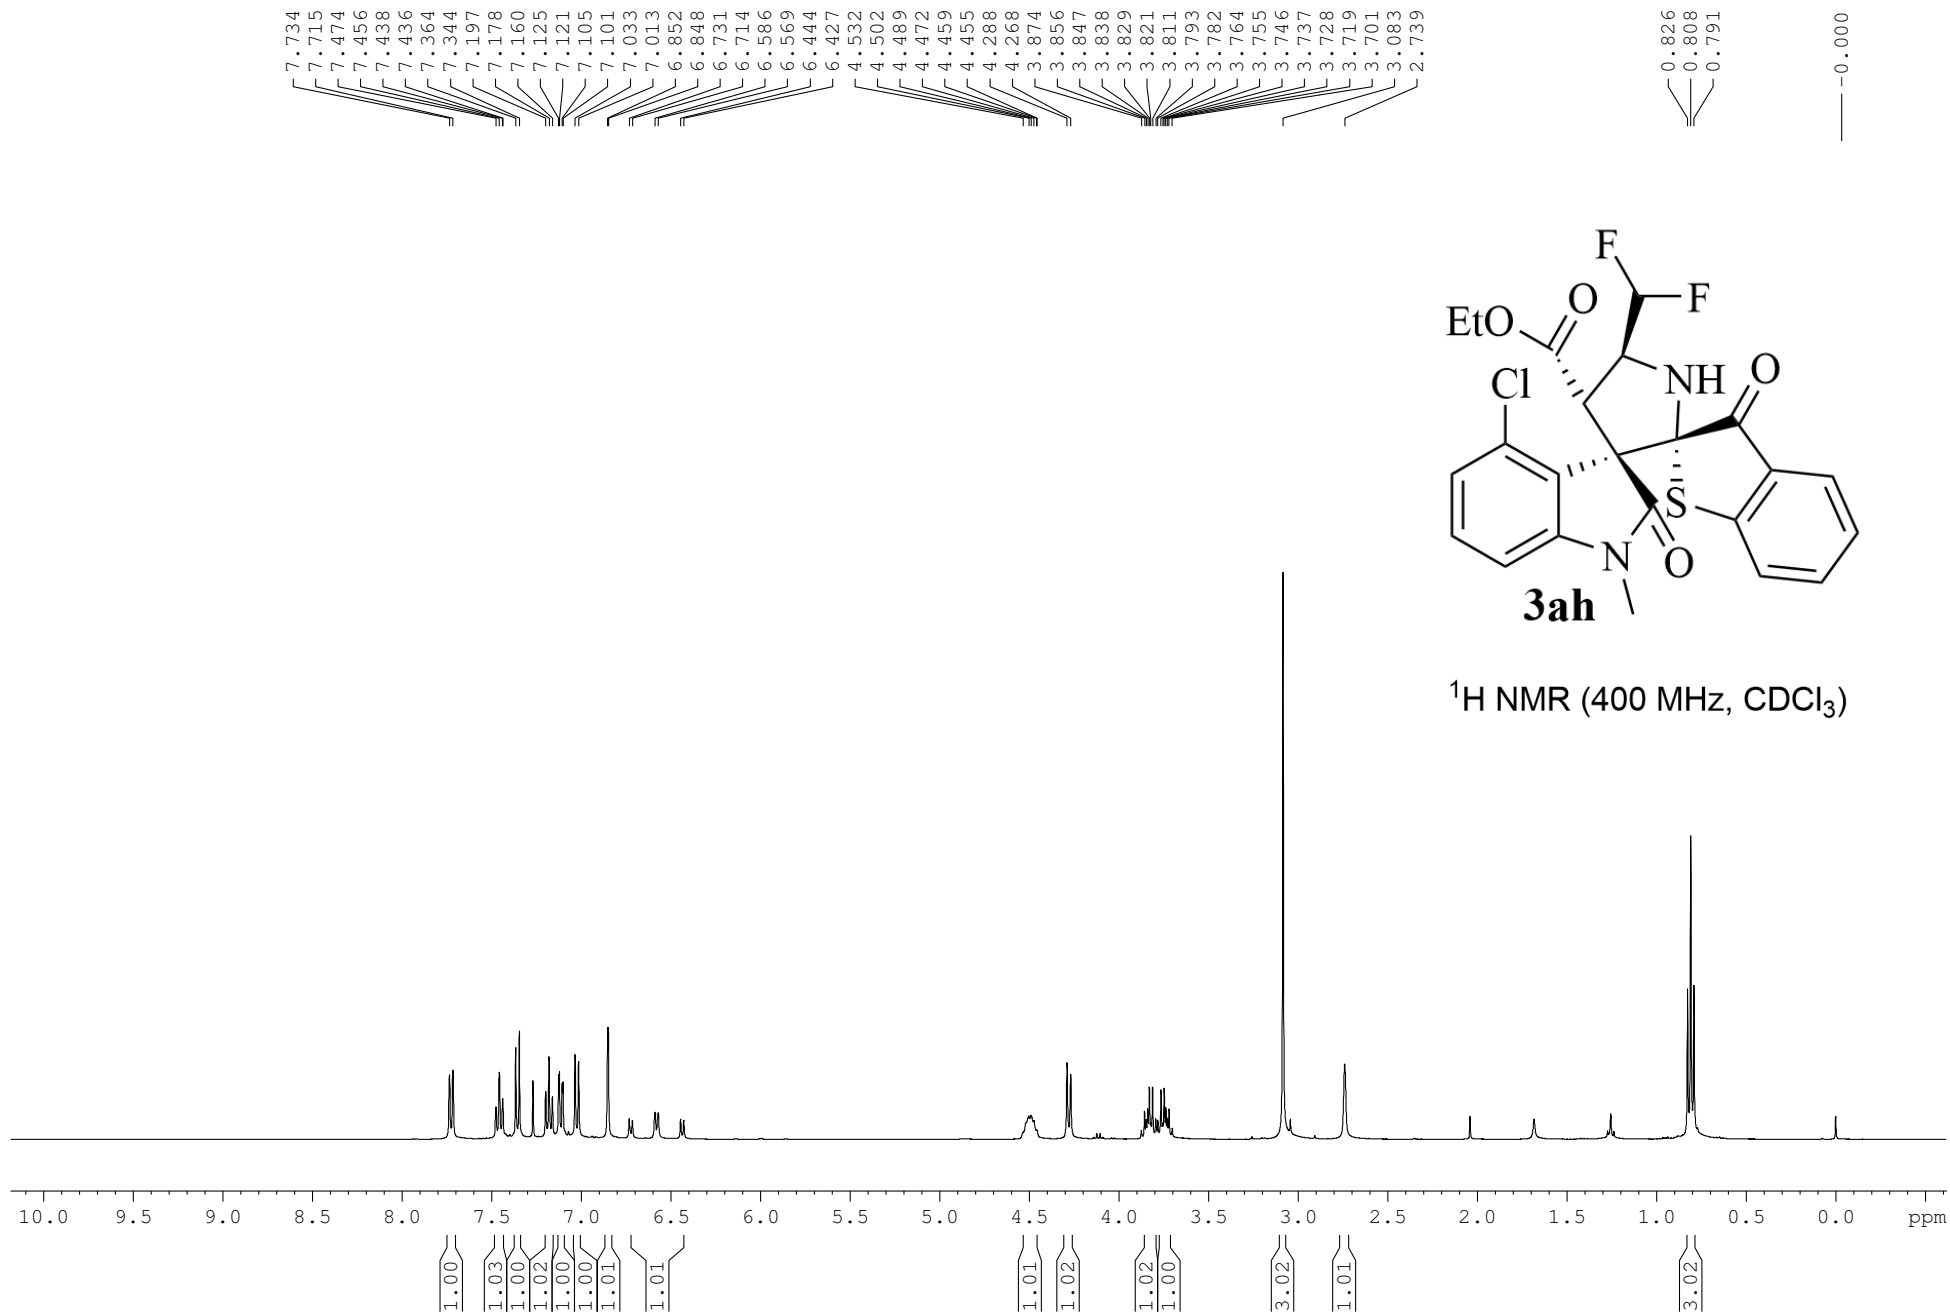

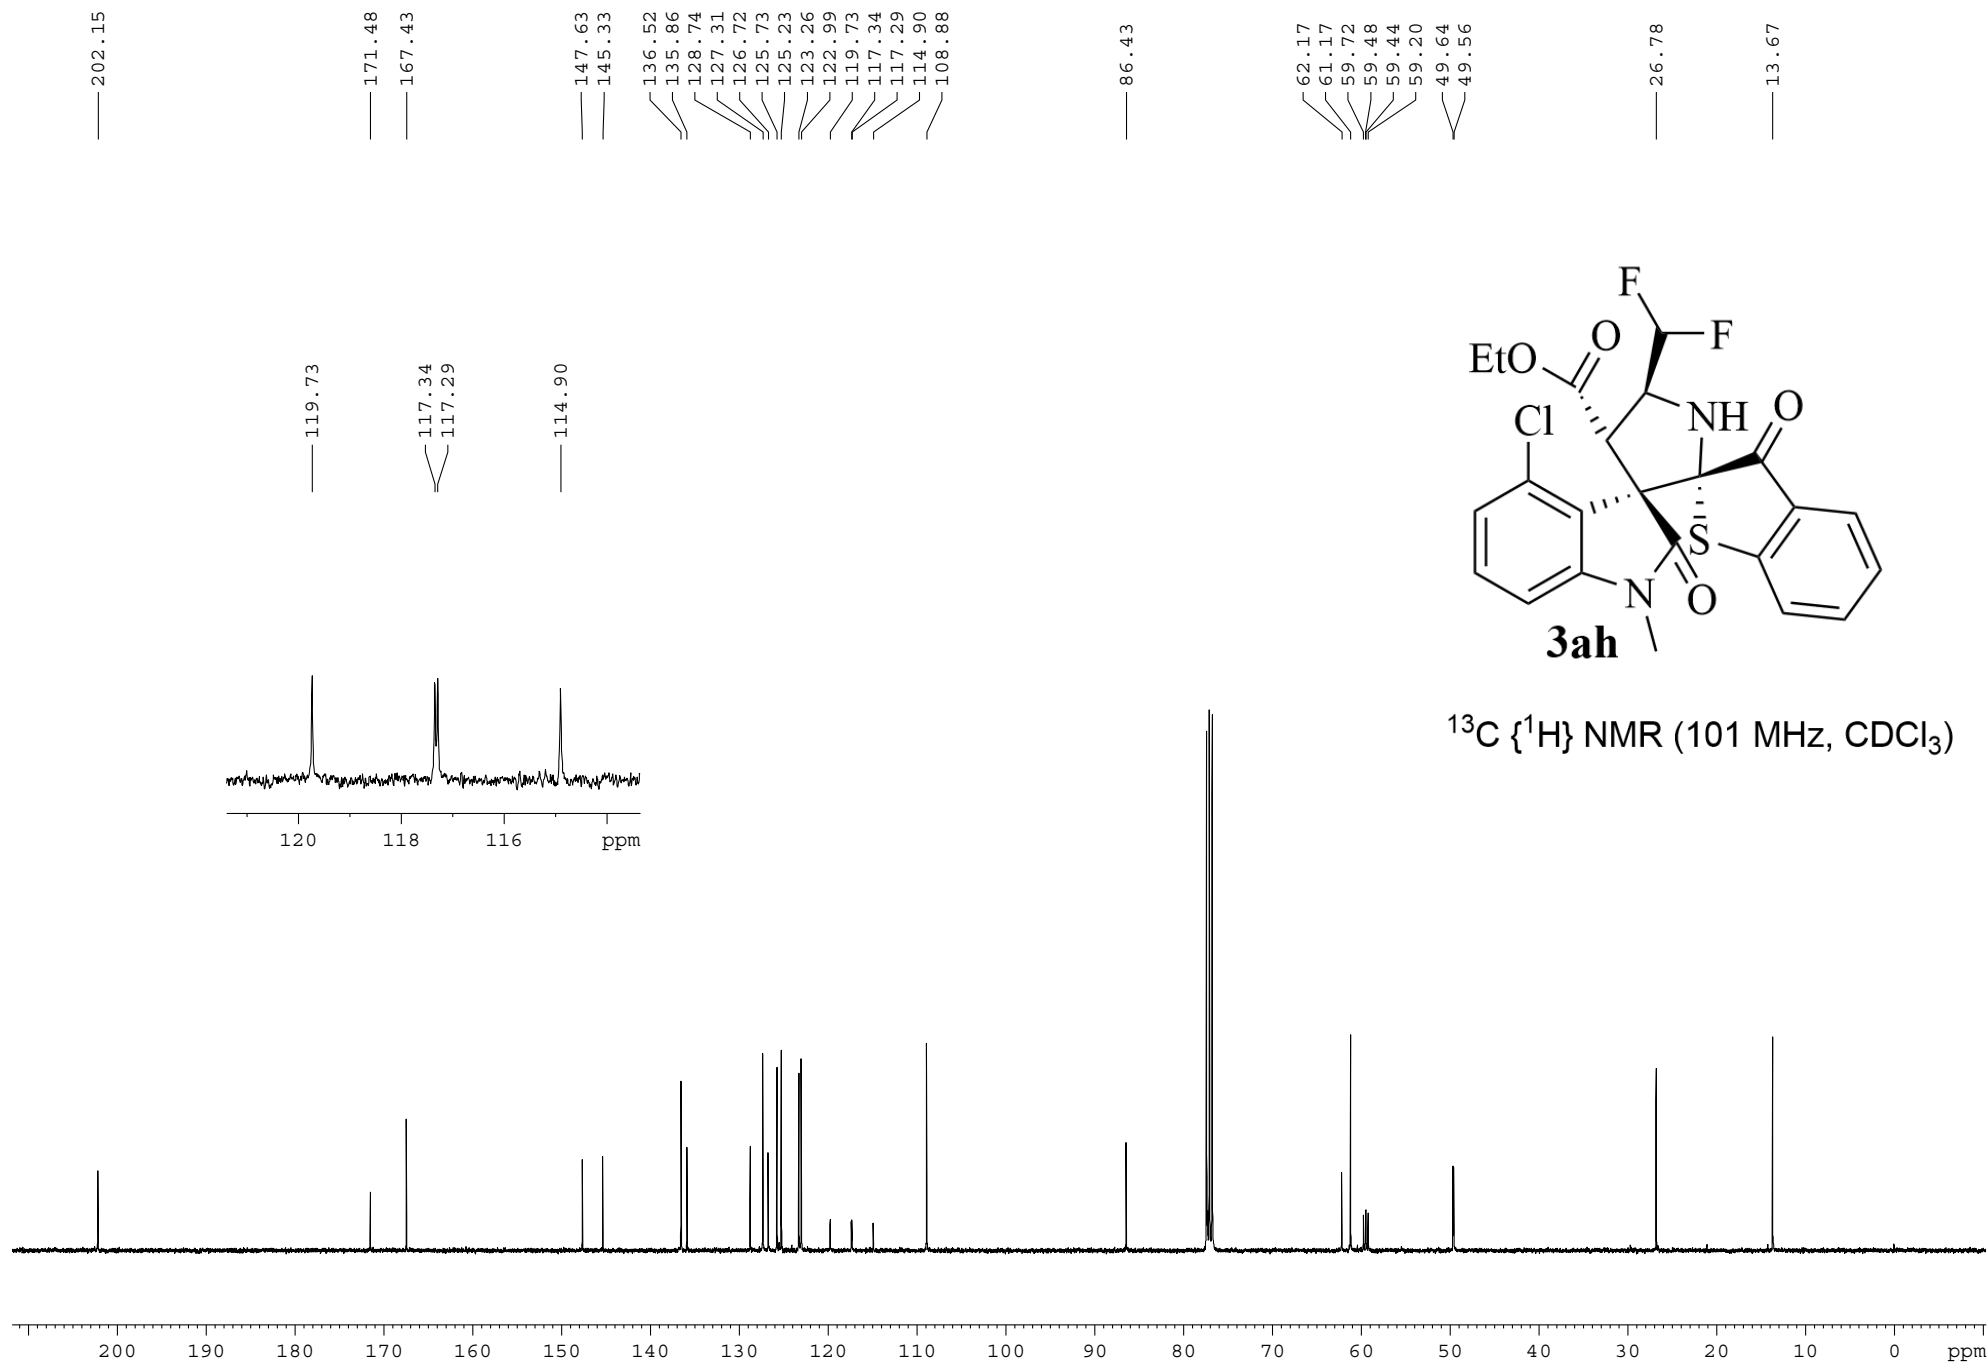

— -118.889

— -119.678

— -122.519

— -123.309

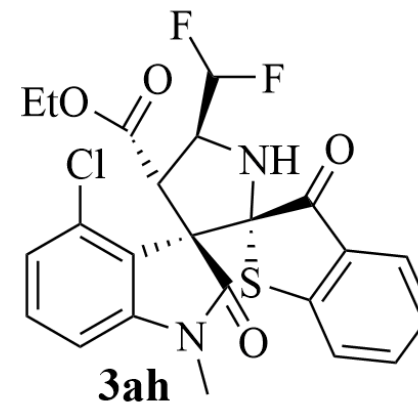

<sup>19</sup>F NMR (376 MHz, CDCl<sub>3</sub>)

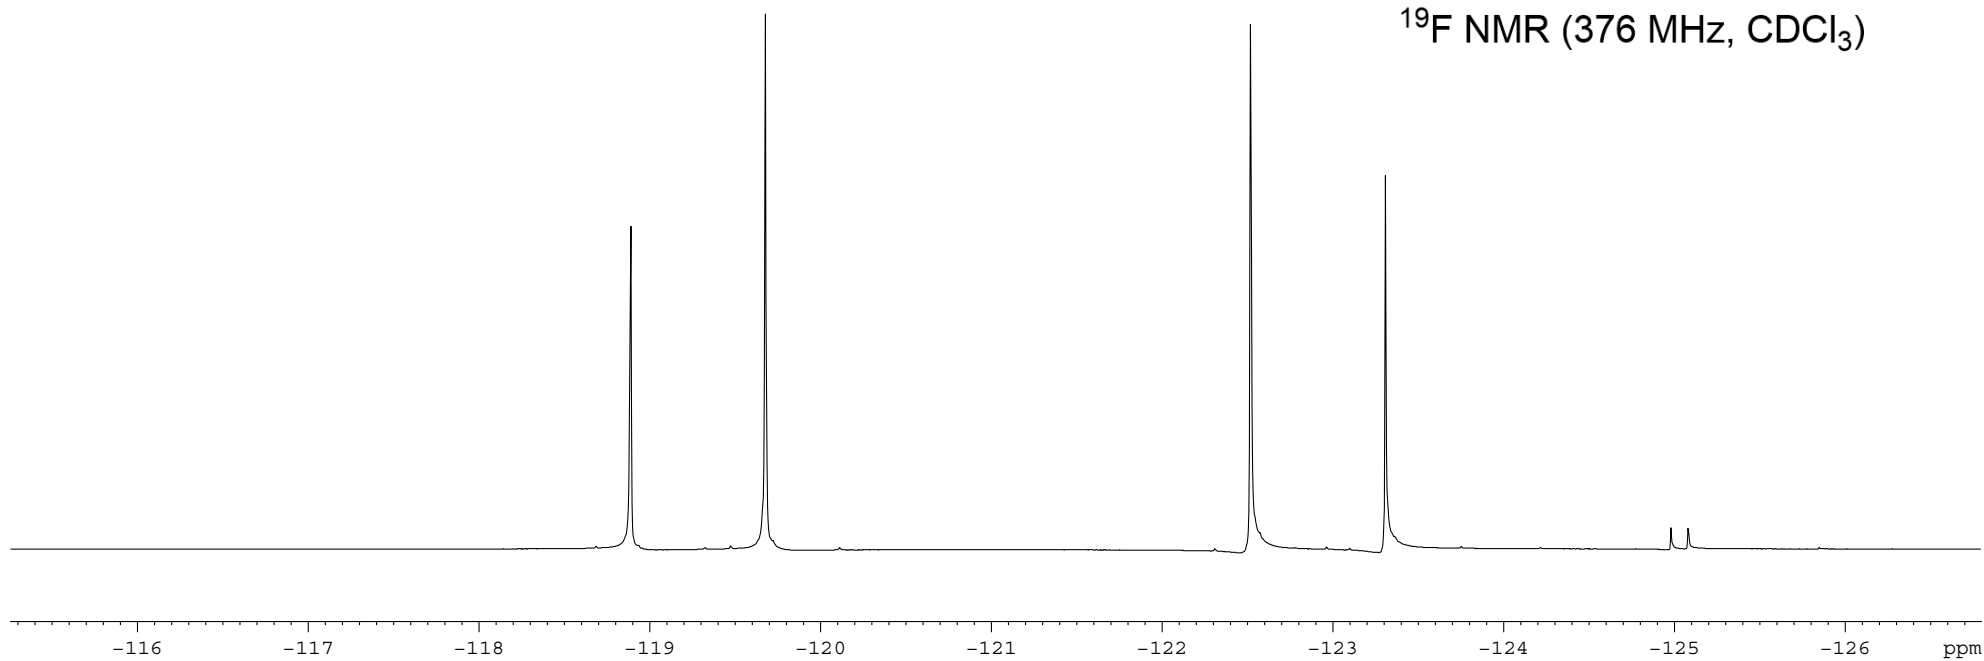

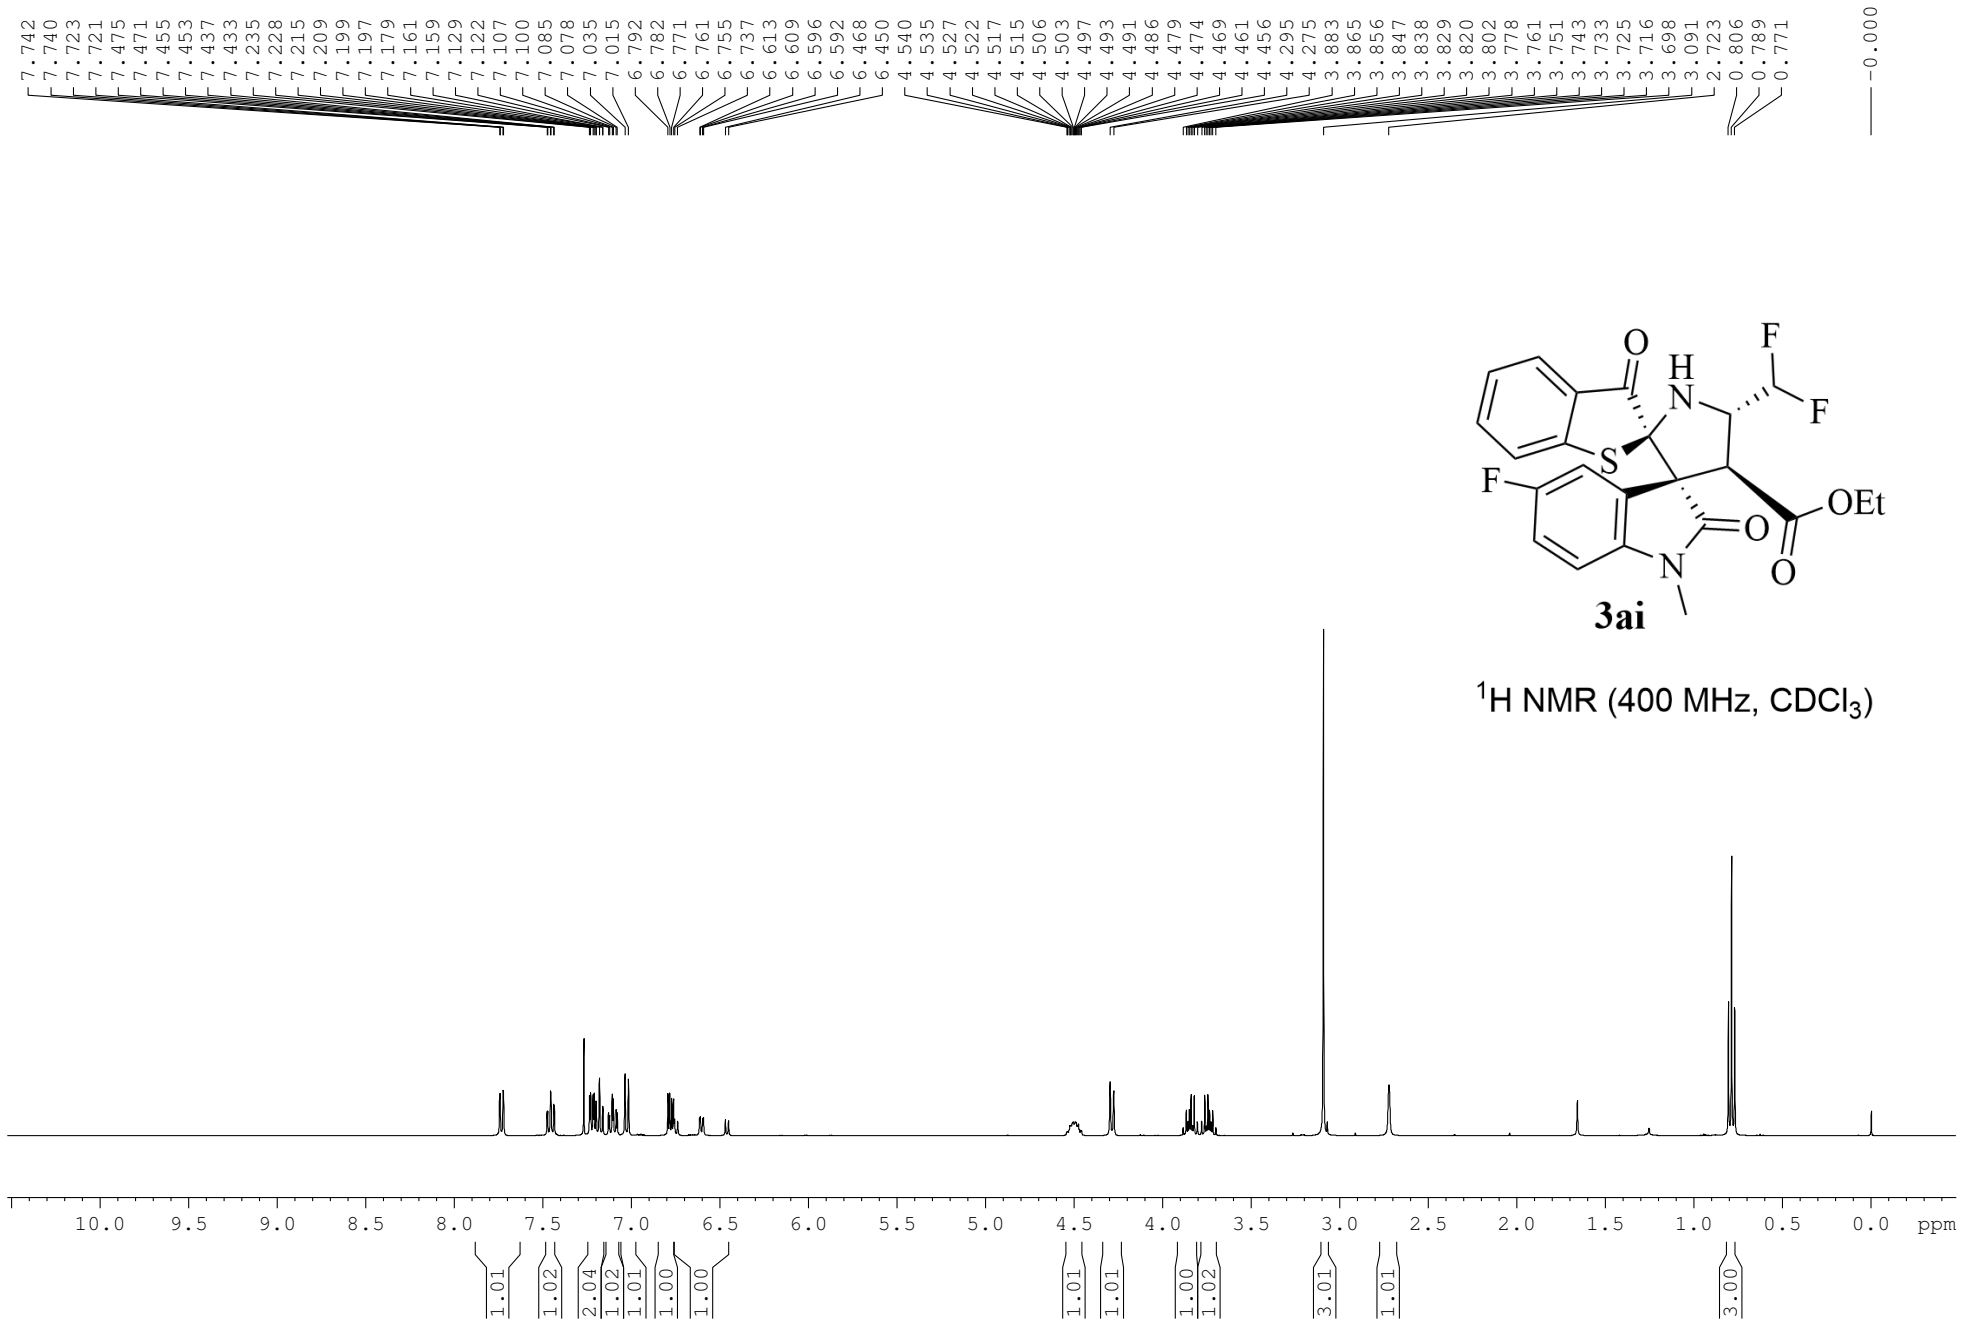

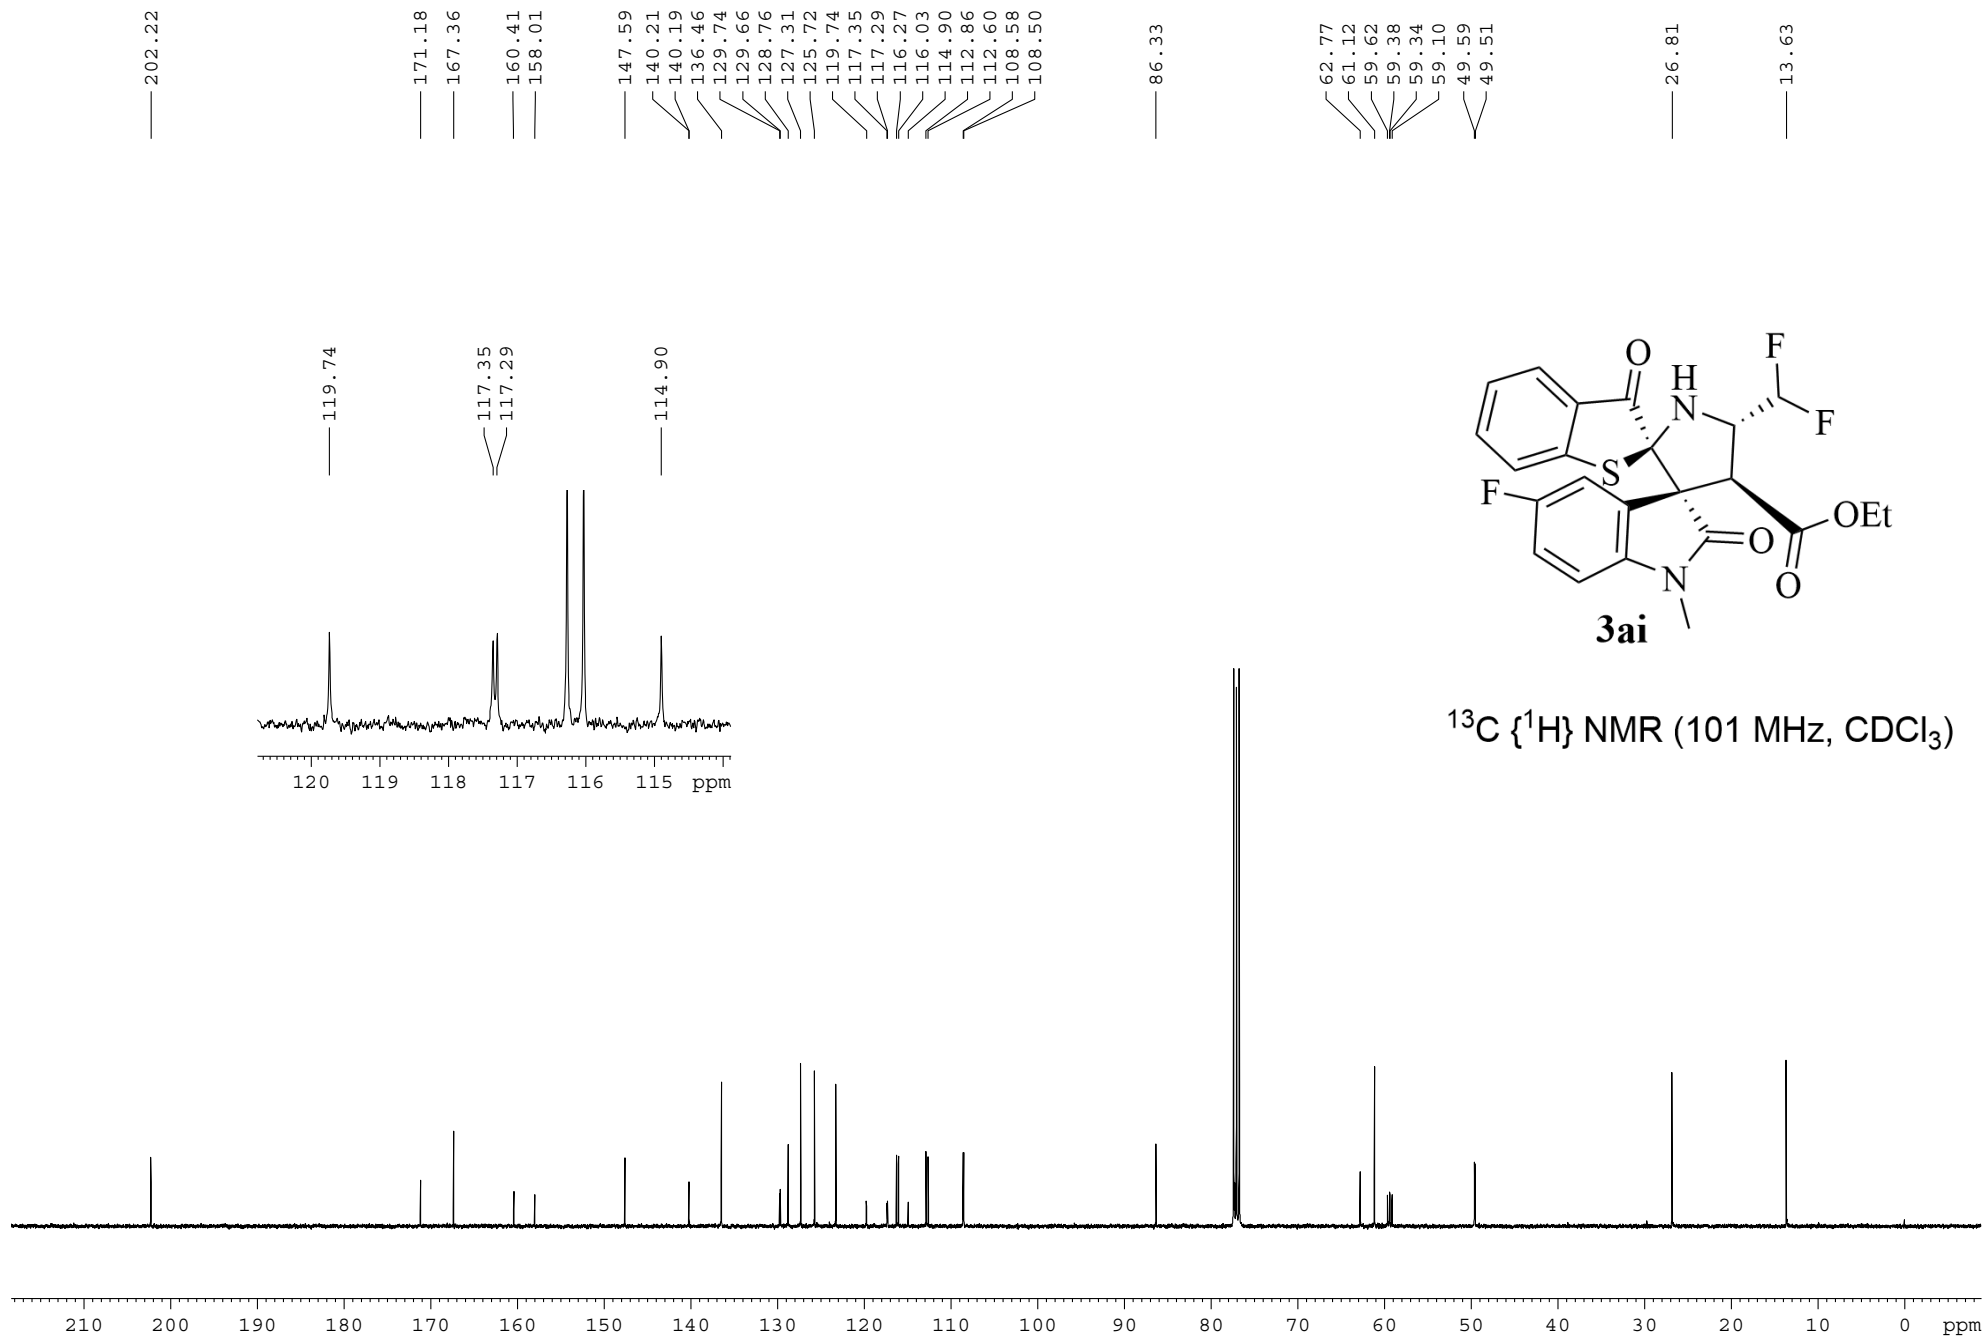

-118.777  
-118.882

-119.672

-122.517

-123.307

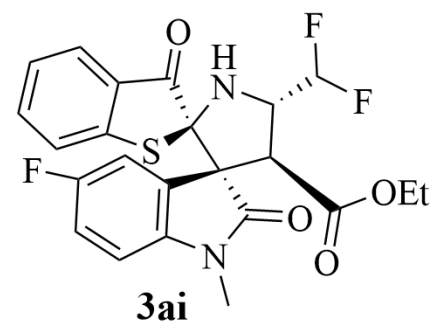

$^{19}\text{F}$  NMR (376 MHz,  $\text{CDCl}_3$ )

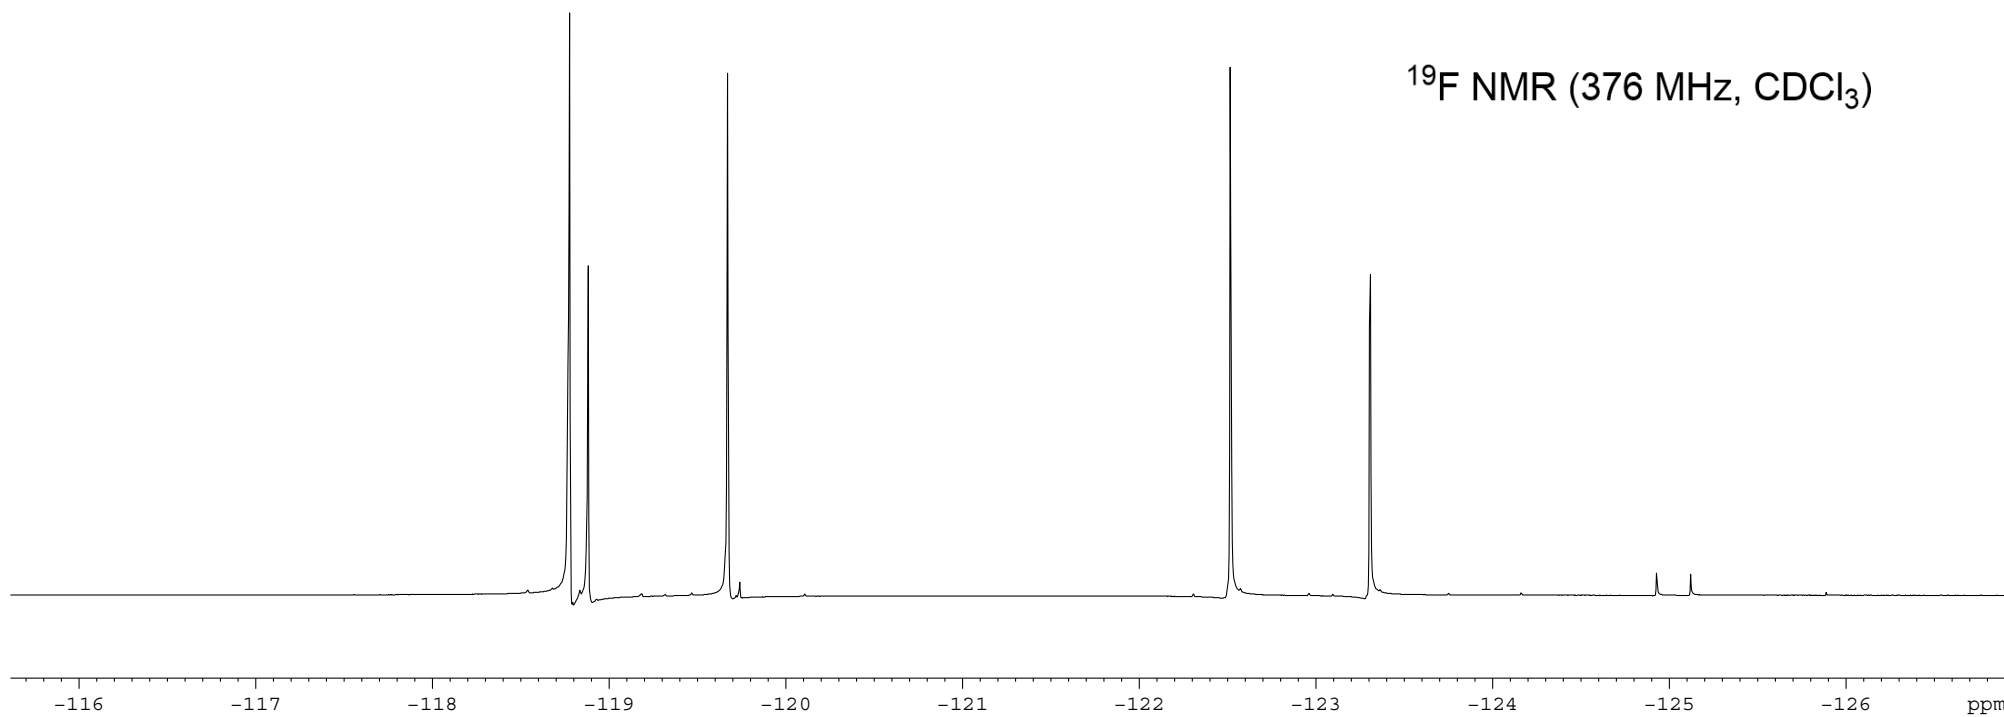

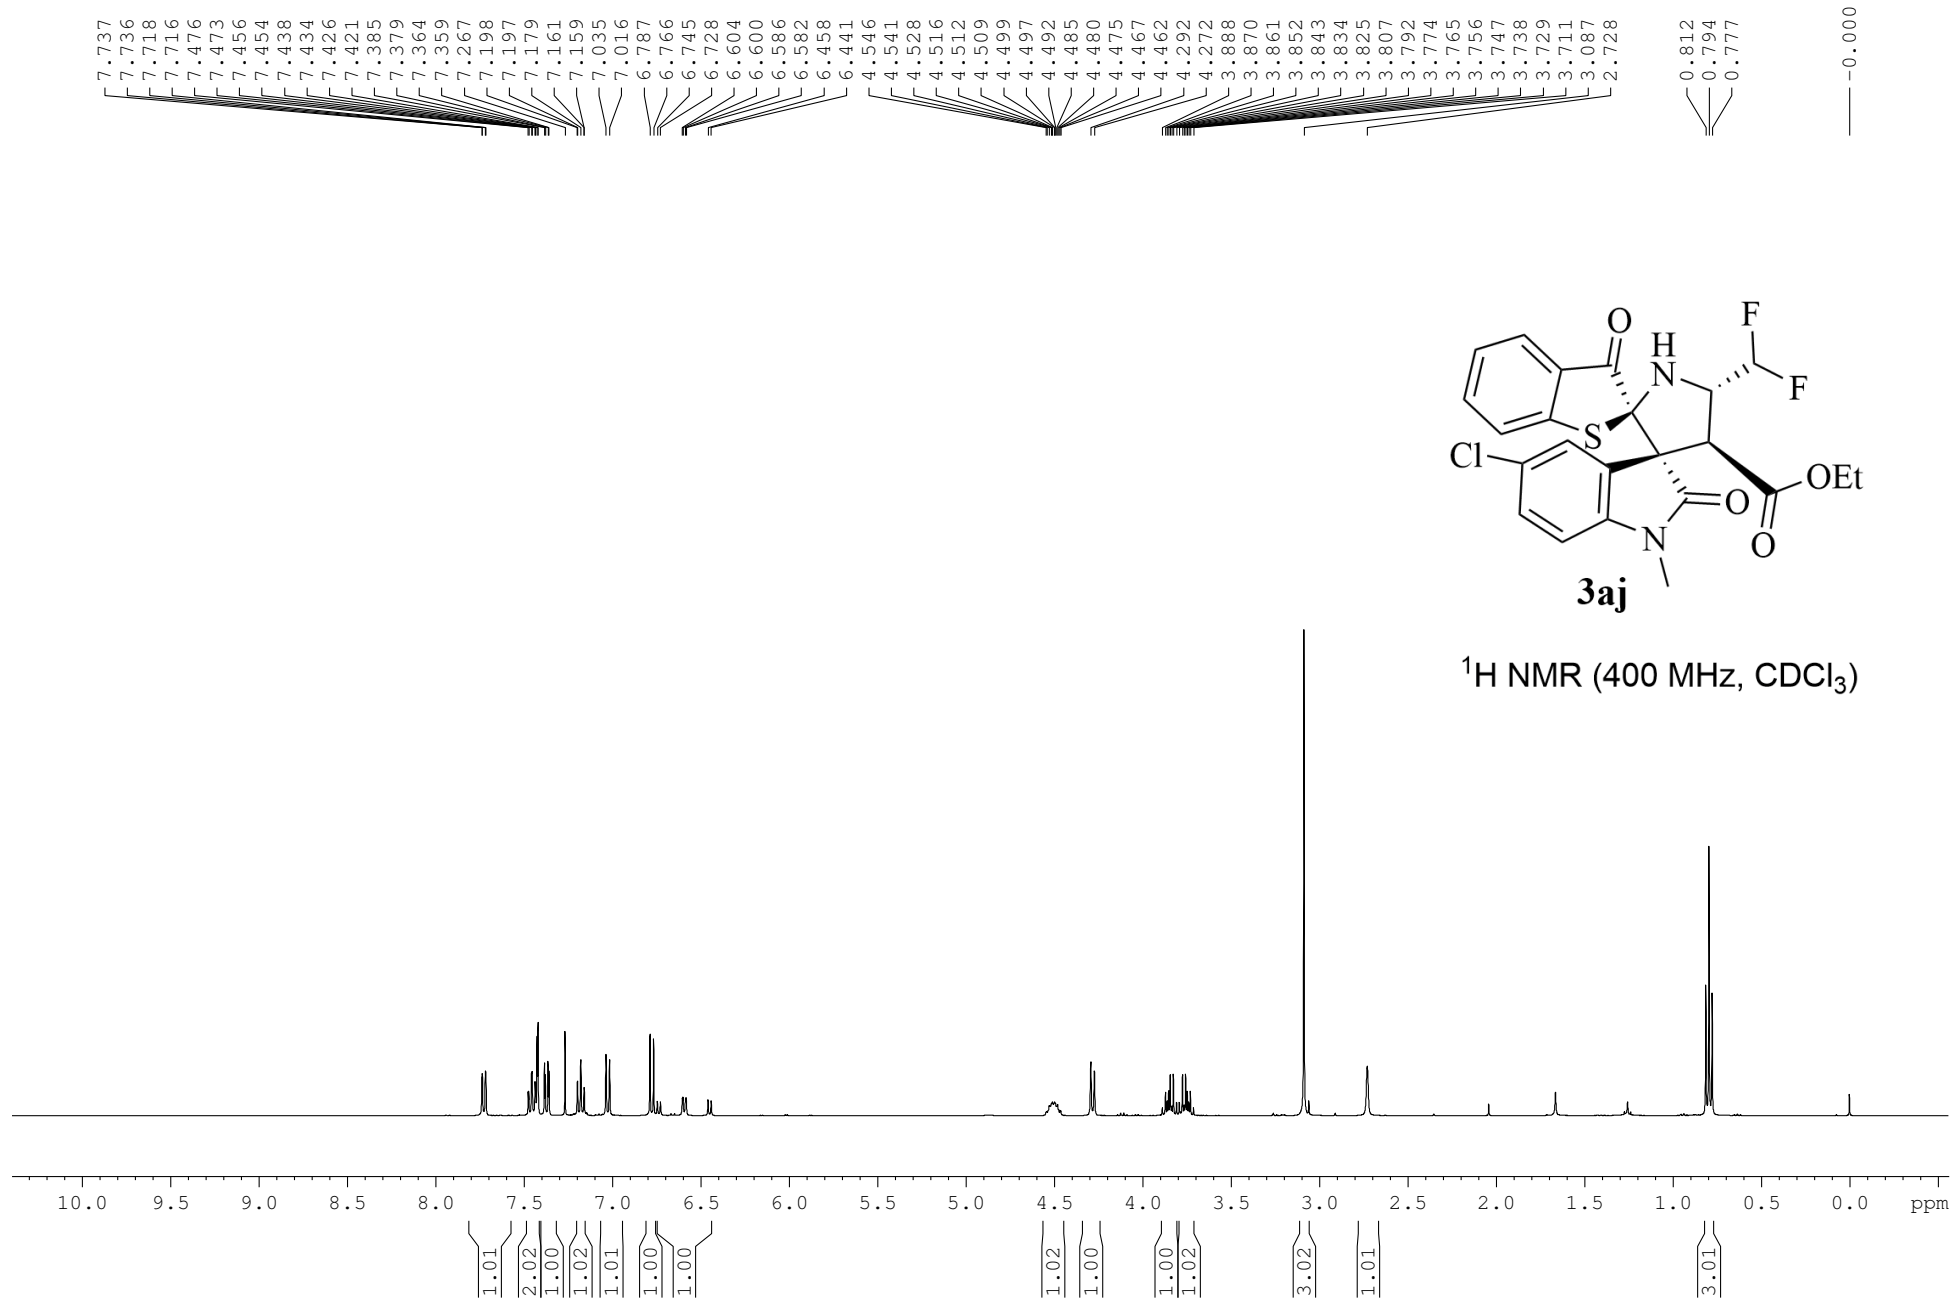



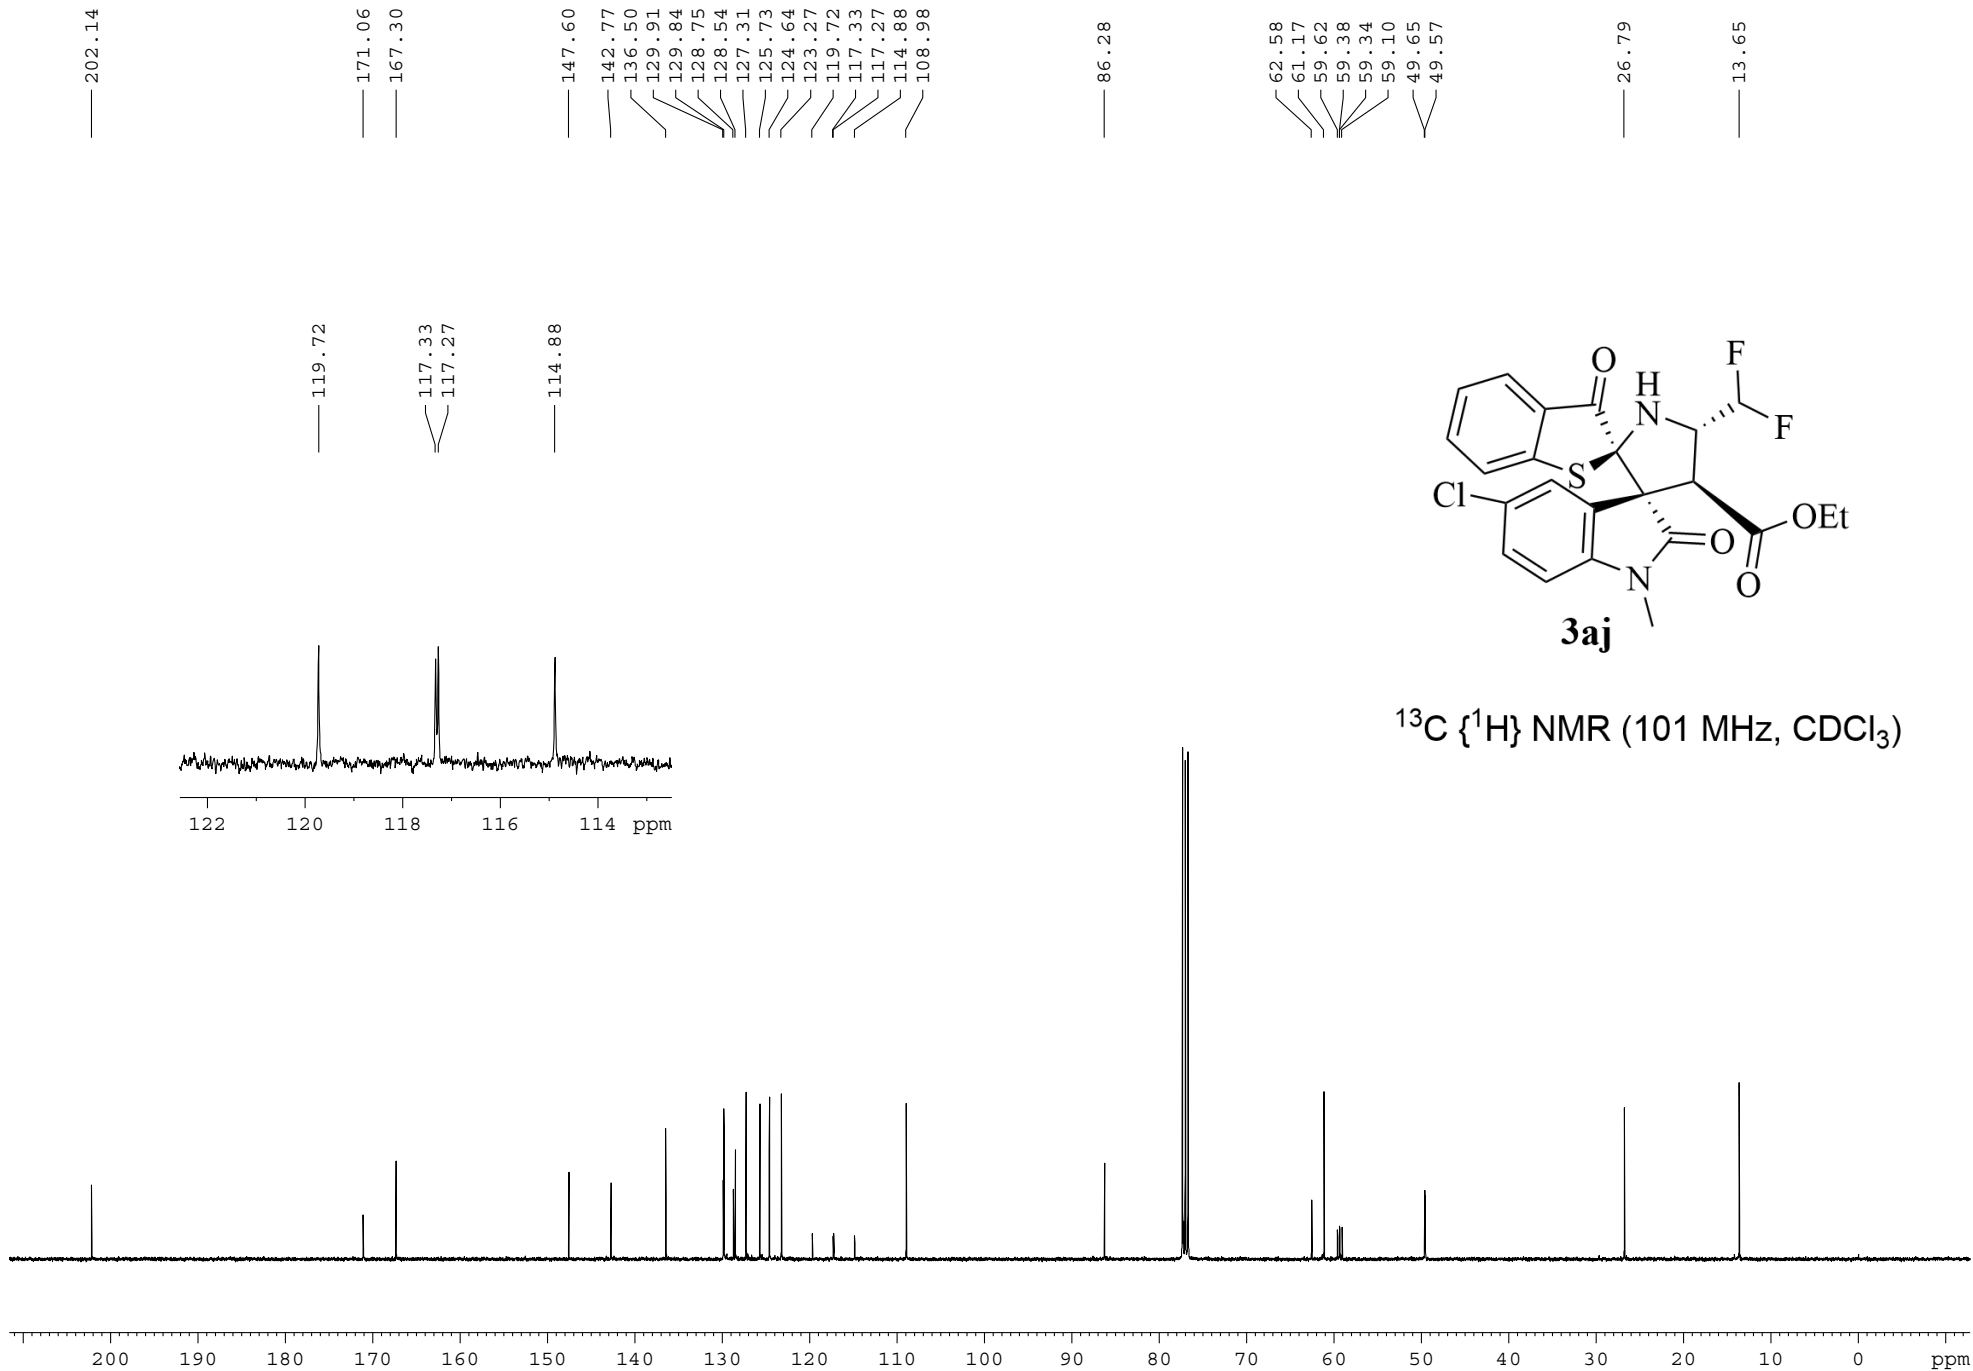

— -118.868

— -119.657

— -122.472

— -123.262

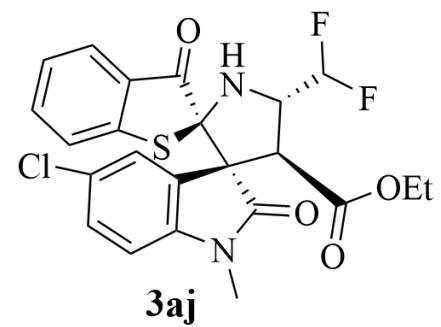

$^{19}\text{F}$  NMR (376 MHz,  $\text{CDCl}_3$ )

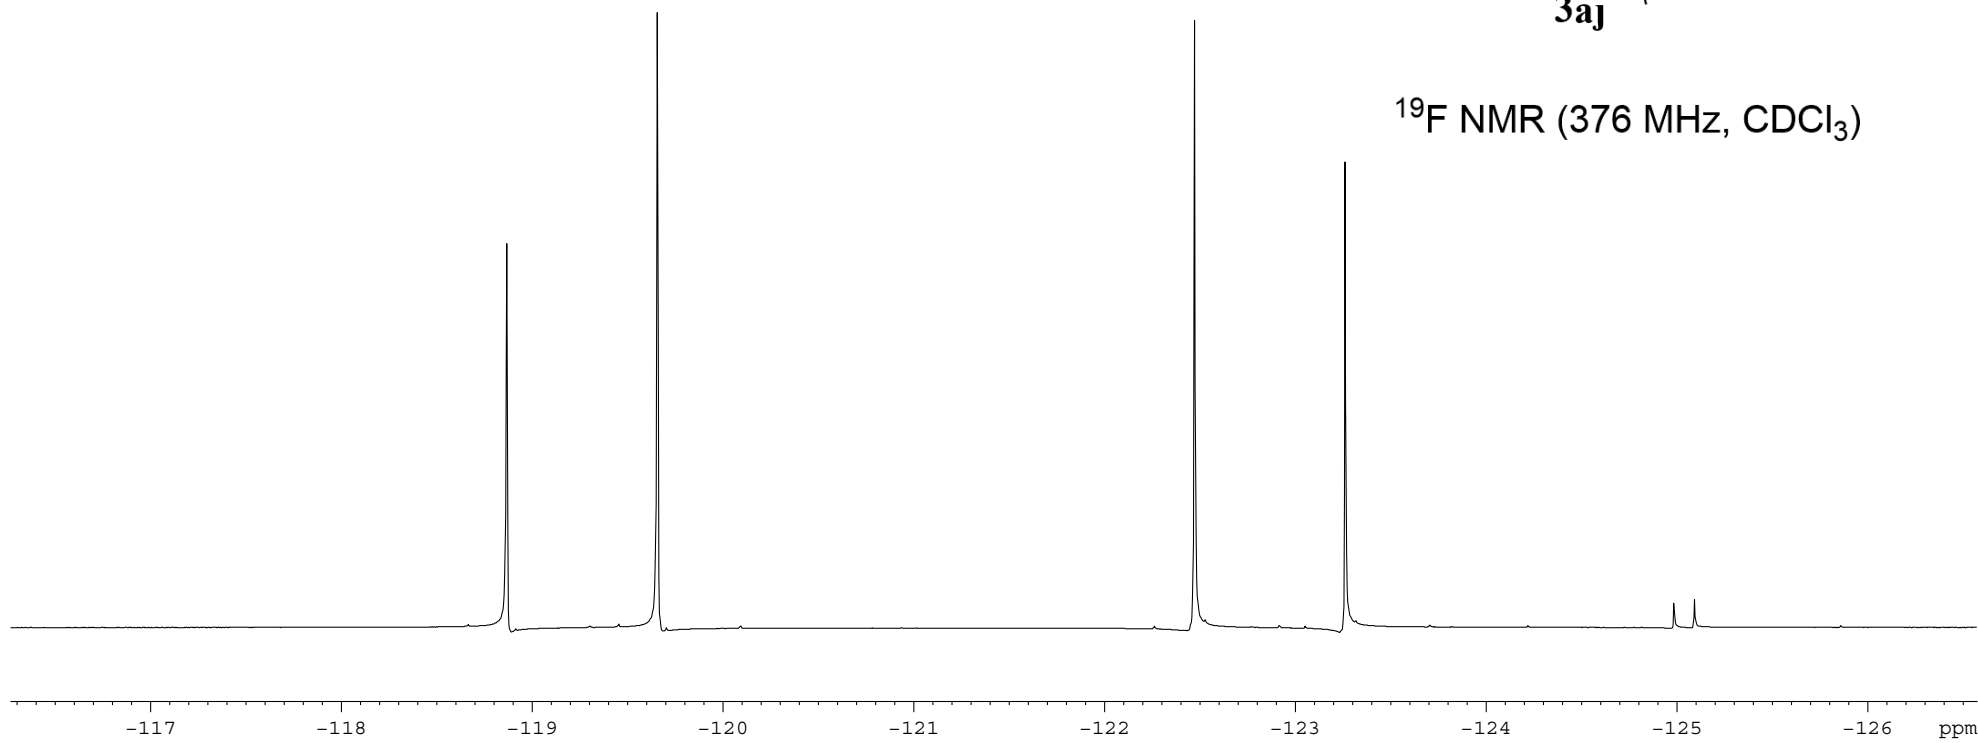

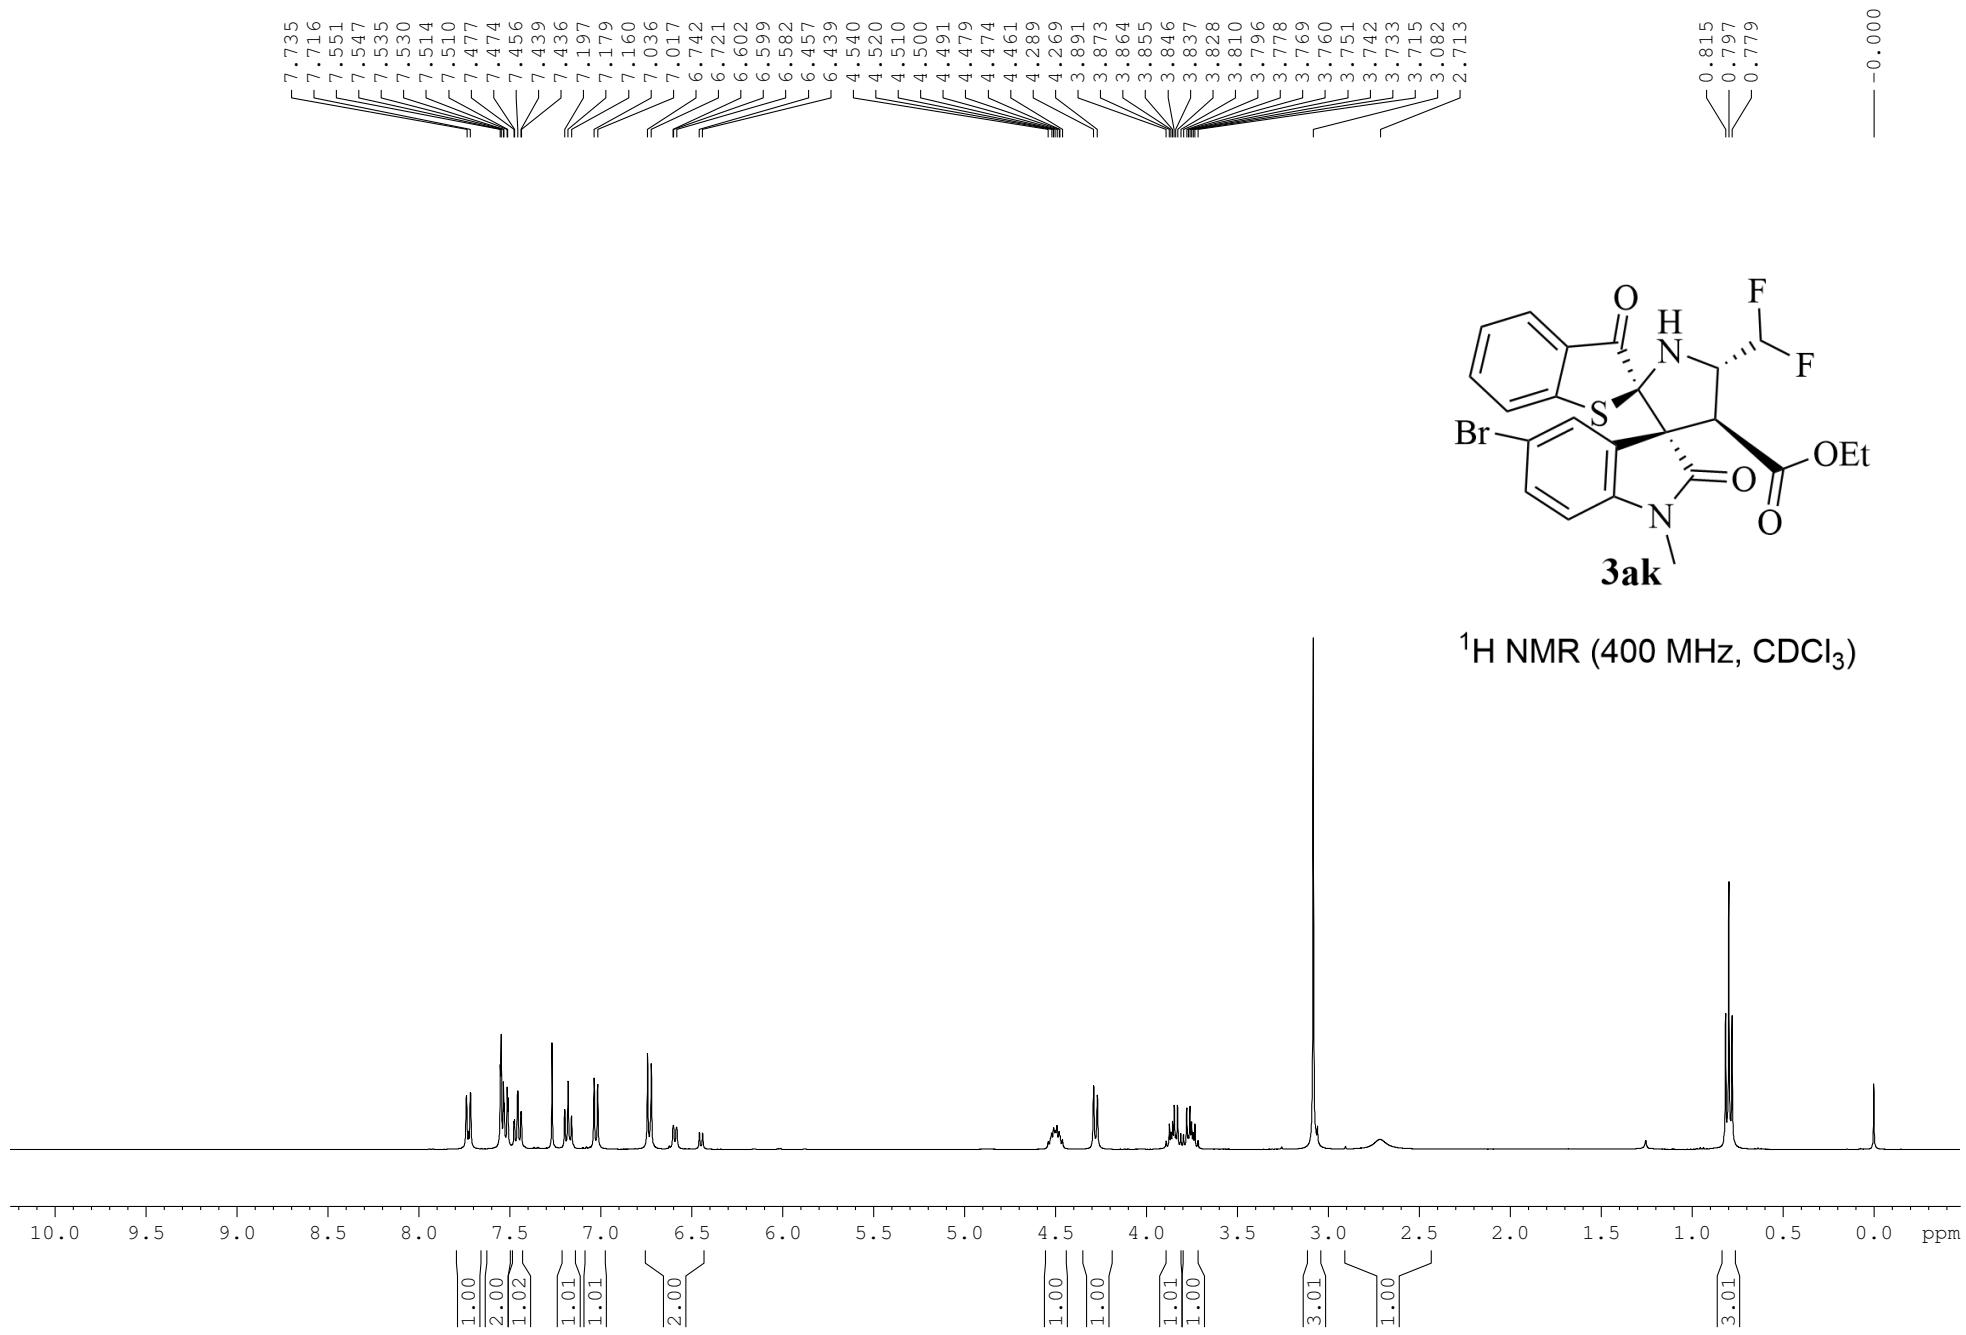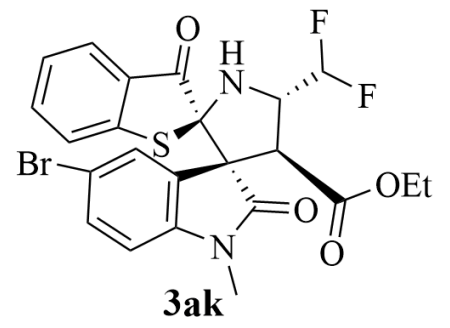

<sup>1</sup>H NMR (400 MHz, CDCl<sub>3</sub>)

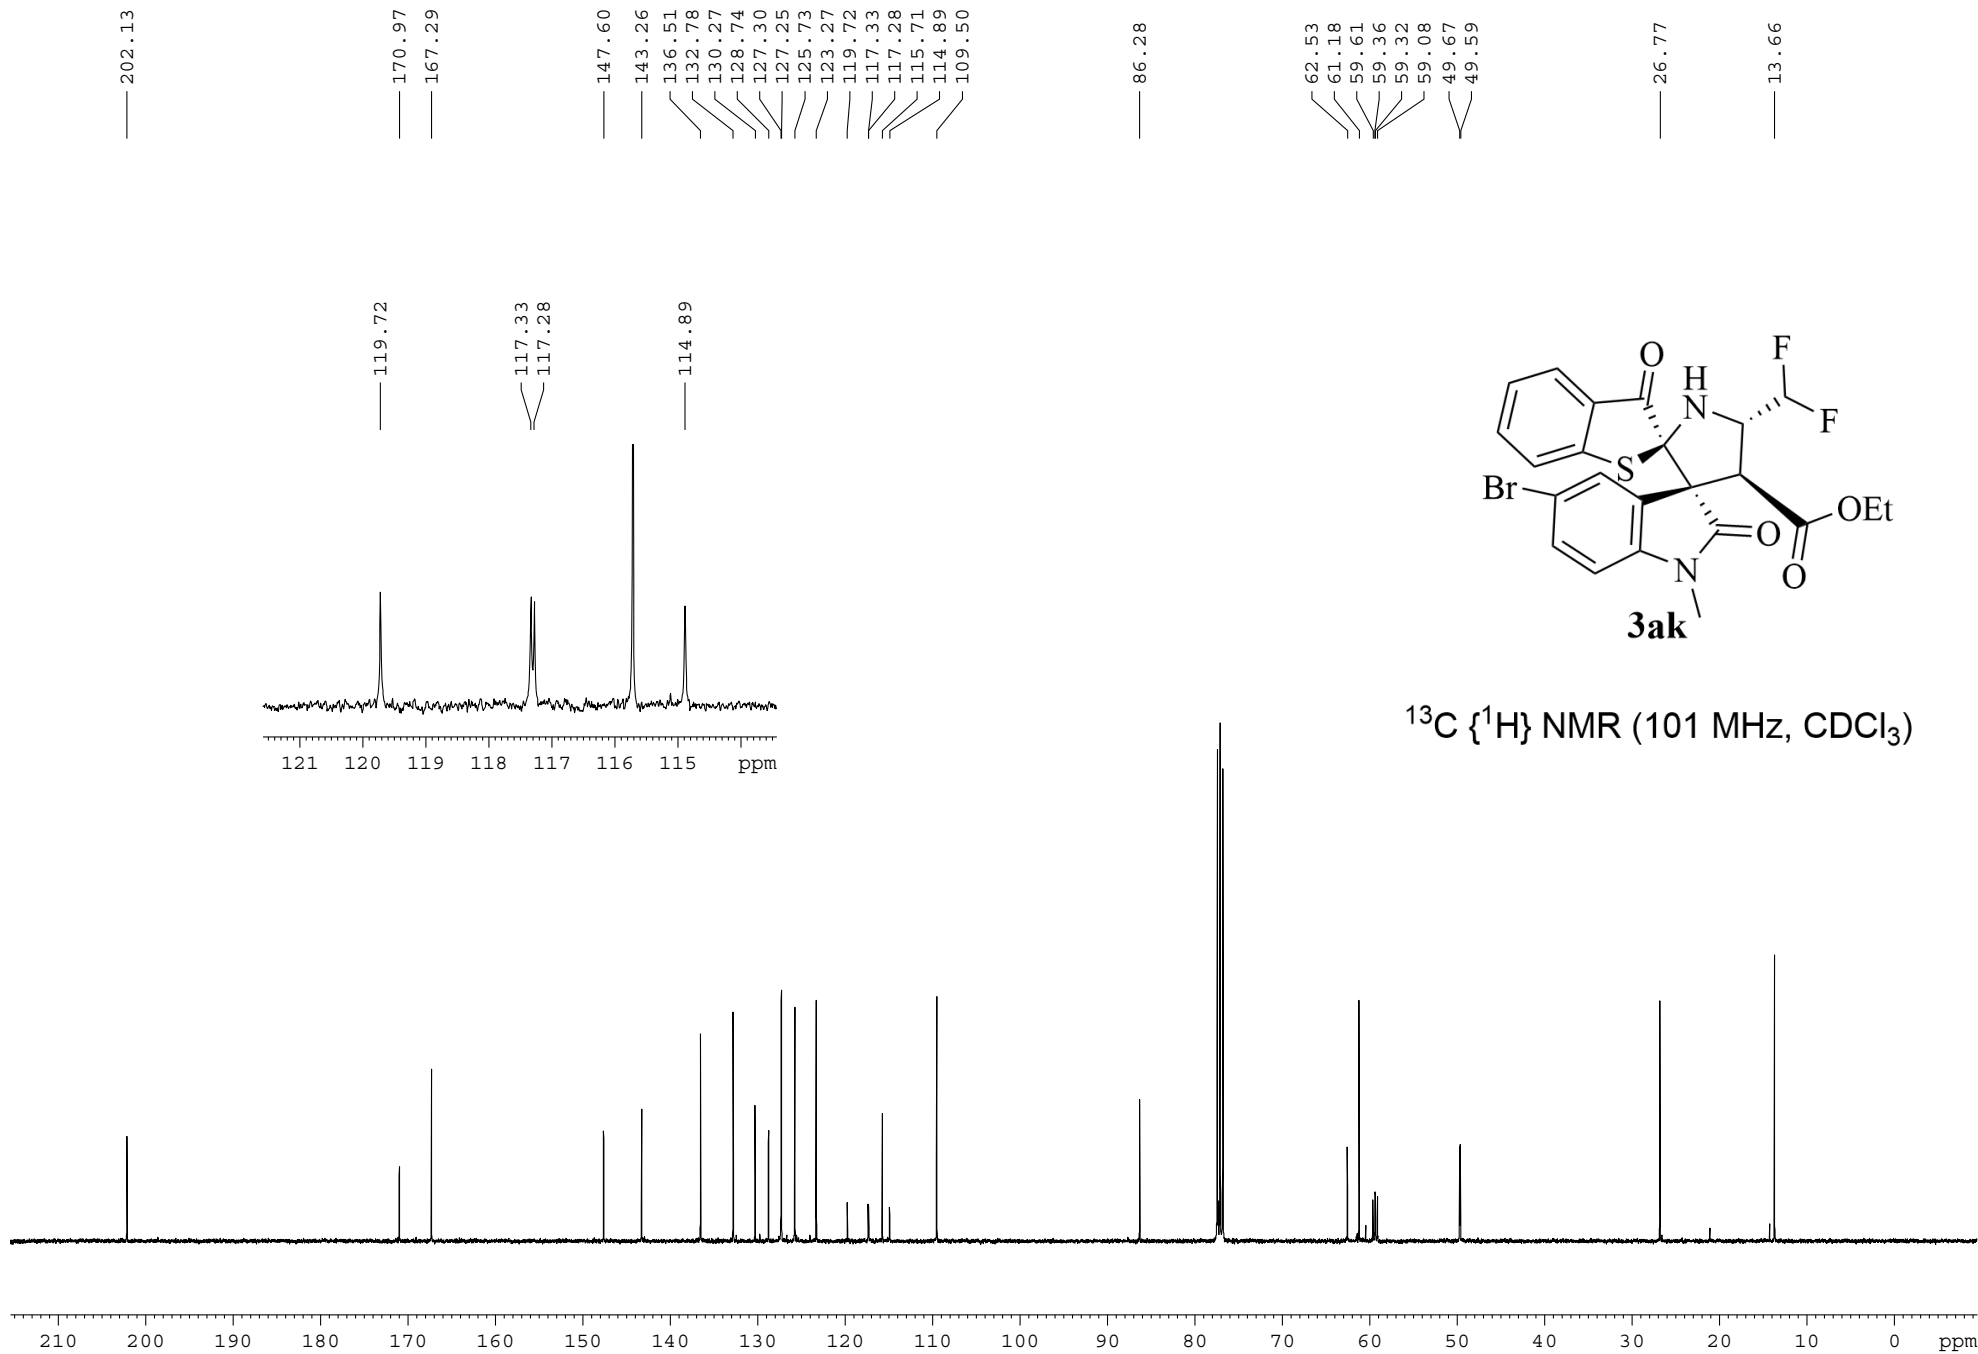

— -118.823

— -119.613

— -122.447

— -123.236

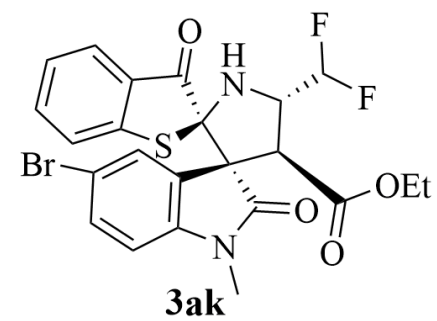

$^{19}\text{F}$  NMR (376 MHz,  $\text{CDCl}_3$ )

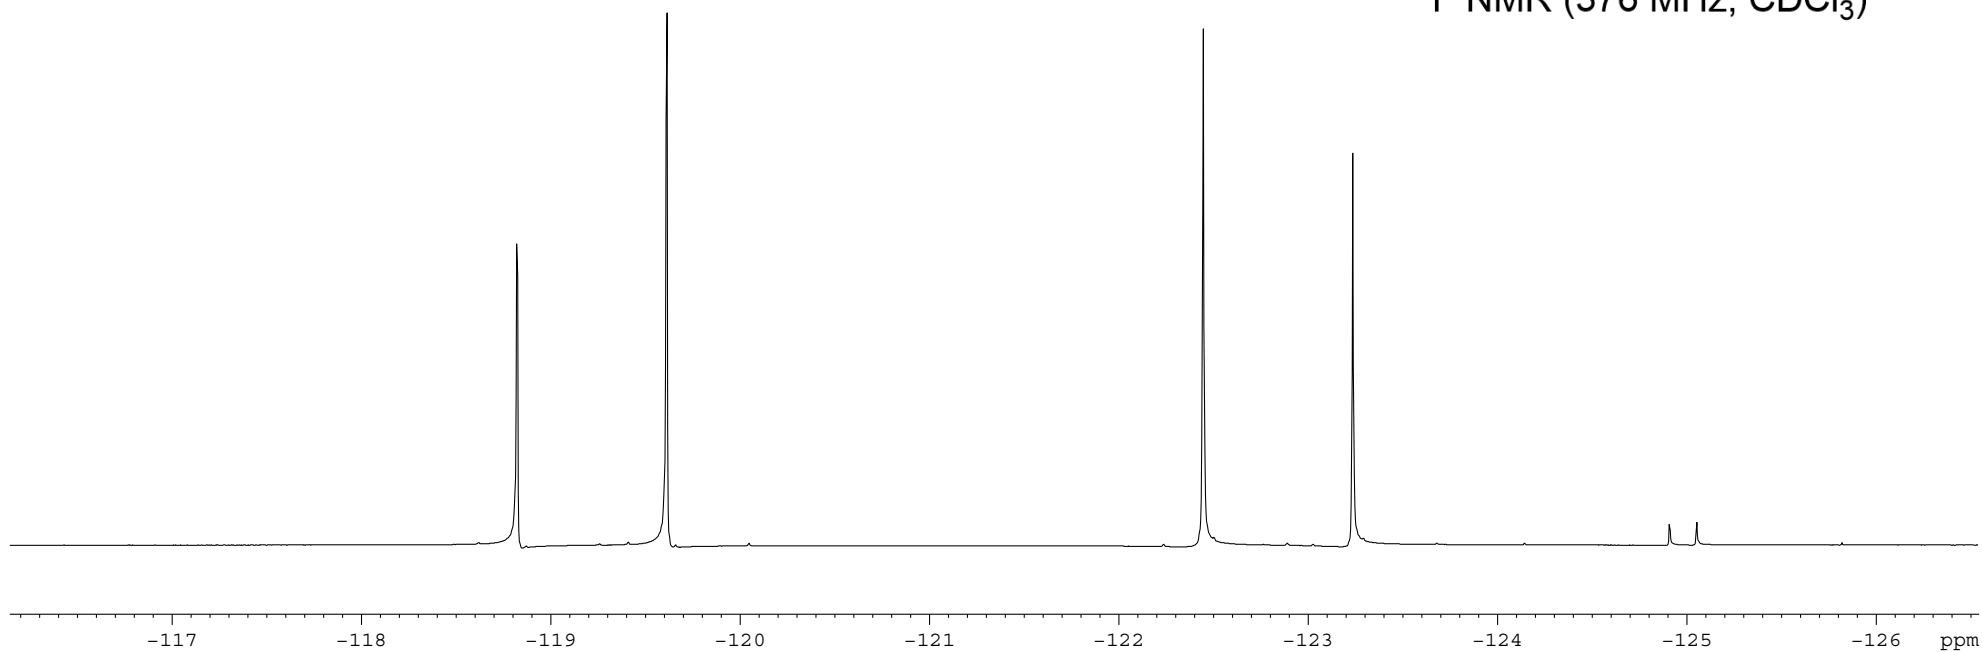

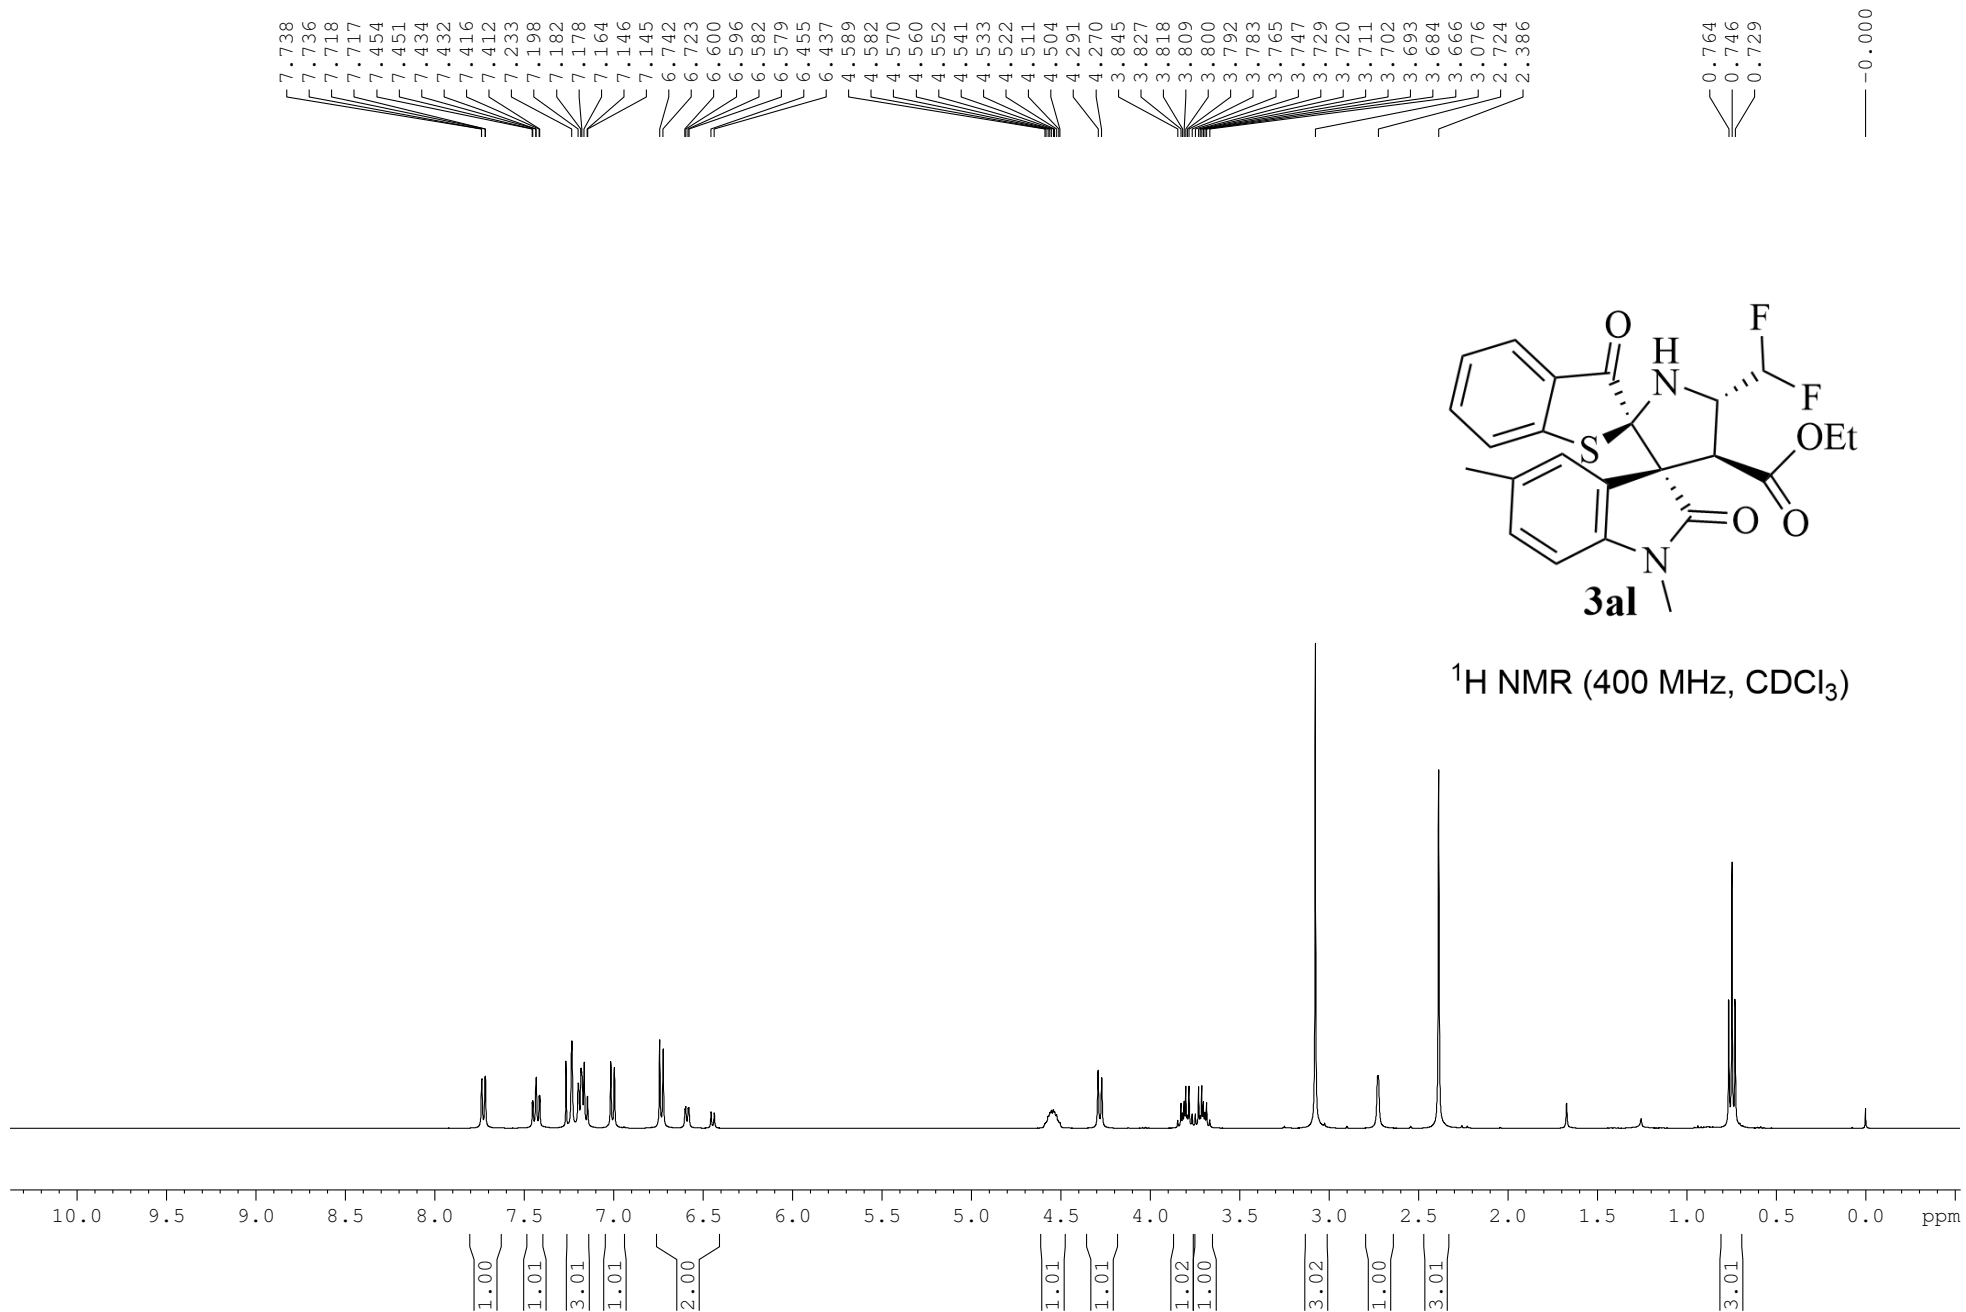

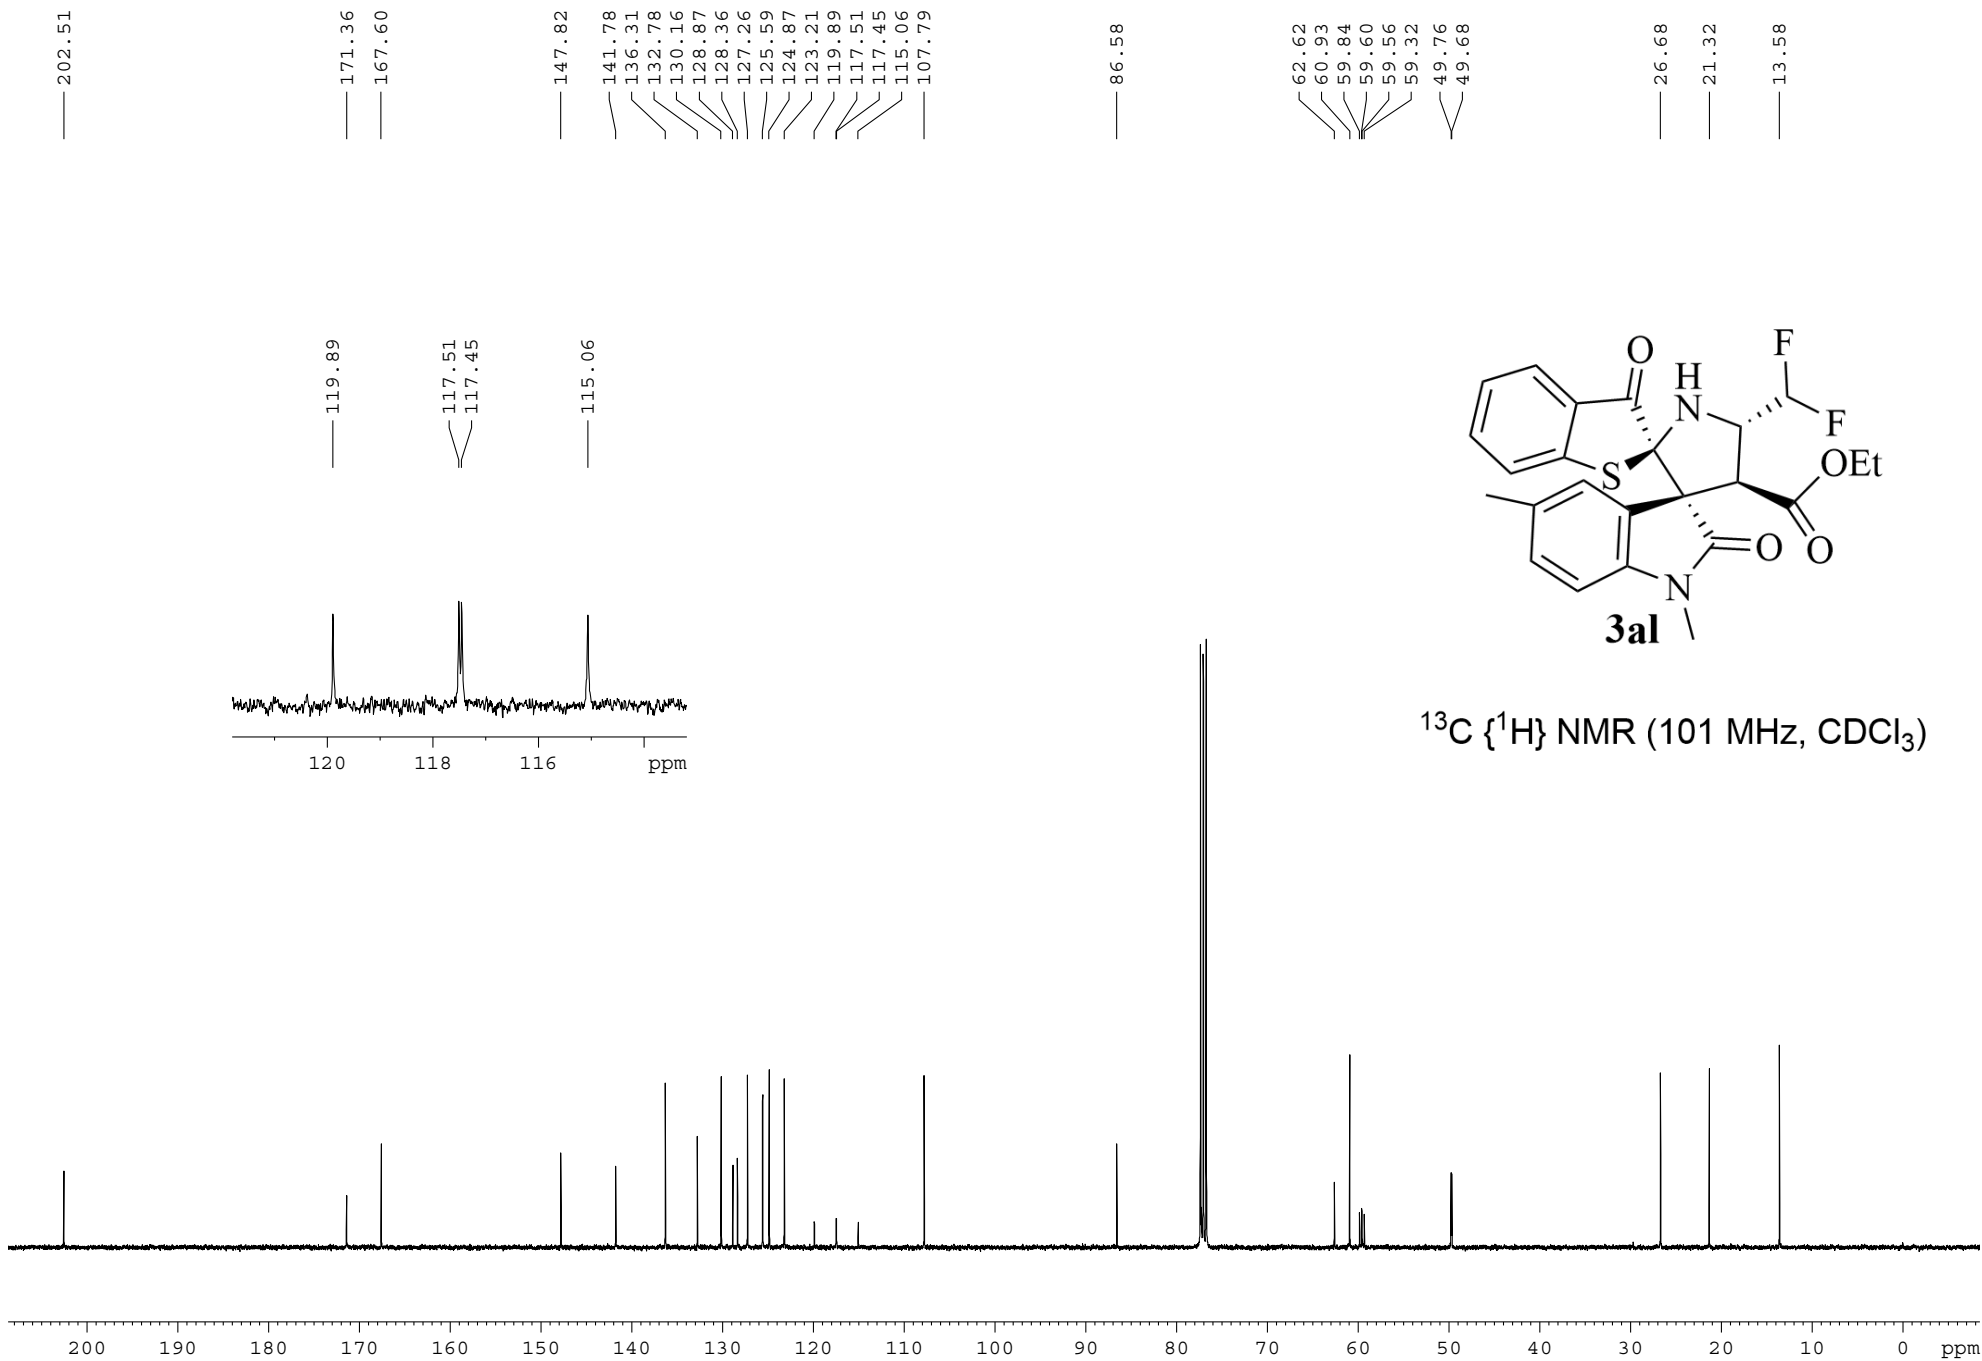

-118.885

-119.672

-122.611

-123.398

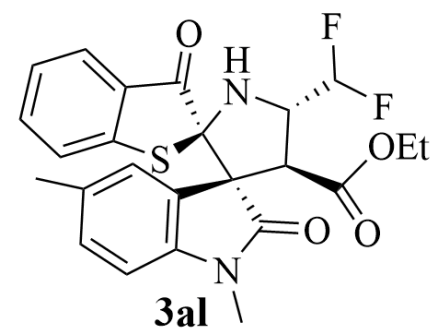

$^{19}\text{F}$  NMR (376 MHz,  $\text{CDCl}_3$ )

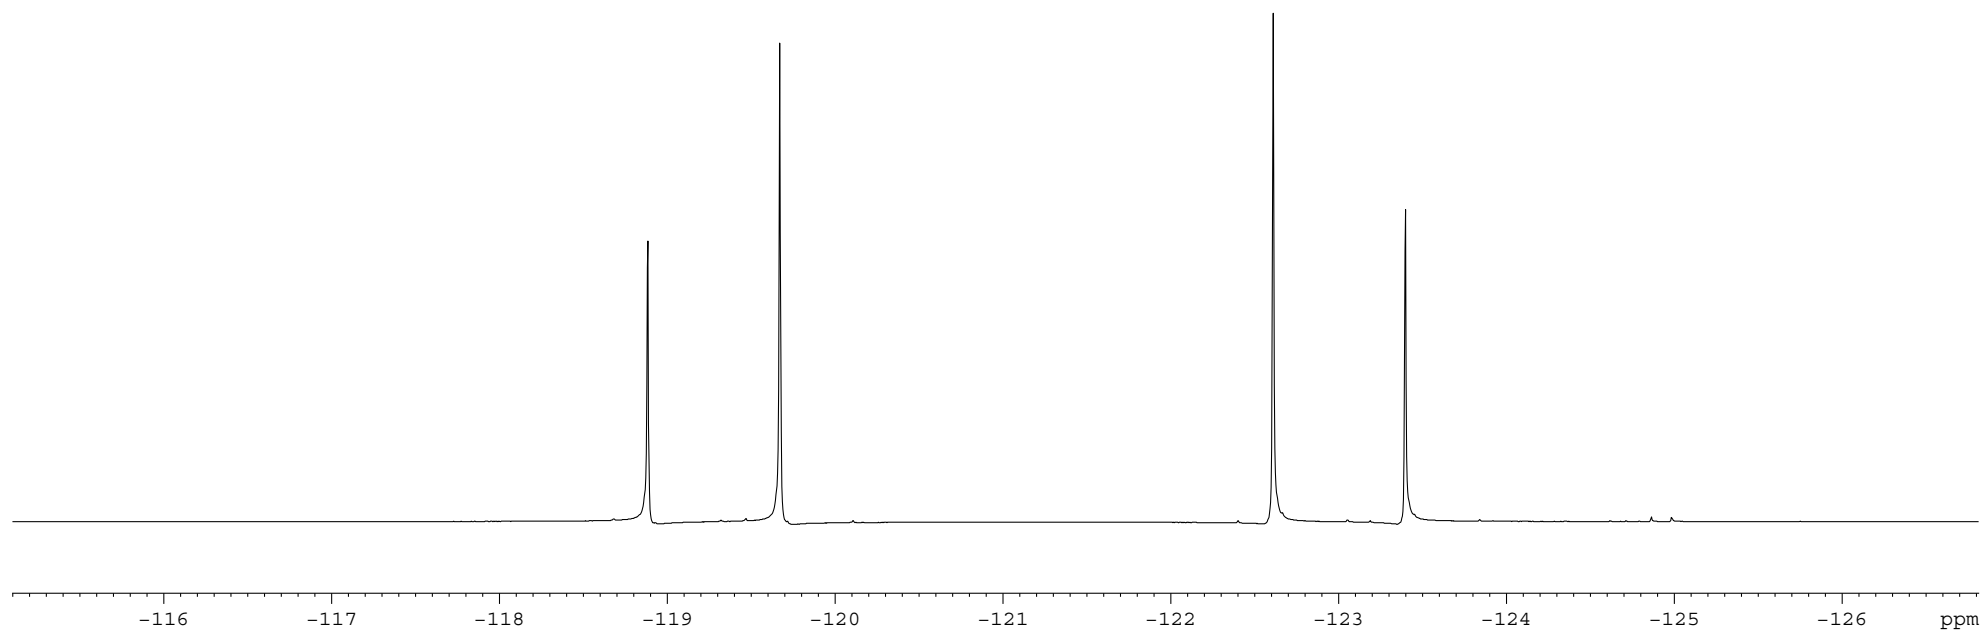



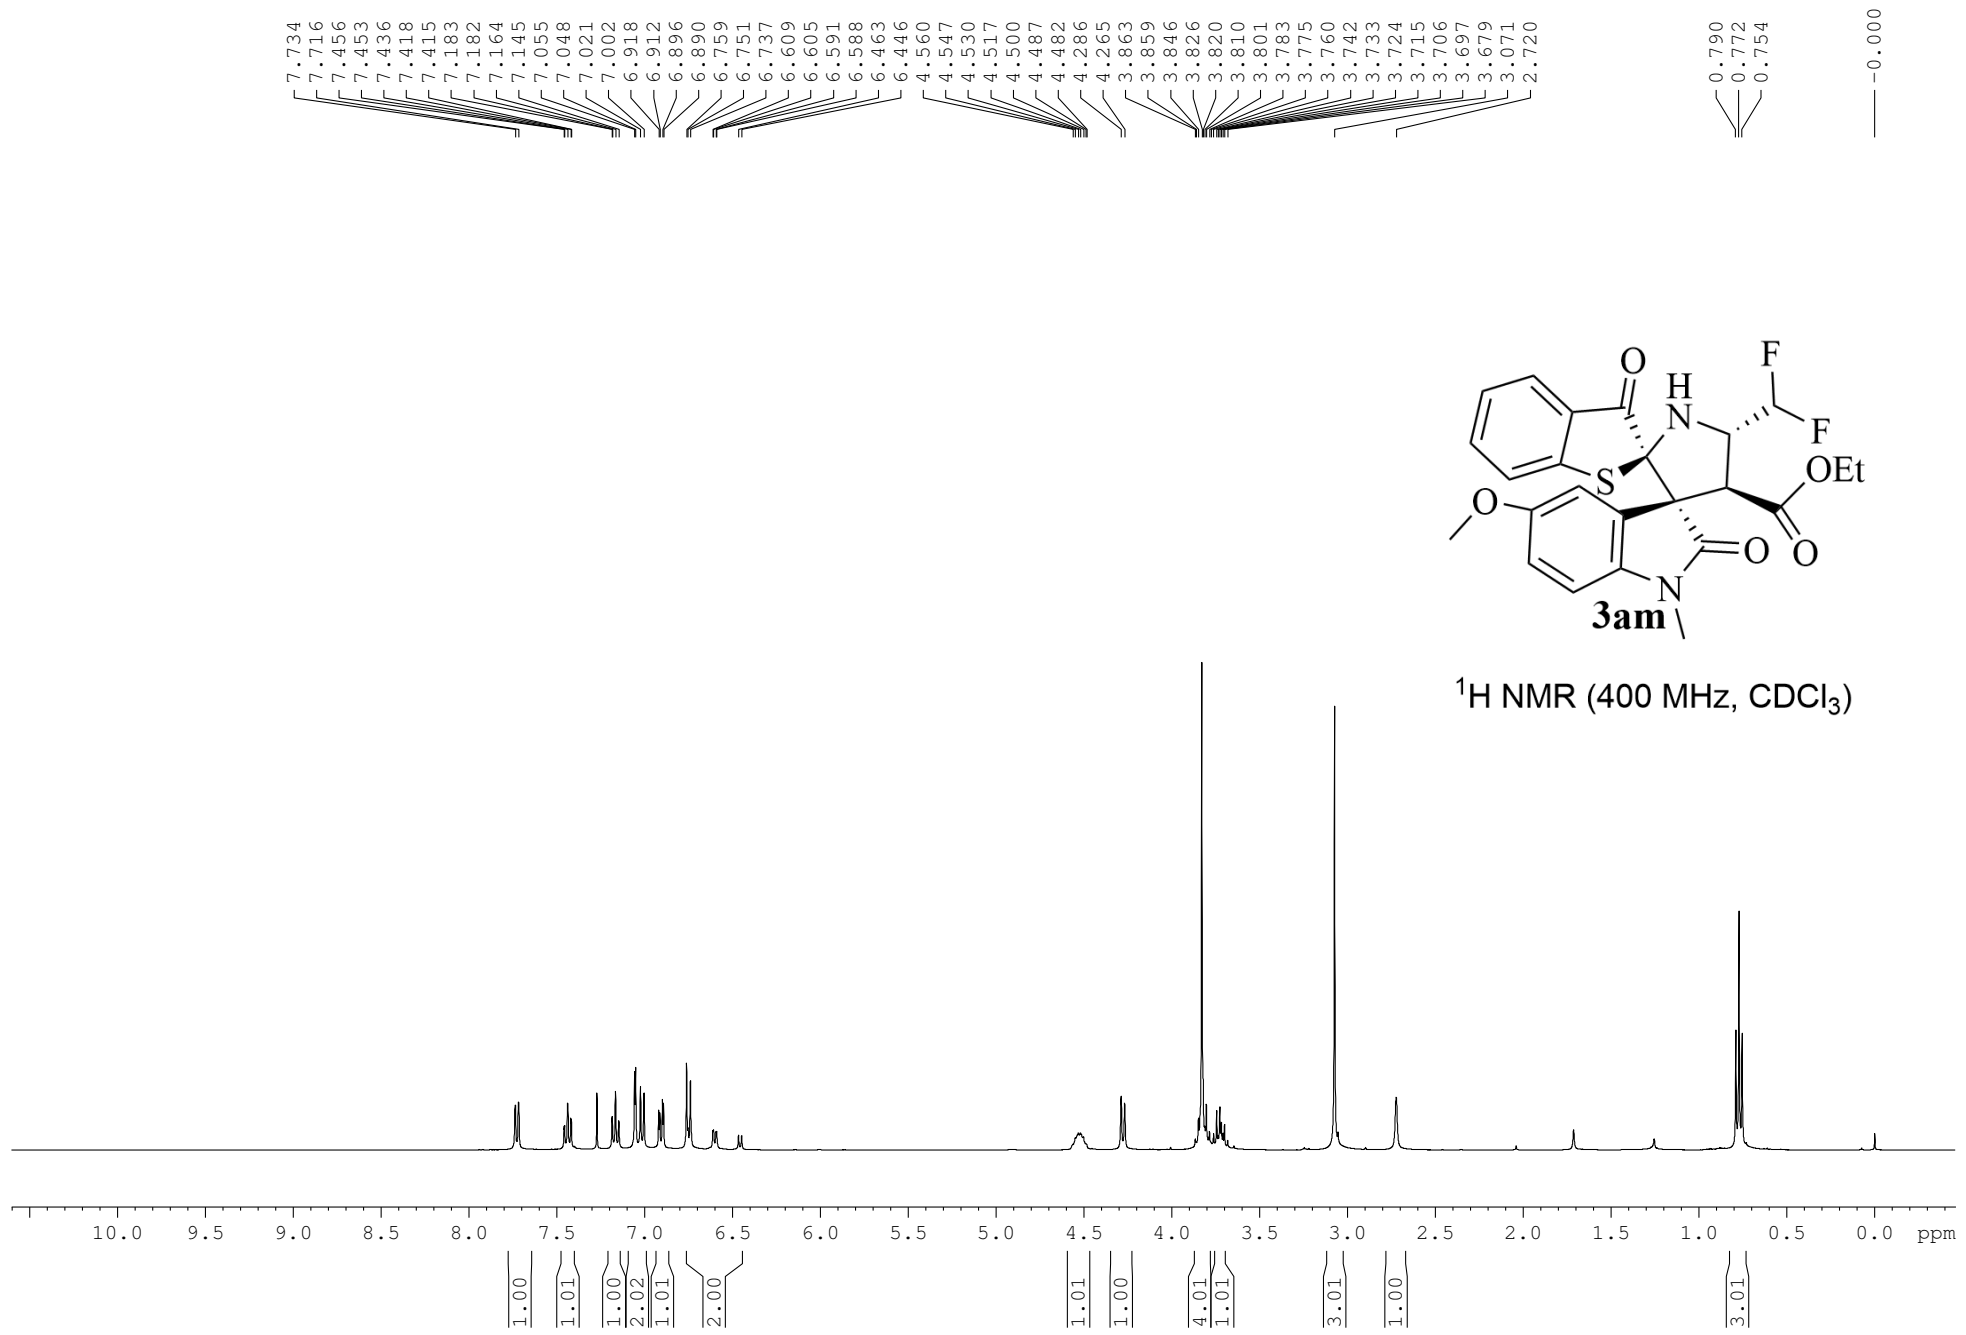

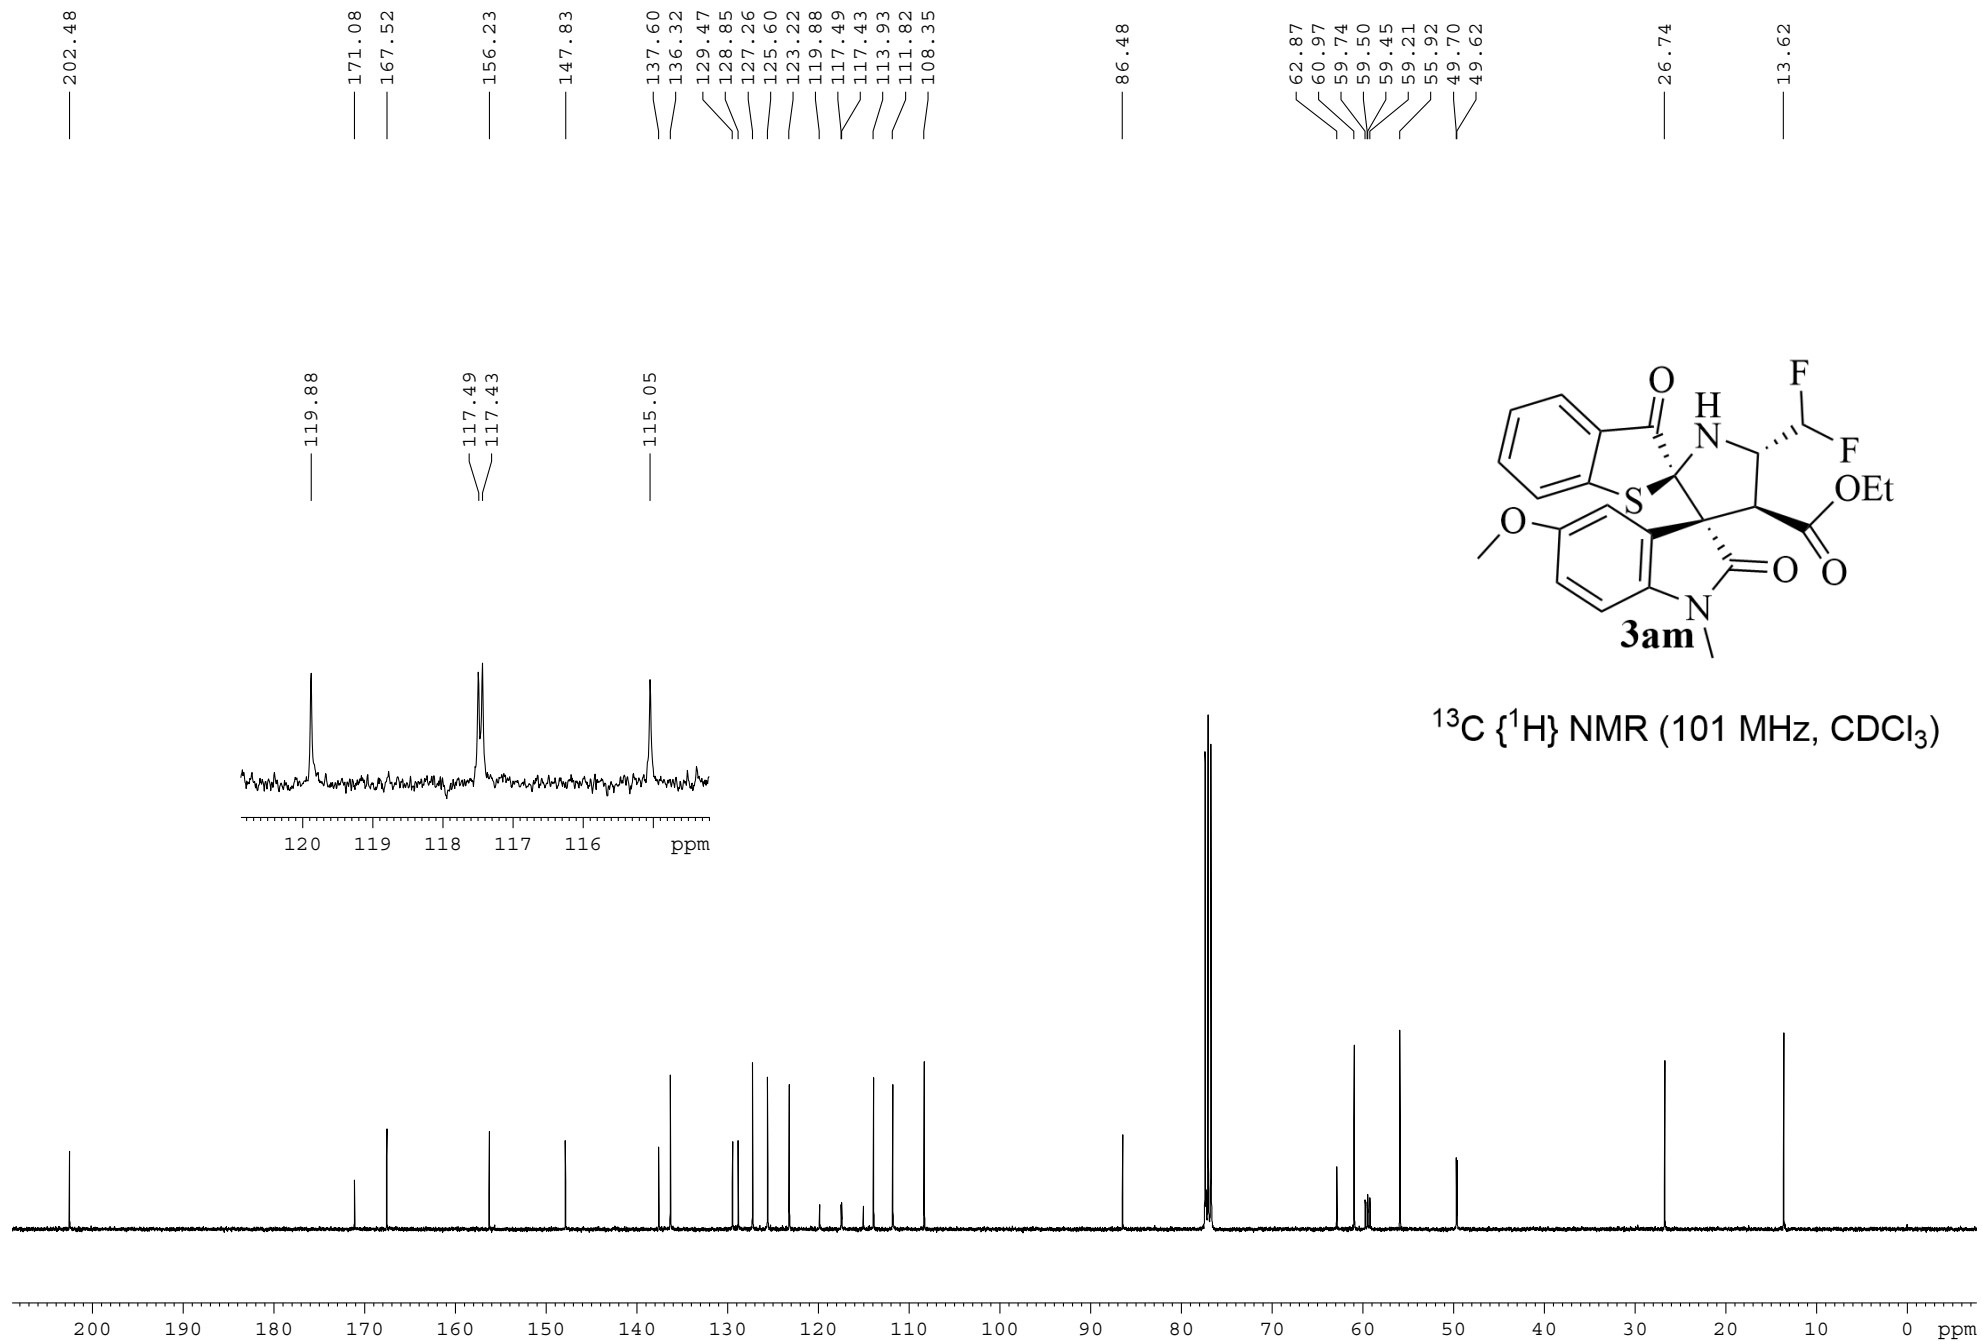

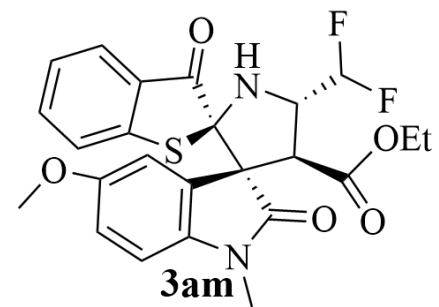

$^{19}\text{F}$  NMR (376 MHz,  $\text{CDCl}_3$ )

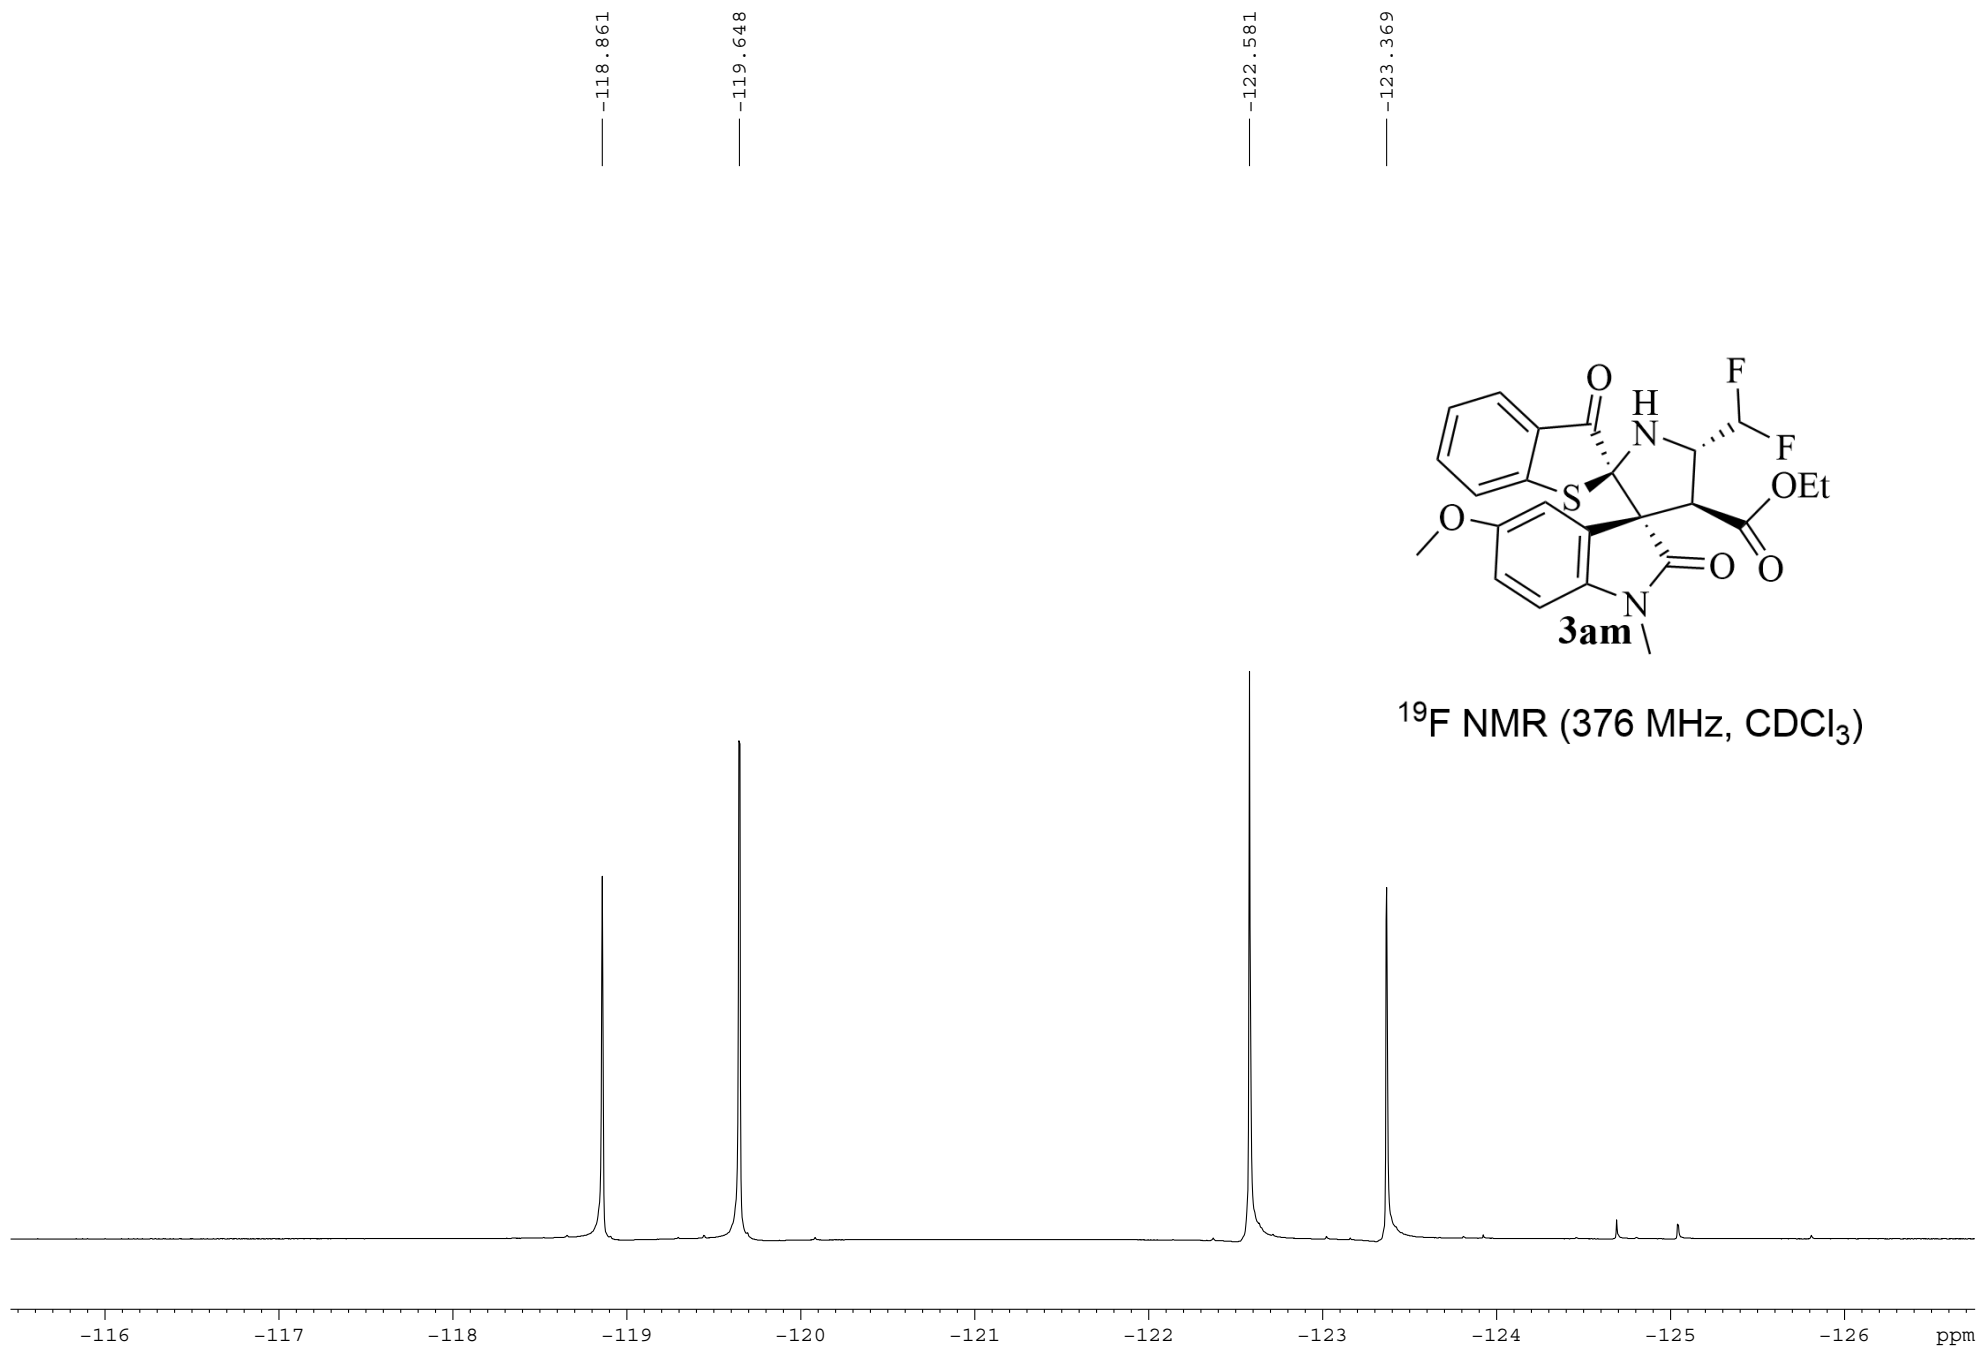

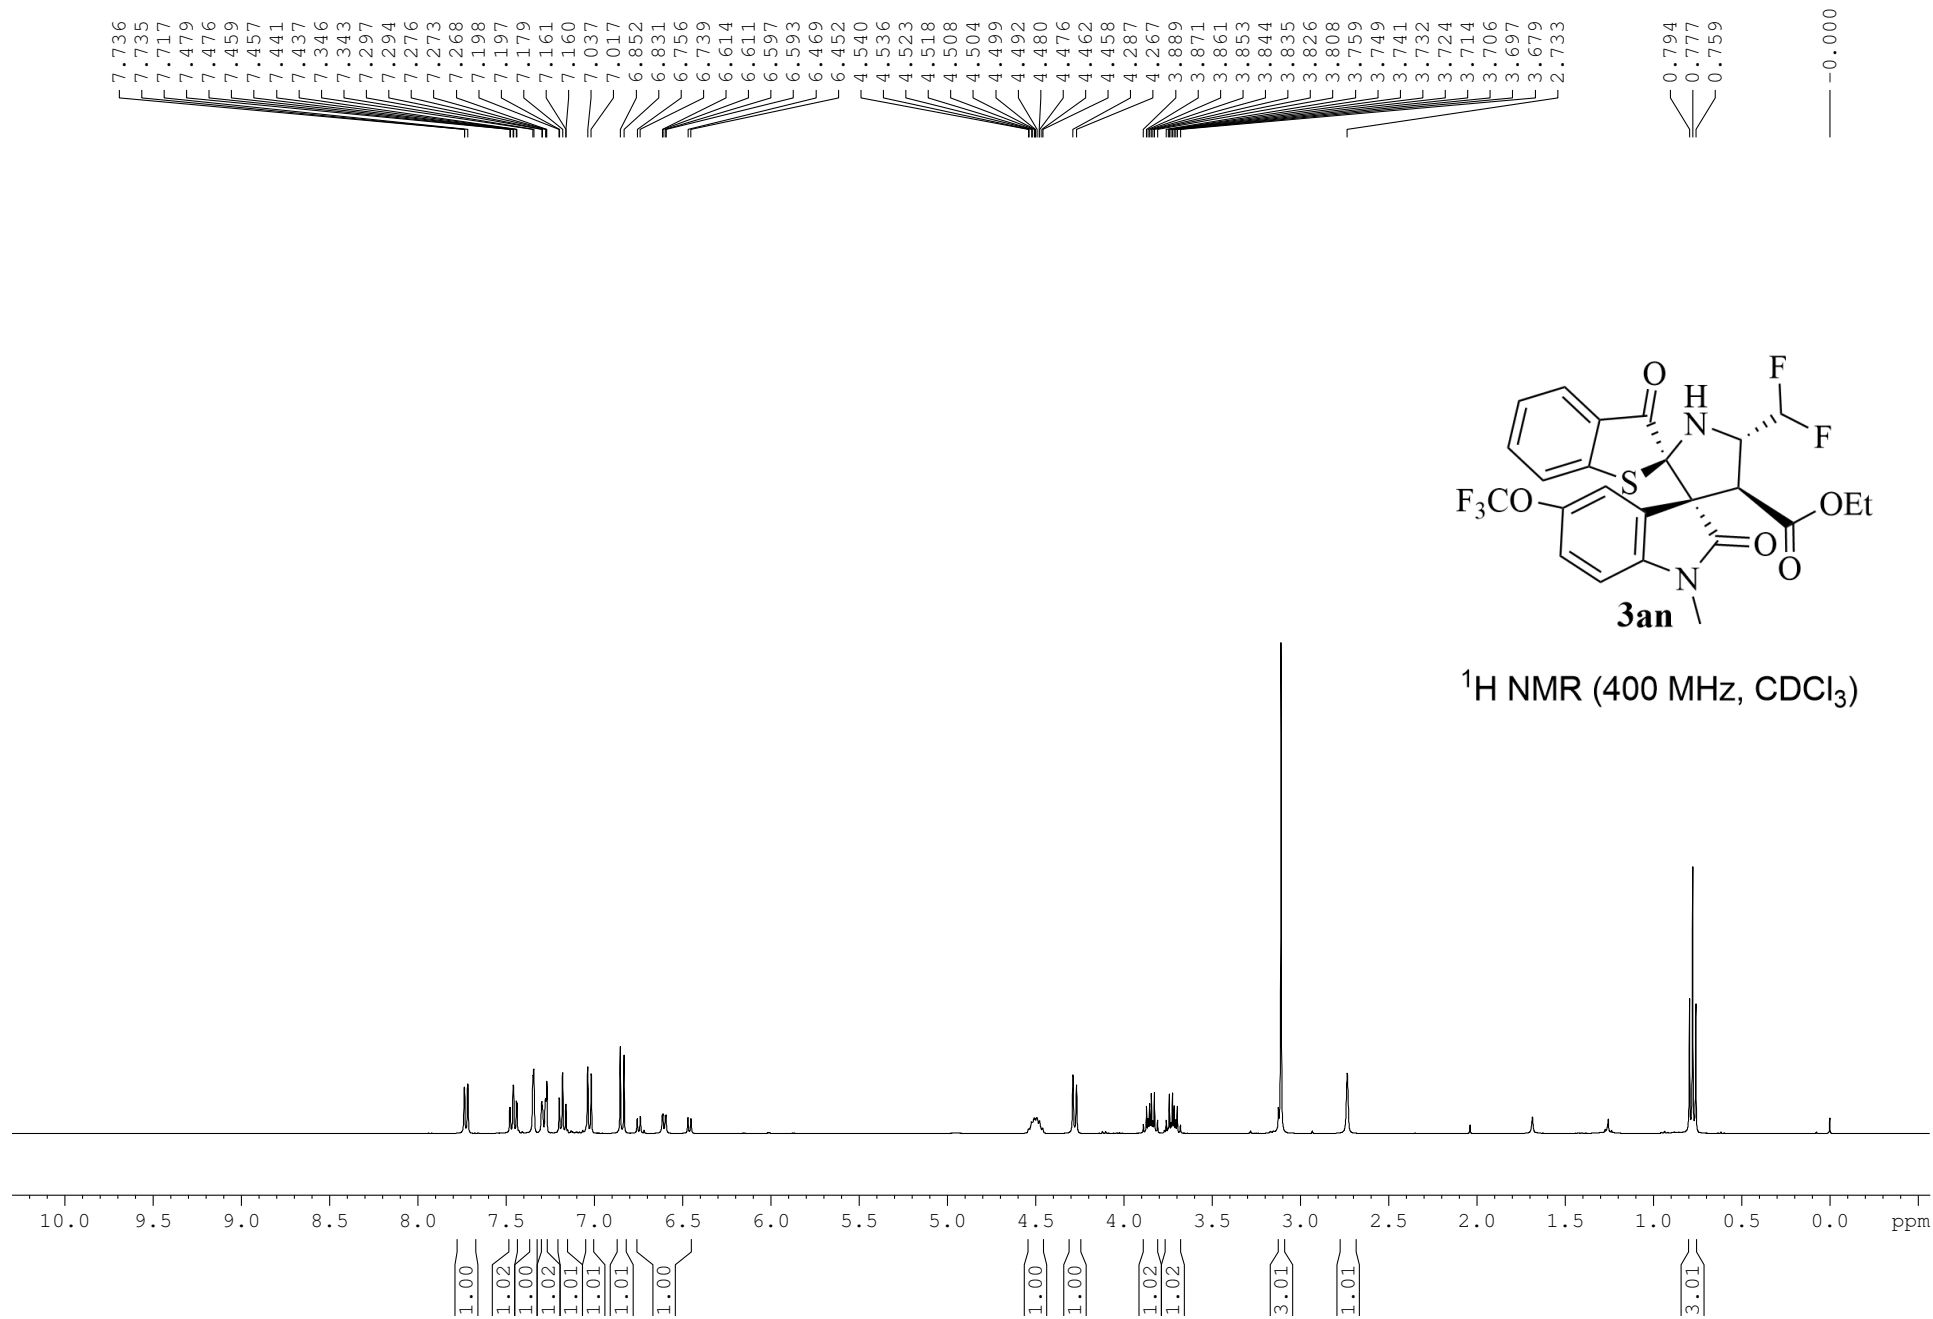

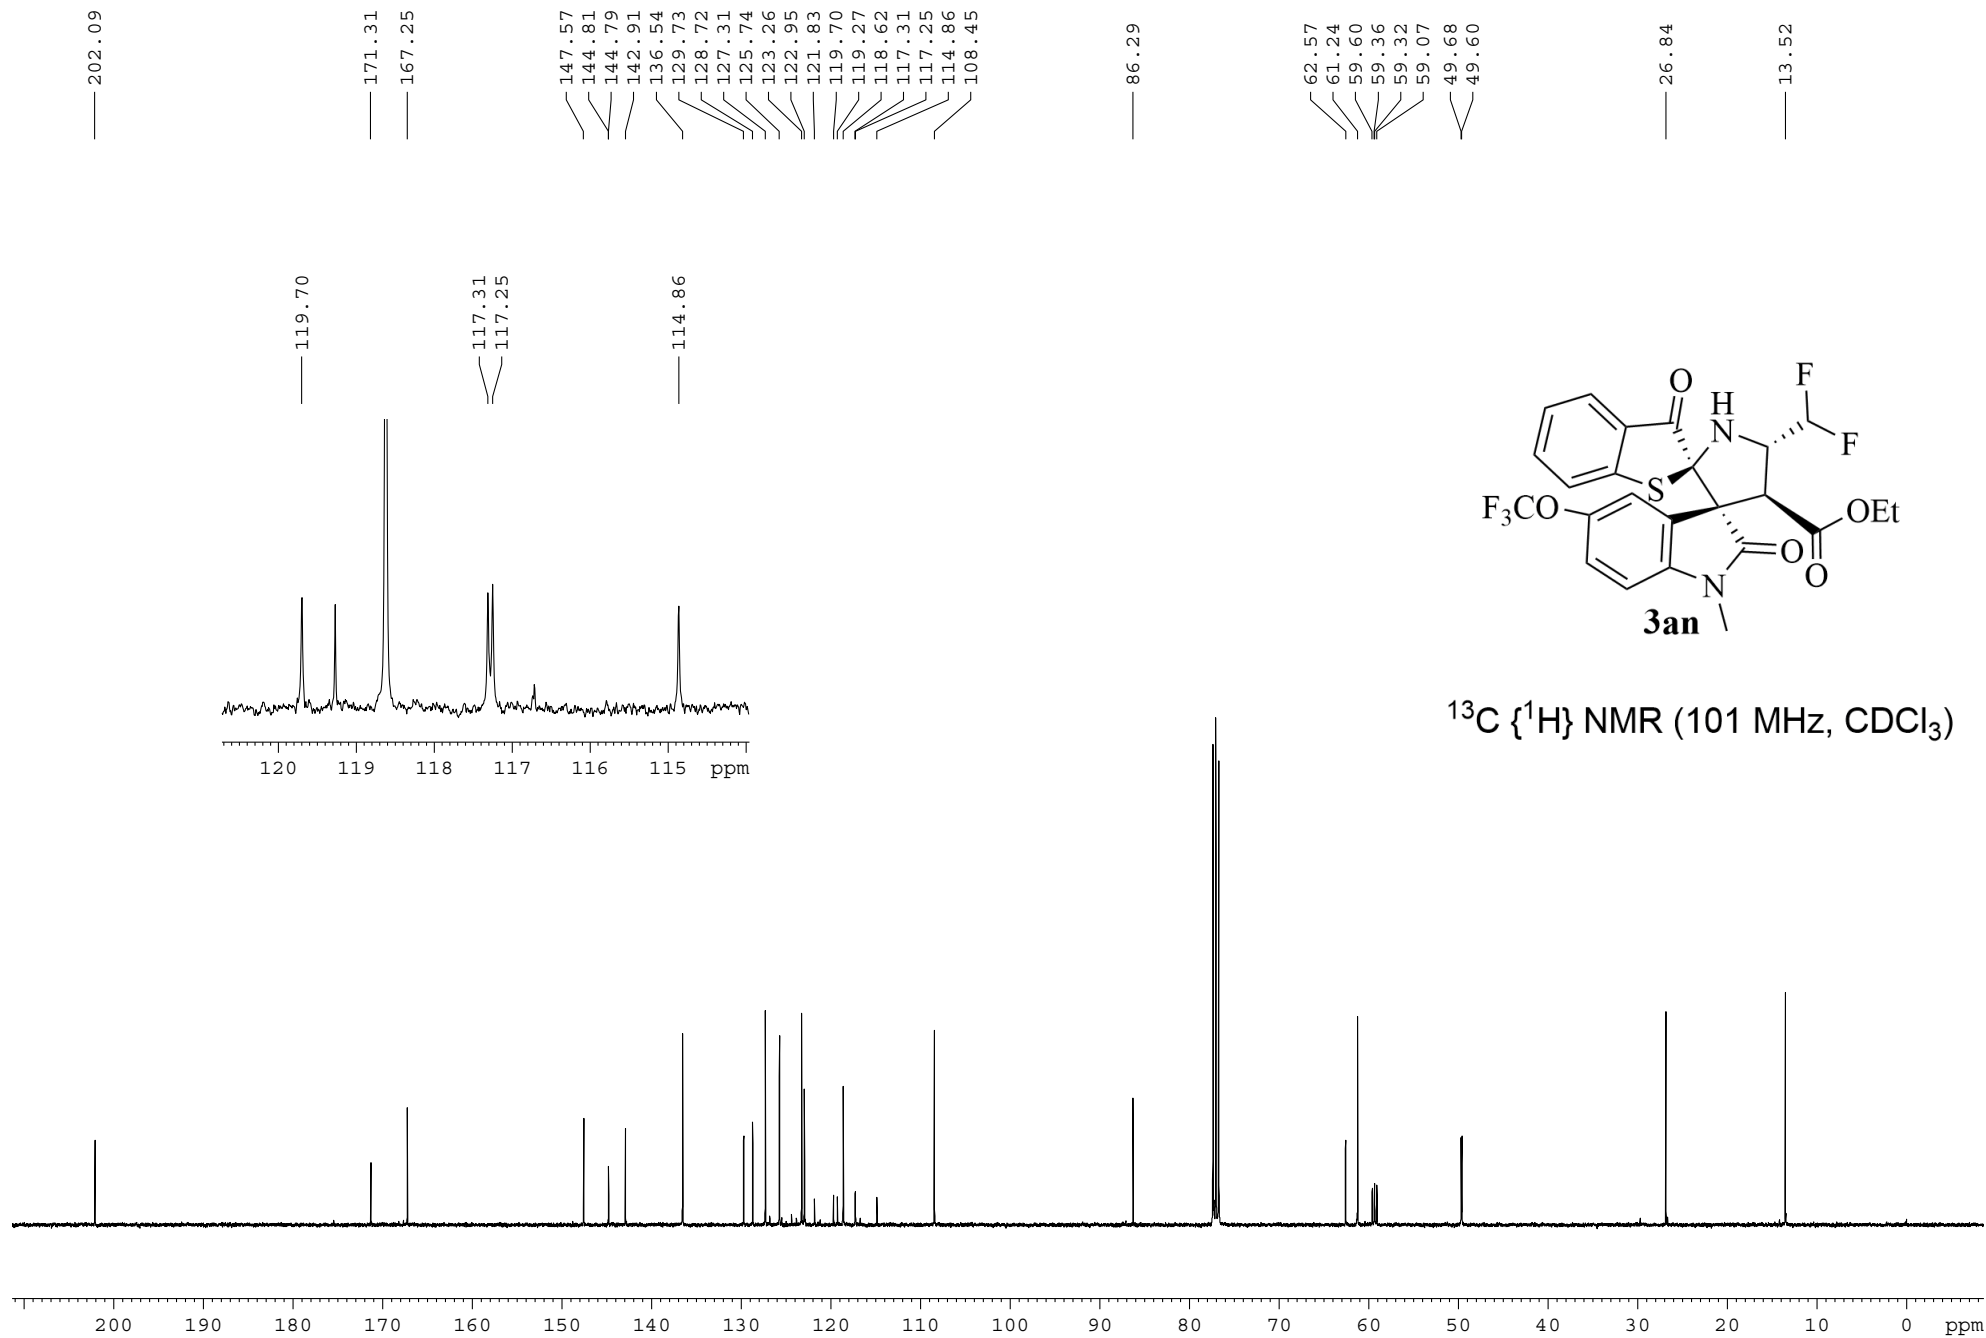

-58.436

-118.871  
-119.663  
-122.516  
-123.307

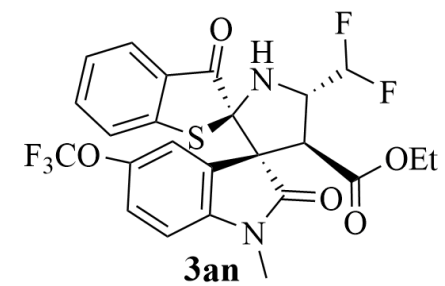

<sup>19</sup>F NMR (376 MHz, CDCl<sub>3</sub>)

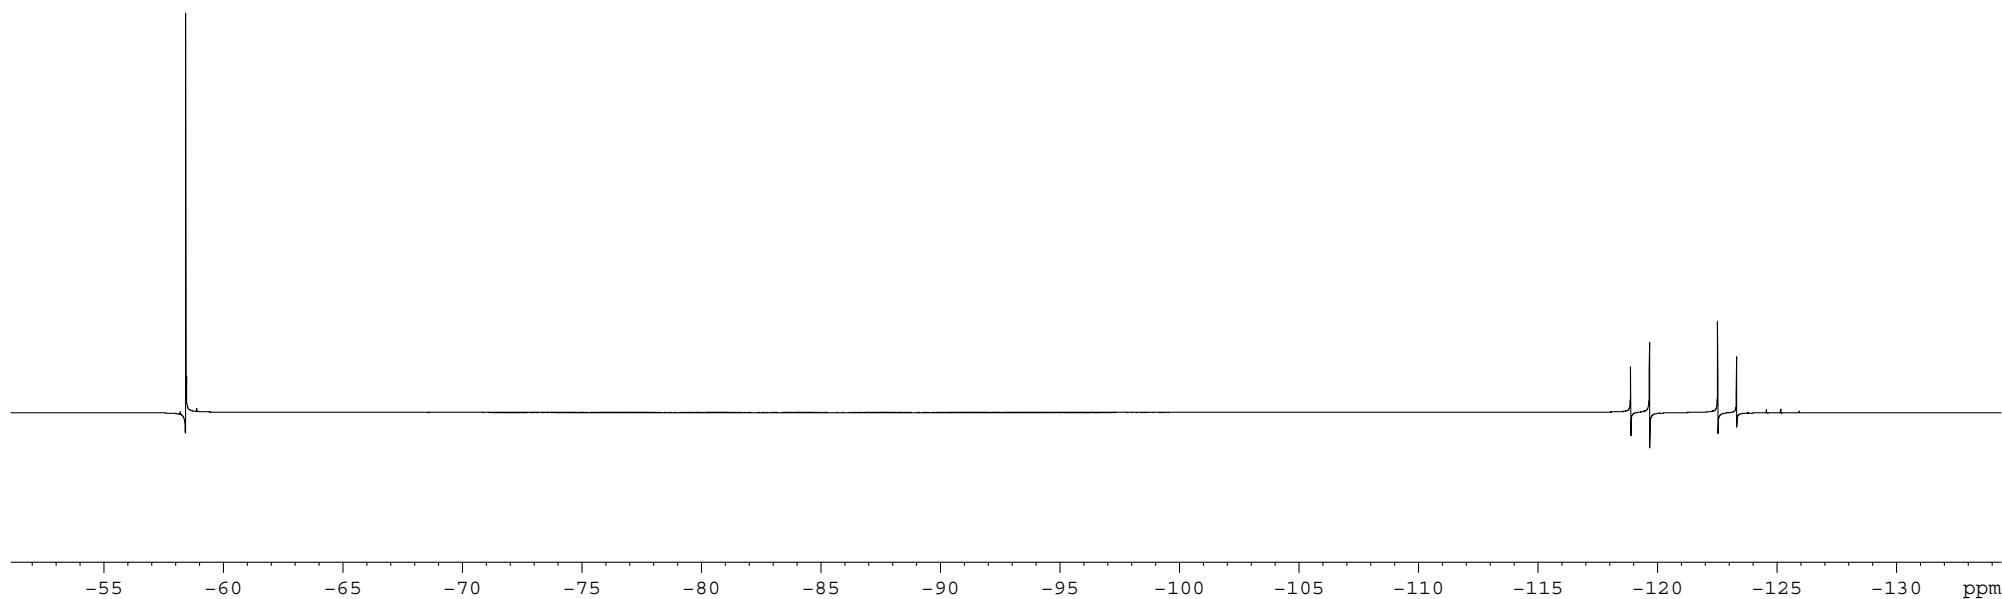

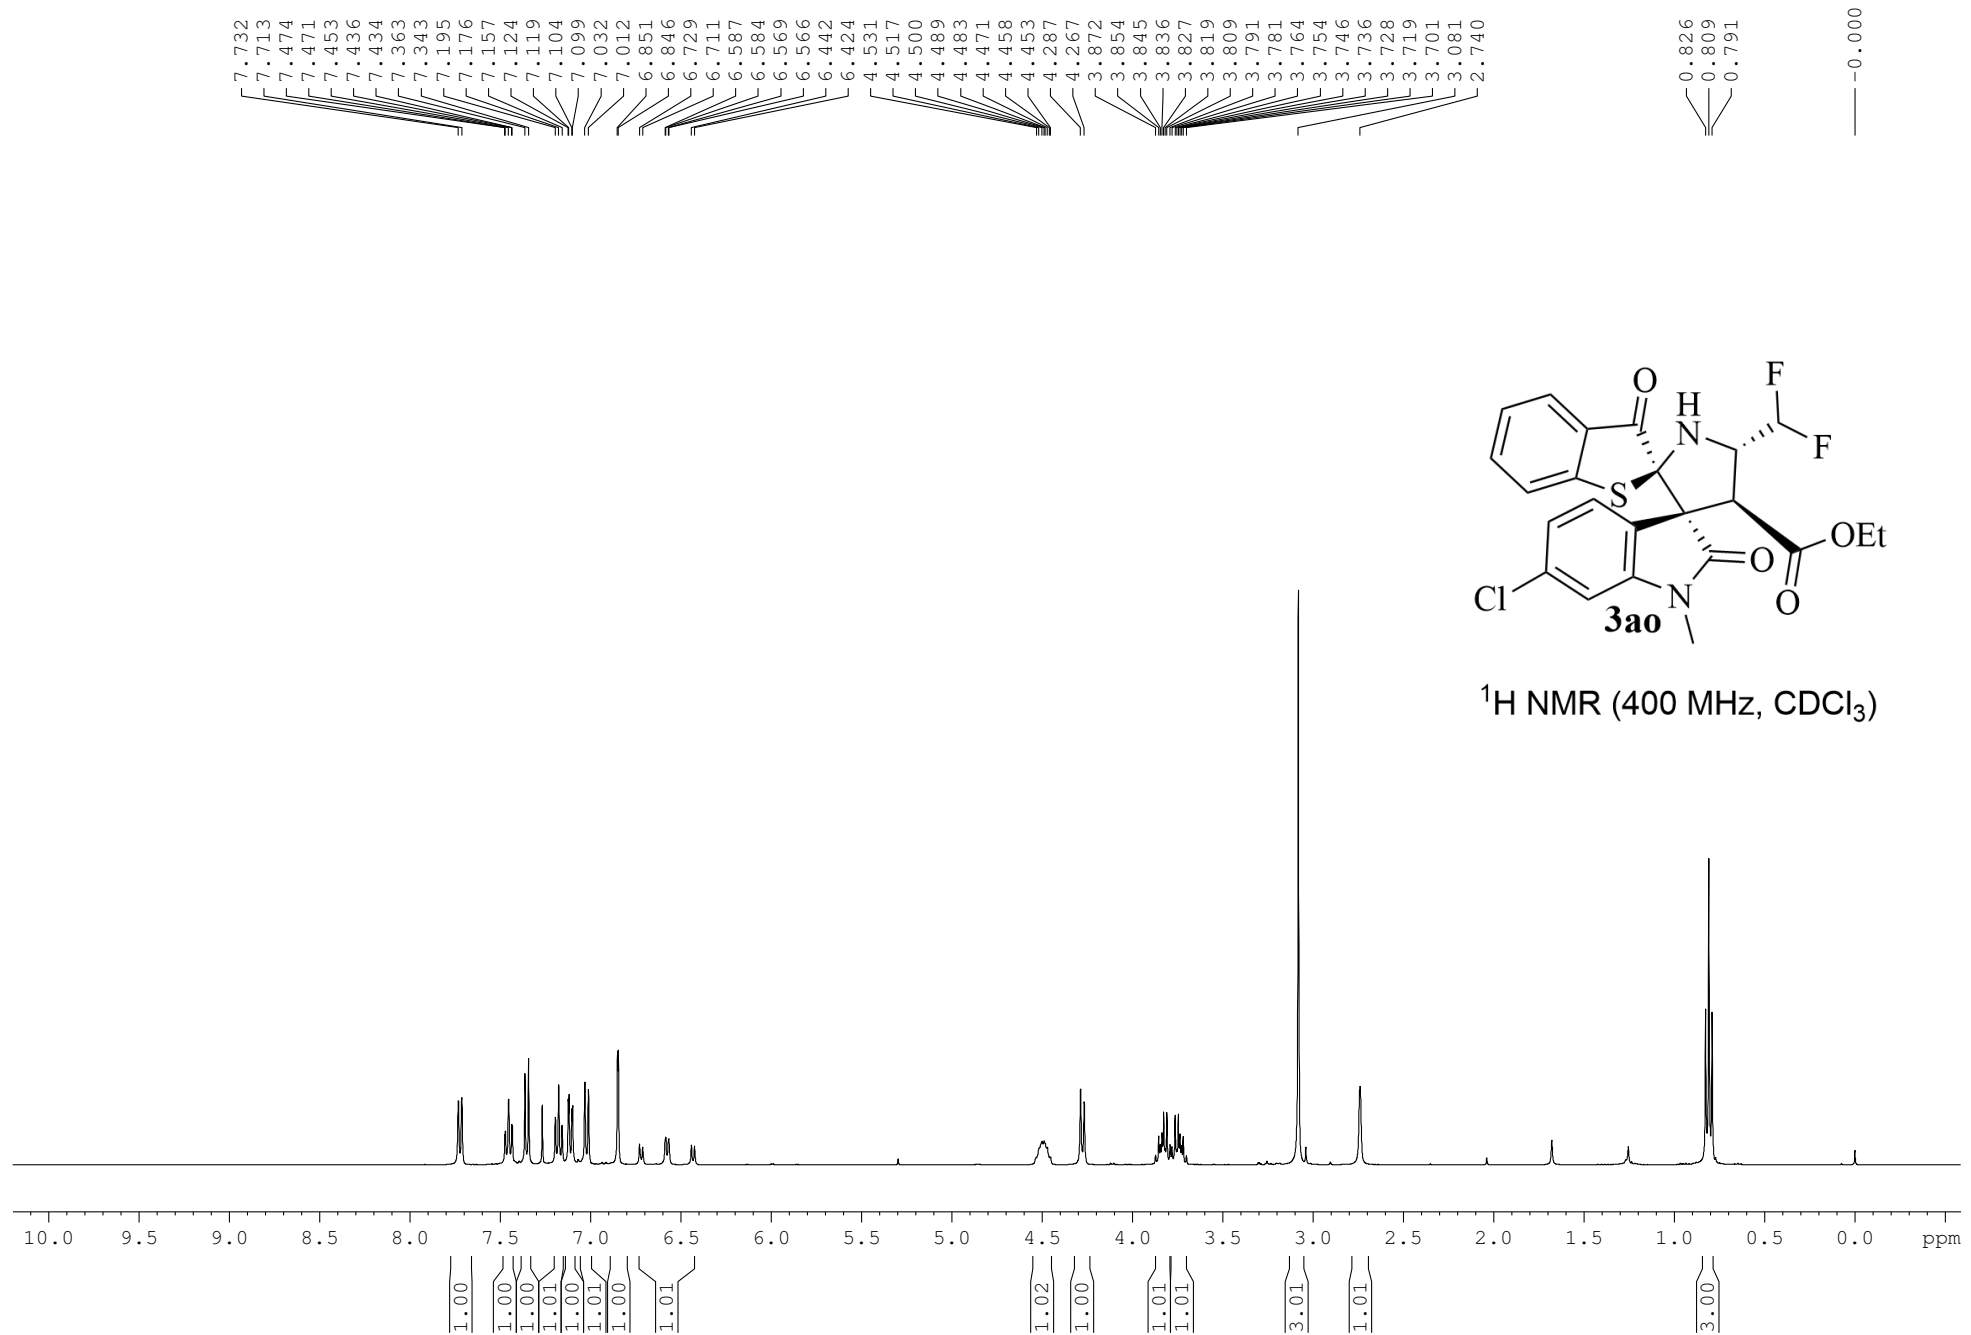

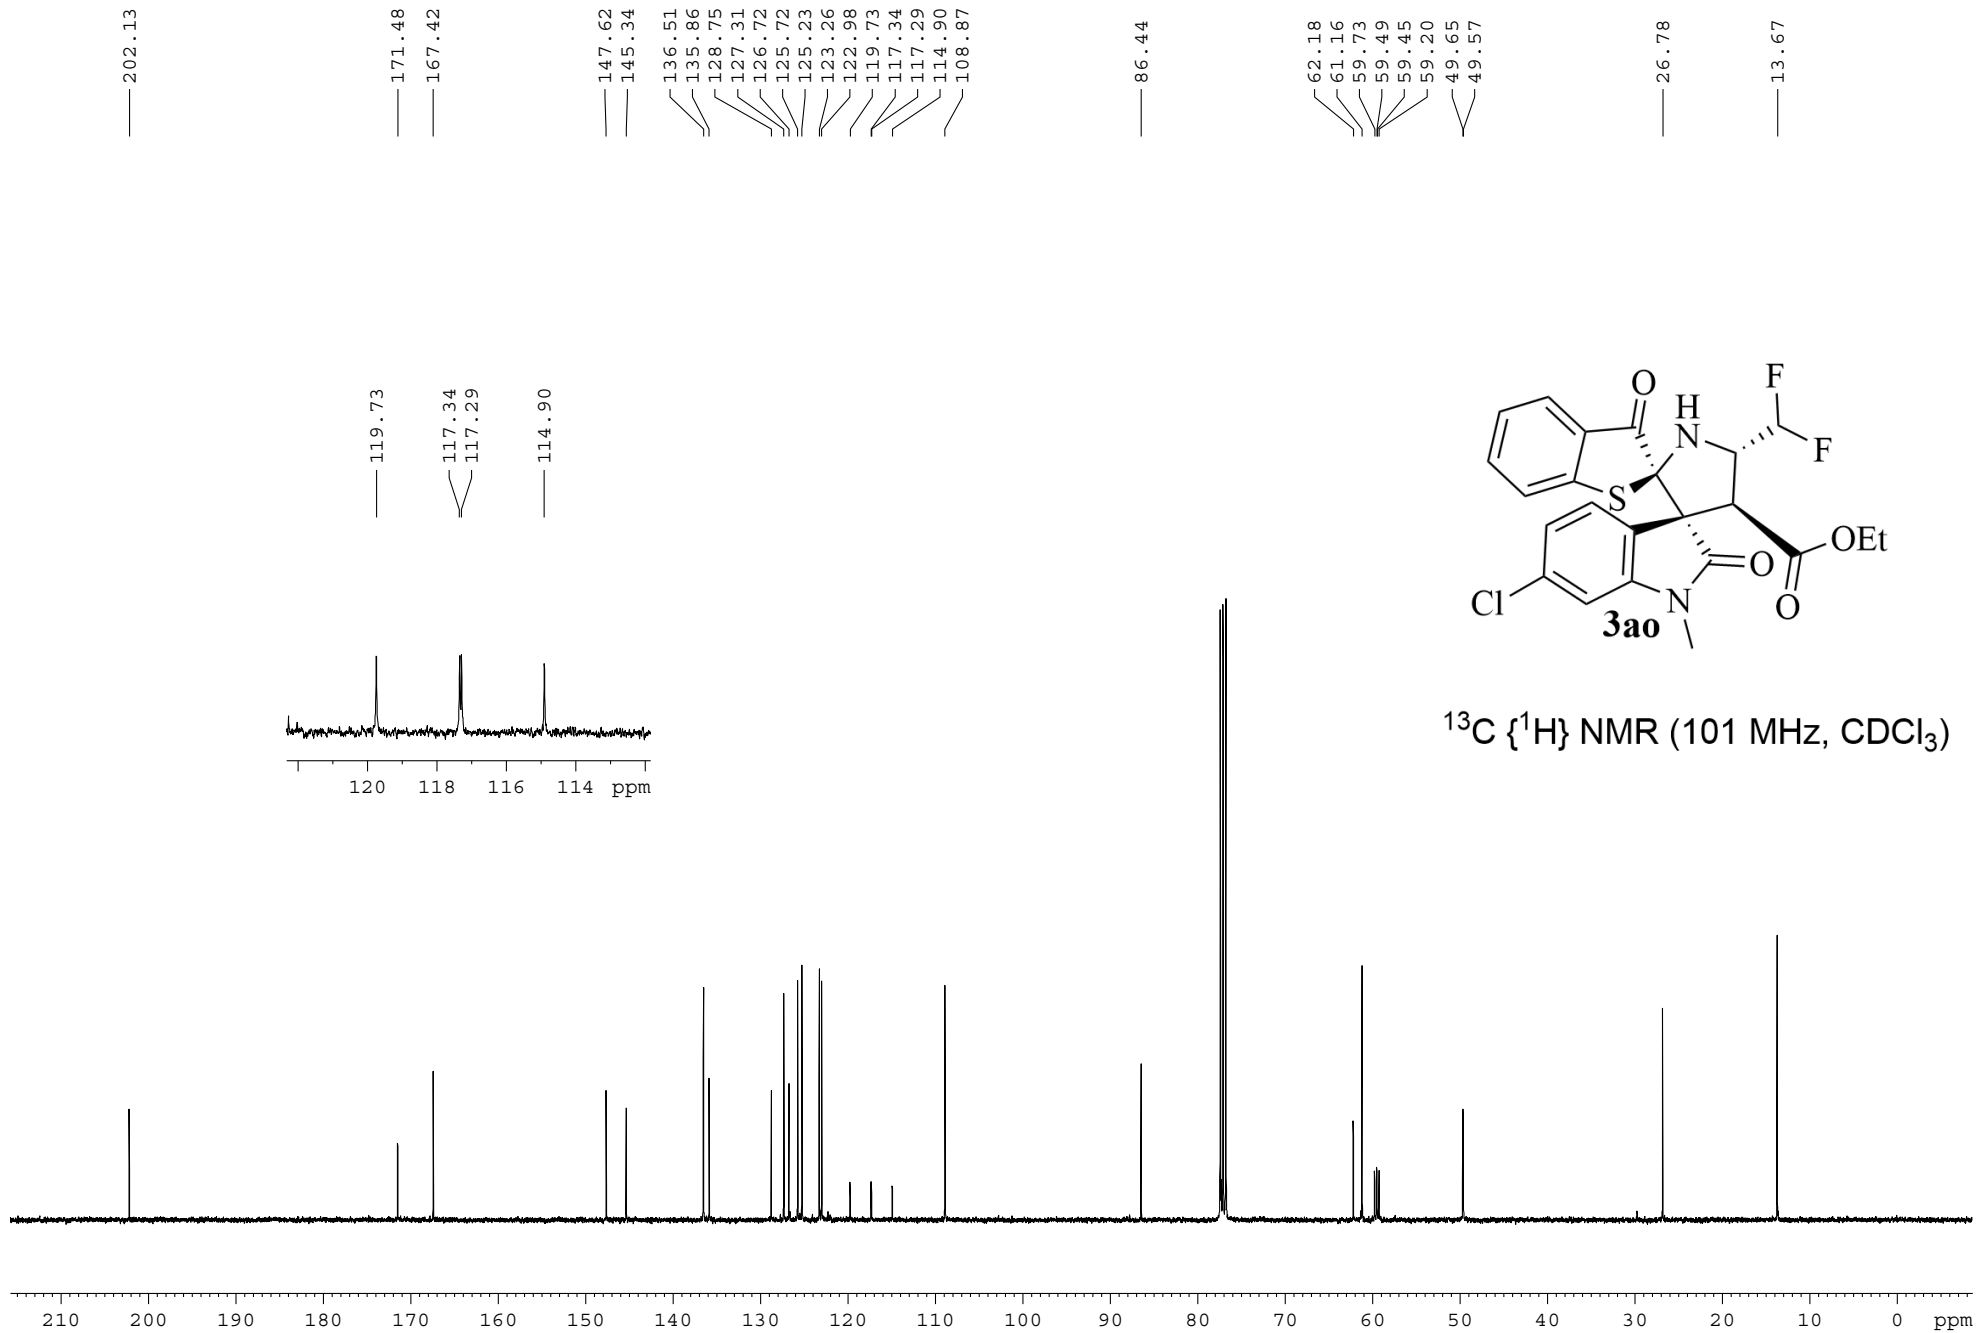



— -118.887

— -119.677

— -122.513

— -123.302

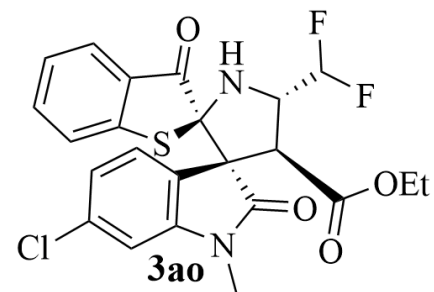

$^{19}\text{F}$  NMR (376 MHz,  $\text{CDCl}_3$ )

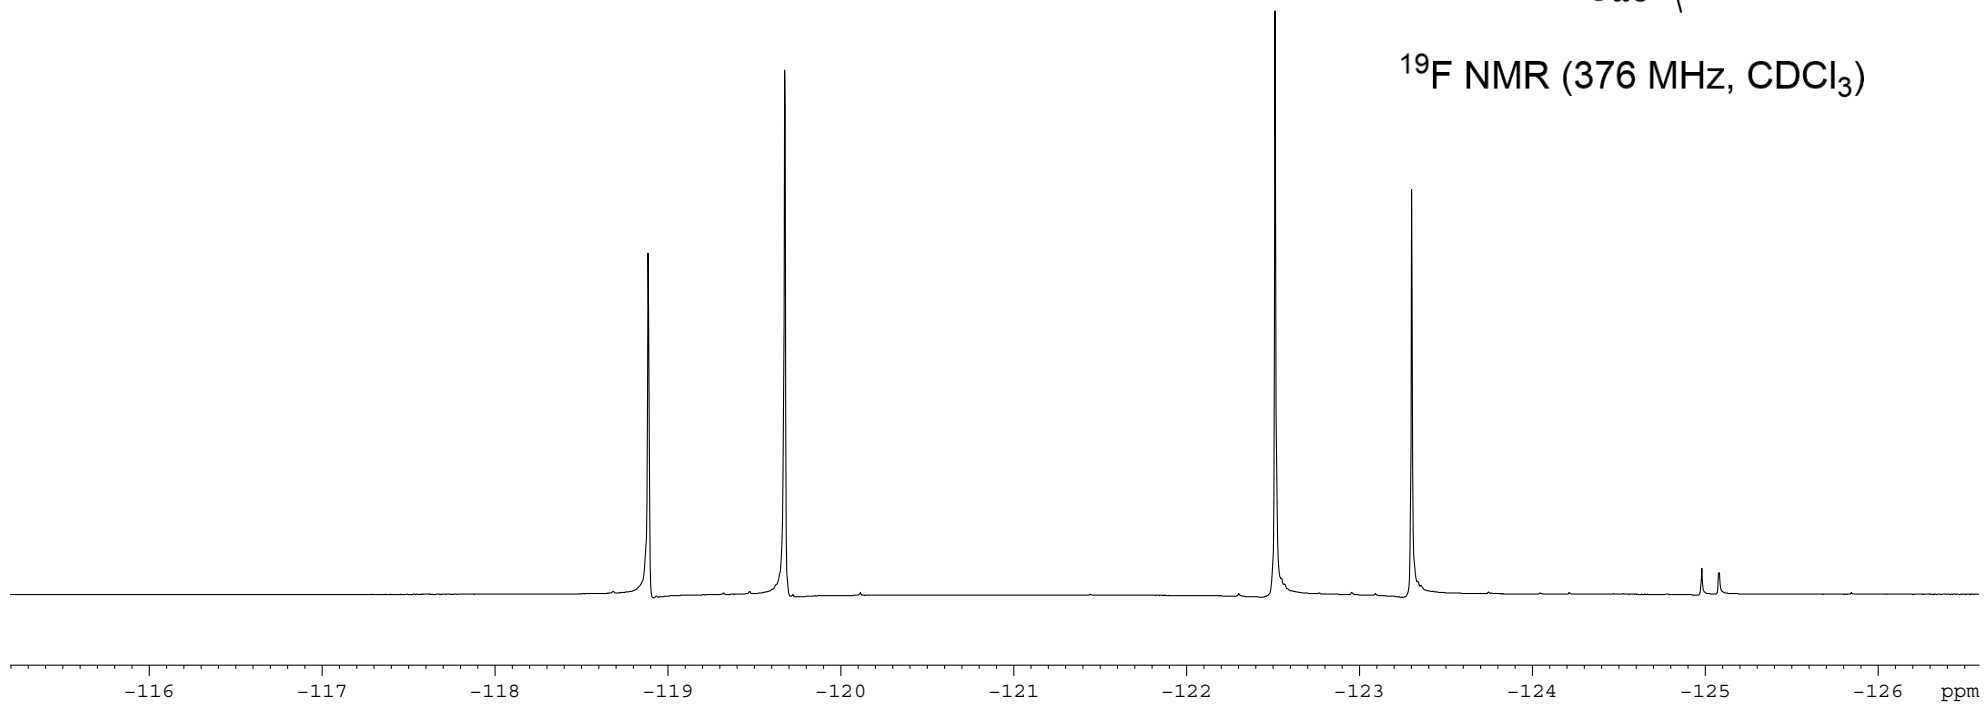

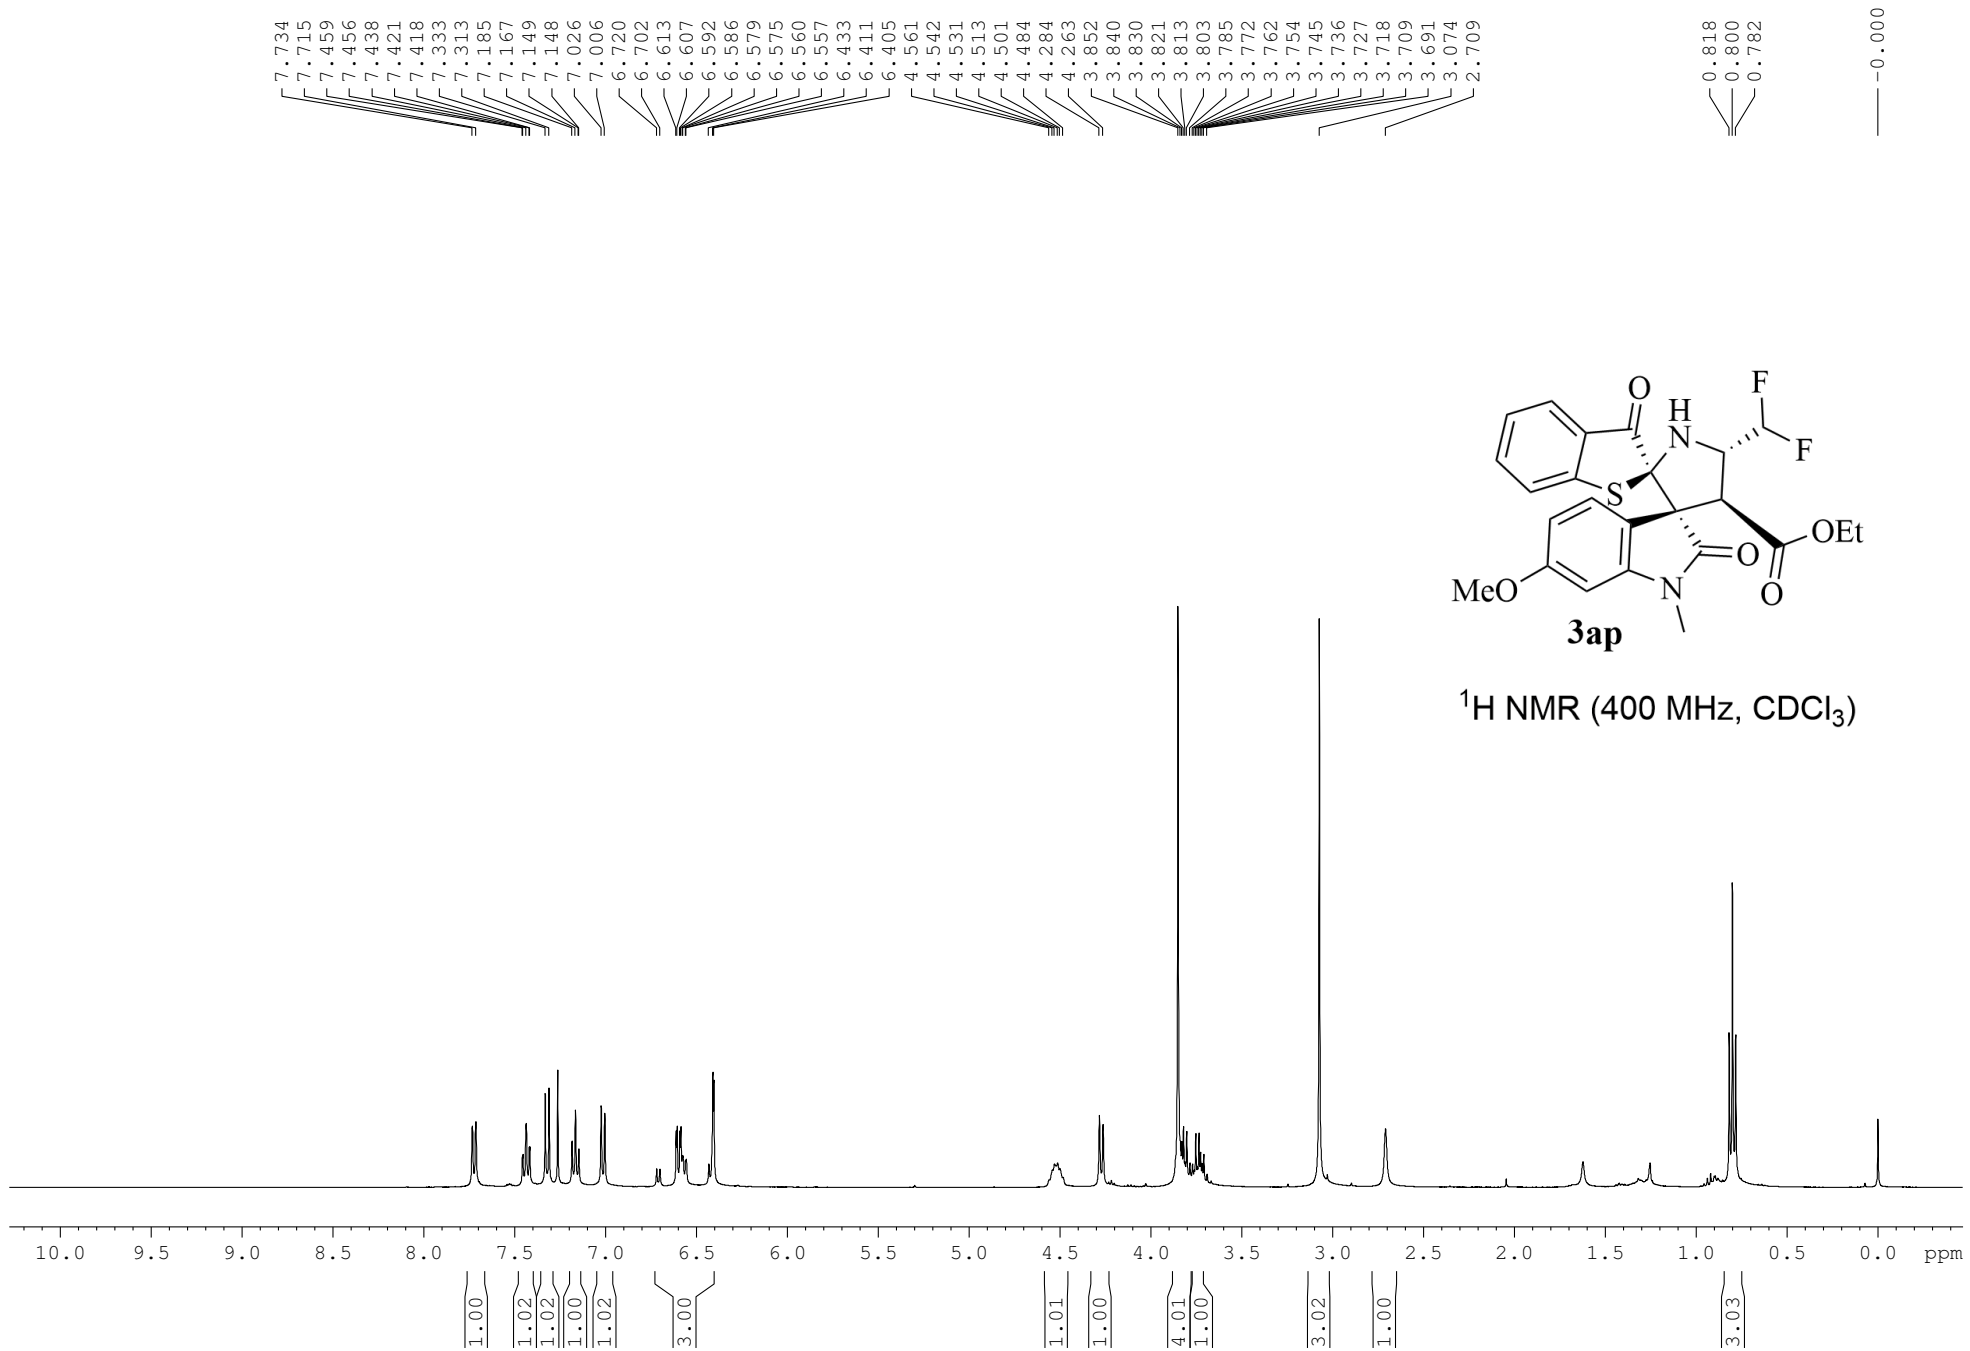

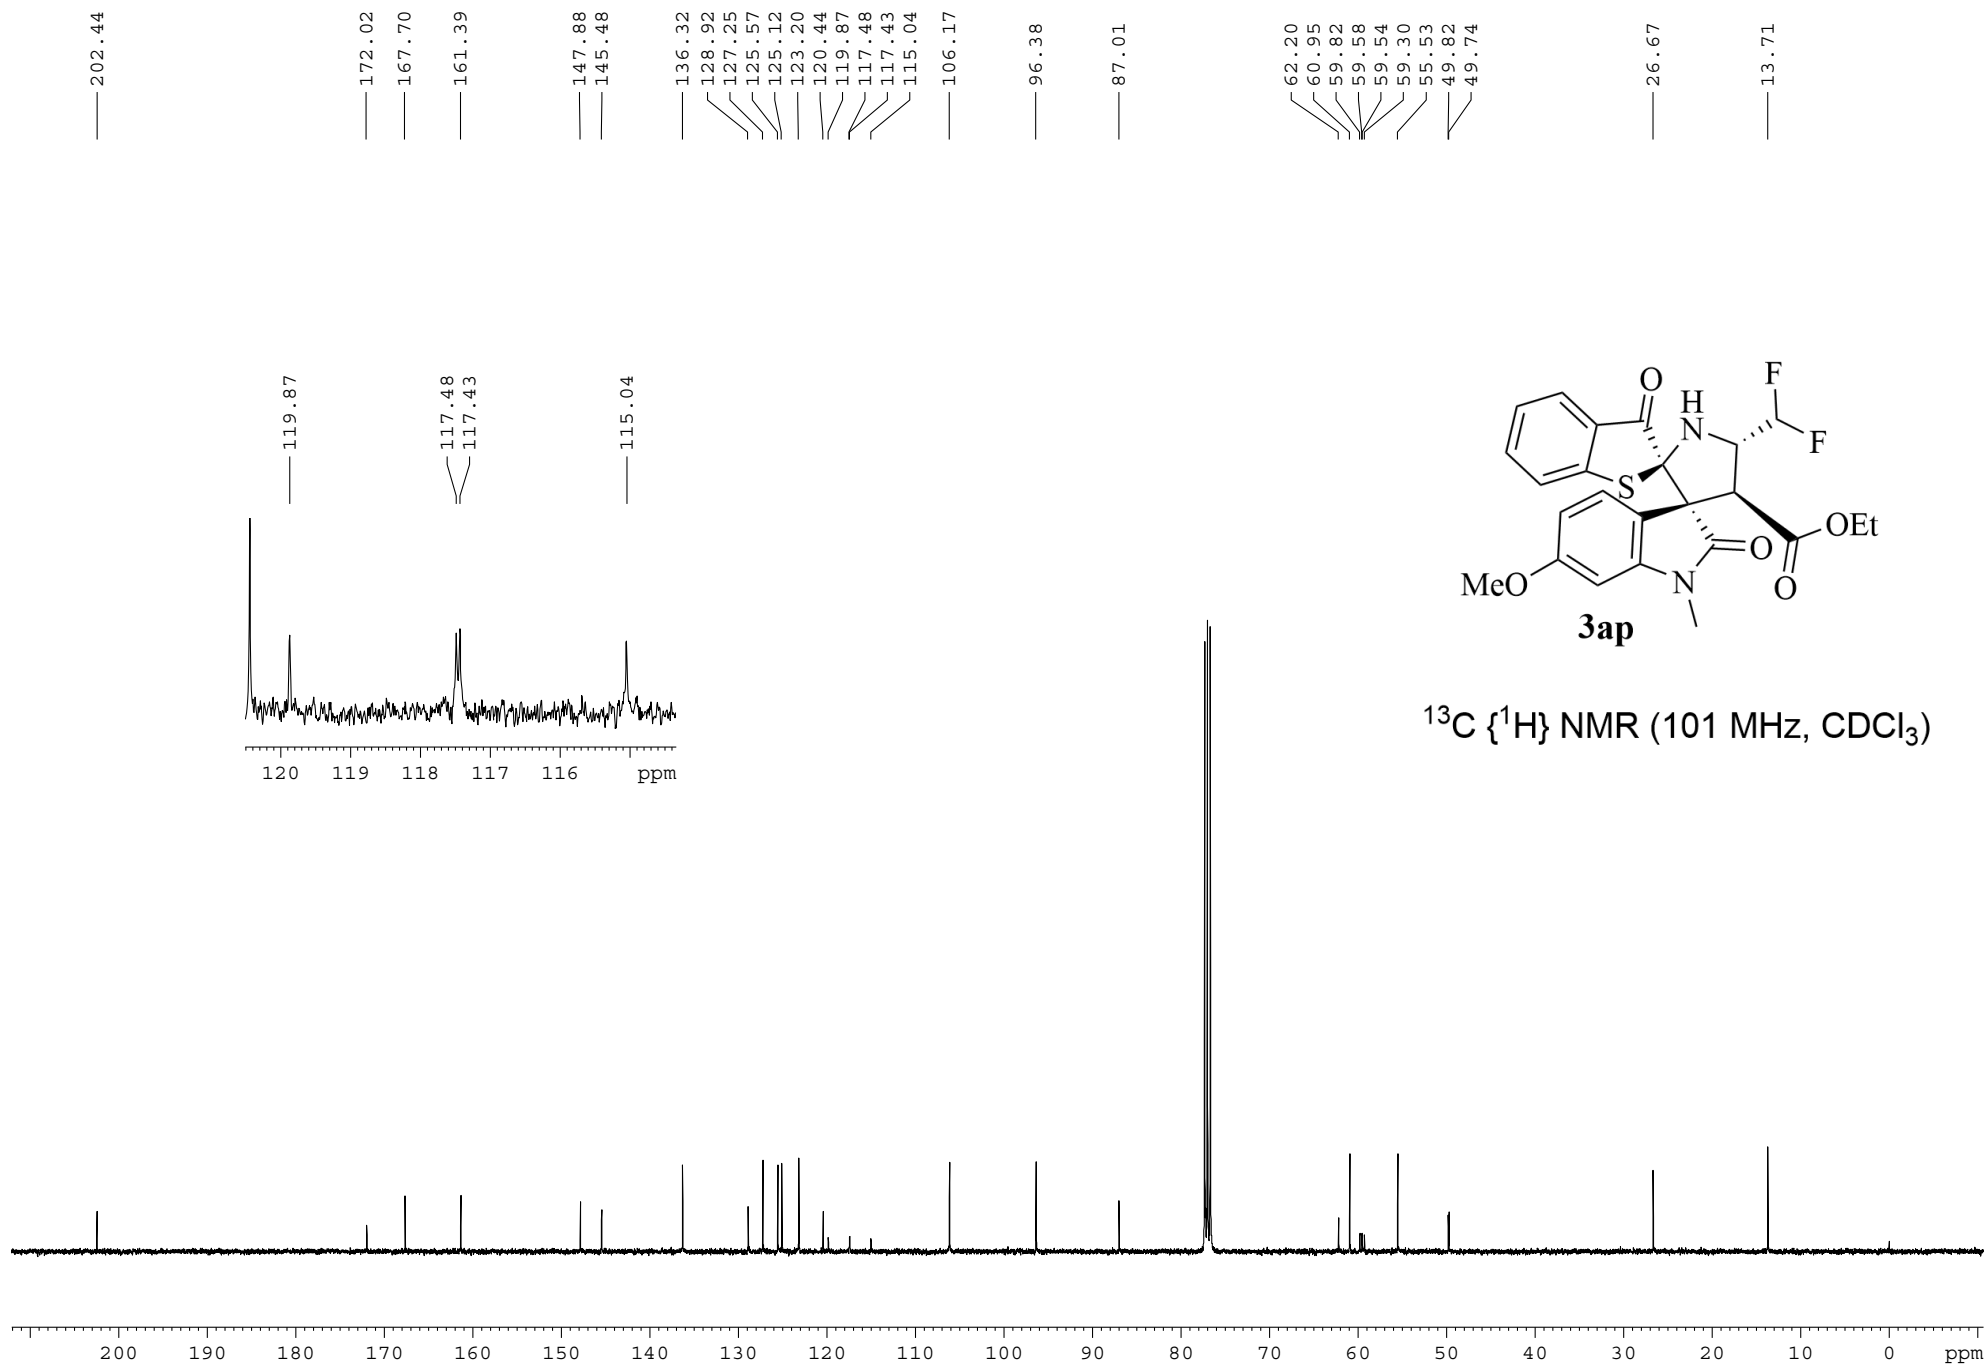

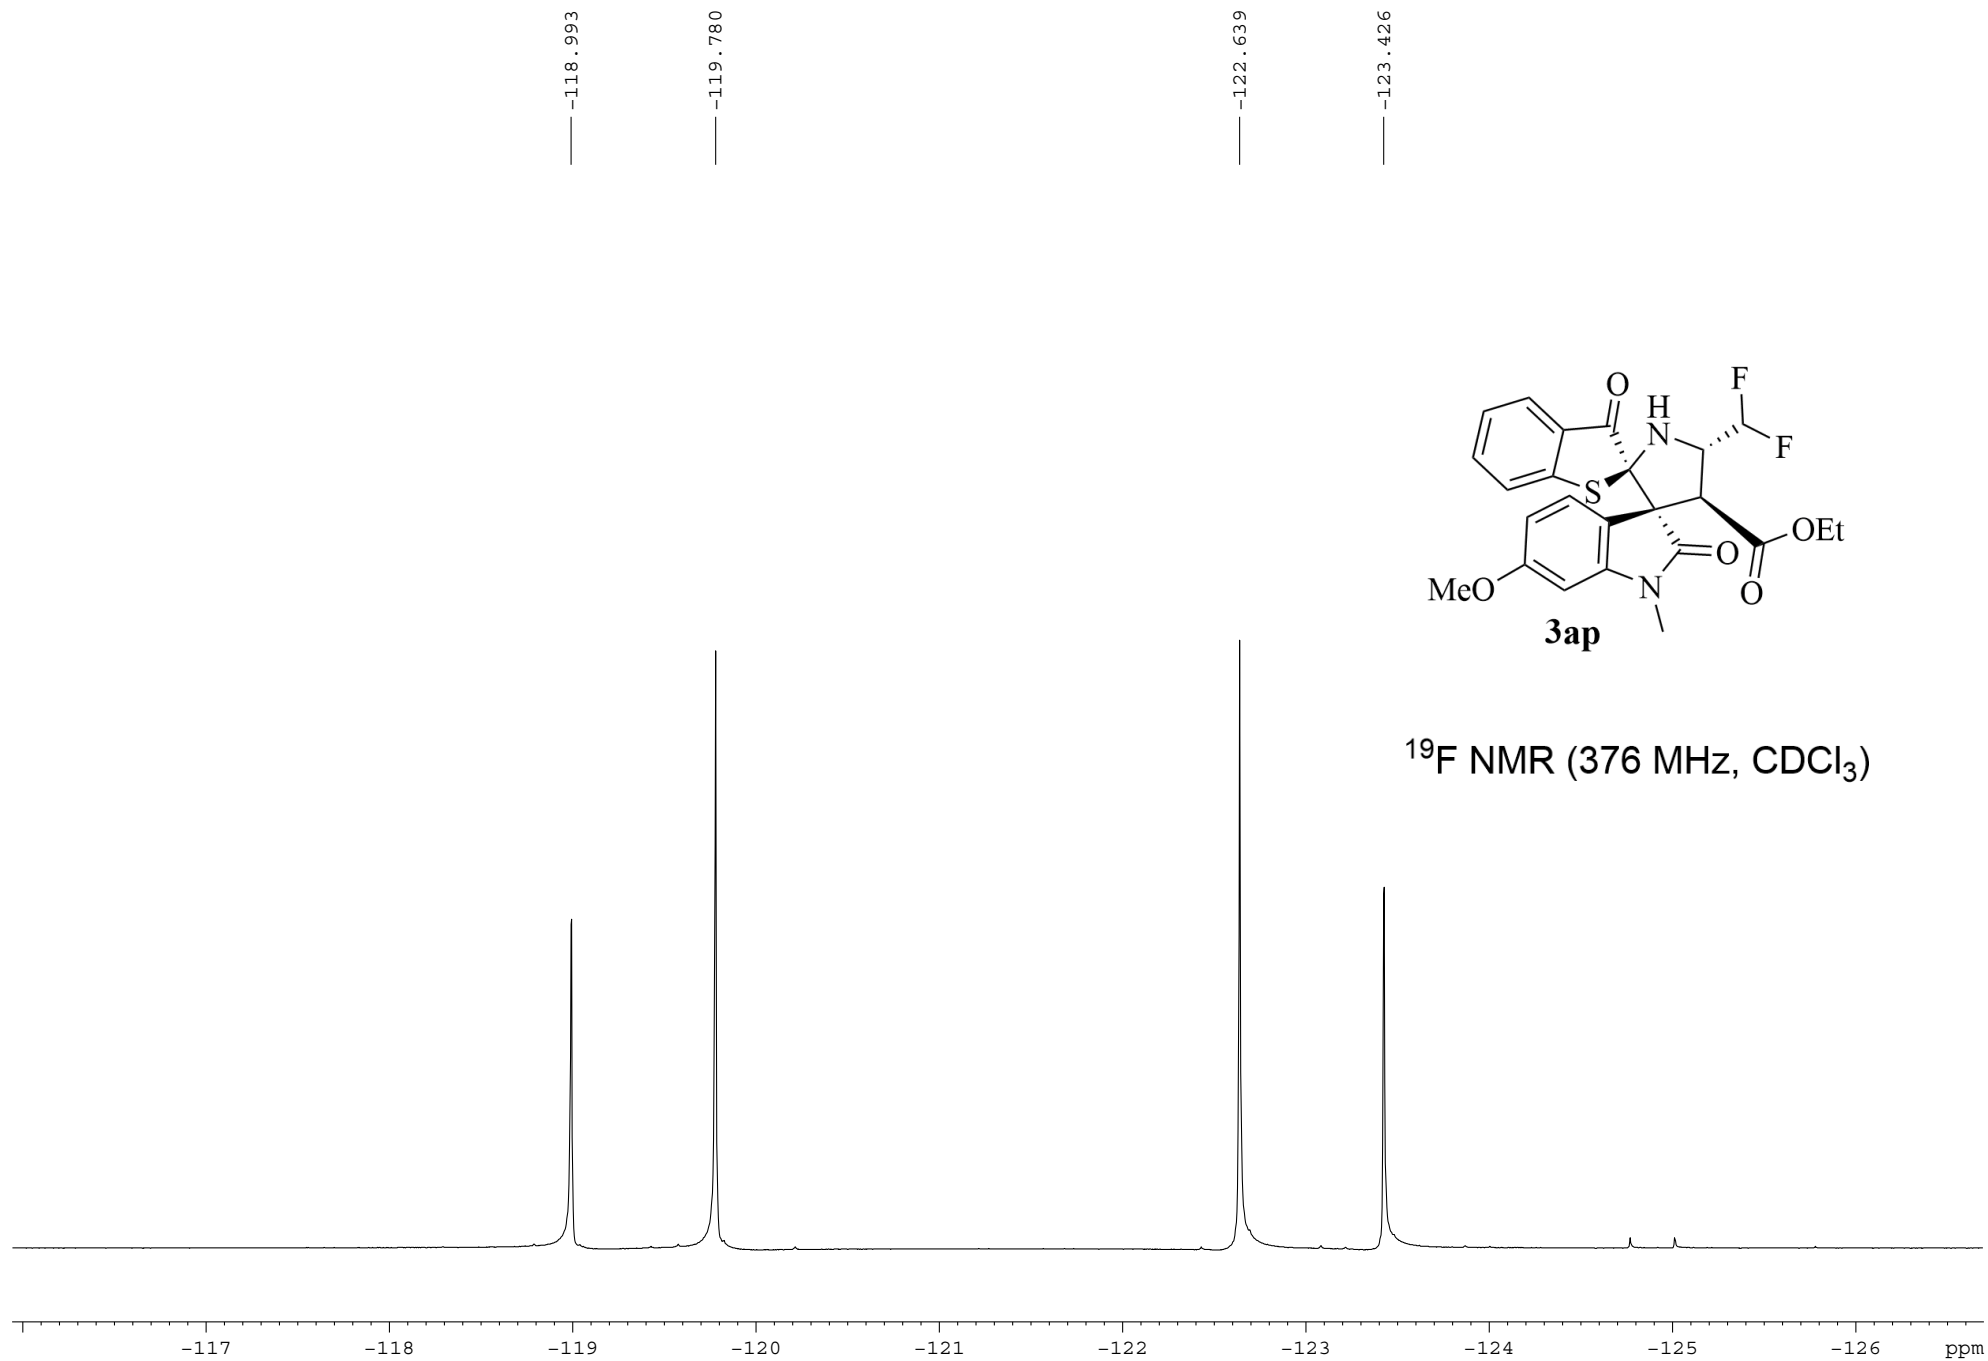

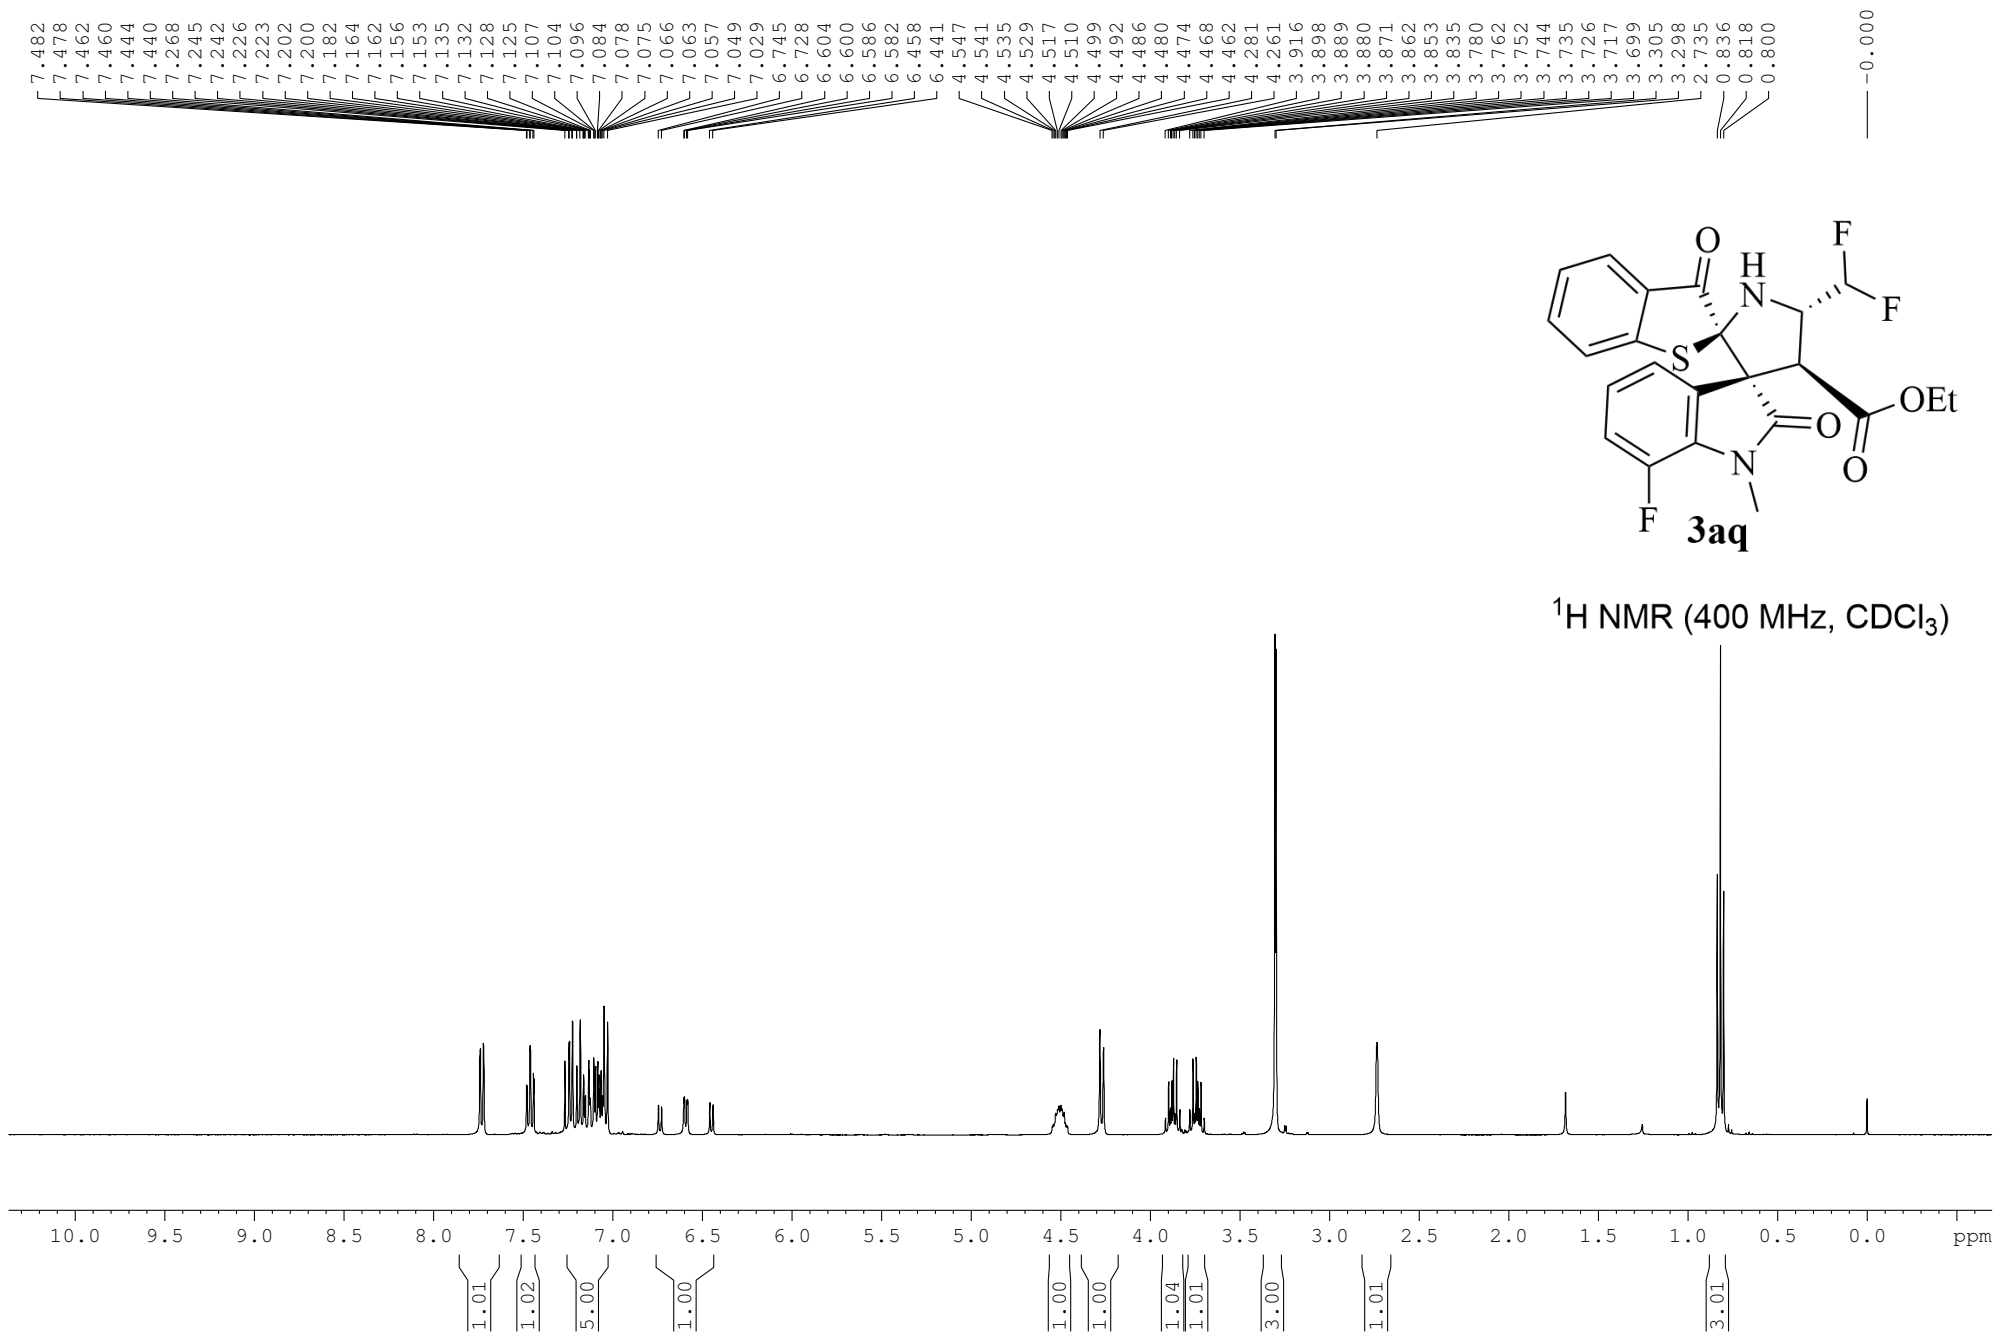

— 202.15

— 171.17  
— 167.40

148.72  
147.62  
146.29  
136.48  
131.11  
131.08  
130.92  
130.83  
128.73  
127.32  
125.72  
123.79  
123.72  
123.28  
120.12  
120.08  
119.77  
118.02  
117.83  
117.39  
117.33  
114.94

— 86.51

62.65  
61.12  
59.75  
59.51  
59.47  
59.23  
49.91  
49.83

29.21  
29.15

— 13.61

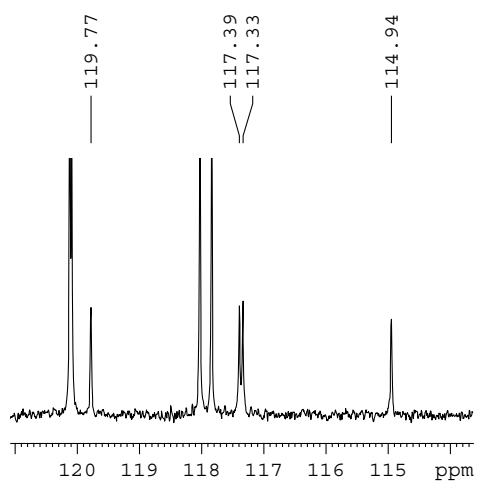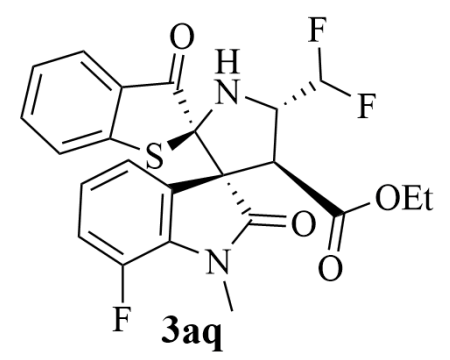

<sup>13</sup>C {<sup>1</sup>H} NMR (101 MHz, CDCl<sub>3</sub>)

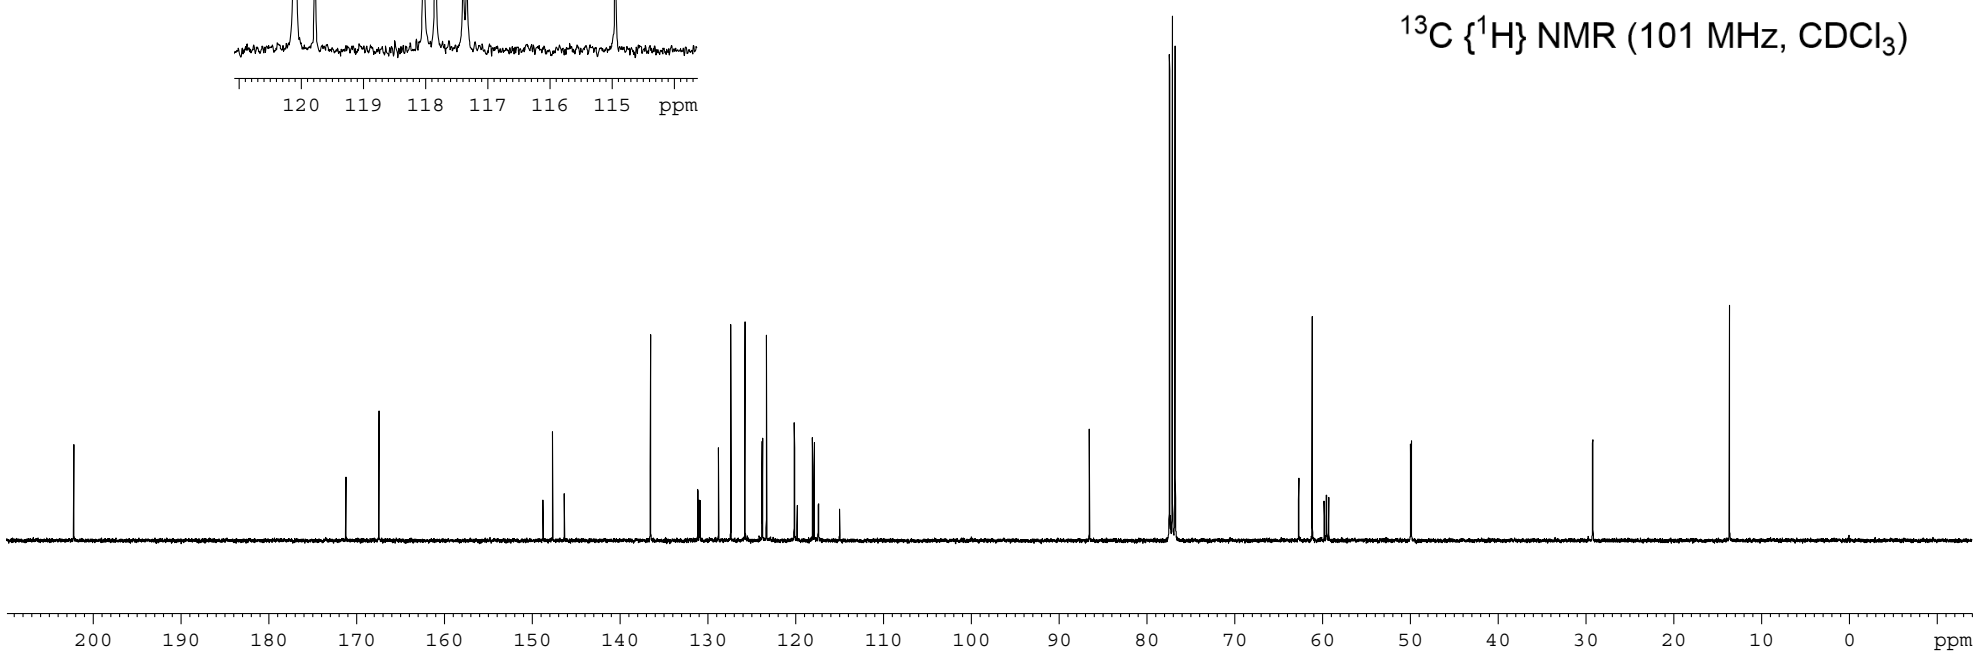

— -118.882

— -119.670

— -122.570

— -123.359

— -136.234

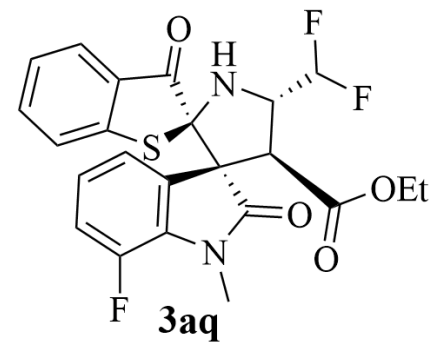

$^{19}\text{F}$  NMR (376 MHz,  $\text{CDCl}_3$ )

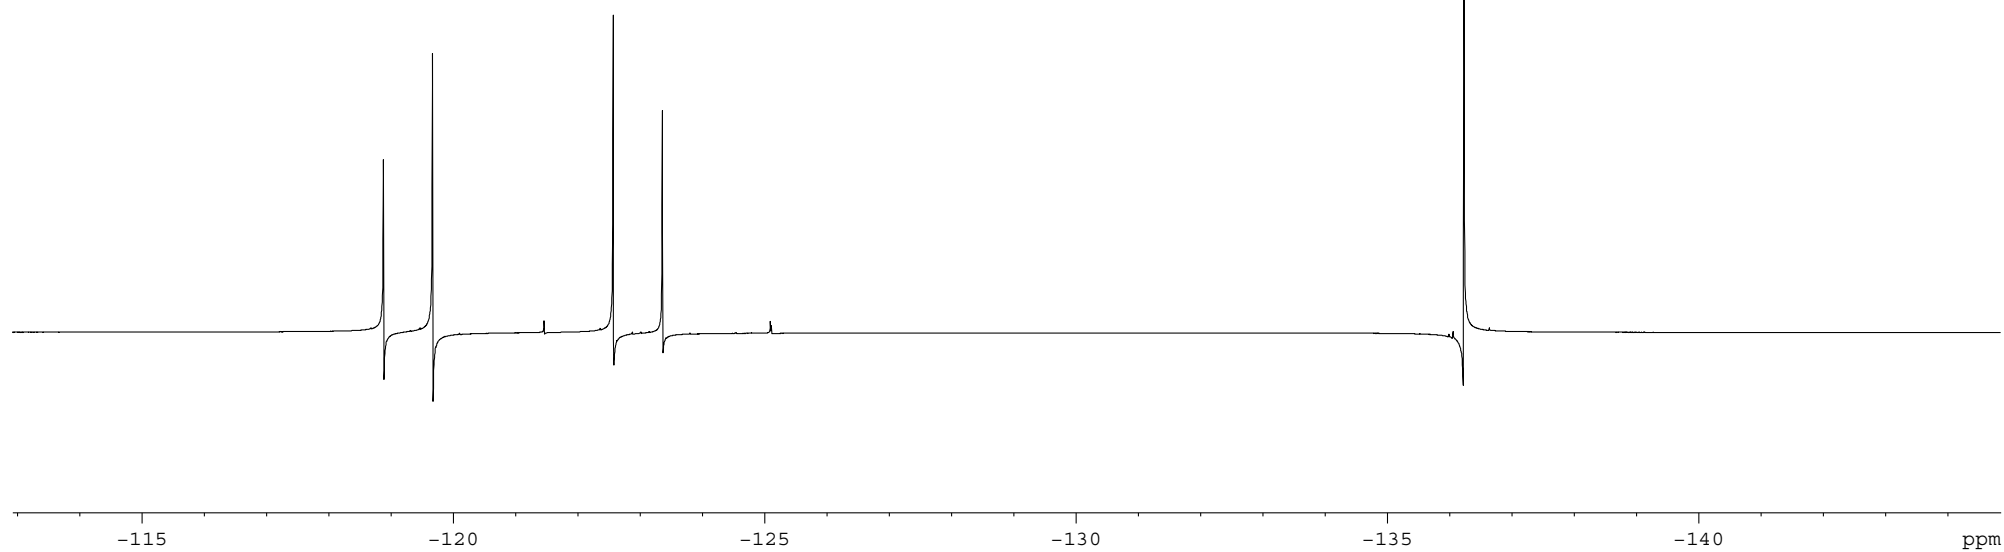

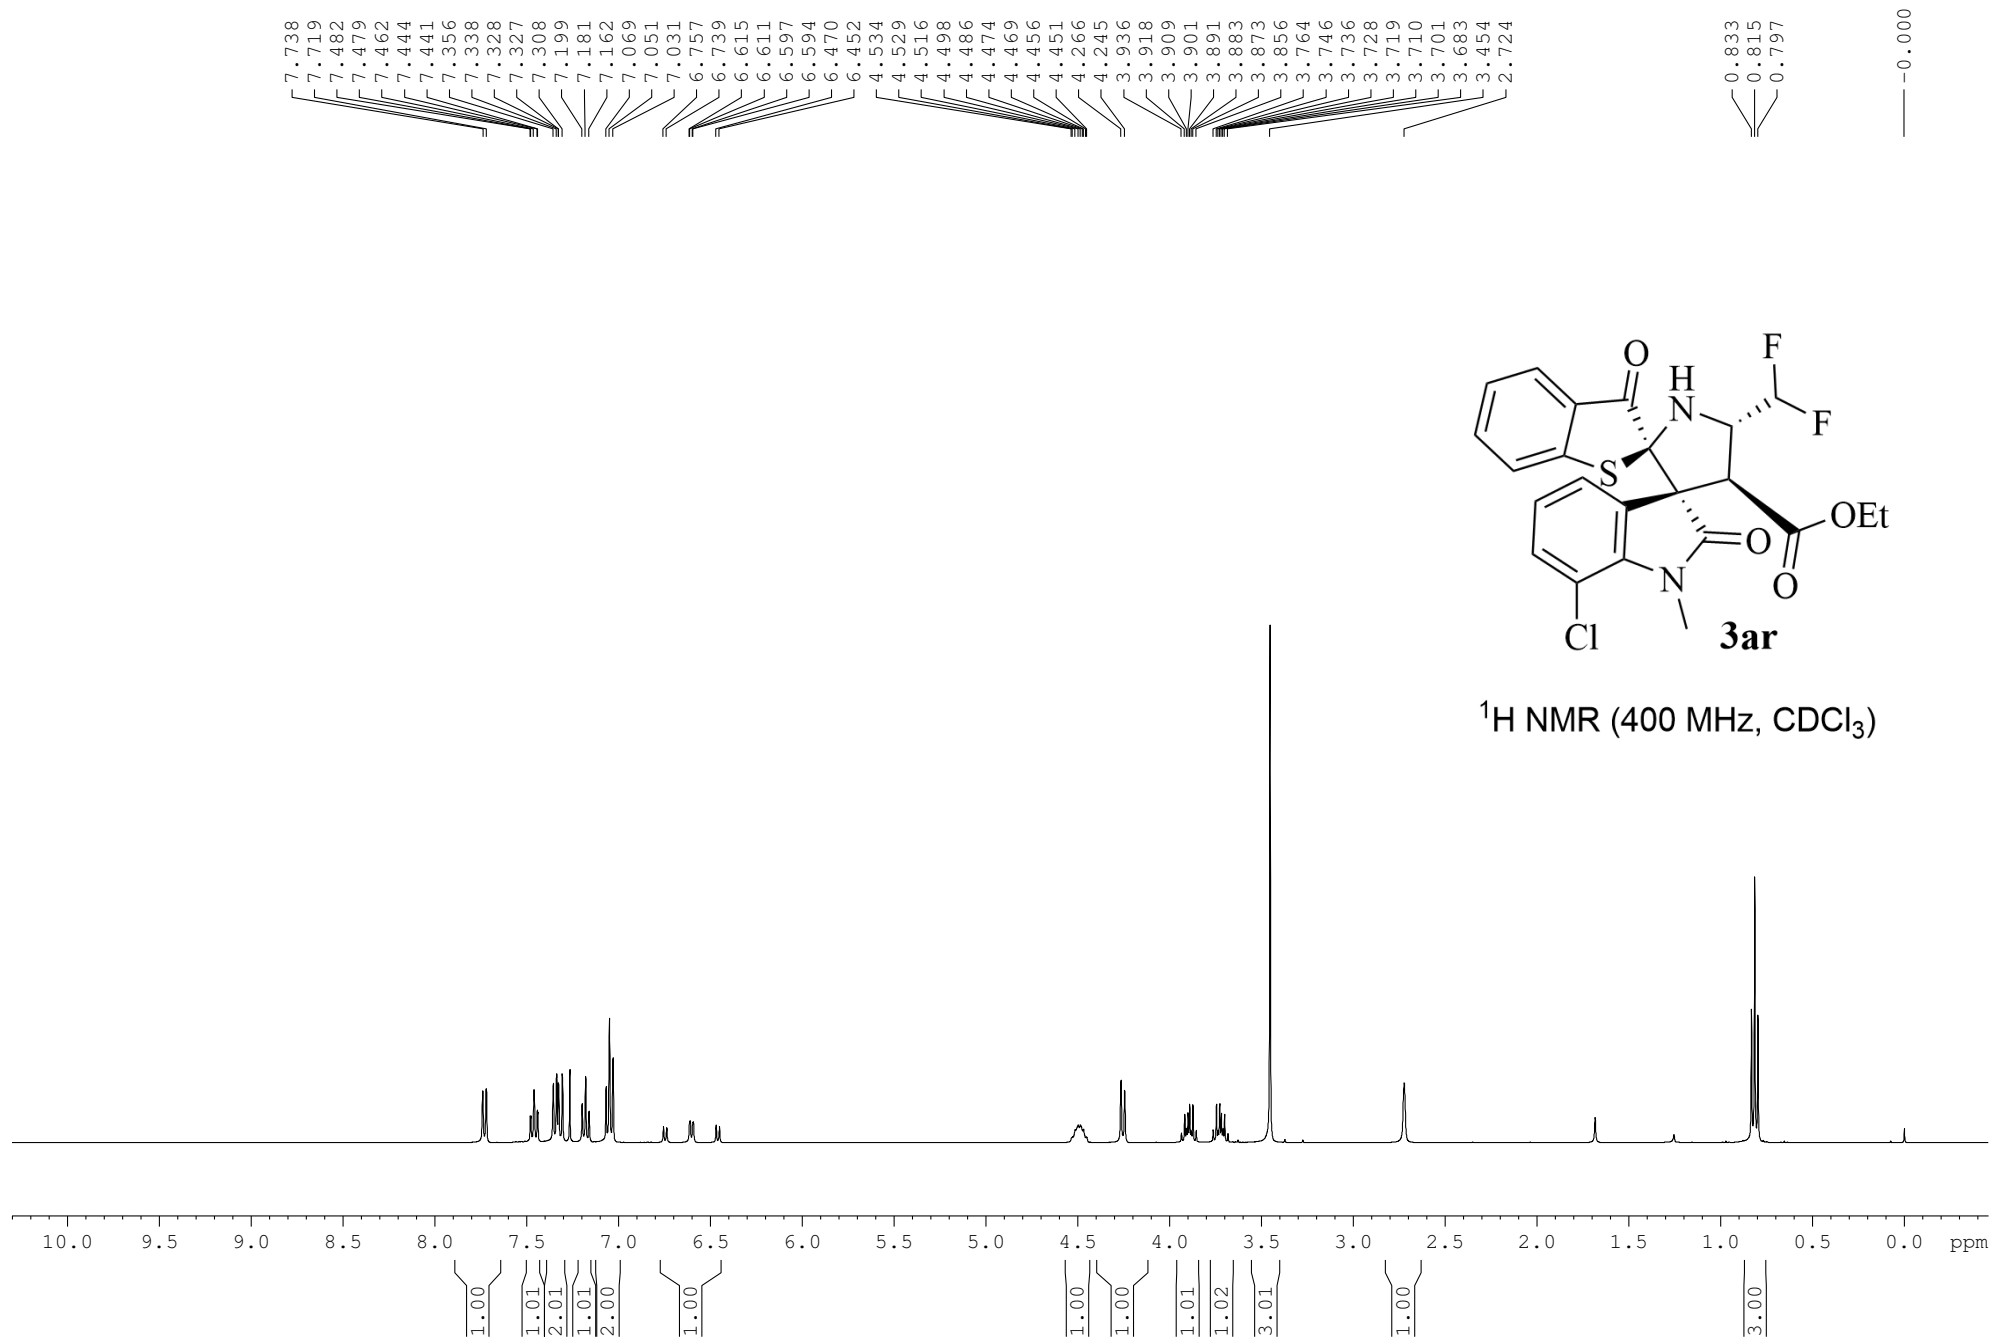



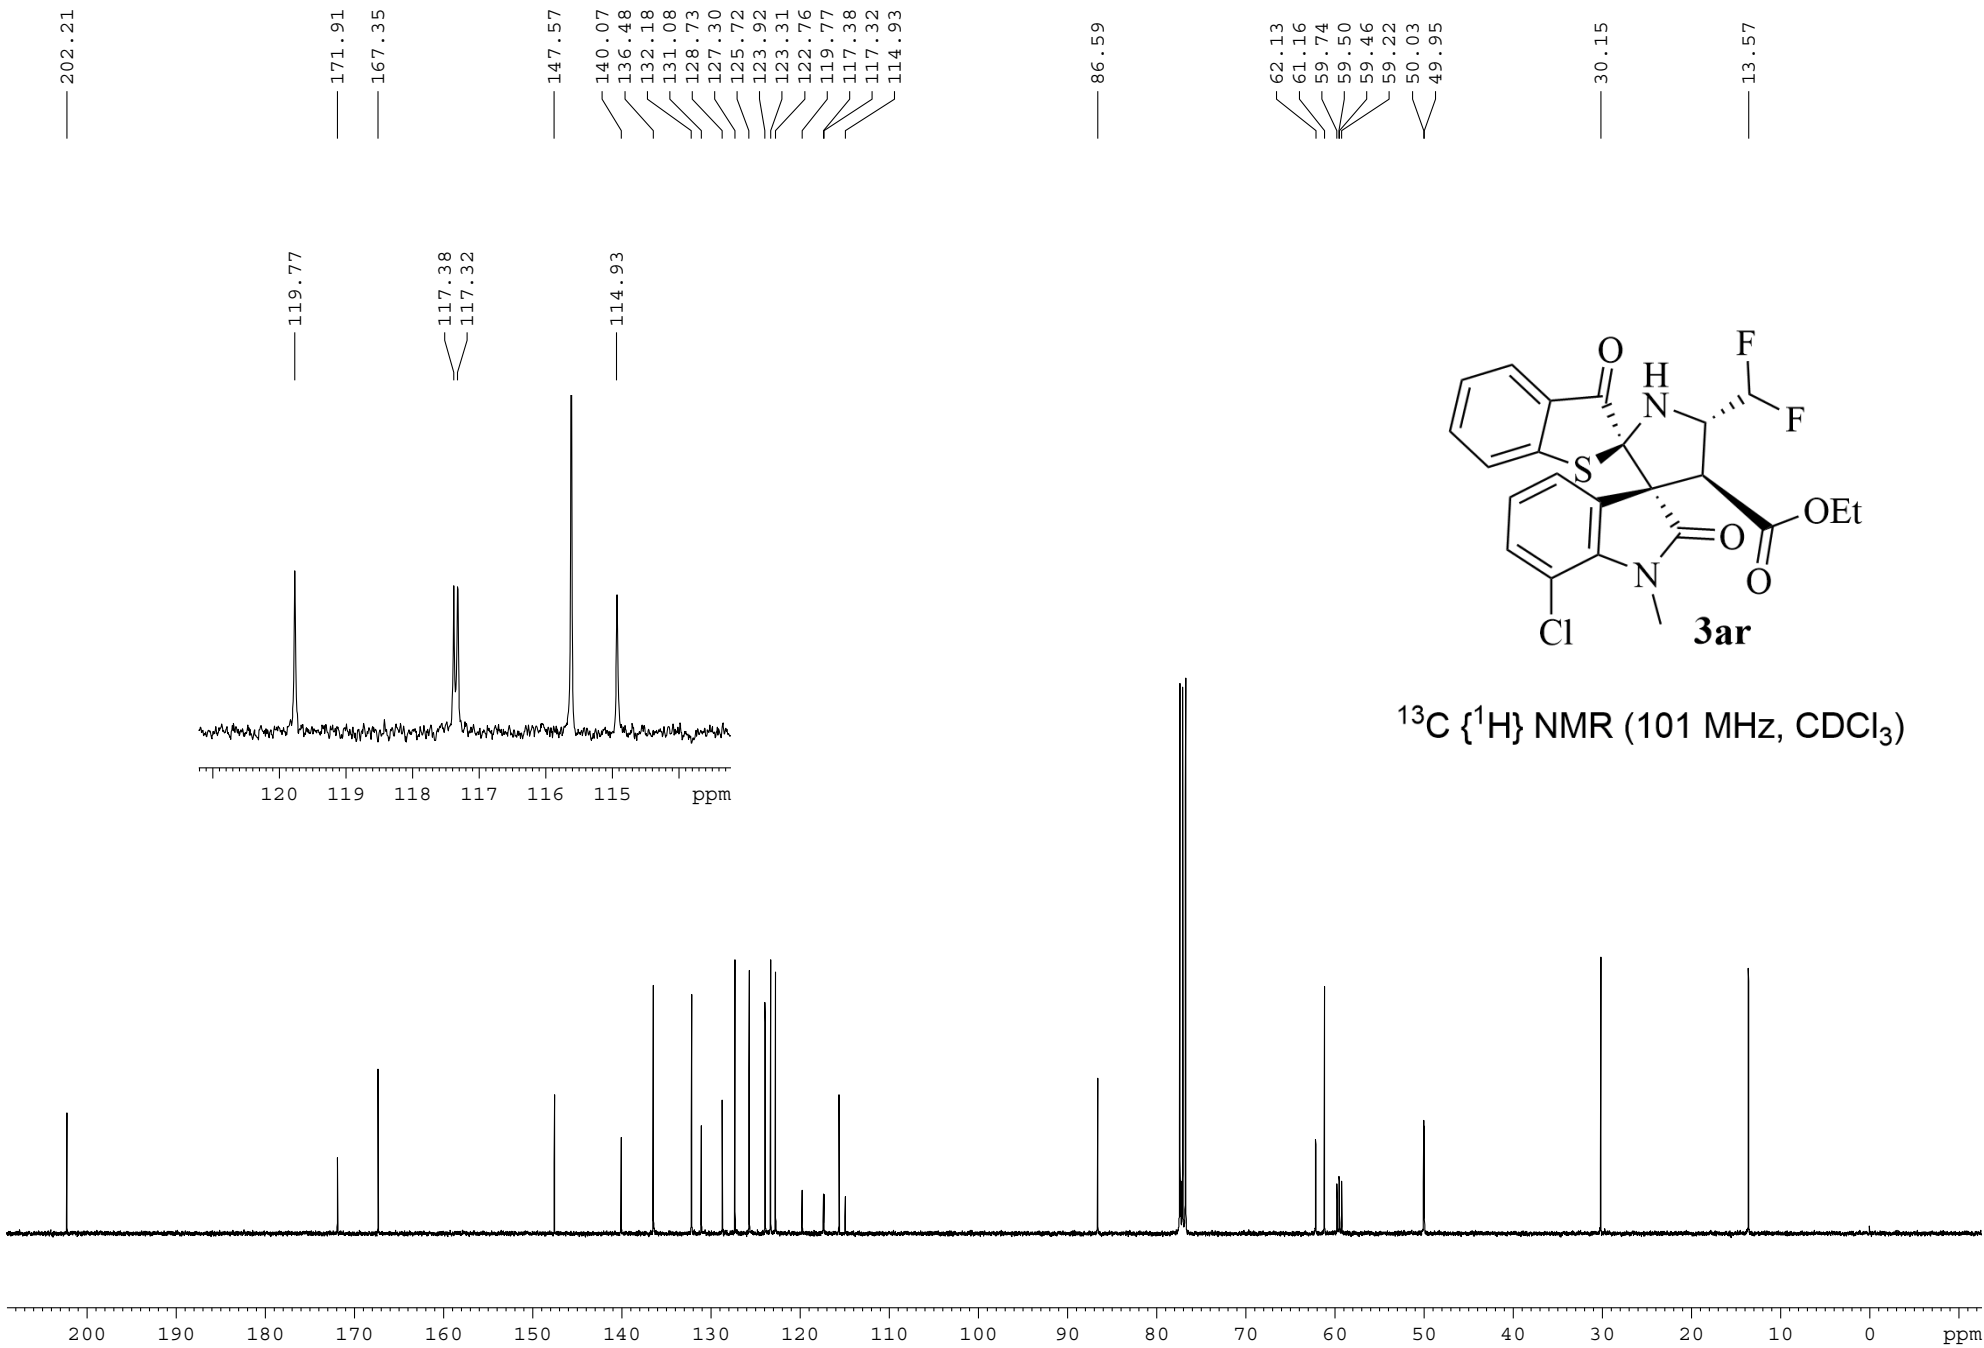

— -118.823

— -119.613

— -122.556

— -123.346

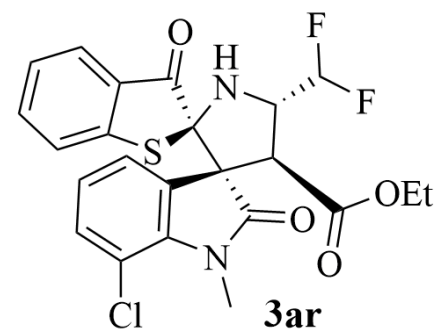

<sup>19</sup>F NMR (376 MHz, CDCl<sub>3</sub>)

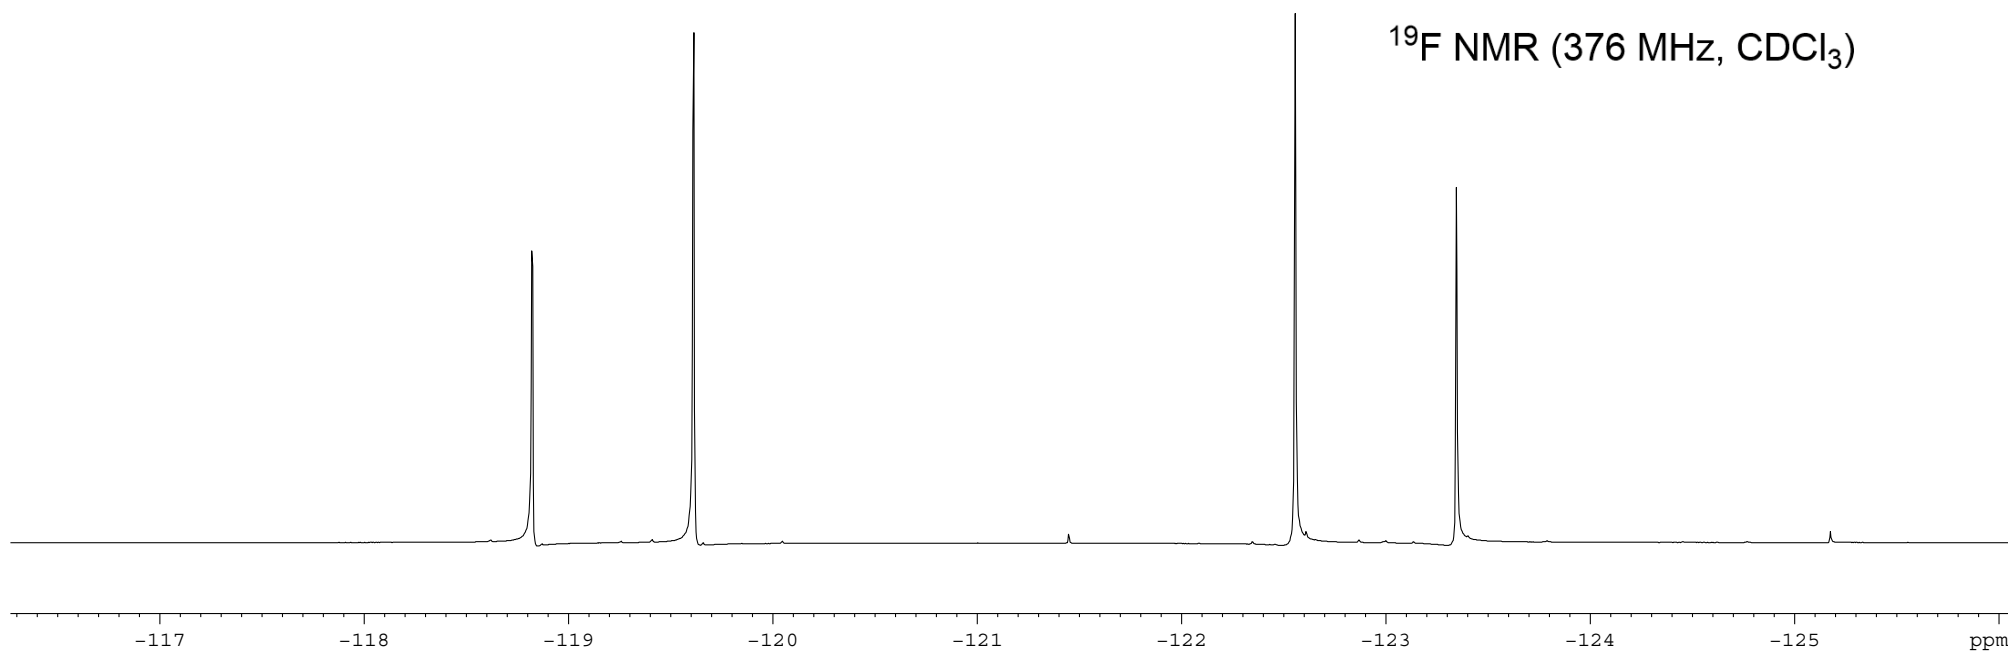

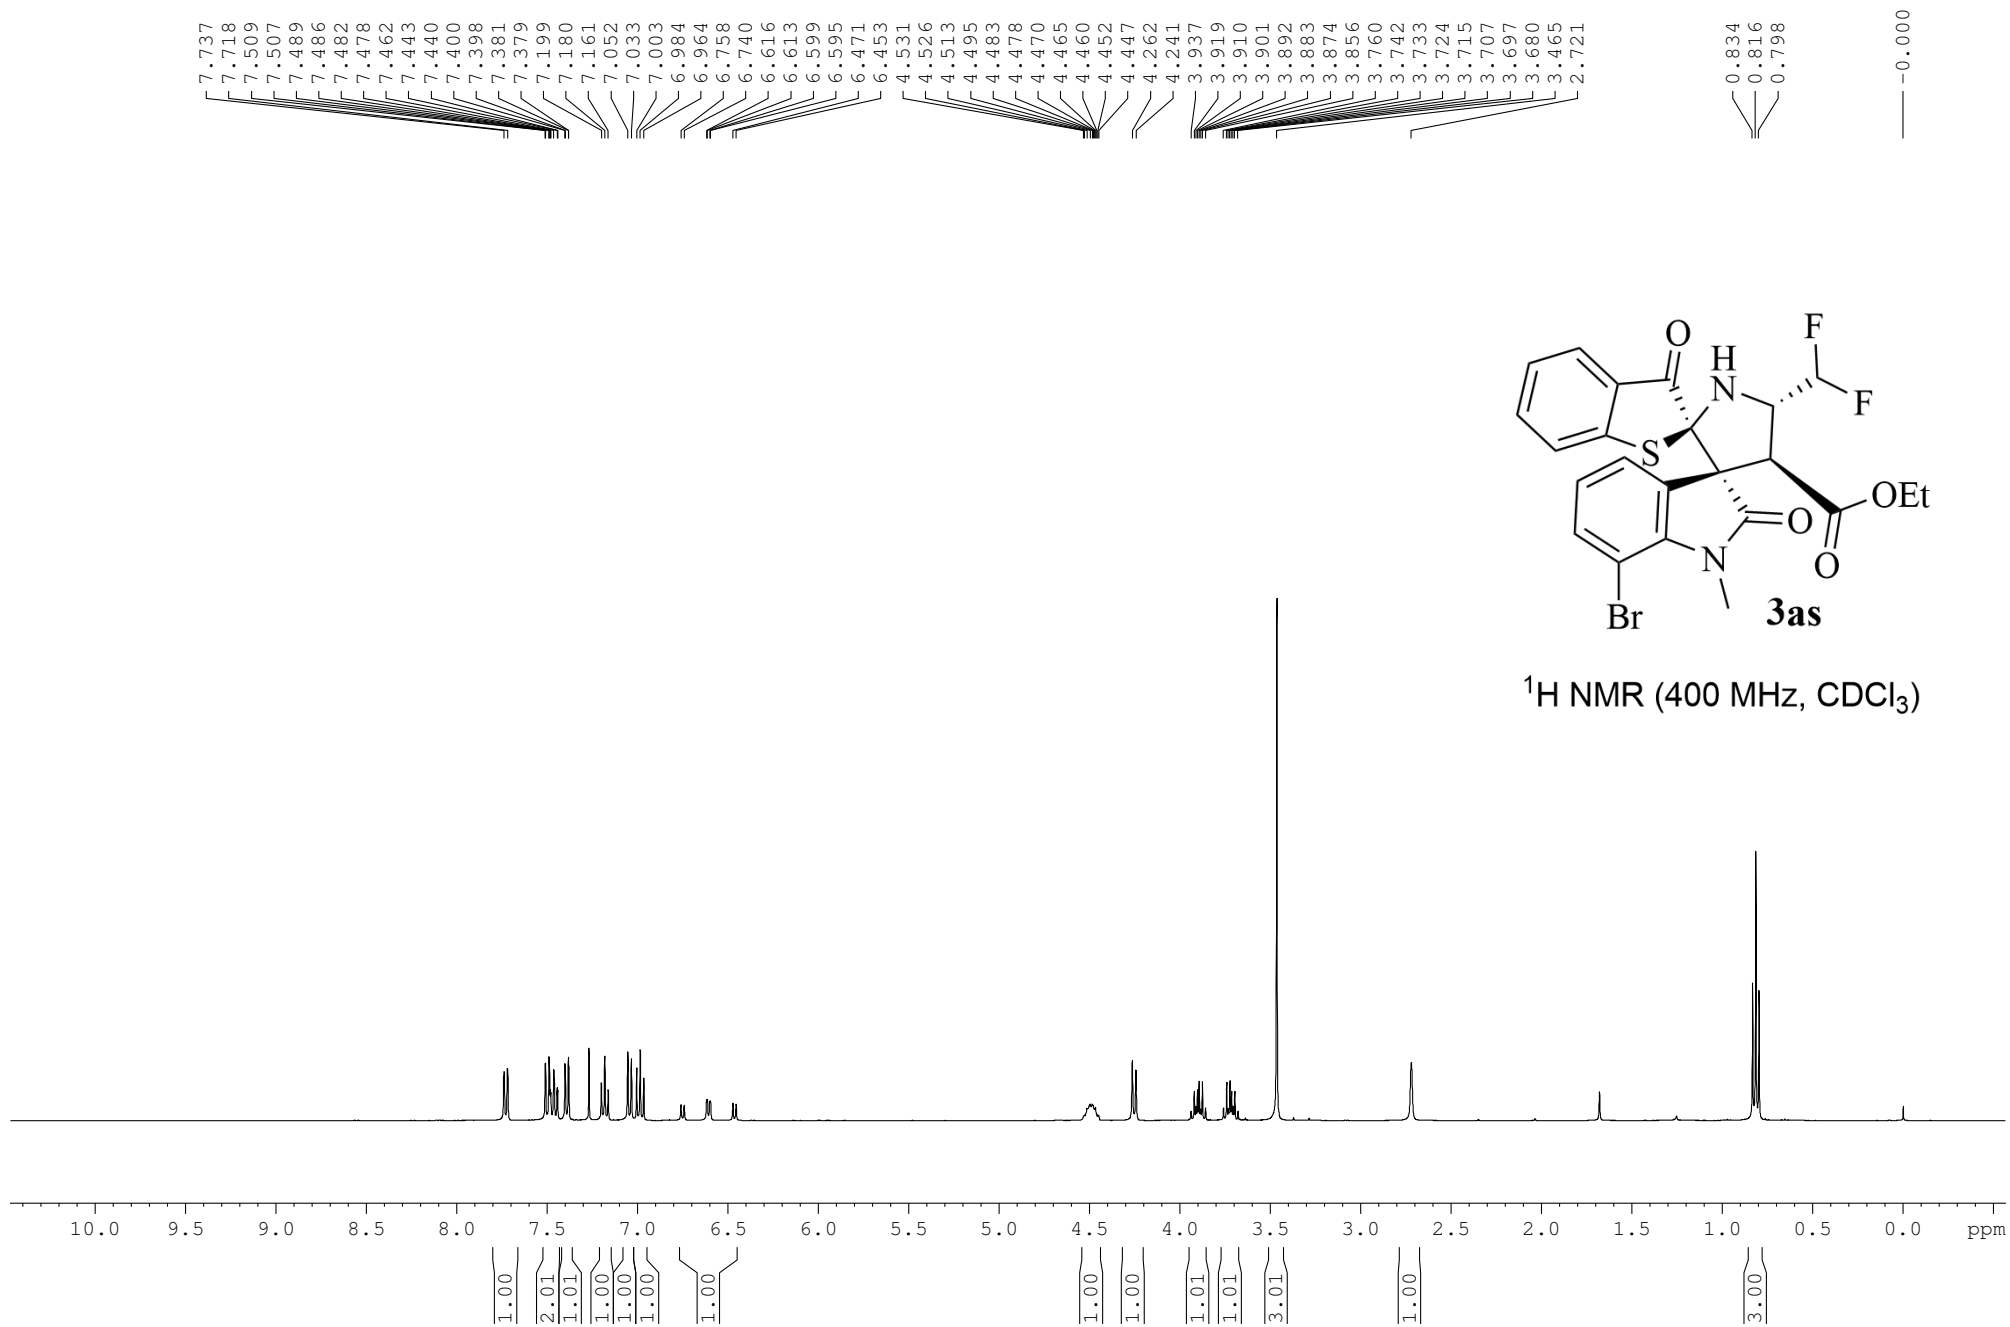

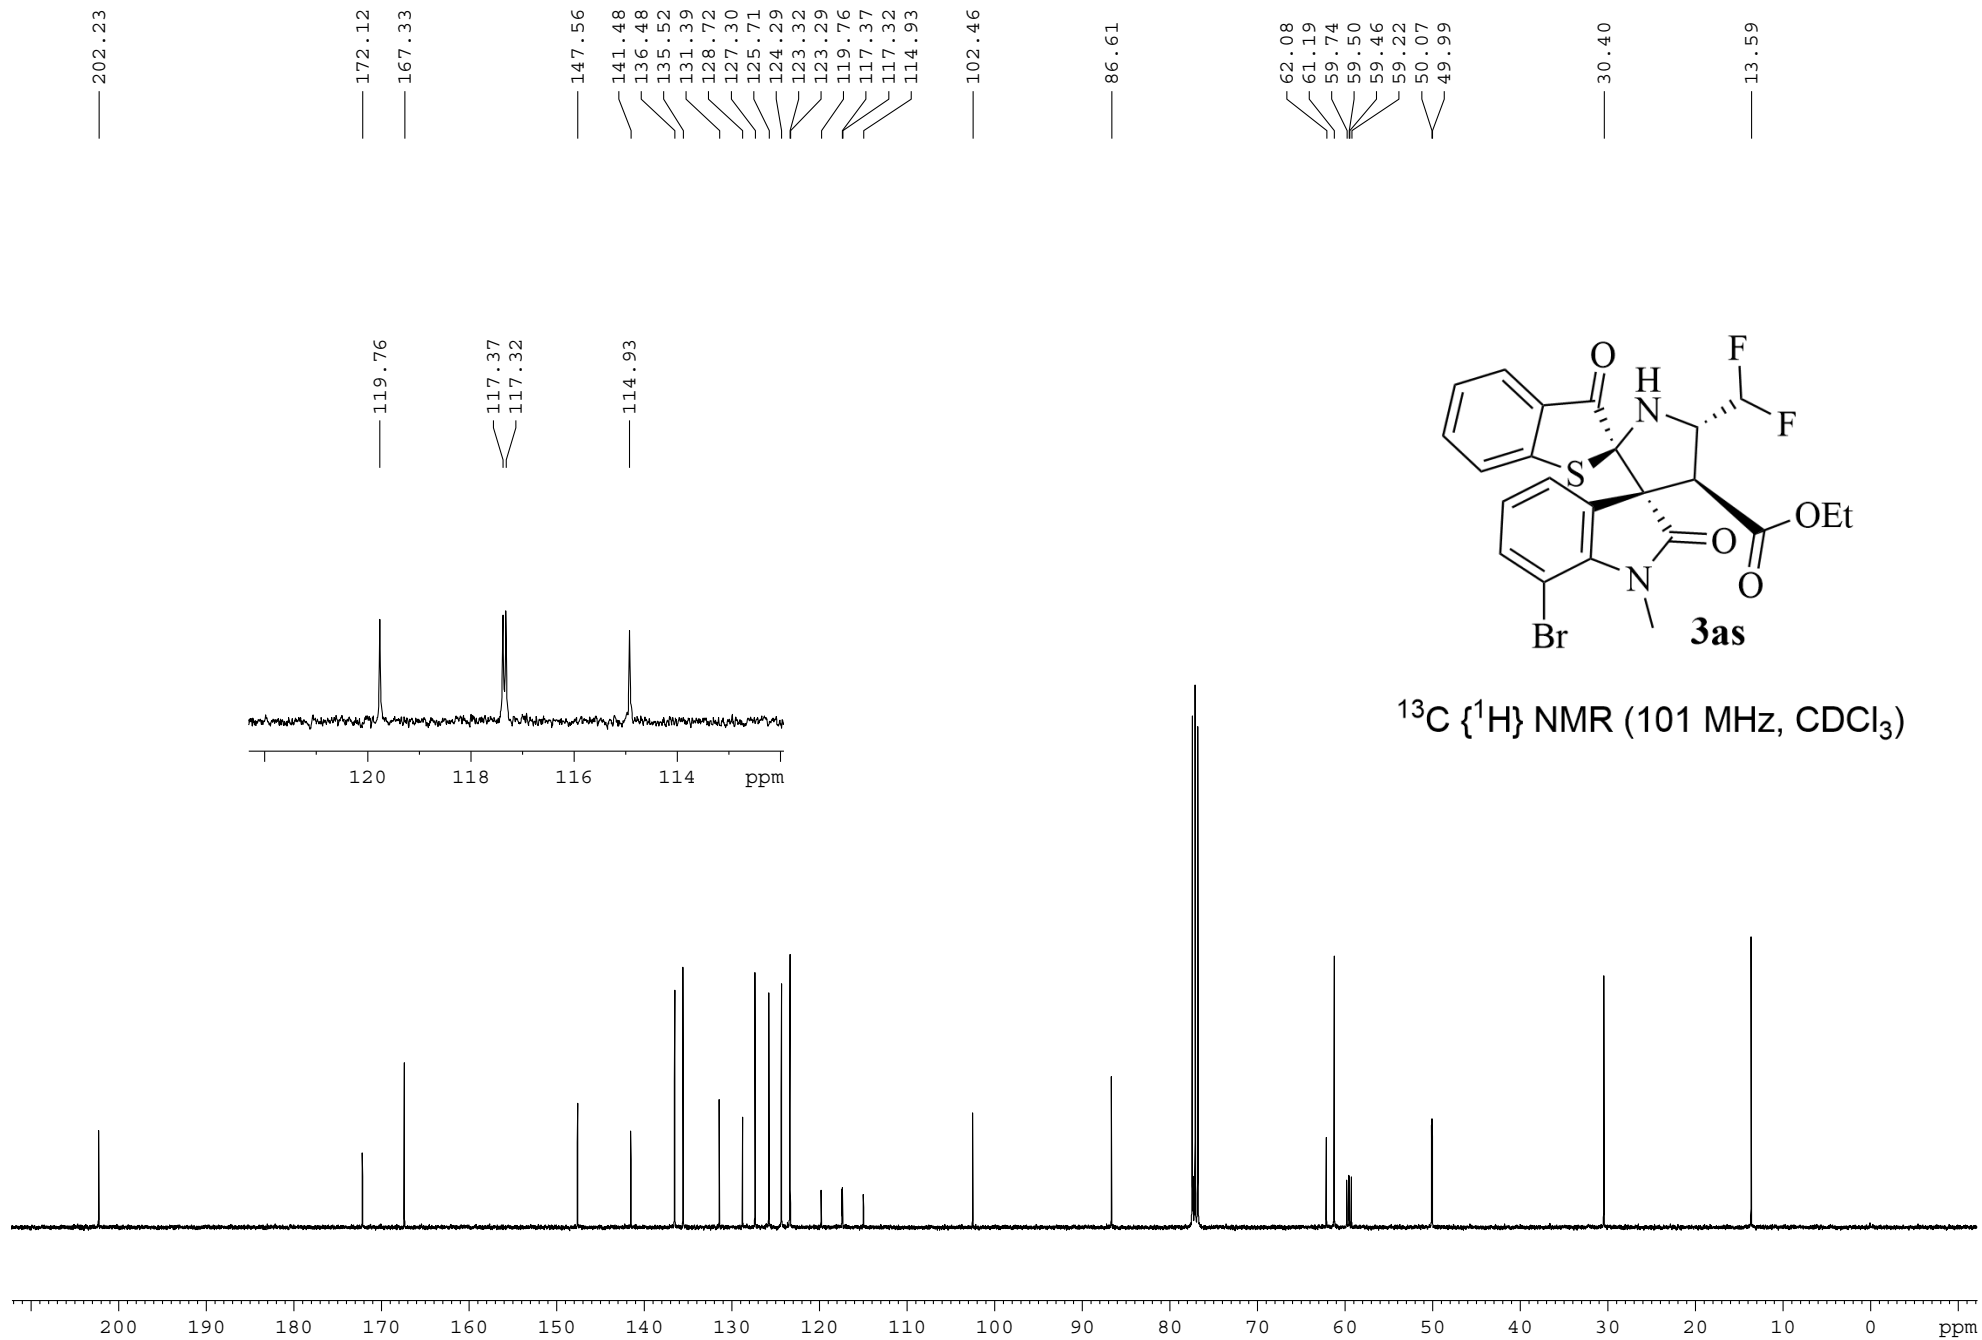

-118.807

-119.596

-122.549

-123.340

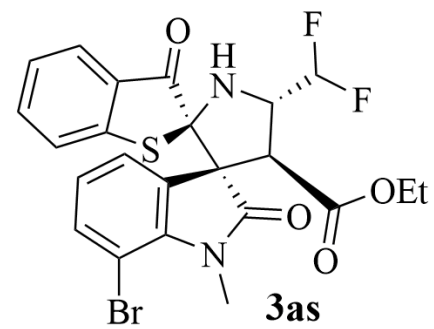

$^{19}\text{F}$  NMR (376 MHz,  $\text{CDCl}_3$ )

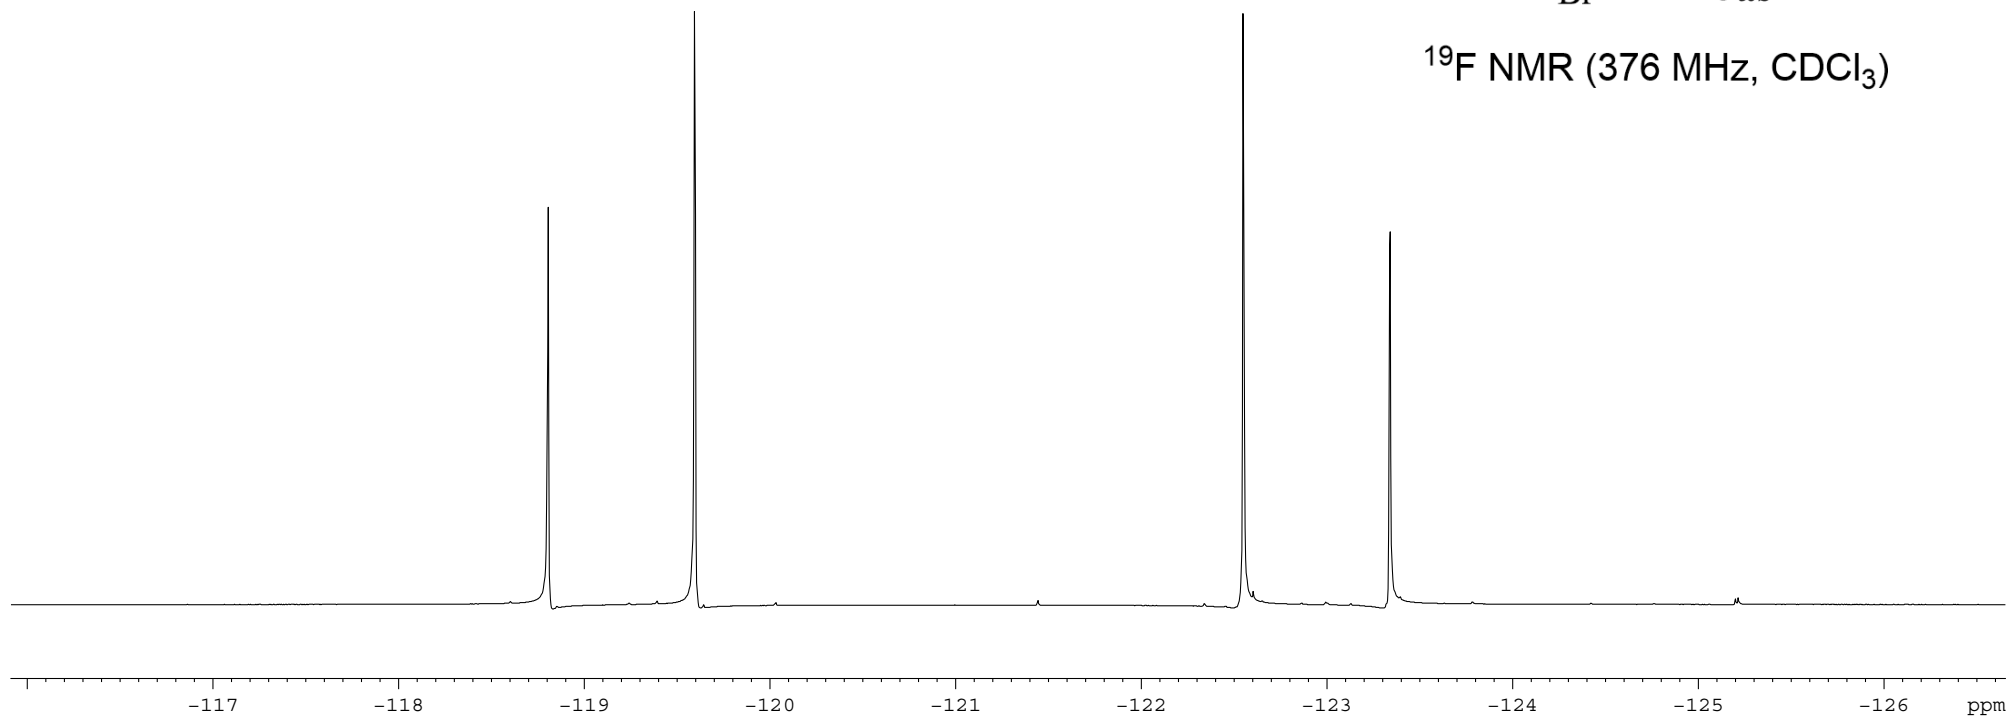

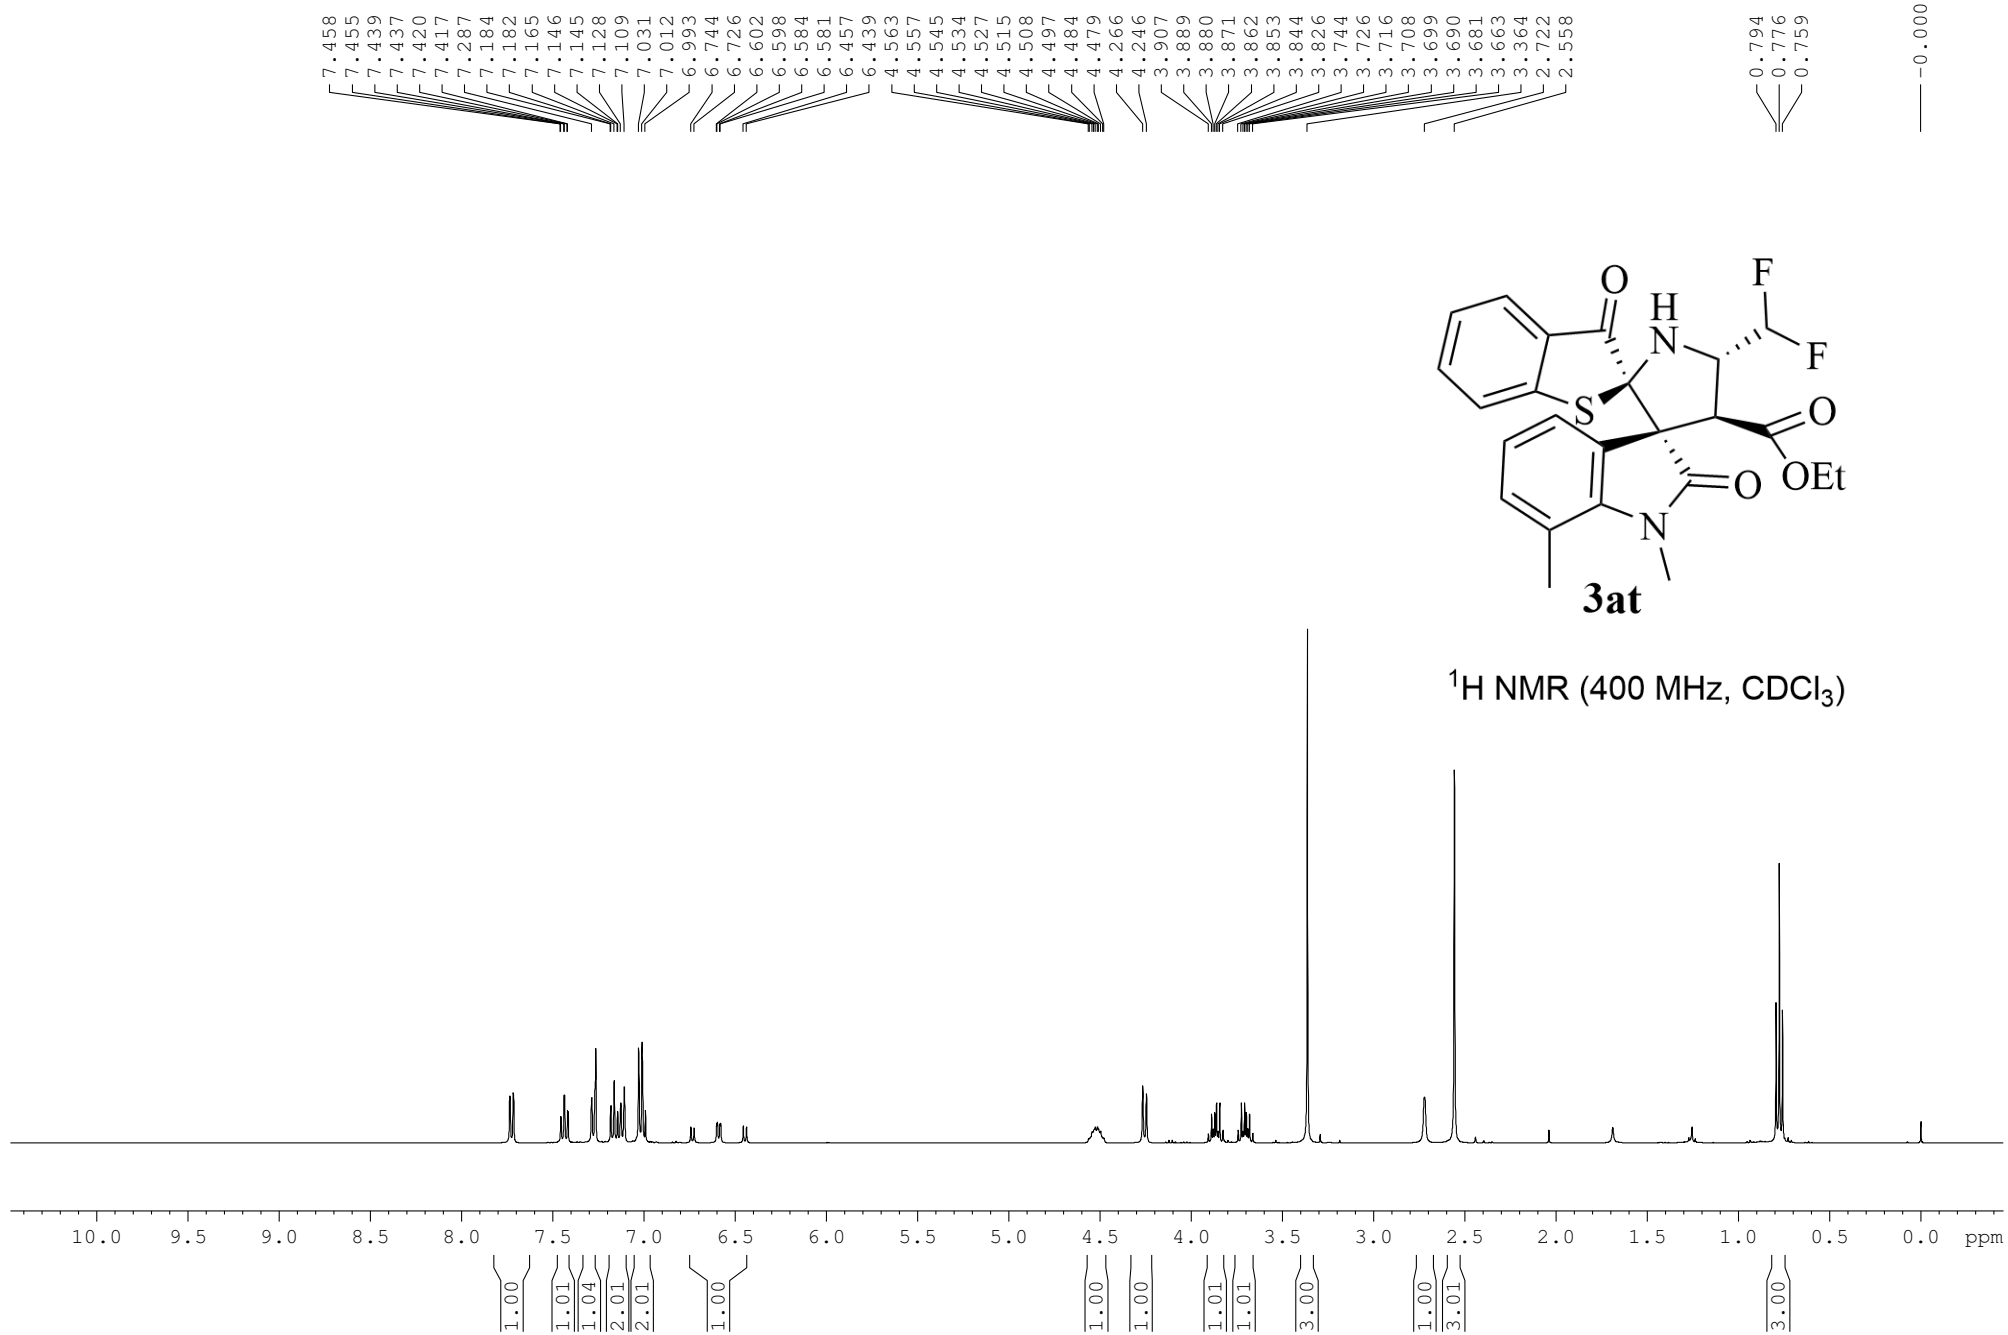

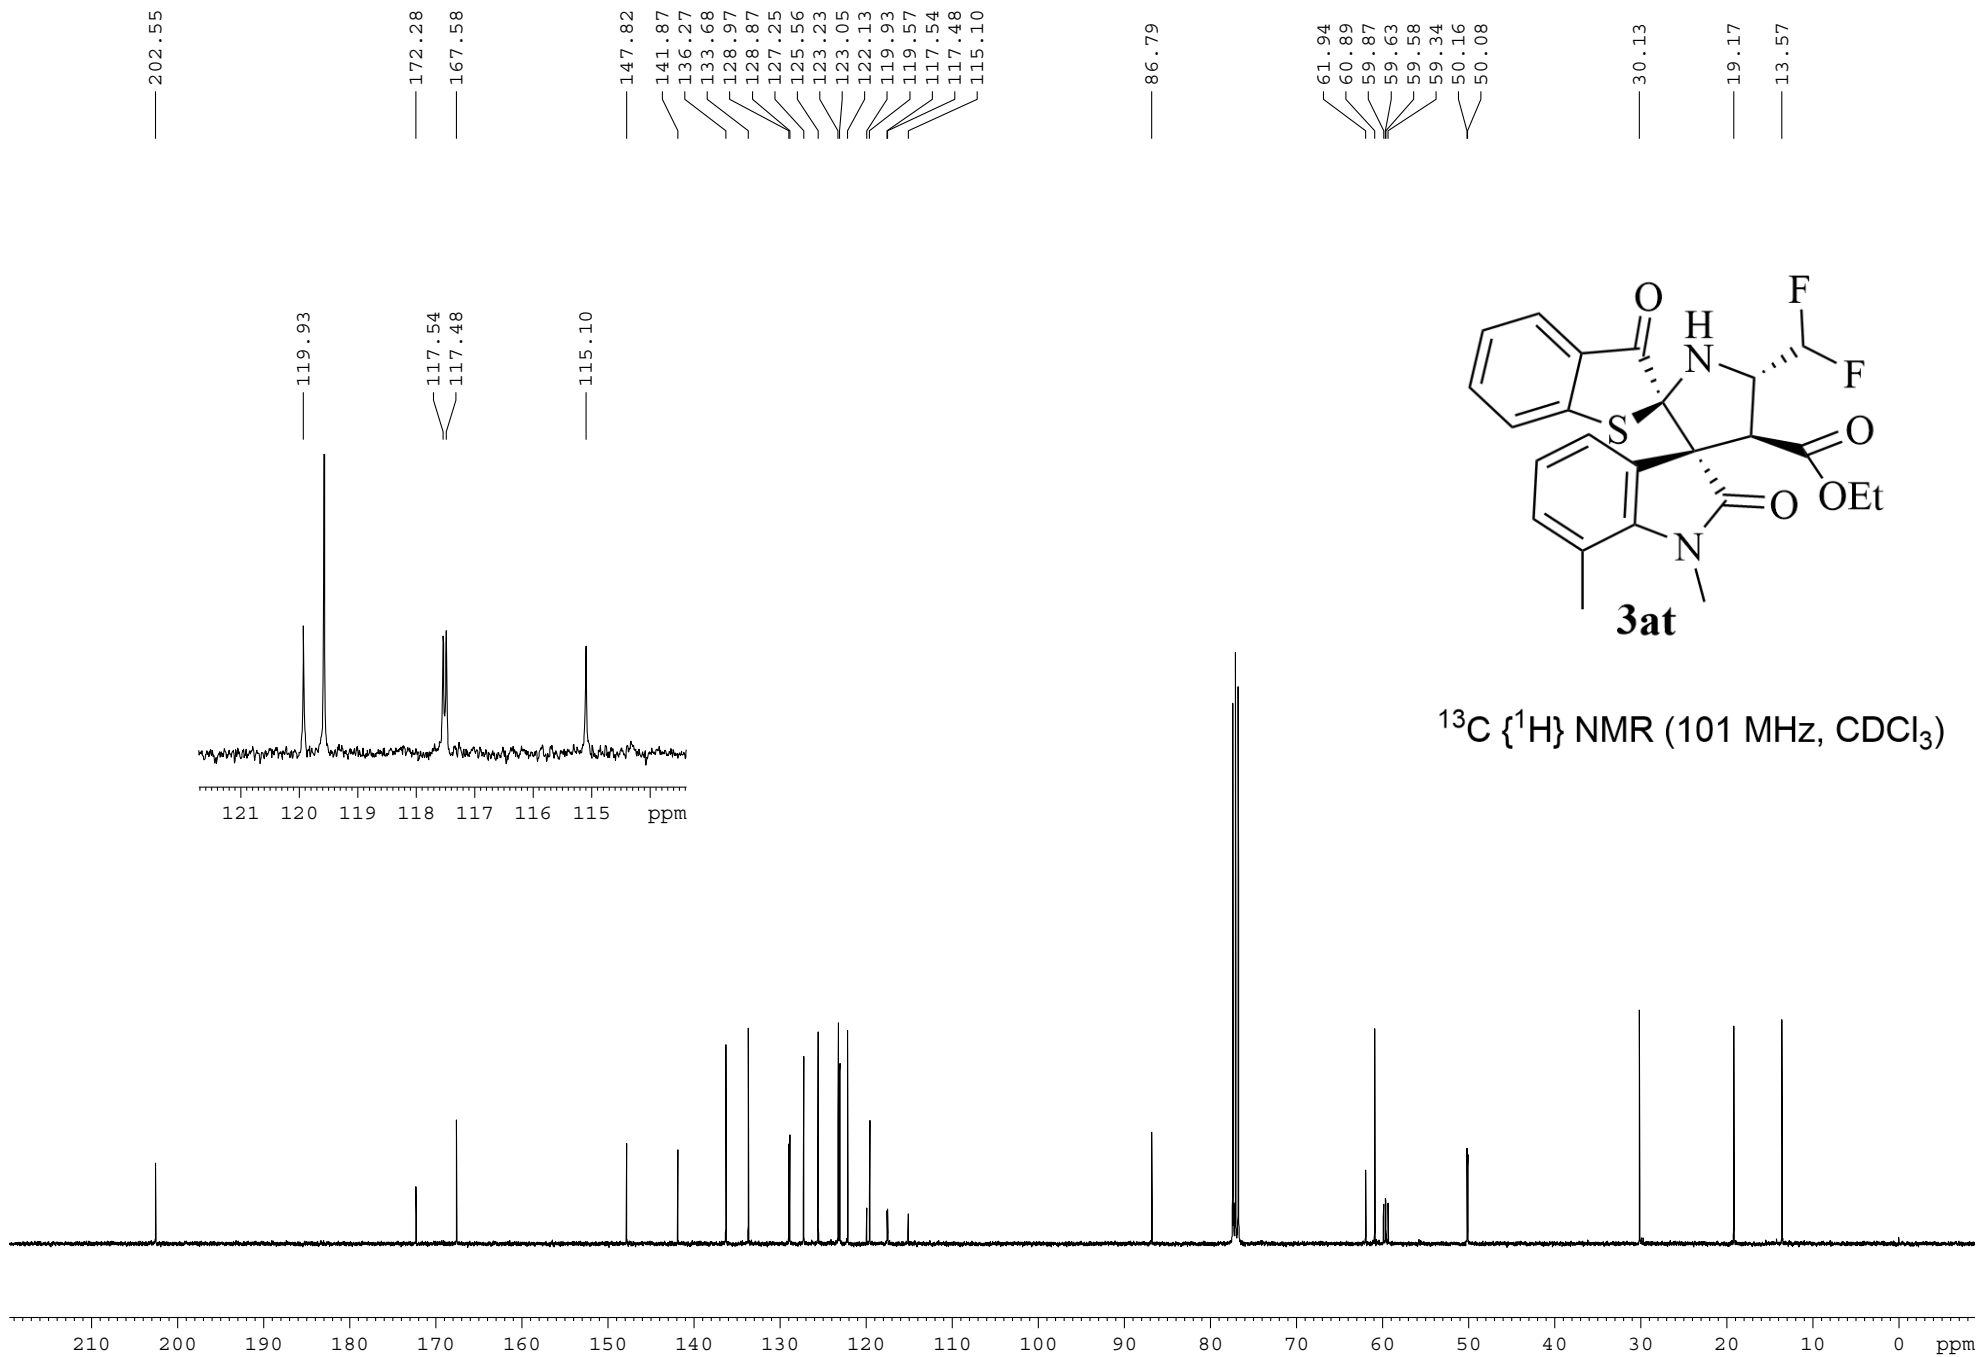

— -118.846

— -119.633

— -122.661

— -123.449

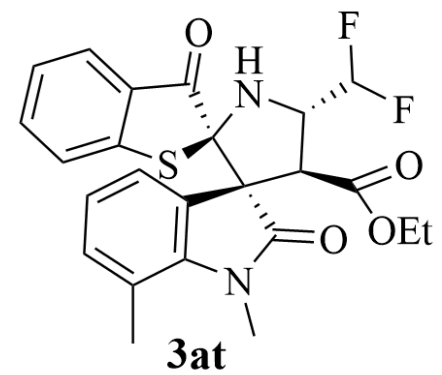

$^{19}\text{F}$  NMR (376 MHz,  $\text{CDCl}_3$ )

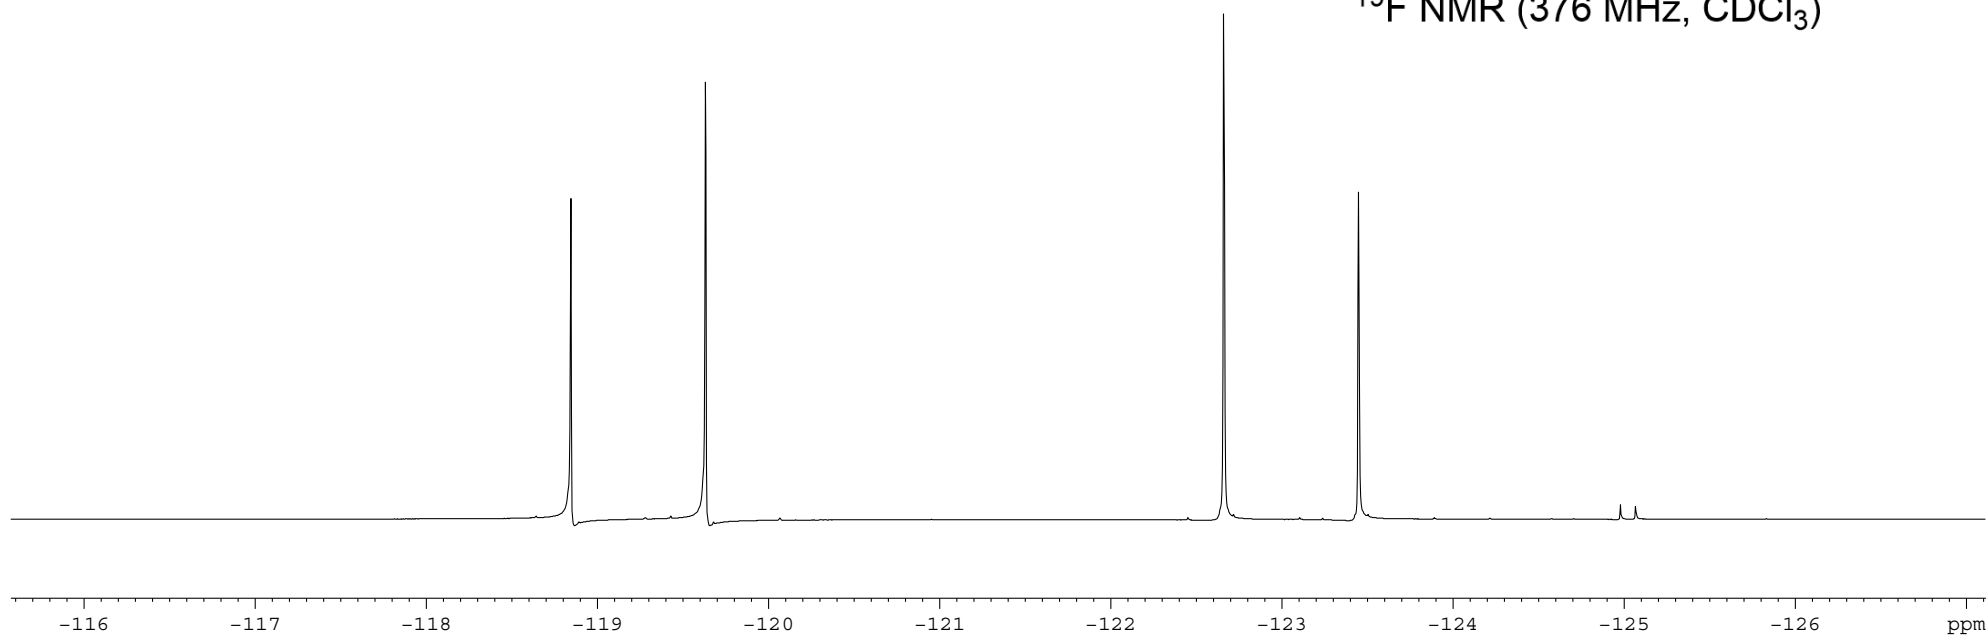



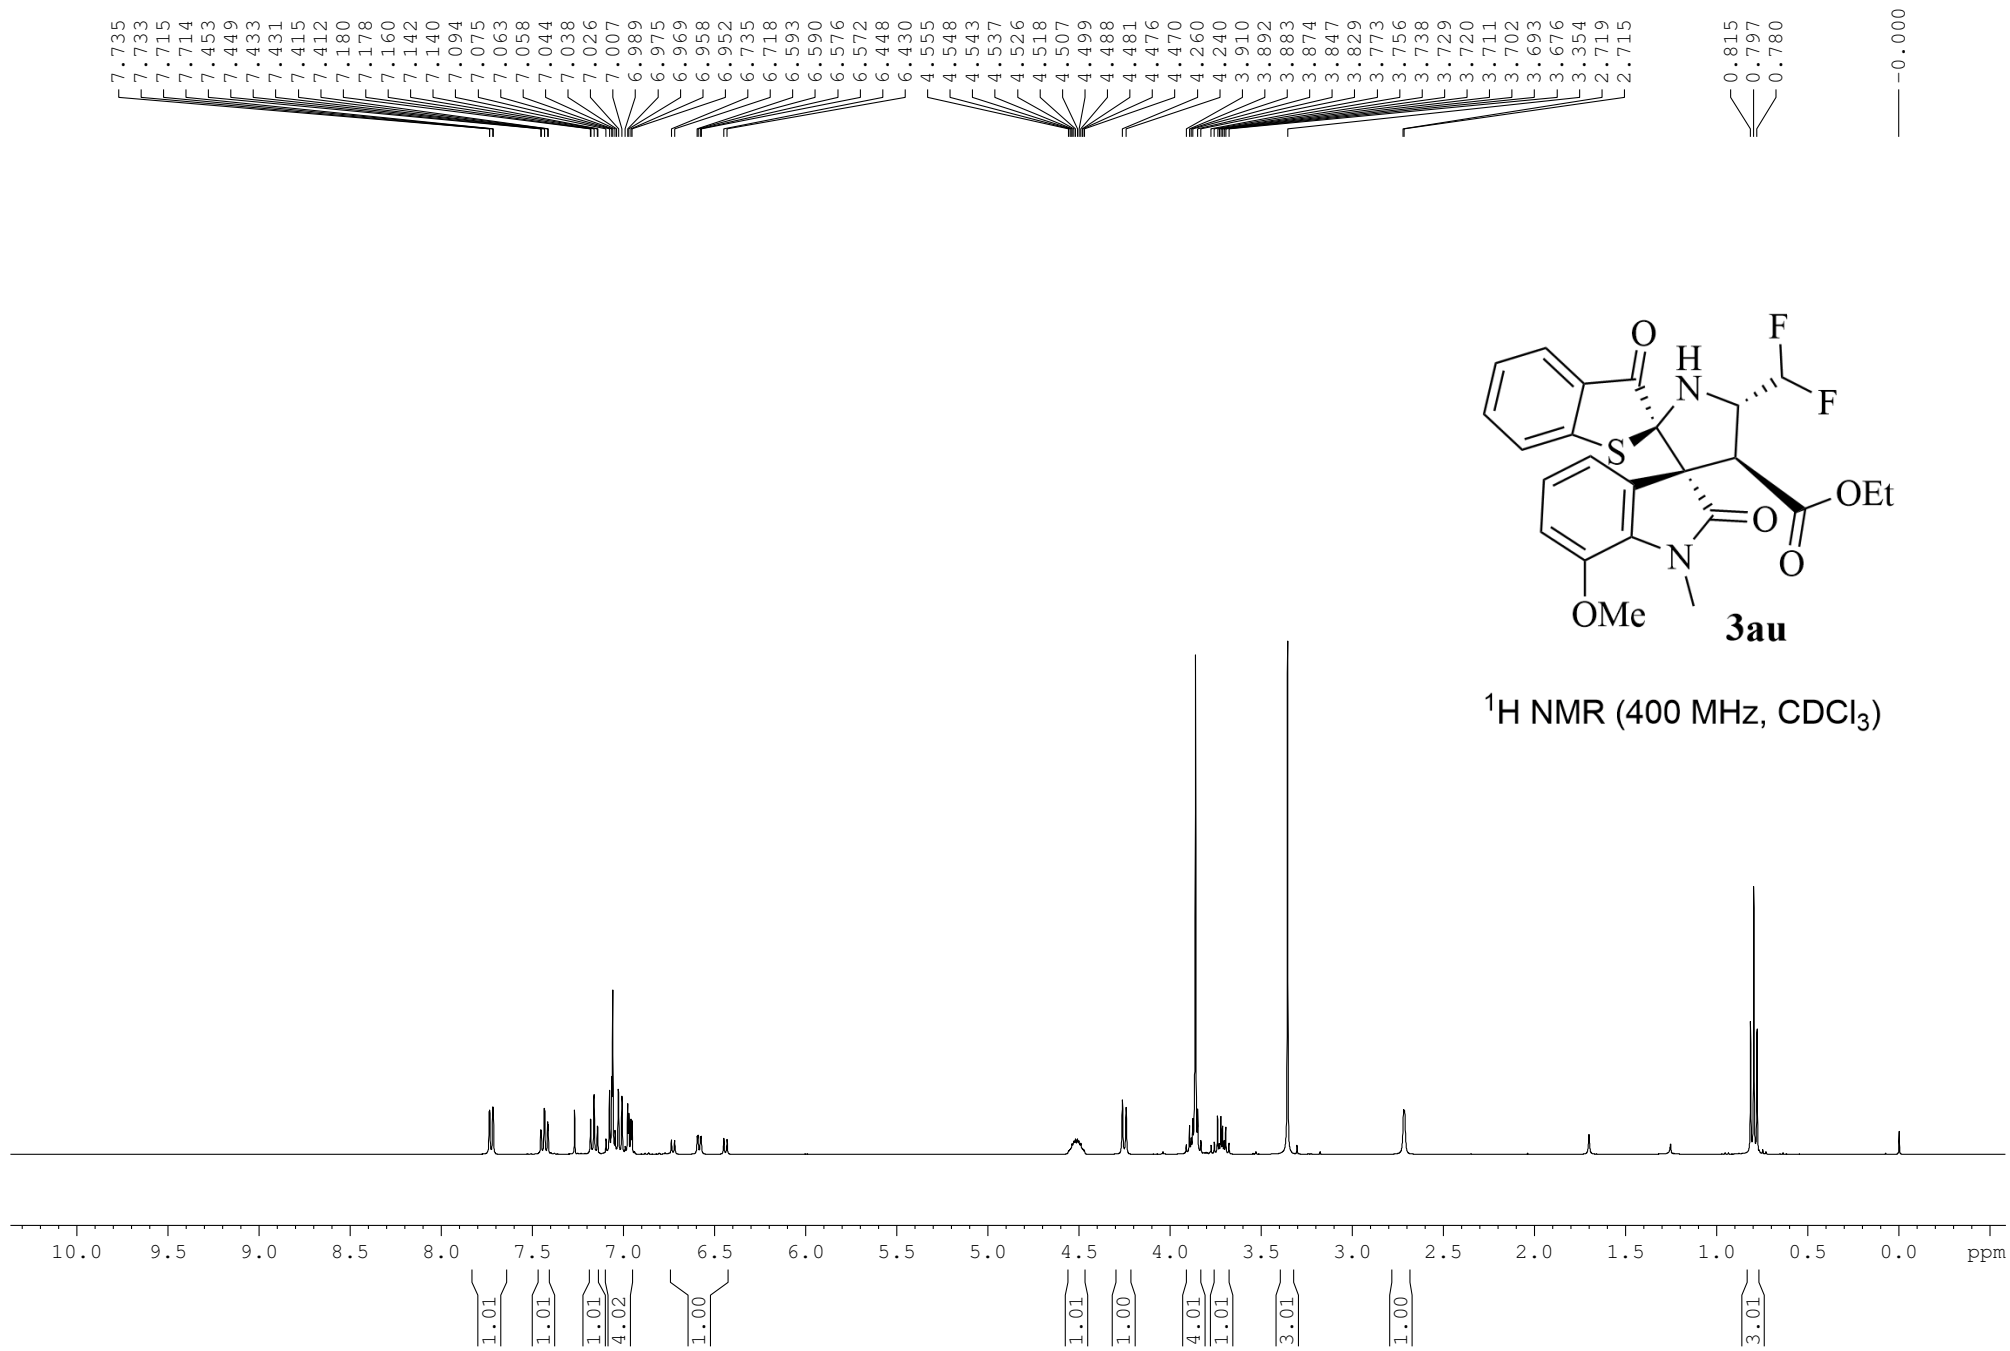

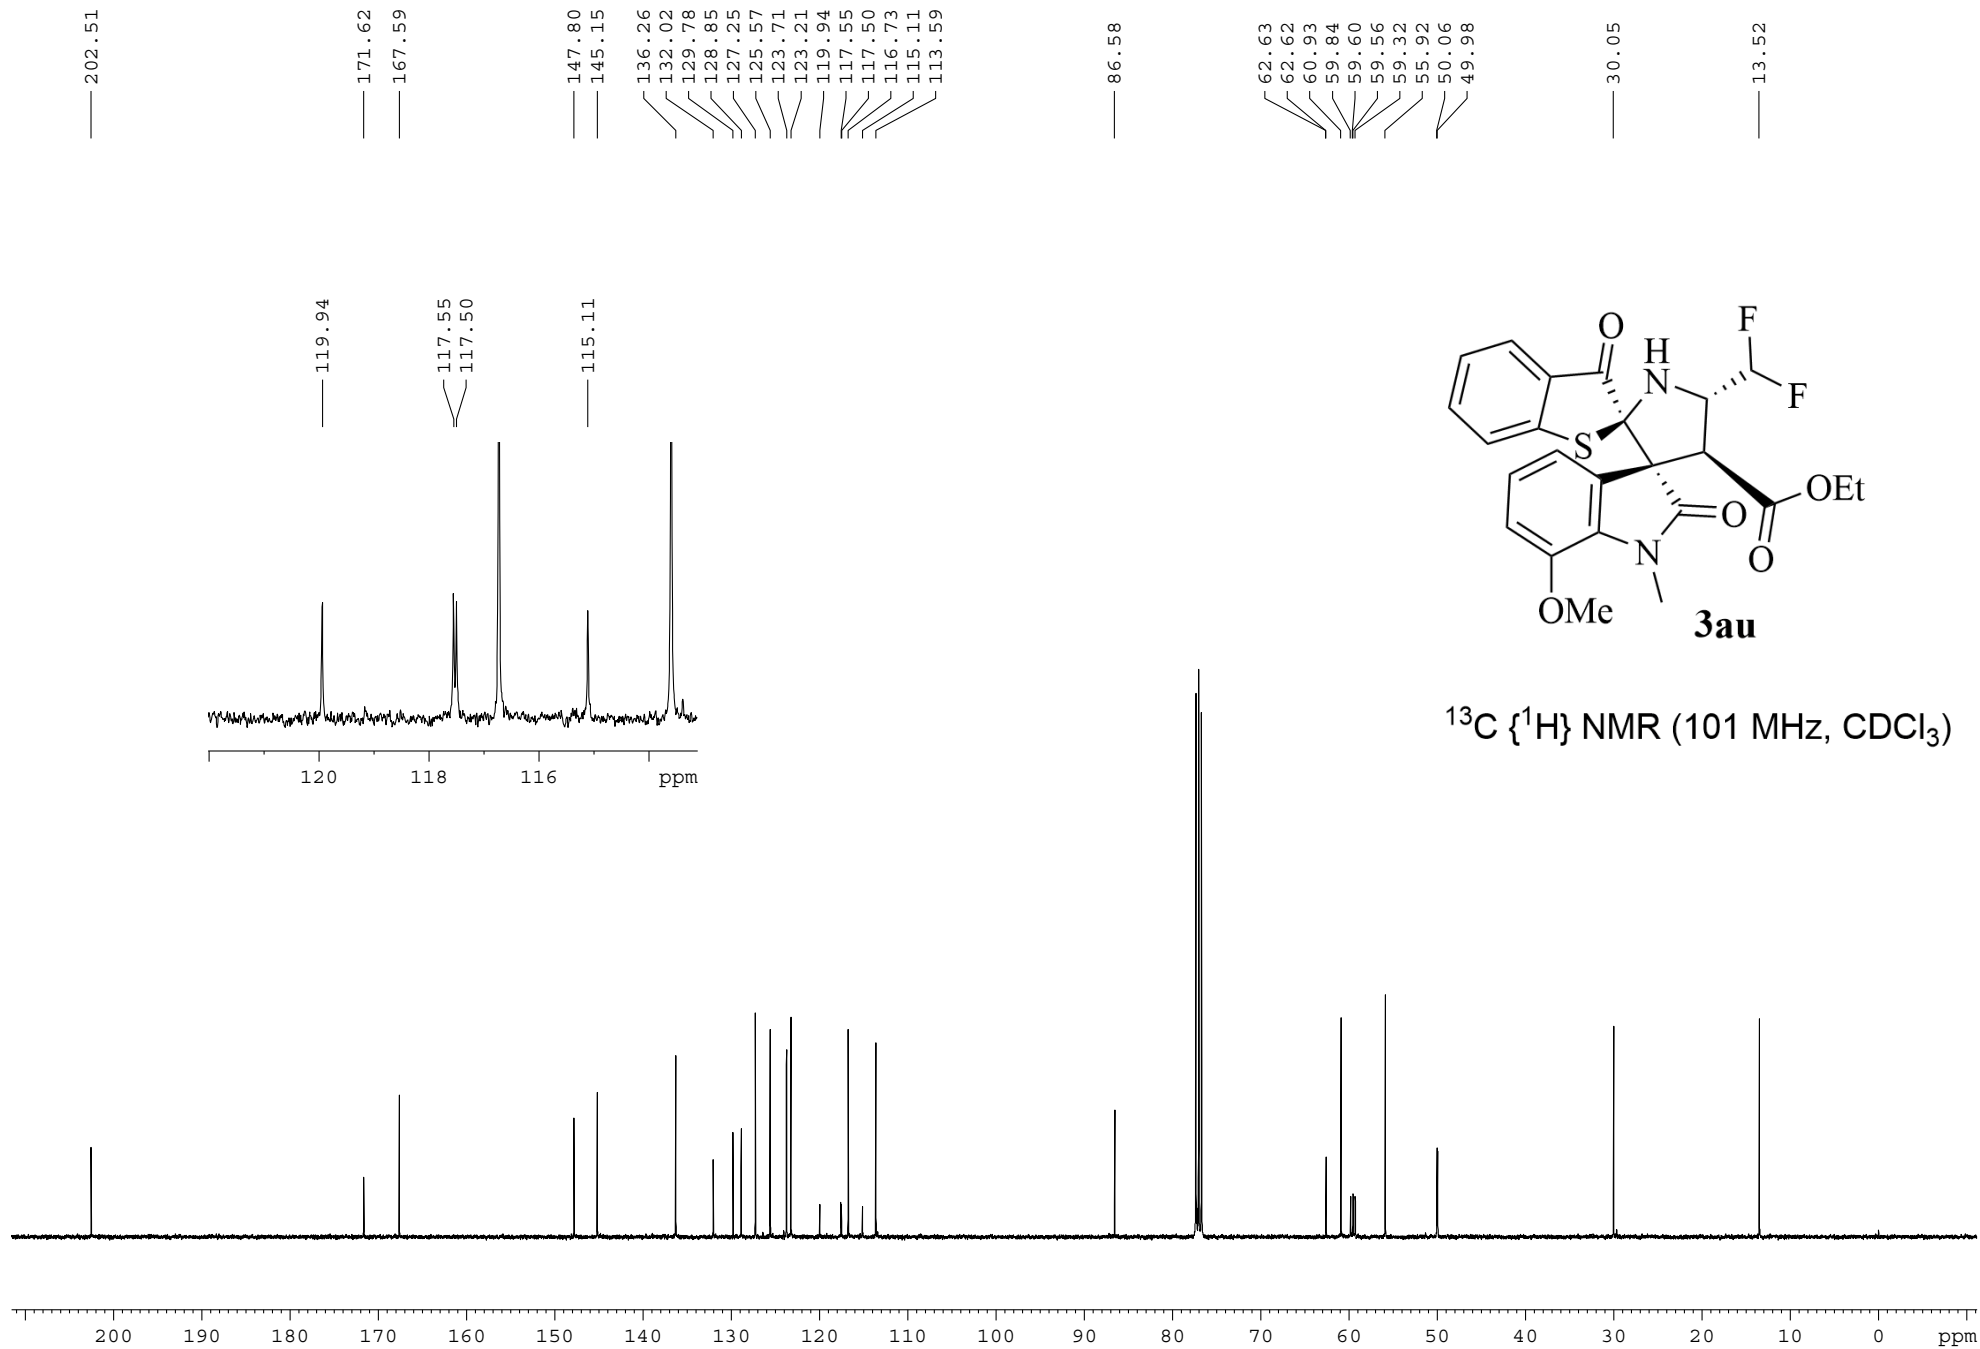

-118.871

-119.657

-122.684

-123.471

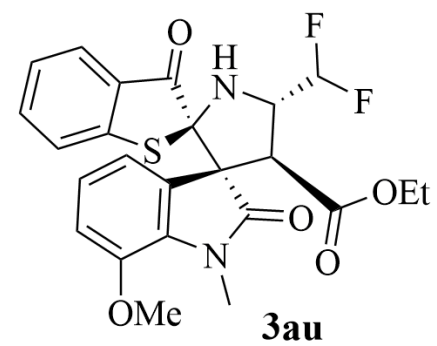

<sup>19</sup>F NMR (376 MHz, CDCl<sub>3</sub>)

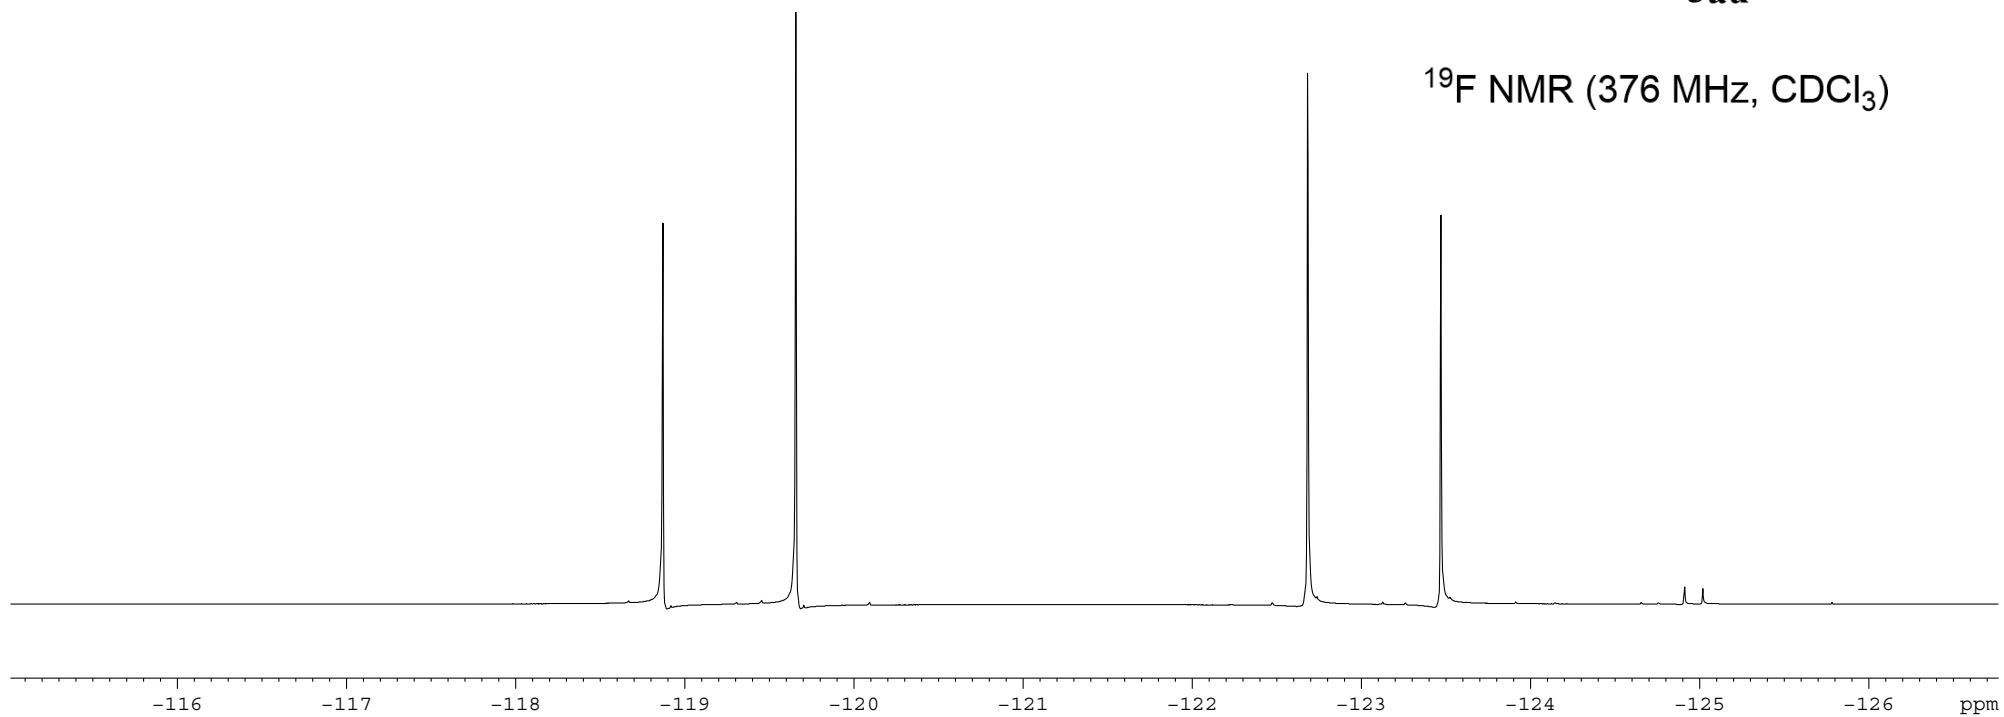

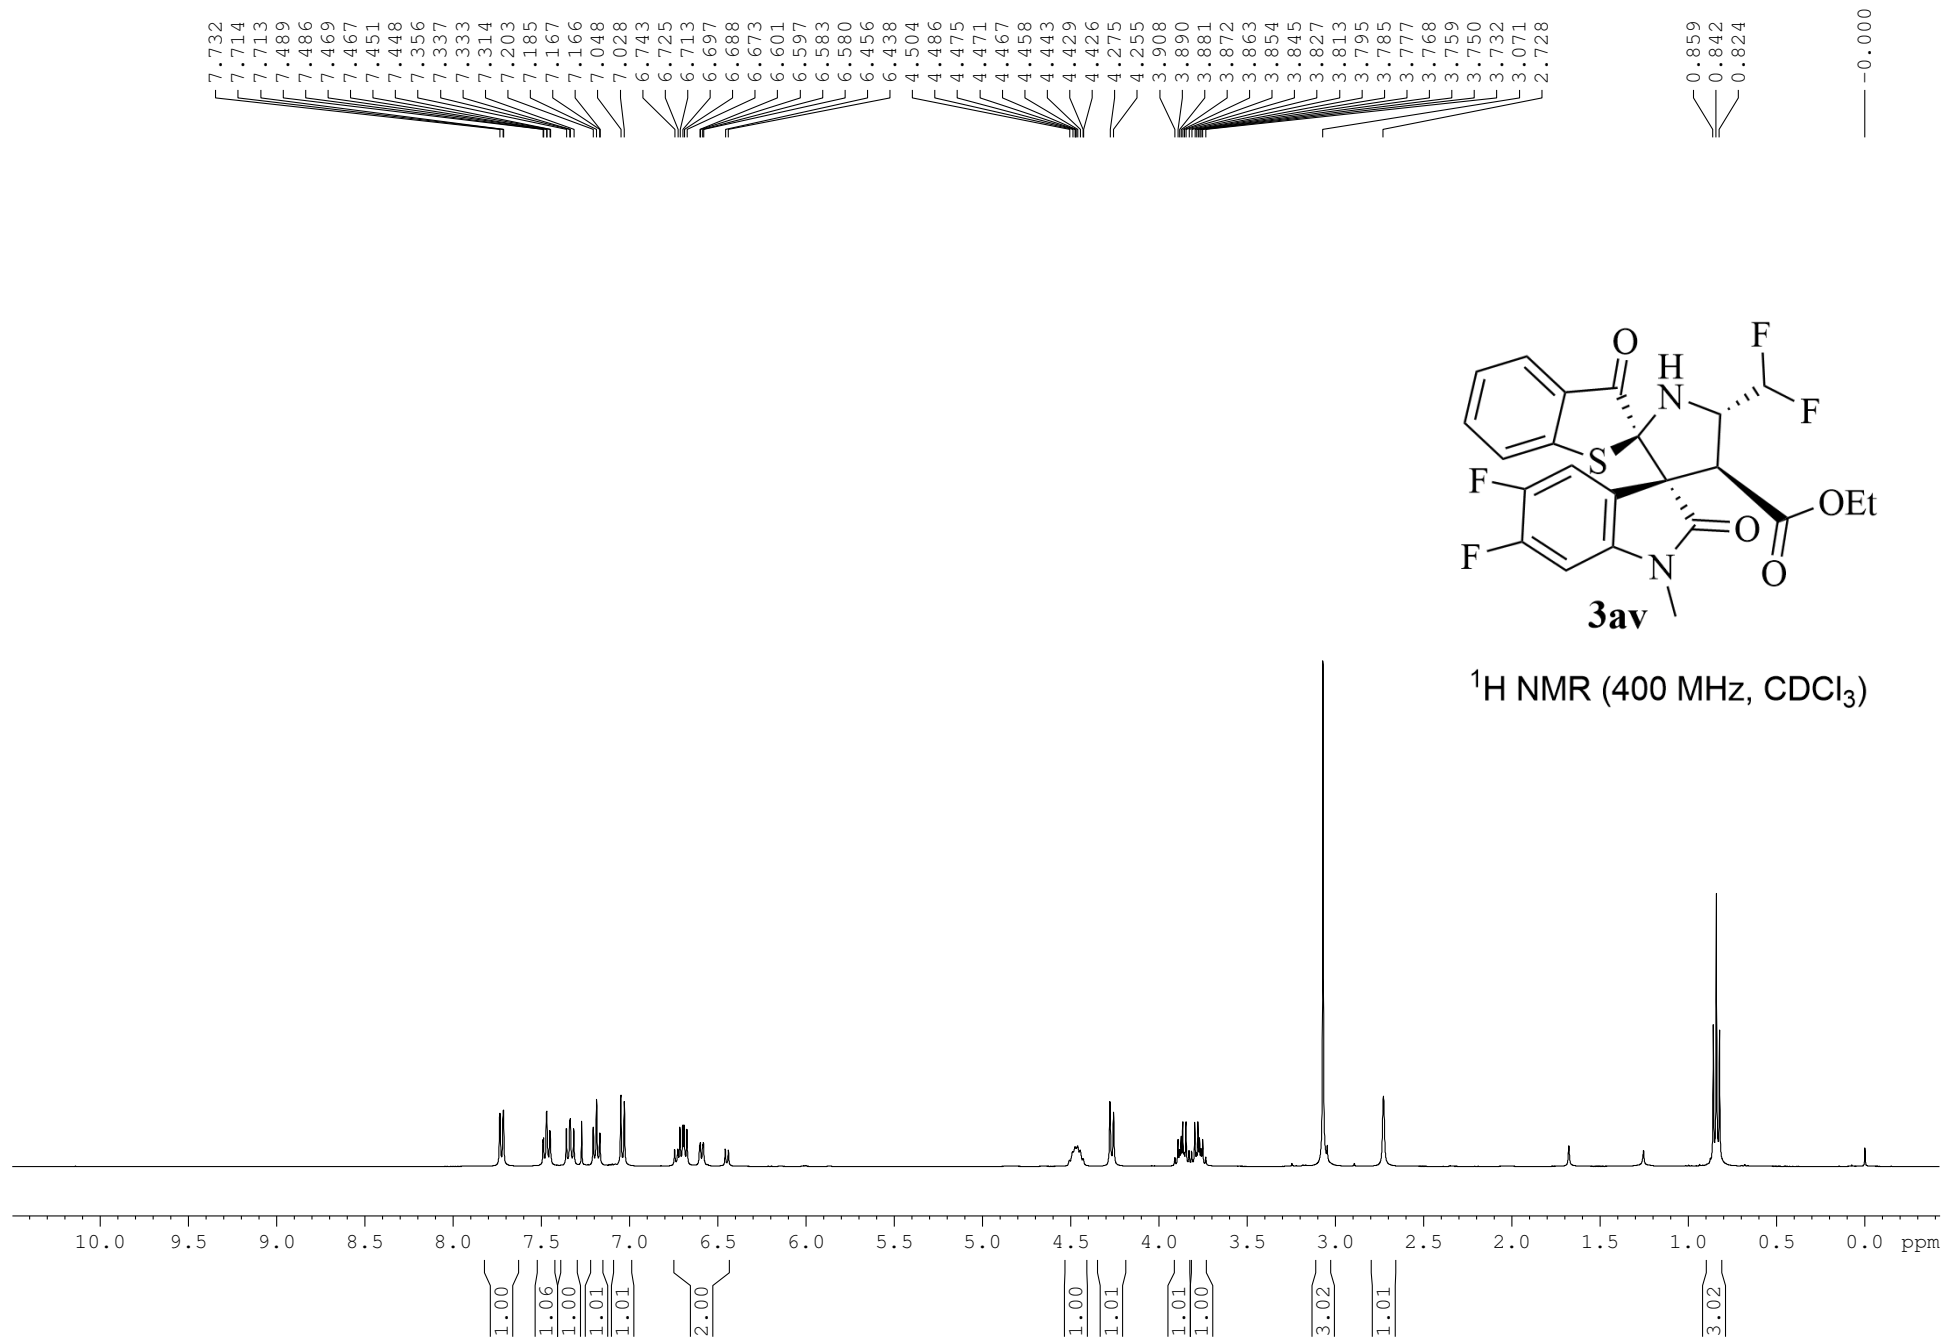

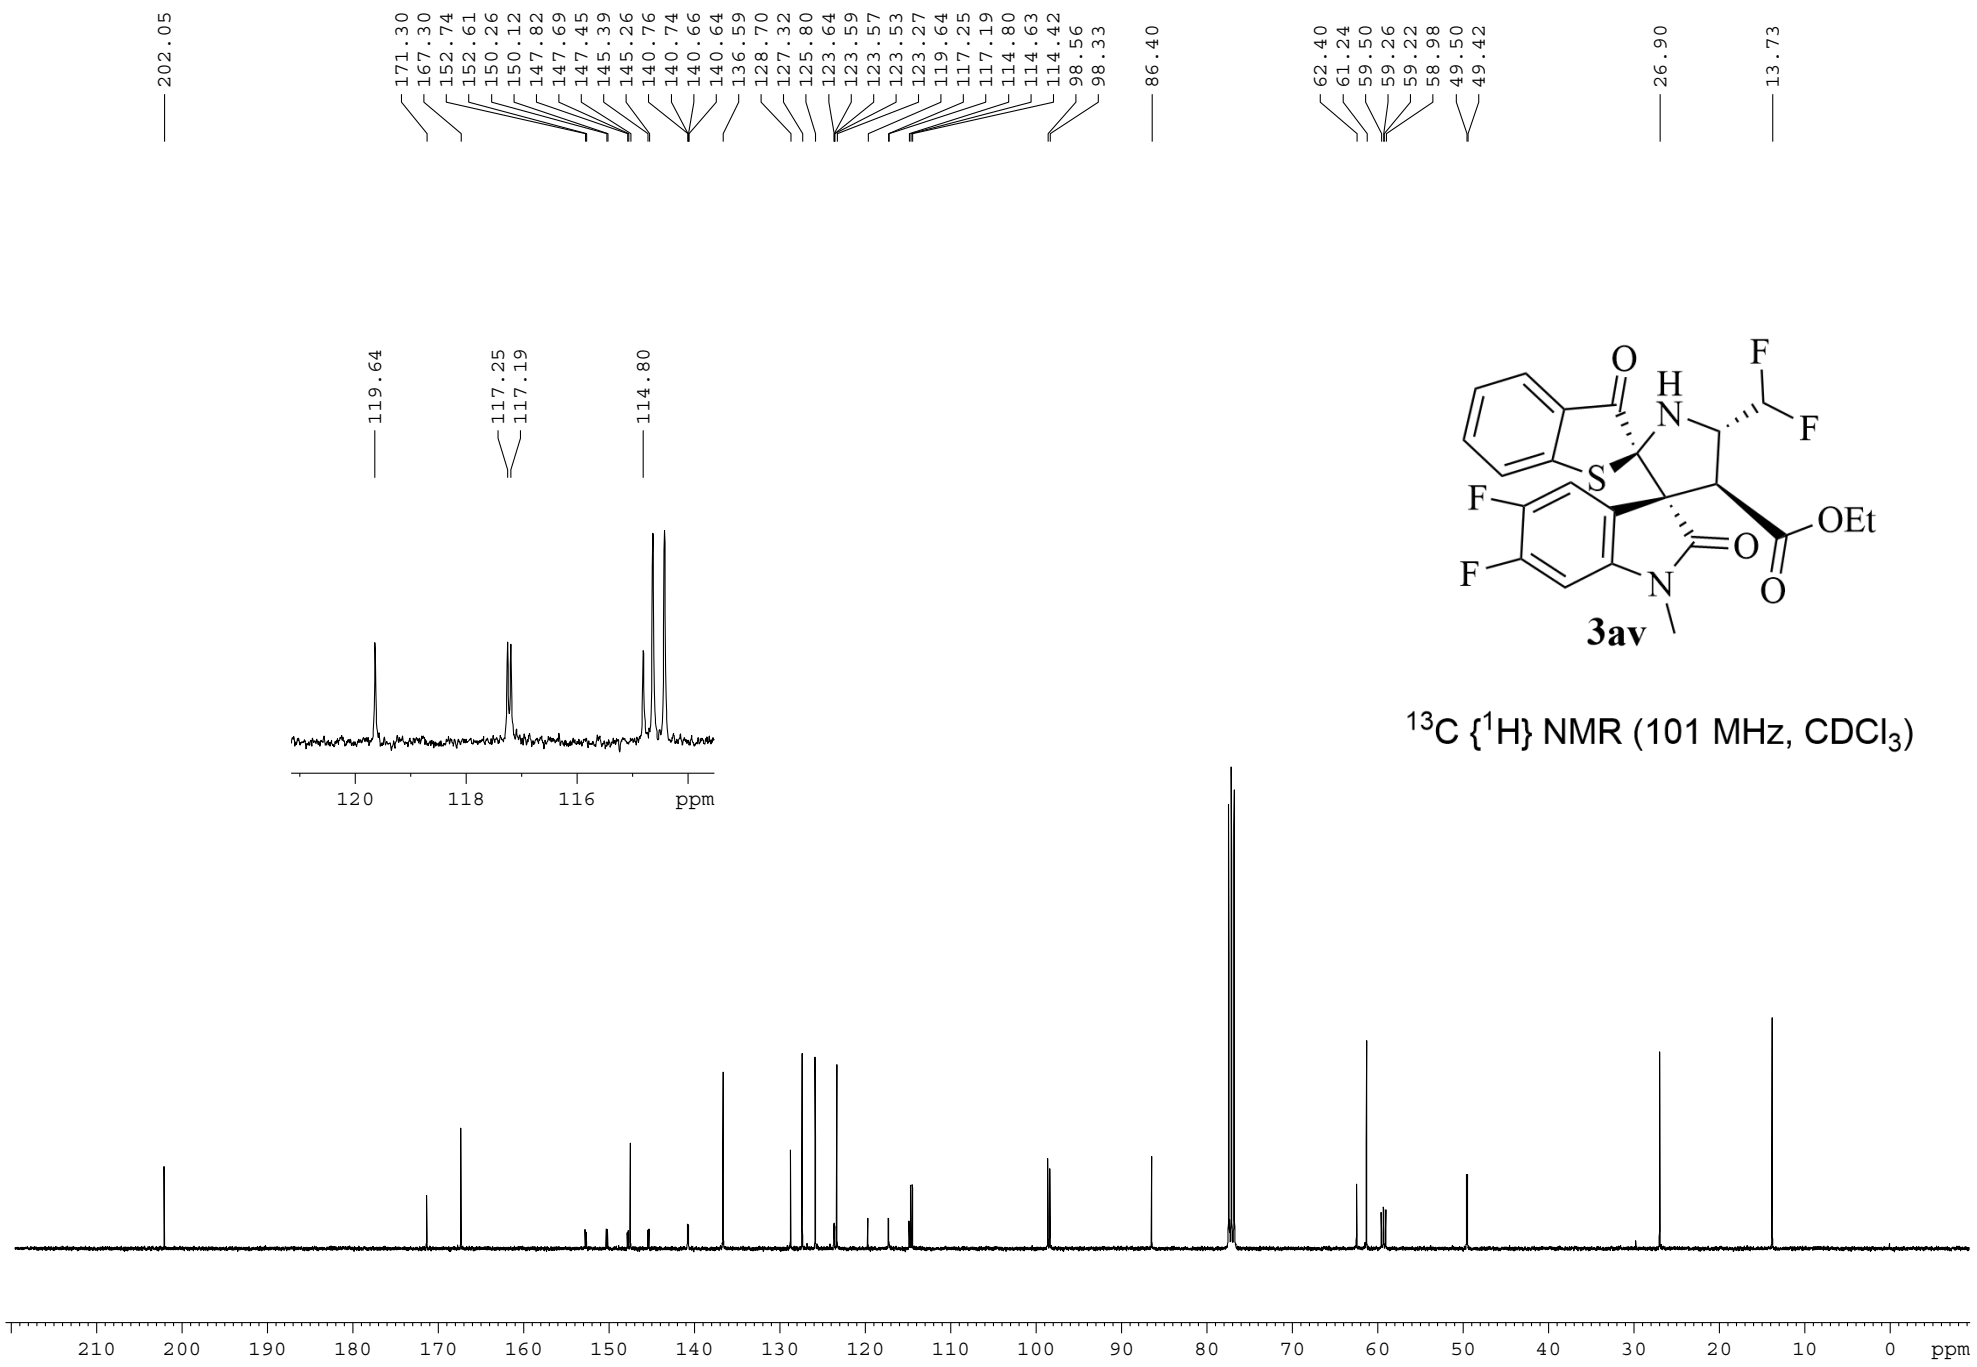

202.05

171.30  
167.30  
152.74  
150.26  
150.12  
147.82  
147.69  
147.45  
145.39  
145.26  
140.76  
140.74  
140.66  
140.64  
136.59  
128.70  
127.32  
125.80  
123.64  
123.59  
123.57  
123.53  
123.27  
119.64  
117.25  
117.19  
114.80  
114.63  
114.42  
98.56  
98.33

86.40

62.40  
61.24  
59.50  
59.26  
59.22  
58.98  
49.50  
49.42

26.90

13.73

119.64

117.25  
117.19

114.80

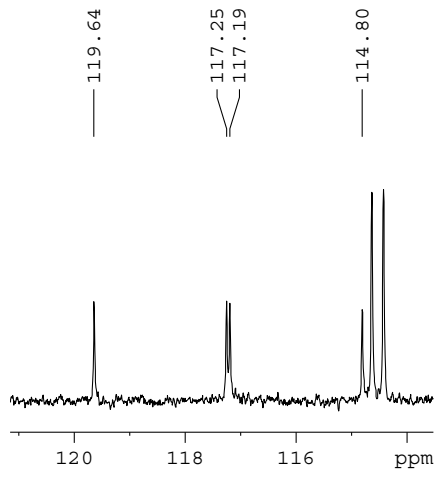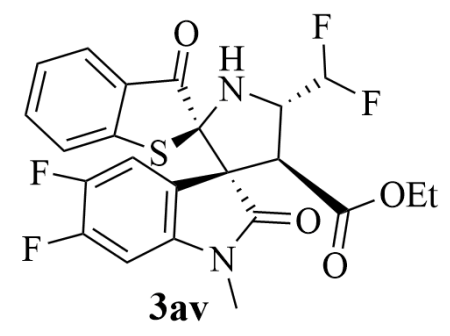

<sup>13</sup>C {<sup>1</sup>H} NMR (101 MHz, CDCl<sub>3</sub>)

— -118.868  
— -119.660

— -122.449  
— -123.240

— -133.520  
— -133.573

— -144.025  
— -144.078

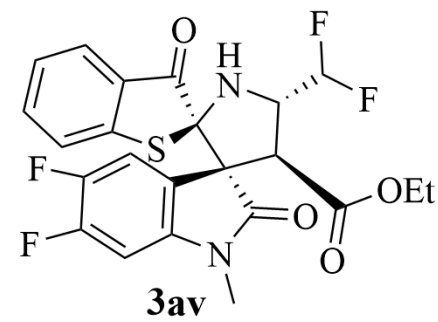

$^{19}\text{F}$  NMR (376 MHz,  $\text{CDCl}_3$ )

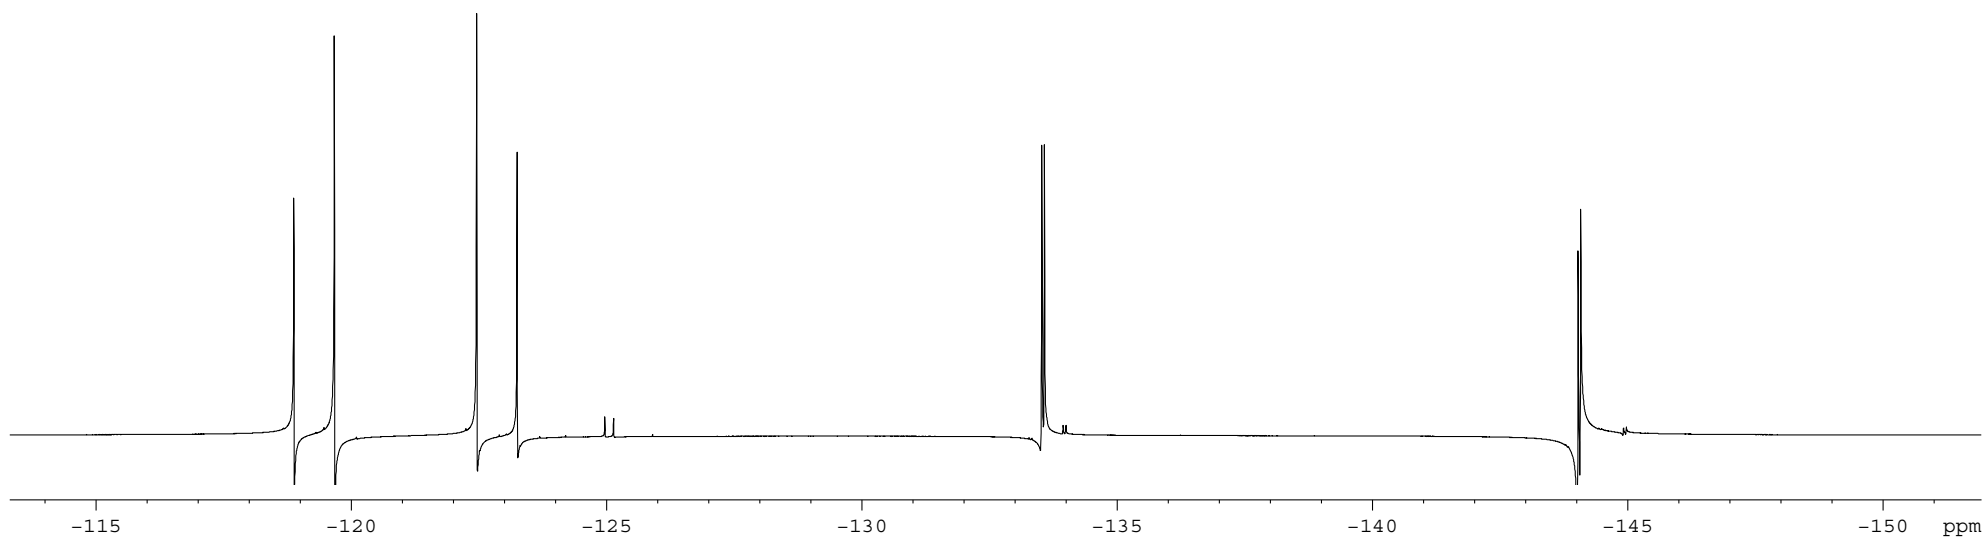

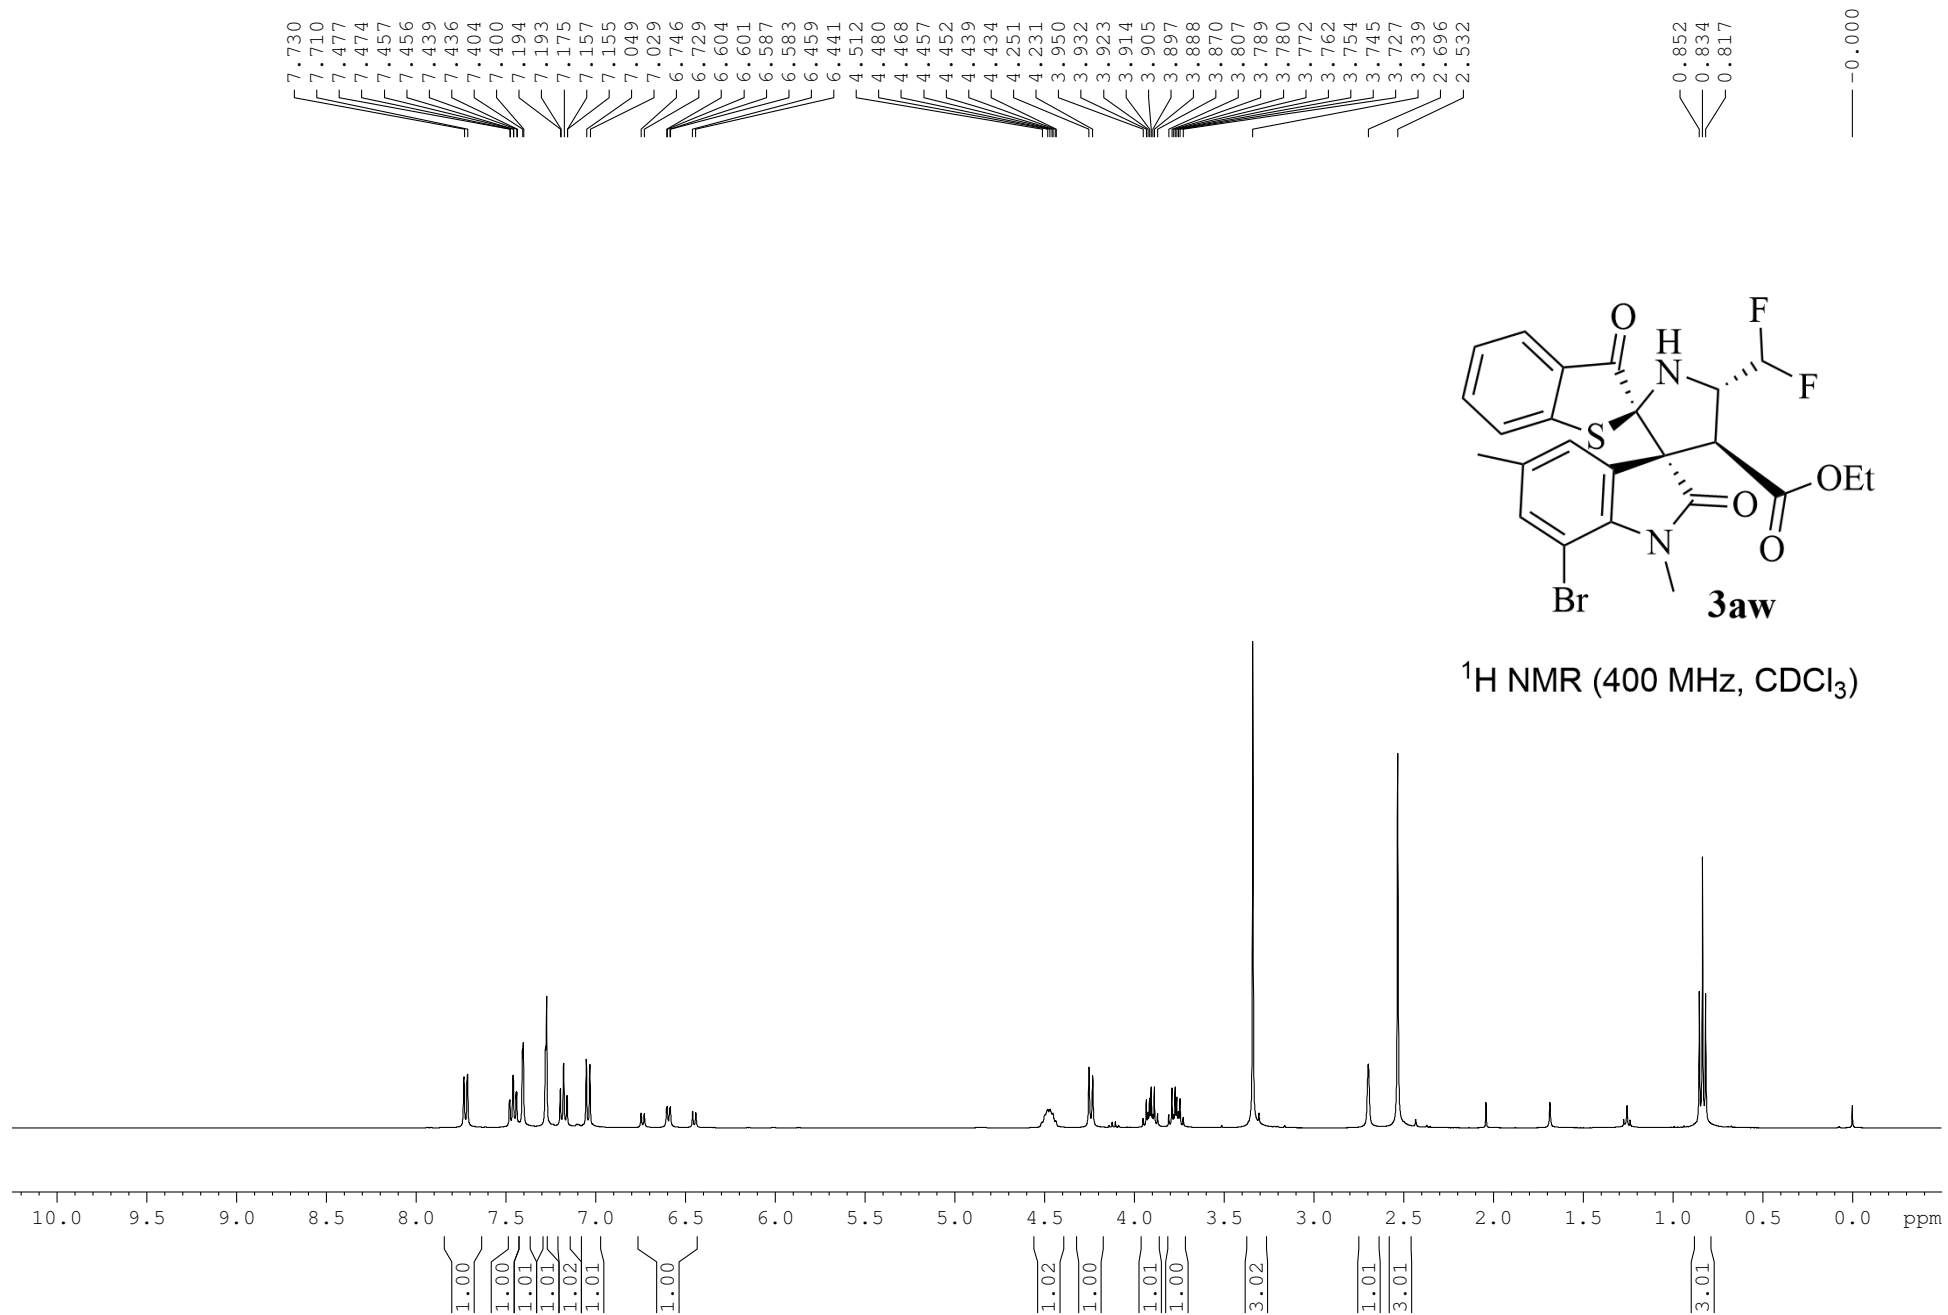

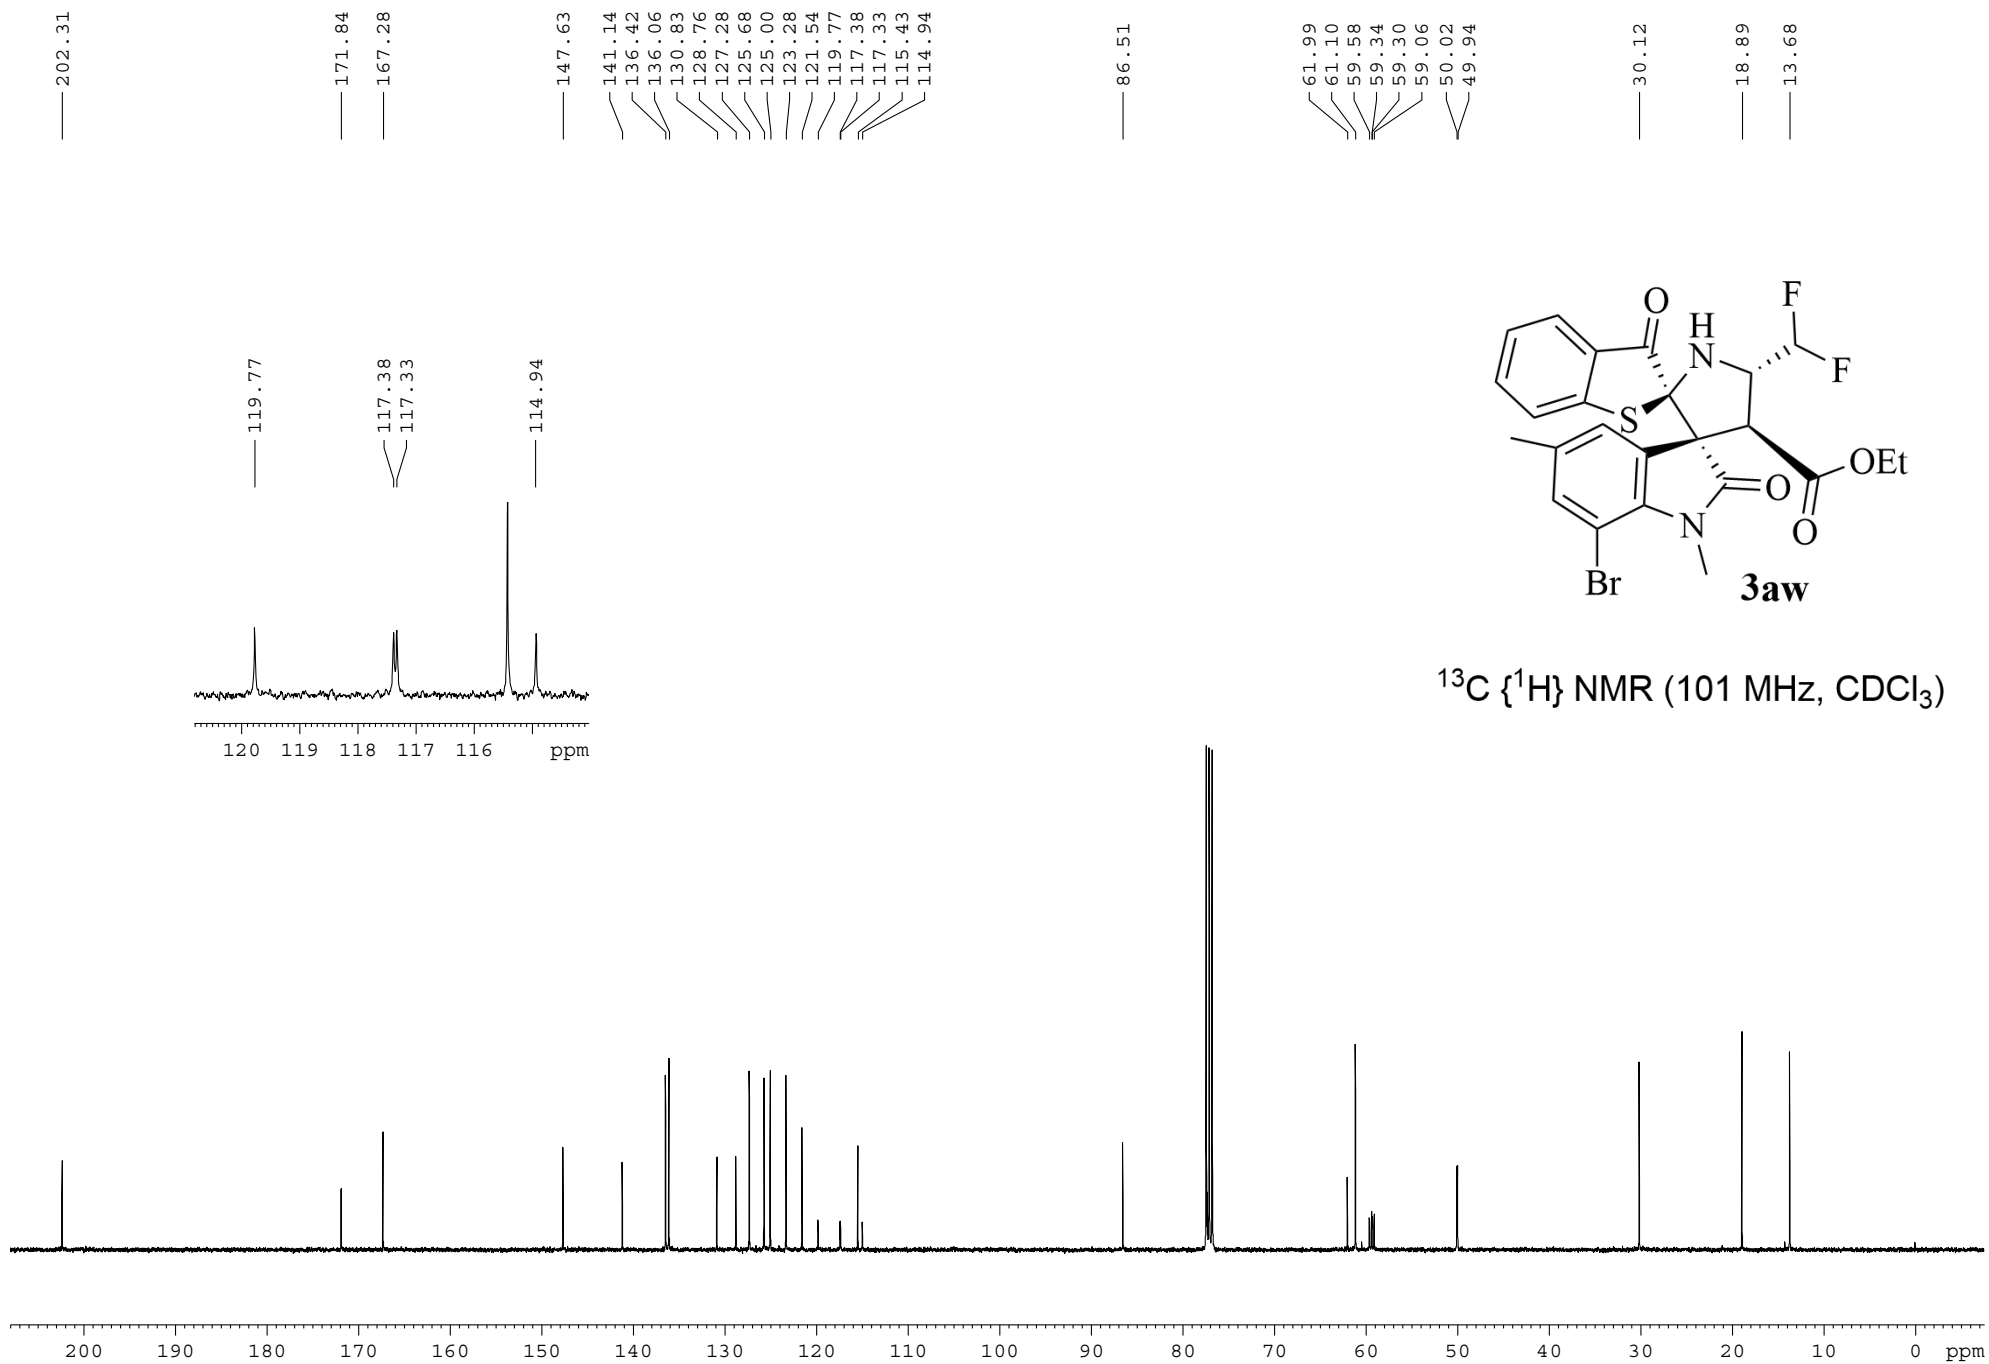



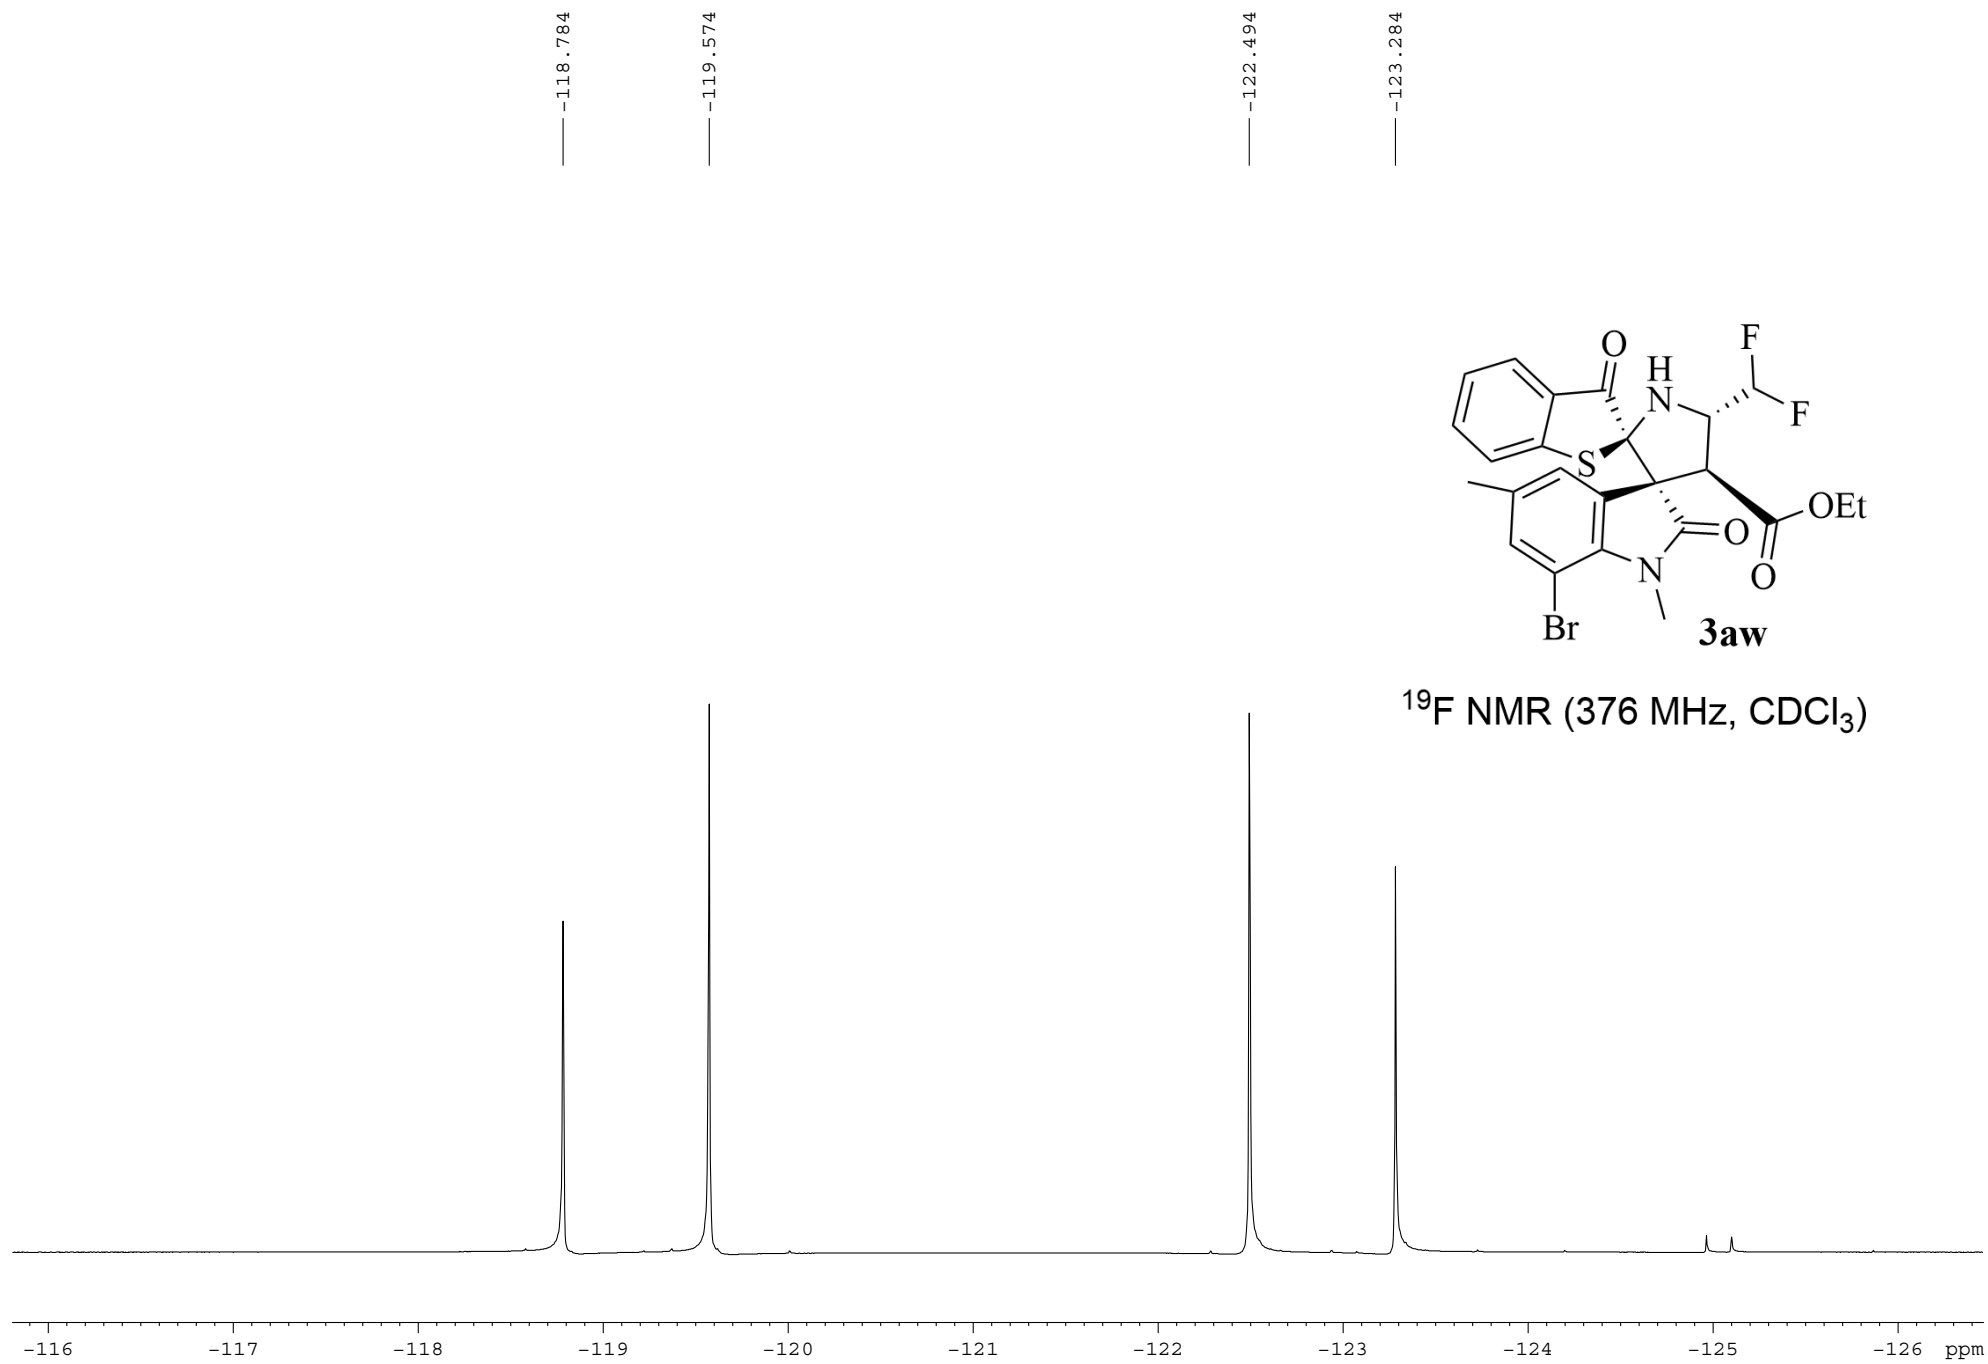

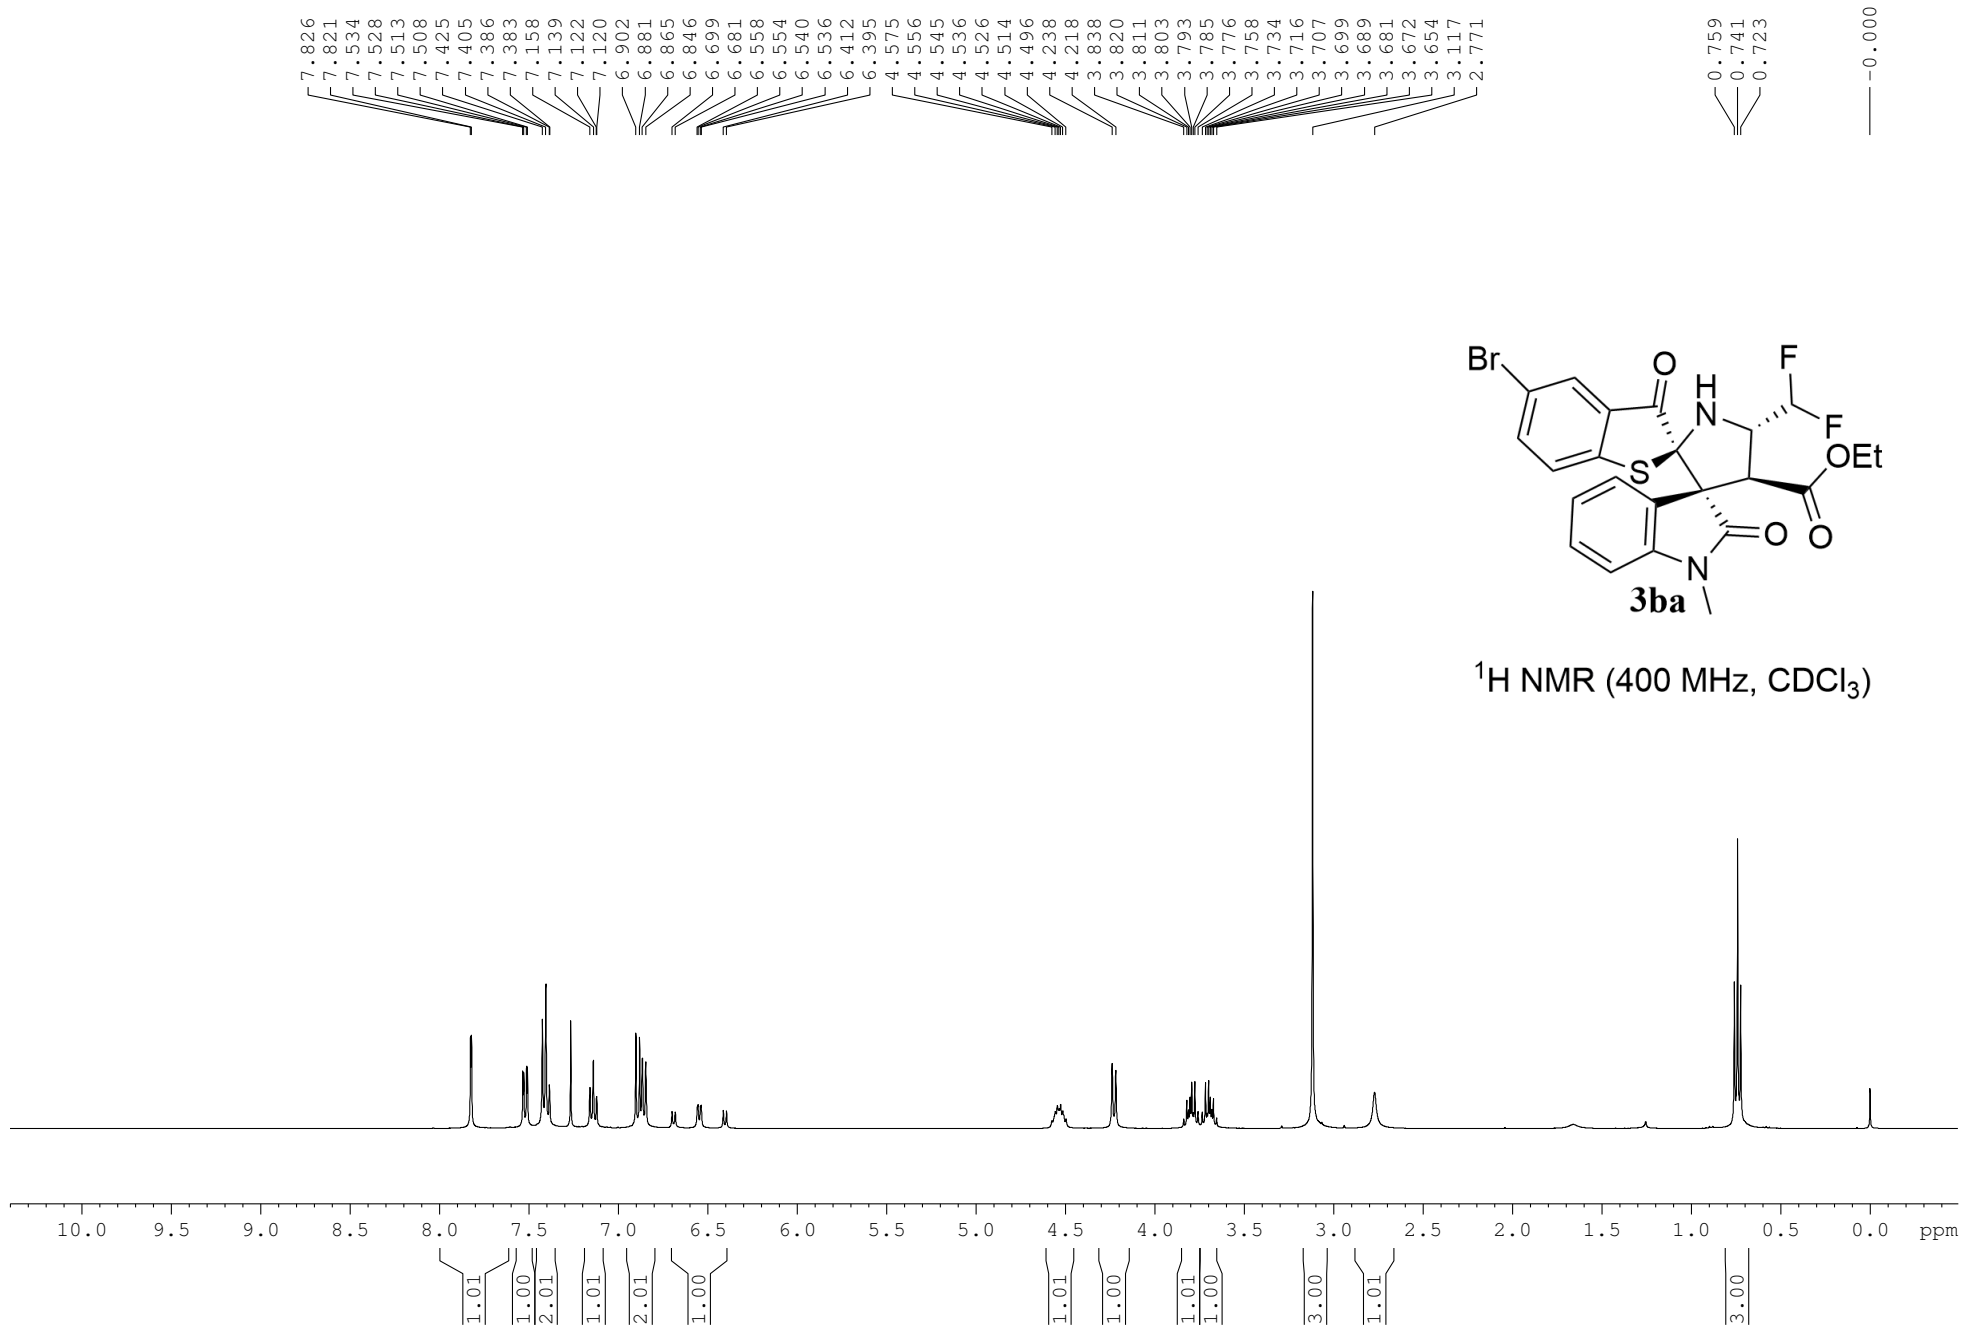

— 201.36

— 171.37

— 167.39

— 146.50

— 144.08

— 138.96

— 130.40

— 130.07

— 129.85

— 128.16

— 124.64

— 124.22

— 123.29

— 119.76

— 119.04

— 117.37

— 117.31

— 114.92

— 108.16

— 87.27

— 62.60

— 61.06

— 59.83

— 59.59

— 59.54

— 59.30

— 49.70

— 49.62

— 26.72

— 13.57

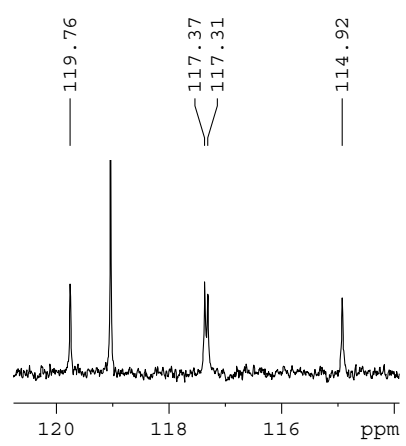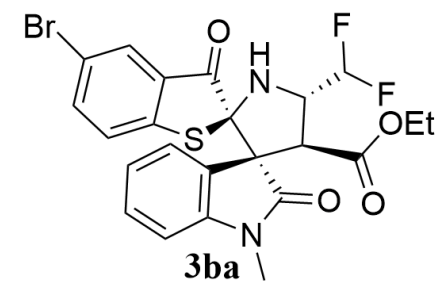

$^{13}\text{C} \{^1\text{H}\}$  NMR (101 MHz,  $\text{CDCl}_3$ )

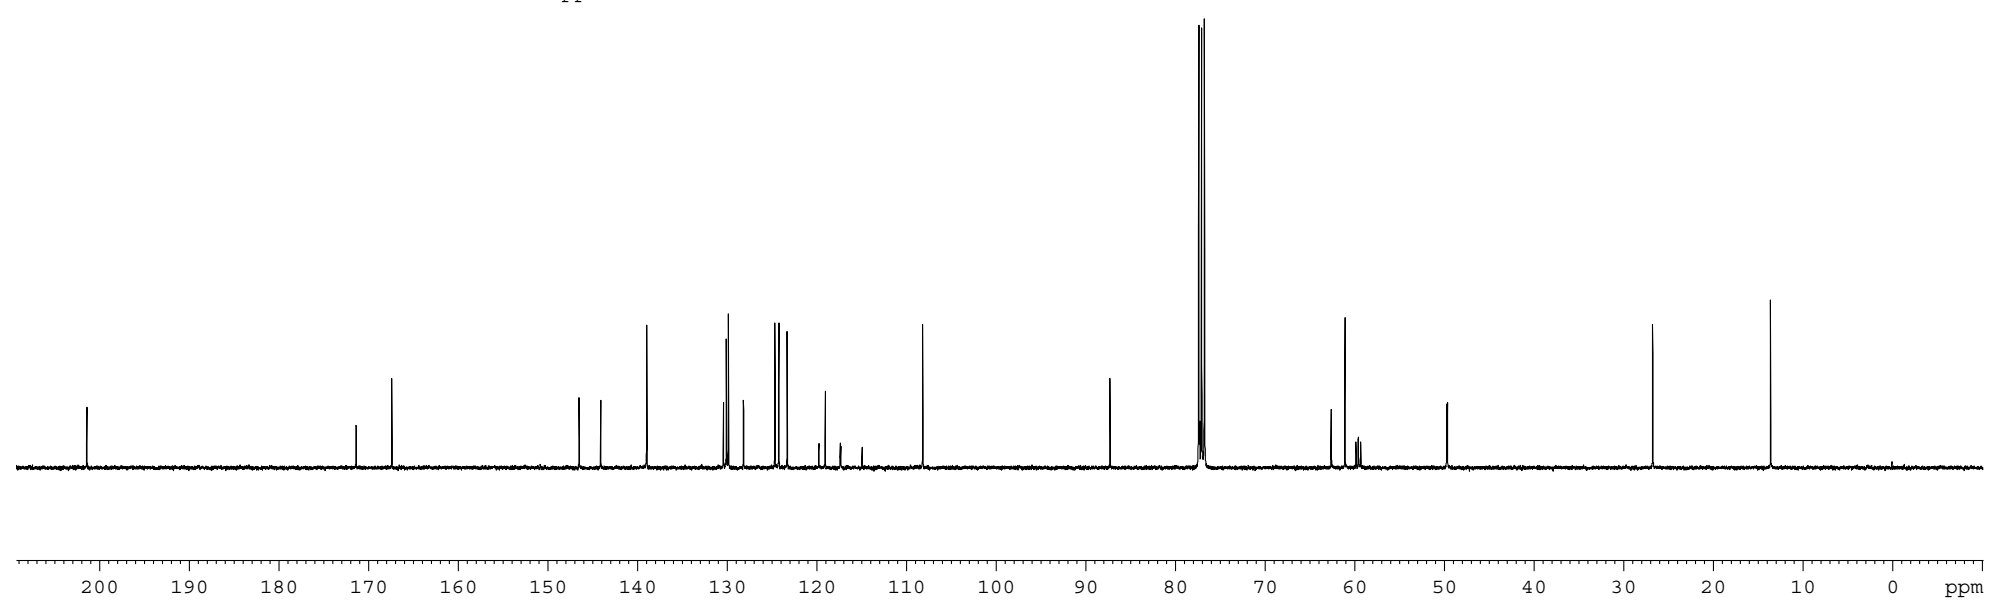

— -118.879

— -119.668

— -122.577

— -123.365

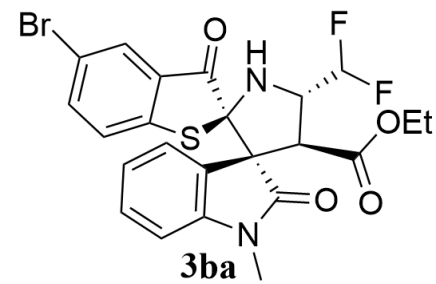

$^{19}\text{F}$  NMR (376 MHz,  $\text{CDCl}_3$ )

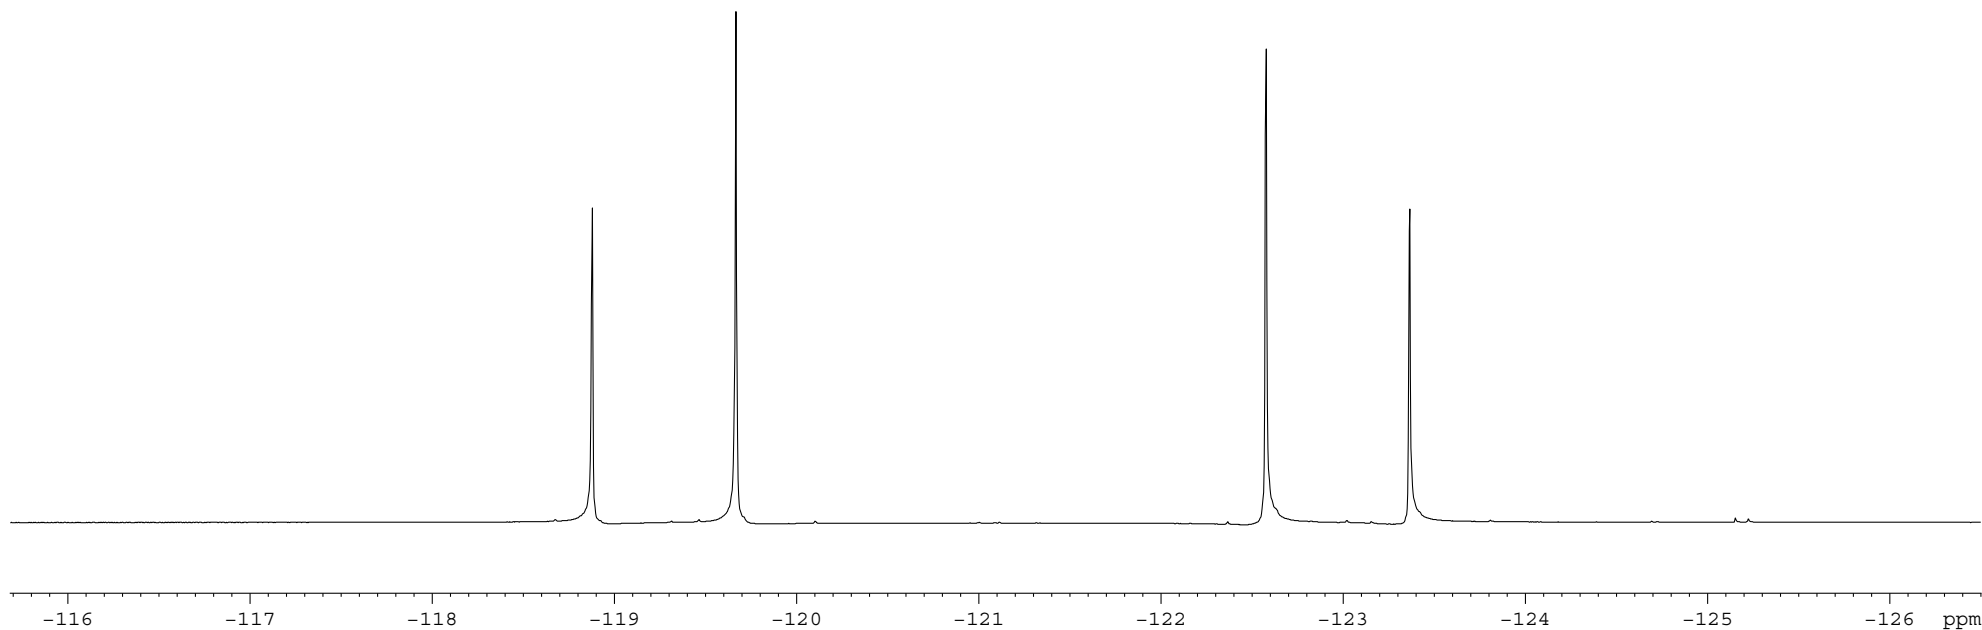

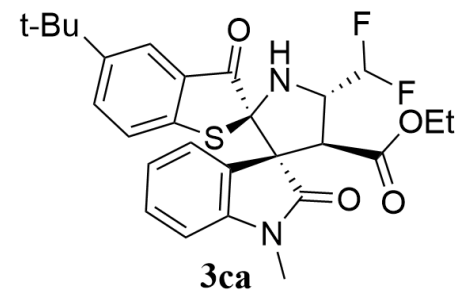

$^1\text{H NMR}$  (400 MHz,  $\text{CDCl}_3$ )

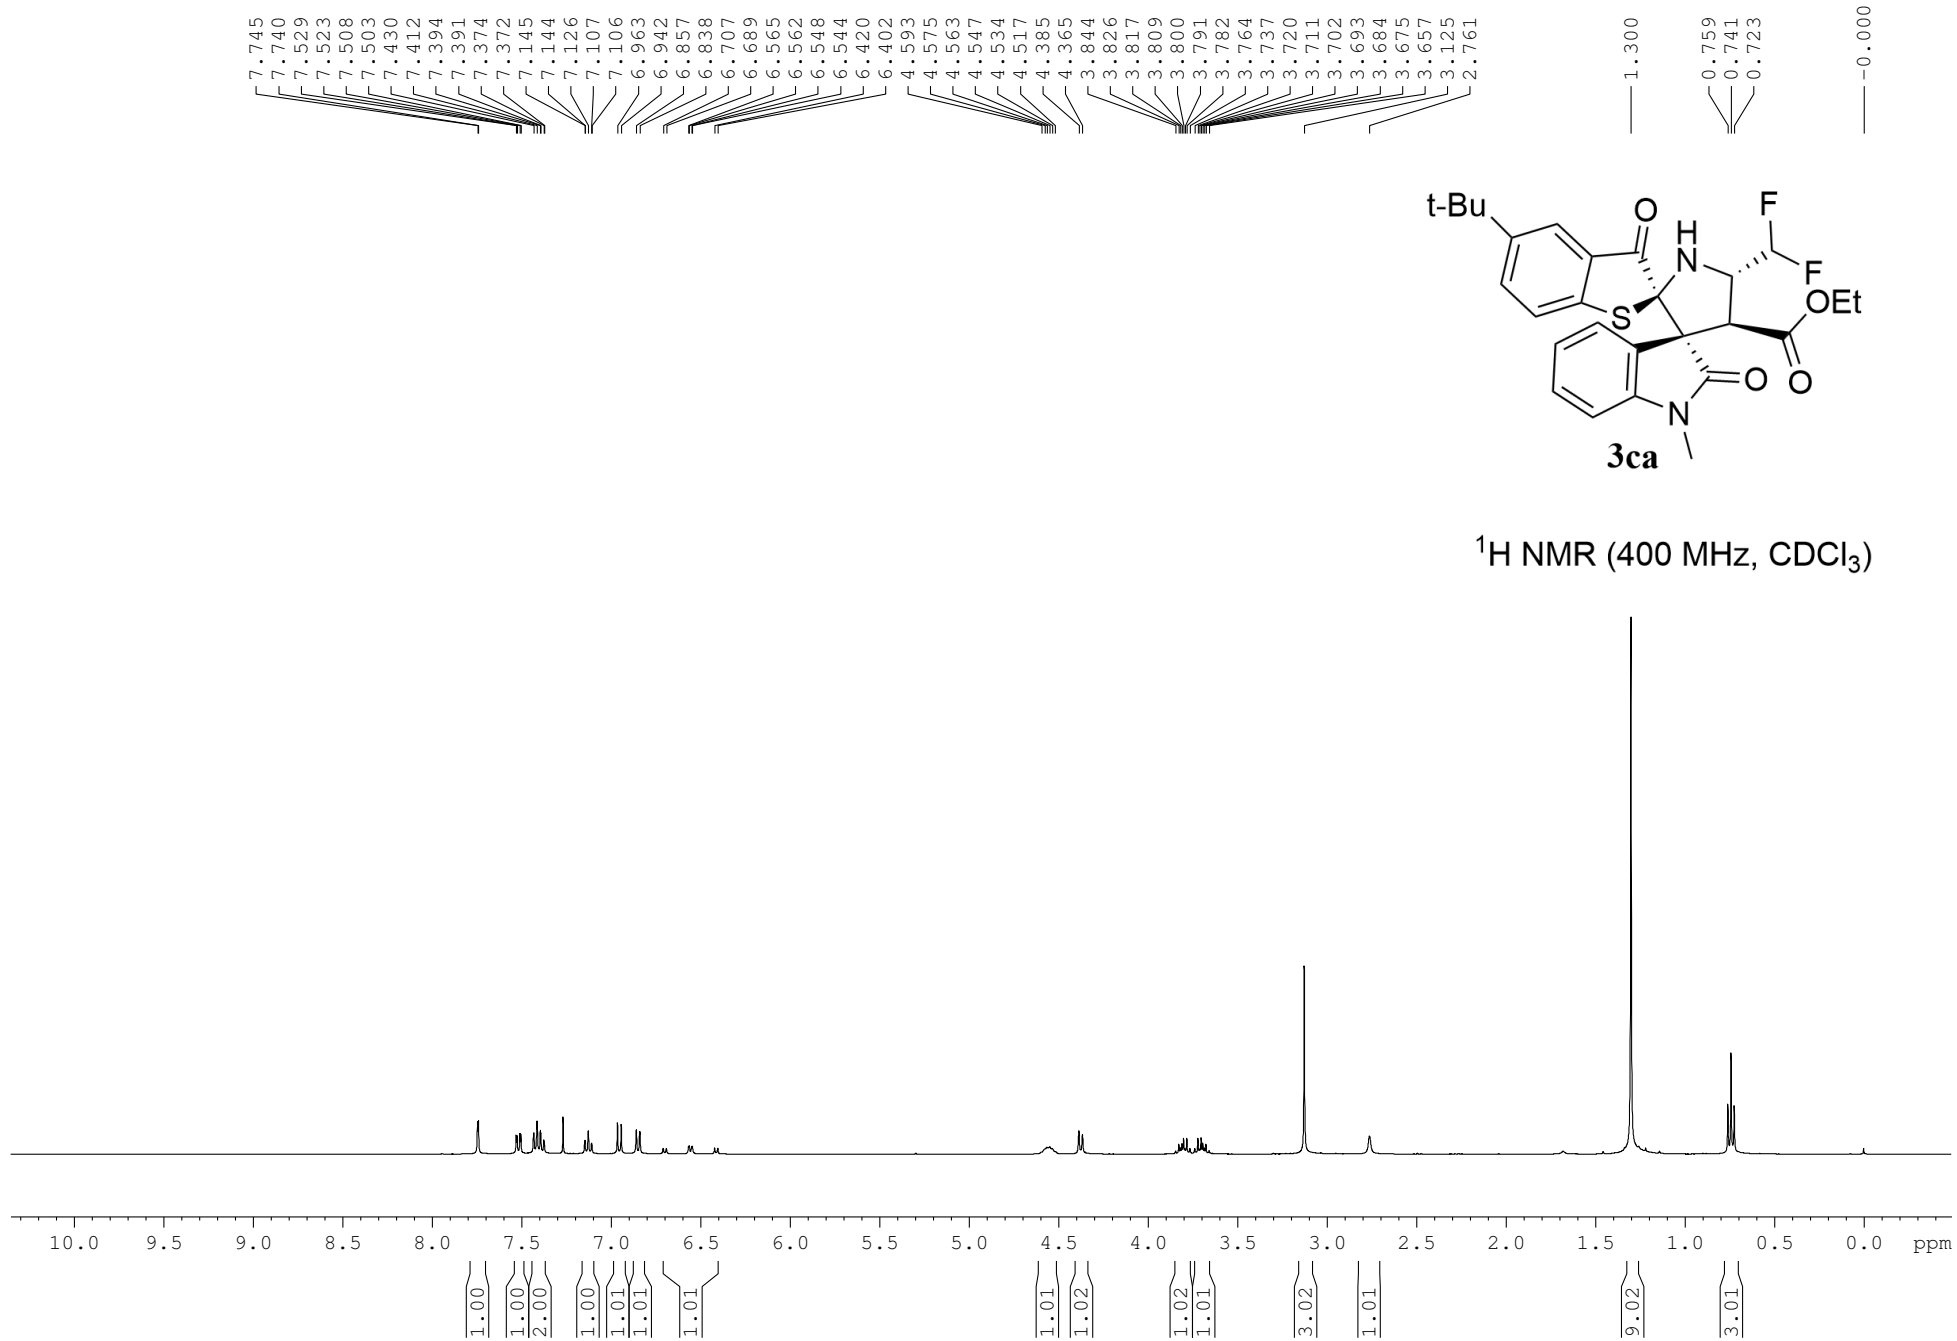

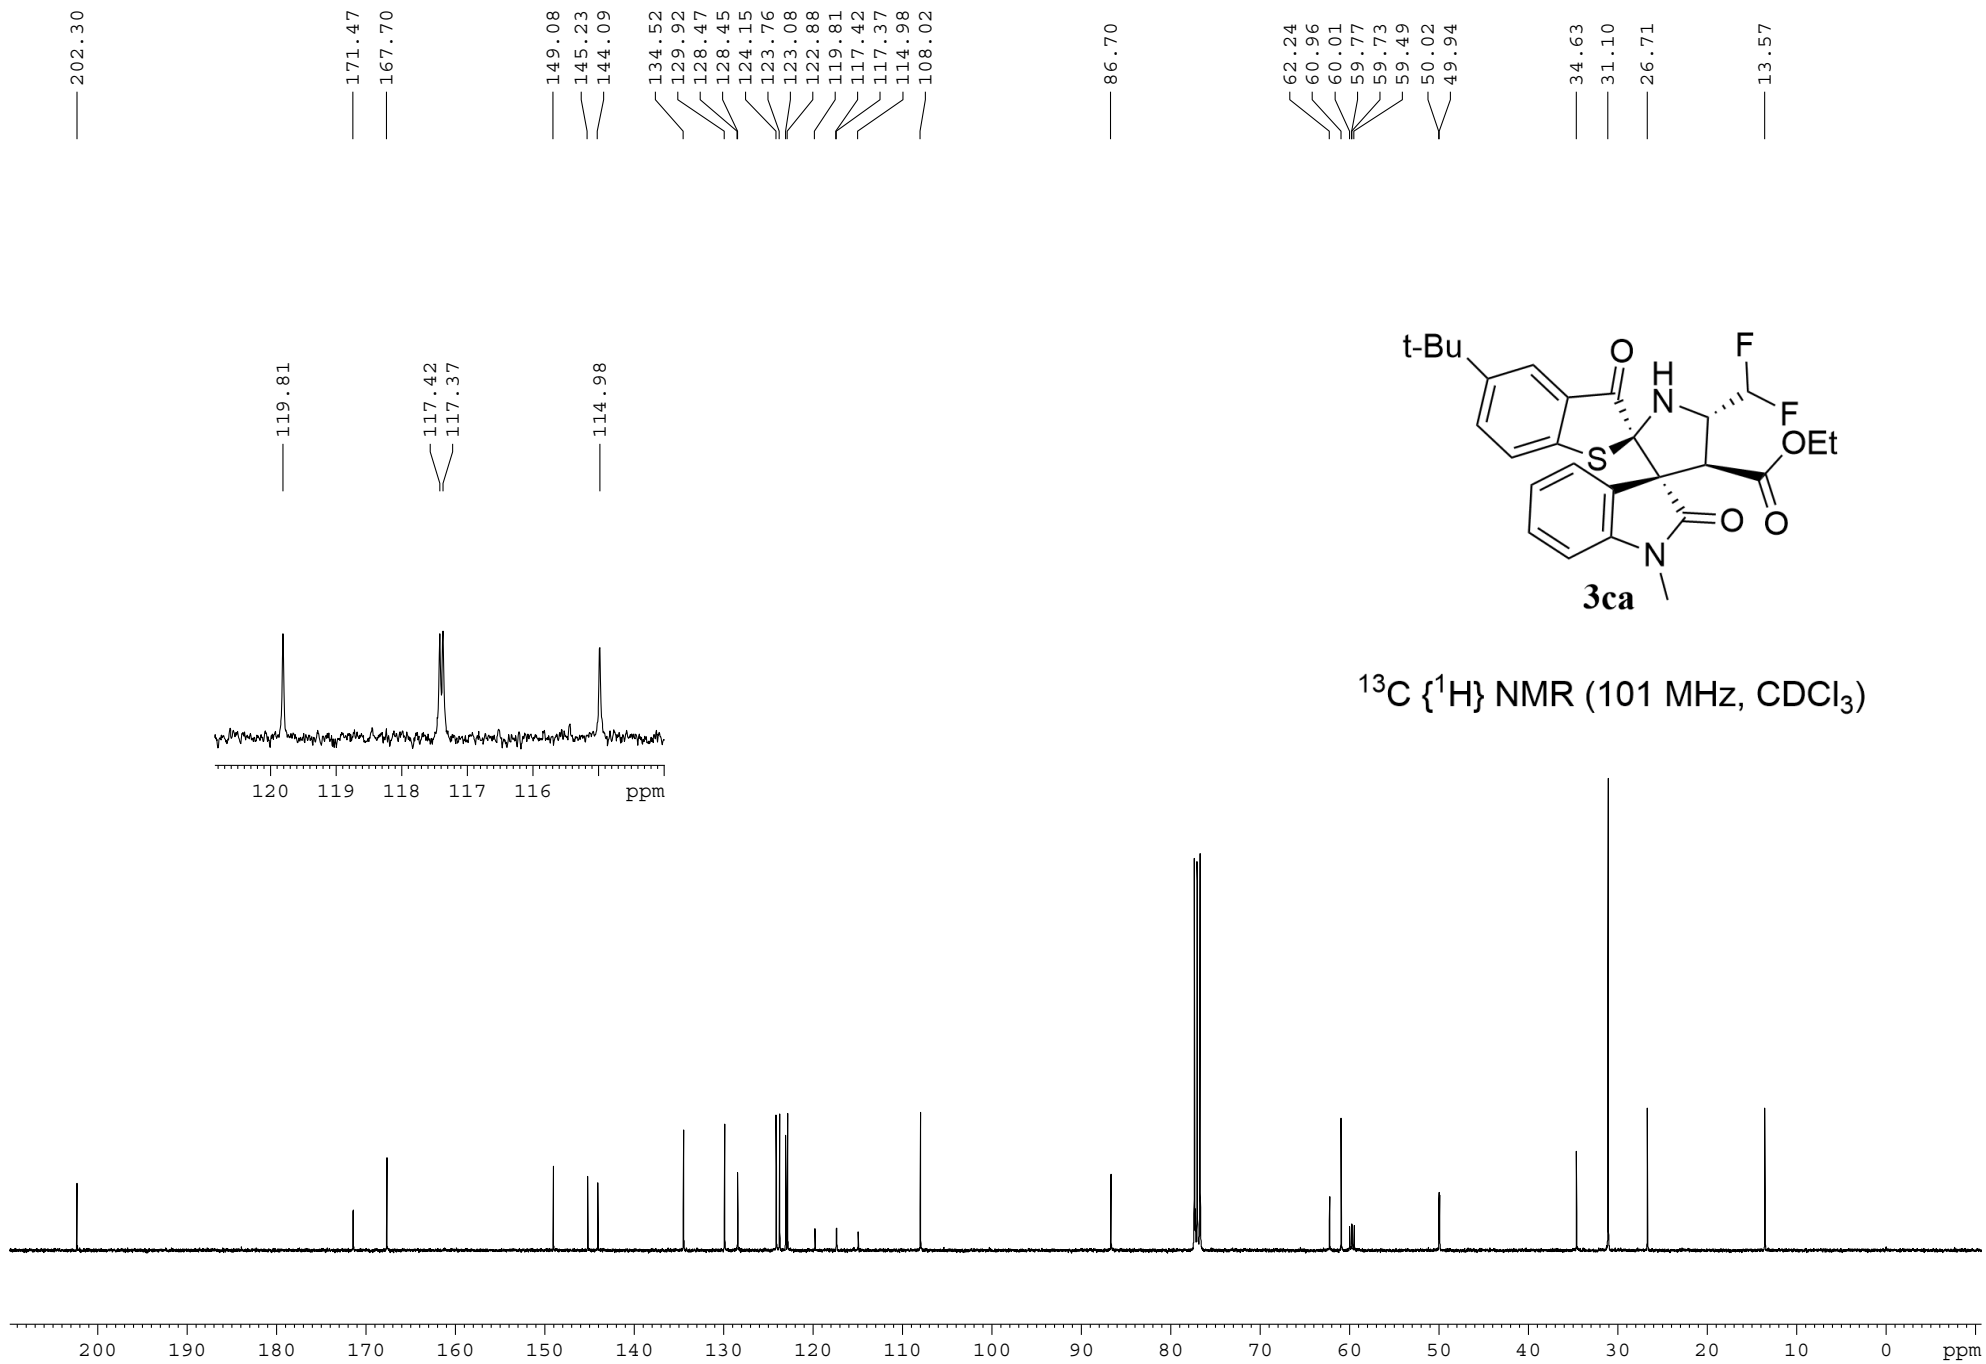

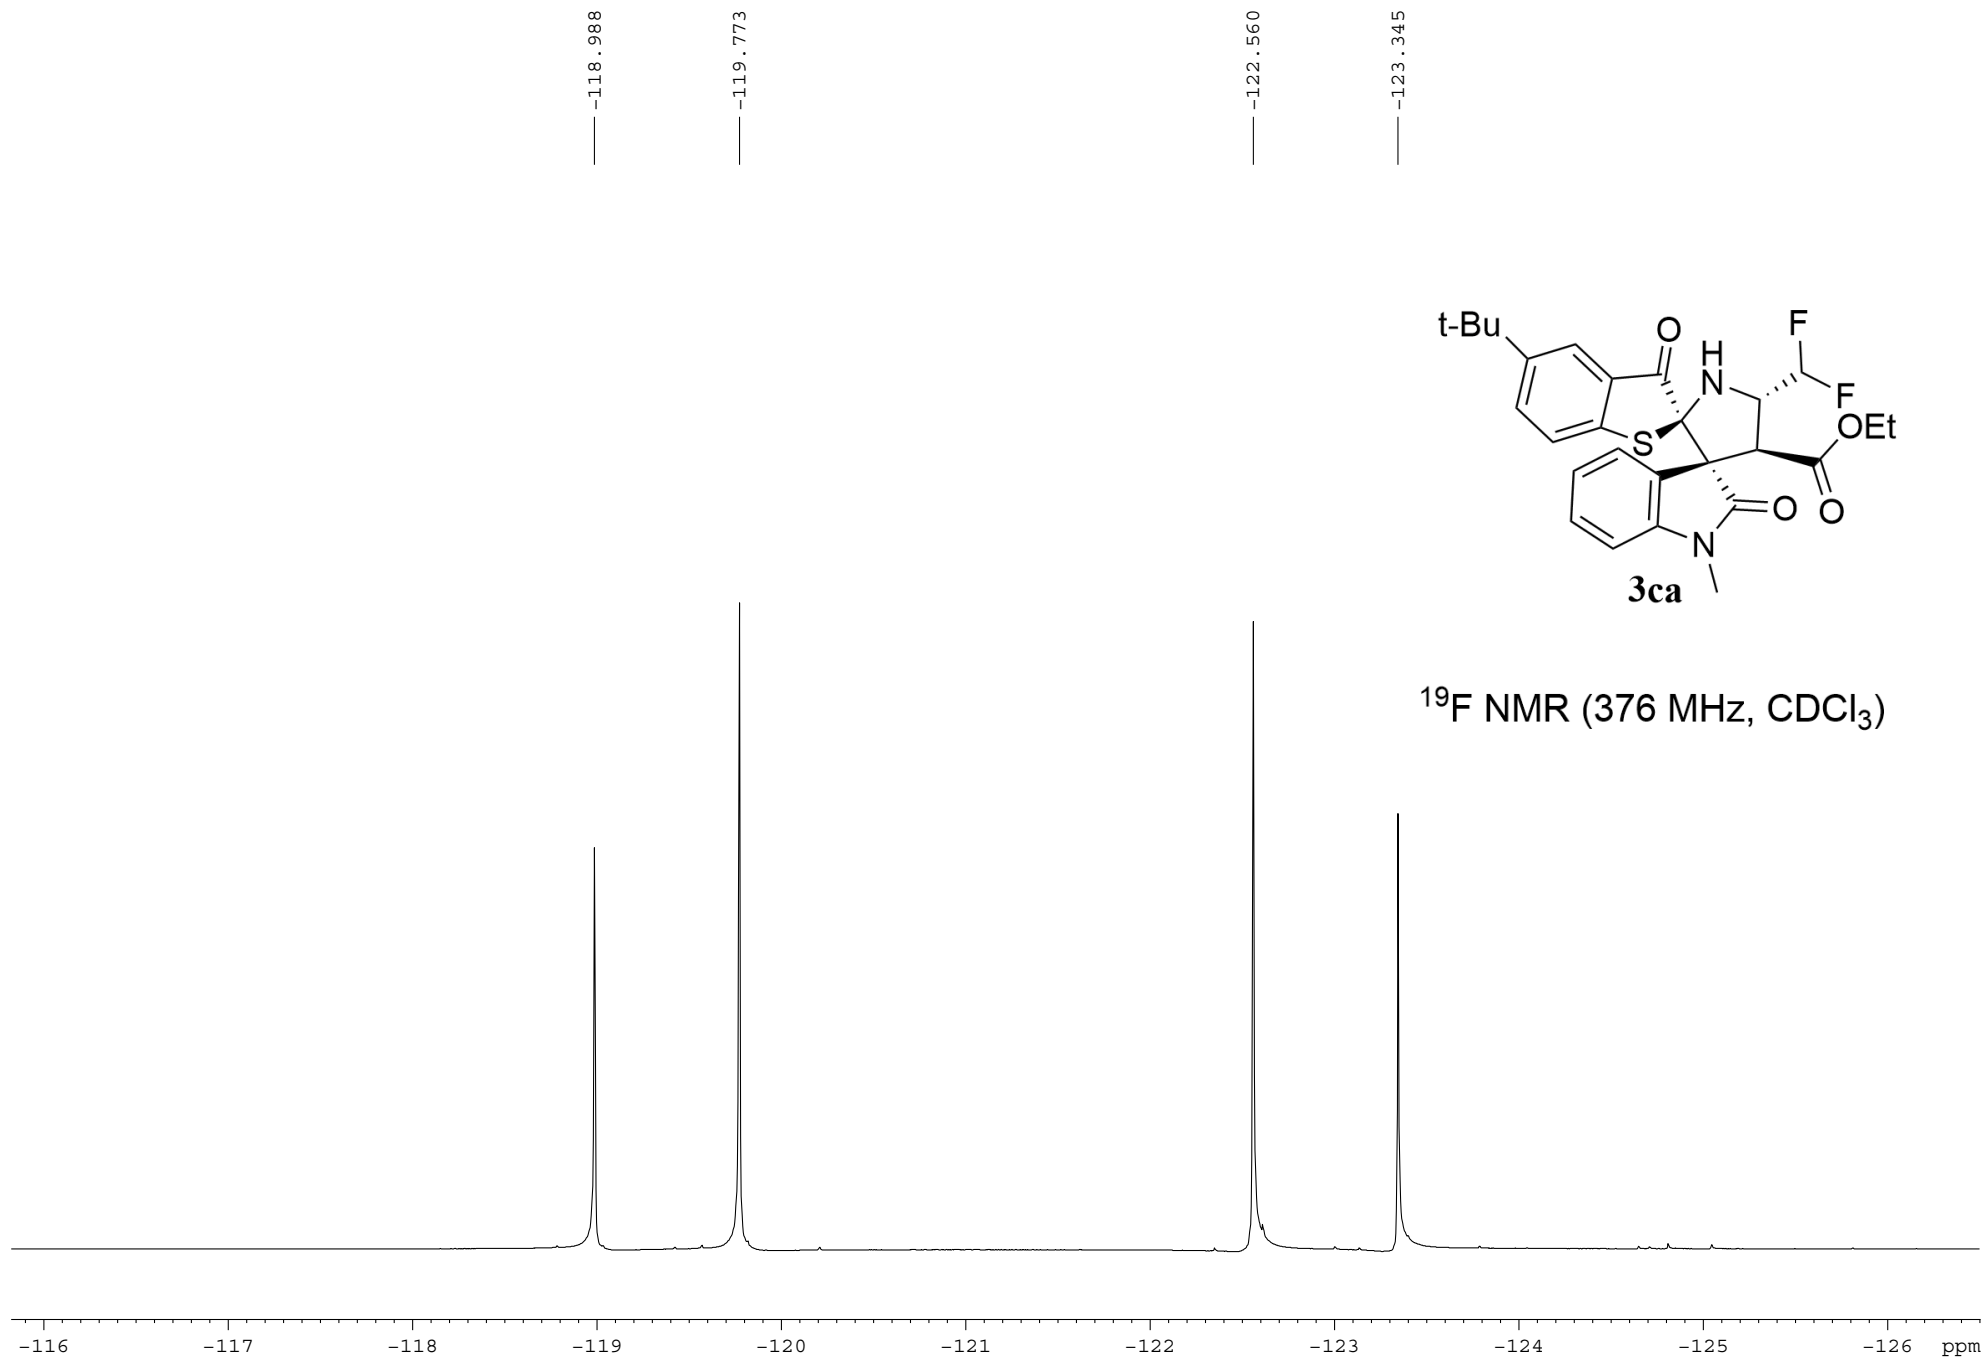

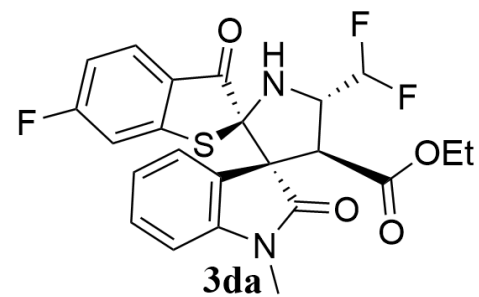

<sup>1</sup>H NMR (400 MHz, CDCl<sub>3</sub>)

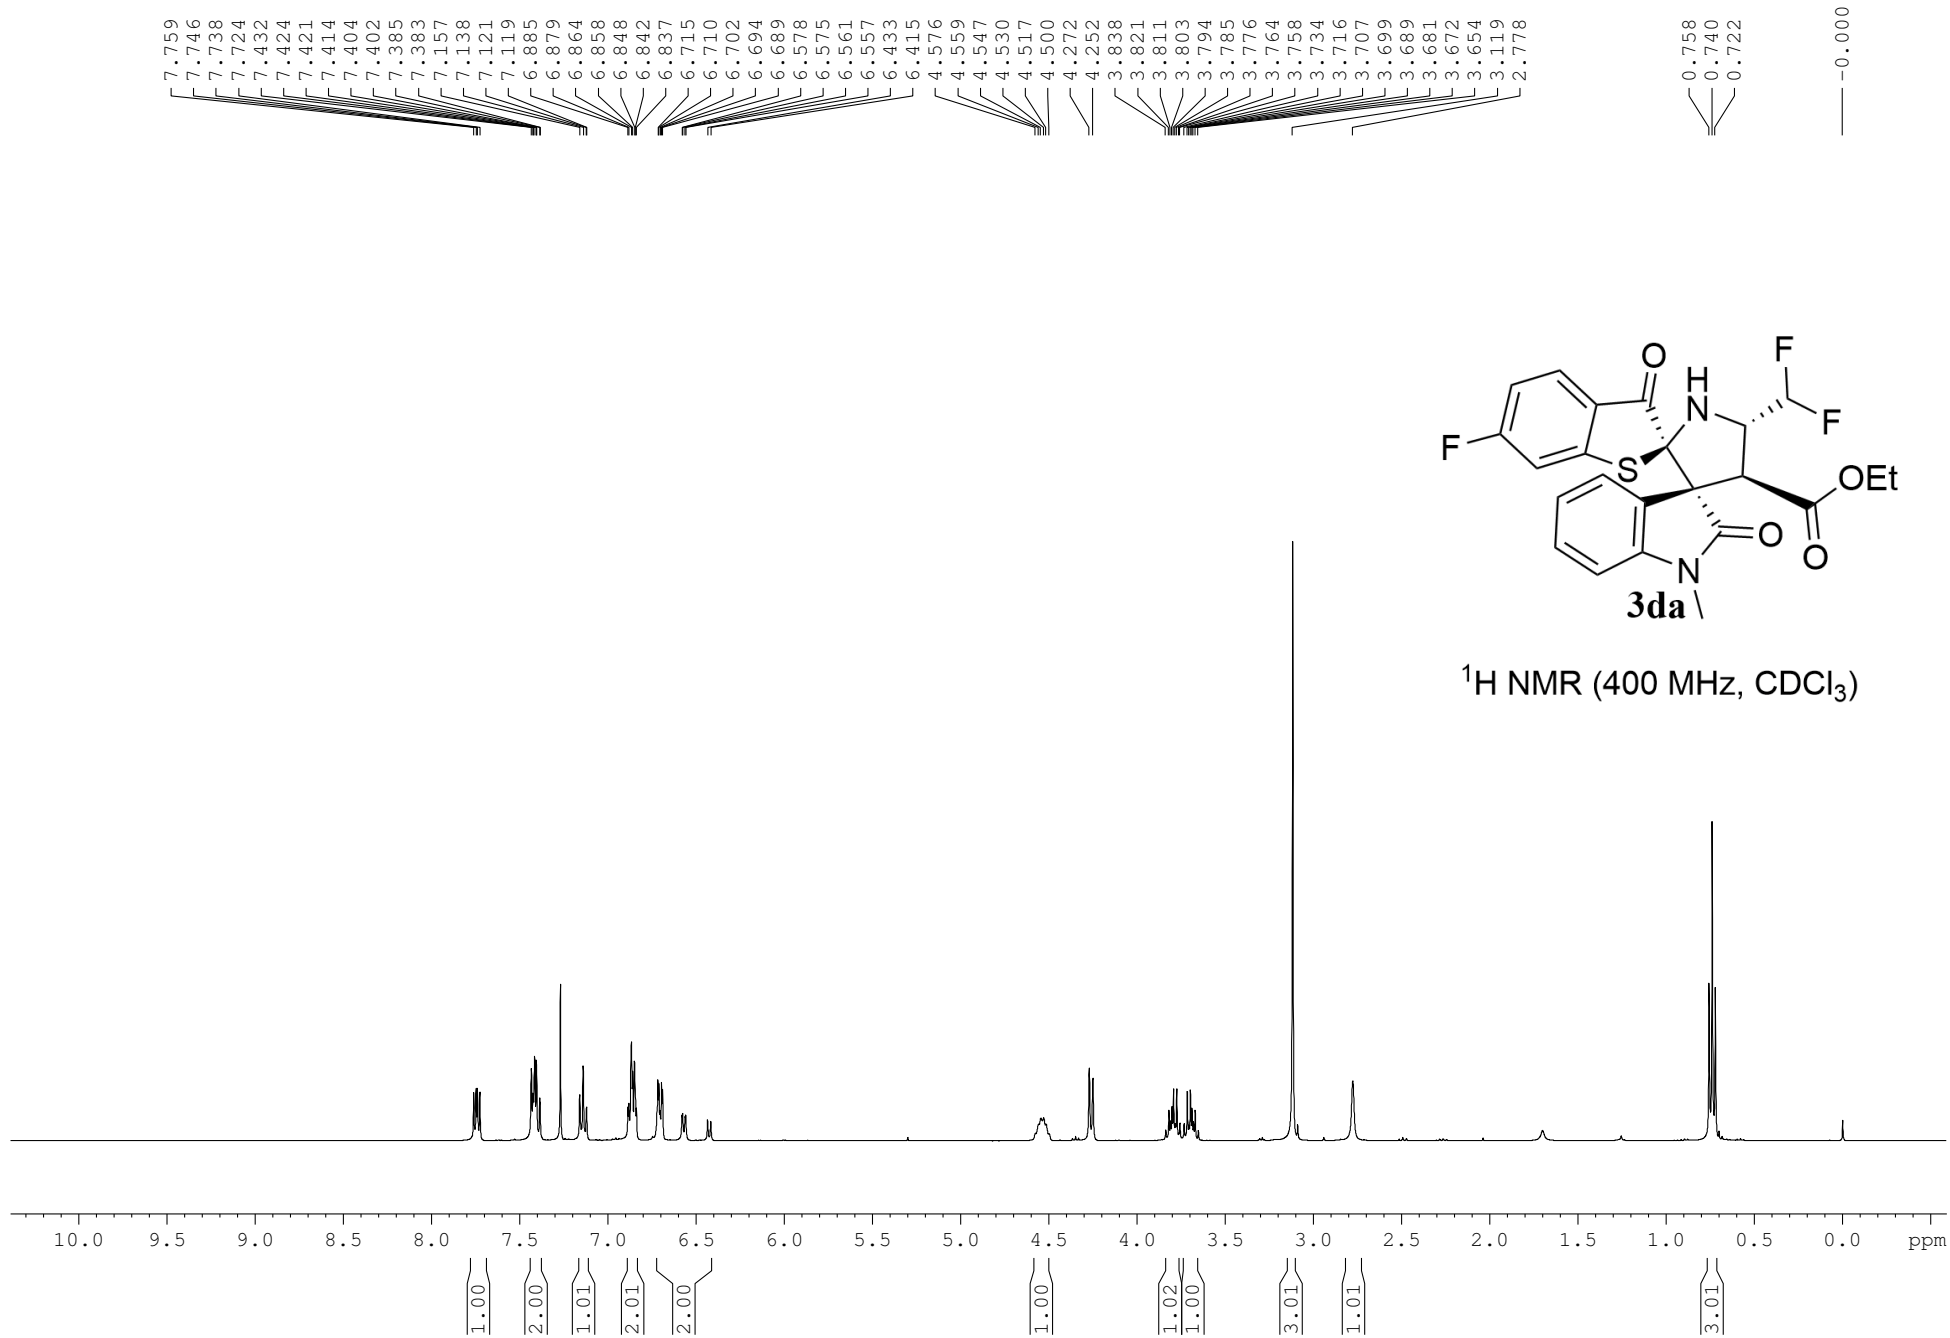



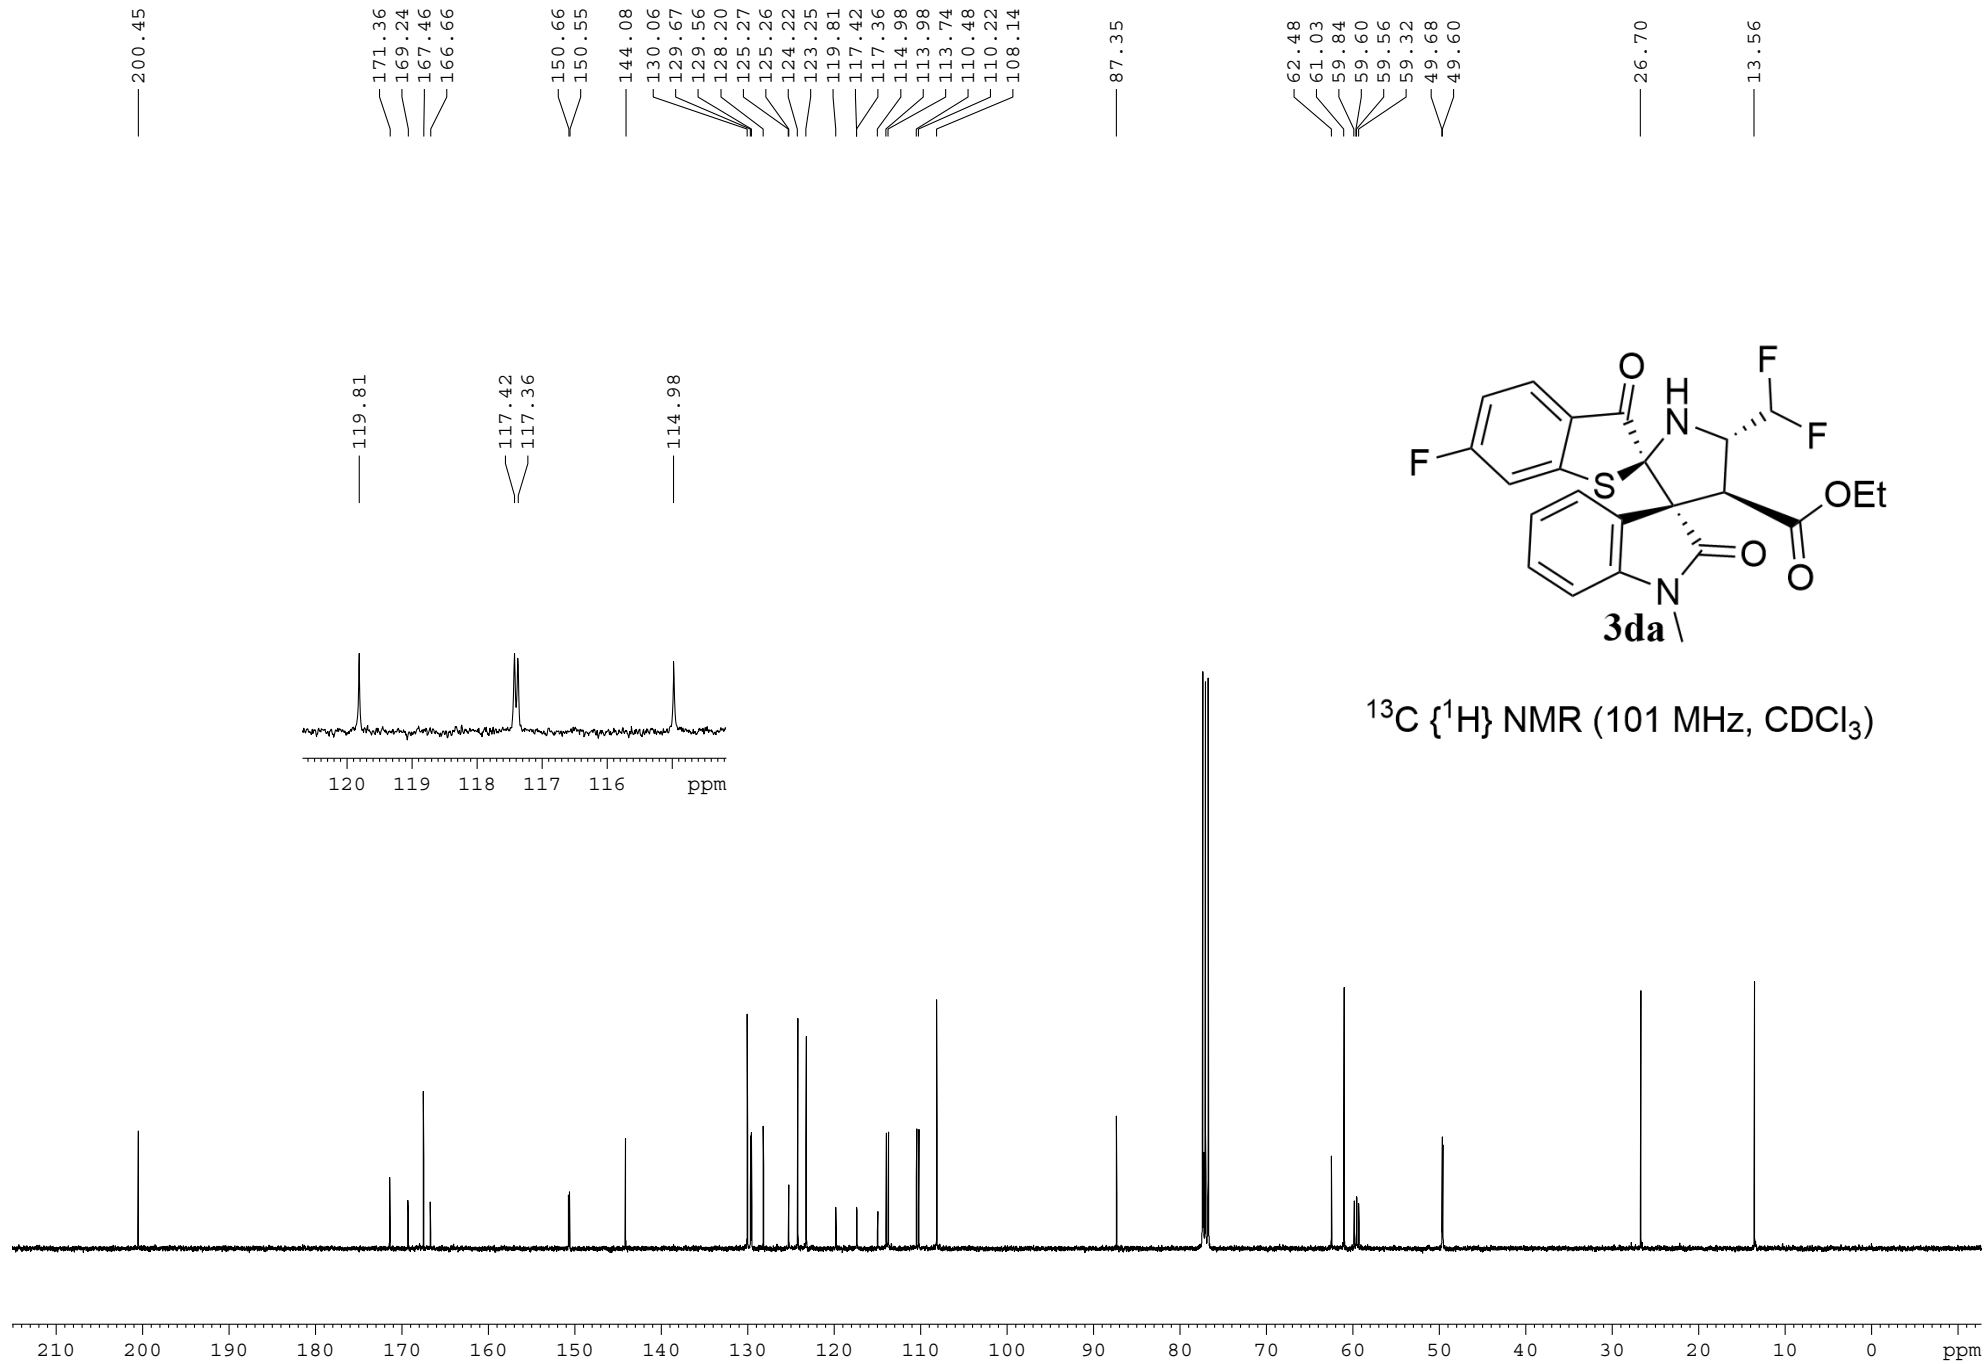

— -99.101

— -118.948

— -119.735

— -122.612

— -123.400

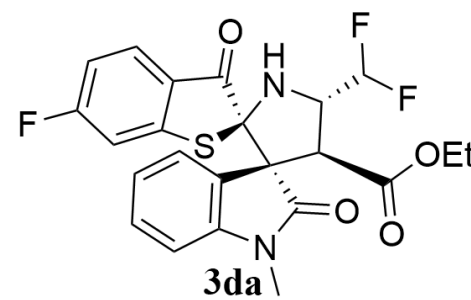

$^{19}\text{F}$  NMR (376 MHz,  $\text{CDCl}_3$ )

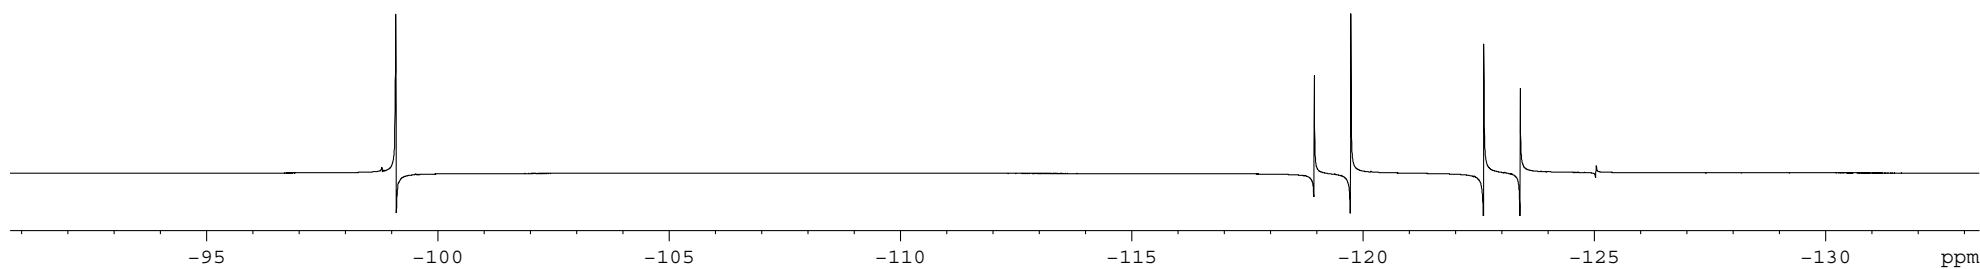

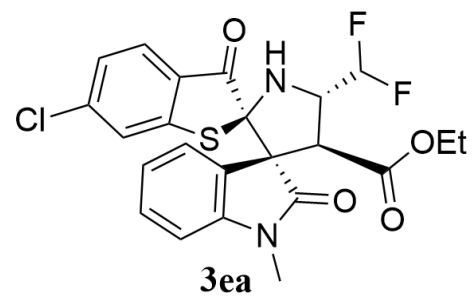

$^1\text{H}$  NMR (400 MHz,  $\text{CDCl}_3$ )

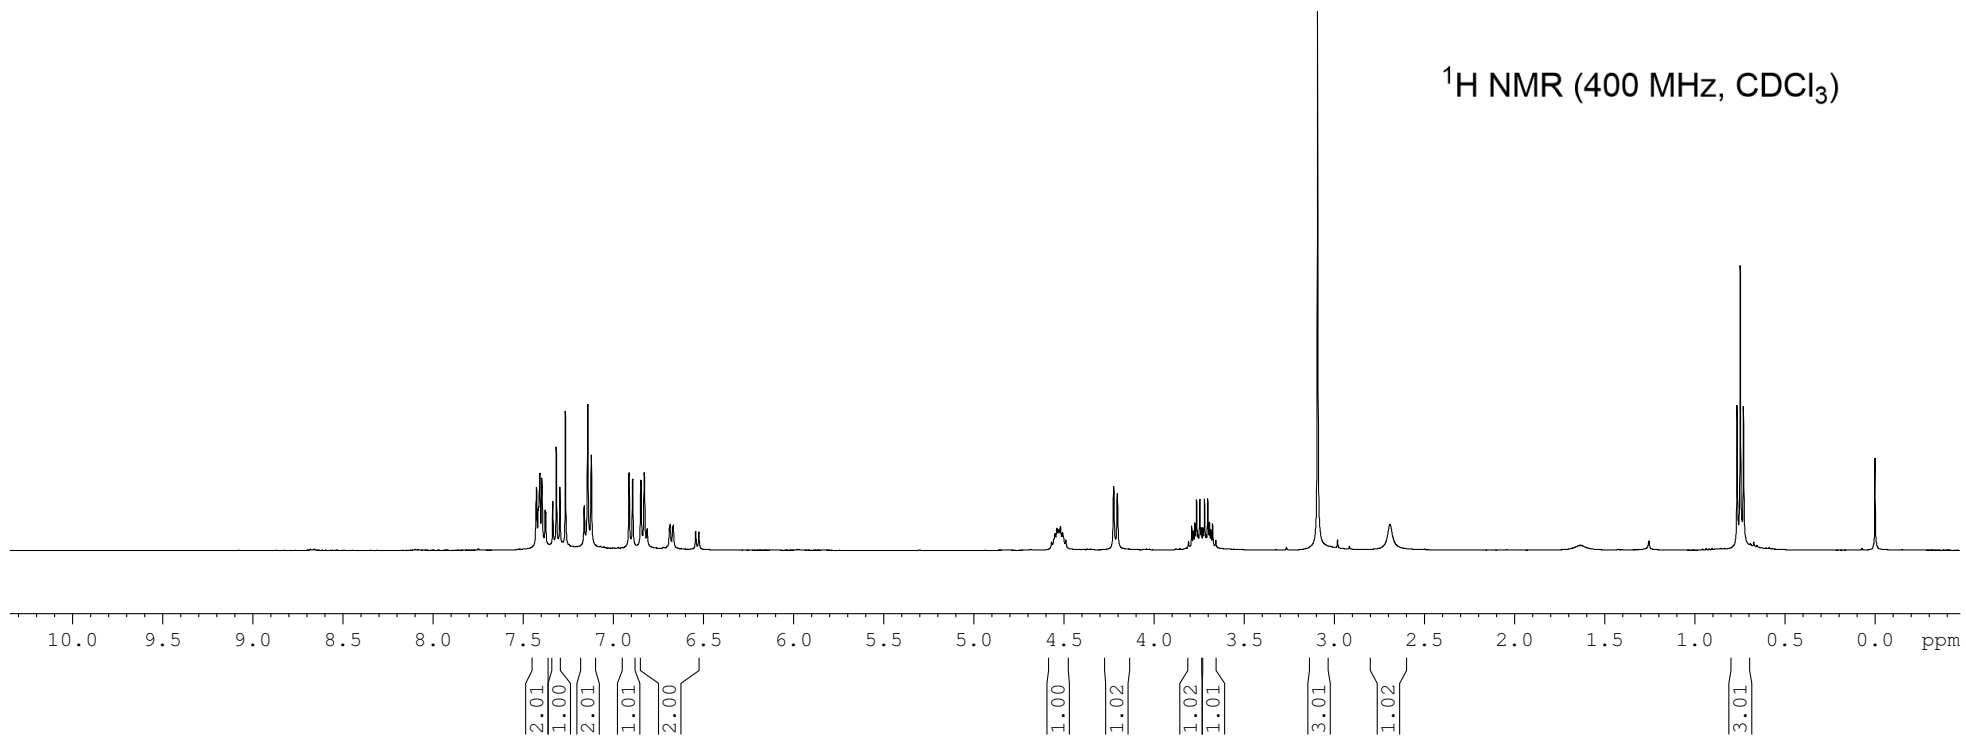

7.427  
7.417  
7.414  
7.408  
7.398  
7.395  
7.378  
7.376  
7.336  
7.316  
7.297  
7.266  
7.161  
7.142  
7.123  
6.912  
6.893  
6.847  
6.828  
6.813  
6.689  
6.685  
6.671  
6.667  
6.543  
6.526  
4.569  
4.549  
4.539  
4.529  
4.519  
4.508  
4.502  
4.490  
4.224  
4.203  
3.809  
3.791  
3.782  
3.773  
3.764  
3.755  
3.746  
3.738  
3.728  
3.720  
3.711  
3.702  
3.693  
3.684  
3.675  
3.657  
3.093  
2.691

0.765  
0.747  
0.729

-0.000

— 200.71

— 171.54  
— 167.36

— 149.50  
— 144.19  
— 135.92  
— 135.00  
— 130.01  
— 127.99  
— 127.56  
— 124.74  
— 124.36  
— 123.28  
— 121.70  
— 119.95  
— 117.56  
— 117.51  
— 115.12  
— 108.08

— 86.98

— 63.04  
— 61.01  
— 59.71  
— 59.47  
— 59.43  
— 59.19  
— 49.56  
— 49.48

— 26.68

— 13.58

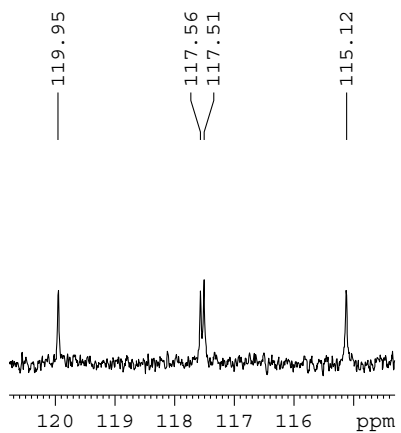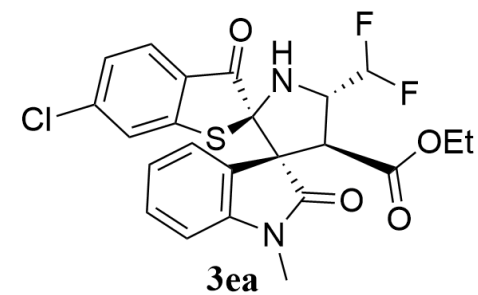

$^{13}\text{C}$  { $^1\text{H}$ } NMR (101 MHz,  $\text{CDCl}_3$ )

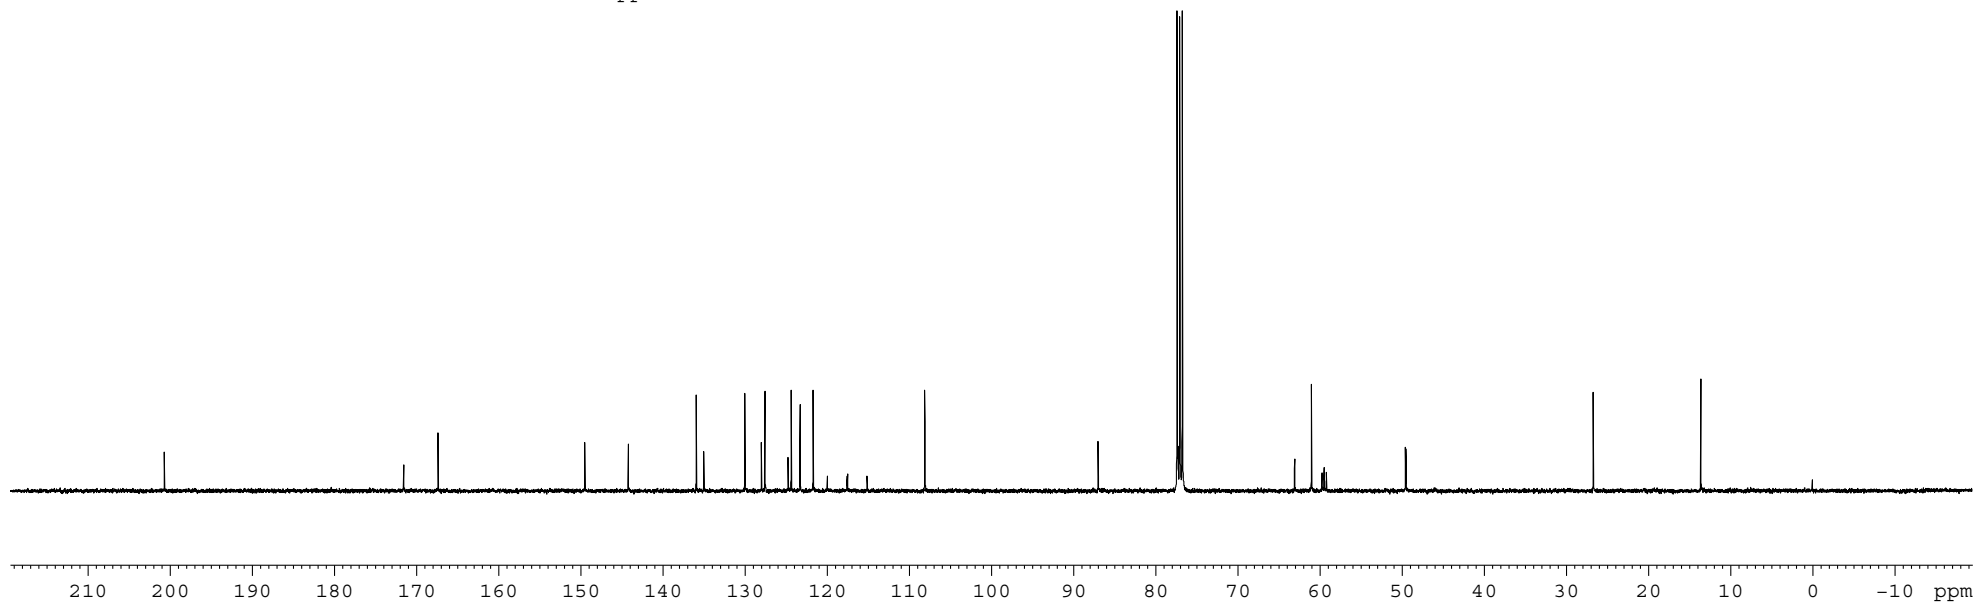

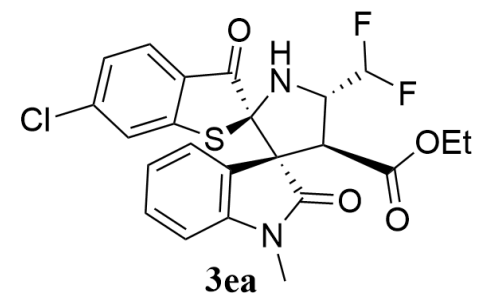

$^{19}\text{F}$  NMR (376 MHz,  $\text{CDCl}_3$ )

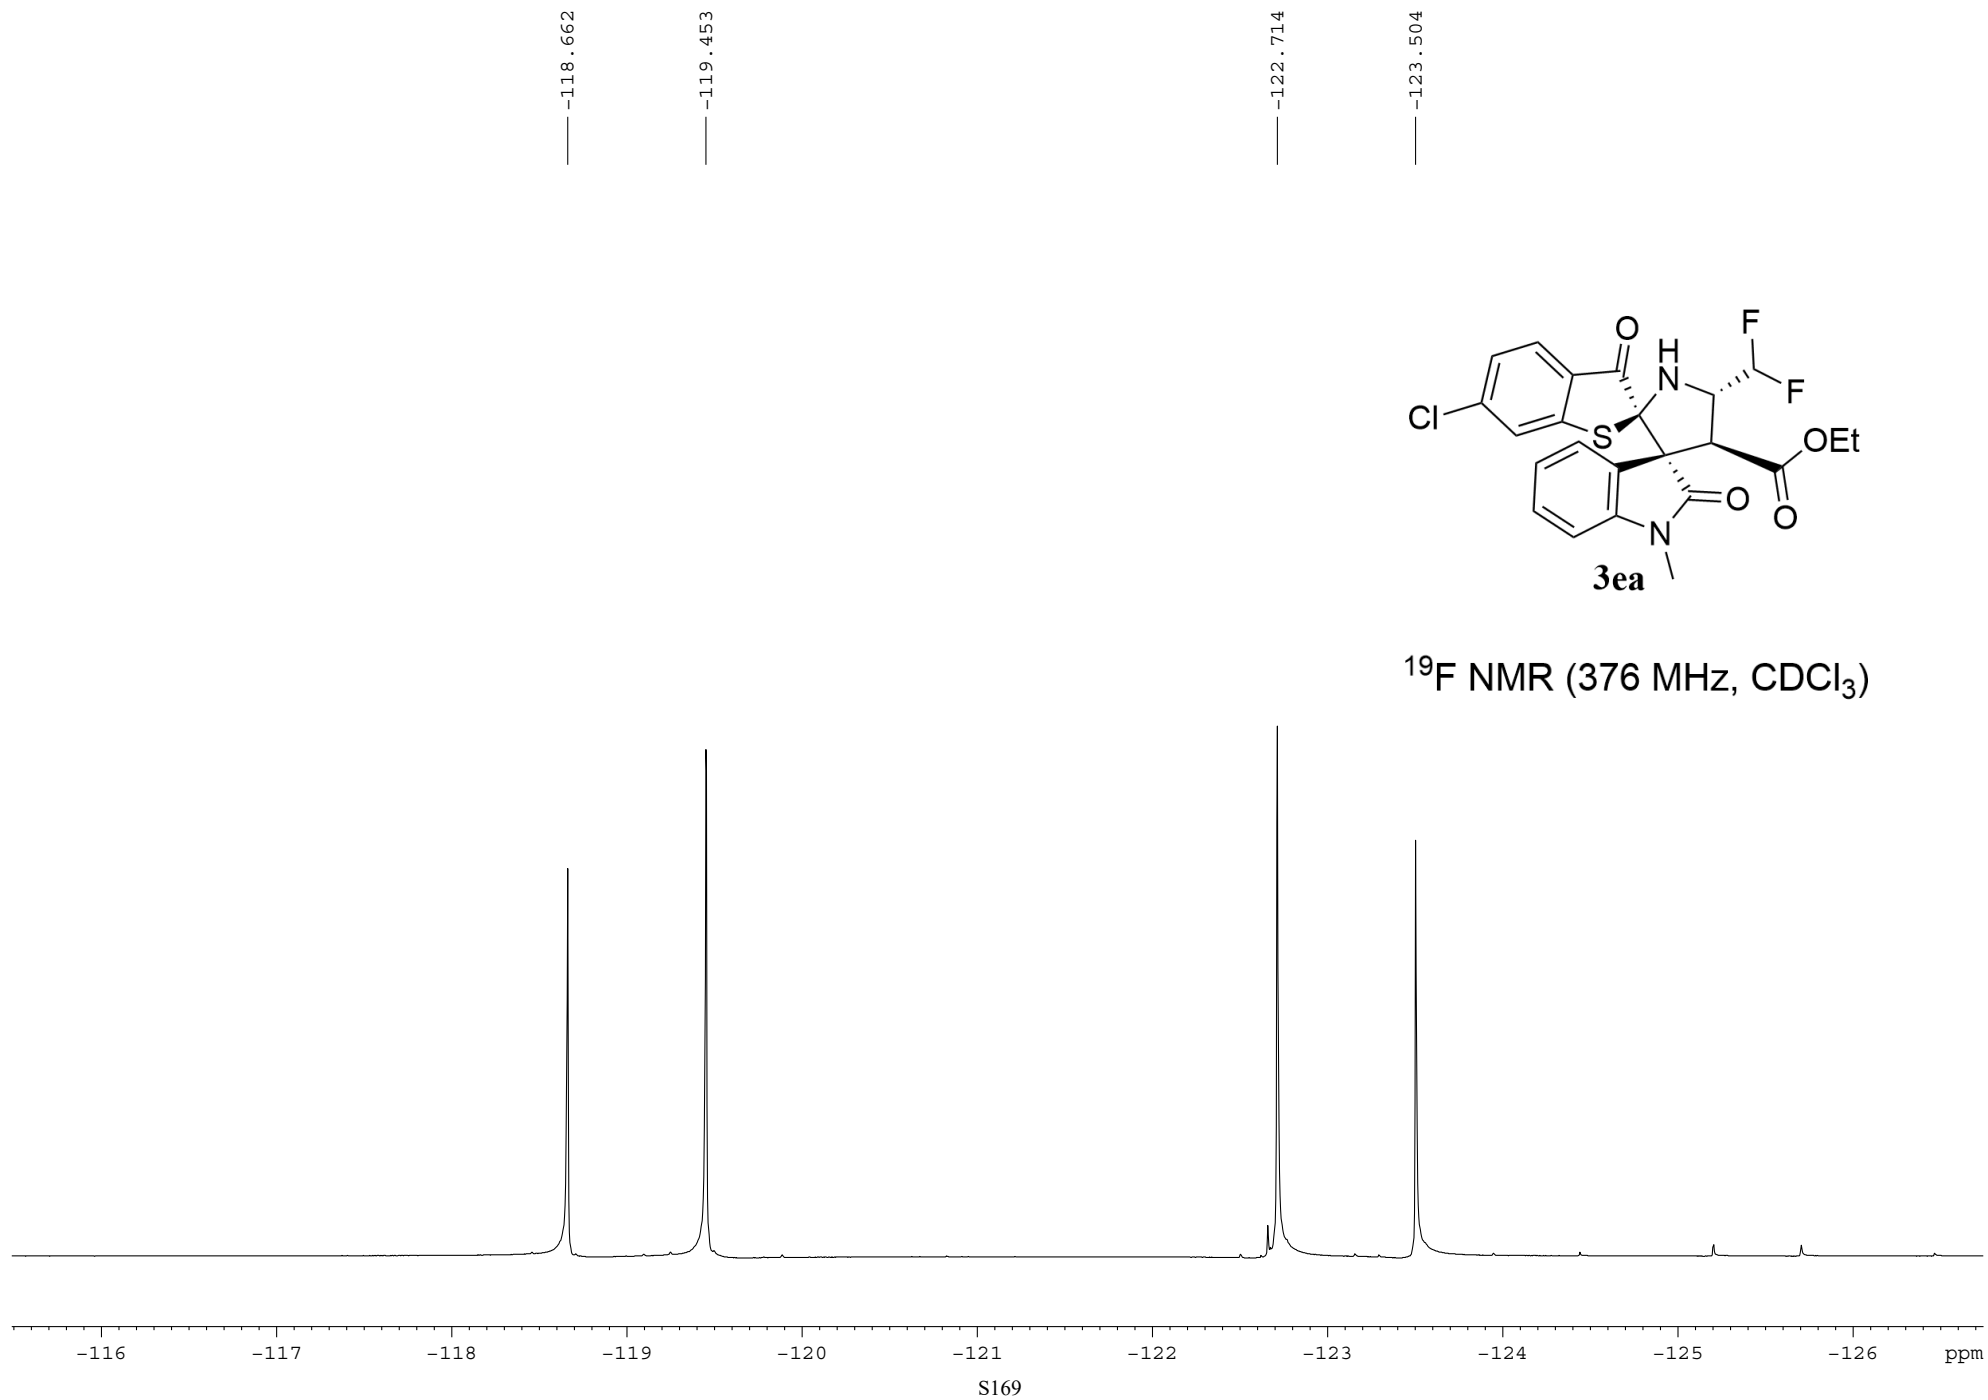

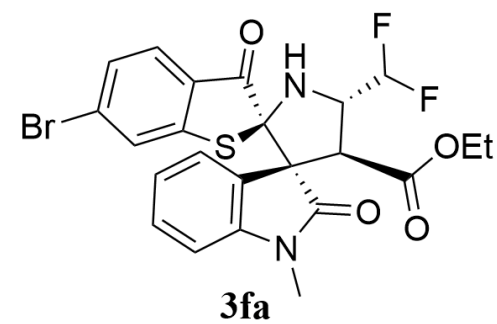

<sup>1</sup>H NMR (400 MHz, CDCl<sub>3</sub>)

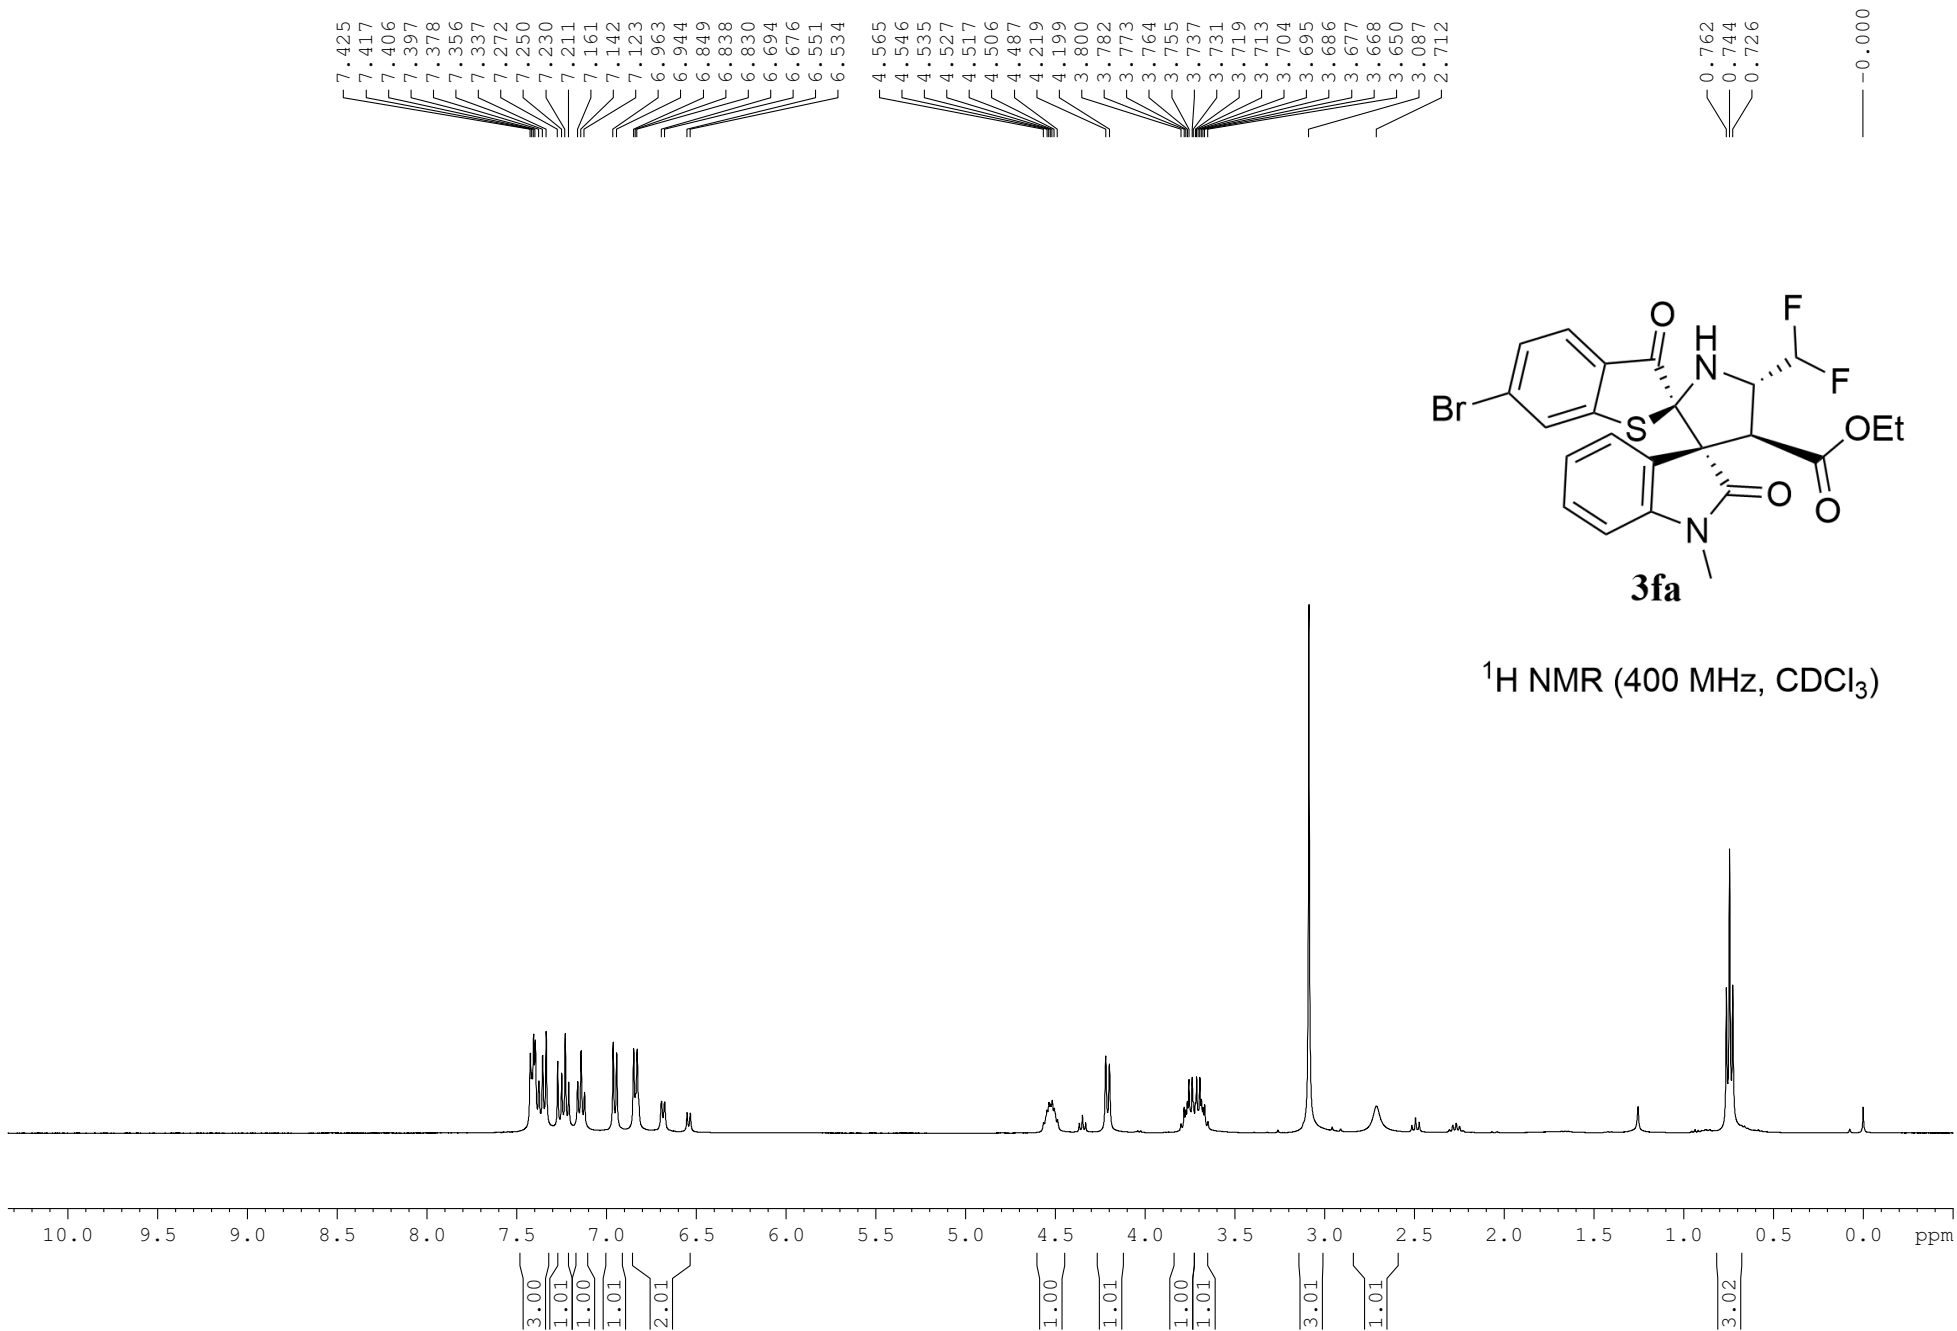

— 201.03  
 — 171.53  
 — 167.36  
 — 149.99  
 — 144.19  
 135.95  
 130.94  
 130.02  
 127.97  
 125.92  
 124.35  
 123.28  
 122.98  
 122.31  
 119.95  
 117.57  
 117.51  
 115.12  
 108.10

— 87.13

68.52  
 63.06  
 61.00  
 59.70  
 59.46  
 59.41  
 59.17  
 49.59  
 49.51

— 26.69

— 13.58

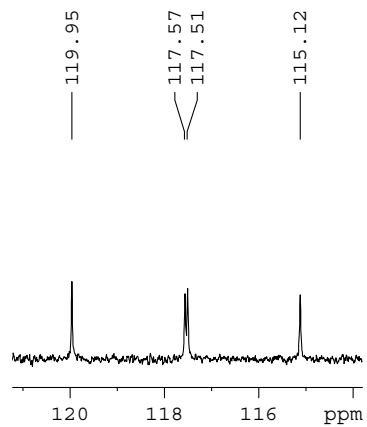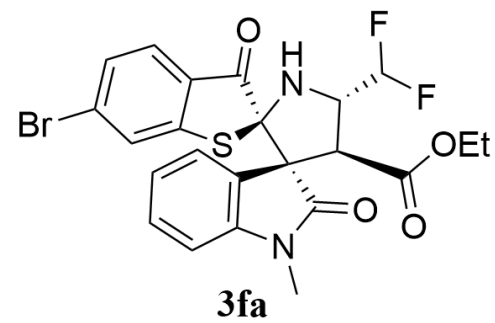

$^{13}\text{C} \{^1\text{H}\}$  NMR (101 MHz,  $\text{CDCl}_3$ )

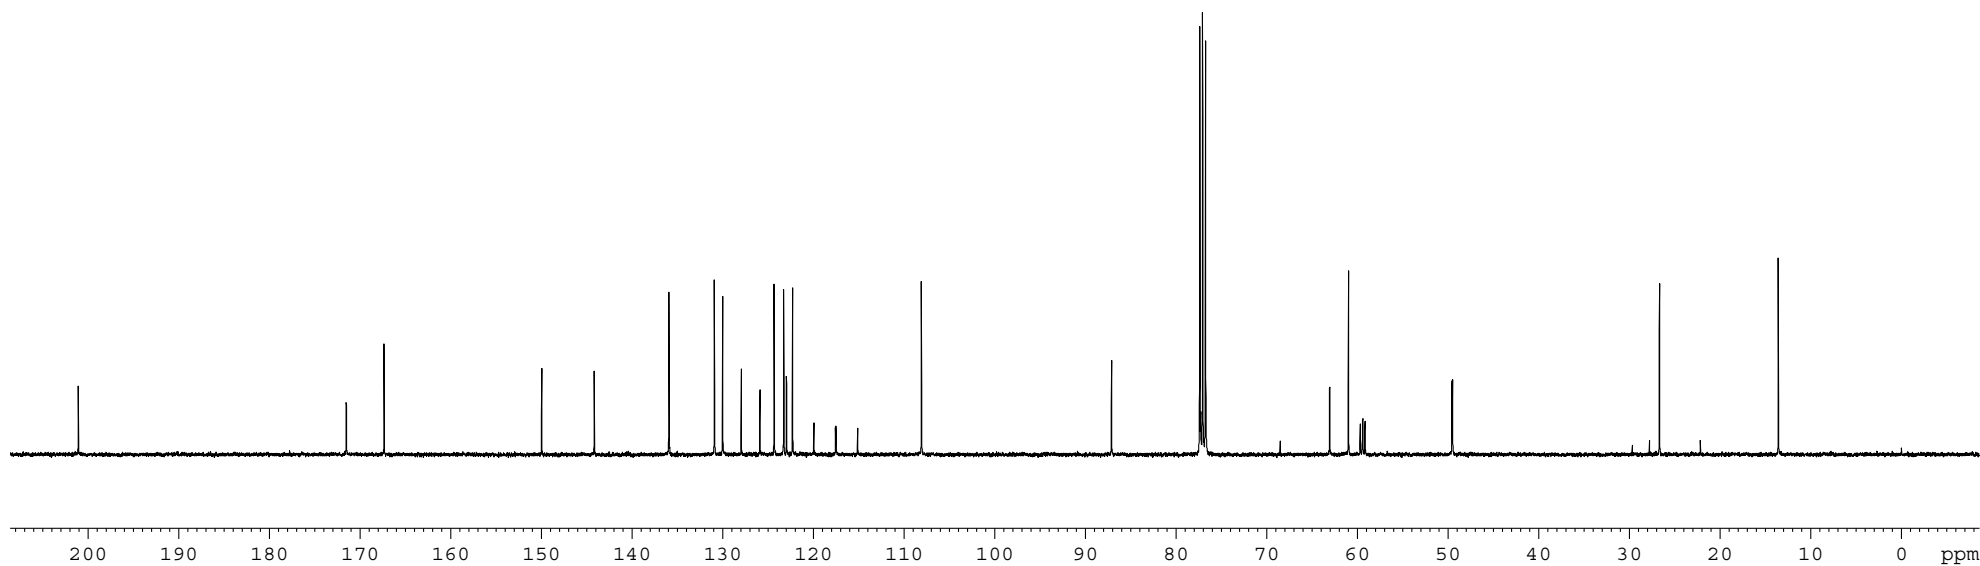

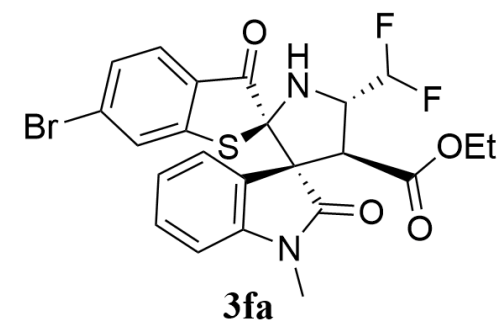

$^{19}\text{F}$  NMR (376 MHz,  $\text{CDCl}_3$ )

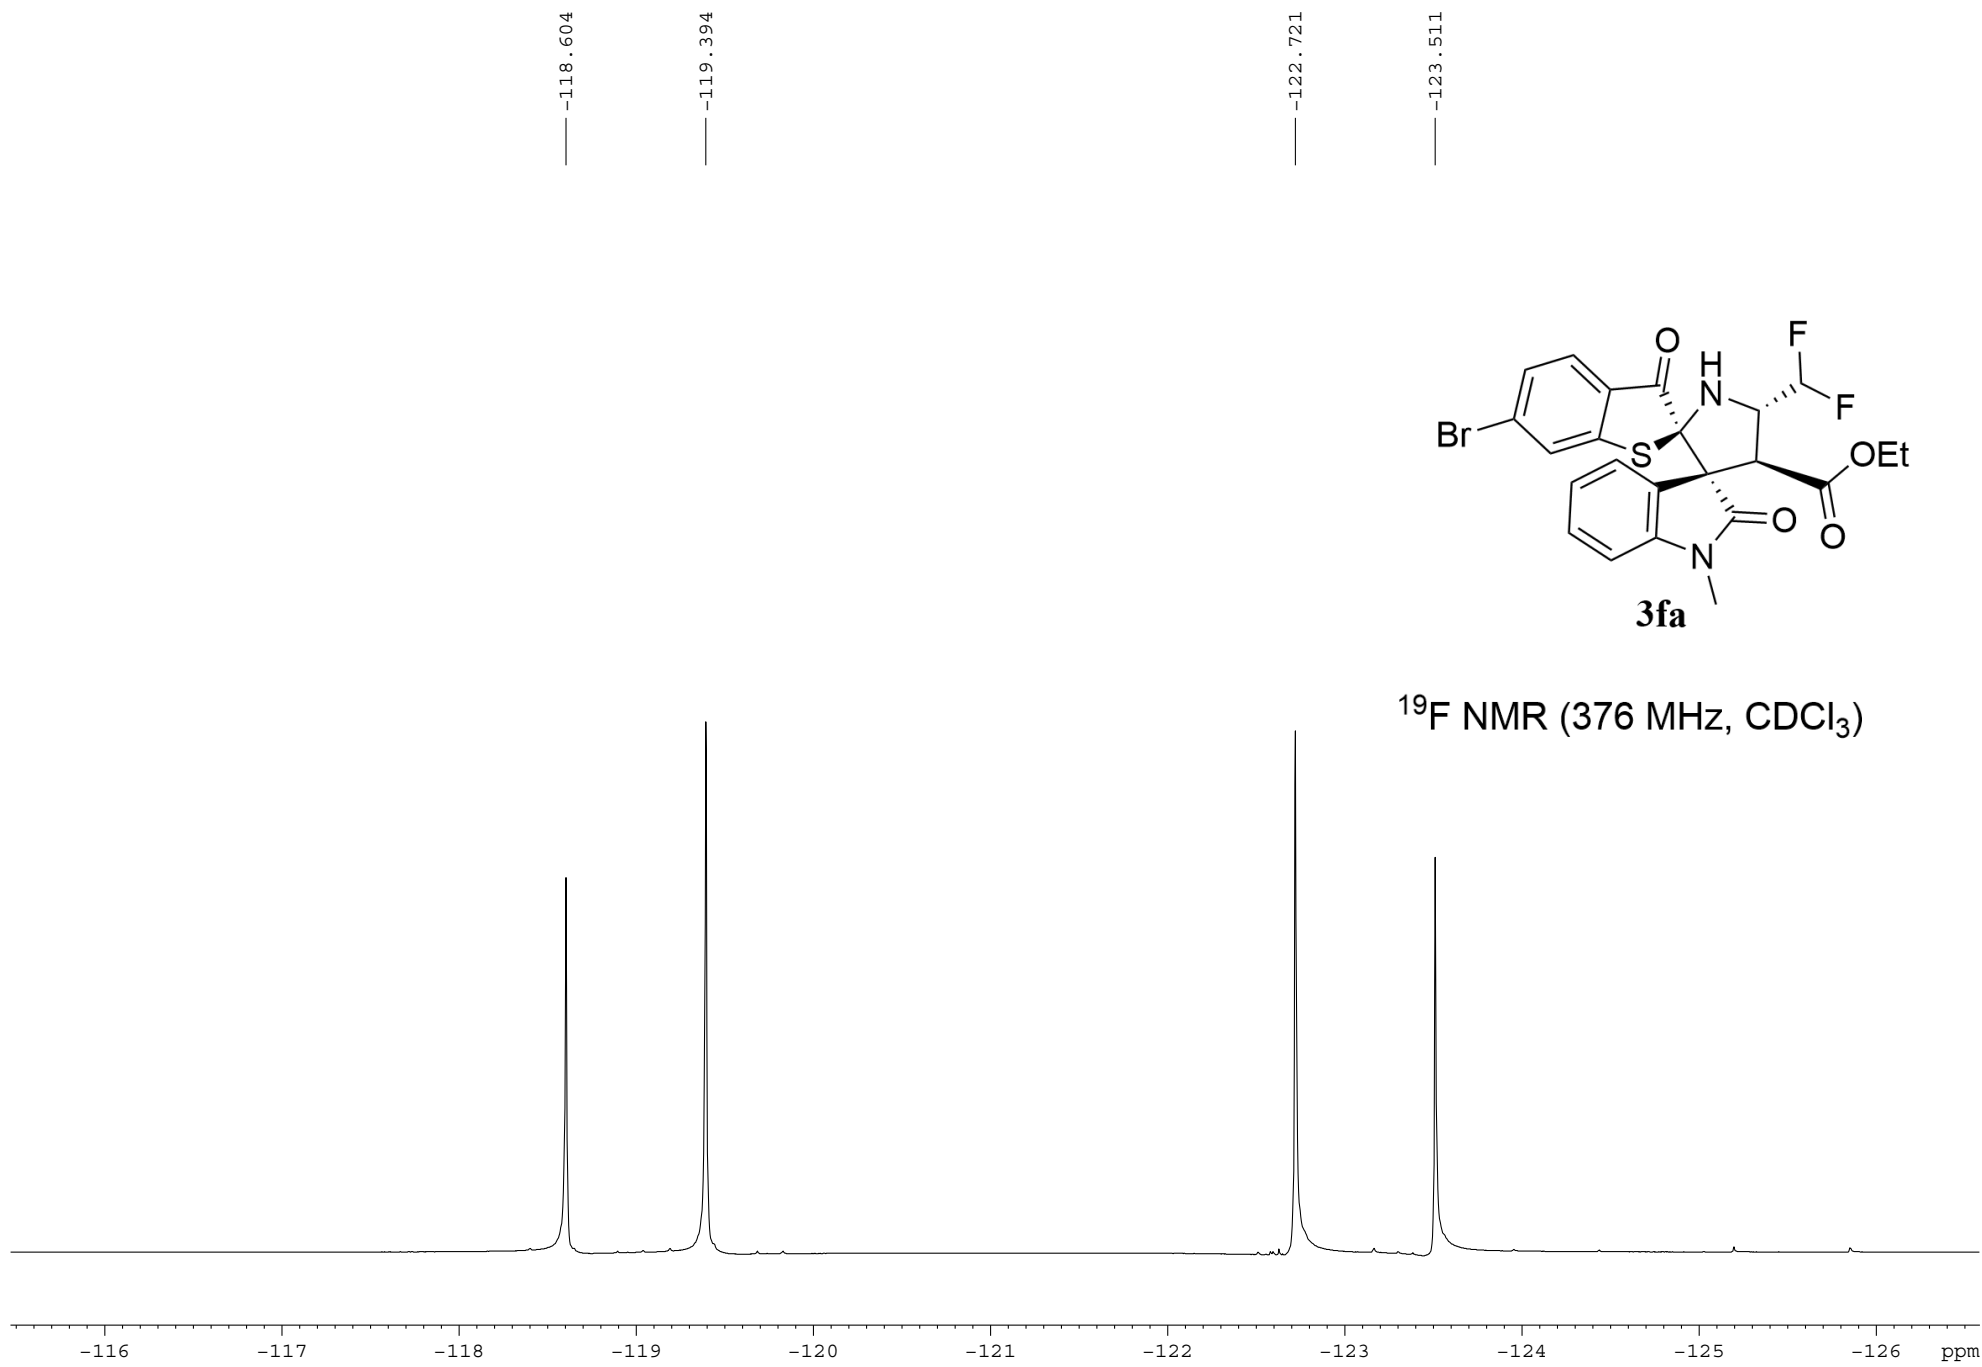



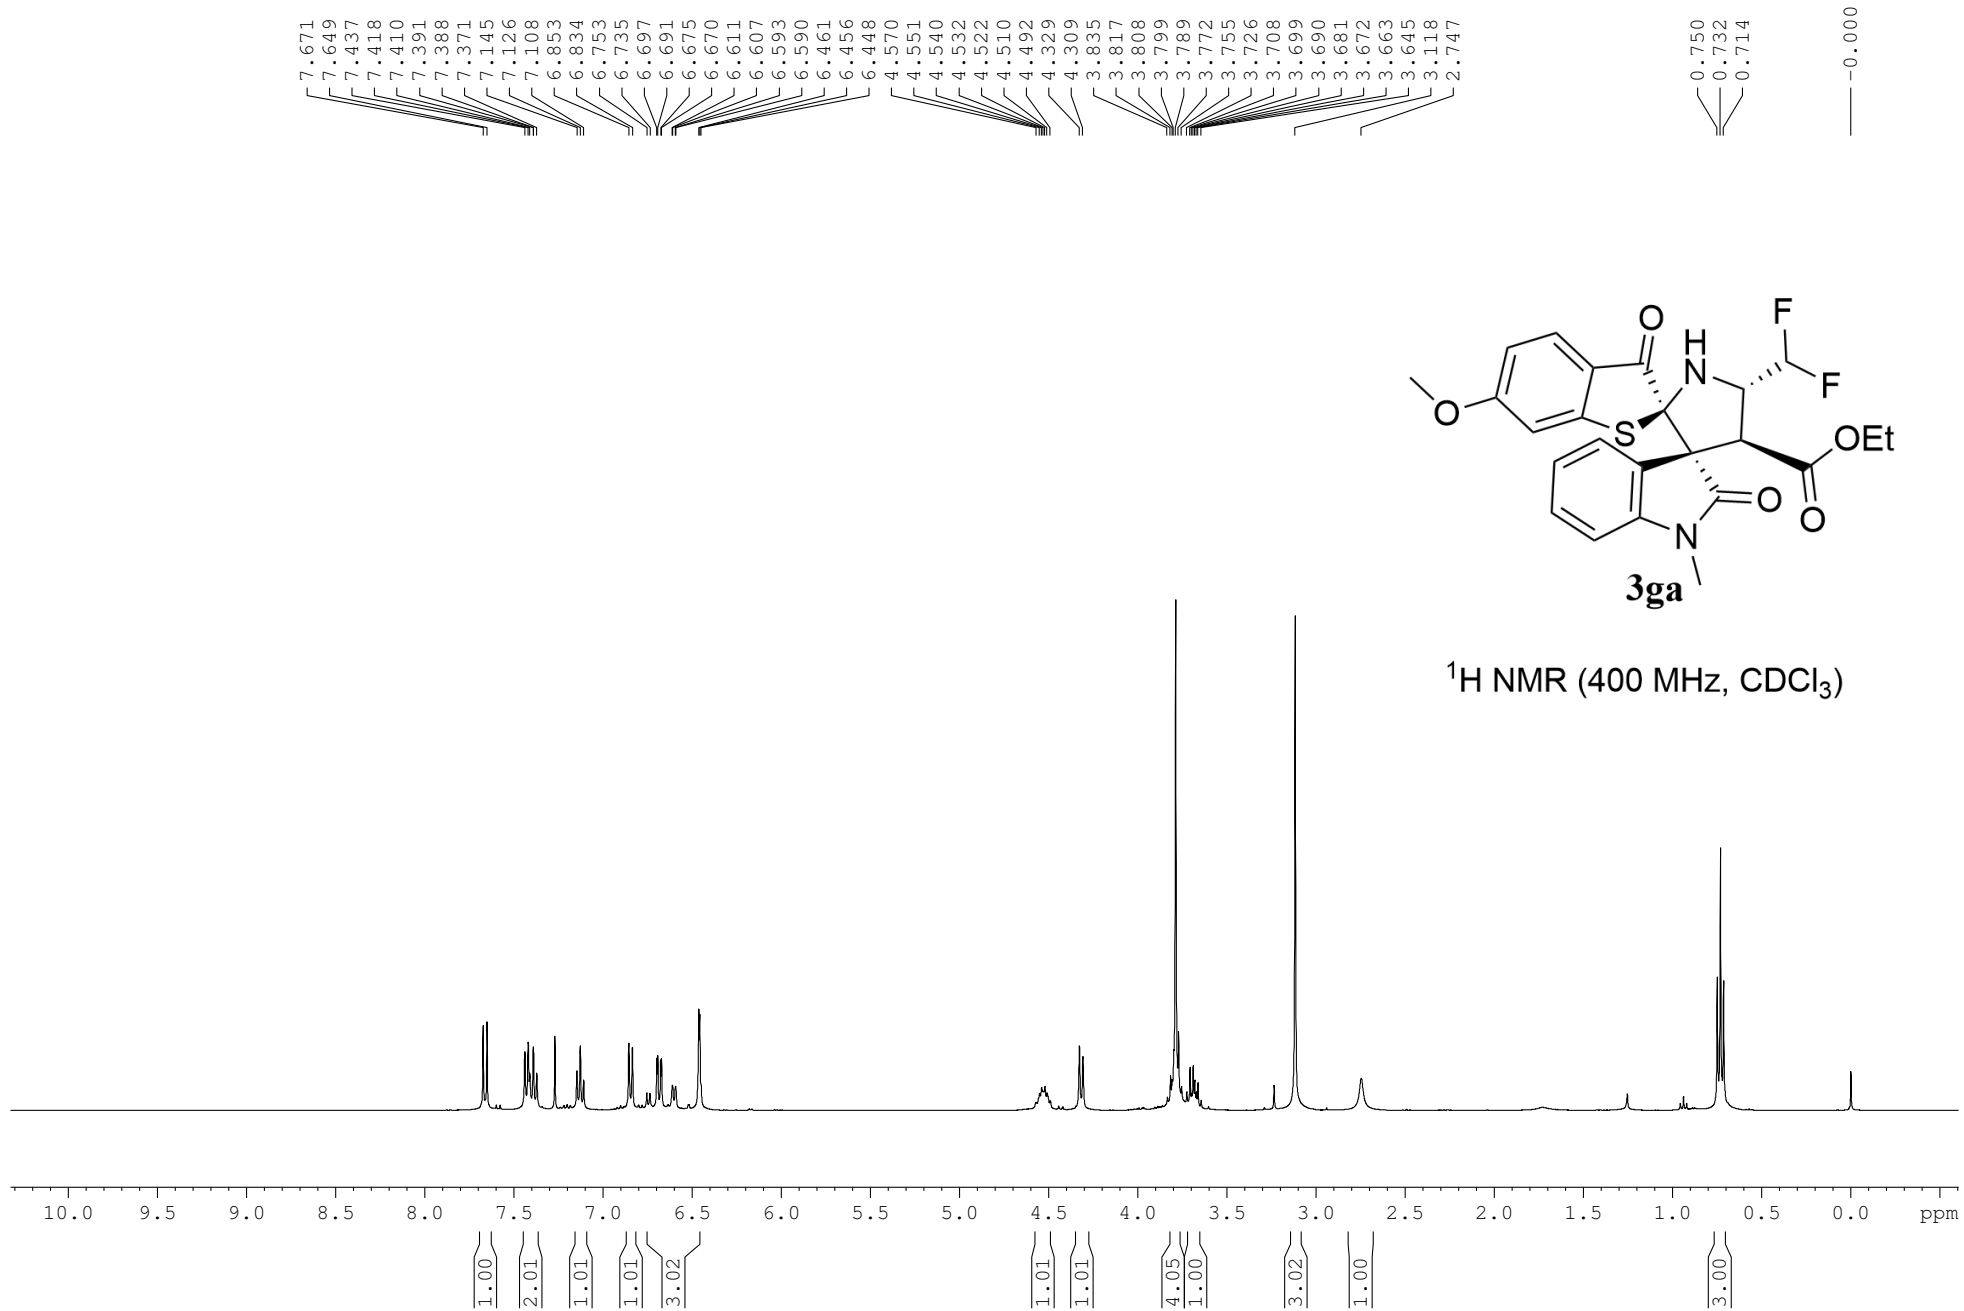

— 199.94

— 171.44  
— 167.69  
— 166.47

— 150.79  
— 144.09

— 129.86  
— 129.02  
— 128.53  
— 124.22  
— 123.09  
— 121.88  
— 119.91  
— 117.52  
— 117.46  
— 115.08  
— 113.27  
— 107.98  
— 107.08

— 87.26

— 62.32  
— 60.92  
— 59.89  
— 59.65  
— 59.61  
— 59.37  
— 55.76  
— 49.78  
— 49.70

— 26.69

— 13.56

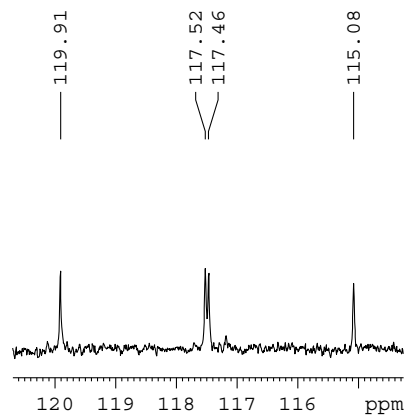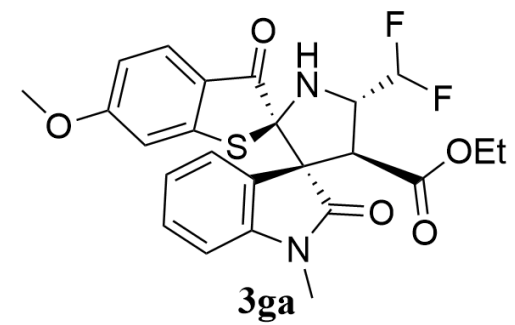

$^{13}\text{C}$  { $^1\text{H}$ } NMR (101 MHz,  $\text{CDCl}_3$ )

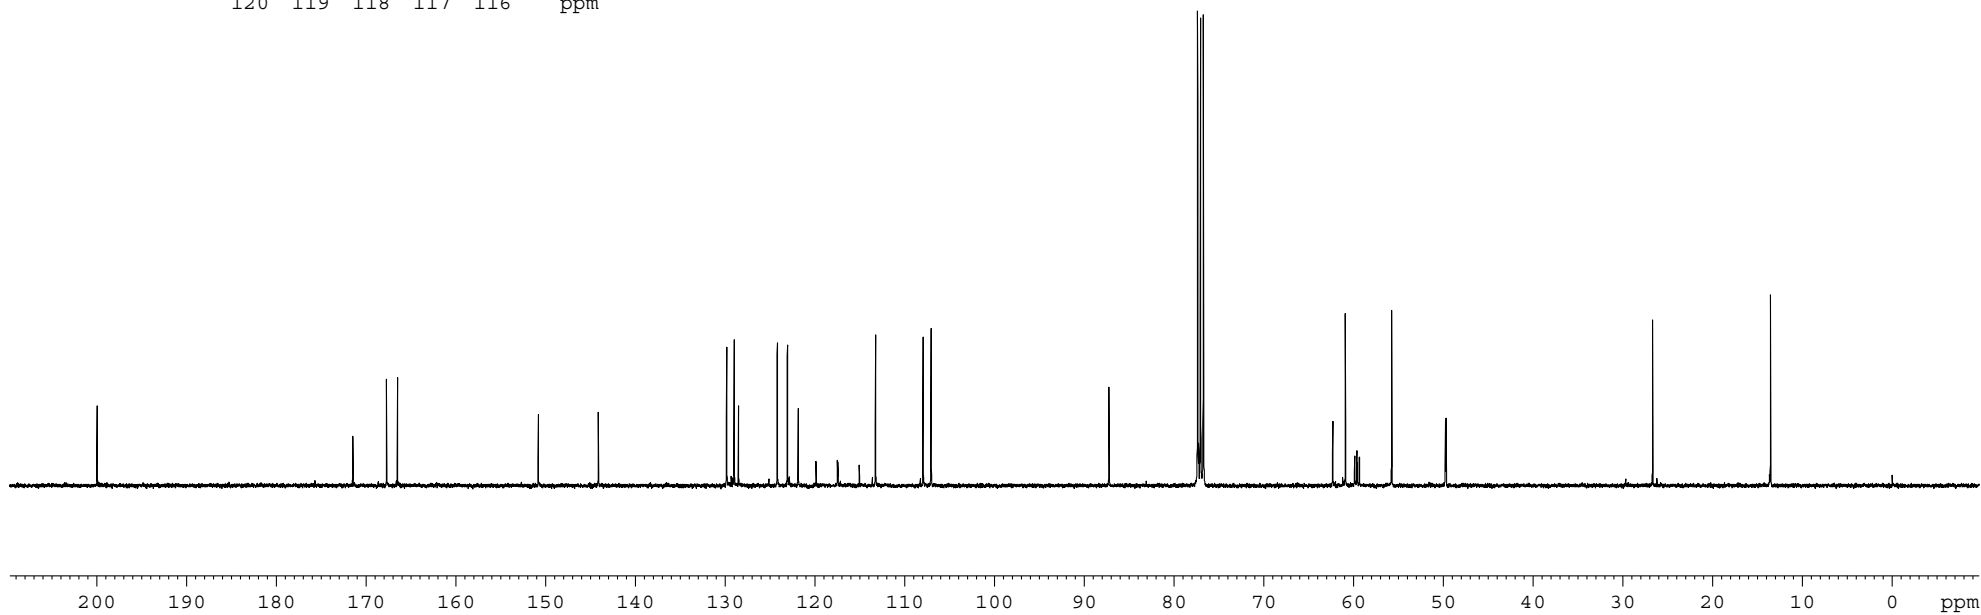

— -118.976

— -119.763

— -122.671

— -123.458

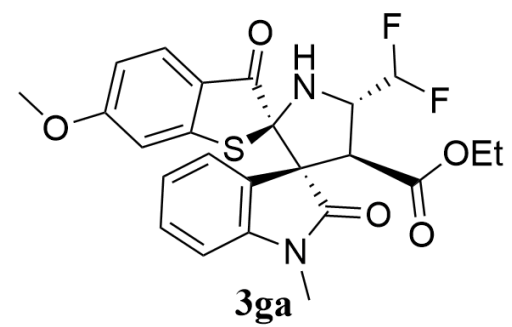

$^{19}\text{F}$  NMR (376 MHz,  $\text{CDCl}_3$ )

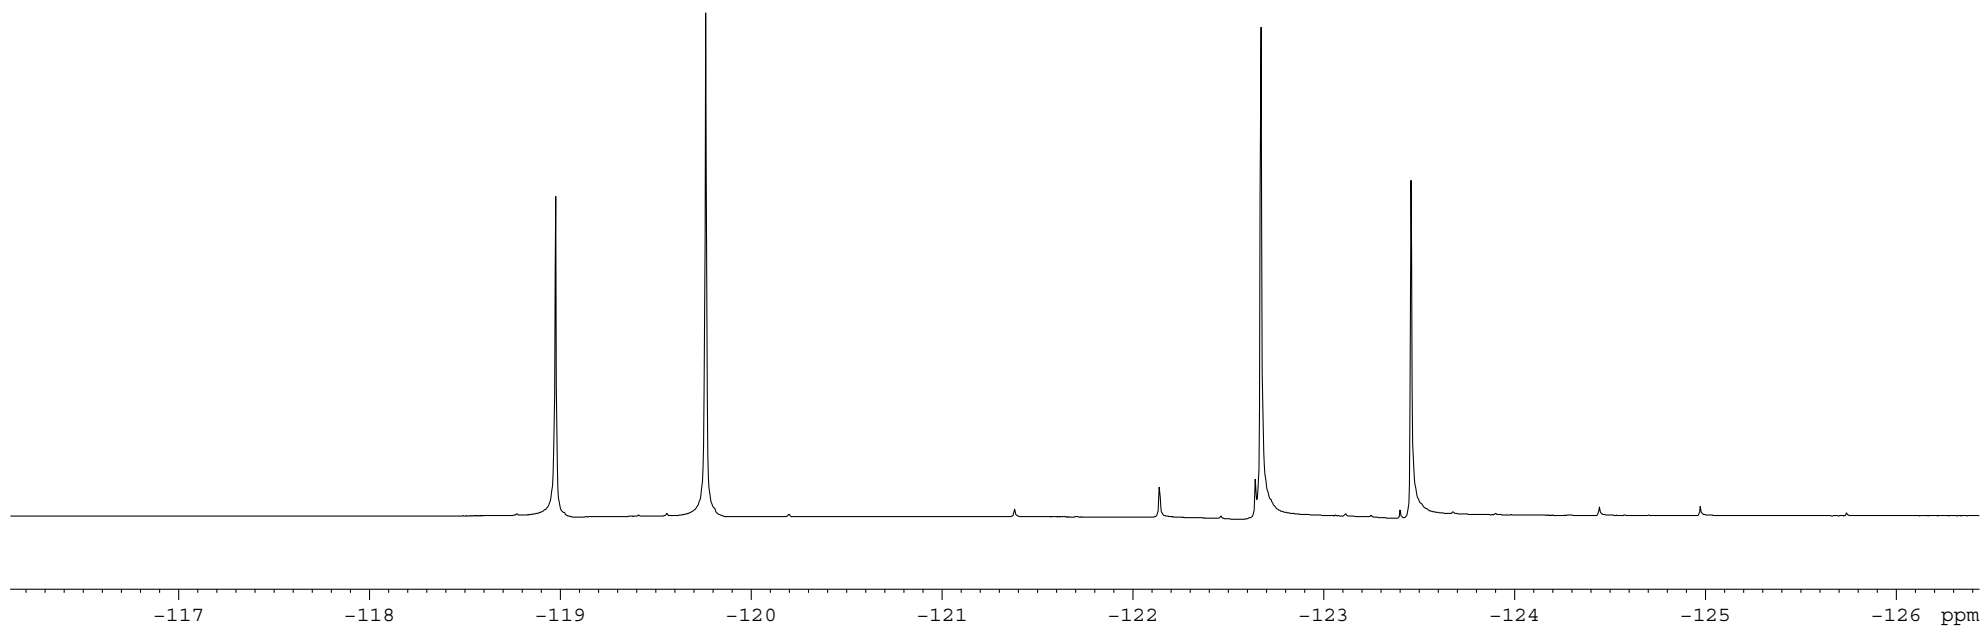

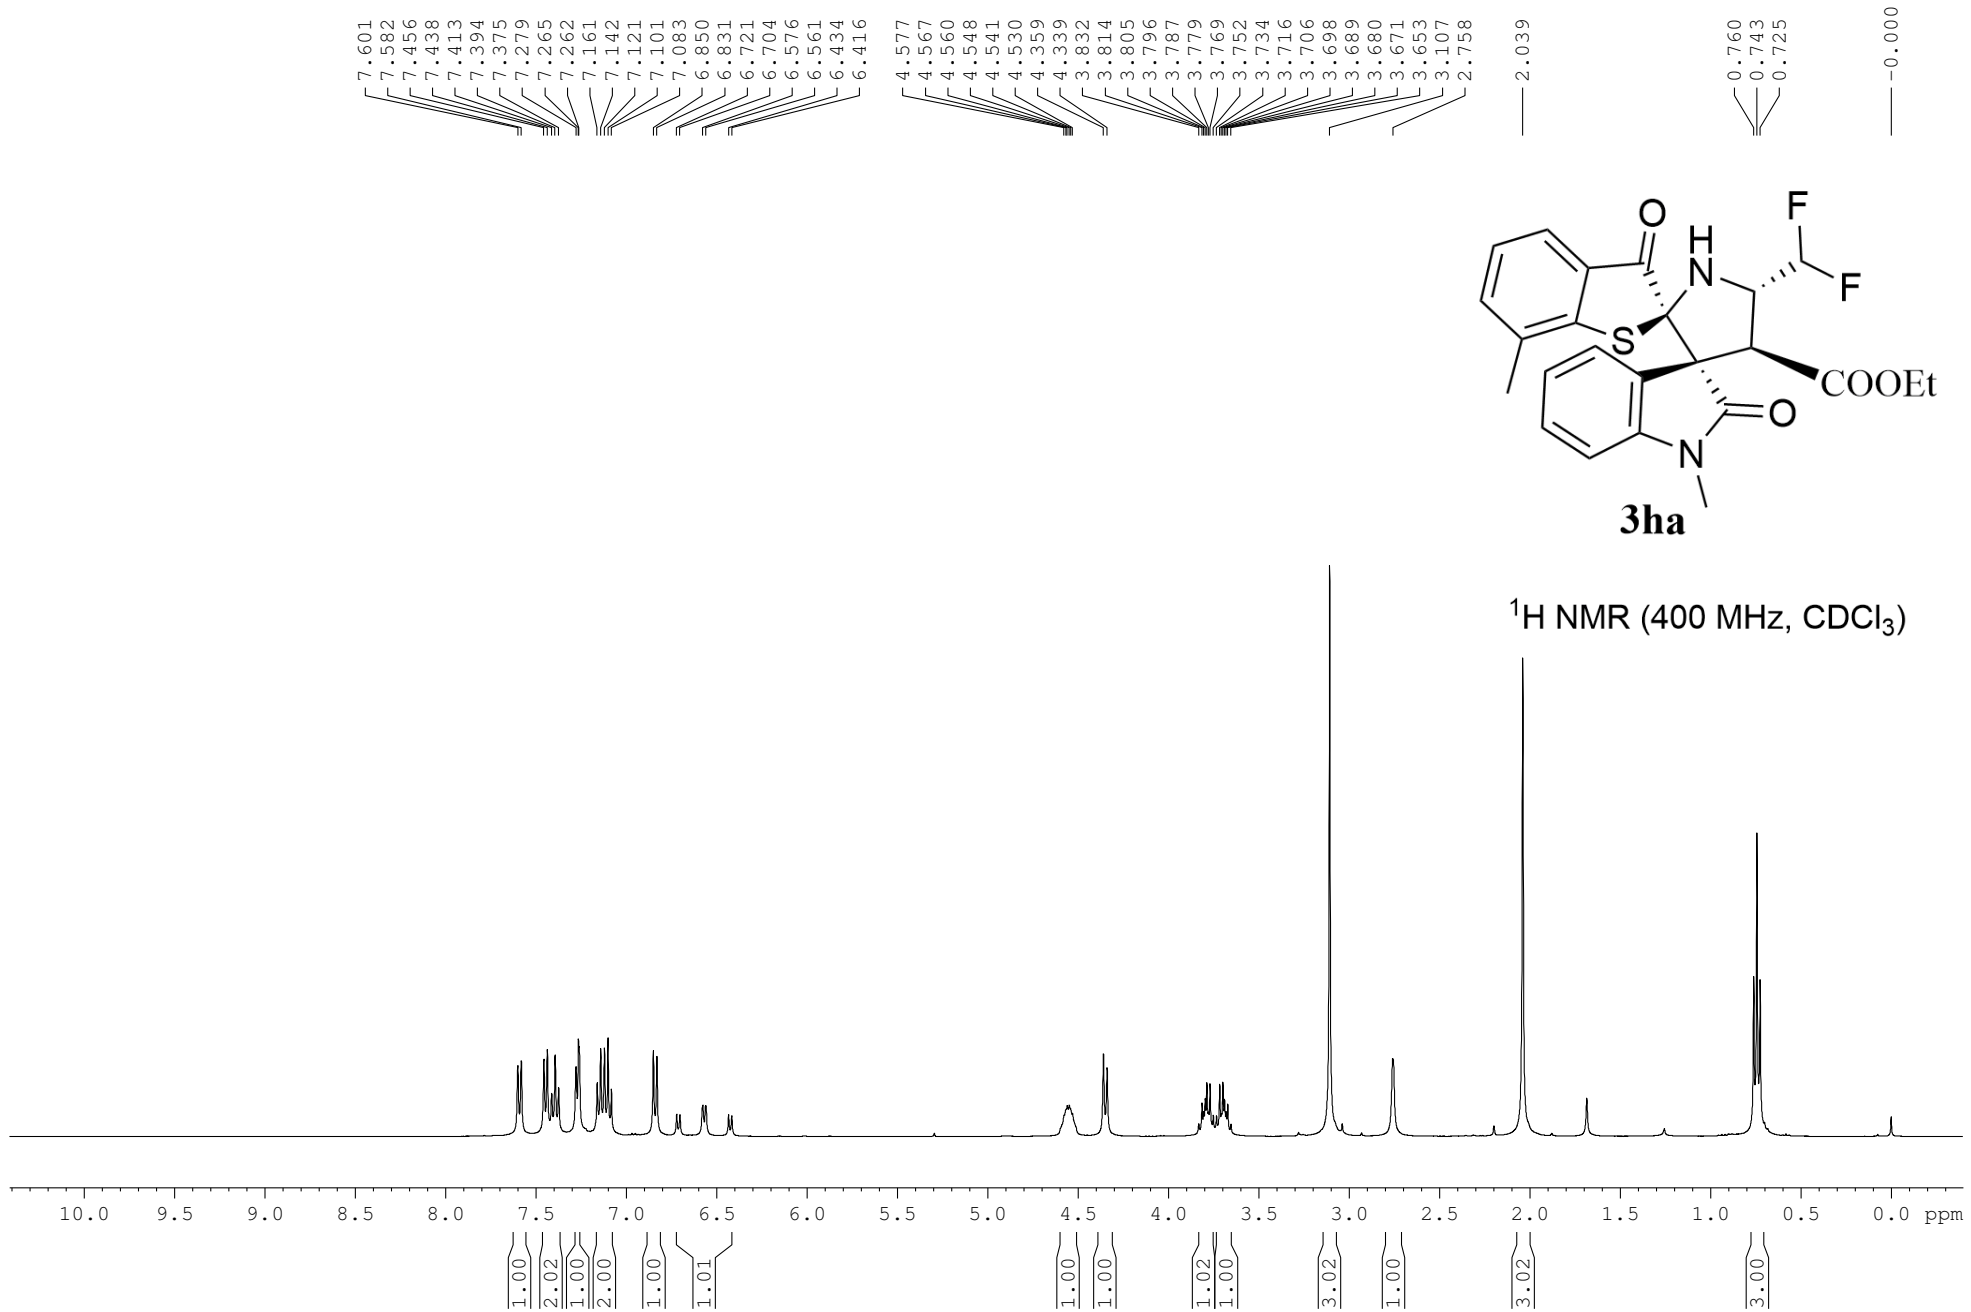

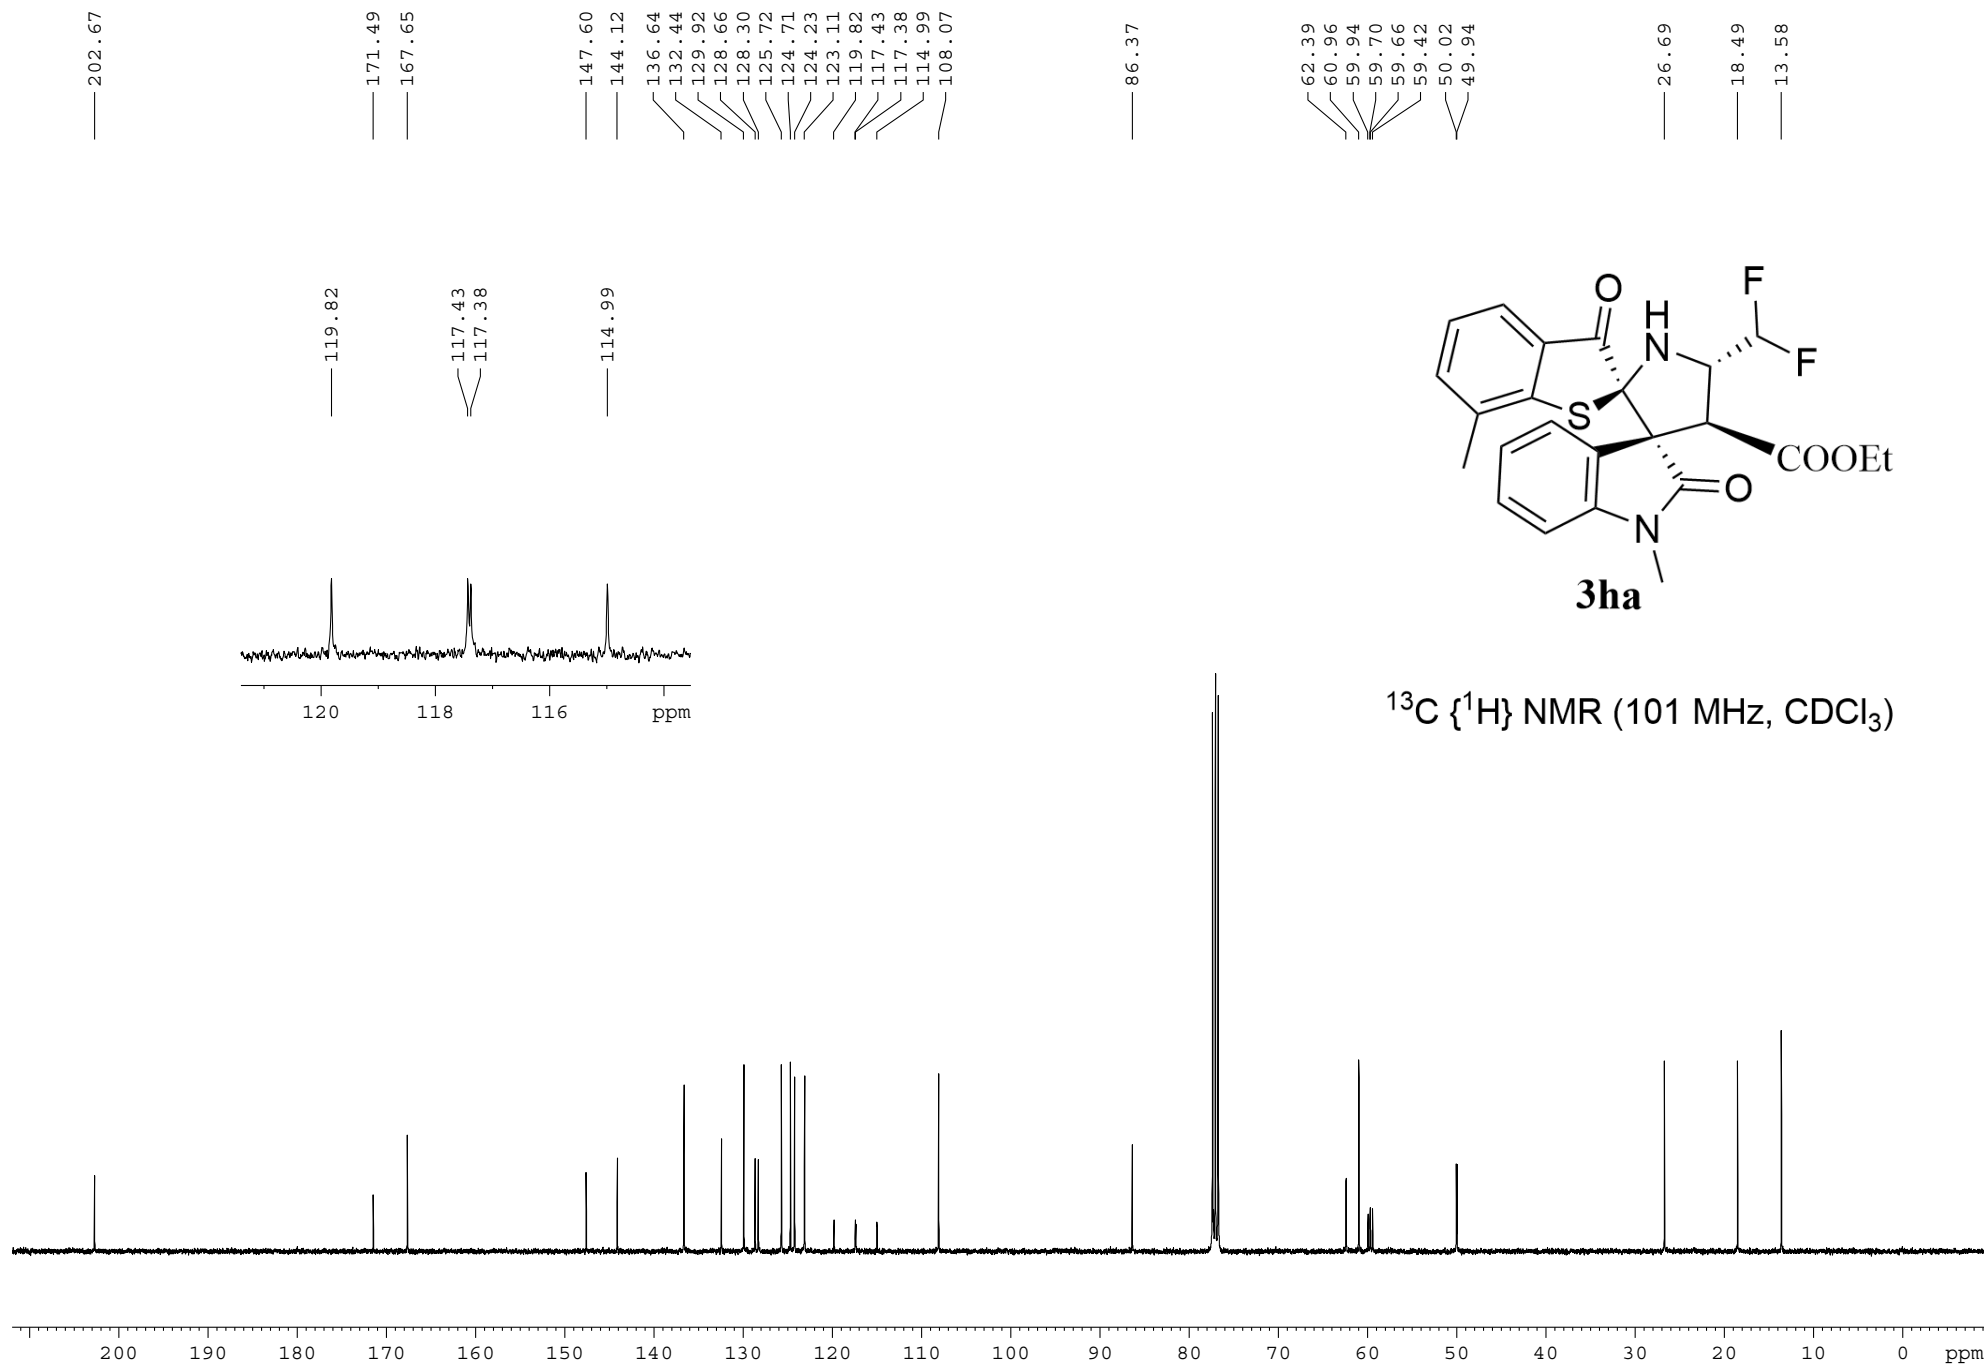

— -118.969

— -119.755

— -122.596

— -123.383

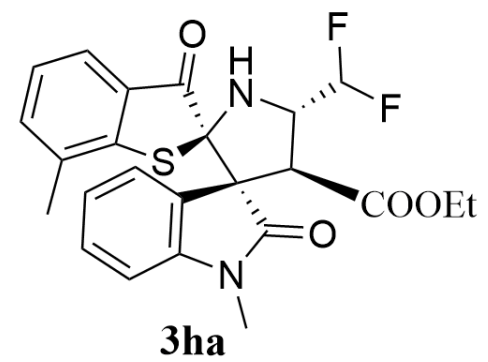

<sup>19</sup>F NMR (376 MHz, CDCl<sub>3</sub>)

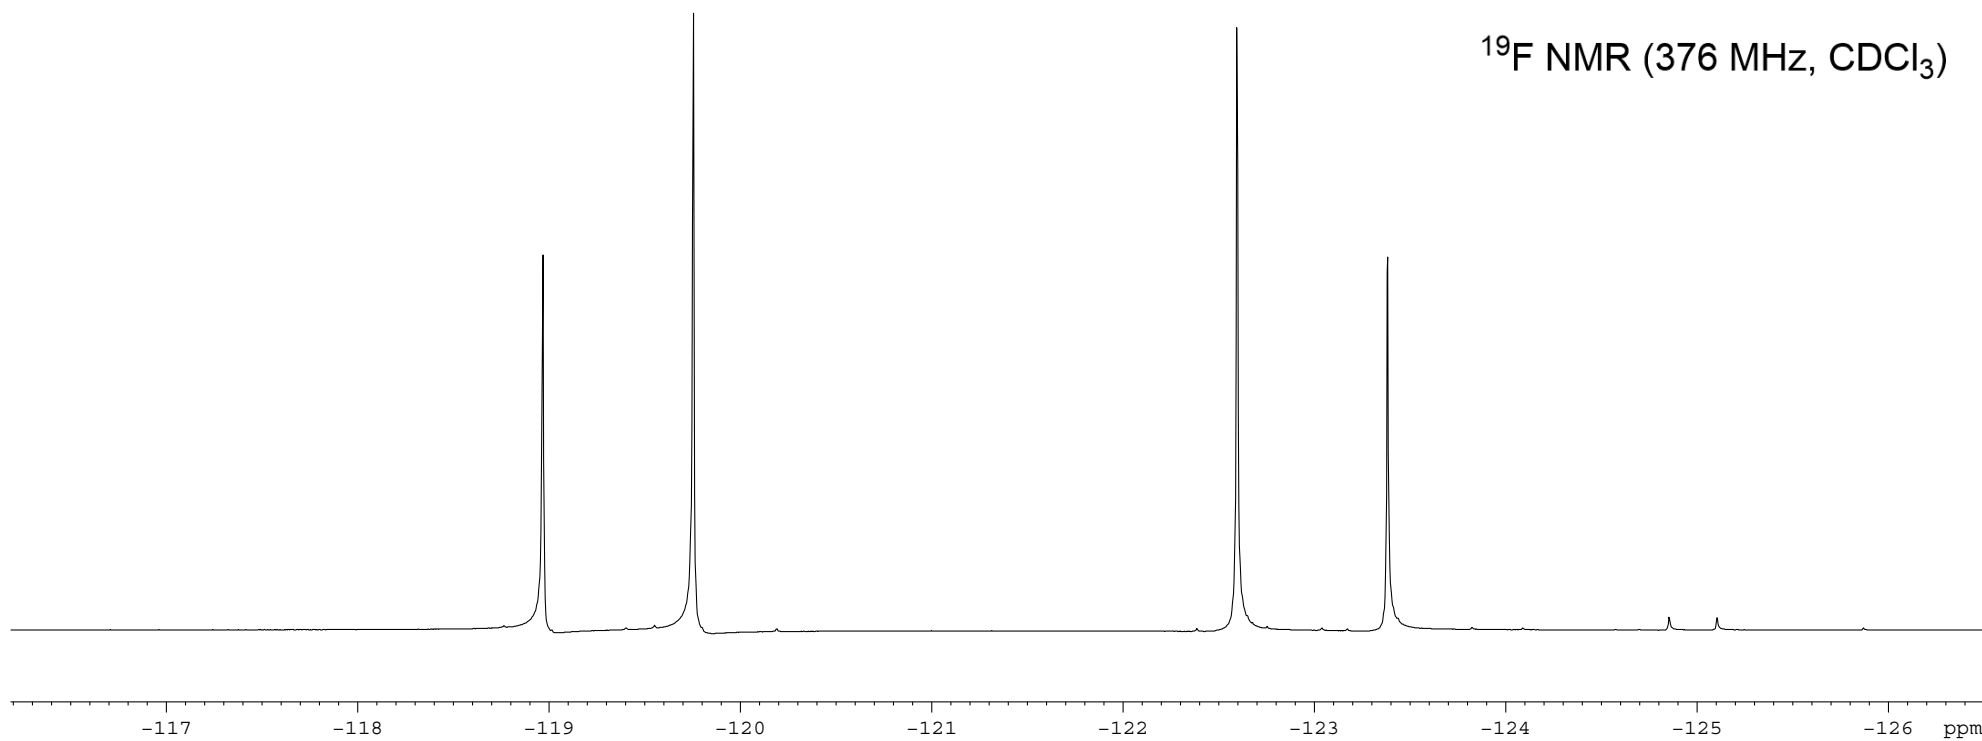

7.858  
7.764  
7.744  
7.698  
7.696  
7.678  
7.660  
7.657  
7.500  
7.497  
7.487  
7.480  
7.469  
7.462  
7.460  
7.417  
7.414  
7.397  
7.395  
7.378  
7.375  
7.169  
7.150  
7.133  
7.131  
7.069  
7.048  
6.899  
6.882  
6.840  
6.821  
6.757  
6.754  
6.739  
6.736  
6.612  
6.594  
4.627  
4.615  
4.608  
4.598  
4.589  
4.578  
4.567  
4.561  
4.549  
4.415  
4.394  
3.821  
3.804  
3.795  
3.786  
3.777  
3.768  
3.759  
3.745  
3.741  
3.727  
3.718  
3.710  
3.700  
3.692  
3.683  
3.665  
3.044

0.766  
0.748  
0.730

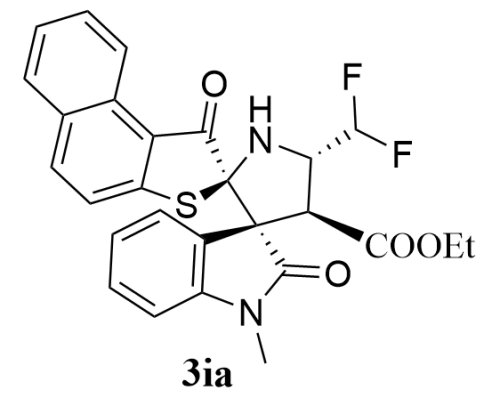

<sup>1</sup>H NMR (400 MHz, CDCl<sub>3</sub>)

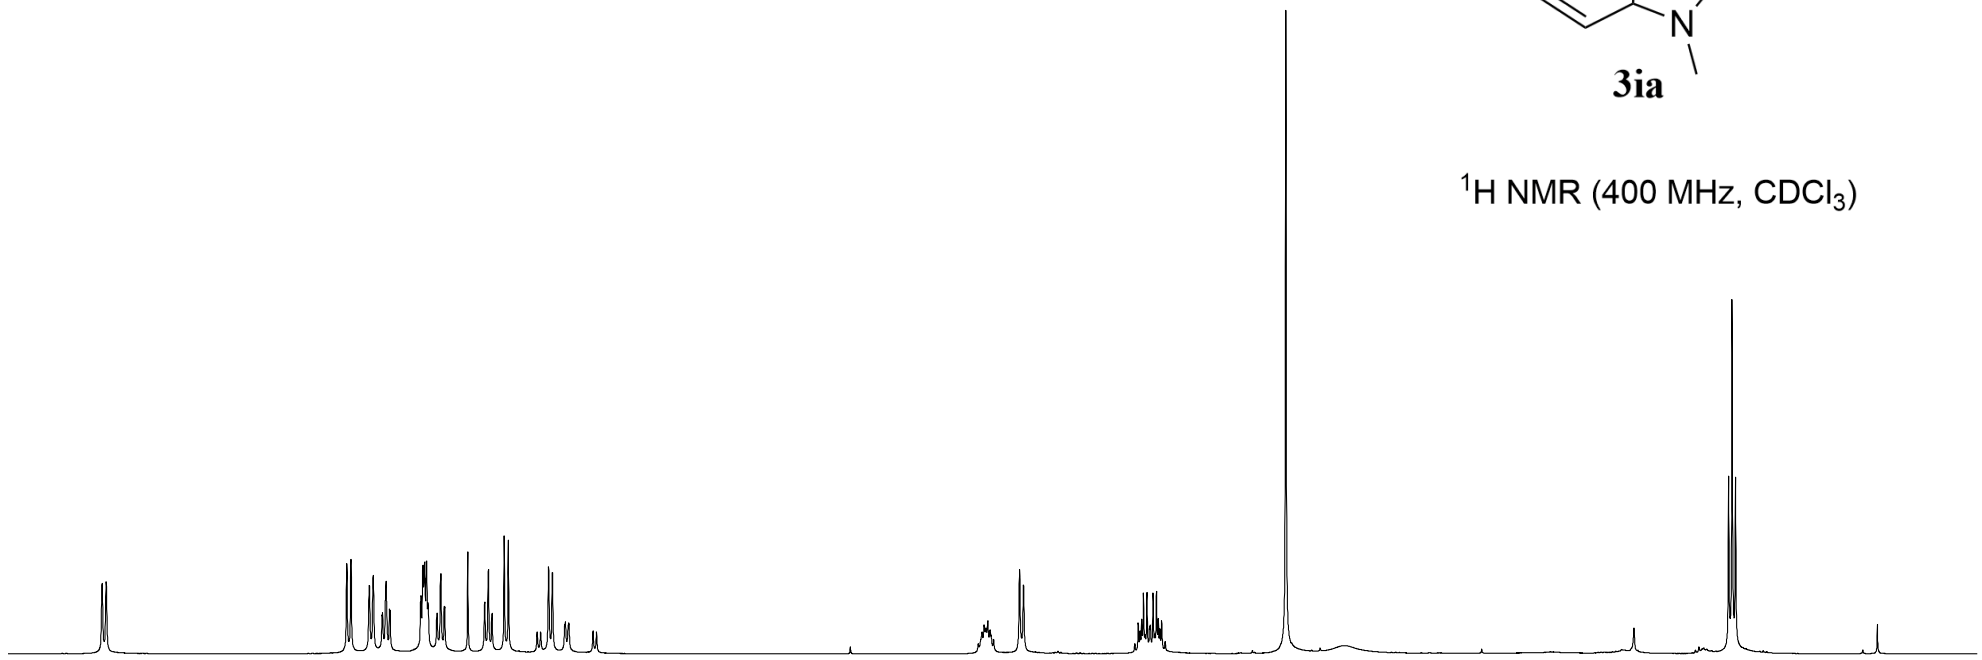

9.5  
9.0  
8.5  
8.0  
7.5  
7.0  
6.5  
6.0  
5.5  
5.0  
4.5  
4.0  
3.5  
3.0  
2.5  
2.0  
1.5  
1.0  
0.5  
0.0 ppm

1.00  
1.01  
1.01  
1.02  
2.01  
1.00  
1.00  
1.01  
2.01  
1.01  
1.01  
2.02  
3.01  
1.02  
3.01

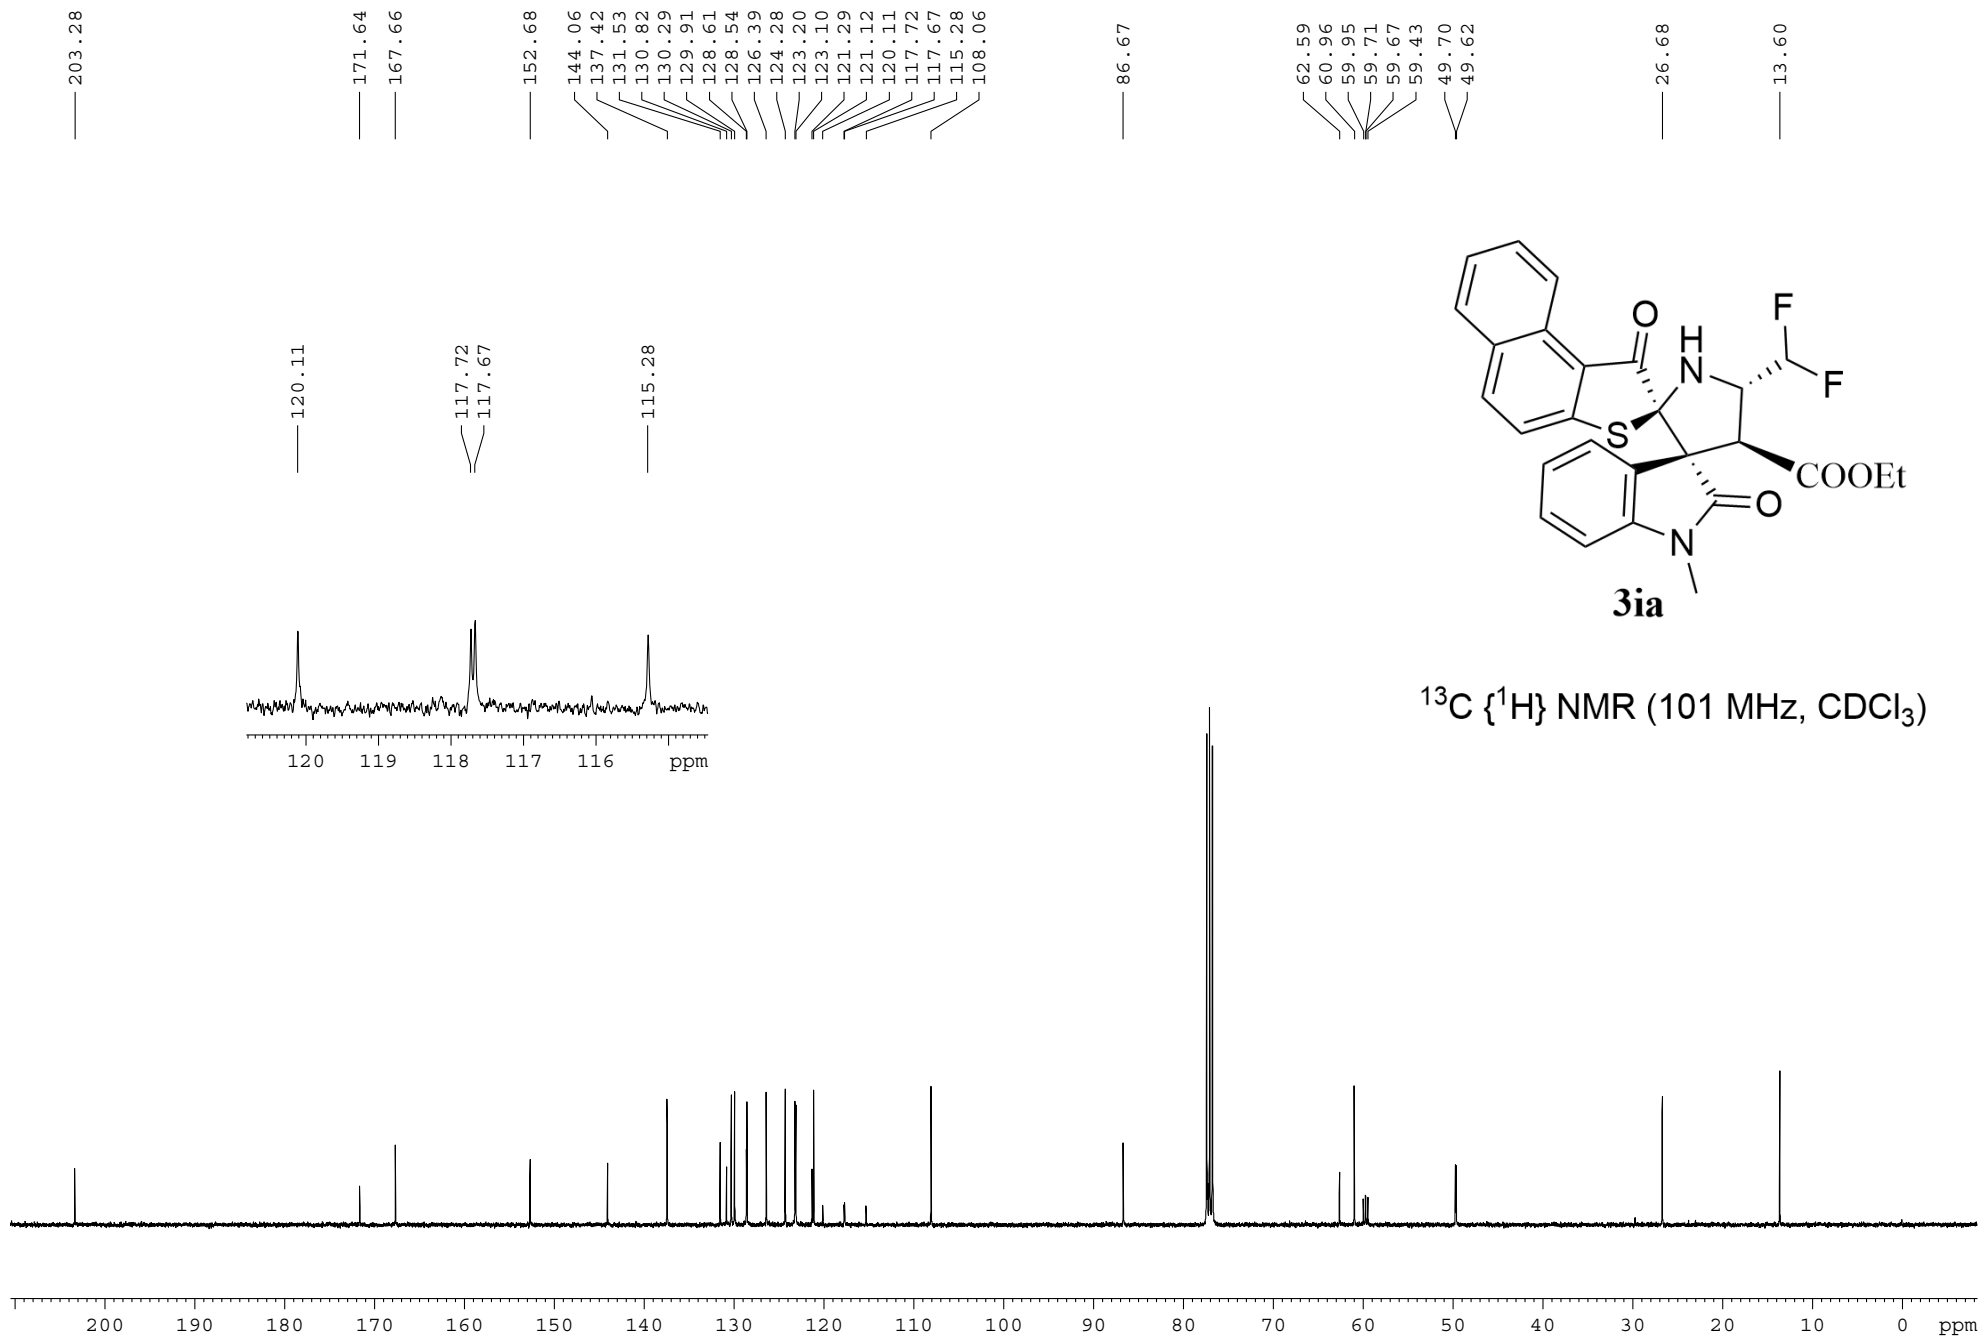



— -118.824

— -119.612

— -122.382

— -123.170

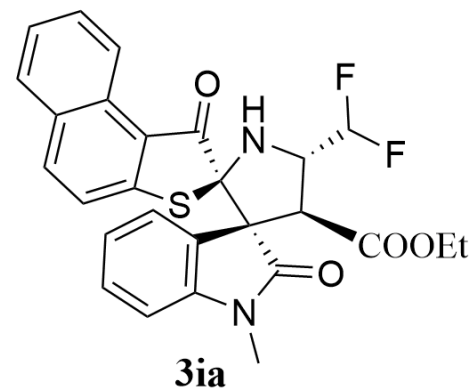

<sup>19</sup>F NMR (376 MHz, CDCl<sub>3</sub>)

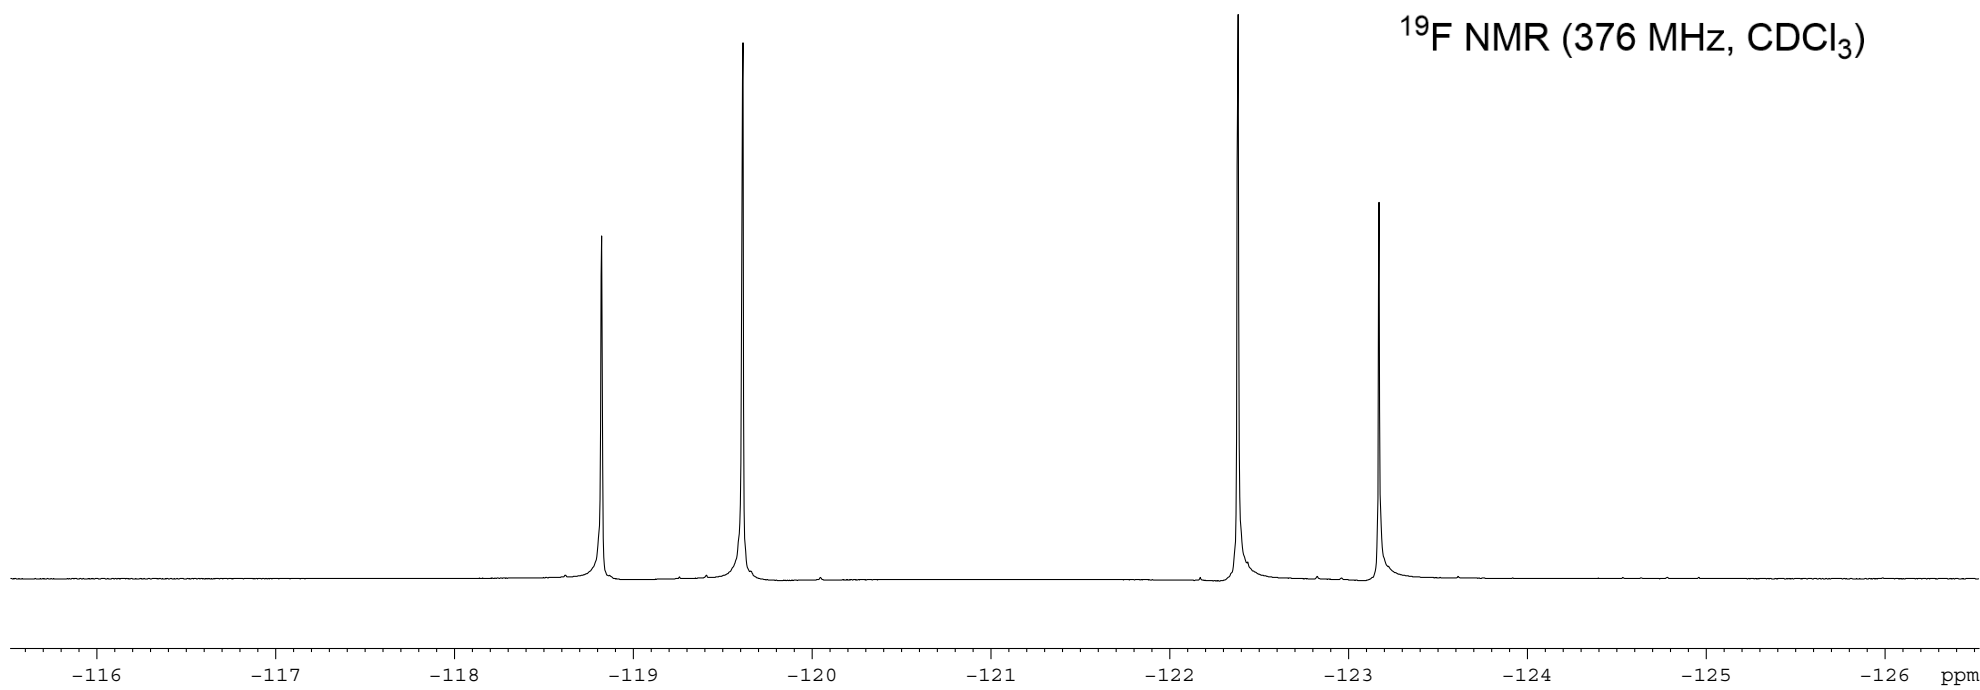

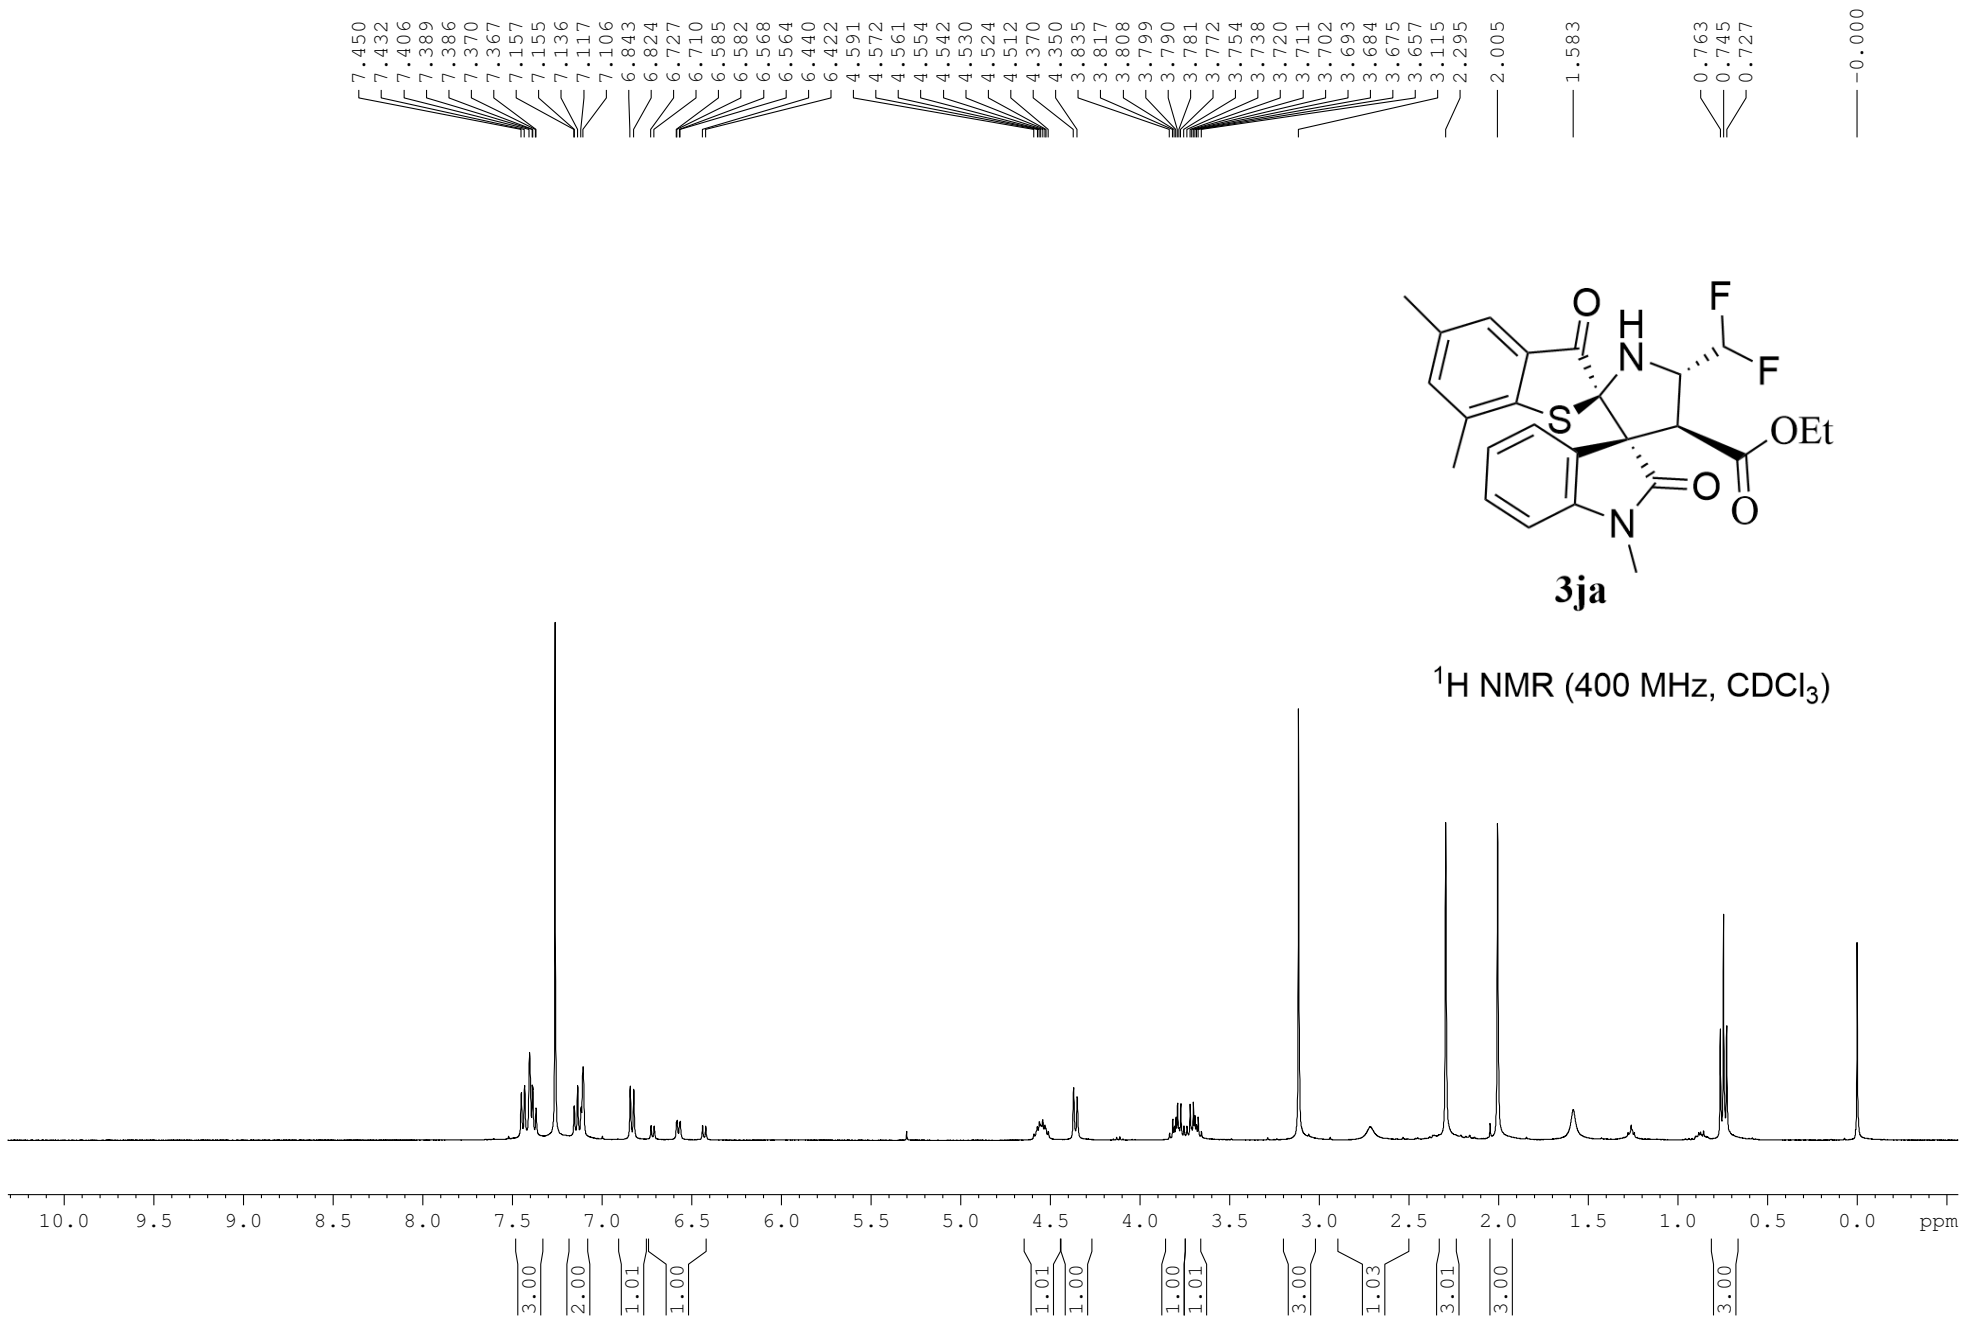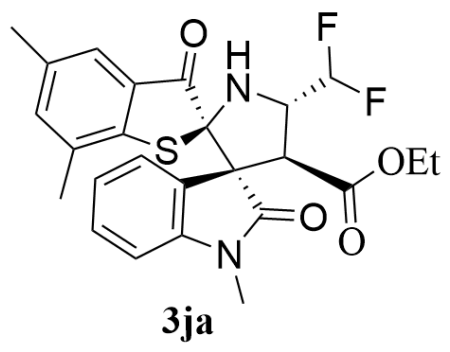

<sup>1</sup>H NMR (400 MHz, CDCl<sub>3</sub>)

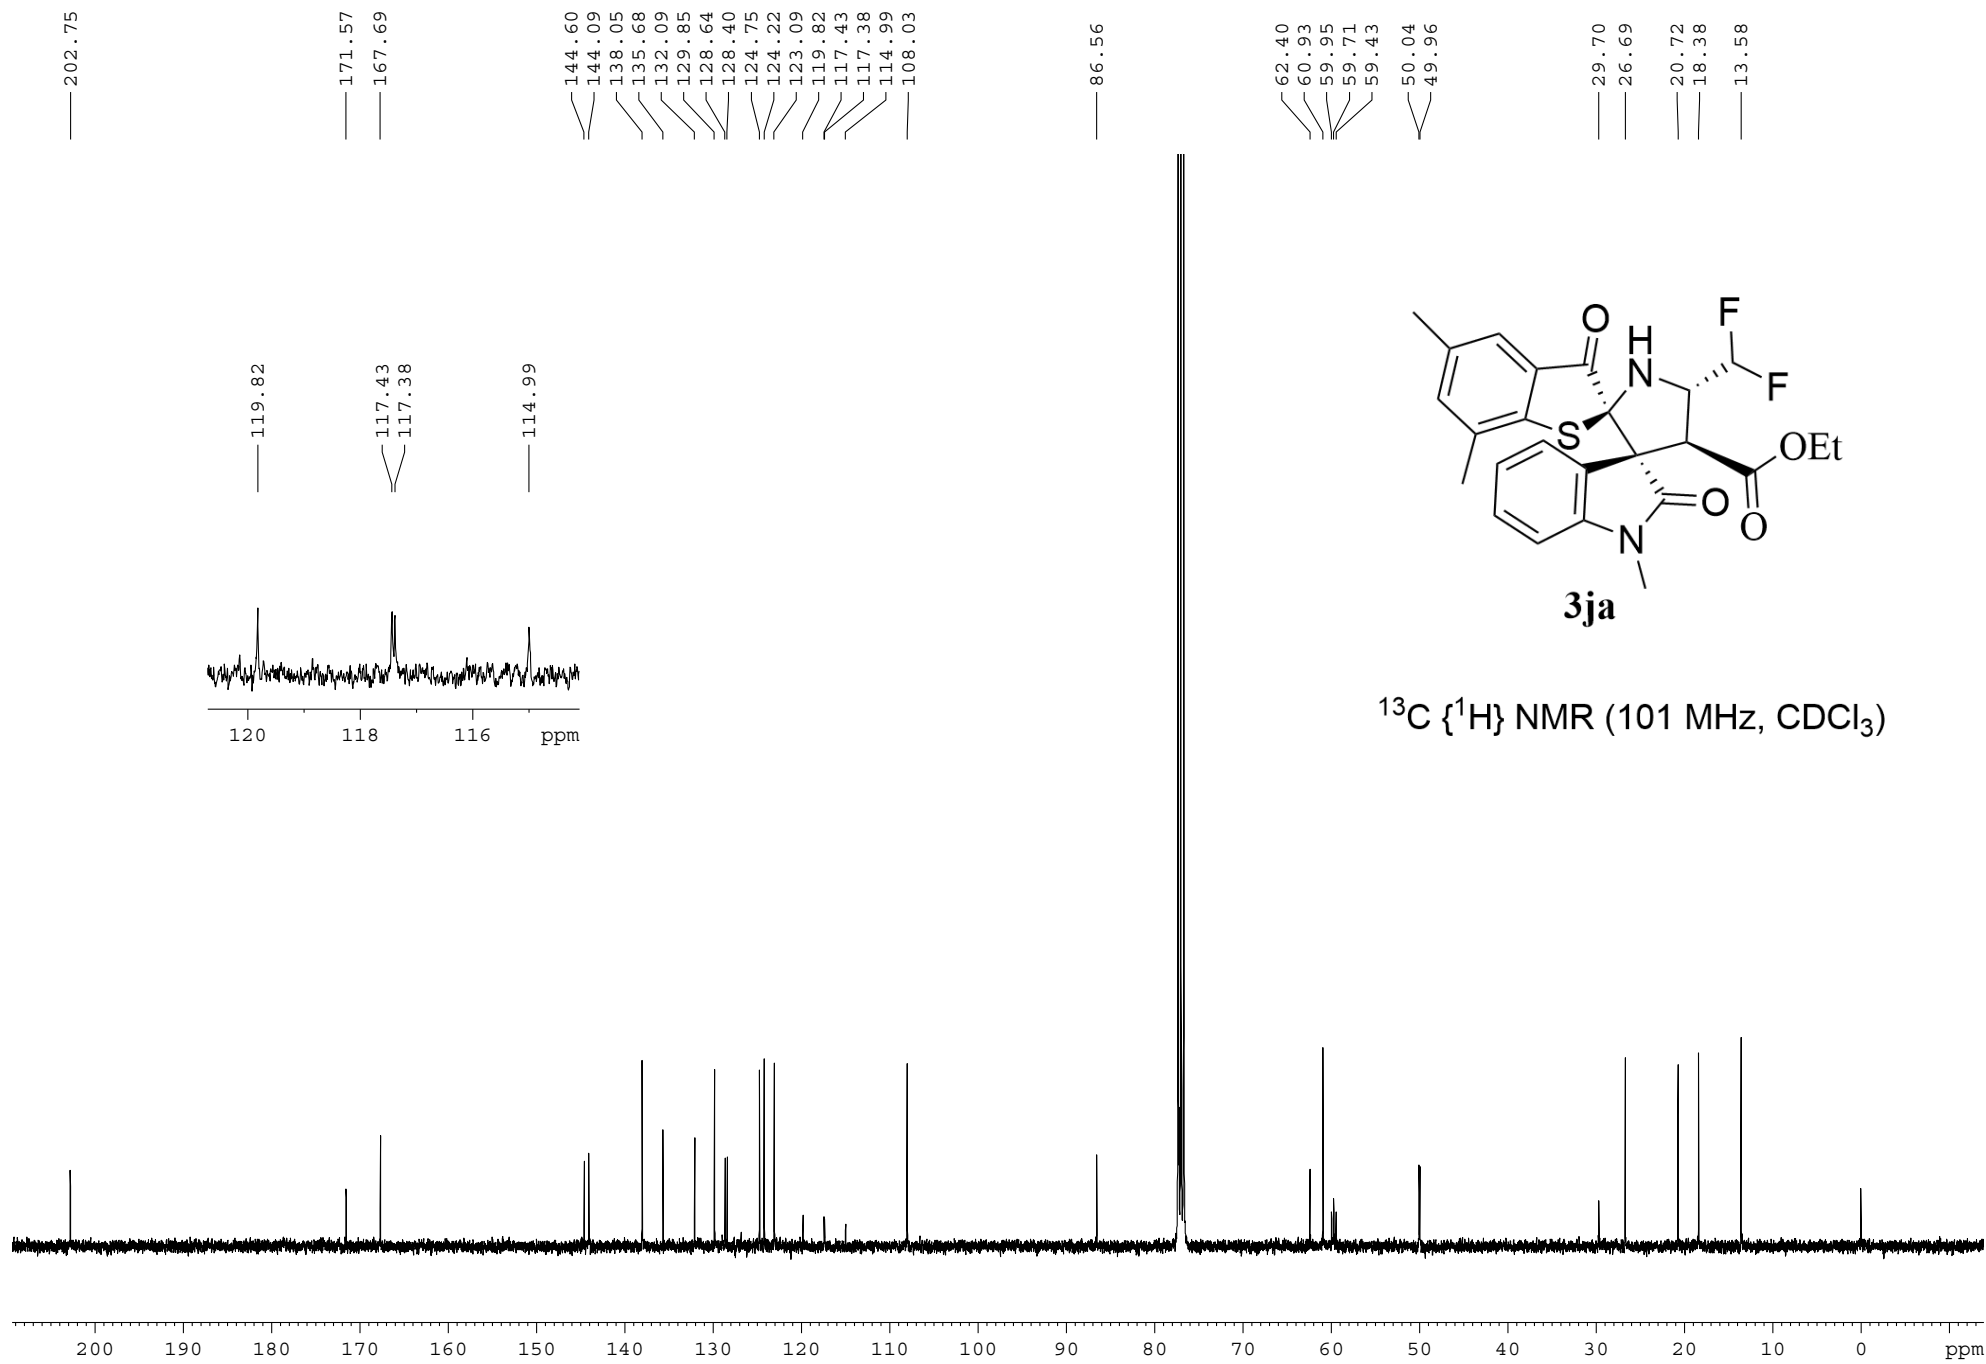

— -119.031

— -119.819

— -122.580

— -123.367

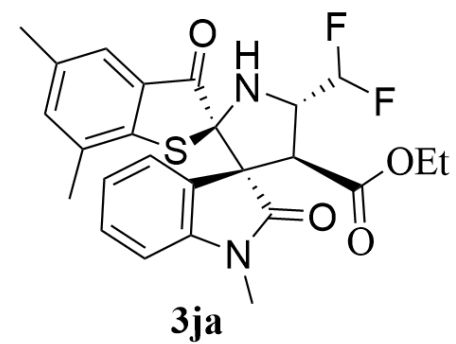

$^{19}\text{F}$  NMR (376 MHz,  $\text{CDCl}_3$ )

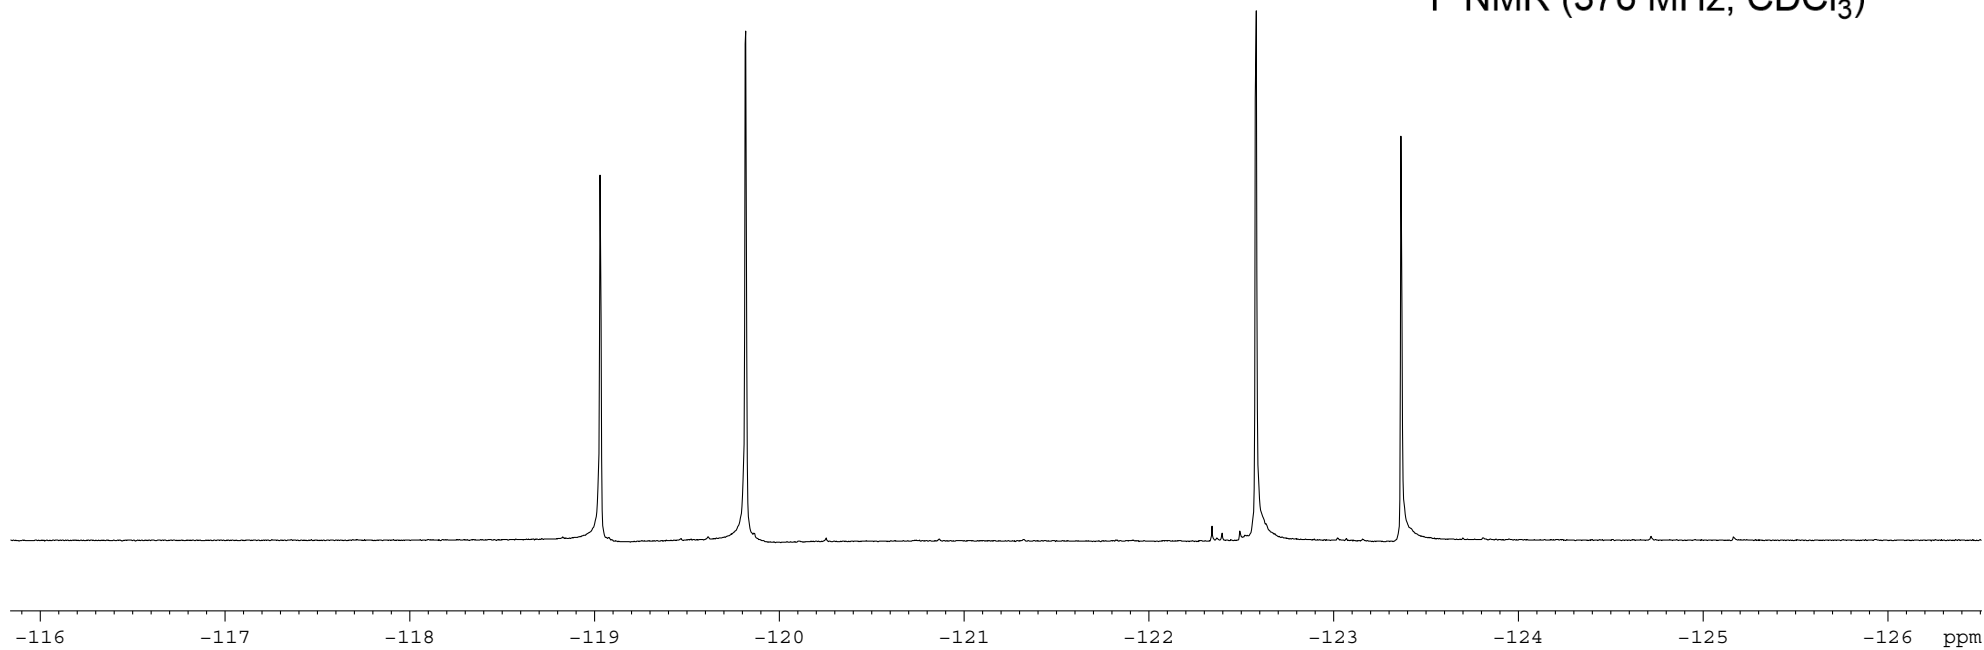

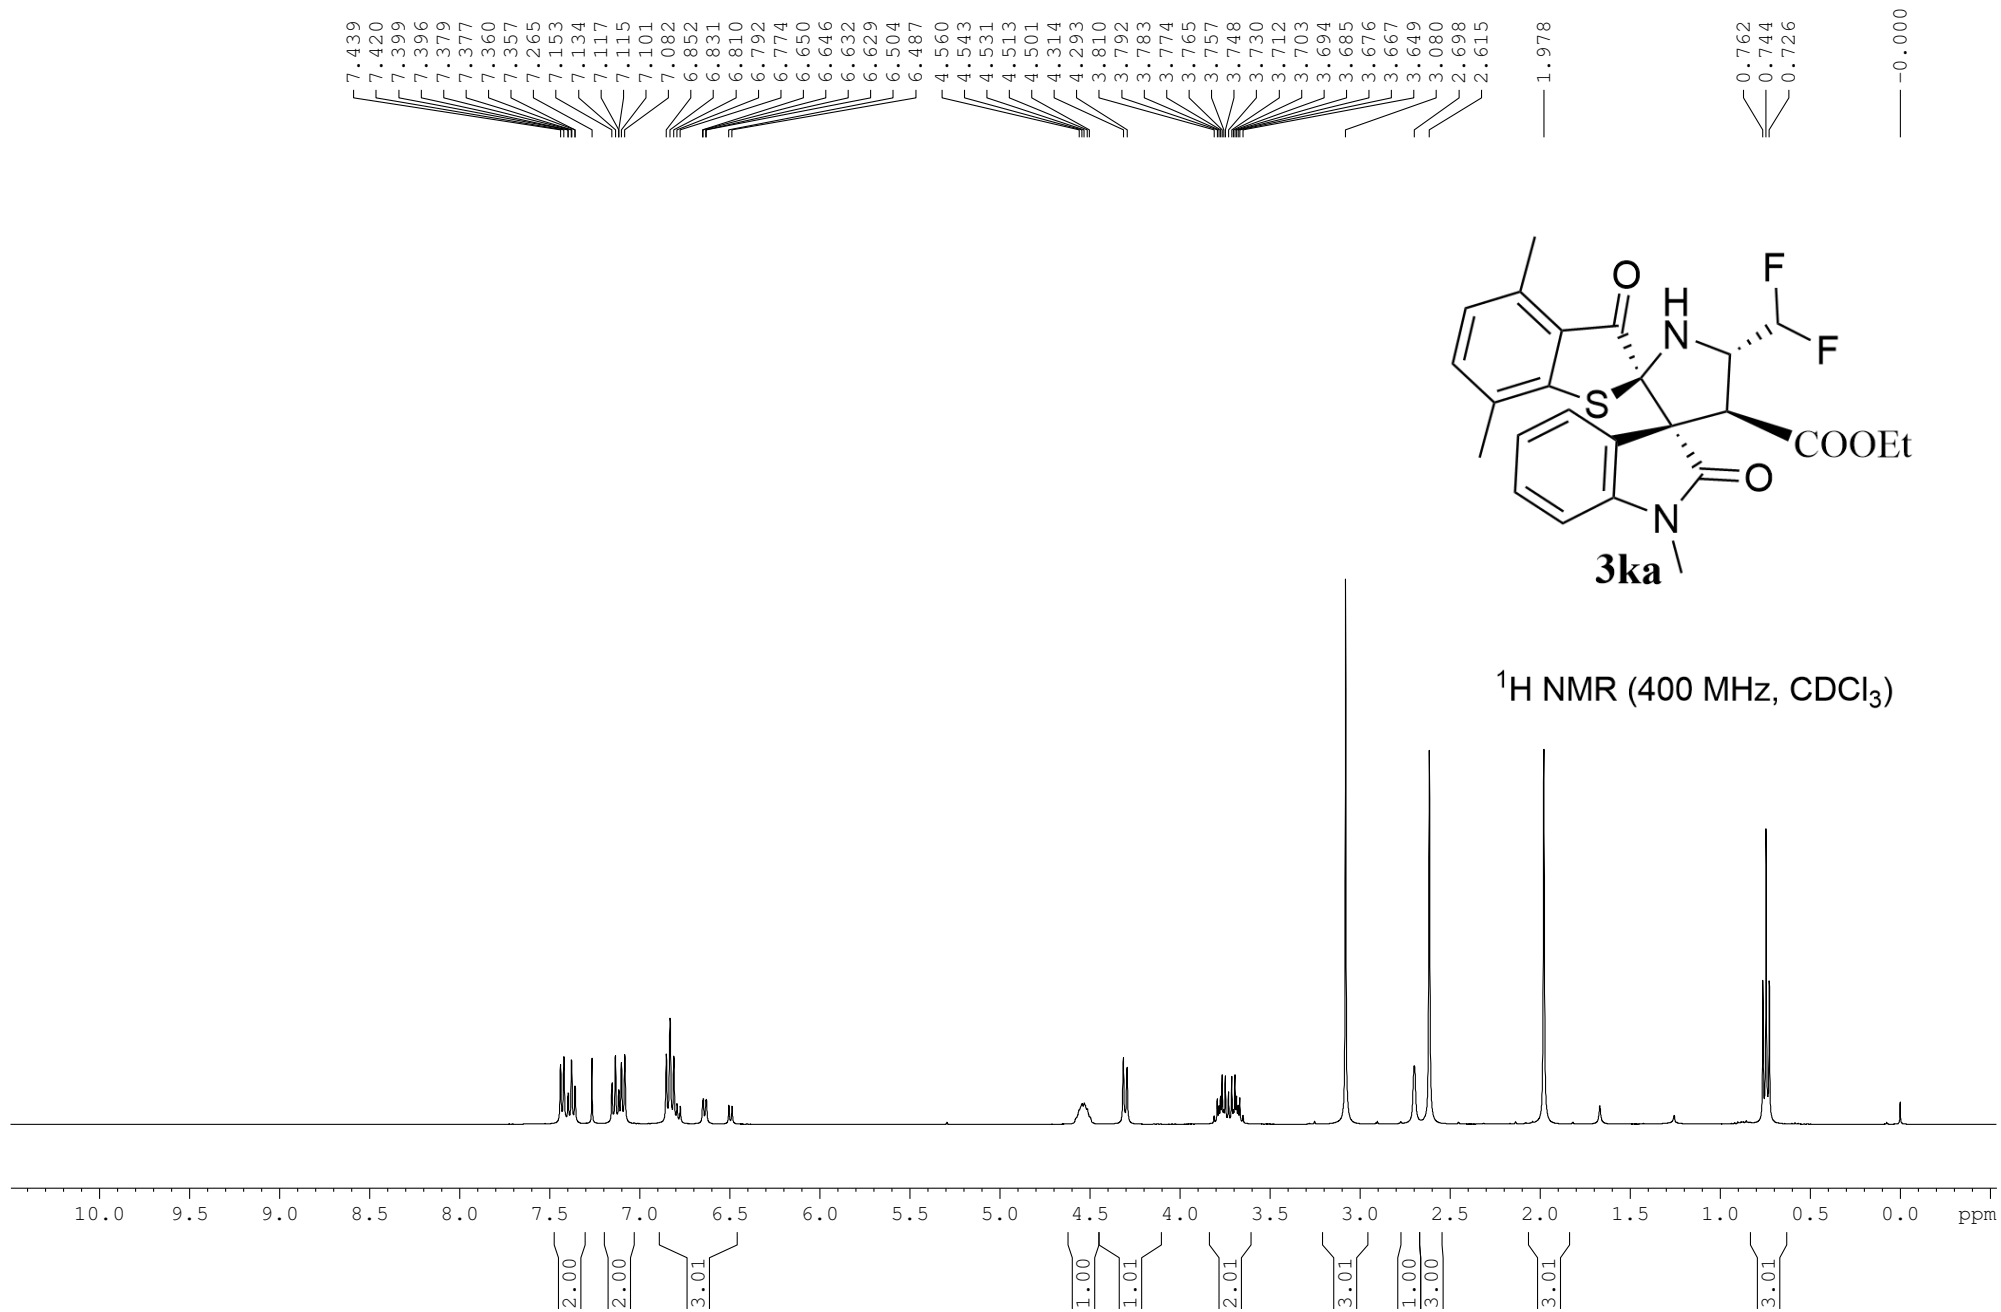

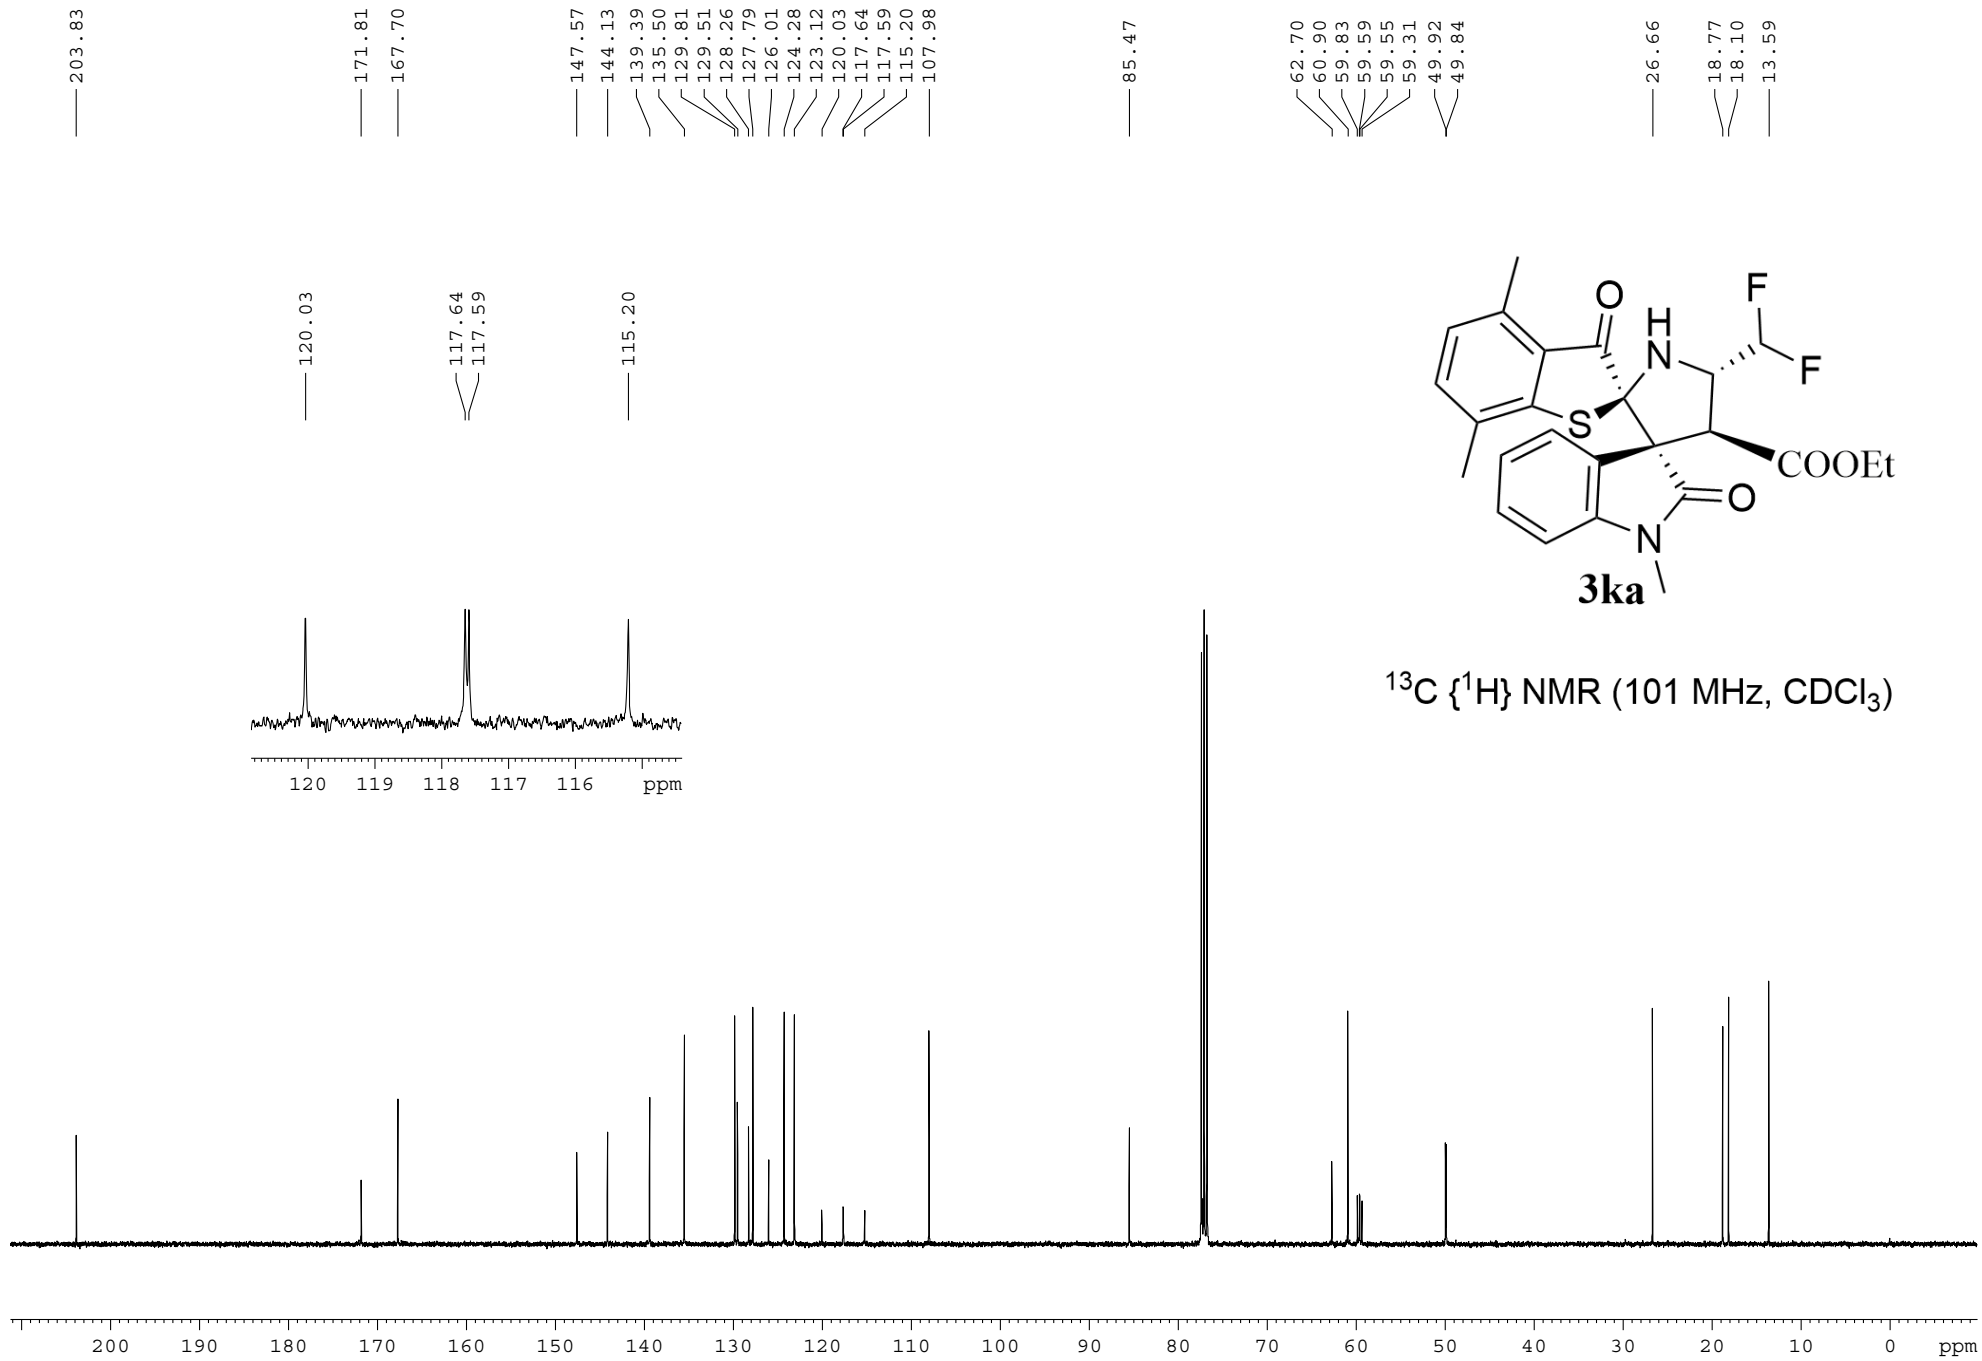

-118.865

-119.652

-122.606

-123.392

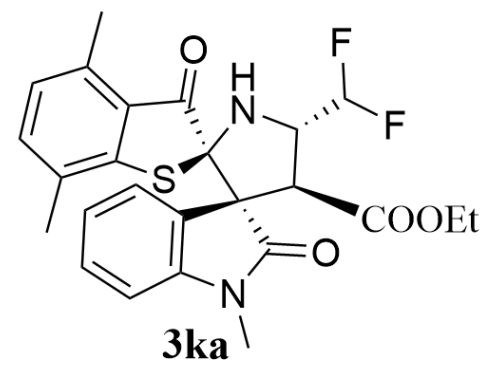

$^{19}\text{F}$  NMR (376 MHz,  $\text{CDCl}_3$ )

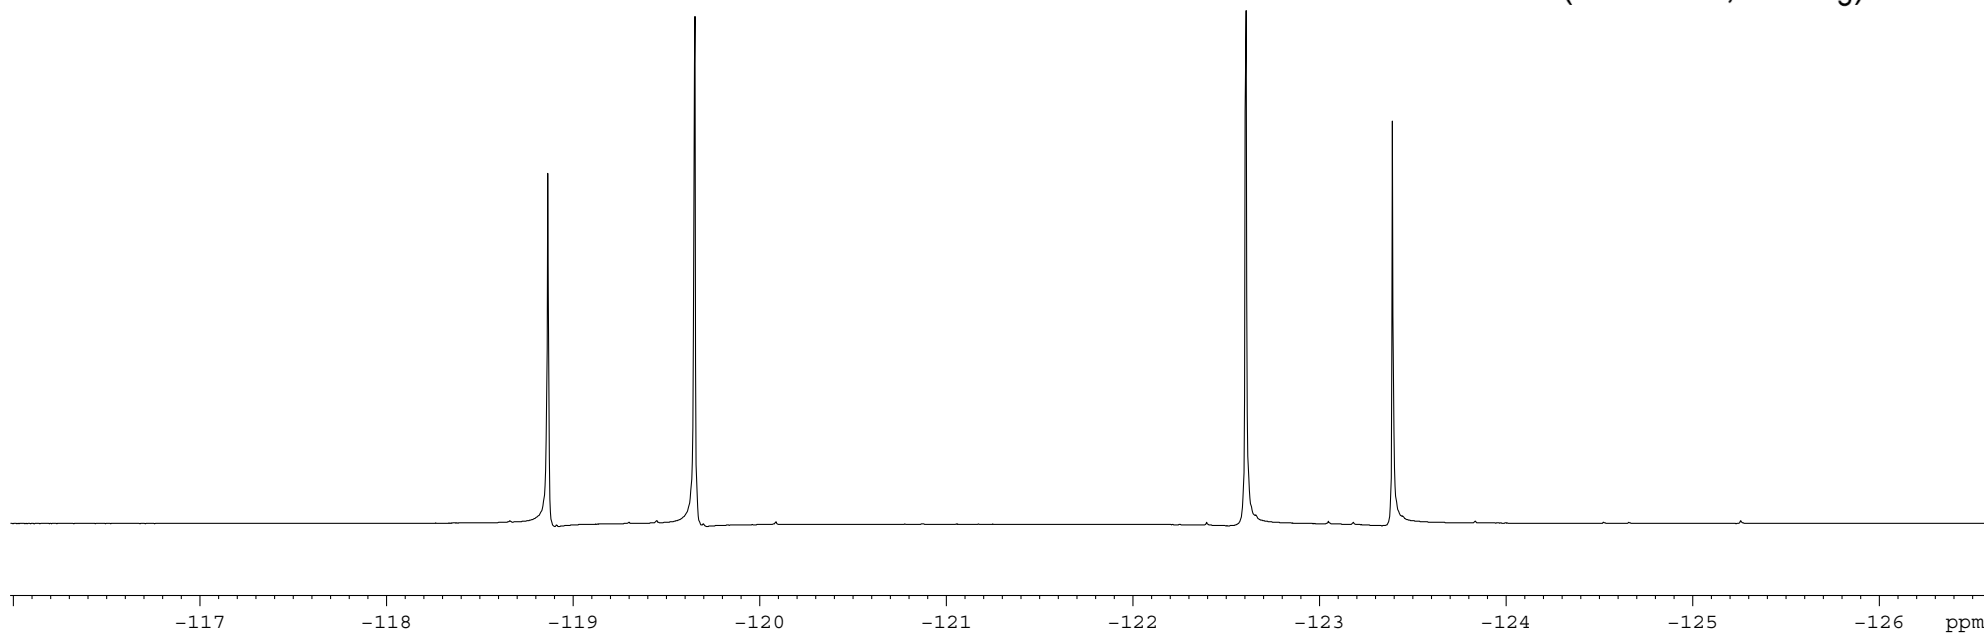

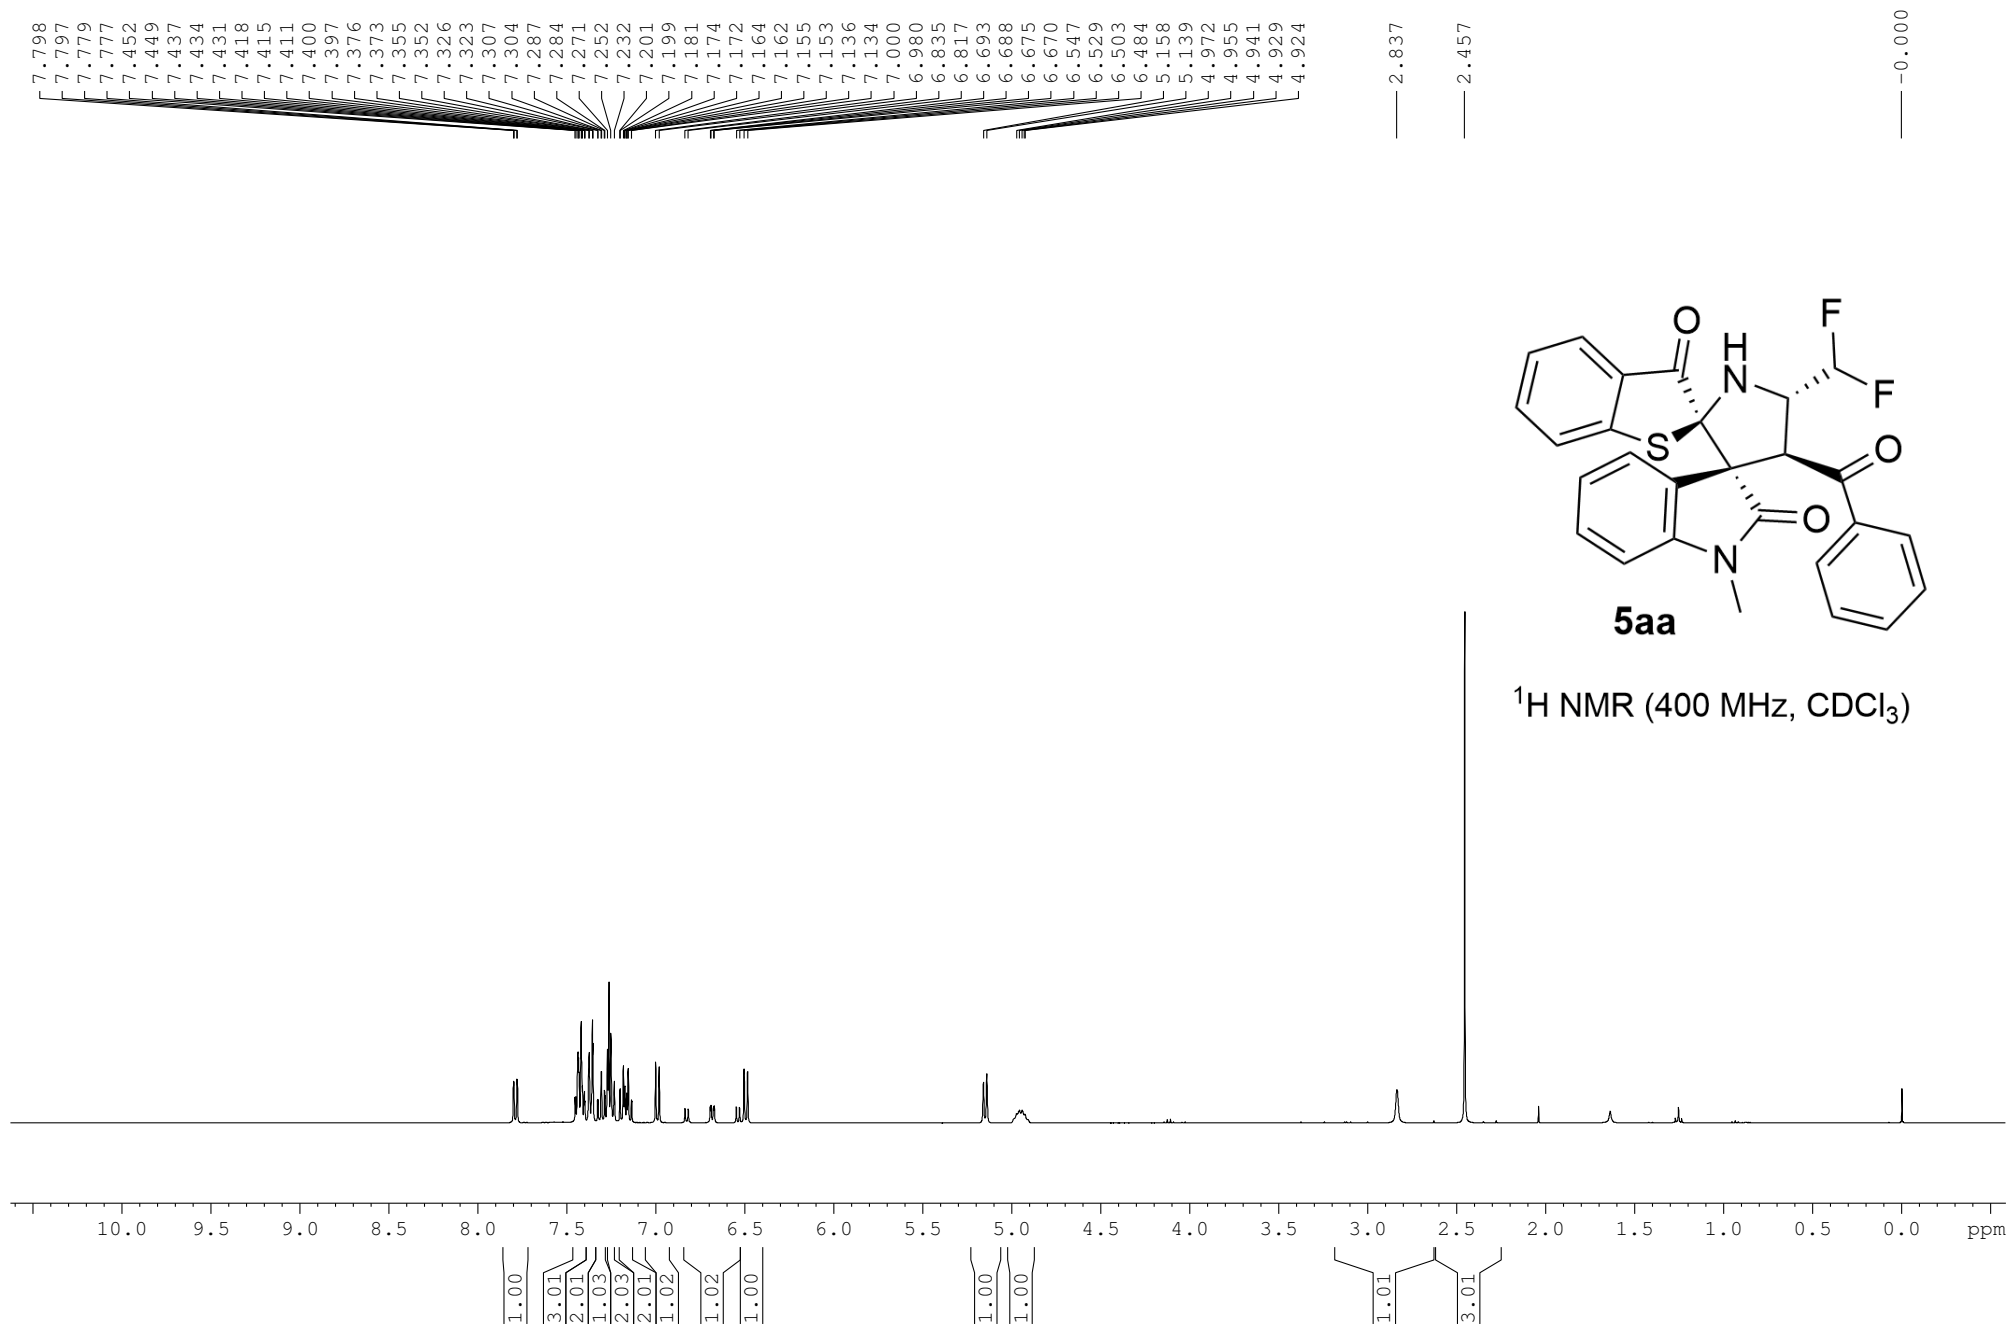



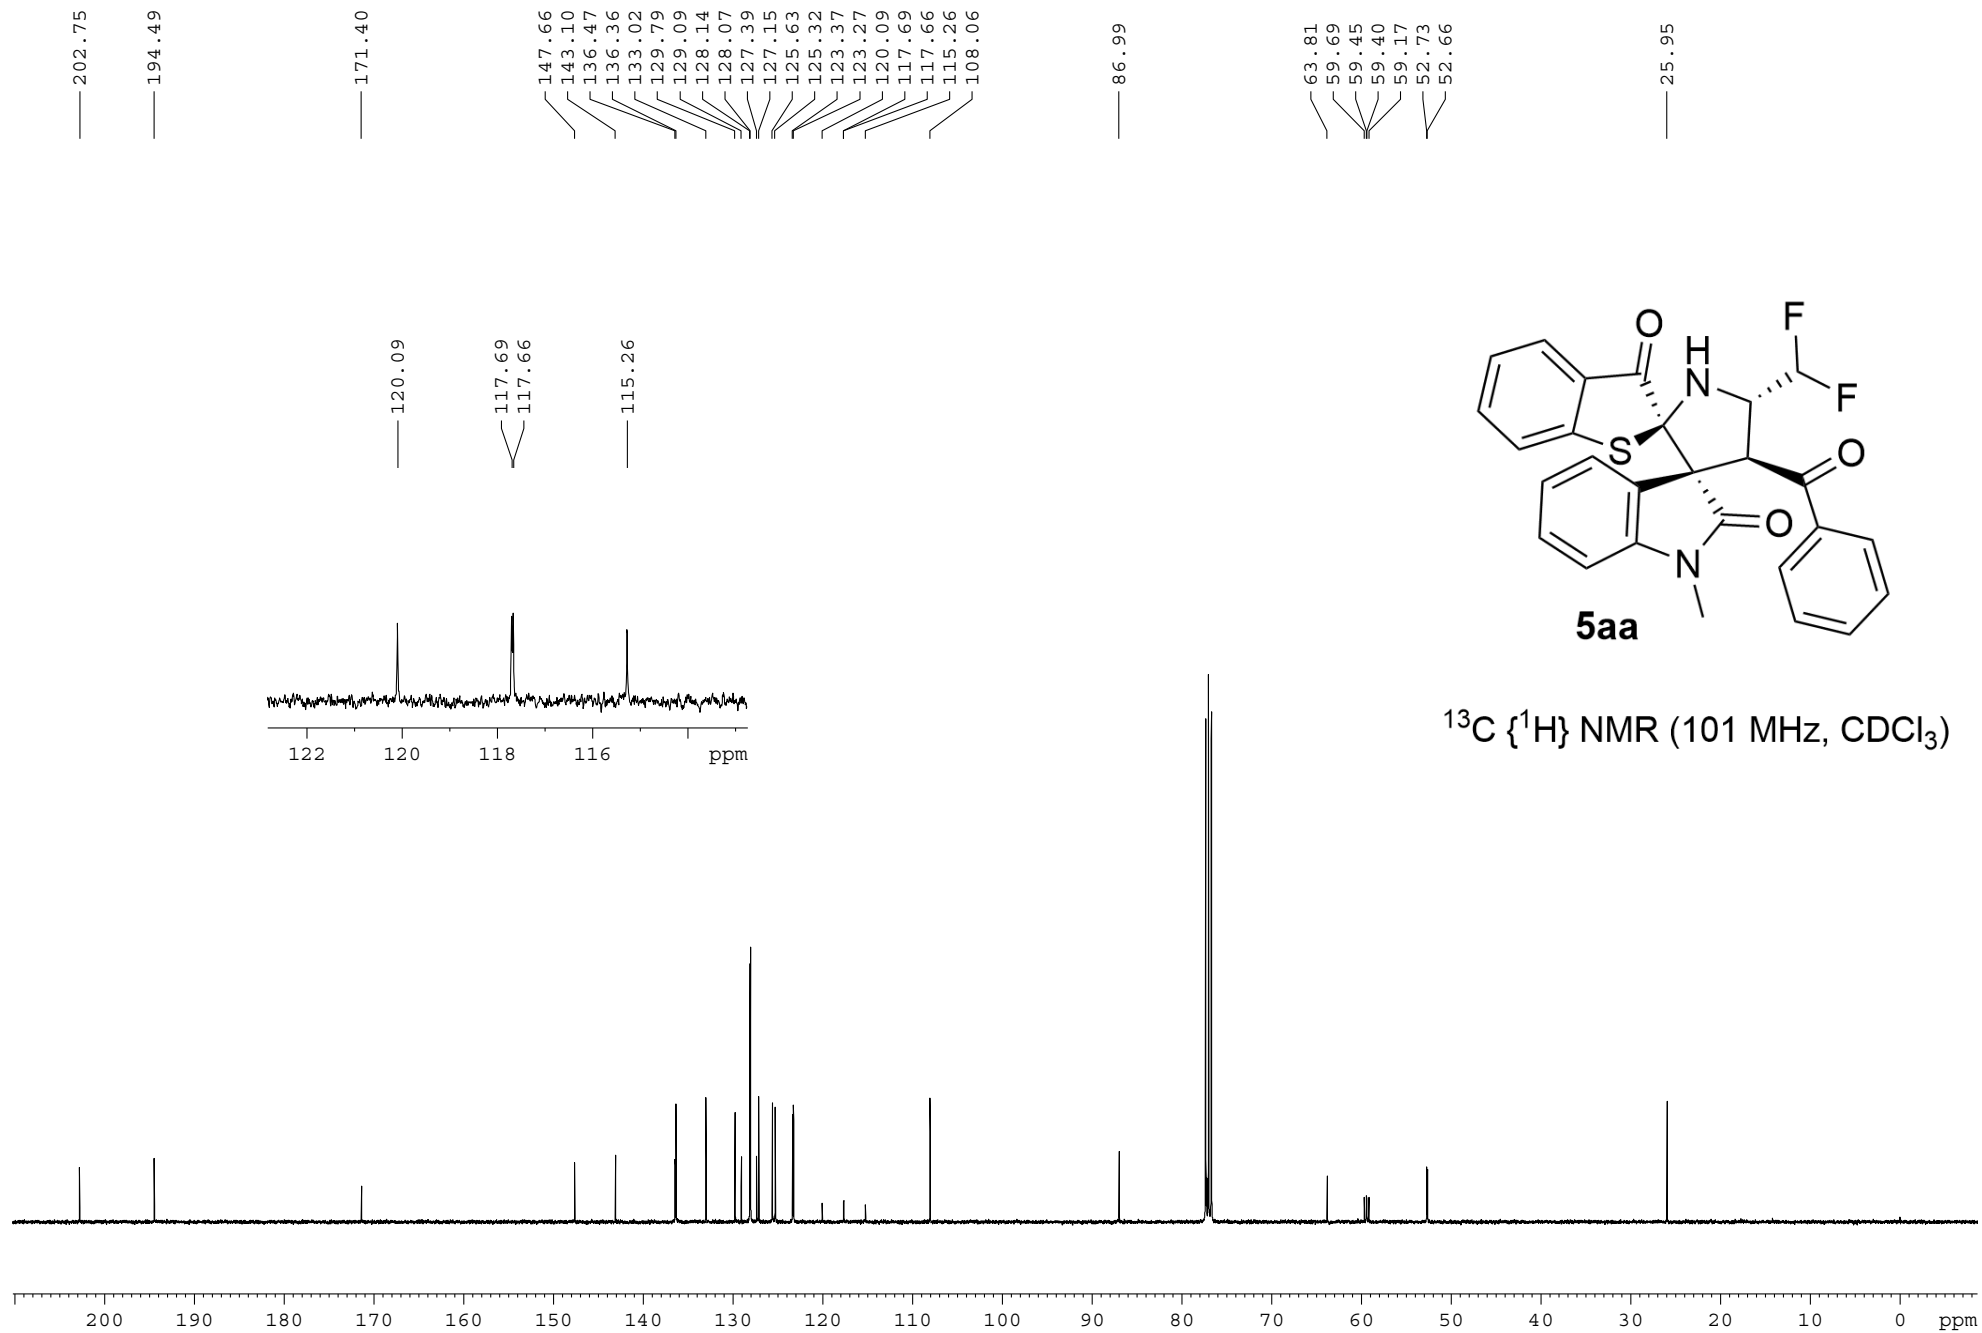

— -118.536

— -119.322

— -123.009

— -123.796

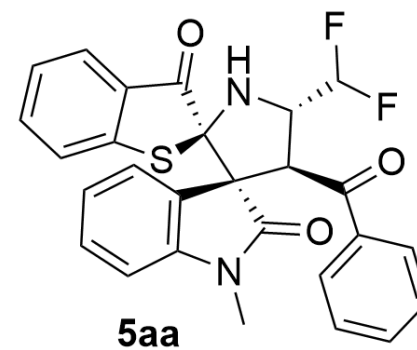

<sup>19</sup>F NMR (376 MHz, CDCl<sub>3</sub>)

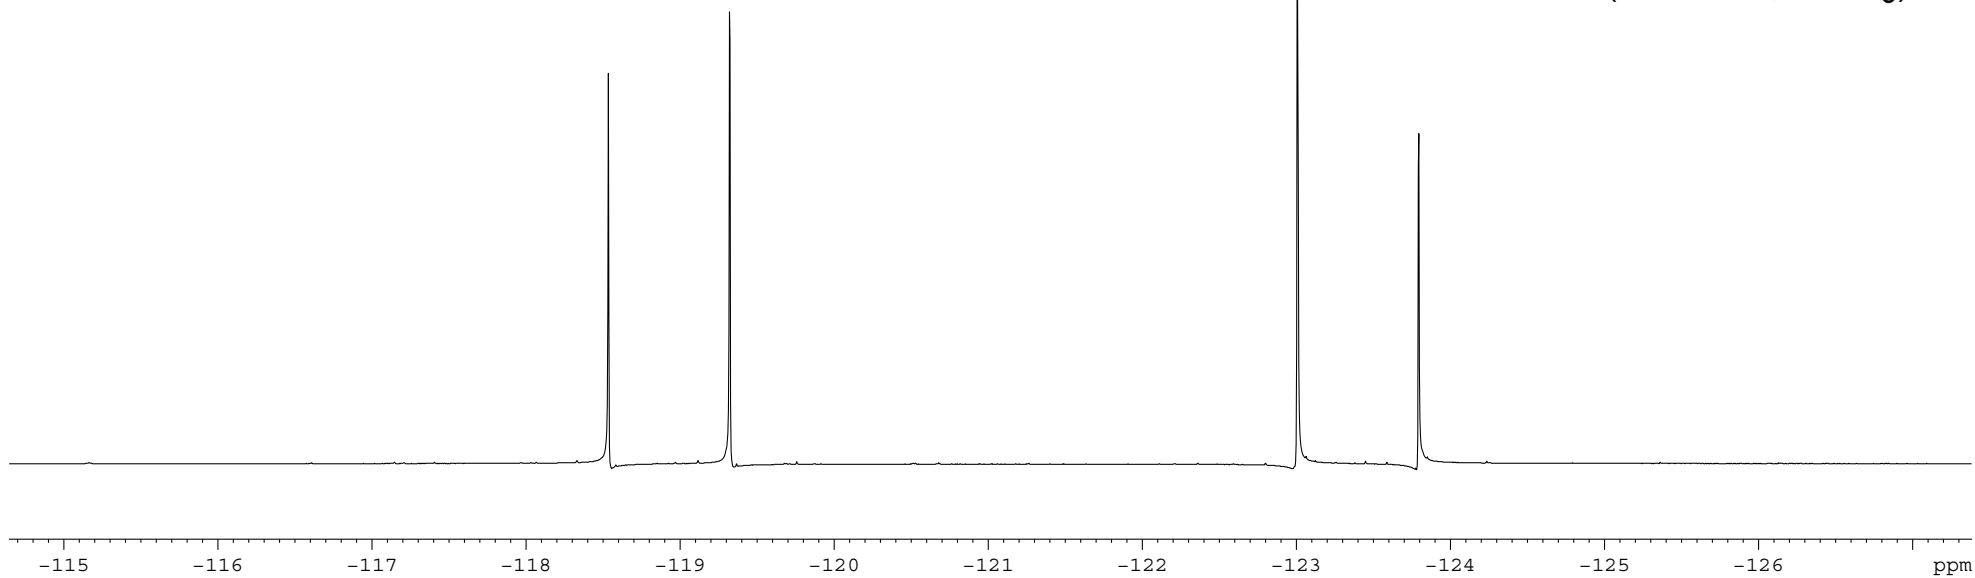

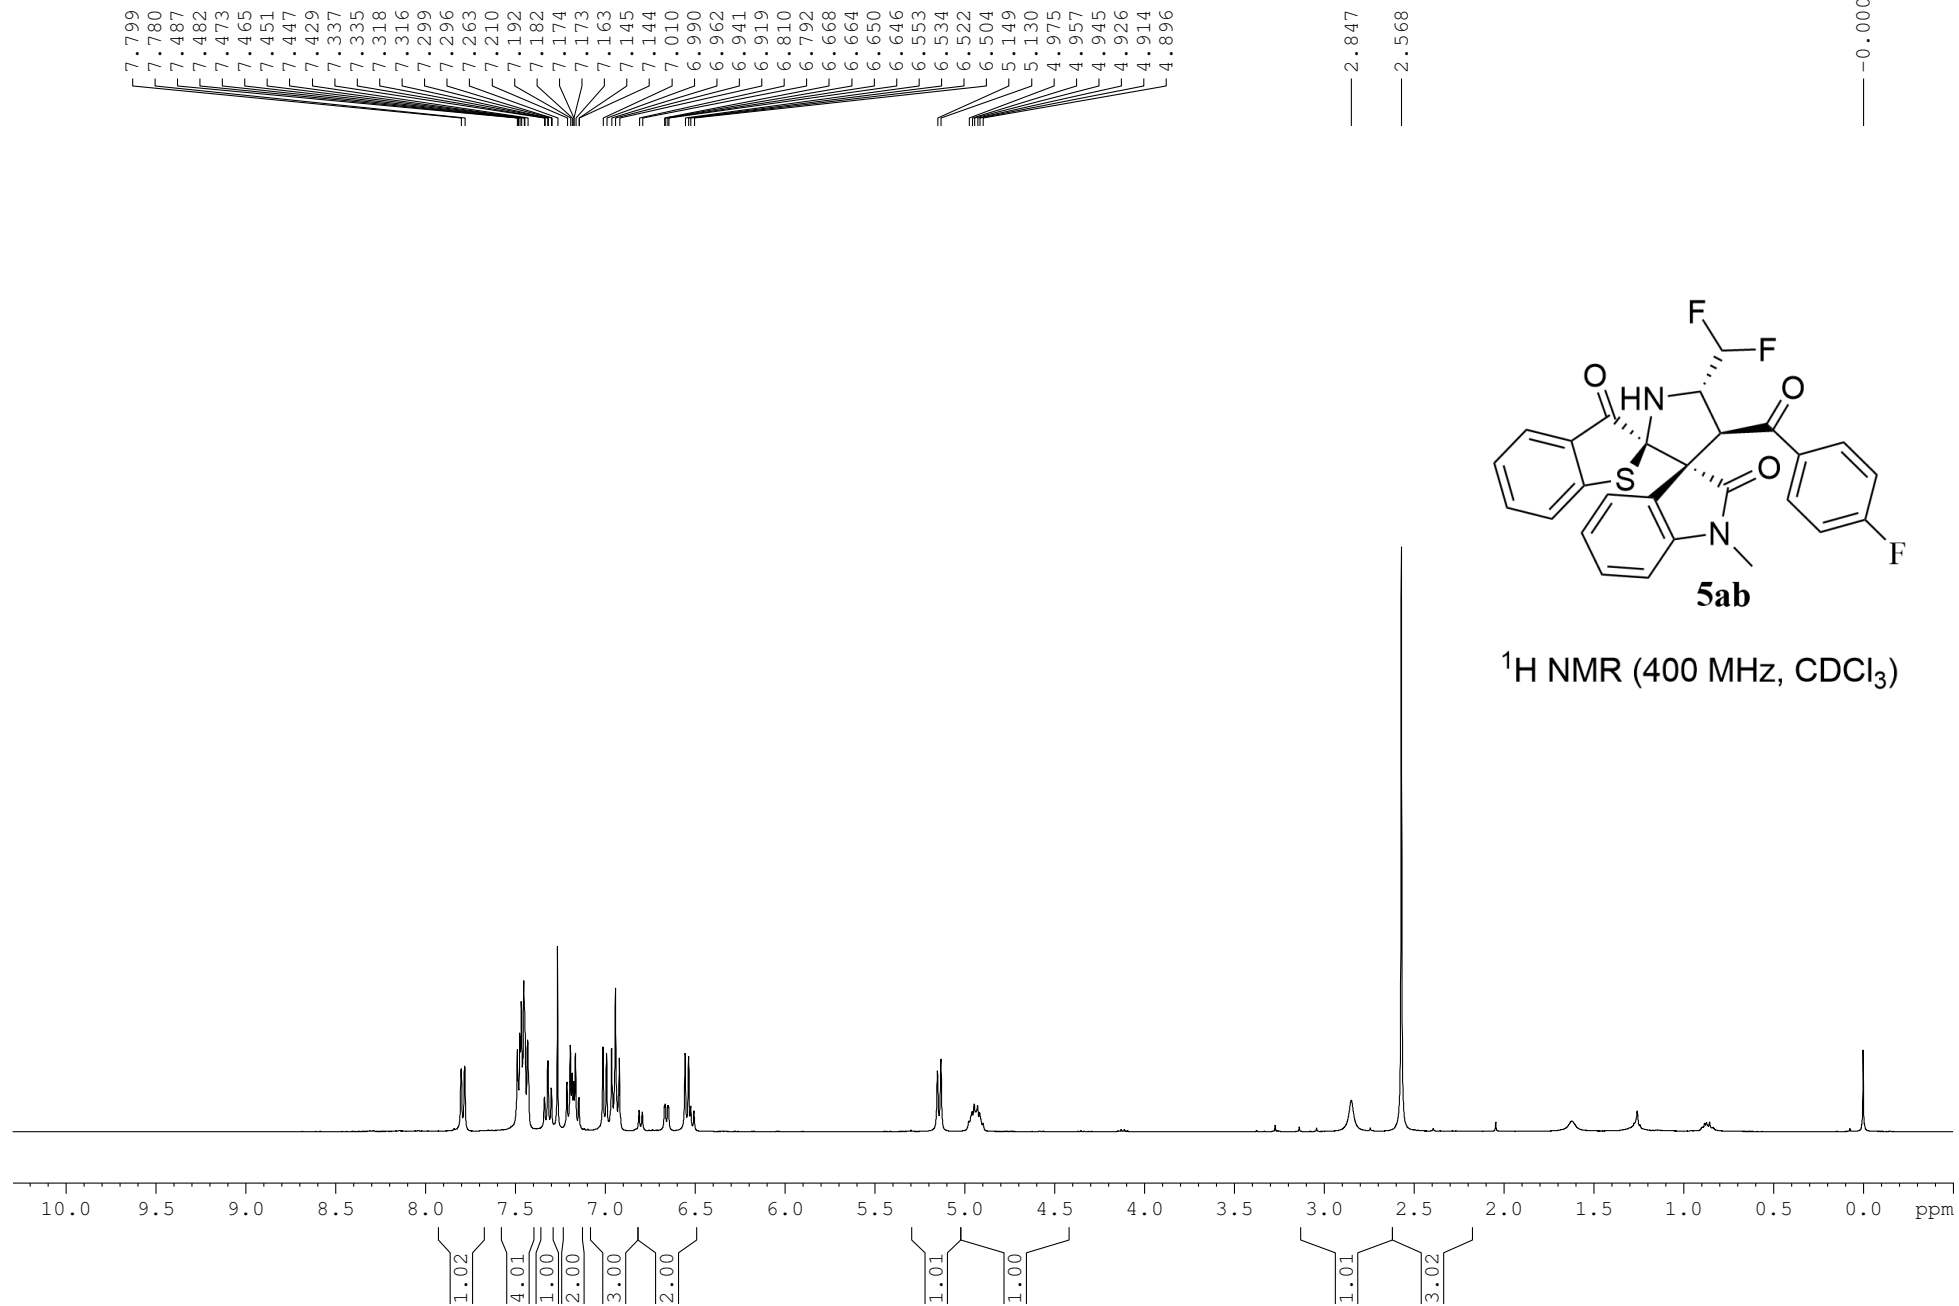

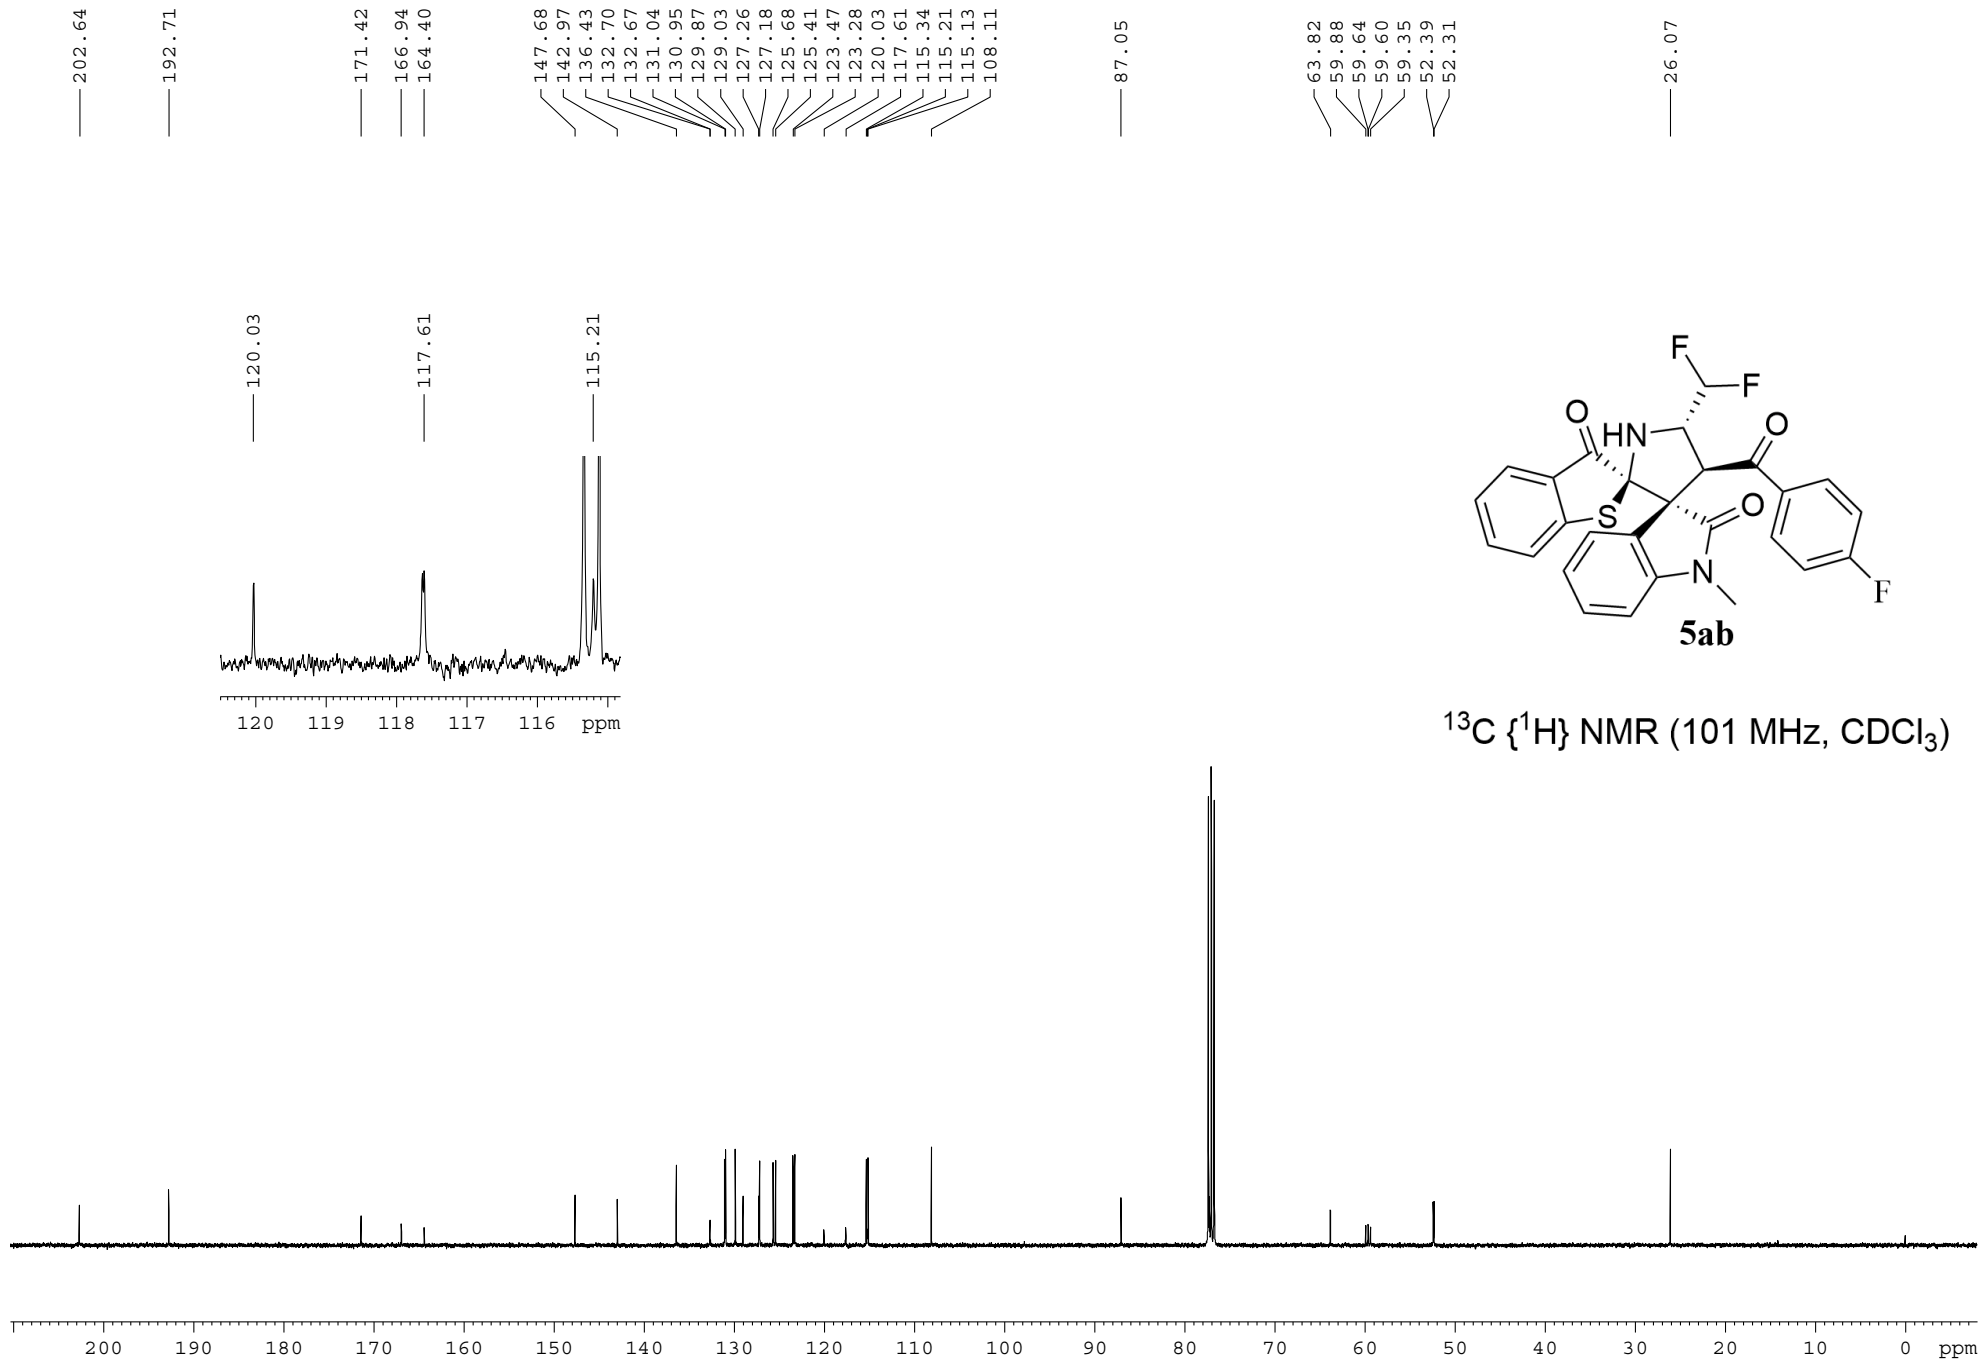

— -104.490

— -118.541

— -119.328

— -123.016

— -123.804

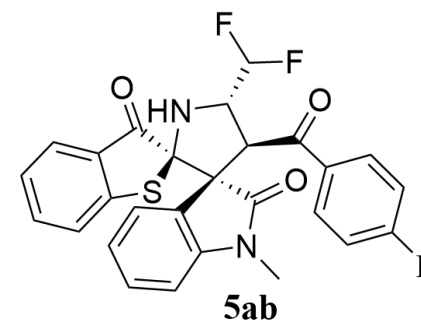

<sup>19</sup>F NMR (376 MHz, CDCl<sub>3</sub>)

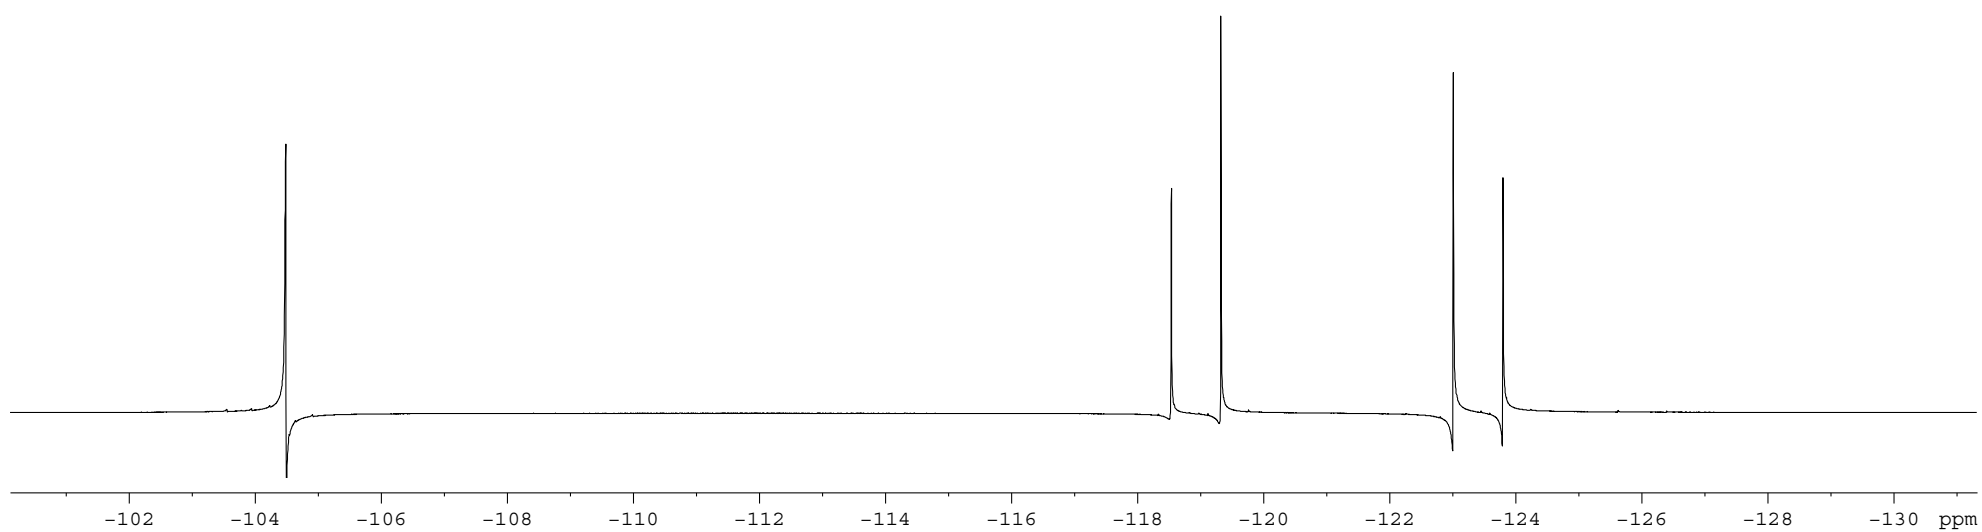

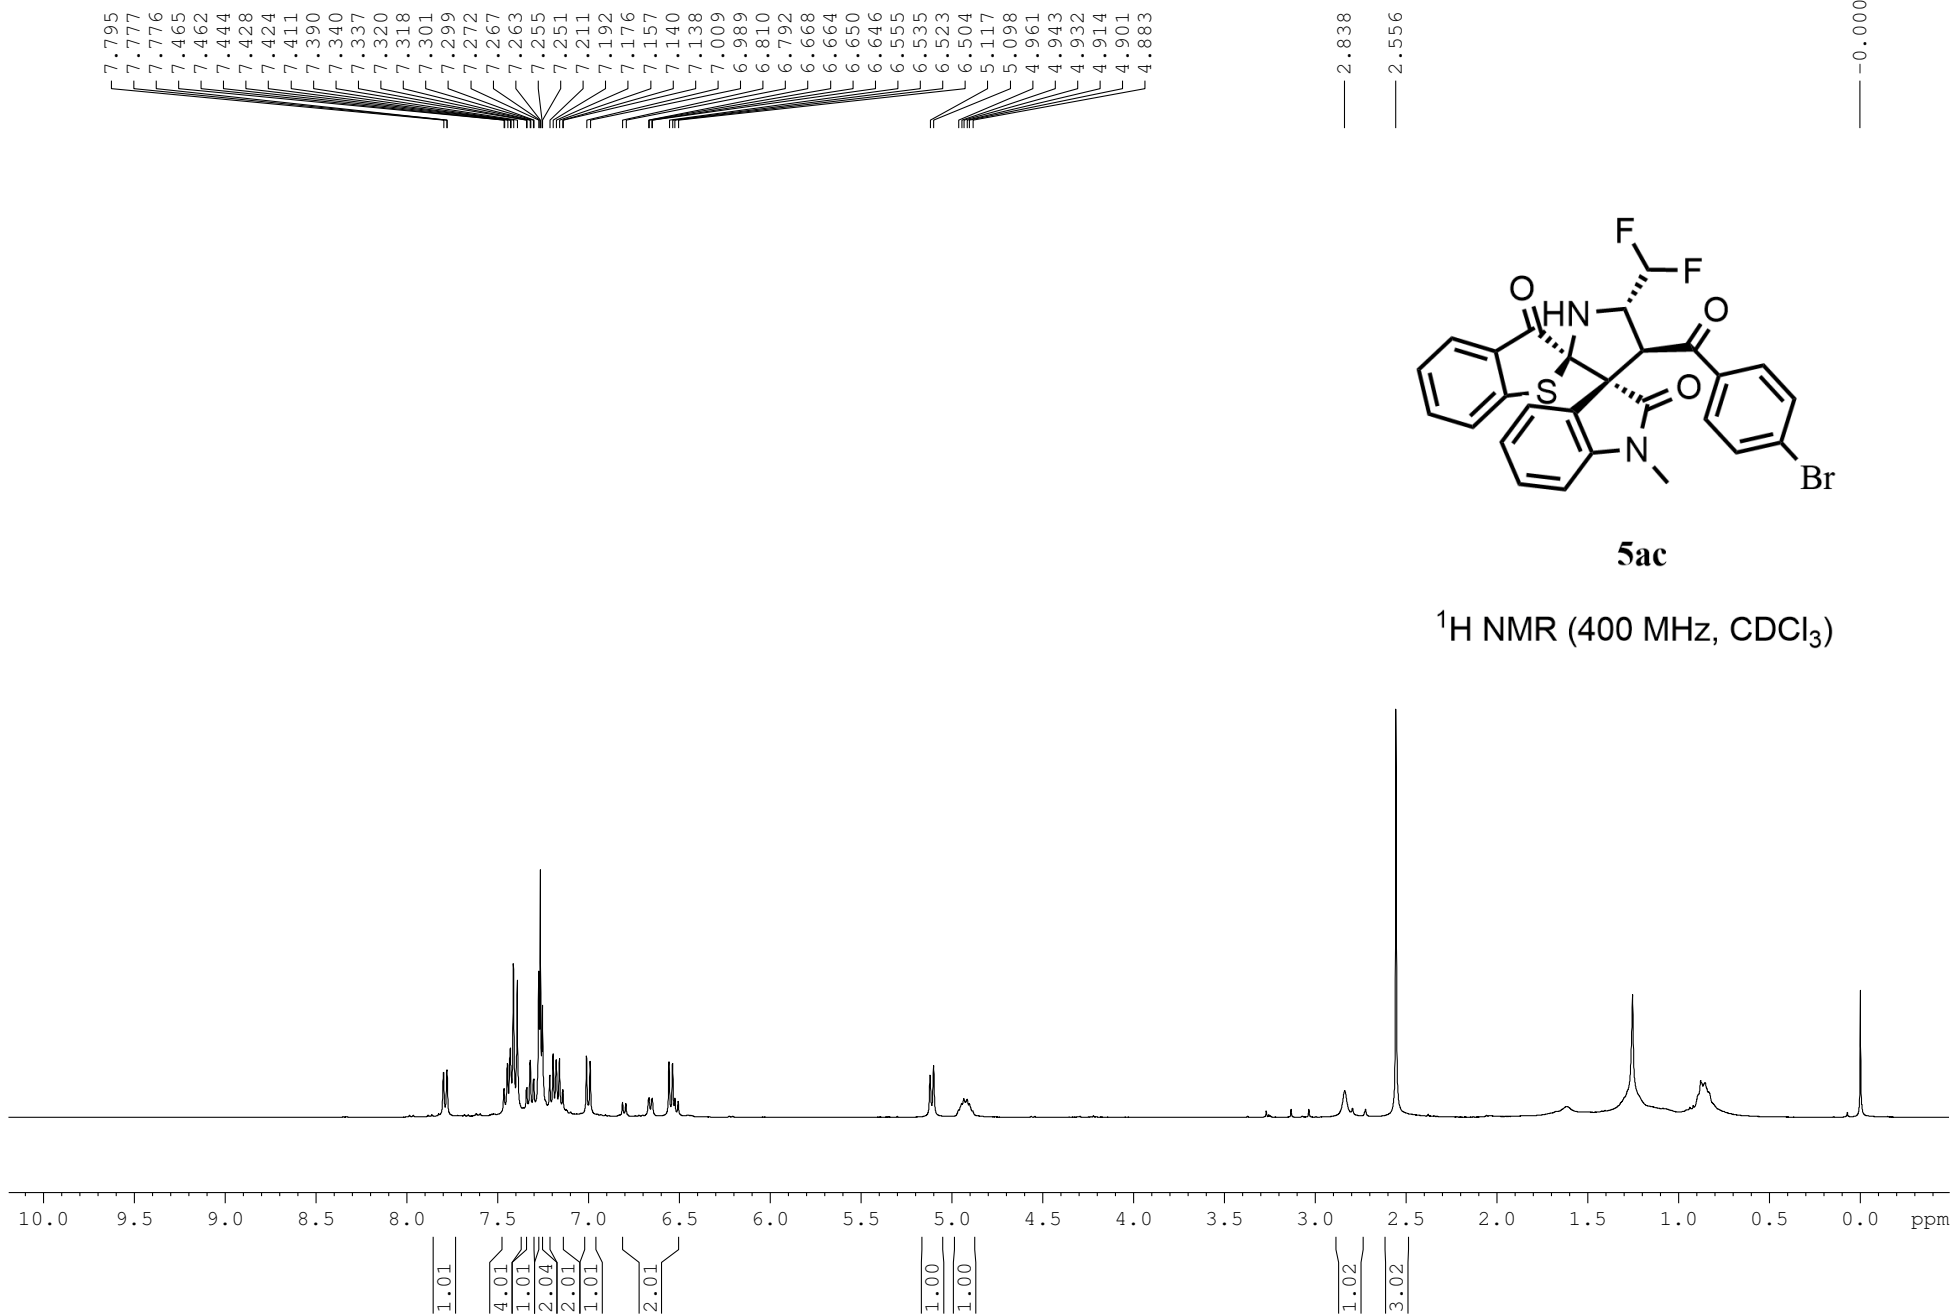

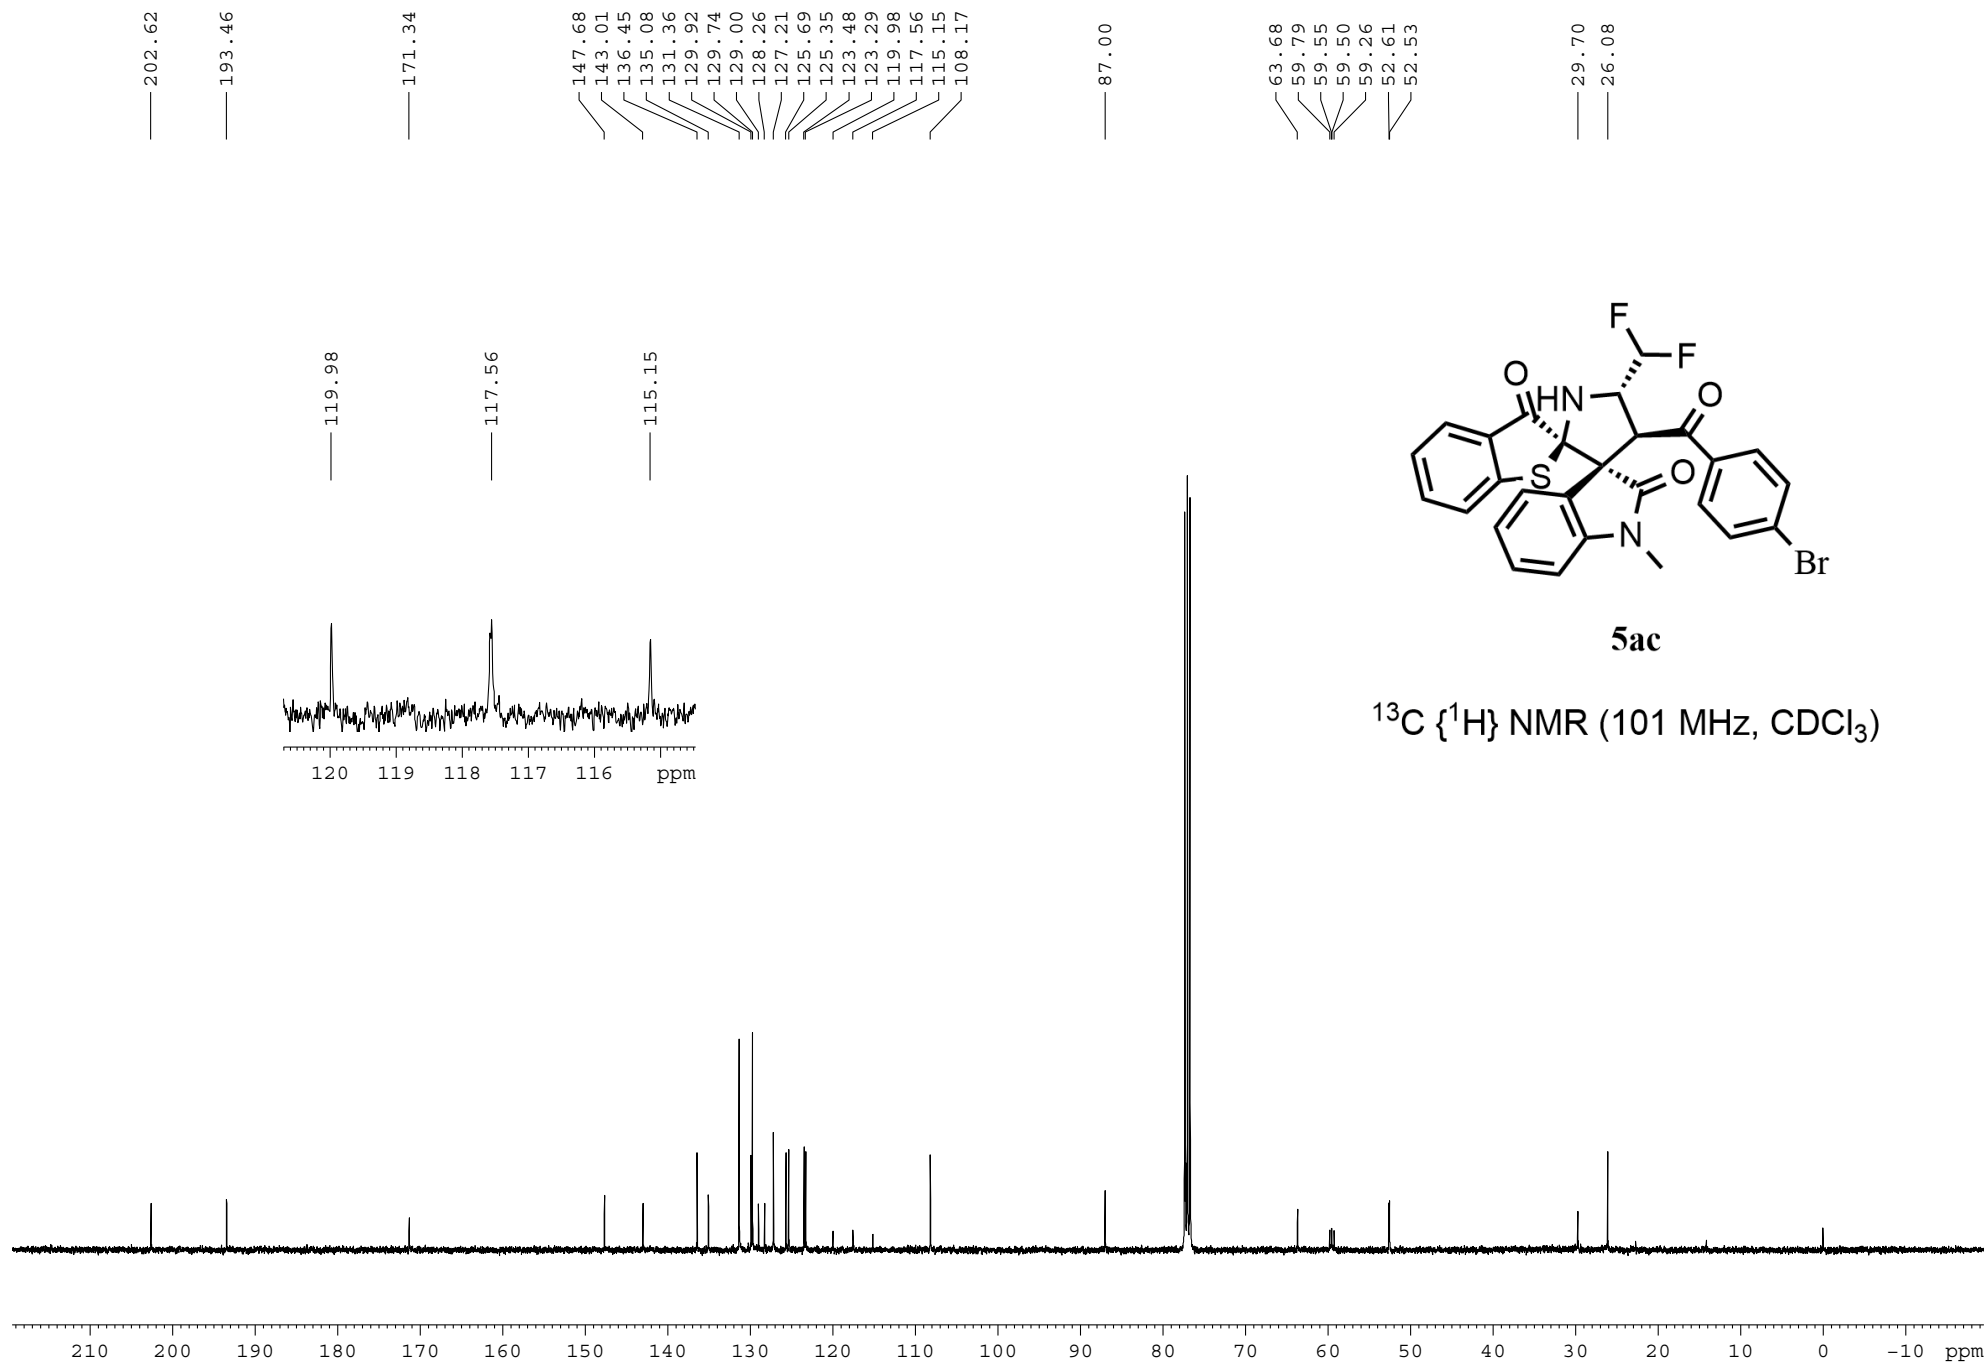

-118.561

-119.349

-122.997

-123.784

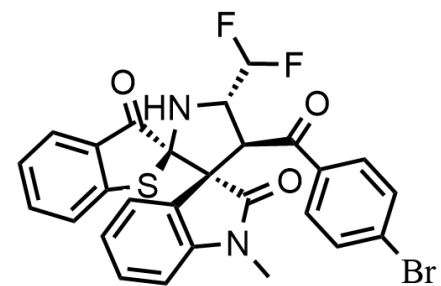

5ac

<sup>19</sup>F NMR (376 MHz, CDCl<sub>3</sub>)

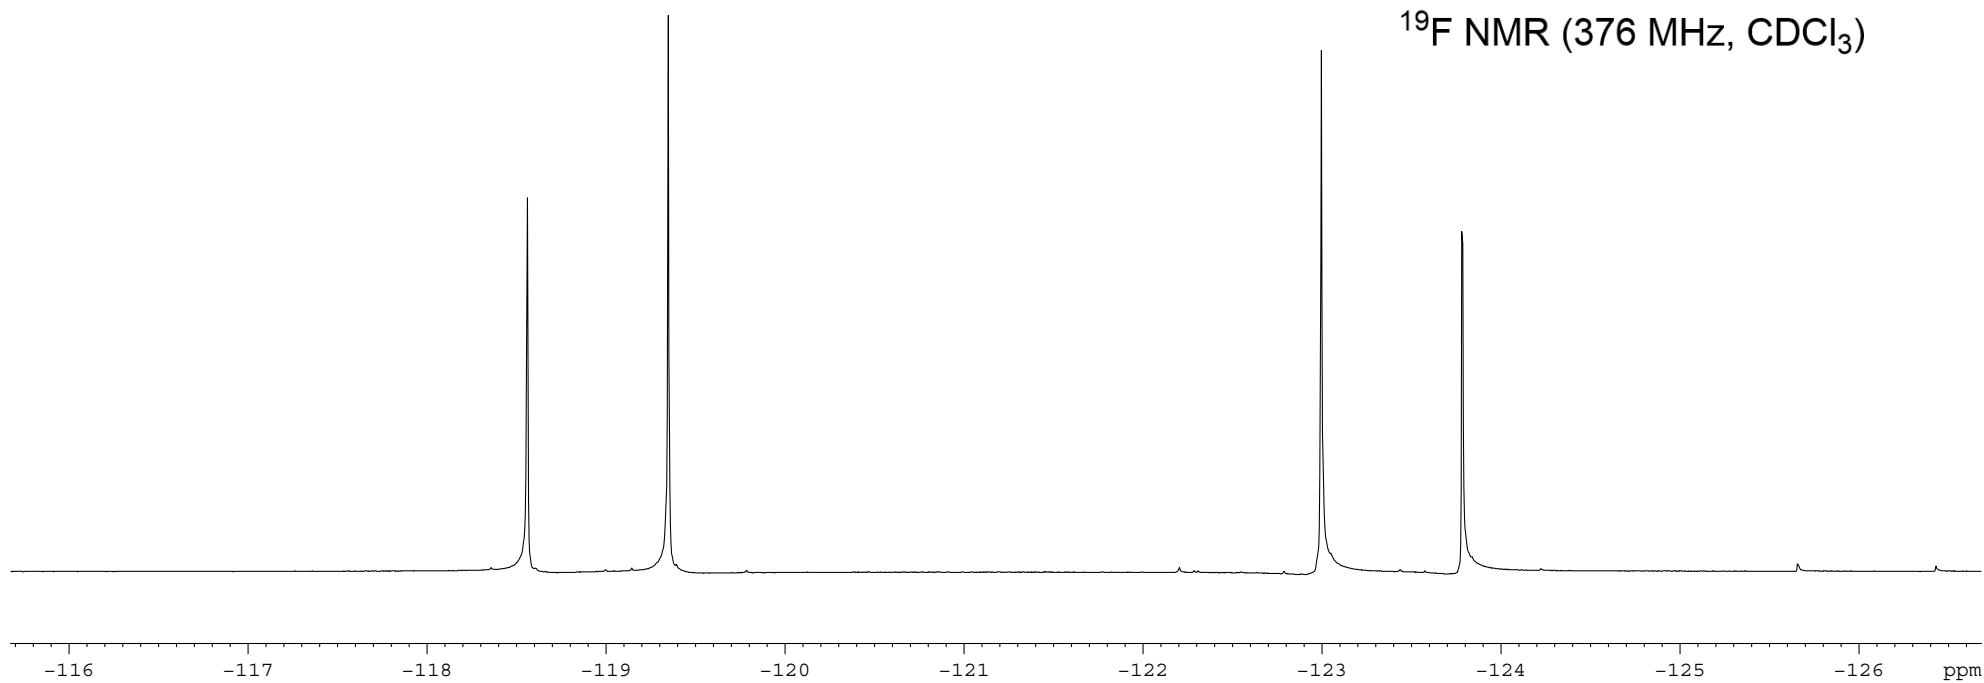



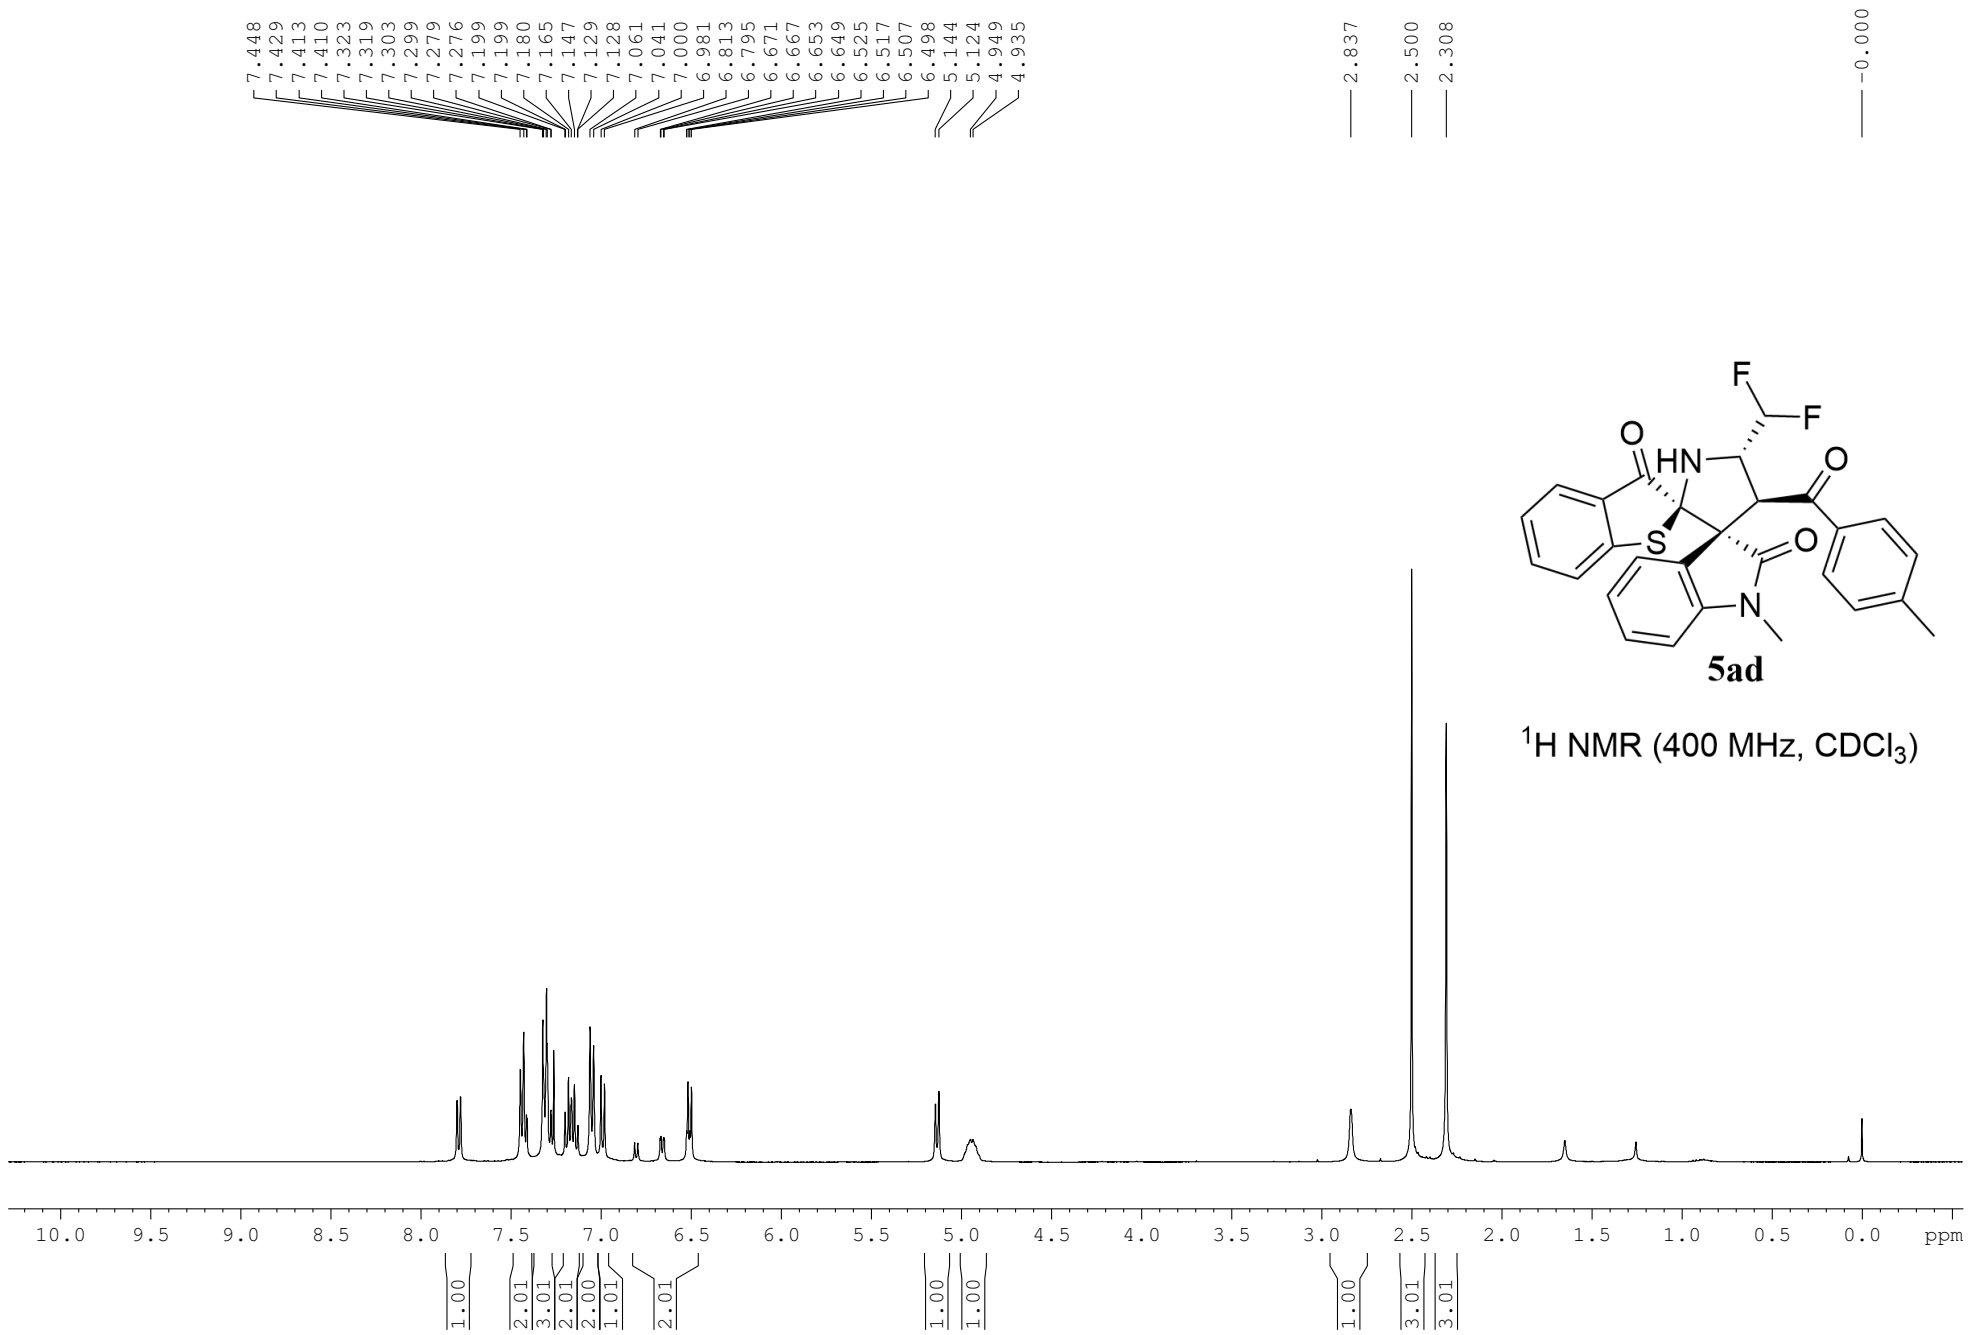

— 202.76

— 193.84

— 171.48

147.70  
143.94  
143.07  
136.34  
133.85  
129.71  
129.12  
128.72  
128.35  
127.45  
127.15  
125.60  
125.38  
123.32  
123.26  
120.12  
117.72  
117.69  
115.30  
108.04

— 87.07

63.95  
59.86  
59.62  
59.57  
59.33  
52.45  
52.38

— 25.99

— 21.54

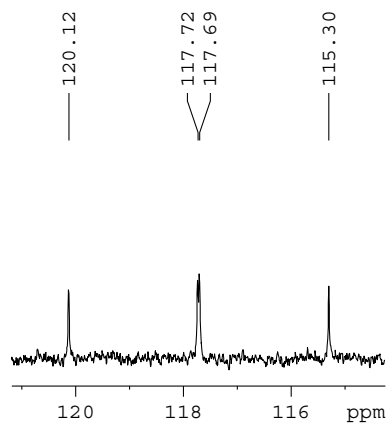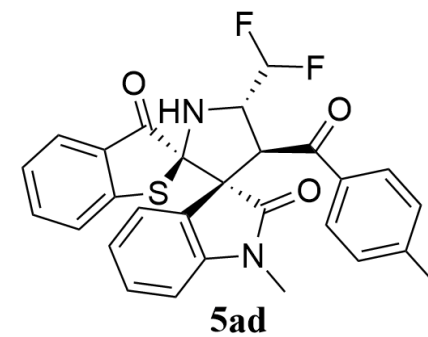

$^{13}\text{C} \{^1\text{H}\}$  NMR (101 MHz,  $\text{CDCl}_3$ )

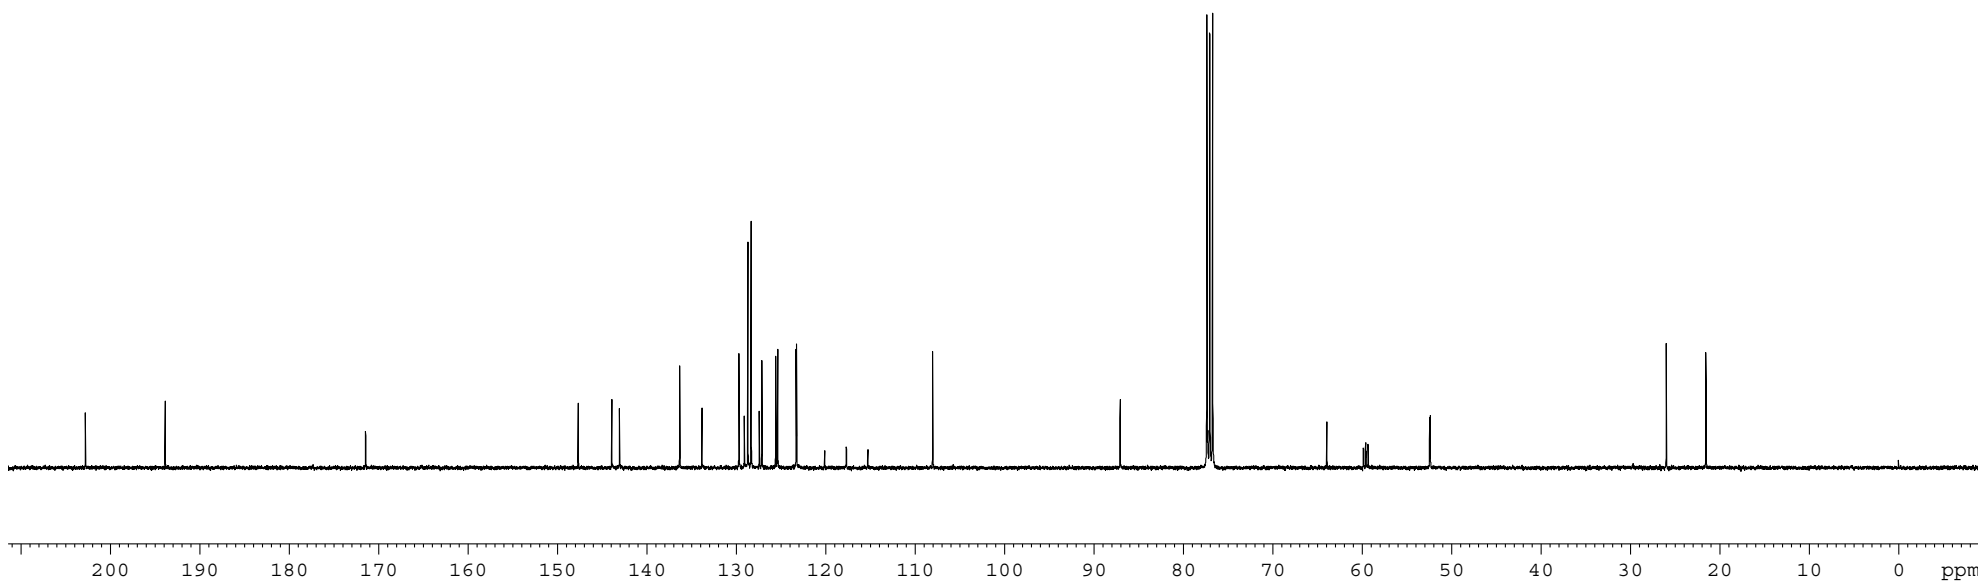

— -118.518

— -119.304

— -123.010

— -123.796

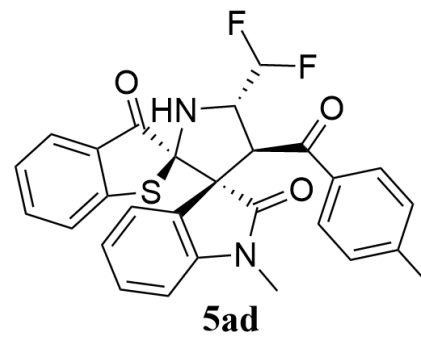

<sup>19</sup>F NMR (376 MHz, CDCl<sub>3</sub>)

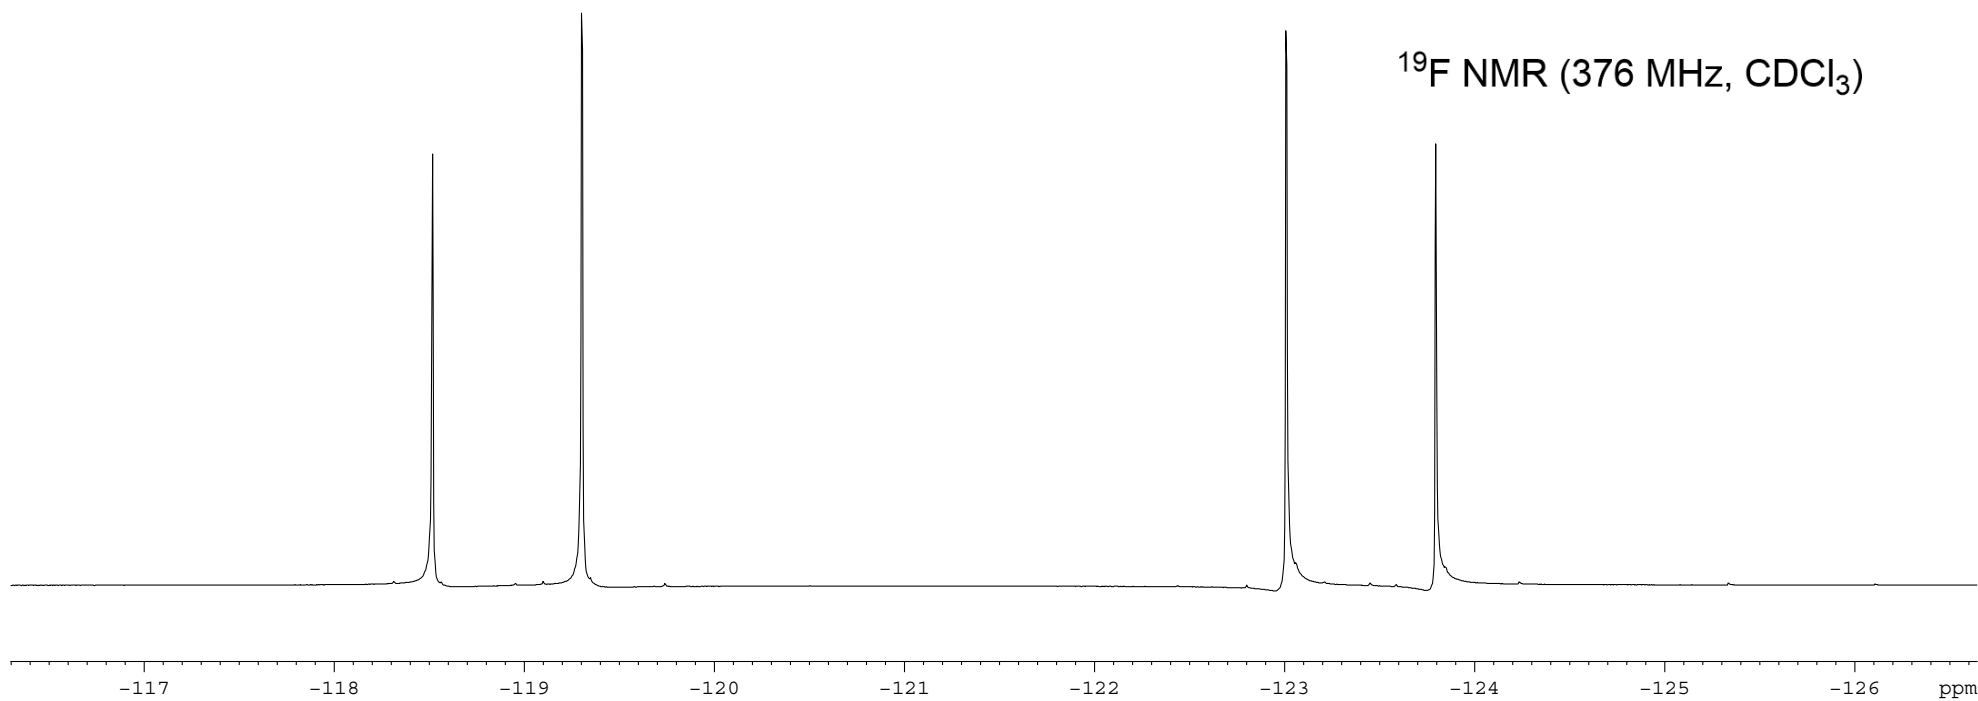

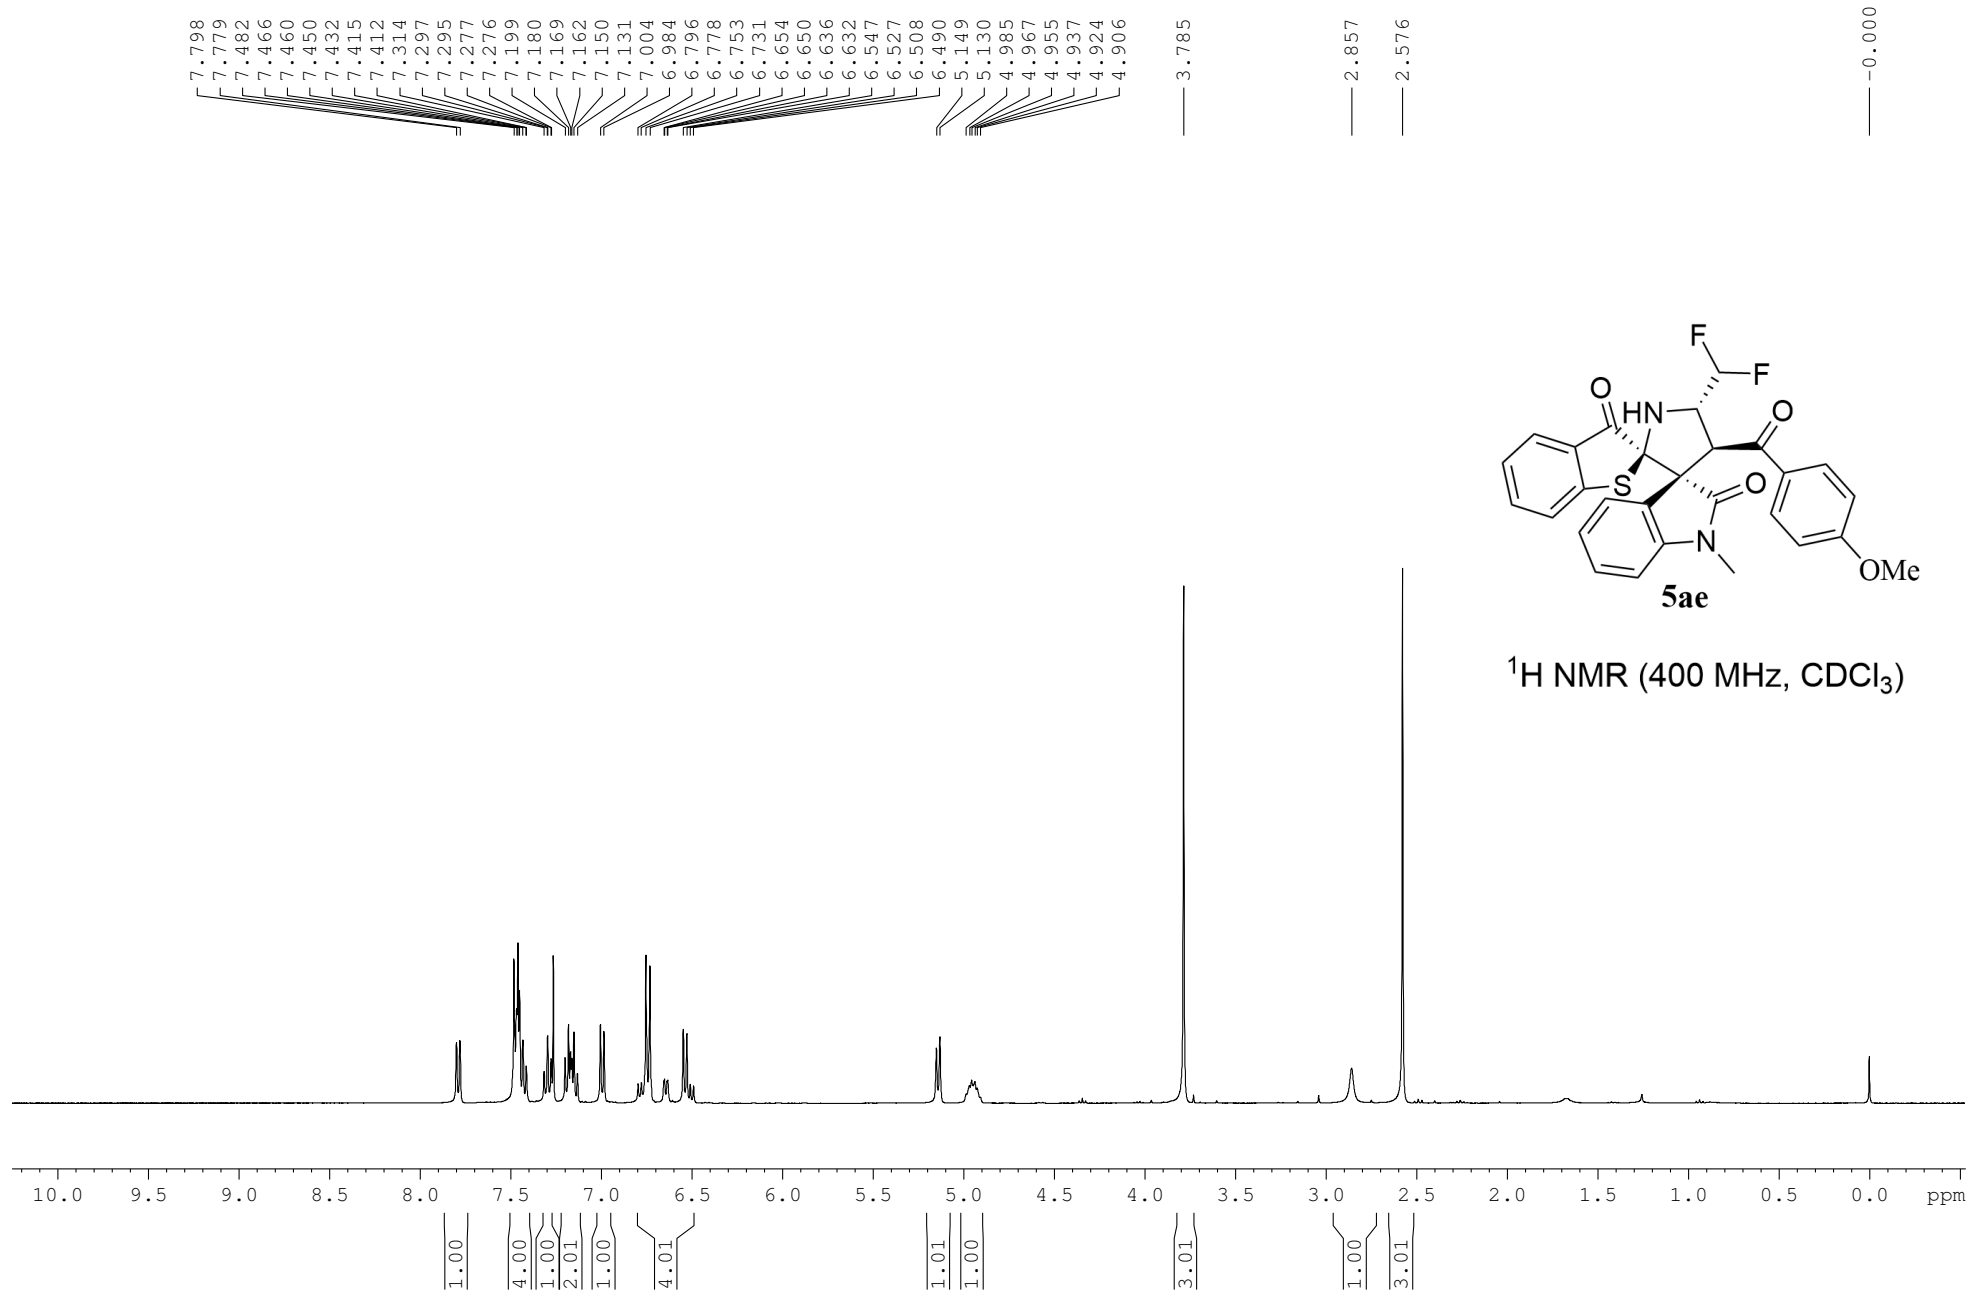

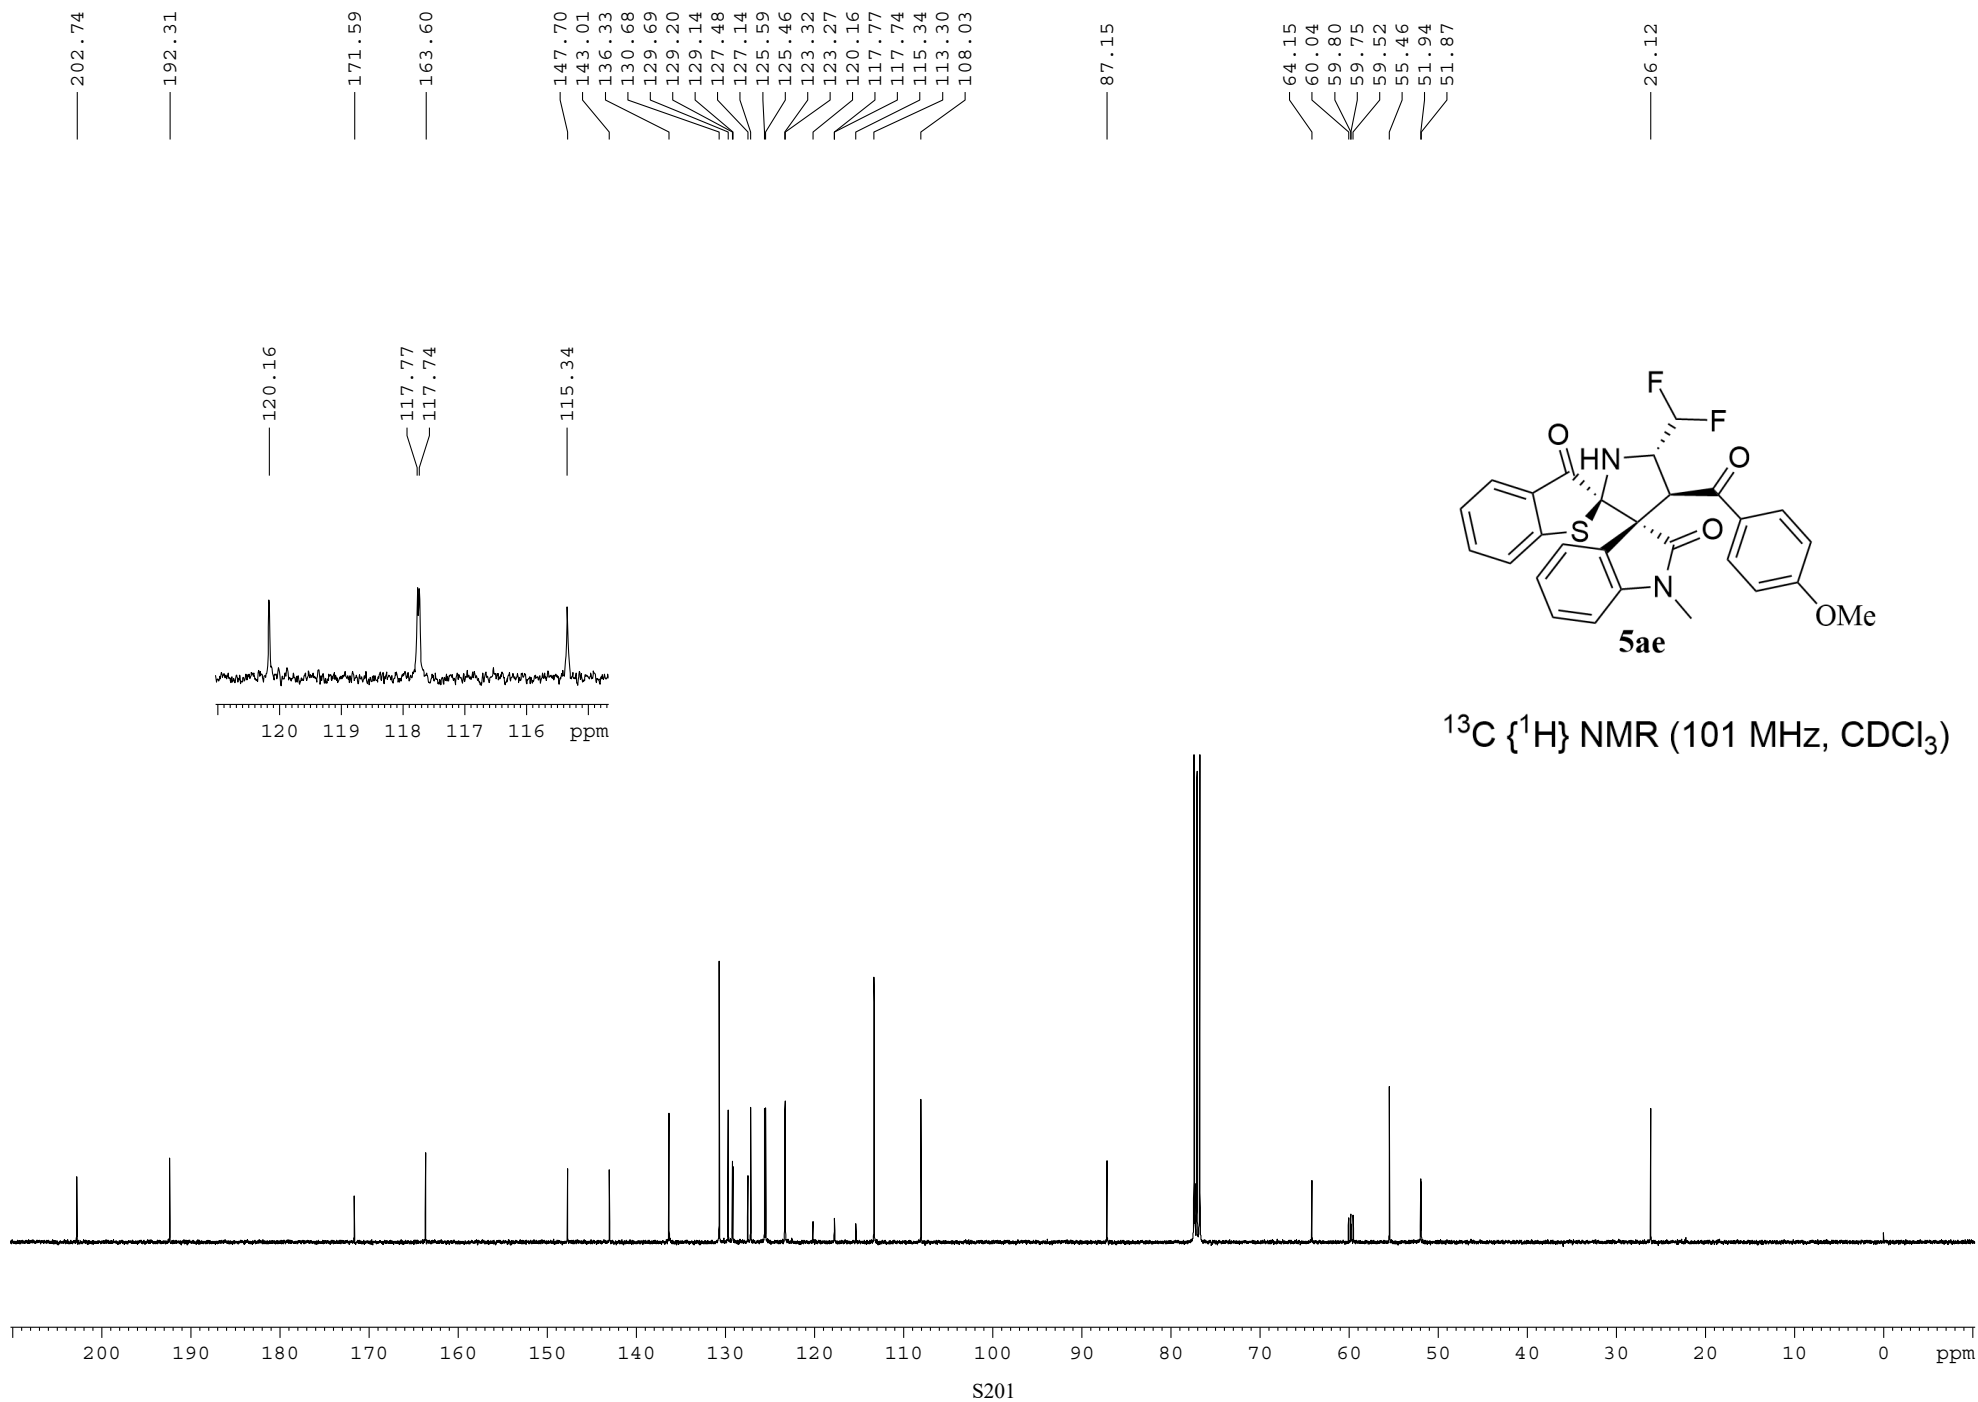

— 202.74

— 192.31

— 171.59

— 163.60

— 147.70

— 143.01

— 136.33

— 130.68

— 129.69

— 129.20

— 129.14

— 127.48

— 127.14

— 125.59

— 125.46

— 123.32

— 123.27

— 120.16

— 117.77

— 117.74

— 115.34

— 113.30

— 108.03

— 87.15

— 64.15

— 60.04

— 59.80

— 59.75

— 59.52

— 55.46

— 51.94

— 51.87

— 26.12

— 120.16

— 117.77

— 117.74

— 115.34

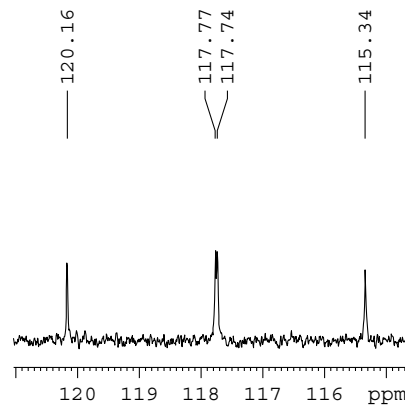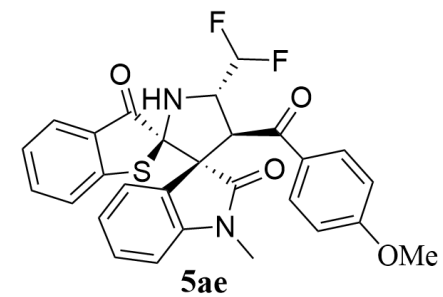

$^{13}\text{C}$  { $^1\text{H}$ } NMR (101 MHz,  $\text{CDCl}_3$ )

-118.458

-119.244

-122.991

-123.776

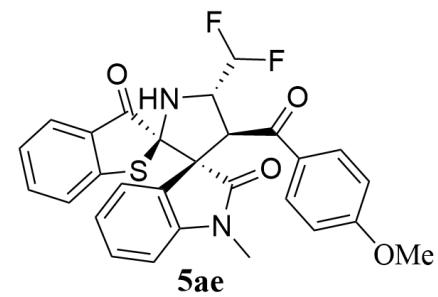

<sup>19</sup>F NMR (376 MHz, CDCl<sub>3</sub>)

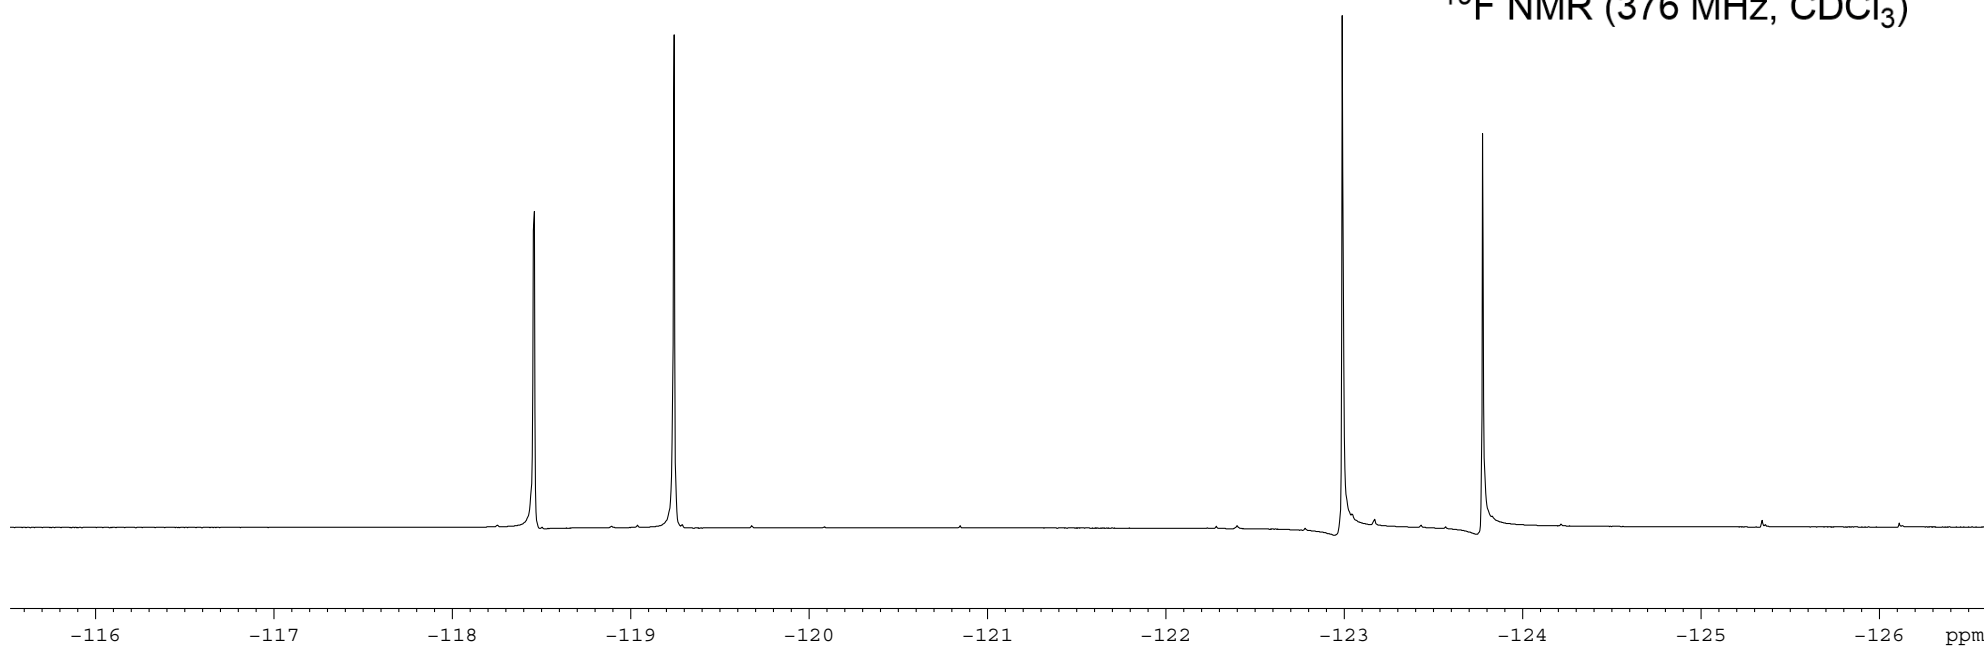

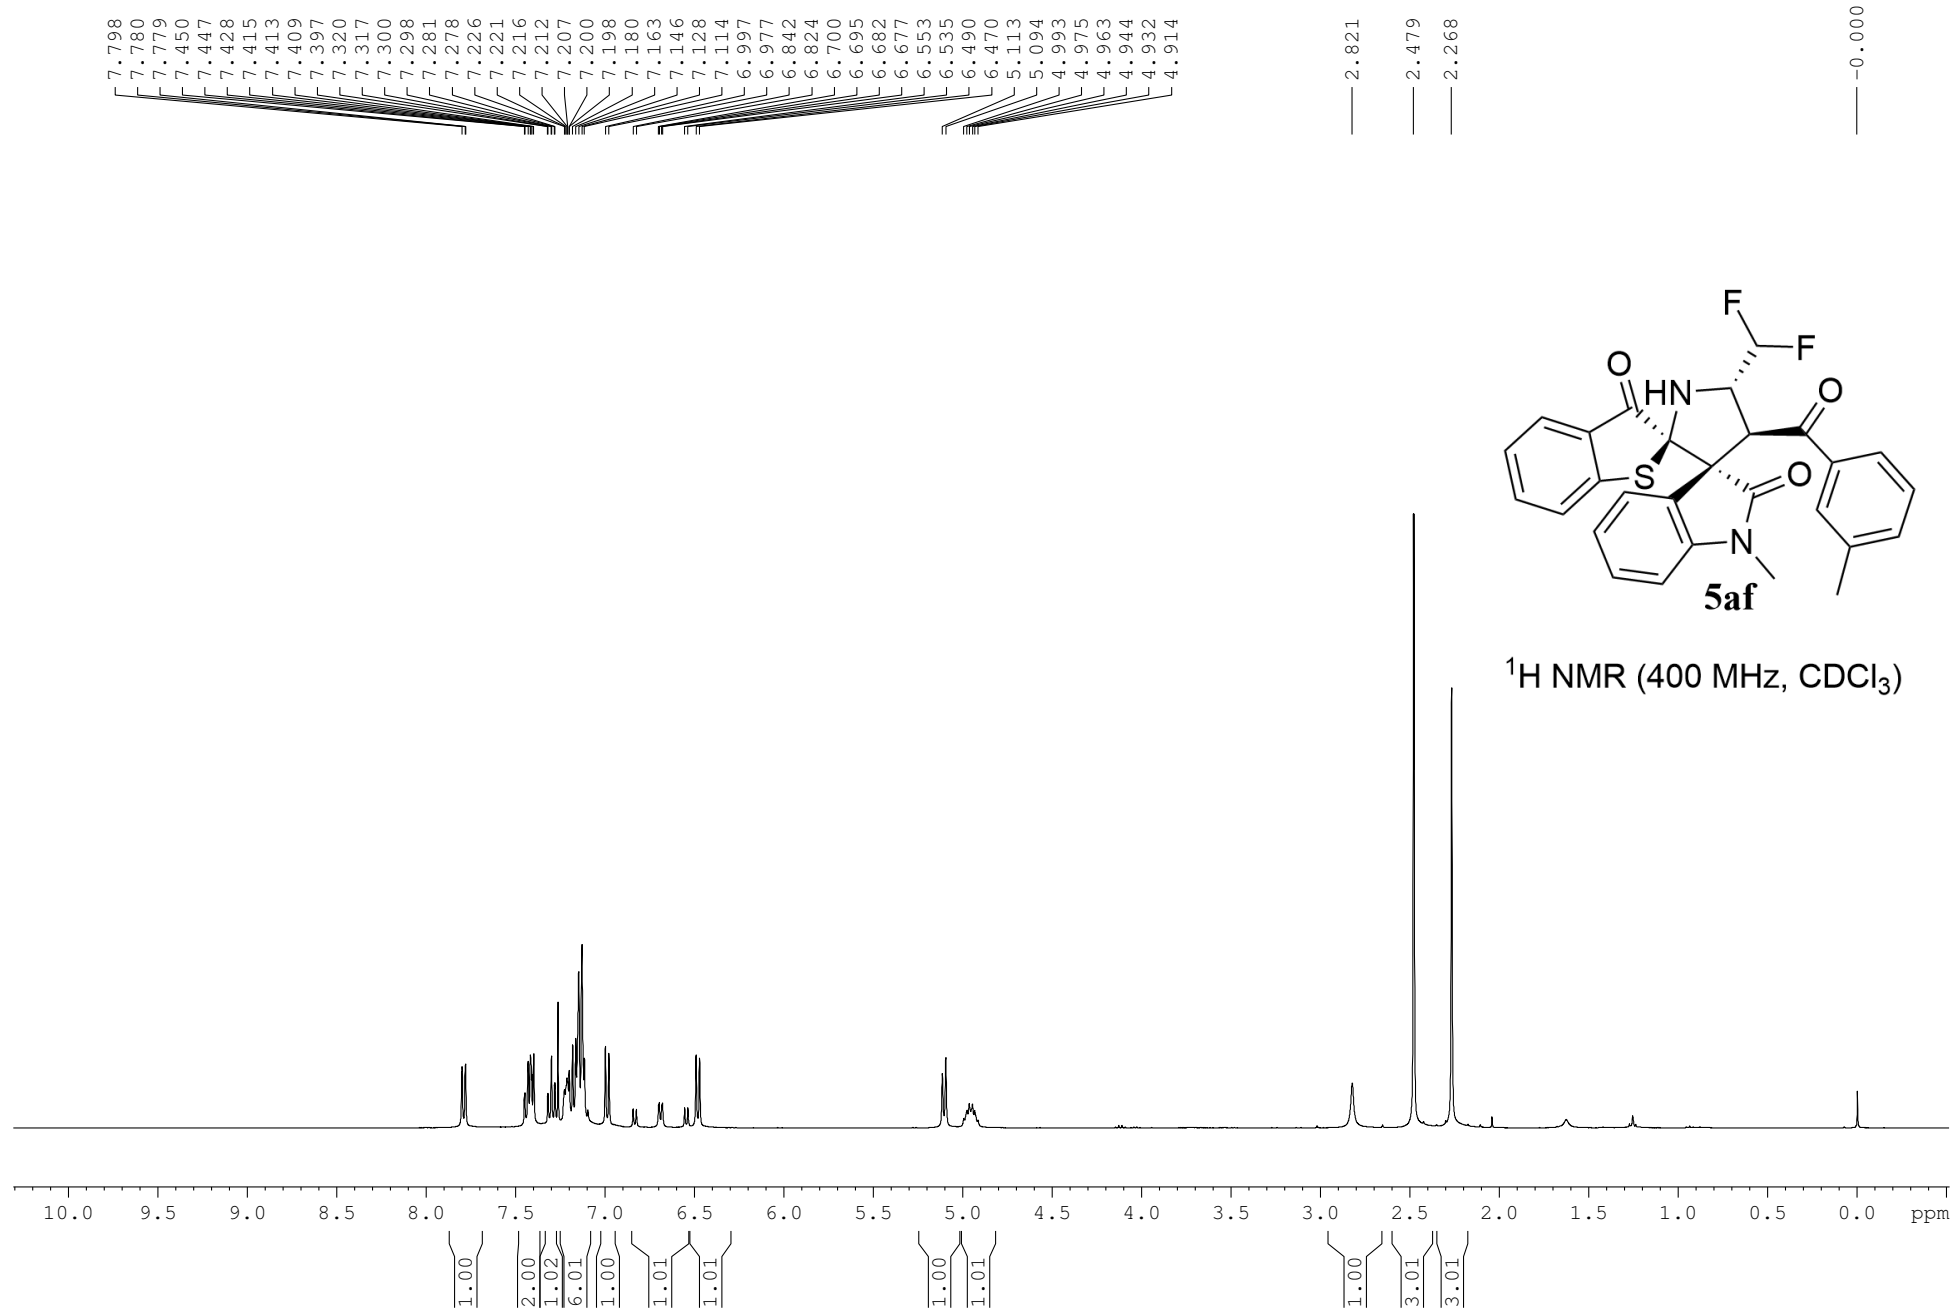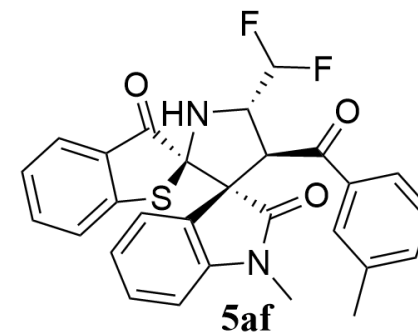

<sup>1</sup>H NMR (400 MHz, CDCl<sub>3</sub>)

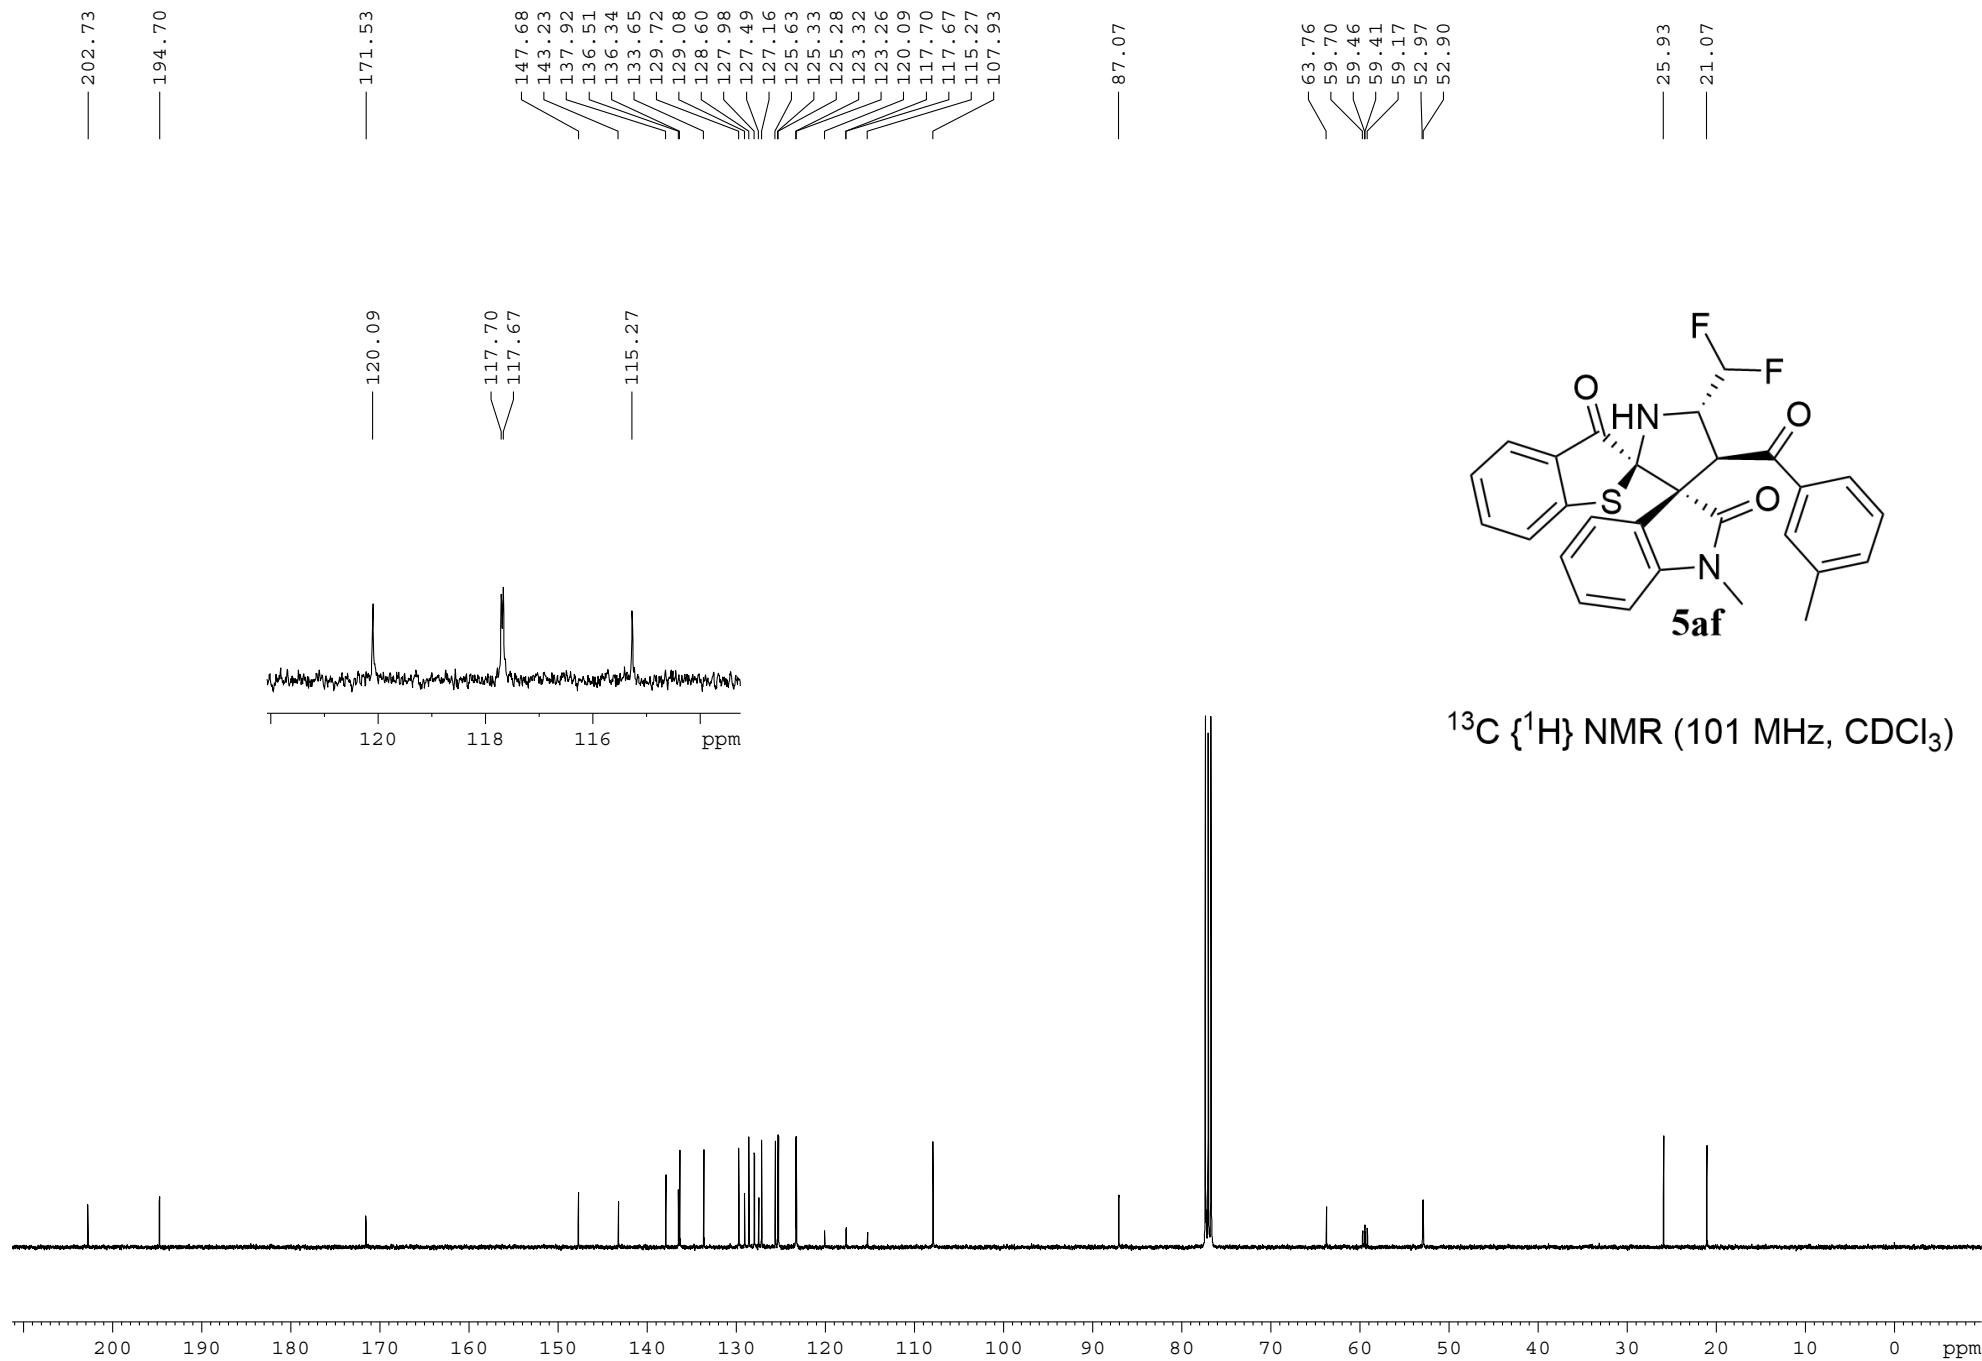



— -118.546

— -119.332

— -123.064

— -123.851

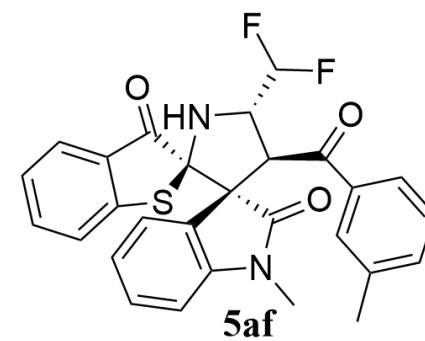

<sup>19</sup>F NMR (376 MHz, CDCl<sub>3</sub>)

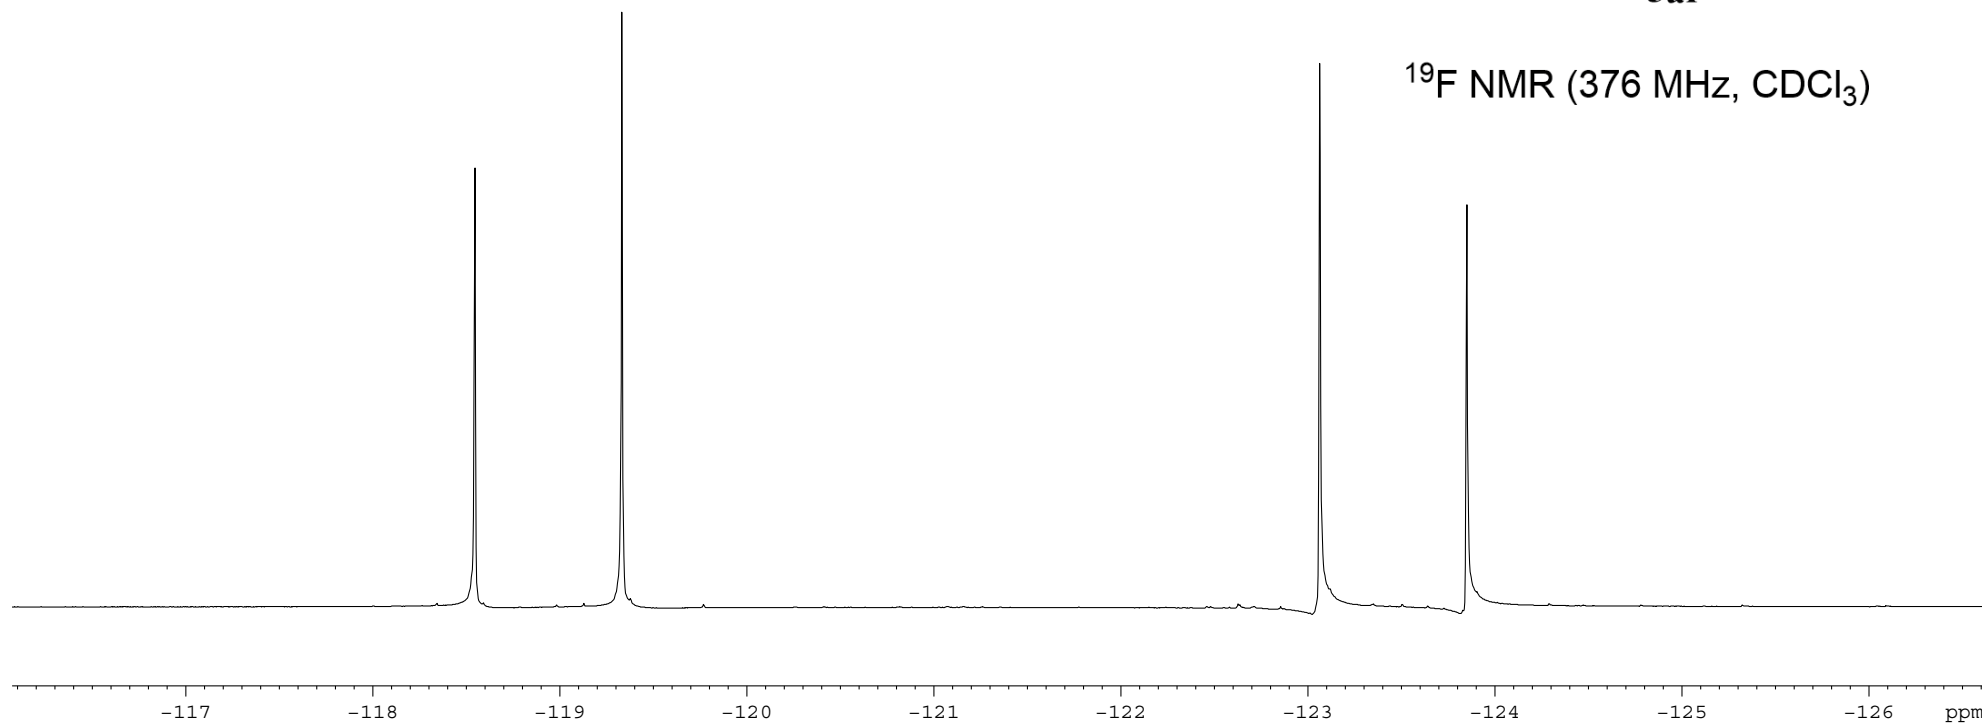

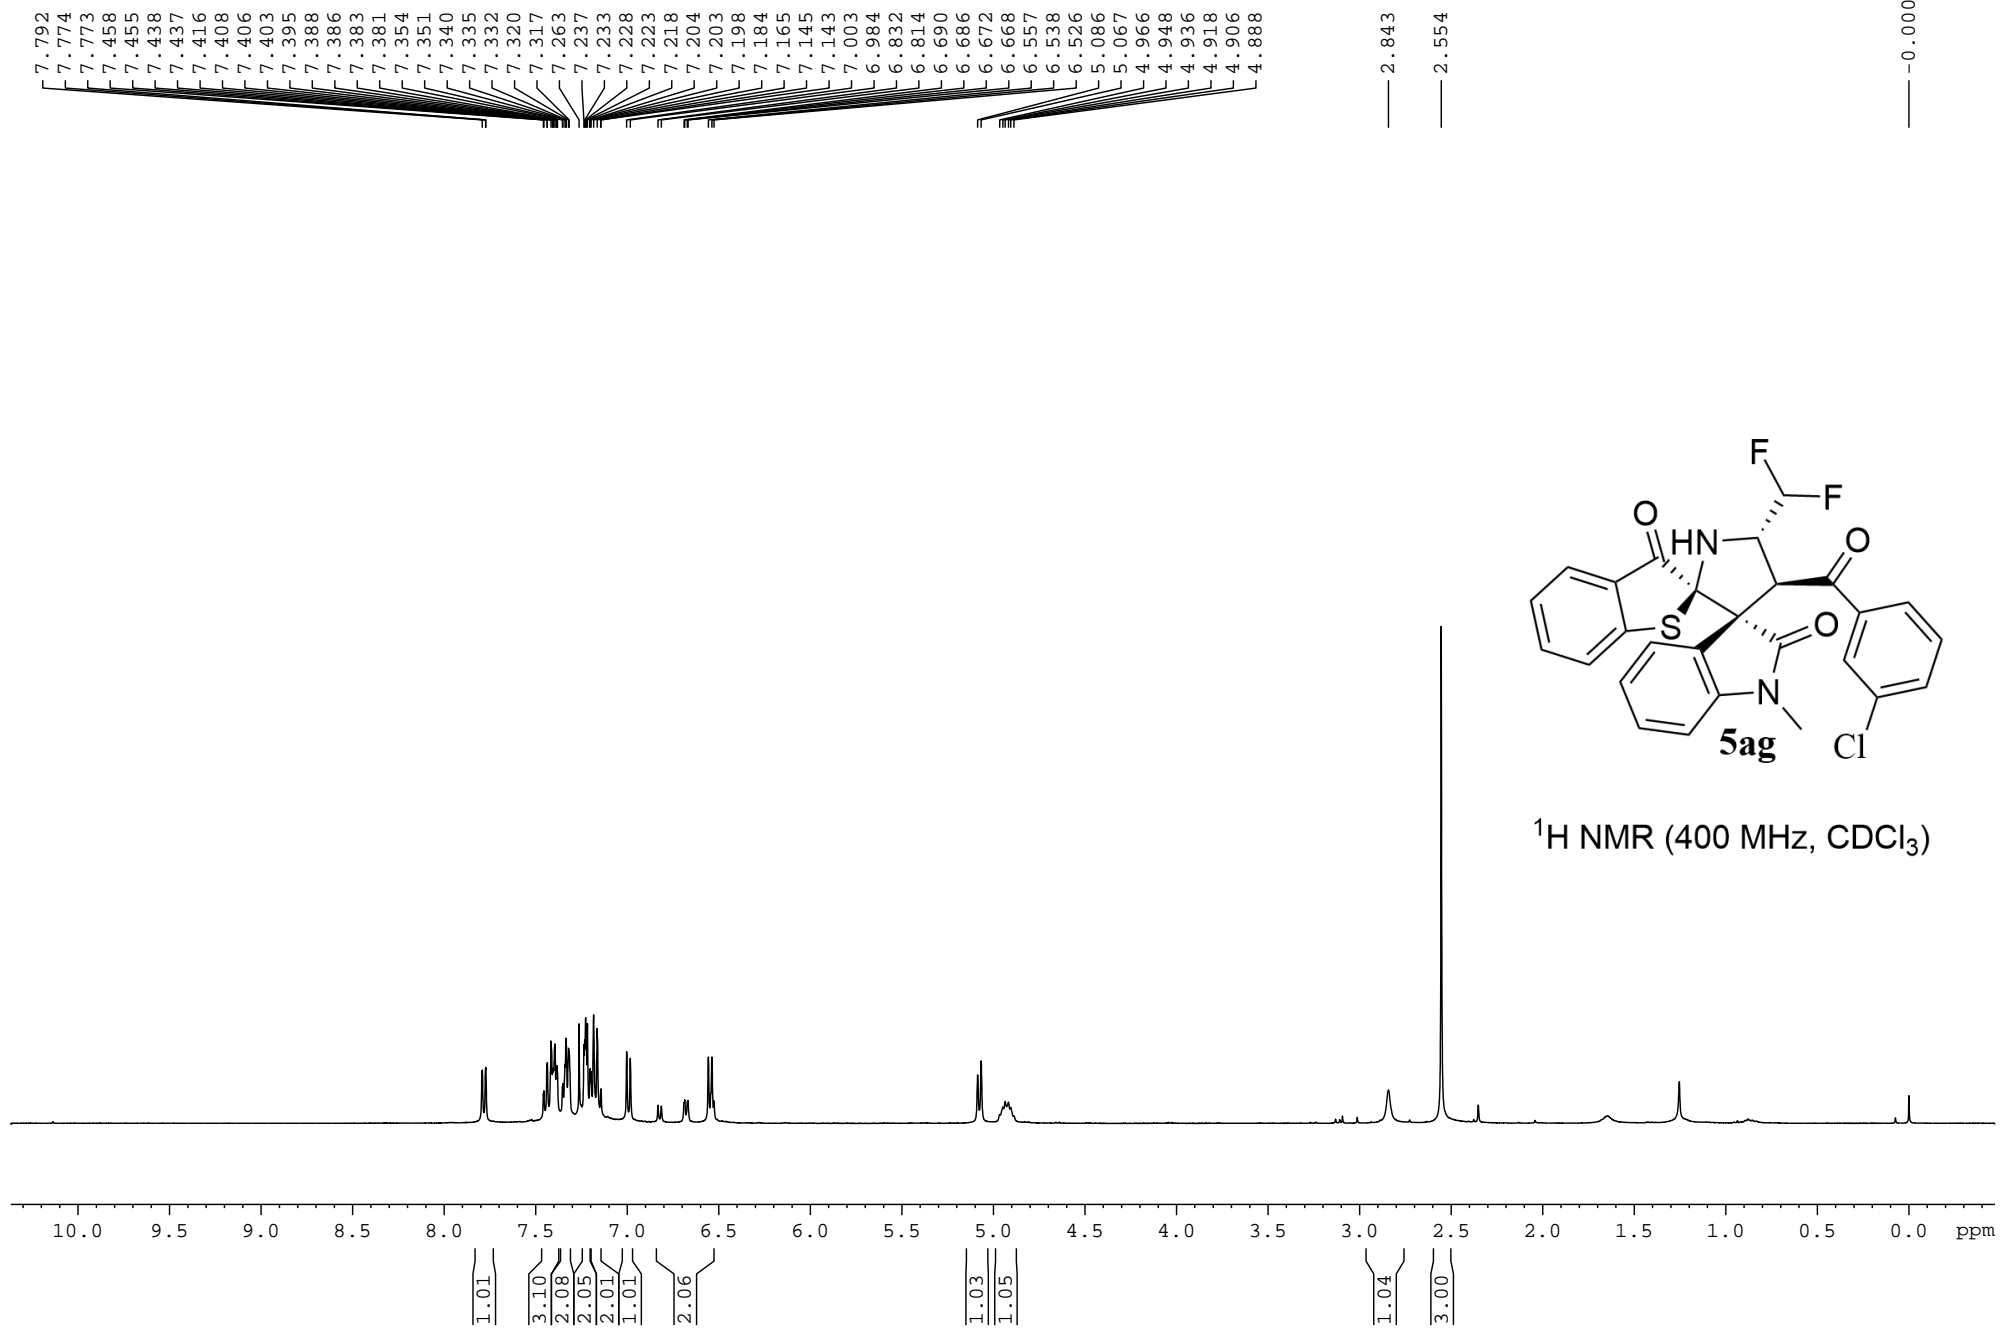

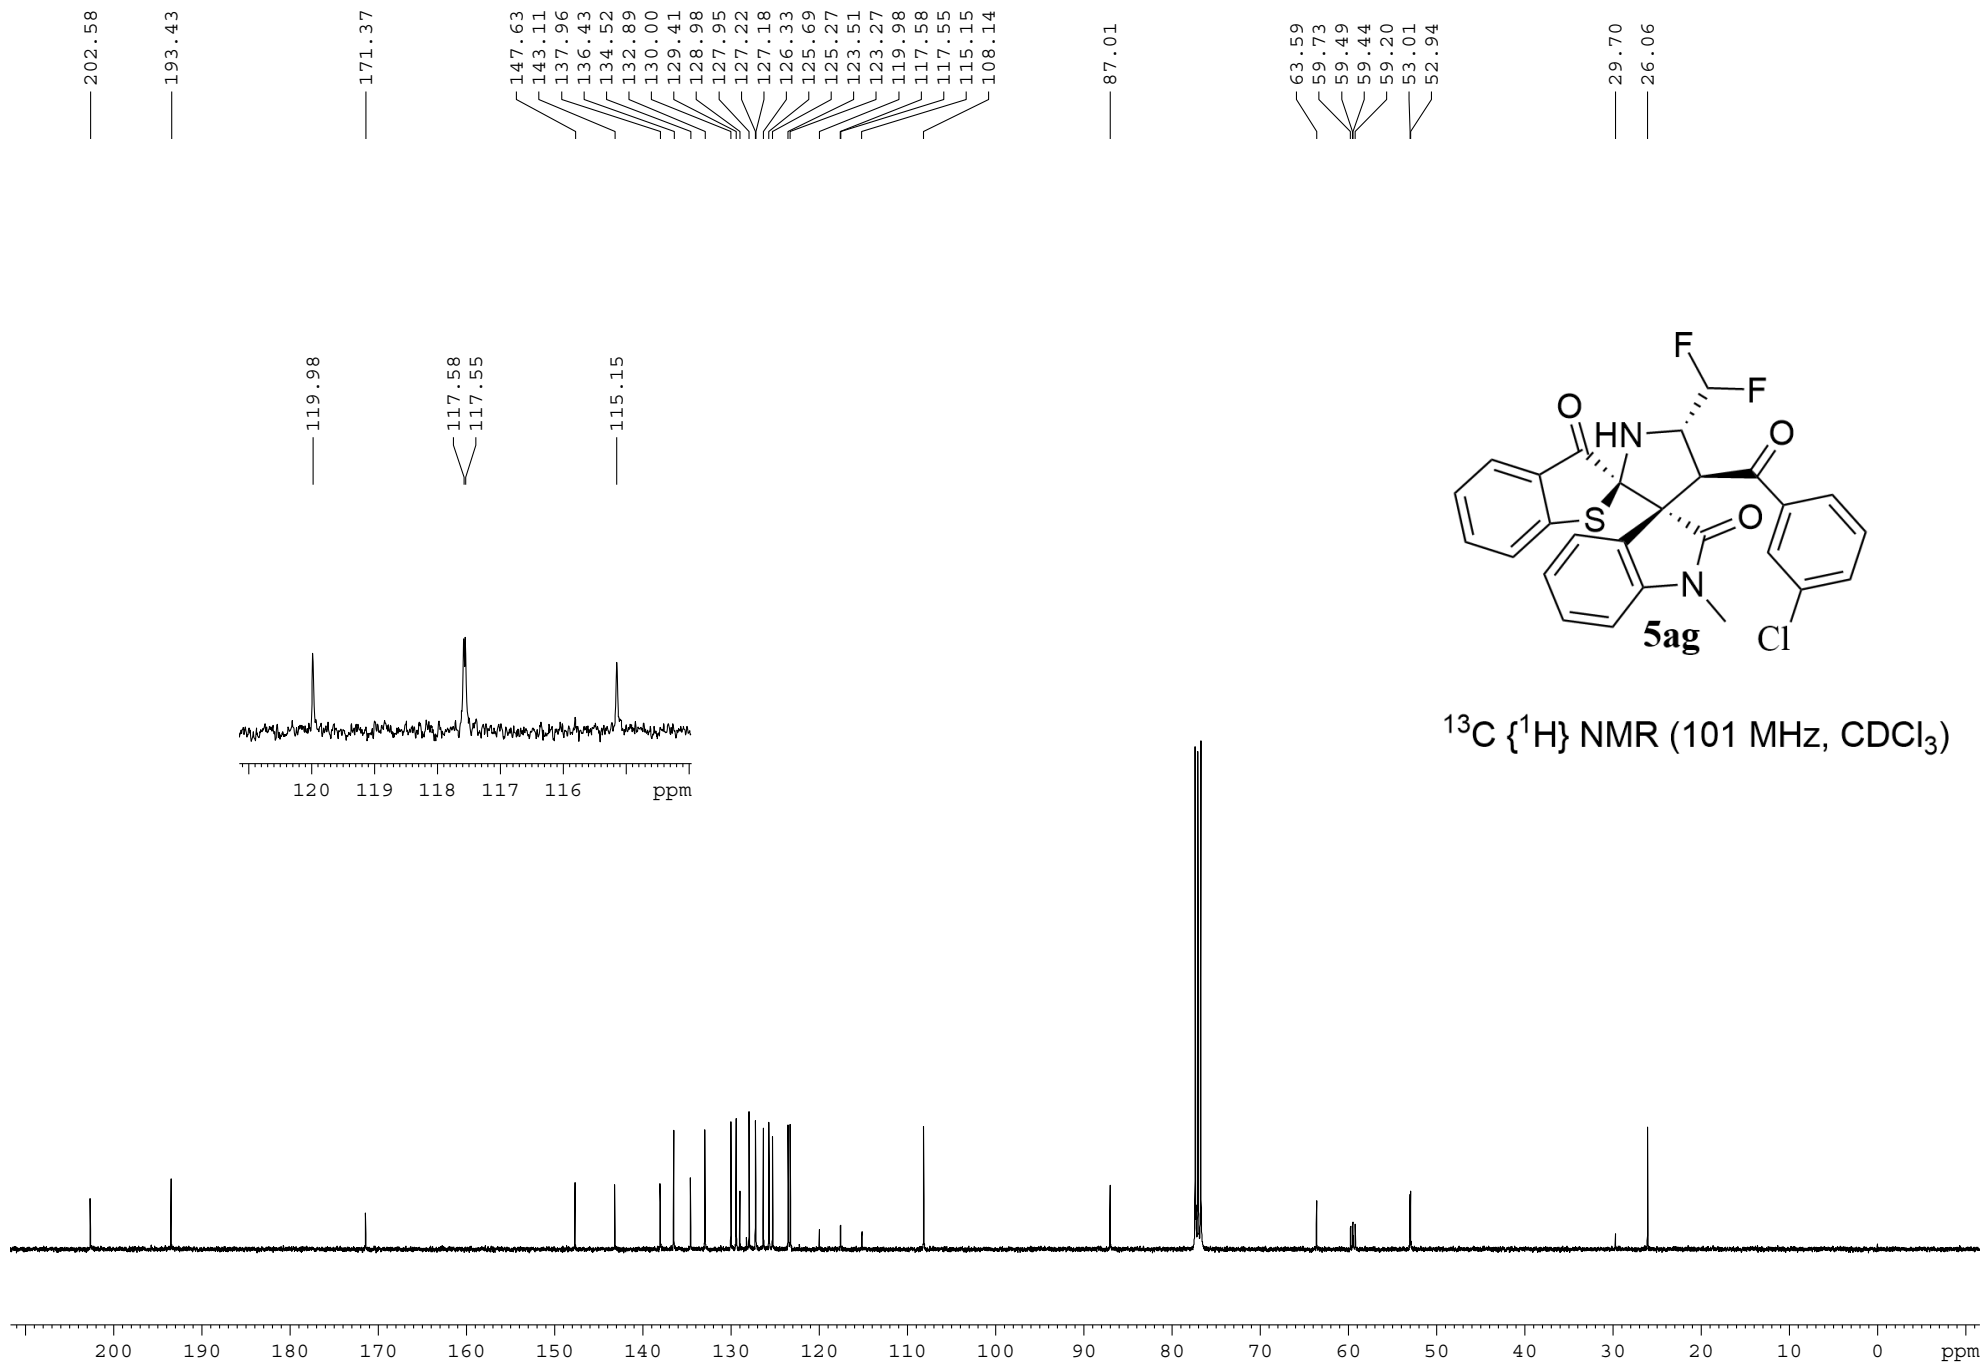

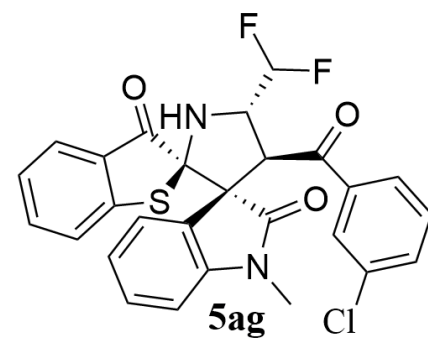

<sup>19</sup>F NMR (376 MHz, CDCl<sub>3</sub>)

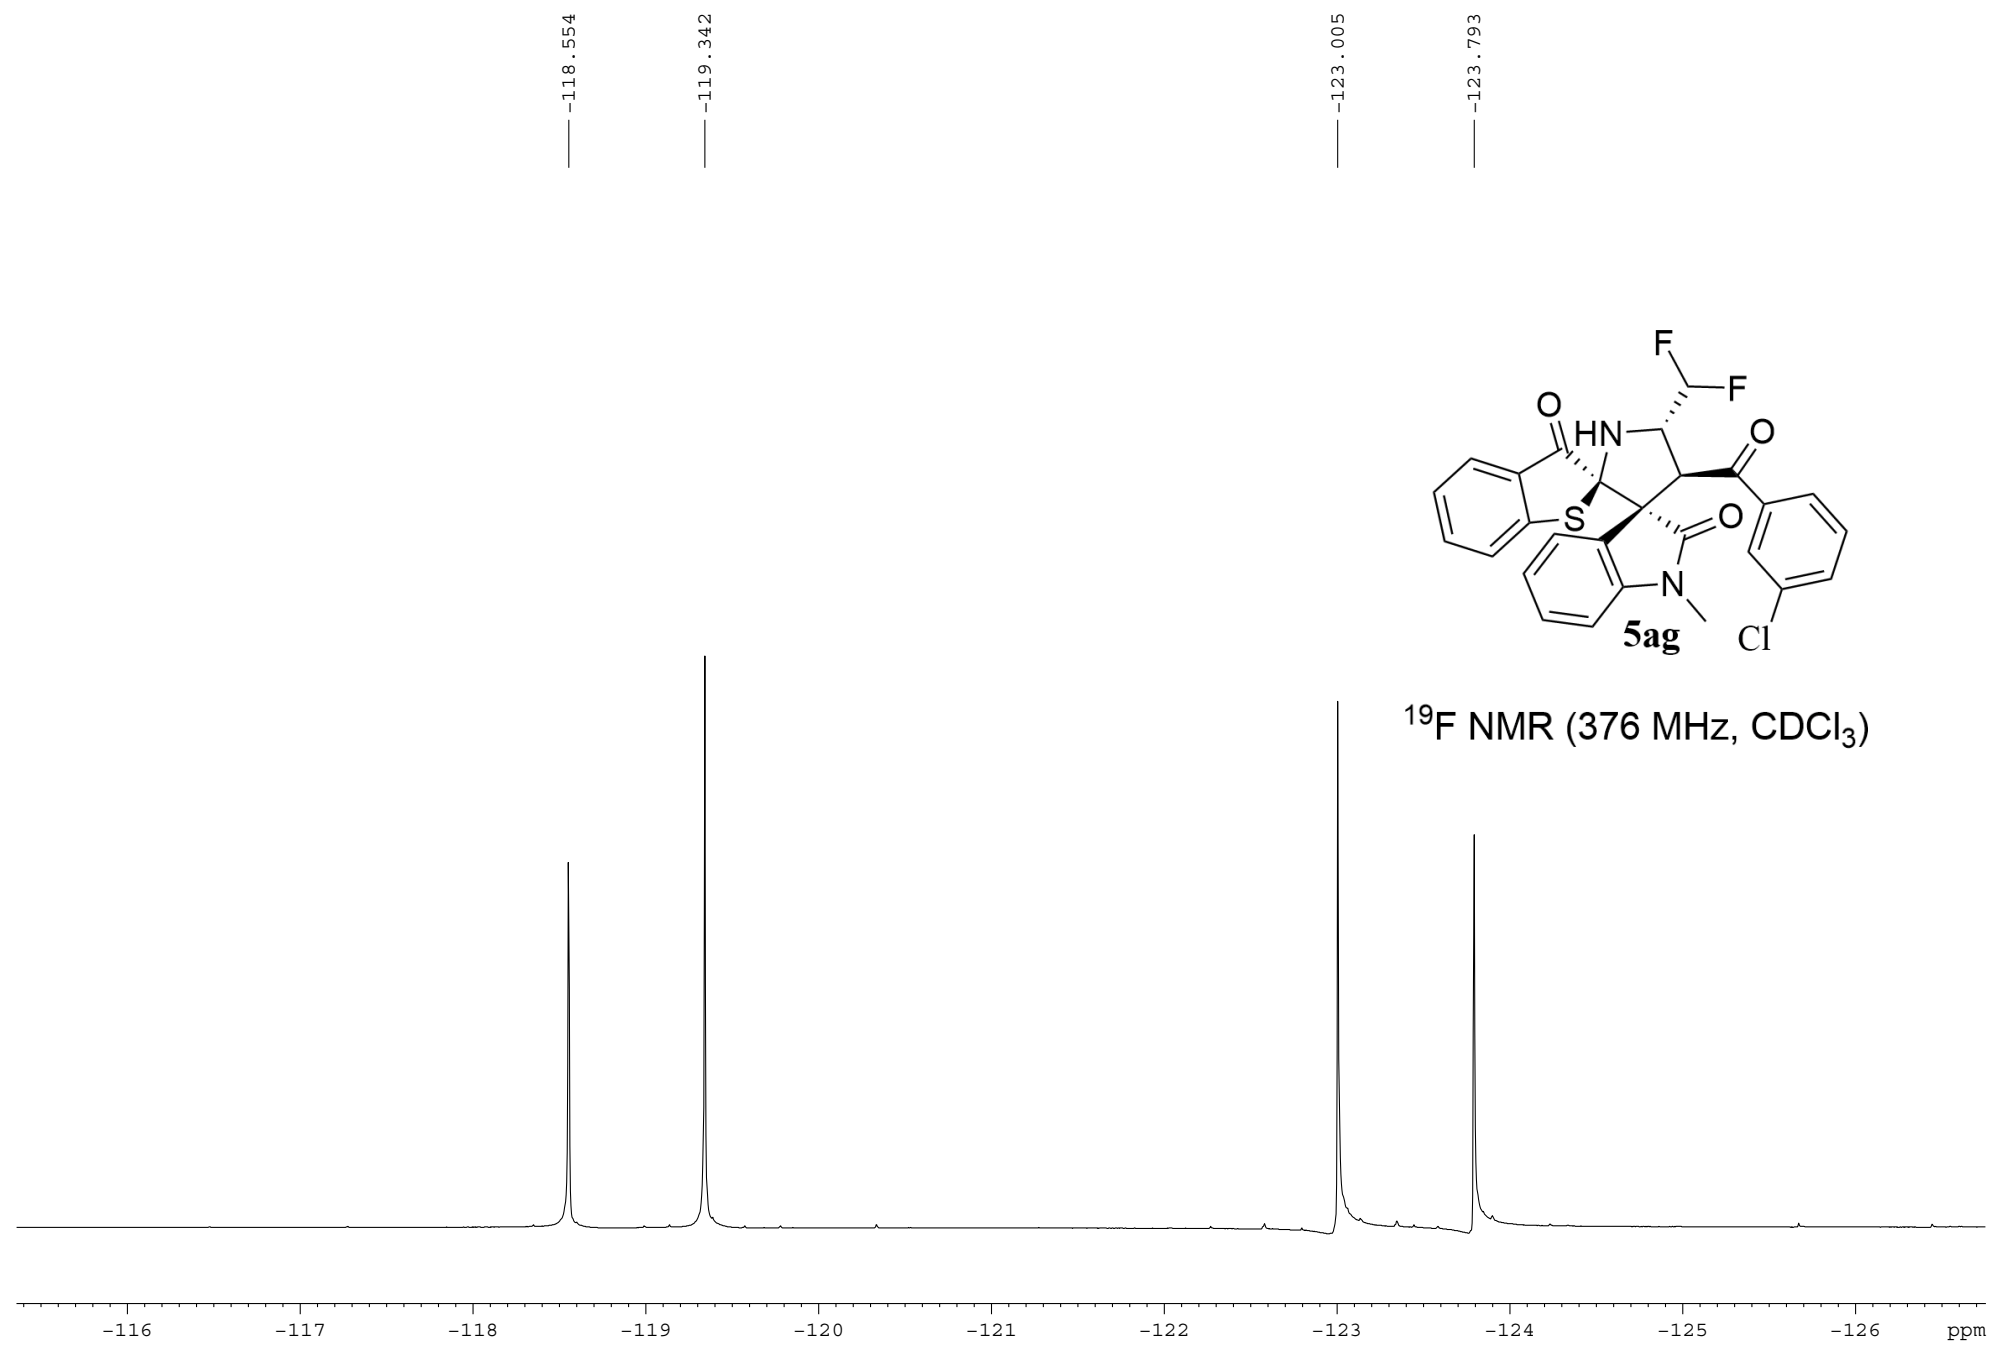

7.822  
7.804  
7.803  
7.763  
7.743  
7.621  
7.599  
7.568  
7.565  
7.550  
7.548  
7.531  
7.527  
7.509  
7.507  
7.489  
7.472  
7.469  
7.450  
7.440  
7.433  
7.421  
7.420  
7.403  
7.400  
7.290  
7.288  
7.278  
7.273  
7.271  
7.269  
7.252  
7.201  
7.182  
7.160  
7.141  
7.139  
6.983  
6.963  
6.904  
6.886  
6.762  
6.757  
6.744  
6.739  
6.615  
6.597  
6.356  
6.337  
5.271  
5.290  
5.042  
5.028

— 2.866

— 2.112

— 0.000

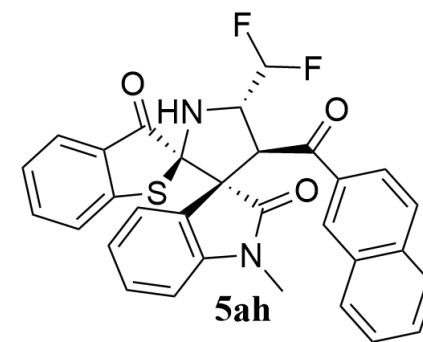

<sup>1</sup>H NMR (400 MHz, CDCl<sub>3</sub>)

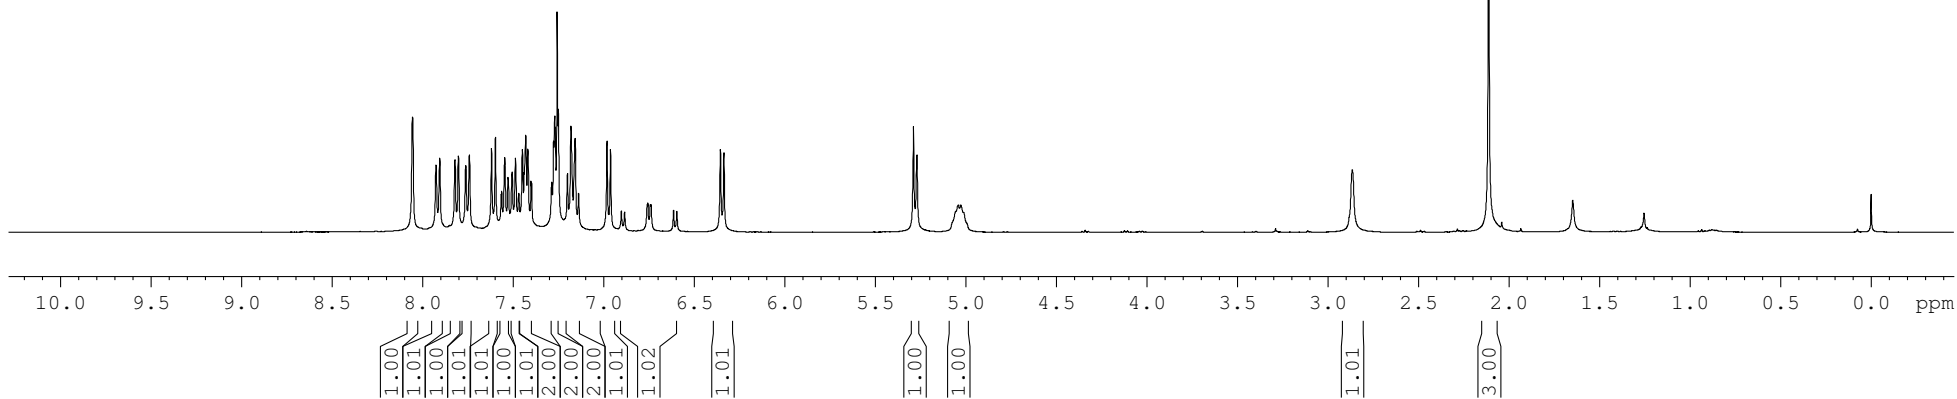

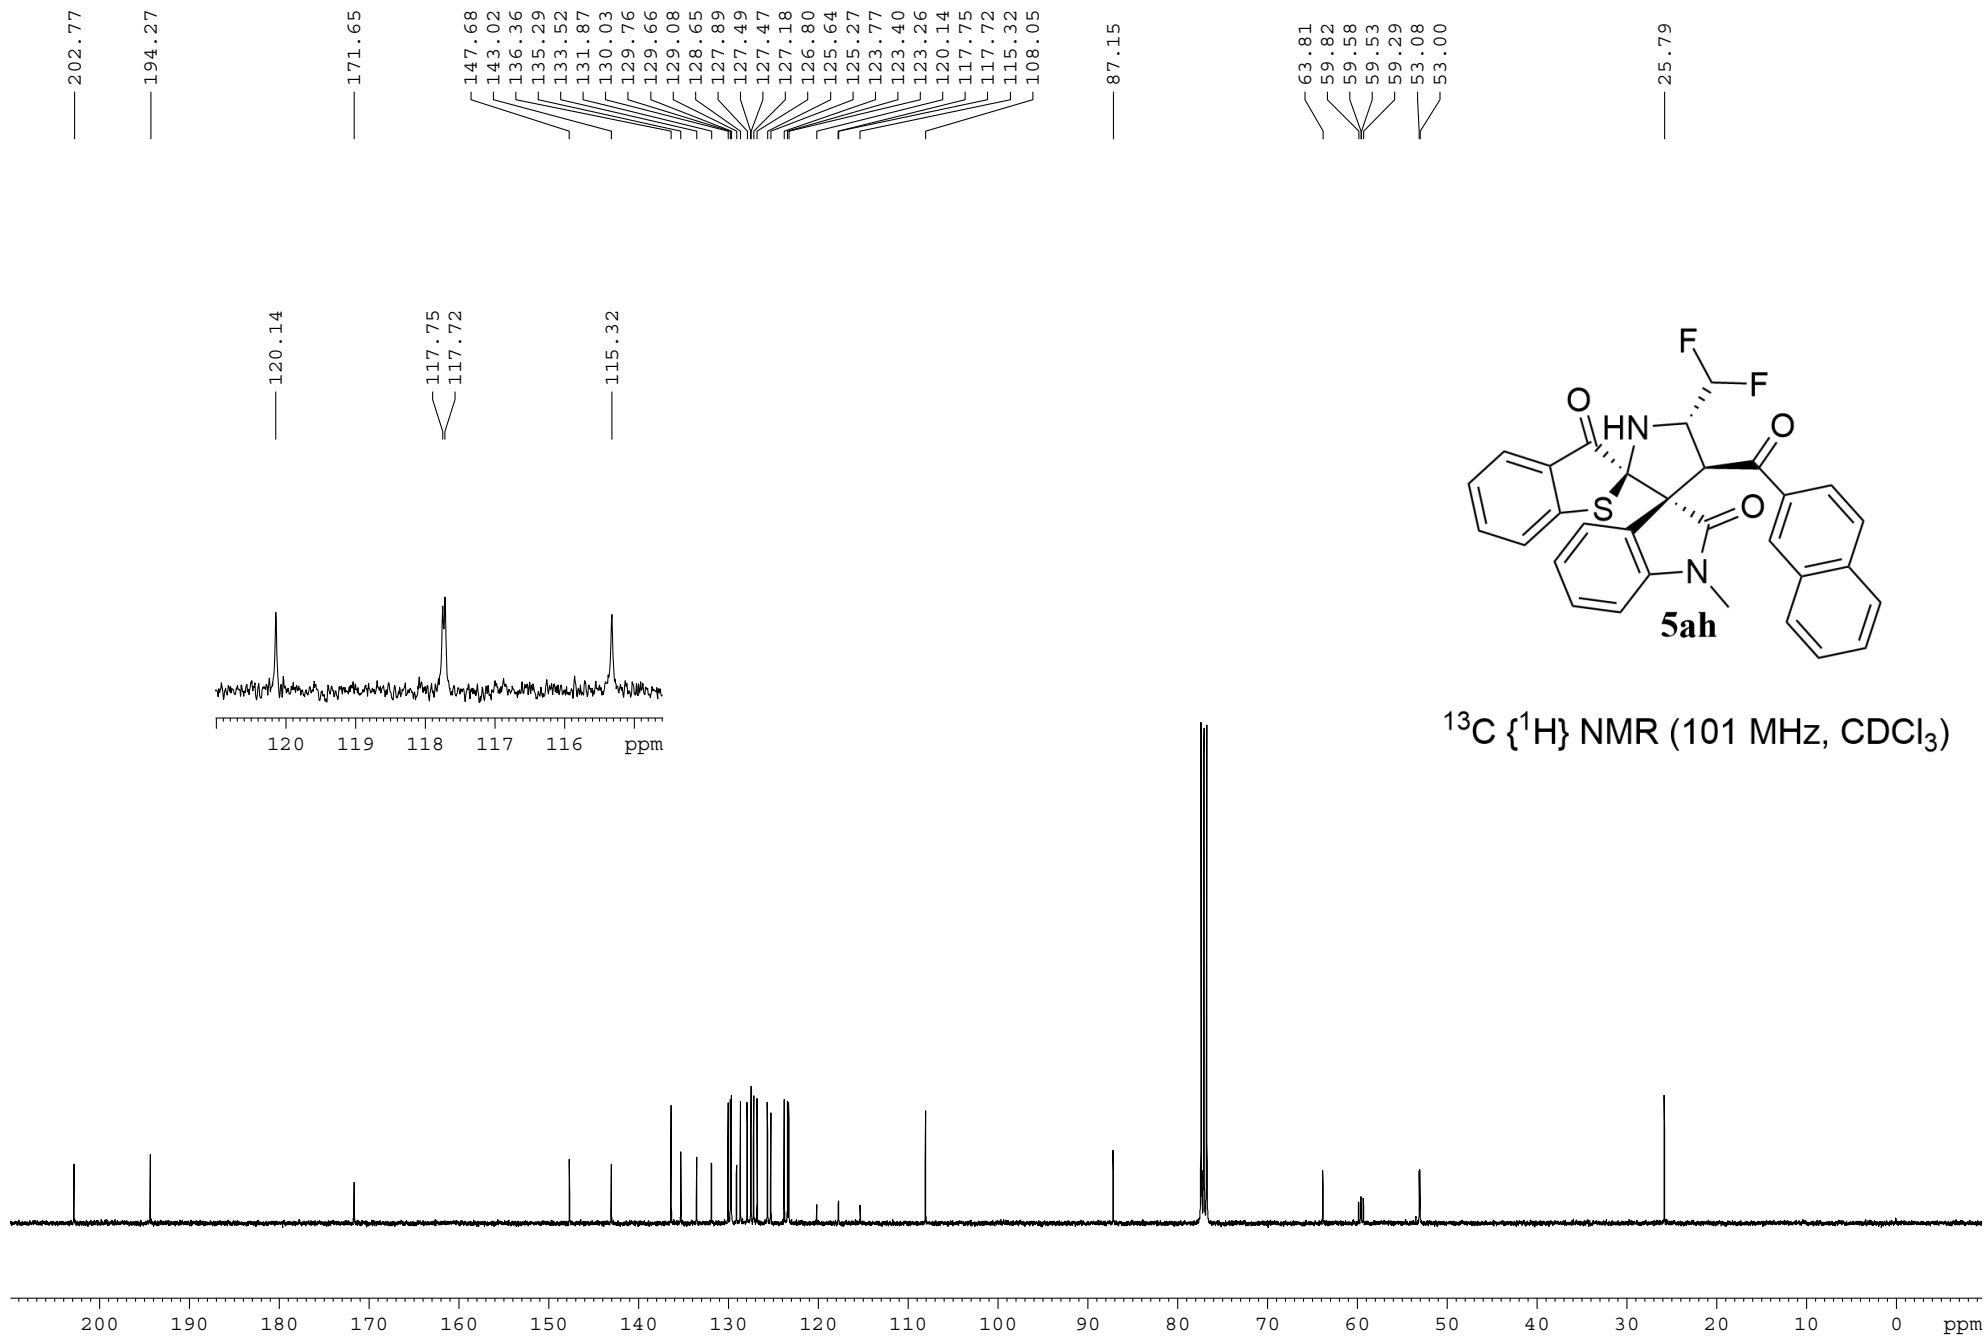

-118.459

-119.245

-122.976

-123.762

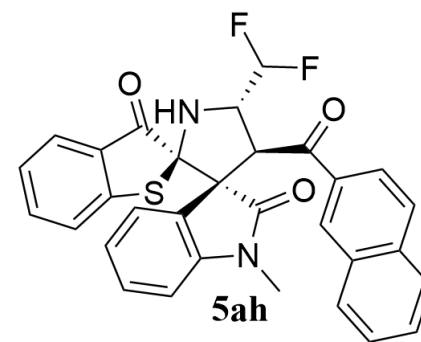

<sup>19</sup>F NMR (376 MHz, CDCl<sub>3</sub>)

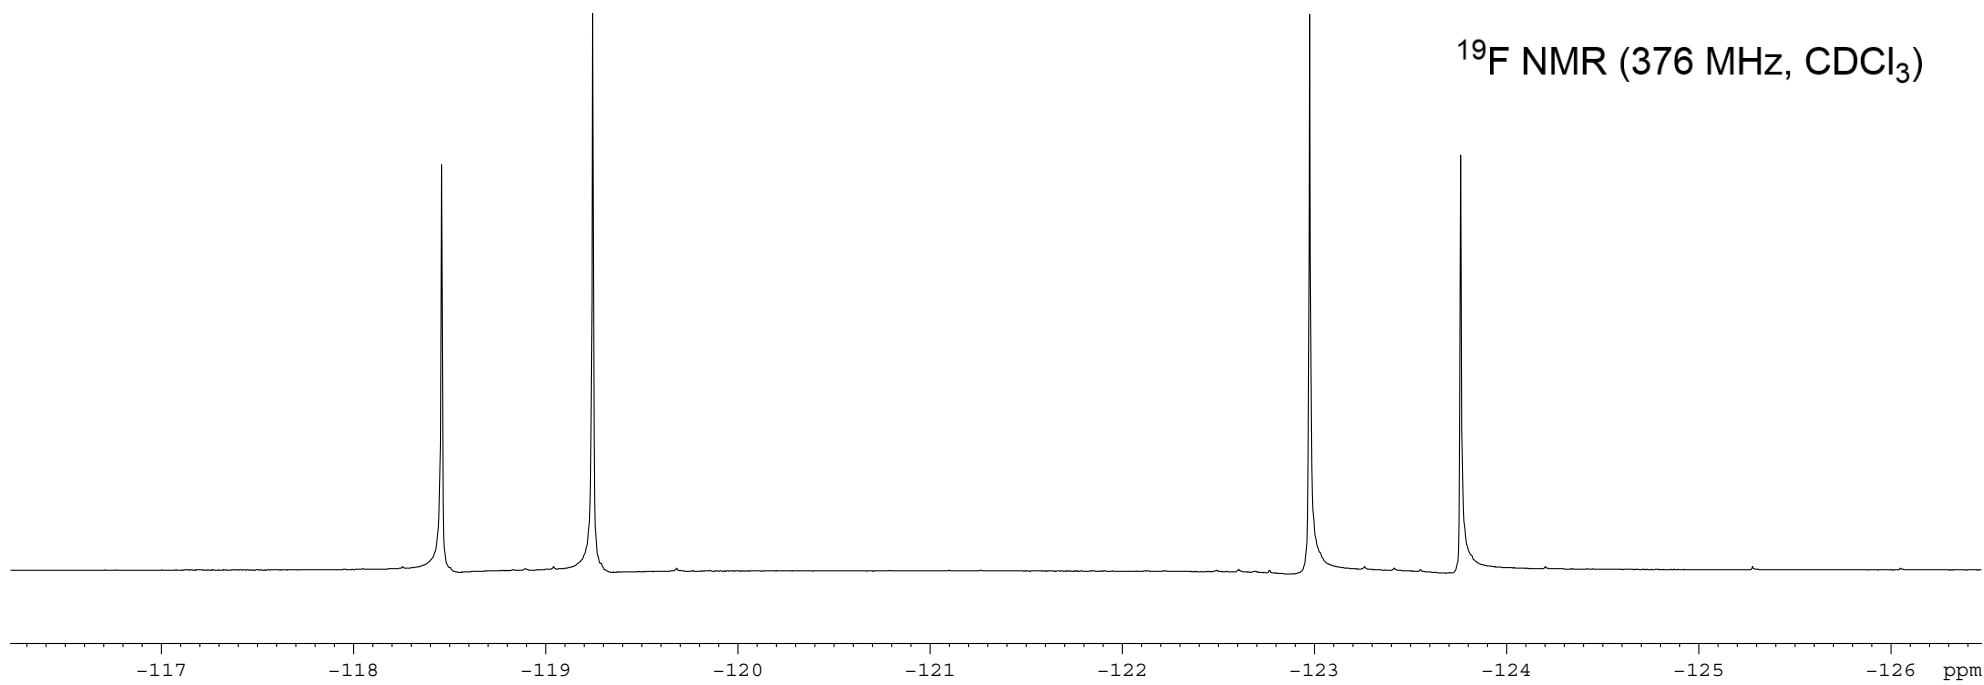

7.801  
7.799  
7.781  
7.780  
7.680  
7.678  
7.670  
7.668  
7.537  
7.535  
7.525  
7.522  
7.508  
7.491  
7.490  
7.467  
7.464  
7.447  
7.446  
7.429  
7.426  
7.341  
7.338  
7.322  
7.319  
7.302  
7.300  
7.210  
7.209  
7.191  
7.173  
7.171  
7.154  
7.152  
7.022  
7.016  
7.003  
6.993  
6.765  
6.747  
6.637  
6.618  
6.606  
6.601  
6.477  
6.459  
5.072  
5.052  
4.946  
4.928  
4.916  
4.904  
4.897  
4.885  
4.866

2.879  
2.733

0.000

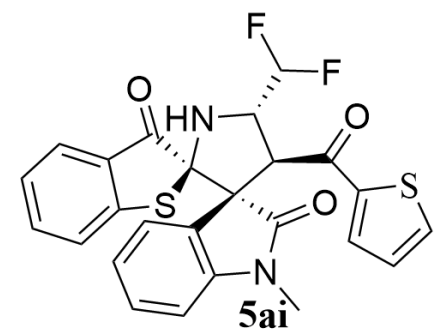

<sup>1</sup>H NMR (400 MHz, CDCl<sub>3</sub>)

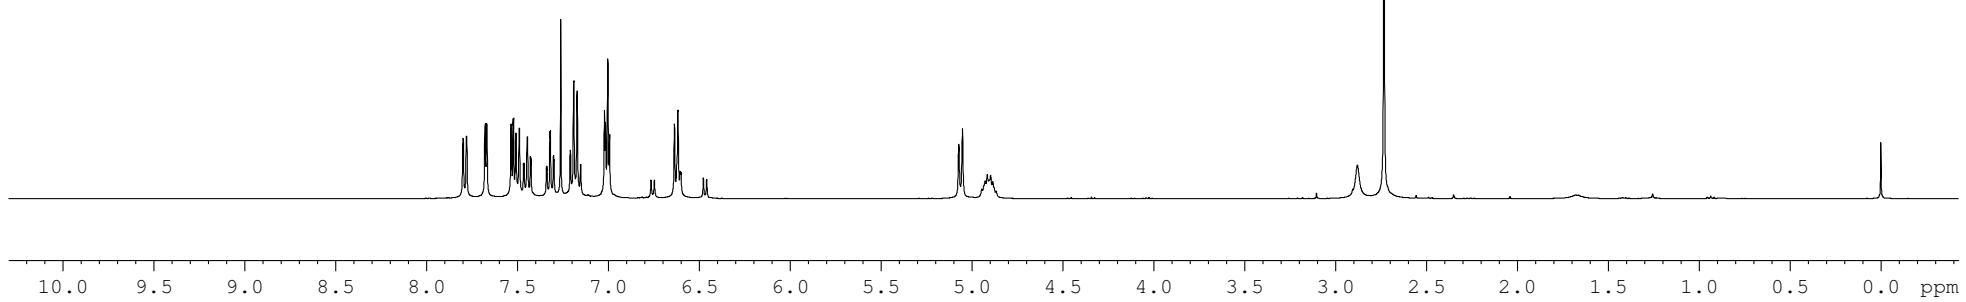

1.01  
1.02  
3.00  
1.01  
2.00  
2.00  
2.01

1.00  
1.01

1.01  
3.00



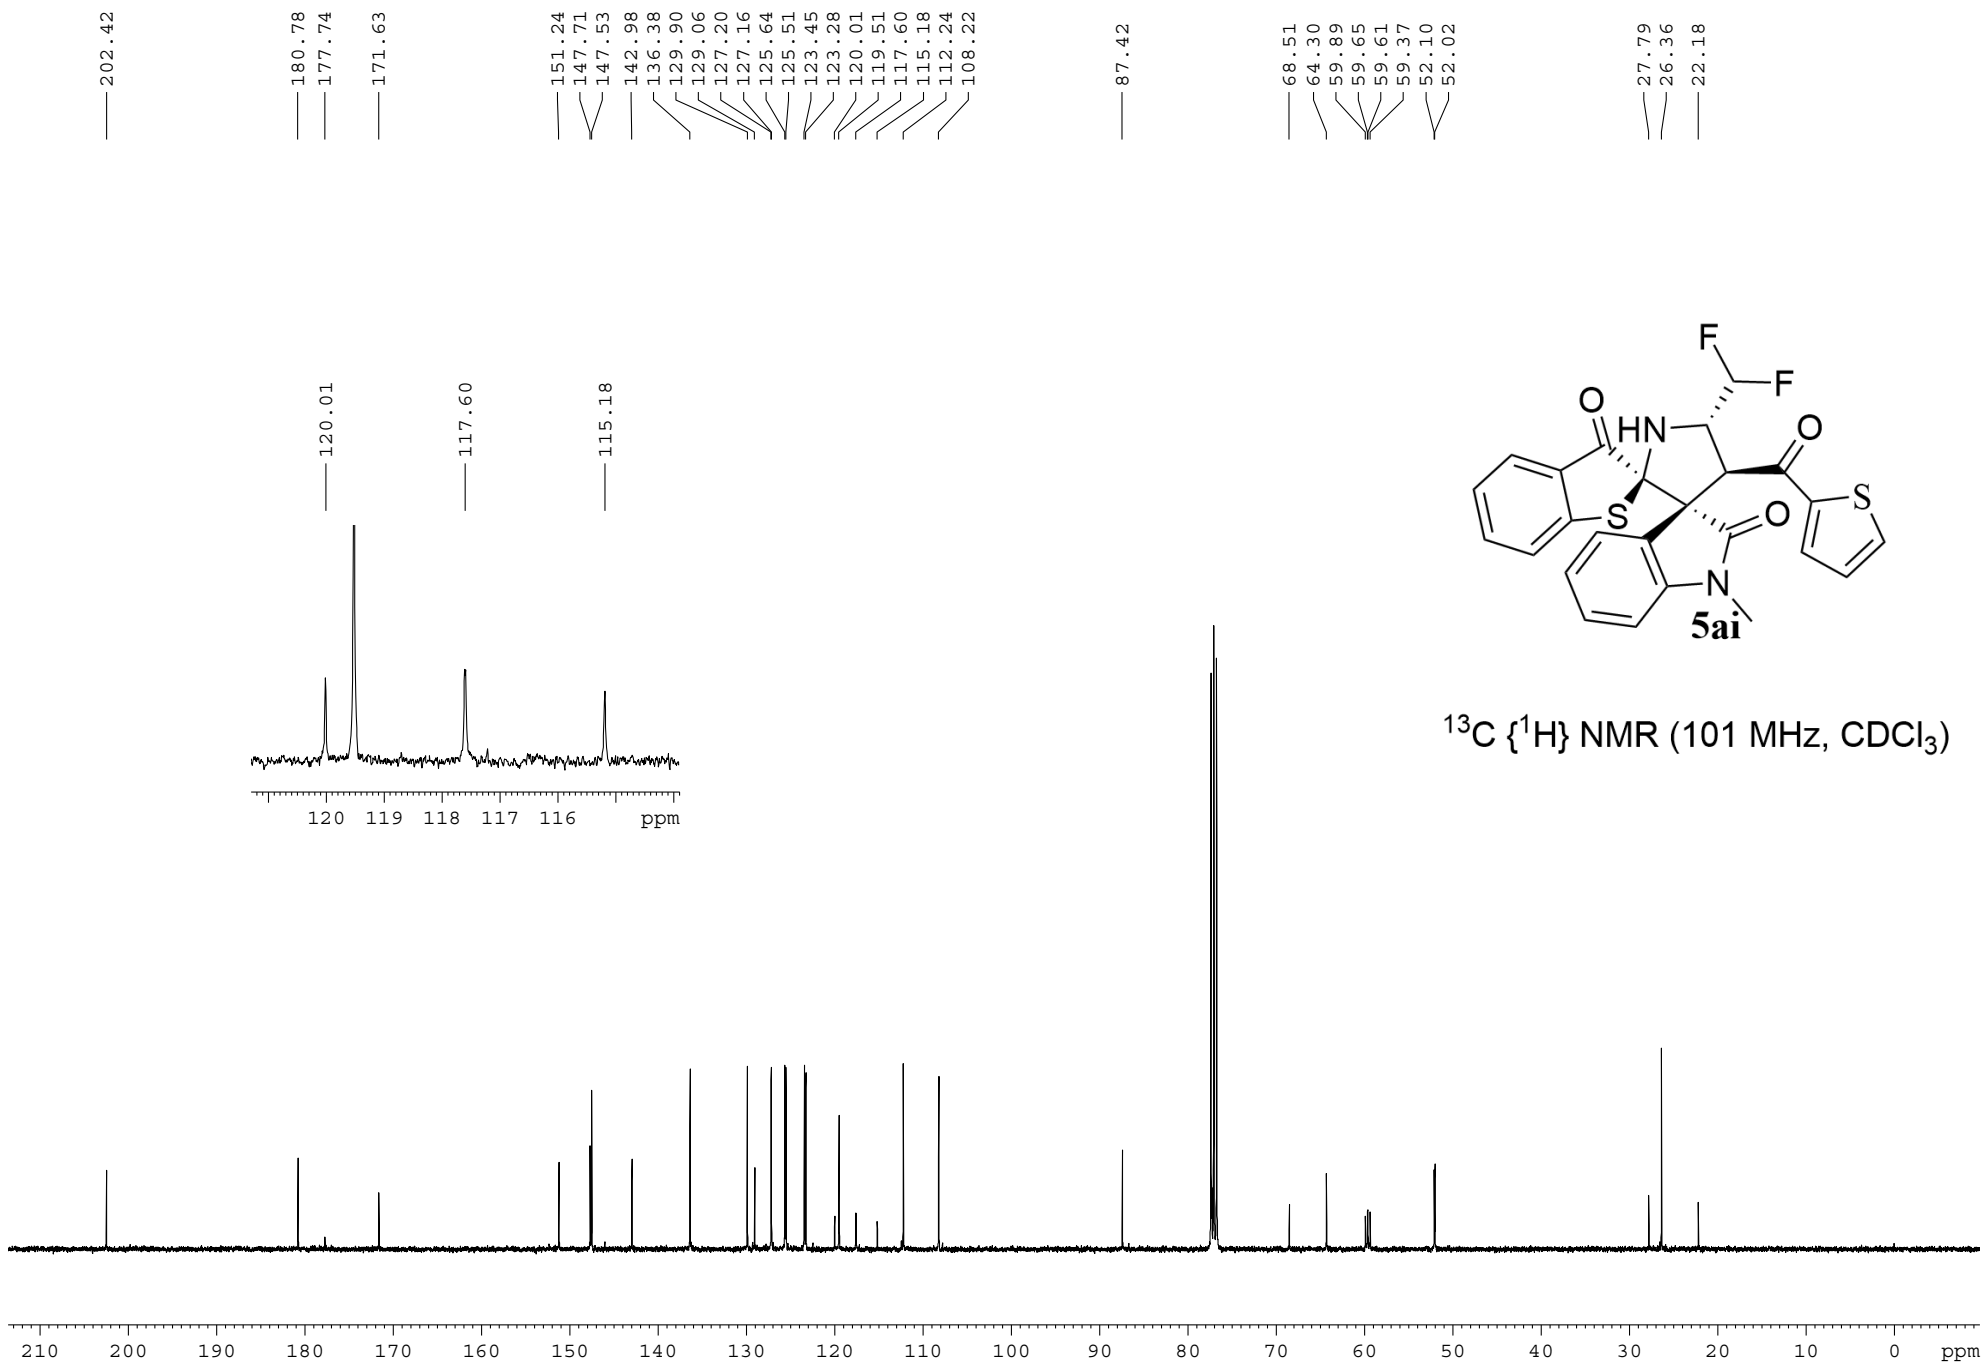

— -118.524

— -119.310

— -122.935

— -123.721

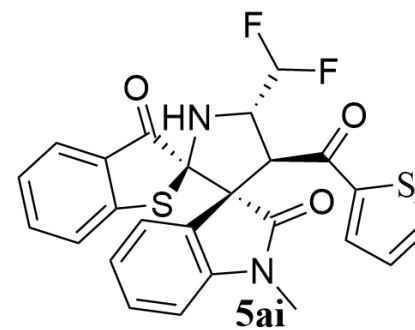

<sup>19</sup>F NMR (376 MHz, CDCl<sub>3</sub>)

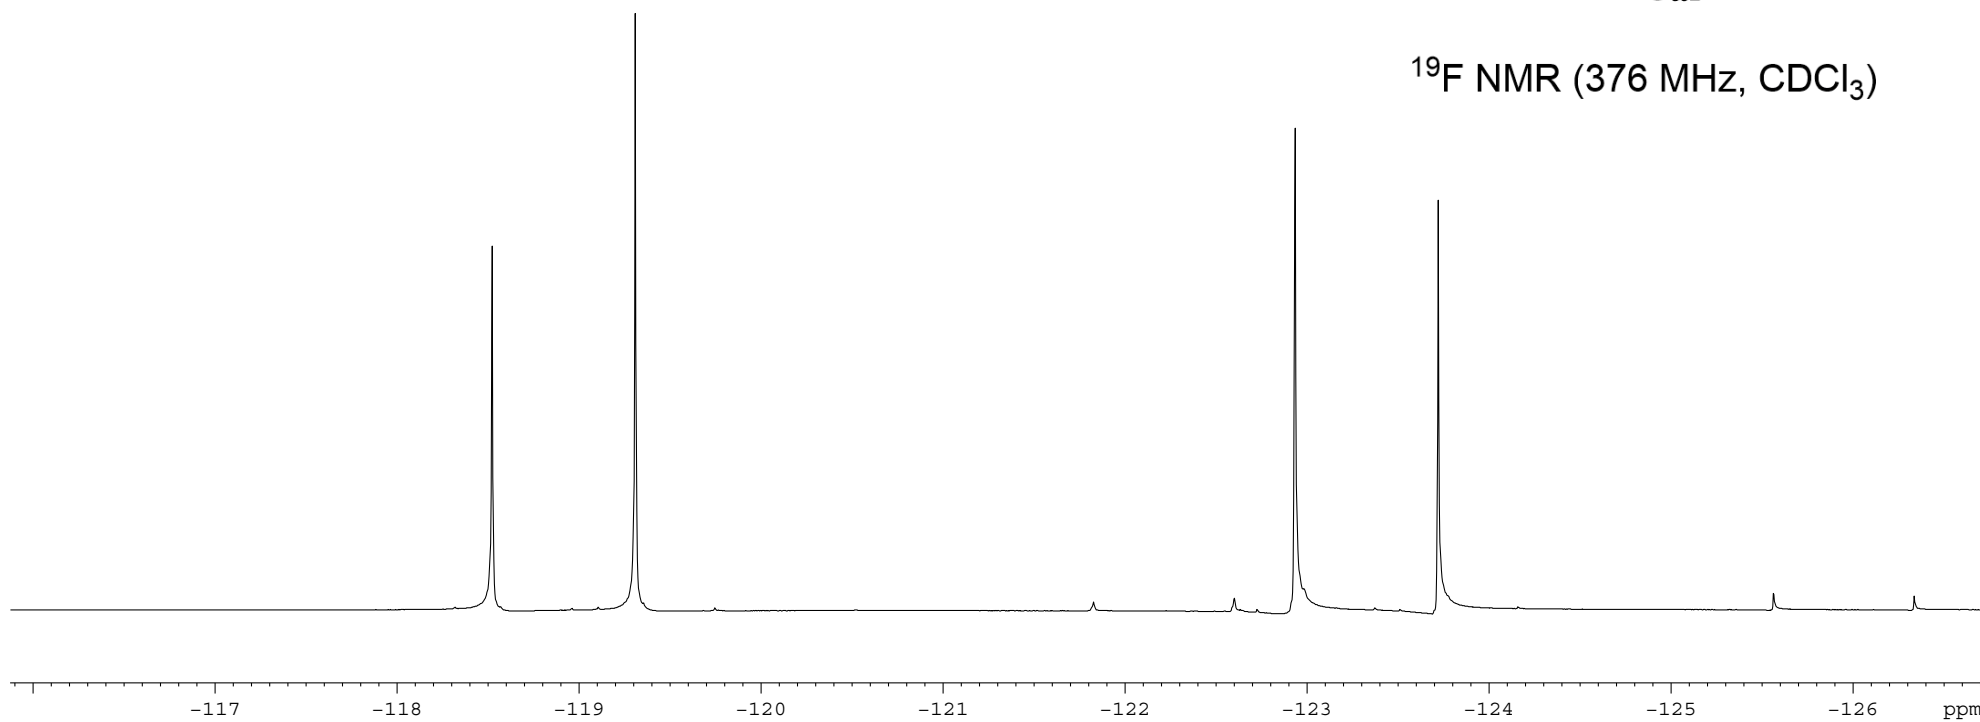

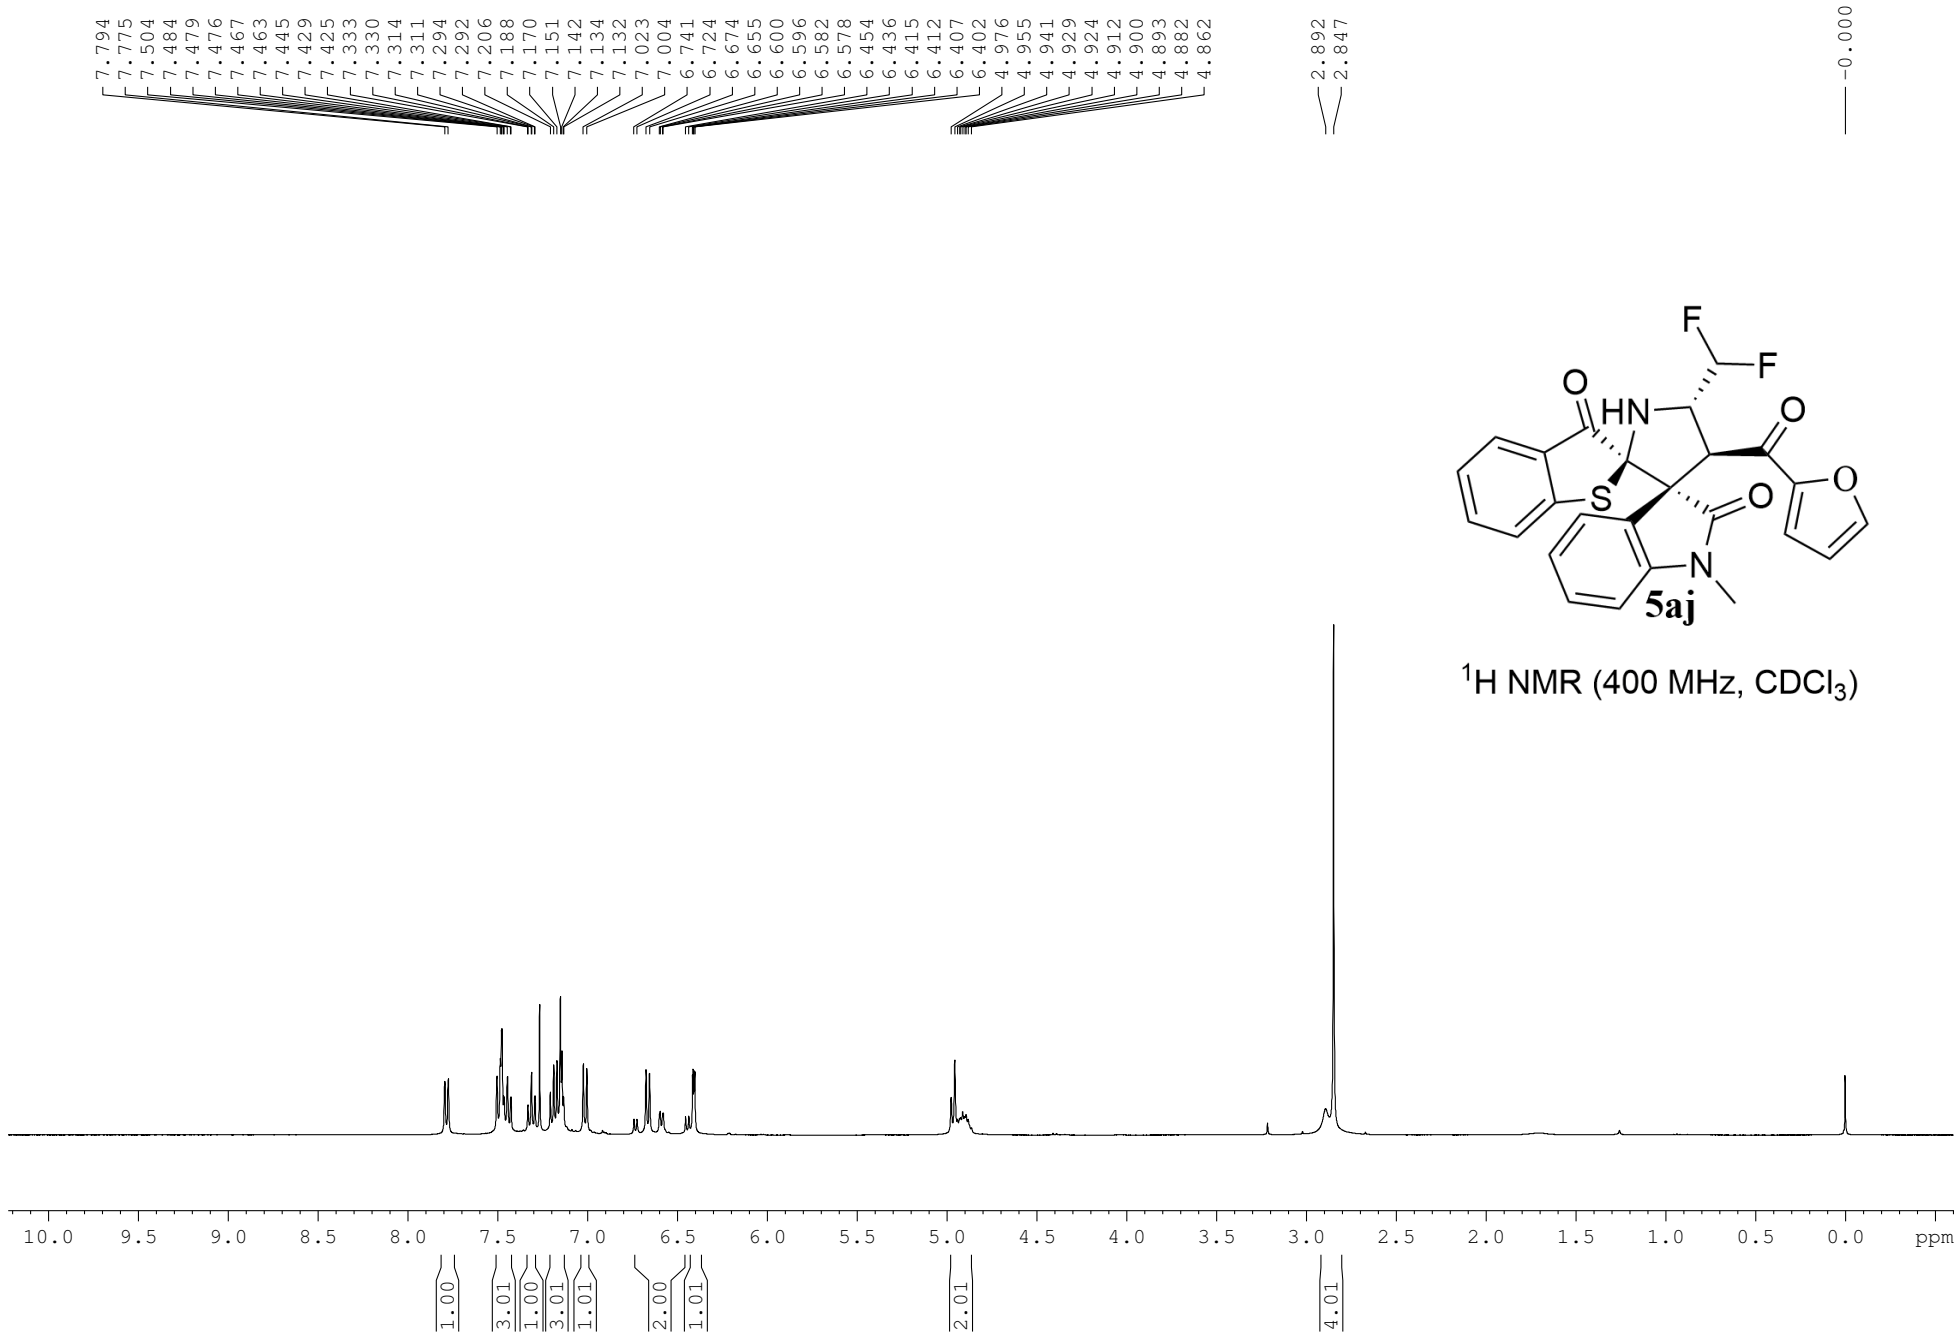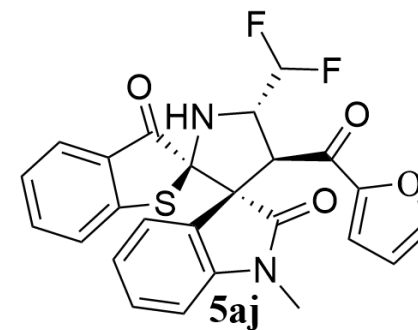

$^1\text{H}$  NMR (400 MHz,  $\text{CDCl}_3$ )

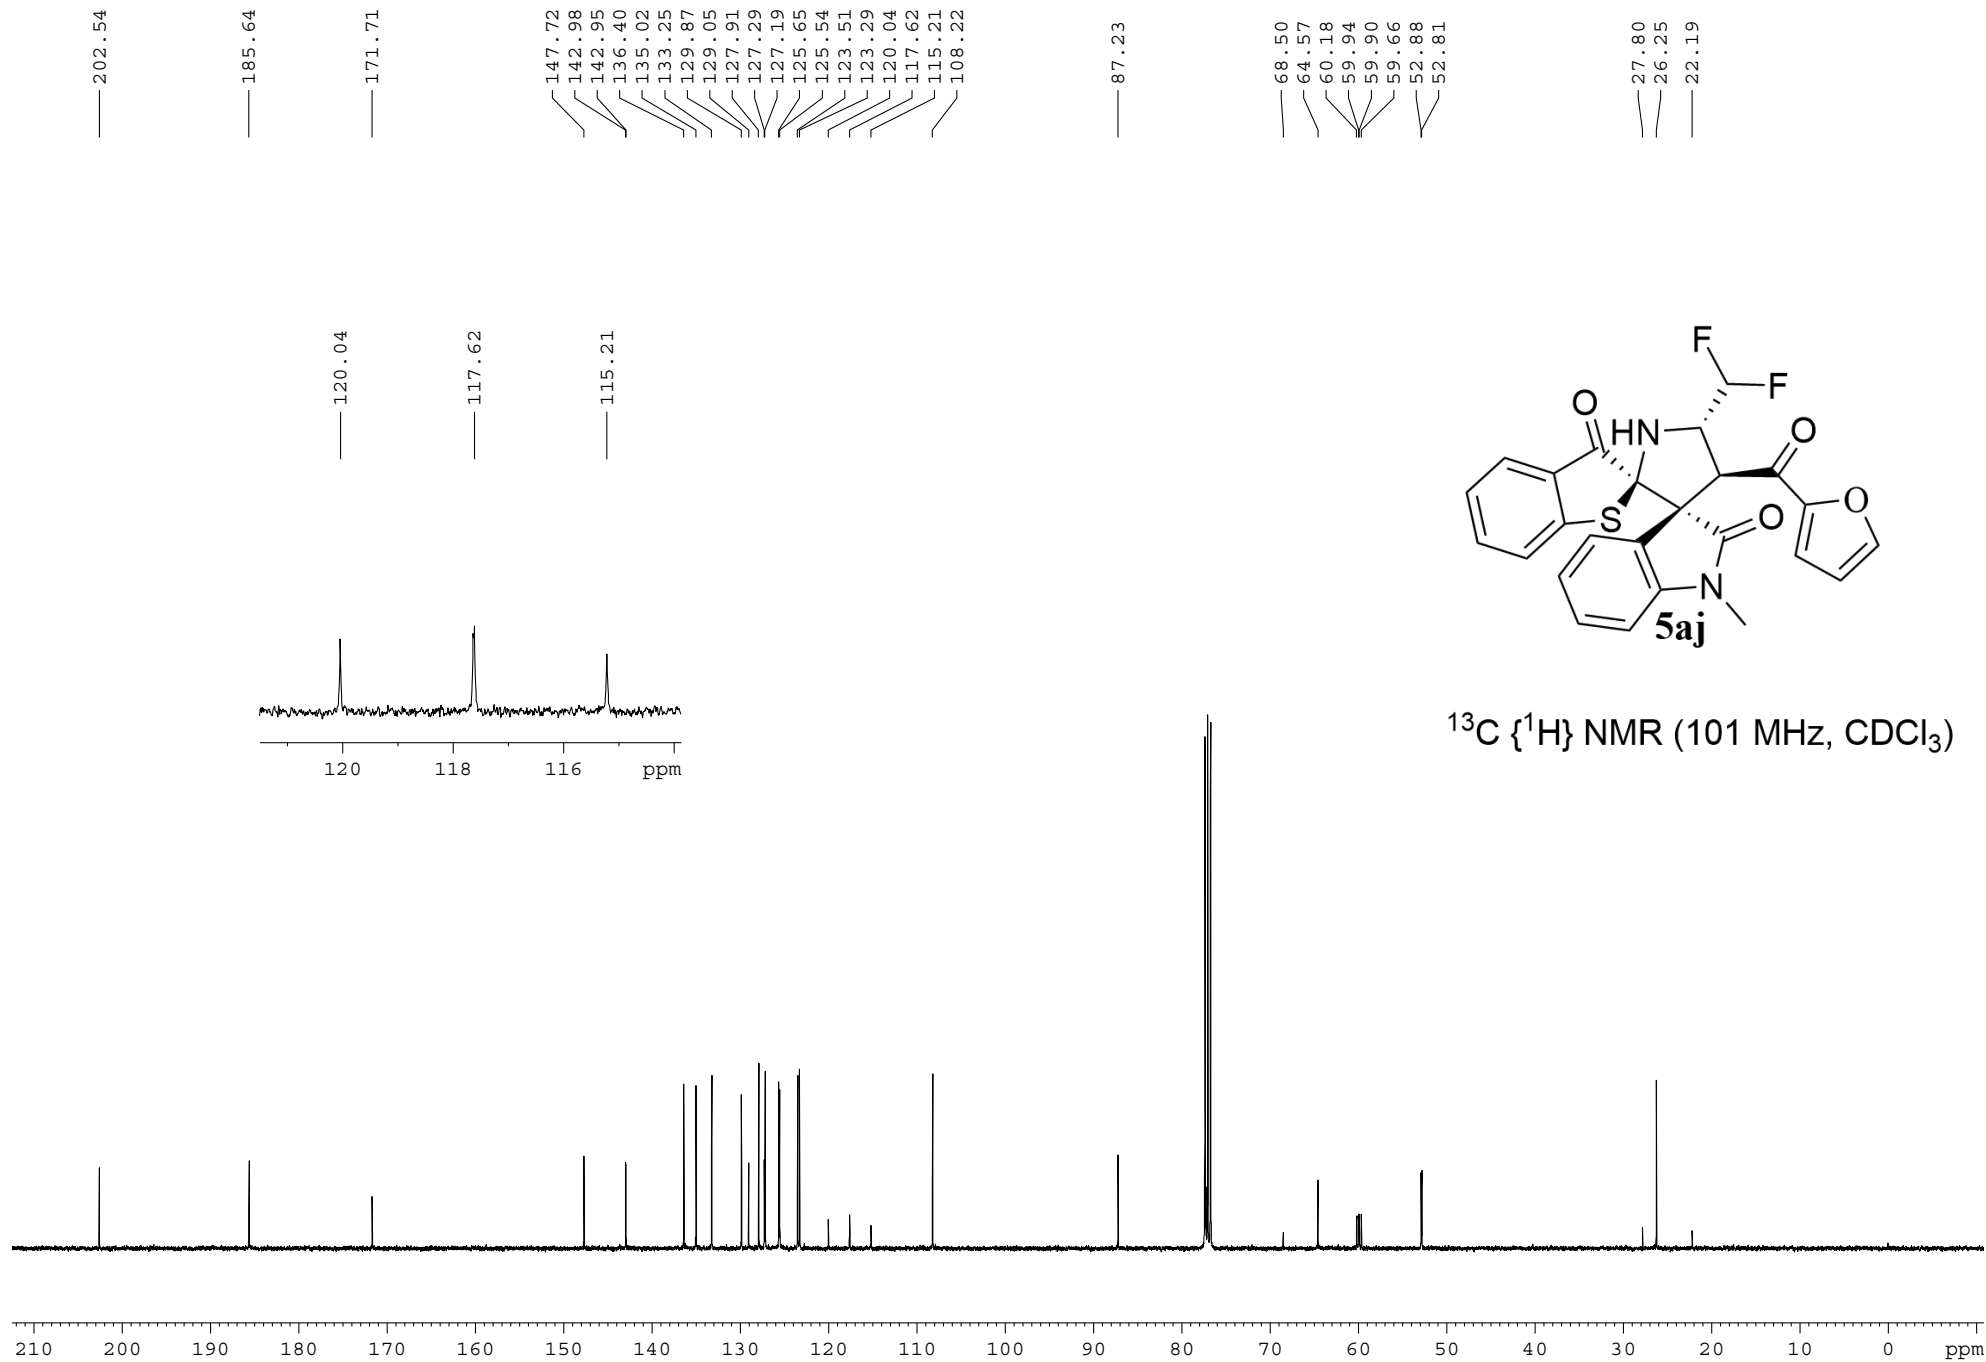

-118.495

-119.281

-122.862

-123.649

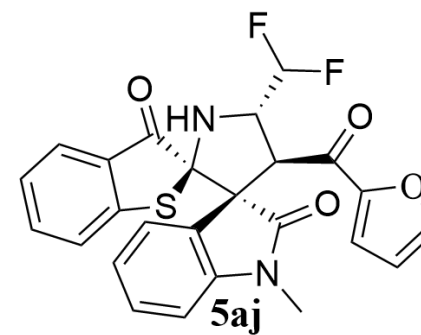

<sup>19</sup>F NMR (376 MHz, CDCl<sub>3</sub>)

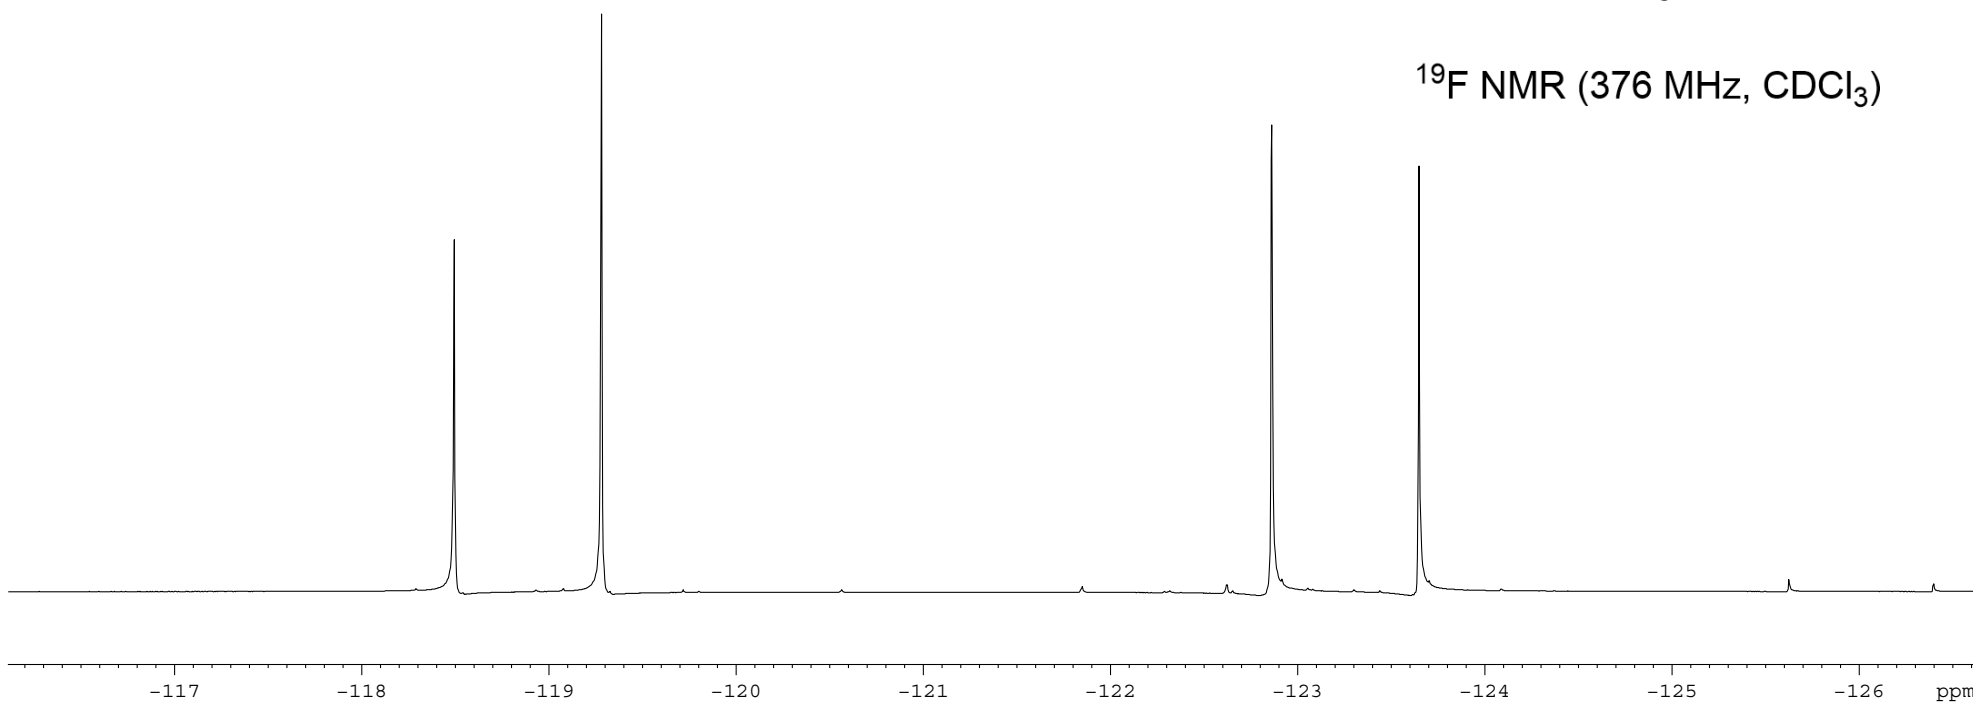

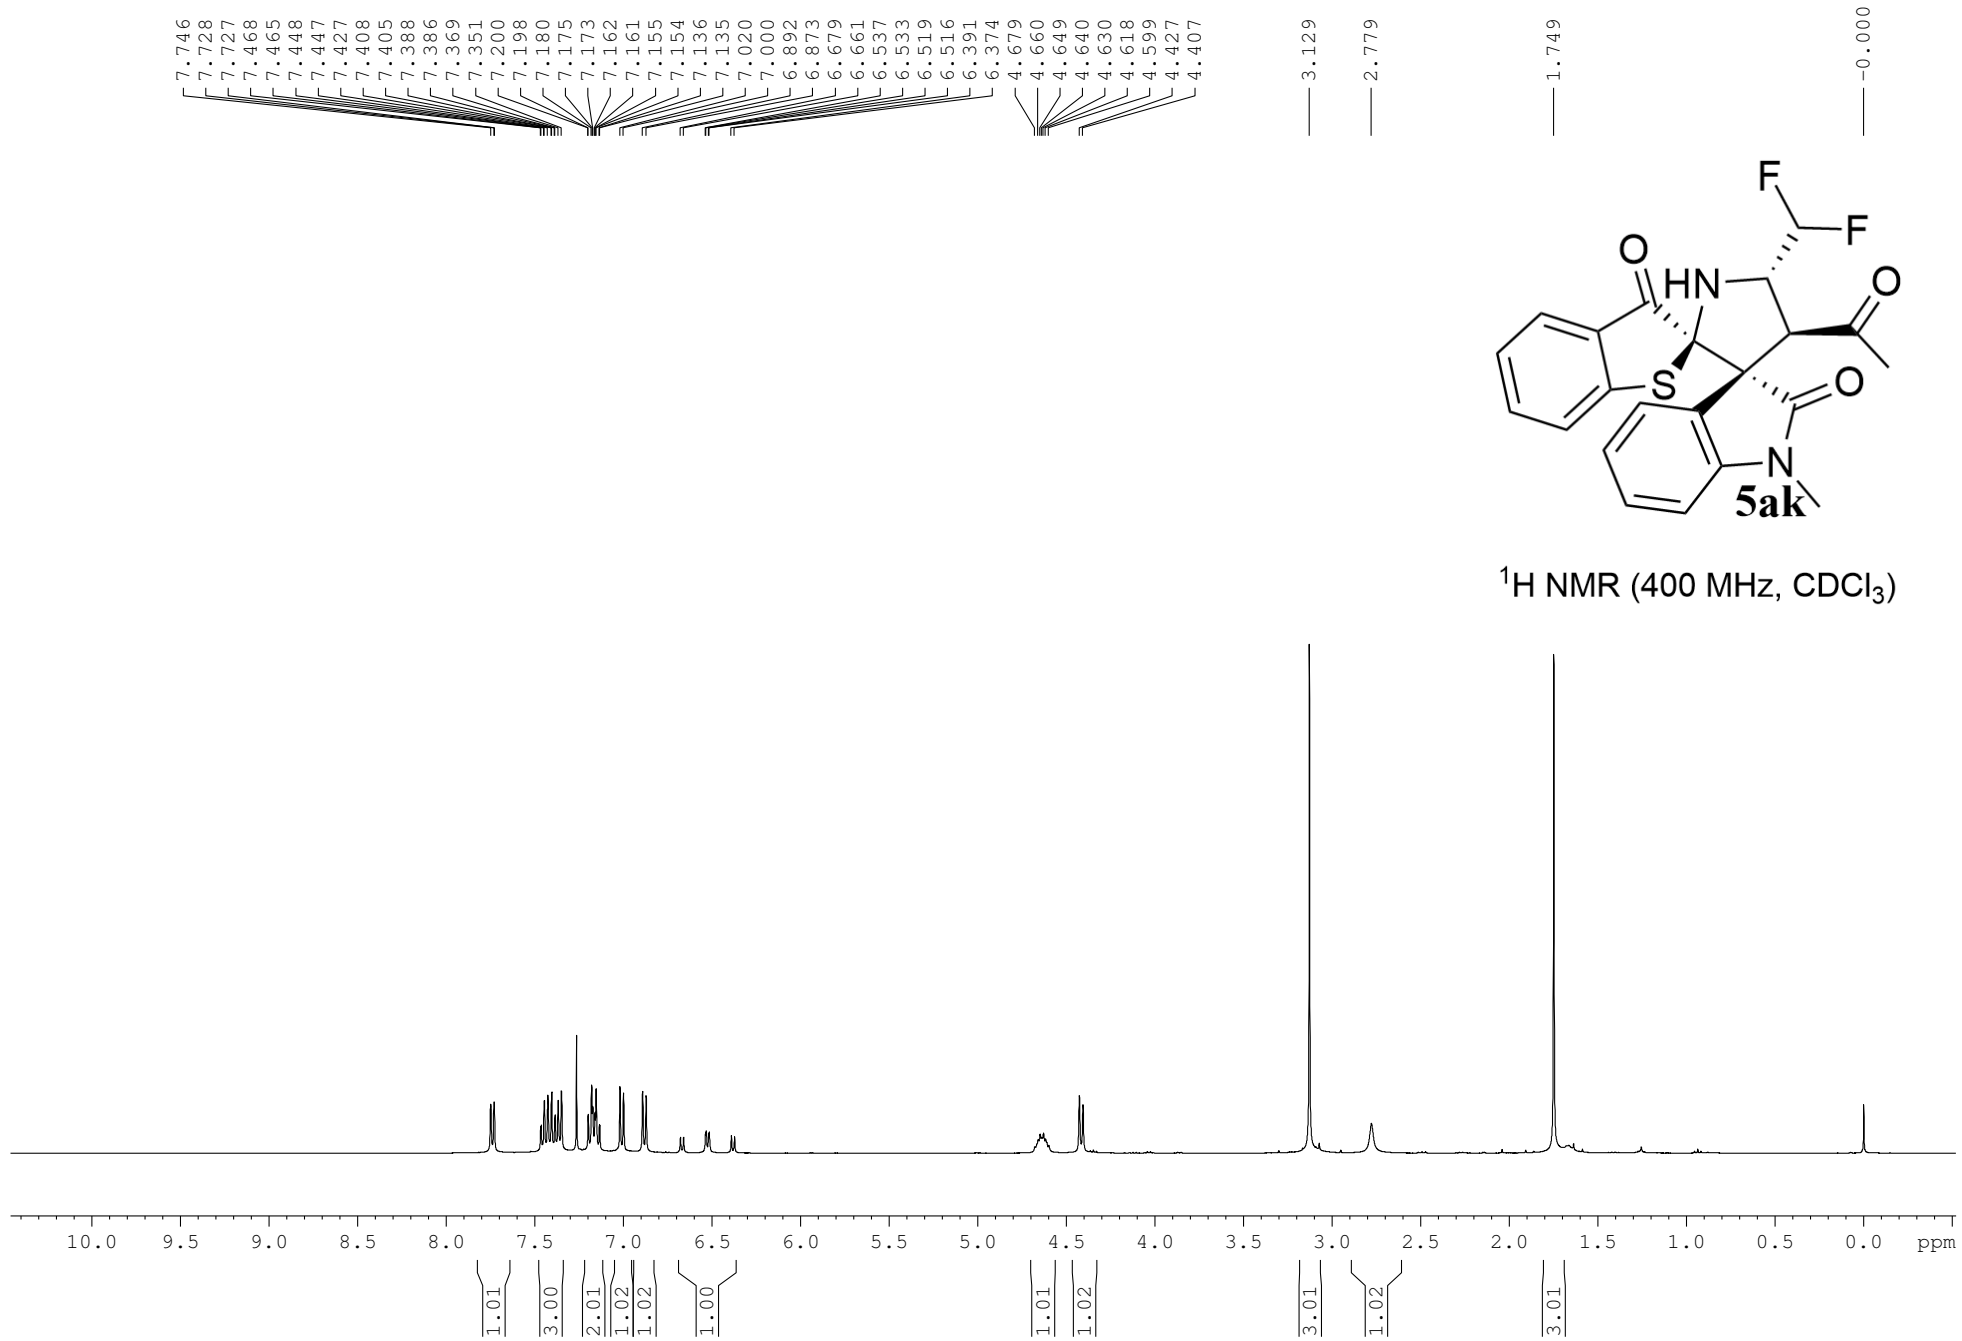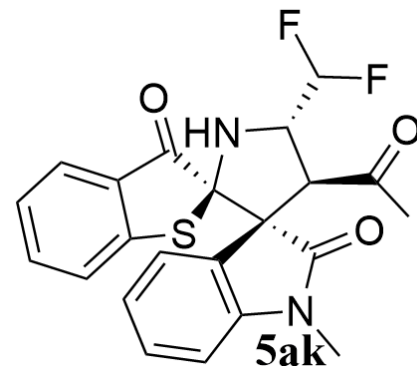

202.11  
200.53

171.73

147.74  
143.37  
136.43  
130.10  
128.84  
127.62  
127.31  
125.68  
124.90  
123.65  
123.22  
119.97  
117.57  
117.54  
115.14  
108.53

87.36

62.58  
59.23  
59.00  
58.95  
58.71  
56.89  
56.82

29.14  
26.77

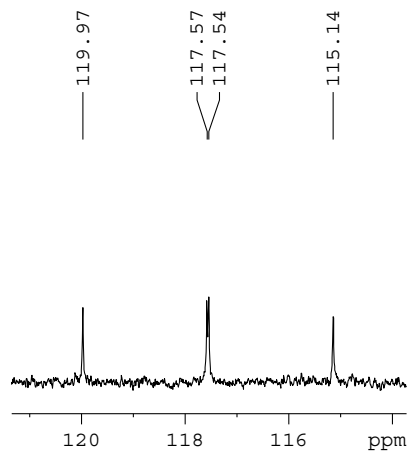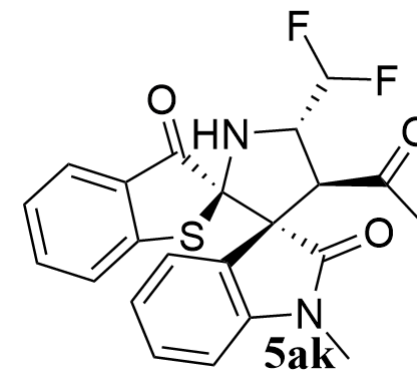

$^{13}\text{C}$  { $^1\text{H}$ } NMR (101 MHz,  $\text{CDCl}_3$ )

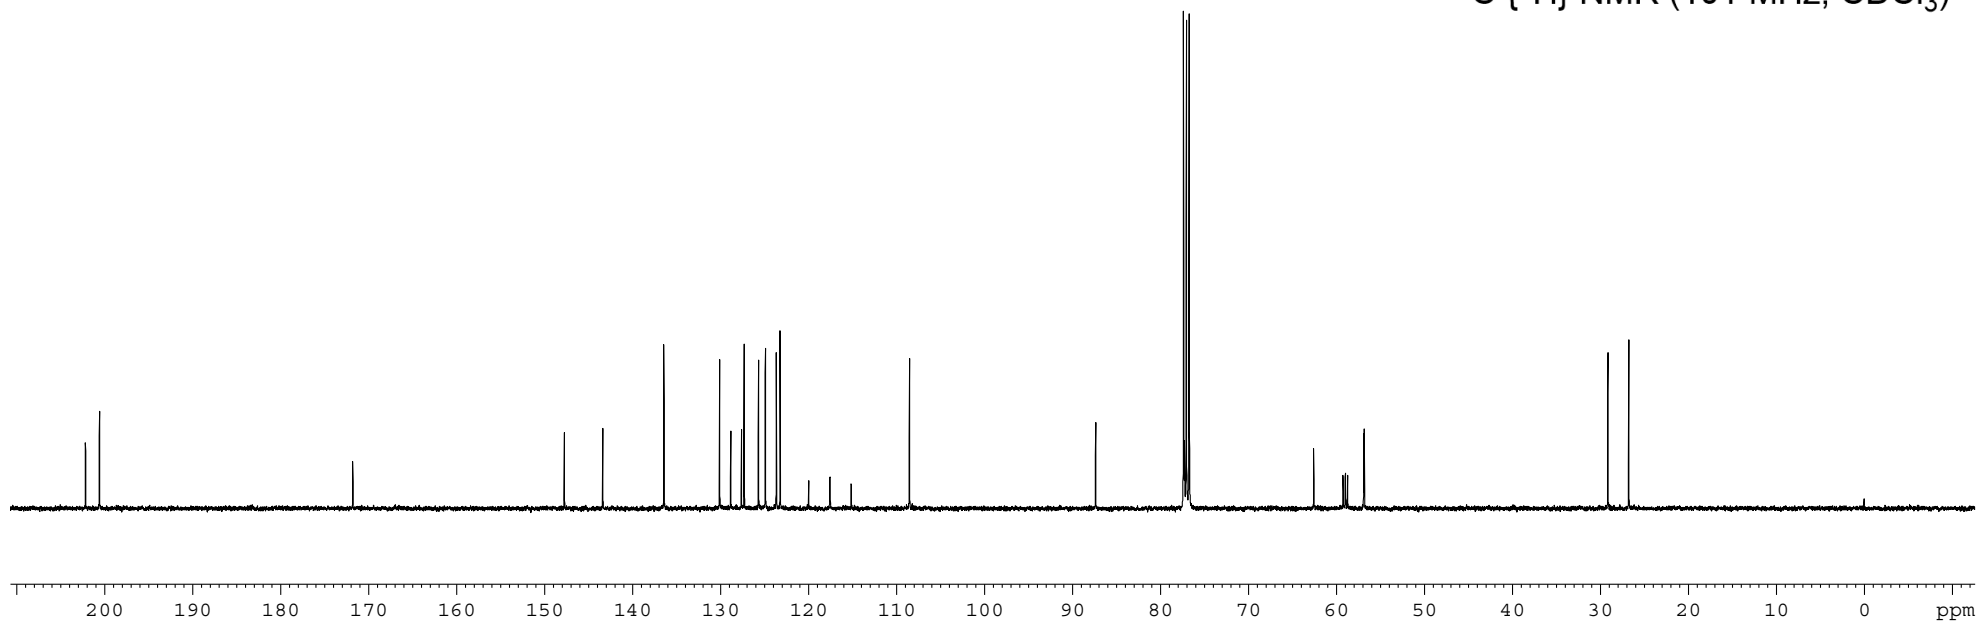

— -118.643

— -119.428

— -122.649

— -123.435

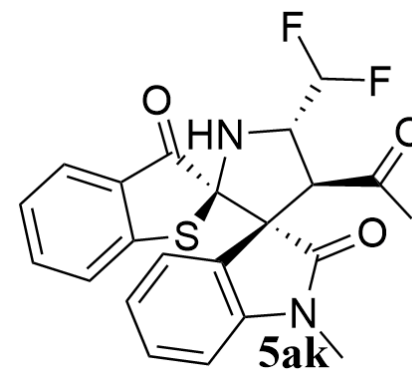

<sup>19</sup>F NMR (376 MHz, CDCl<sub>3</sub>)

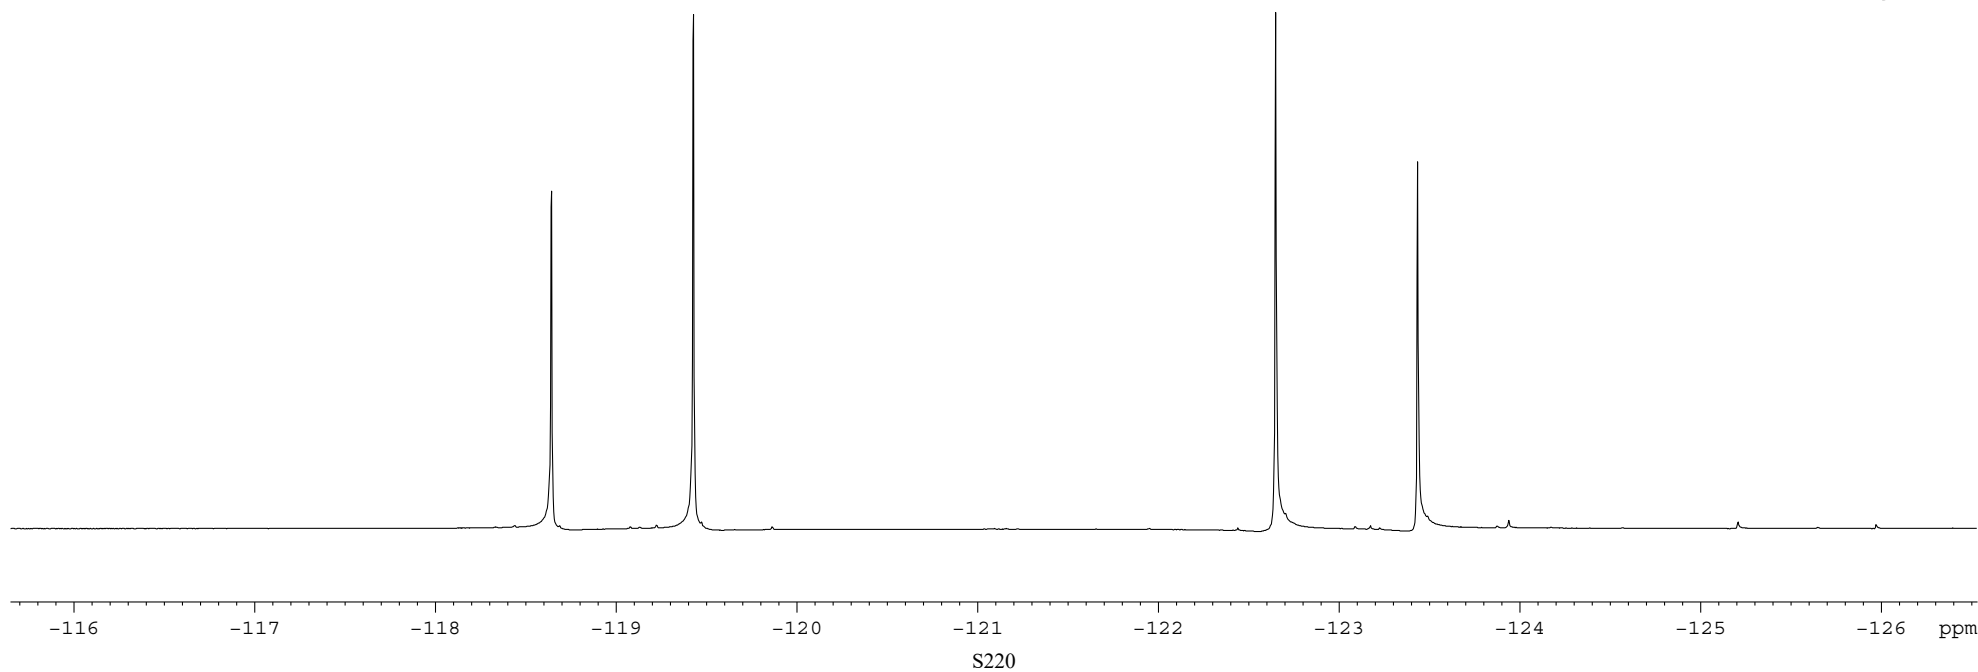



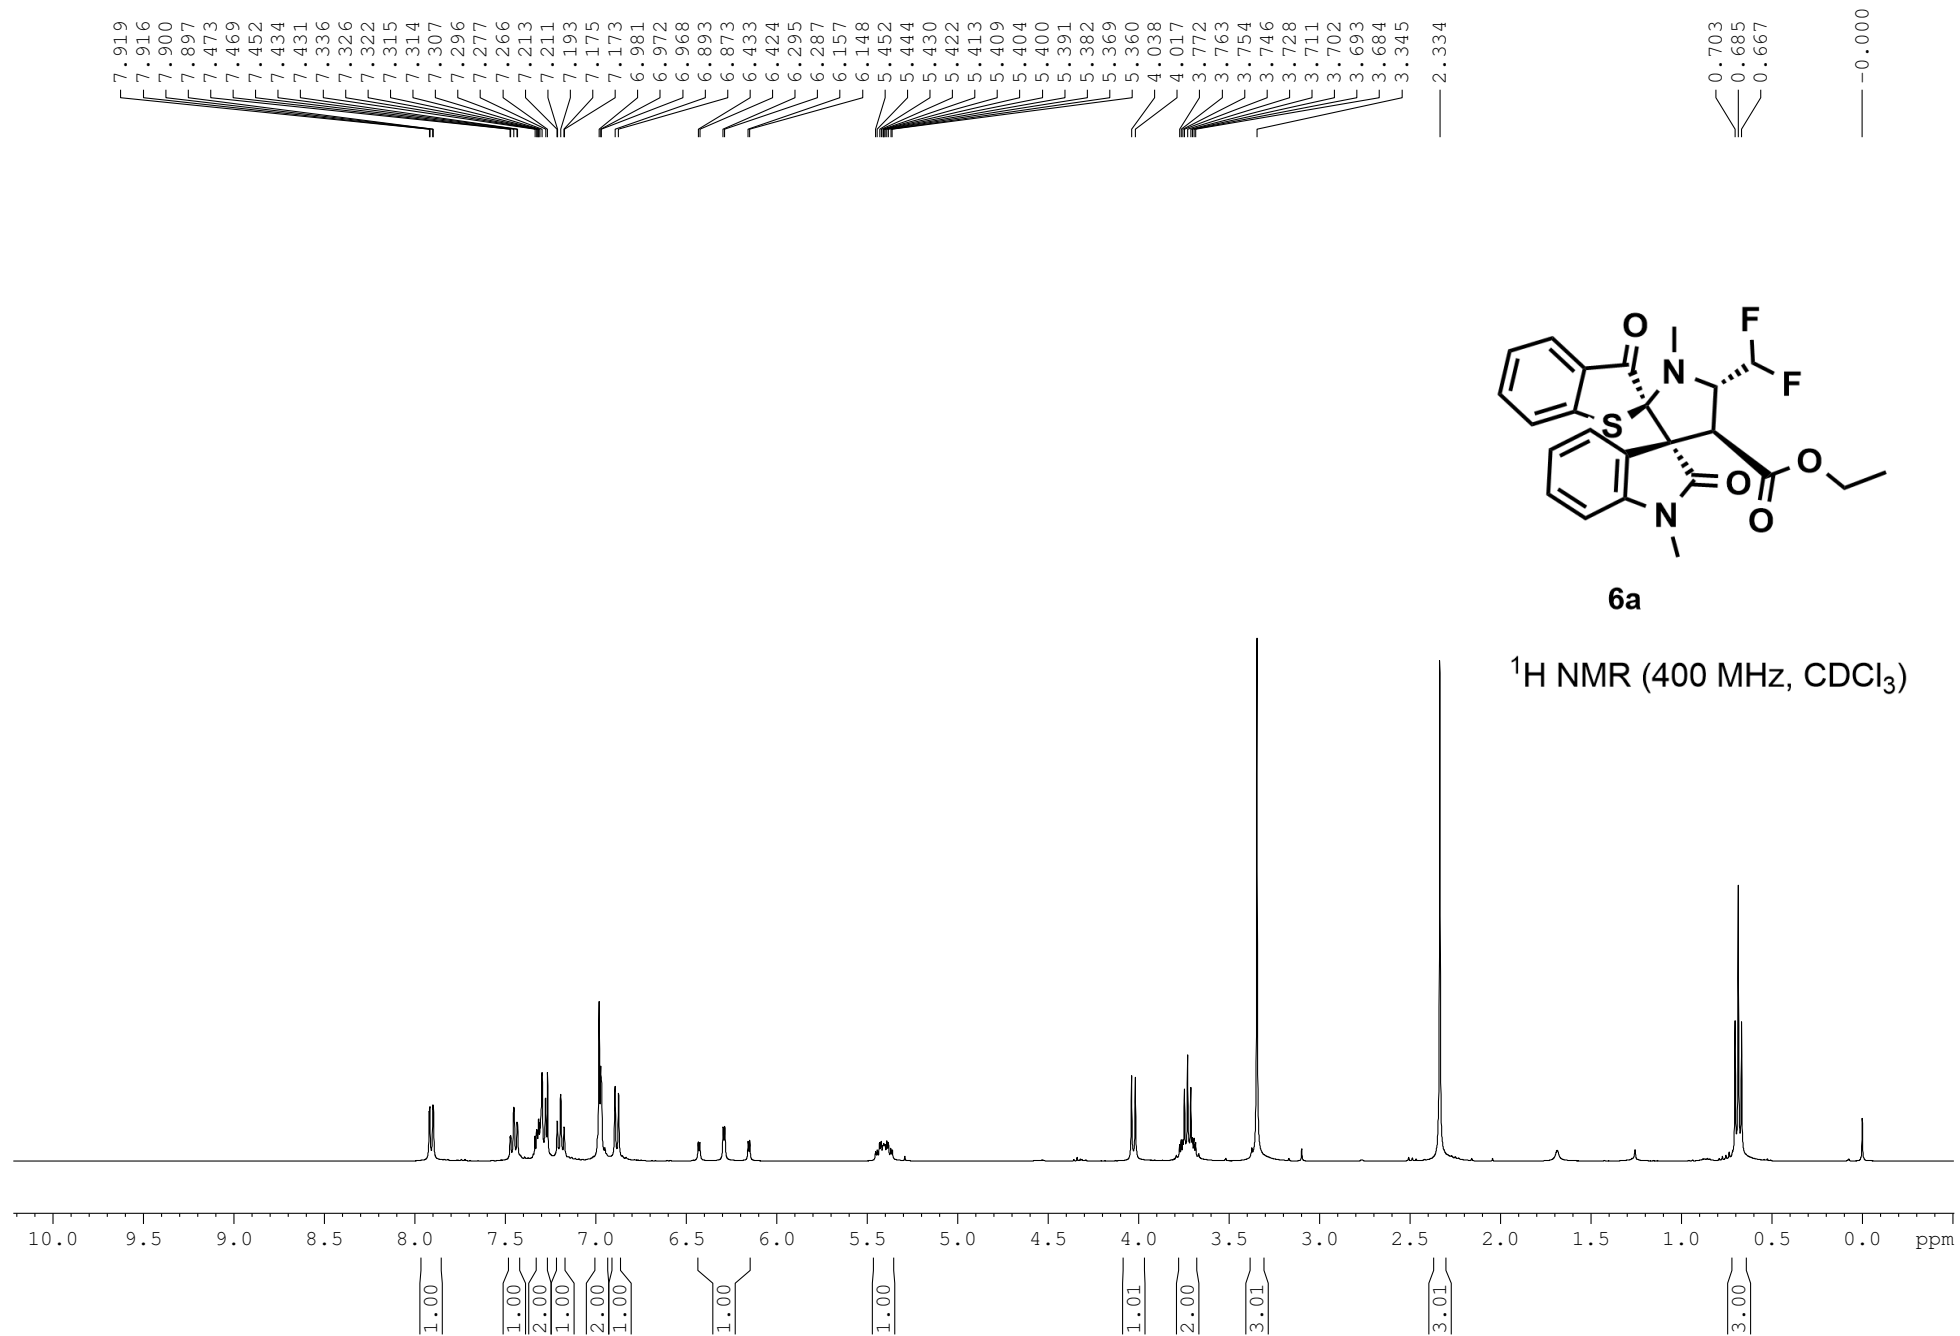

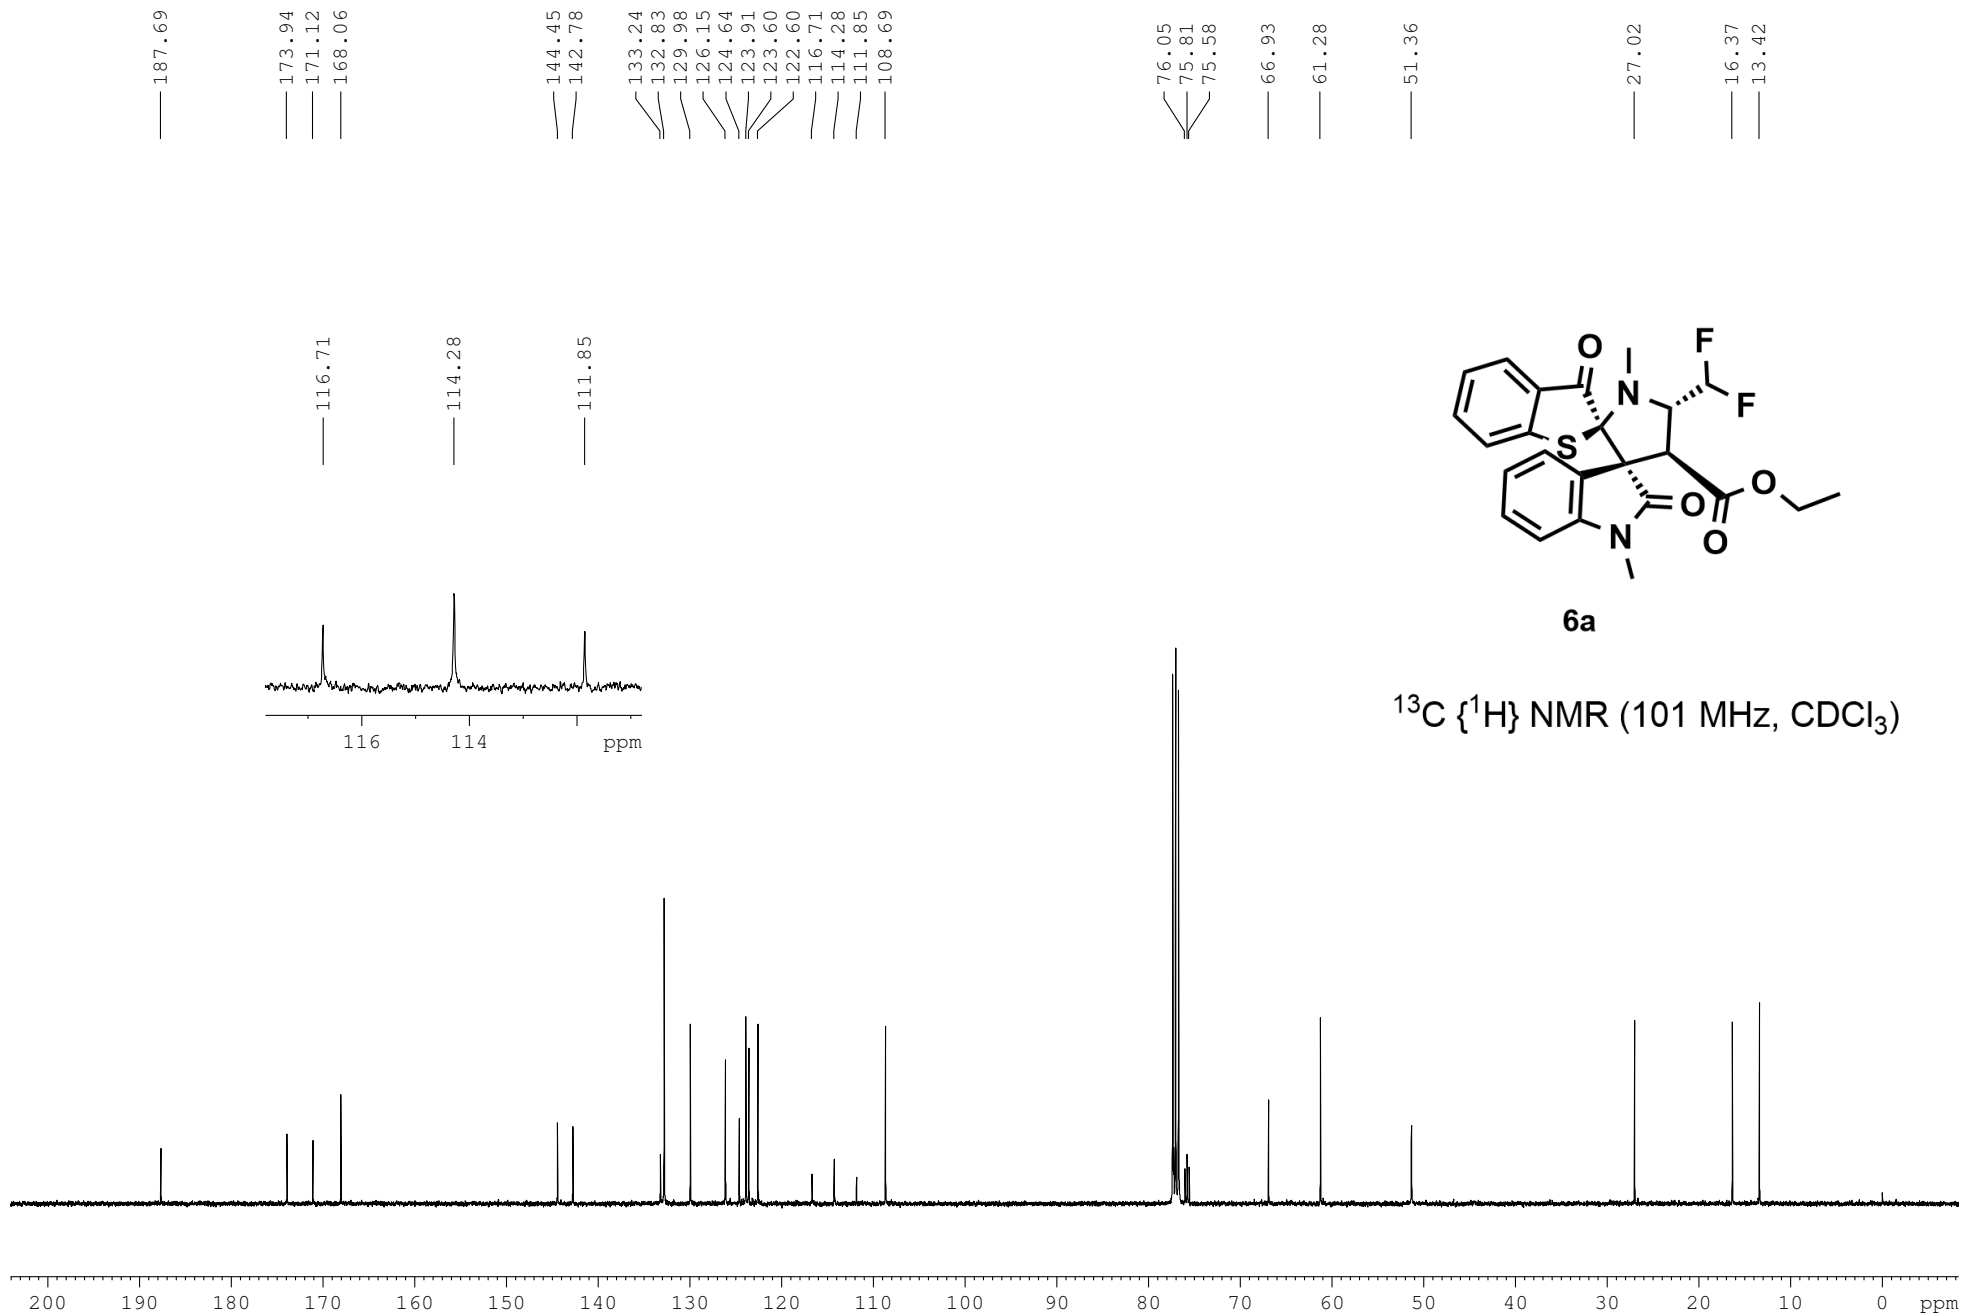

— -123.611

— -124.379

— -126.754

— -127.521

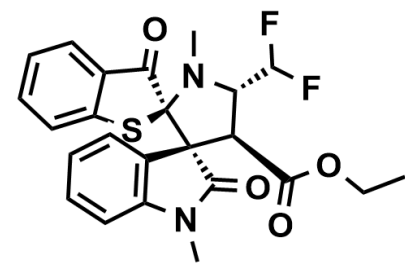

<sup>19</sup>F NMR (376 MHz, CDCl<sub>3</sub>)

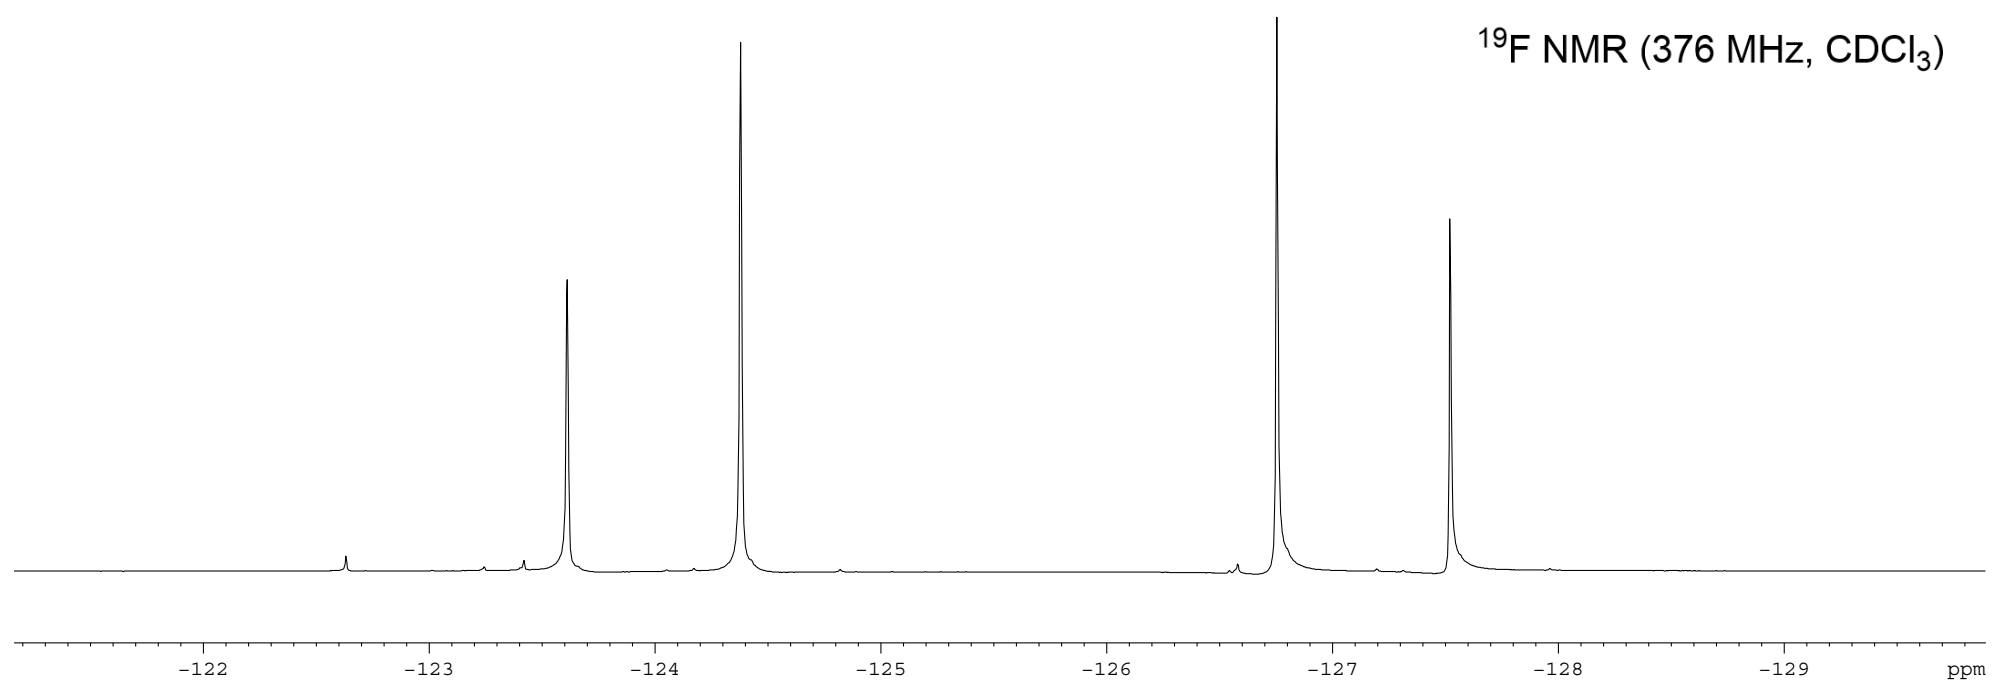

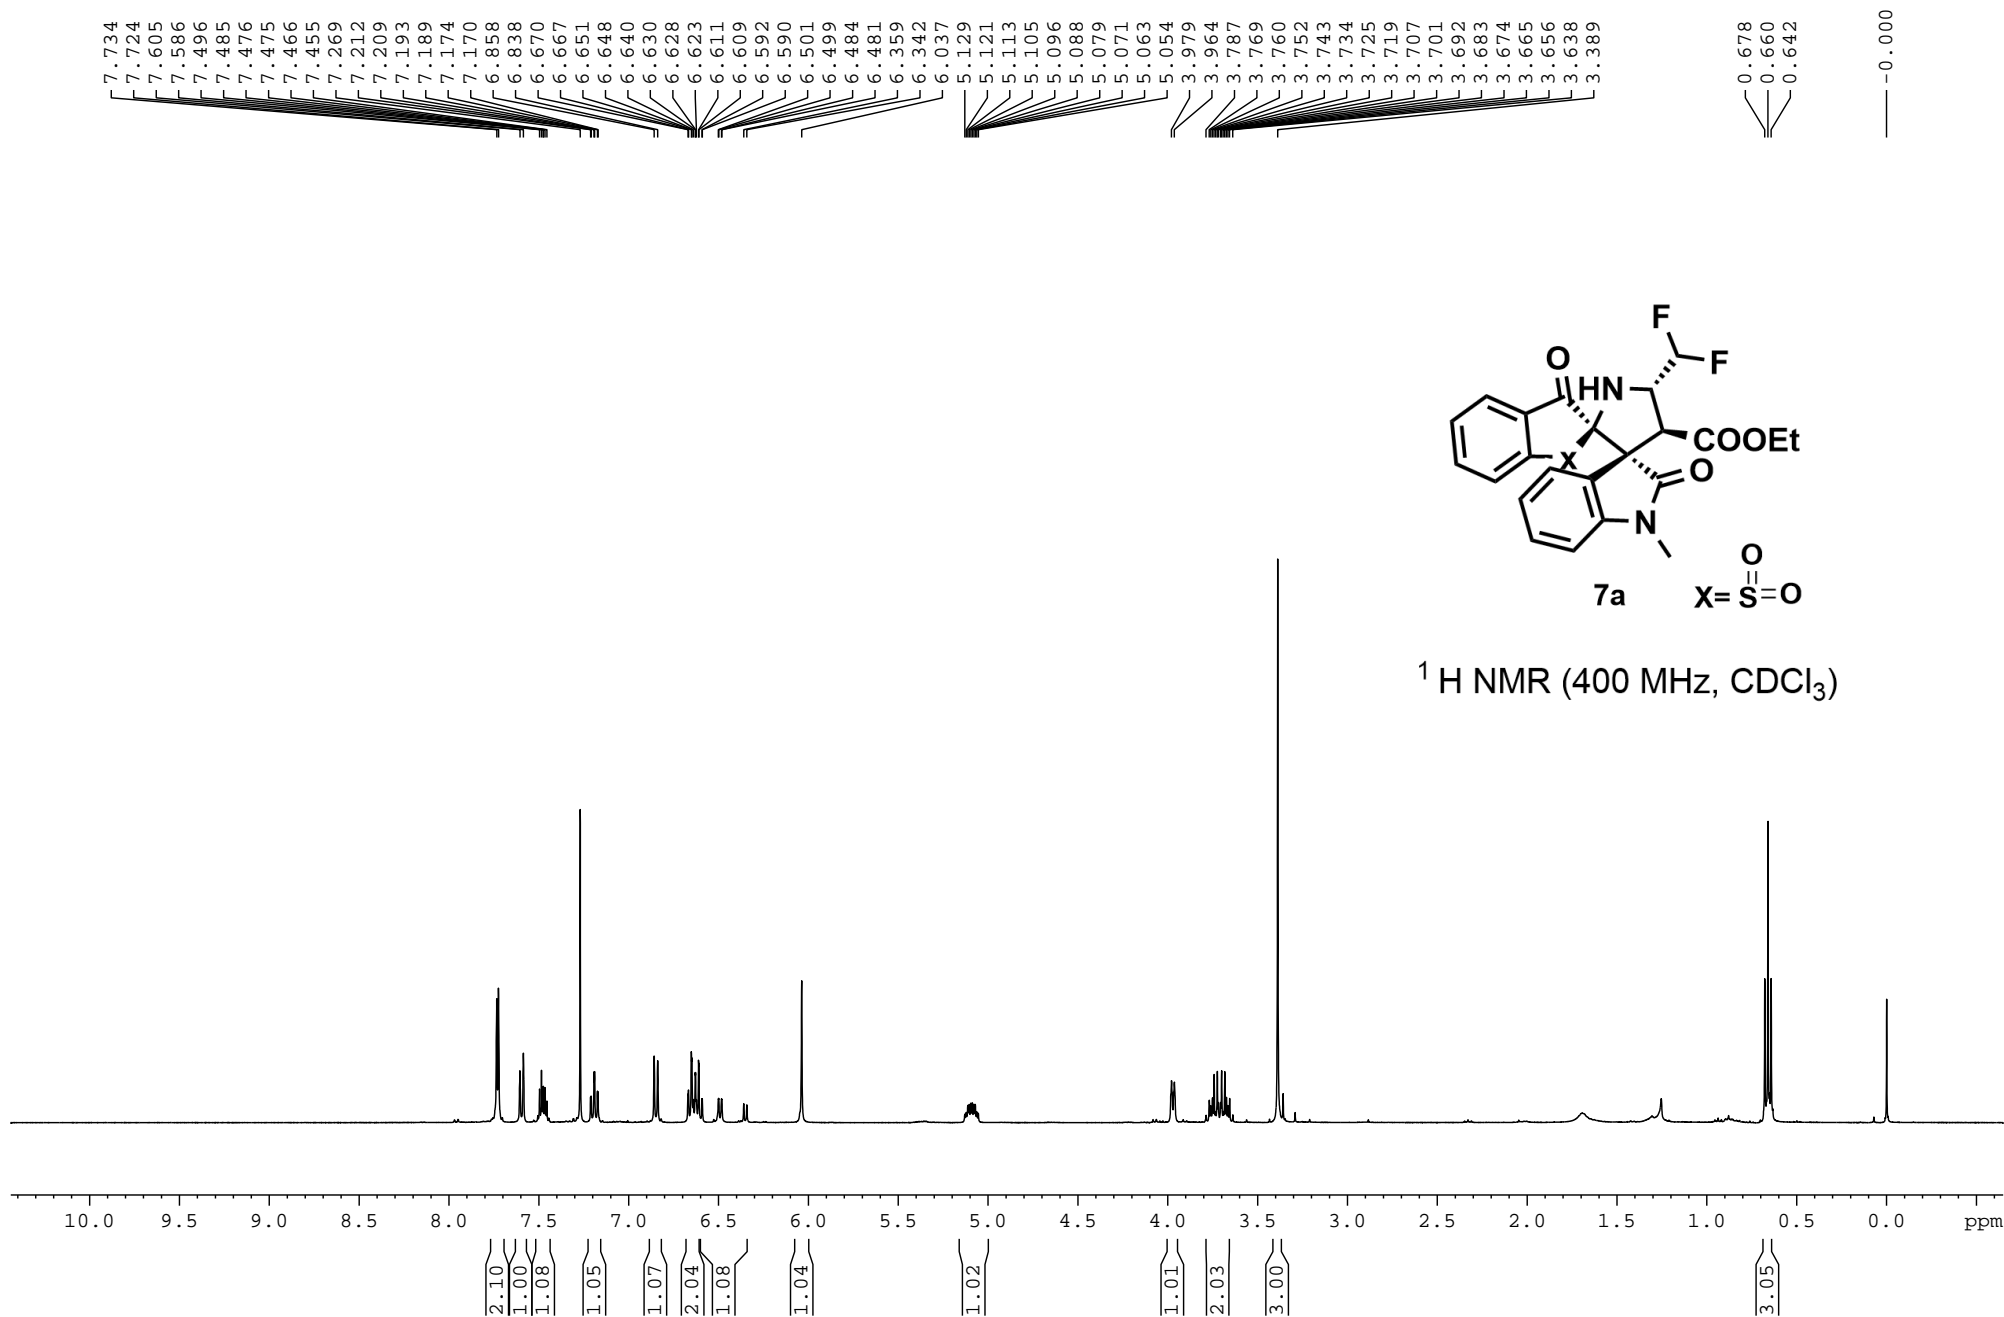

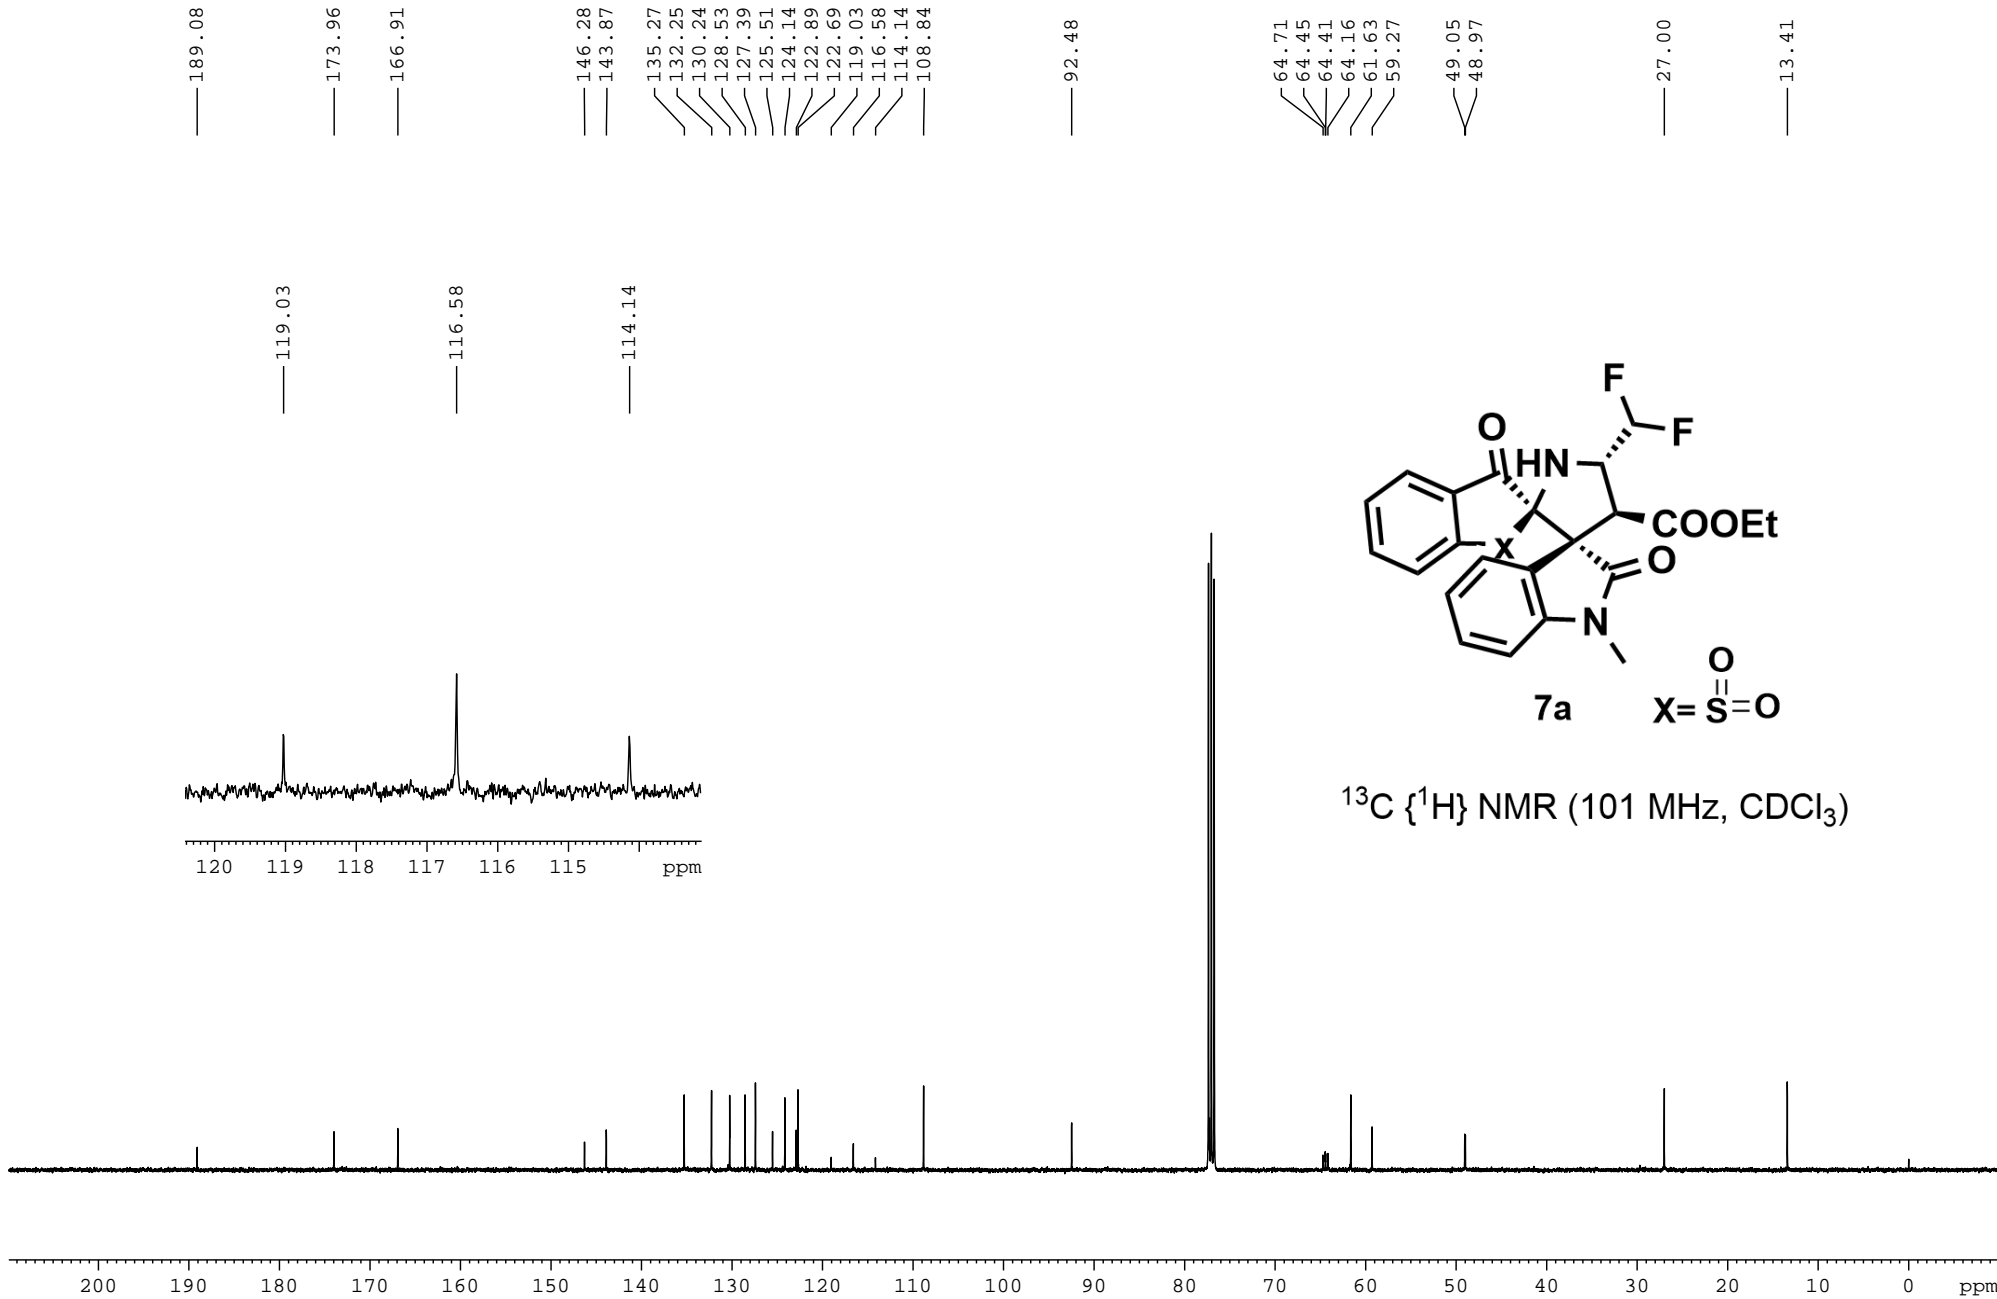

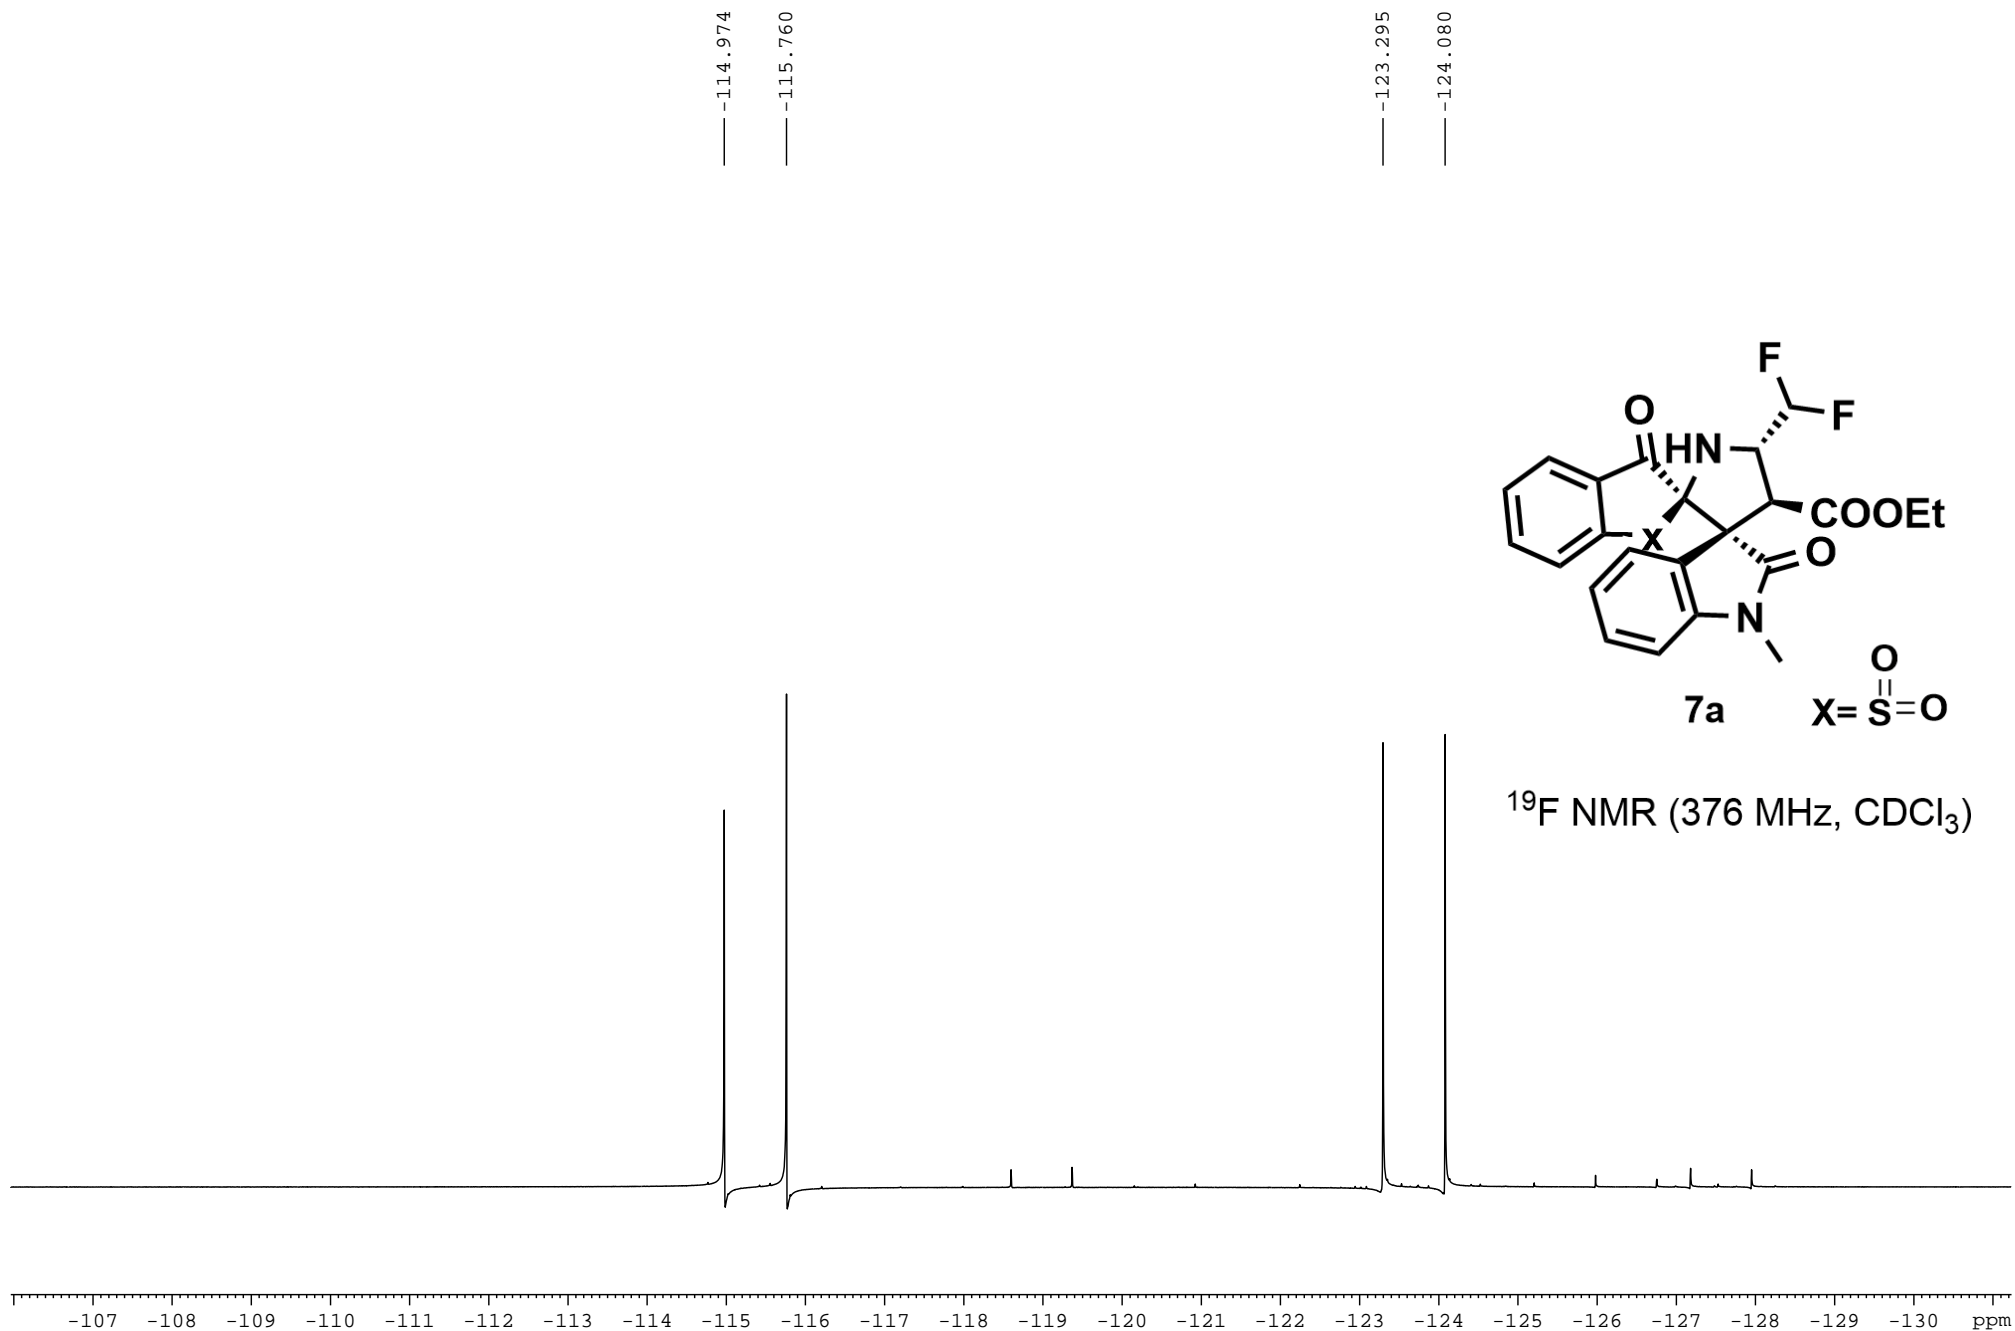

Supplement: d1qo01392k1.pdf [file d1qo01392k1.pdf]
